# Supplementary material for: Synthesis of condensed chiral pyranopyran derivatives with antiproliferative activity using domino Knoevenagel-IMHDA sequences
Source: Royal Society of Chemistry journal article supplement (doi:10.1039/d6ra02756c), 2026-05-06
Supplement: d6ra02756c1.pdf [file d6ra02756c1.pdf]

## Supporting information

# Synthesis of condensed chiral pyranopyran derivatives with antiproliferative activity using domino Knoevenagel-IMHDA sequences

Sándor Balázs Király,[a] \* Balázs Buglyó,[a,b] Otieno Michael Ooko,[a,b] Attila Bényei,[c] Erika Lisztes,[d] Balázs István Tóth,[d] Tamás Bíró,[e] Kristóf Borozsnyai,[a] Dávid Oláh,[a] Gábor Vasvári,[f] Dániel Nemes,[f] Miklós Vecsernyés,[g] Ferenc Fenyvesi,[h] and Tibor Kurtán[a] \*

---

[a] Dr. S. B. Király, B. Buglyó, O. M. Ooko, K. Borozsnyai, D. Oláh, Prof. T. Kurtán  
Department of Organic Chemistry  
University of Debrecen,  
P. O. Box 400, 4002 Debrecen, Hungary  
E-mail: [kiraly.sandor.balazs@science.unideb.hu](mailto:kiraly.sandor.balazs@science.unideb.hu), [kurtan.tibor@science.unideb.hu](mailto:kurtan.tibor@science.unideb.hu)

[b] B. Buglyó, O. M. Ooko  
Doctoral School of Chemistry  
University of Debrecen  
Egyetem square 1, 4032 Debrecen, Hungary

[c] Dr. A. Bényei  
Department of Physical Chemistry  
University of Debrecen  
4032 Debrecen, Egyetem square 1, Hungary

[d] Dr. E. Lisztes, Dr. B. I. Tóth  
Department of Physiology  
University of Debrecen  
4032 Debrecen, Nagyerdei krt. 98., Hungary

[e] Dr. T. Bíró  
Department of Immunology  
University of Debrecen  
4032 Debrecen, Egyetem square 1, Hungary

[f] Dr. G. Vasvári, Dr. D. Nemes  
Department of Pharmaceutical Technology  
University of Debrecen  
4002 Debrecen, Rex Ferenc street 1.

[g] Prof. M. Vecsernyés  
Department Of Pharmaceutical Surveillance and Economics  
University of Debrecen  
4002 Debrecen, Rex Ferenc street 1.

[h] Prof. F. Fenyvesi  
Department of Molecular and Nanopharmaceutics  
University of Debrecen  
4002 Debrecen, Rex Ferenc street 1.

## Table of Contents

|                                                                                                                                            |     |
|--------------------------------------------------------------------------------------------------------------------------------------------|-----|
| Table of Figures .....                                                                                                                     | 3   |
| List of Tables.....                                                                                                                        | 10  |
| 1. Preparation of the starting materials of the domino reaction .....                                                                      | 11  |
| 2. NMR spectra of condensed heterocycles <b>4-7</b> .....                                                                                  | 12  |
| 3. ECD and HPLC-ECD spectra of condensed heterocycles.....                                                                                 | 181 |
| 3.1. ECD Spectra of <b>4ba-be</b> , <b>6ba-be</b> and <b>5ba-be</b> : .....                                                                | 181 |
| 3.2. HPLC-ECD spectra of <b>4aa-ae</b> , <b>5aa-ae</b> , <b>6aa-ae</b> and <b>7aa-ae</b> .....                                             | 187 |
| 4. <i>In vitro</i> antiproliferative activity of the products of the domino reactions against A2780 and WM35 human cancer cell lines ..... | 200 |
| 5. X-Ray diffraction data .....                                                                                                            | 206 |

## Table of Figures

|                                                                                                                                                                                                                                  |    |
|----------------------------------------------------------------------------------------------------------------------------------------------------------------------------------------------------------------------------------|----|
| Figure S1. <sup>1</sup> H-NMR spectrum of <i>rac</i> -(6a <i>S</i> *,12b <i>R</i> *,19b <i>S</i> *)- <b>4aa</b> in CDCl <sub>3</sub> at 400 MHz.....                                                                             | 12 |
| Figure S2. <sup>13</sup> C-NMR spectrum of <i>rac</i> -(6a <i>S</i> *,12b <i>R</i> *,19b <i>S</i> *)- <b>4aa</b> in CDCl <sub>3</sub> at 100 MHz.....                                                                            | 13 |
| Figure S3. NOESY spectrum of <i>rac</i> -(6a <i>S</i> *,12b <i>R</i> *,19b <i>S</i> *)- <b>4aa</b> in CDCl <sub>3</sub> at 400 MHz. ....                                                                                         | 14 |
| Figure S4. <sup>1</sup> H-NMR spectrum of <i>rac</i> -(6a <i>S</i> *,12b <i>R</i> *,19b <i>S</i> *)- <b>6aa</b> and <i>rac</i> -(6a <i>S</i> *,12b <i>R</i> *,19b <i>R</i> *)- <b>5aa</b> in CDCl <sub>3</sub> at 400 MHz. ....  | 15 |
| Figure S5. <sup>13</sup> C-NMR spectrum of <i>rac</i> -(6a <i>S</i> *,12b <i>R</i> *,19b <i>S</i> *)- <b>6aa</b> and <i>rac</i> -(6a <i>S</i> *,12b <i>R</i> *,19b <i>R</i> *)- <b>5aa</b> in CDCl <sub>3</sub> at 100 MHz. .... | 16 |
| Figure S6. NOESY spectrum of <i>rac</i> -(6a <i>S</i> *,12b <i>R</i> *,19b <i>S</i> *)- <b>6aa</b> and <i>rac</i> -(6a <i>S</i> *,12b <i>R</i> *,19b <i>R</i> *)- <b>5aa</b> in CDCl <sub>3</sub> at 400 MHz. ....               | 17 |
| Figure S7. <sup>1</sup> H-NMR spectrum of <i>rac</i> -(6a <i>S</i> *,12b <i>R</i> *,19b <i>R</i> *)- <b>7aa</b> in CDCl <sub>3</sub> at 400 MHz. ....                                                                            | 18 |
| Figure S8. <sup>13</sup> C-NMR spectrum of <i>rac</i> -(6a <i>S</i> *,12b <i>R</i> *,19b <i>R</i> *)- <b>7aa</b> in CDCl <sub>3</sub> at 100 MHz. ....                                                                           | 19 |
| Figure S9. NOESY spectrum of <i>rac</i> -(6a <i>S</i> *,12b <i>R</i> *,19b <i>R</i> *)- <b>7aa</b> in CDCl <sub>3</sub> at 400 MHz.....                                                                                          | 20 |
| Figure S10. <sup>1</sup> H-NMR spectrum of (6a <i>S</i> ,7 <i>R</i> ,12b <i>R</i> ,19b <i>S</i> )- <b>4ba</b> in CD <sub>2</sub> Cl <sub>2</sub> at 400 MHz. ....                                                                | 21 |
| Figure S11. <sup>13</sup> C-NMR spectrum of (6a <i>S</i> ,7 <i>R</i> ,12b <i>R</i> ,19b <i>S</i> )- <b>4ba</b> in CDCl <sub>3</sub> at 100 MHz.....                                                                              | 22 |
| Figure S12. <sup>1</sup> H-NMR spectrum of (6a <i>S</i> ,7 <i>R</i> ,12b <i>R</i> ,19b <i>S</i> )- <b>4ba</b> and (6a <i>S</i> ,7 <i>R</i> ,12b <i>R</i> ,19b <i>S</i> )- <b>6ba</b> in CDCl <sub>3</sub> at 400 MHz. ....       | 23 |
| Figure S13. <sup>13</sup> C-NMR spectrum of (6a <i>S</i> ,7 <i>R</i> ,12b <i>R</i> ,19b <i>S</i> )- <b>4ba</b> and (6a <i>S</i> ,7 <i>R</i> ,12b <i>R</i> ,19b <i>S</i> )- <b>6ba</b> in CDCl <sub>3</sub> at 100 MHz. ....      | 24 |
| Figure S14. NOESY spectrum of (6a <i>S</i> ,7 <i>R</i> ,12b <i>R</i> ,19b <i>S</i> )- <b>4ba</b> and (6a <i>S</i> ,7 <i>R</i> ,12b <i>R</i> ,19b <i>S</i> )- <b>6ba</b> in CDCl <sub>3</sub> at 400 MHz. ....                    | 25 |
| Figure S15. <sup>1</sup> H-NMR spectrum of (6a <i>S</i> ,7 <i>R</i> ,12b <i>R</i> ,19b <i>R</i> )- <b>5ba</b> in CDCl <sub>3</sub> at 400 MHz. ....                                                                              | 26 |
| Figure S16. <sup>13</sup> C-NMR spectrum of (6a <i>S</i> ,7 <i>R</i> ,12b <i>R</i> ,19b <i>R</i> )- <b>5ba</b> in CDCl <sub>3</sub> at 100 MHz. ....                                                                             | 27 |
| Figure S17. NOESY spectrum of (6a <i>S</i> ,7 <i>R</i> ,12b <i>R</i> ,19b <i>R</i> )- <b>5ba</b> in CDCl <sub>3</sub> at 400 MHz.....                                                                                            | 28 |
| Figure S18. <sup>1</sup> H-NMR spectrum of <i>rac</i> -(6a <i>S</i> *,12b <i>R</i> *,19b <i>R</i> *)- <b>4ca</b> in CDCl <sub>3</sub> at 400 MHz.....                                                                            | 29 |
| Figure S19. <sup>13</sup> C-NMR spectrum of <i>rac</i> -(6a <i>S</i> *,12b <i>R</i> *,19b <i>R</i> *)- <b>4ca</b> in CDCl <sub>3</sub> at 100 MHz. ....                                                                          | 30 |
| Figure S20. NOESY spectrum of <i>rac</i> -(6a <i>S</i> *,12b <i>R</i> *,19b <i>R</i> *)- <b>4ca</b> in CDCl <sub>3</sub> at 400 MHz. ....                                                                                        | 31 |
| Figure S21. <sup>1</sup> H-NMR spectrum of <i>rac</i> -(6a <i>S</i> *,12b <i>R</i> *,19b <i>S</i> *)- <b>5ca</b> in CDCl <sub>3</sub> at 400 MHz. ....                                                                           | 32 |
| Figure S22. <sup>13</sup> C-NMR spectrum of <i>rac</i> -(6a <i>S</i> *,12b <i>R</i> *,19b <i>S</i> *)- <b>5ca</b> in CDCl <sub>3</sub> at 100 MHz.....                                                                           | 33 |
| Figure S23. NOESY spectrum of <i>rac</i> -(6a <i>S</i> *,12b <i>R</i> *,19b <i>S</i> *)- <b>5ca</b> in CDCl <sub>3</sub> at 400 MHz. ....                                                                                        | 34 |
| Figure S24. <sup>1</sup> H-NMR spectrum of <i>rac</i> -(6a <i>S</i> *,12b <i>R</i> *,19b <i>R</i> *)- <b>6ca</b> in CDCl <sub>3</sub> at 400 MHz.....                                                                            | 35 |
| Figure S25. <sup>13</sup> C-NMR spectrum of <i>rac</i> -(6a <i>S</i> *,12b <i>R</i> *,19b <i>R</i> *)- <b>6ca</b> in CDCl <sub>3</sub> at 100 MHz. ....                                                                          | 36 |
| Figure S26. NOESY spectrum of <i>rac</i> -(6a <i>S</i> *,12b <i>R</i> *,19b <i>R</i> *)- <b>6ca</b> in CDCl <sub>3</sub> at 400 MHz. ....                                                                                        | 37 |
| Figure S27. <sup>1</sup> H-NMR spectrum of <i>rac</i> -(6a <i>S</i> *,12b <i>R</i> *,19b <i>S</i> *)- <b>7ca</b> in CDCl <sub>3</sub> at 400 MHz.....                                                                            | 38 |
| Figure S28. <sup>13</sup> C-NMR spectrum of <i>rac</i> -(6a <i>S</i> *,12b <i>R</i> *,19b <i>S</i> *)- <b>7ca</b> in CDCl <sub>3</sub> at 90 MHz.....                                                                            | 39 |
| Figure S29. NOESY spectrum of <i>rac</i> -(6a <i>S</i> *,12b <i>R</i> *,19b <i>S</i> *)- <b>7ca</b> in CDCl <sub>3</sub> at 400 MHz. ....                                                                                        | 40 |
| Figure S30. <sup>1</sup> H-NMR spectrum of <i>rac</i> -(6a <i>S</i> *,12b <i>R</i> *,19b <i>S</i> *)- <b>4ab</b> in CDCl <sub>3</sub> at 400 MHz.....                                                                            | 41 |
| Figure S31. <sup>13</sup> C-NMR spectrum of <i>rac</i> -(6a <i>S</i> *,12b <i>R</i> *,19b <i>S</i> *)- <b>4ab</b> in CDCl <sub>3</sub> at 100 MHz. ....                                                                          | 42 |
| Figure S32. NOESY spectrum of <i>rac</i> -(6a <i>S</i> *,12b <i>R</i> *,19b <i>S</i> *)- <b>4ab</b> in CDCl <sub>3</sub> at 400 MHz. ....                                                                                        | 43 |
| Figure S33. <sup>1</sup> H-NMR spectrum of <i>rac</i> -(6a <i>S</i> *,12b <i>R</i> *,19b <i>S</i> *)- <b>6ab</b> in CDCl <sub>3</sub> at 500 MHz.....                                                                            | 44 |
| Figure S34. <sup>13</sup> C-NMR spectrum of <i>rac</i> -(6a <i>S</i> *,12b <i>R</i> *,19b <i>S</i> *)- <b>6ab</b> in CDCl <sub>3</sub> at 100 MHz. ....                                                                          | 45 |
| Figure S35. NOESY spectrum of <i>rac</i> -(6a <i>S</i> *,12b <i>R</i> *,19b <i>S</i> *)- <b>6ab</b> in CDCl <sub>3</sub> at 400 MHz.....                                                                                         | 46 |

|                                                                                                                                                                          |    |
|--------------------------------------------------------------------------------------------------------------------------------------------------------------------------|----|
| Figure S36. <sup>1</sup> H-NMR spectrum of (6a <i>S</i> ,7 <i>R</i> ,12 <i>bR</i> ,19 <i>bS</i> )- <b>4bb</b> in CDCl <sub>3</sub> at 400 MHz.....                       | 47 |
| Figure S37. <sup>13</sup> C-NMR spectrum of (6a <i>S</i> ,7 <i>R</i> ,12 <i>bR</i> ,19 <i>bS</i> )- <b>4bb</b> in CDCl <sub>3</sub> at 100 MHz. ....                     | 48 |
| Figure S38. NOESY spectrum of (6a <i>S</i> ,7 <i>R</i> ,12 <i>bR</i> ,19 <i>bS</i> )- <b>4bb</b> in CDCl <sub>3</sub> at 400 MHz. ....                                   | 49 |
| Figure S39. <sup>1</sup> H-NMR spectrum of (6a <i>S</i> ,7 <i>R</i> ,12 <i>bR</i> ,19 <i>bS</i> )- <b>6bb</b> in CDCl <sub>3</sub> at 400 MHz.....                       | 50 |
| Figure S40. <sup>13</sup> C-NMR spectrum of (6a <i>S</i> ,7 <i>R</i> ,12 <i>bR</i> ,19 <i>bS</i> )- <b>6bb</b> in CDCl <sub>3</sub> at 100 MHz. ....                     | 51 |
| Figure S41. NOESY spectrum of (6a <i>S</i> ,7 <i>R</i> ,12 <i>bR</i> ,19 <i>bS</i> )- <b>6bb</b> in CDCl <sub>3</sub> at 400 MHz. ....                                   | 52 |
| Figure S42. <sup>1</sup> H-NMR spectrum of <i>rac</i> -(6a <i>S</i> *,7 <i>R</i> *,12 <i>bR</i> *,19 <i>bR</i> *)- <b>5bb</b> in CDCl <sub>3</sub> at 400 MHz.<br>.....  | 53 |
| Figure S43. <sup>13</sup> C-NMR spectrum of <i>rac</i> -(6a <i>S</i> *,7 <i>R</i> *,12 <i>bR</i> *,19 <i>bR</i> *)- <b>5bb</b> in CDCl <sub>3</sub> at 100 MHz.<br>..... | 54 |
| Figure S44. NOESY spectrum of <i>rac</i> -(6a <i>S</i> *,7 <i>R</i> *,12 <i>bR</i> *,19 <i>bR</i> *)- <b>5bb</b> in CDCl <sub>3</sub> at 400 MHz. ....                   | 55 |
| Figure S45. <sup>1</sup> H-NMR spectrum of <i>rac</i> -(6a <i>S</i> *,12 <i>bR</i> *,19 <i>bR</i> *)- <b>4cb</b> in CDCl <sub>3</sub> at 400 MHz. ....                   | 56 |
| Figure S46. <sup>13</sup> C-NMR spectrum of <i>rac</i> -(6a <i>S</i> *,12 <i>bR</i> *,19 <i>bR</i> *)- <b>4cb</b> in CDCl <sub>3</sub> at 100 MHz. ....                  | 57 |
| Figure S47. NOESY spectrum of <i>rac</i> -(6a <i>S</i> *,12 <i>bR</i> *,19 <i>bR</i> *)- <b>4cb</b> in CDCl <sub>3</sub> at 400 MHz. ....                                | 58 |
| Figure S48. <sup>1</sup> H-NMR spectrum of <i>rac</i> -(6a <i>S</i> *,12 <i>bR</i> *,19 <i>bR</i> *)- <b>6cb</b> in CDCl <sub>3</sub> at 400 MHz. ....                   | 59 |
| Figure S49. <sup>13</sup> C-NMR spectrum of <i>rac</i> -(6a <i>S</i> *,12 <i>bR</i> *,19 <i>bR</i> *)- <b>6cb</b> in CDCl <sub>3</sub> at 100 MHz. ....                  | 60 |
| Figure S50. NOESY spectrum of <i>rac</i> -(6a <i>S</i> *,12 <i>bR</i> *,19 <i>bR</i> *)- <b>6cb</b> in CDCl <sub>3</sub> at 400 MHz. ....                                | 61 |
| Figure S51. <sup>1</sup> H-NMR spectrum of <i>rac</i> -(6a <i>S</i> *,12 <i>bR</i> *,19 <i>bS</i> *)- <b>5cb</b> in CDCl <sub>3</sub> at 400 MHz. ....                   | 62 |
| Figure S52. <sup>13</sup> C-NMR spectrum of <i>rac</i> -(6a <i>S</i> *,12 <i>bR</i> *,19 <i>bS</i> *)- <b>5cb</b> in CDCl <sub>3</sub> at 100 MHz. ....                  | 63 |
| Figure S53. NOESY spectrum of <i>rac</i> -(6a <i>S</i> *,12 <i>bR</i> *,19 <i>bS</i> *)- <b>5cb</b> in CDCl <sub>3</sub> at 400 MHz. ....                                | 64 |
| Figure S54. <sup>1</sup> H-NMR spectrum of <i>rac</i> -(6a <i>S</i> *,12 <i>bR</i> *,19 <i>bS</i> *)- <b>4ac</b> in CDCl <sub>3</sub> at 400 MHz. ....                   | 65 |
| Figure S55. <sup>13</sup> C-NMR spectrum of <i>rac</i> -(6a <i>S</i> *,12 <i>bR</i> *,19 <i>bS</i> *)- <b>4ac</b> in CDCl <sub>3</sub> at 100 MHz. ....                  | 66 |
| Figure S56. NOESY spectrum of <i>rac</i> -(6a <i>S</i> *,12 <i>bR</i> *,19 <i>bS</i> *)- <b>4ac</b> in CDCl <sub>3</sub> at 400 MHz. ....                                | 67 |
| Figure S57. <sup>1</sup> H-NMR spectrum of <i>rac</i> -(6a <i>S</i> *,12 <i>bR</i> *,19 <i>bS</i> *)- <b>6ac</b> in CDCl <sub>3</sub> at 400 MHz. ....                   | 68 |
| Figure S58. <sup>13</sup> C-NMR spectrum of <i>rac</i> -(6a <i>S</i> *,12 <i>bR</i> *,19 <i>bS</i> *)- <b>6ac</b> in CDCl <sub>3</sub> at 100 MHz. ....                  | 69 |
| Figure S59. NOESY spectrum of <i>rac</i> -(6a <i>S</i> *,12 <i>bR</i> *,19 <i>bS</i> *)- <b>6ac</b> in CDCl <sub>3</sub> at 400 MHz. ....                                | 70 |
| Figure S60. <sup>1</sup> H-NMR spectrum of <i>rac</i> -(6a <i>S</i> *,12 <i>bR</i> *,19 <i>bR</i> *)- <b>5ac</b> in CDCl <sub>3</sub> at 400 MHz. ....                   | 71 |
| Figure S61. <sup>13</sup> C-NMR spectrum of <i>rac</i> -(6a <i>S</i> *,12 <i>bR</i> *,19 <i>bR</i> *)- <b>5ac</b> in CDCl <sub>3</sub> at 100 MHz. ....                  | 72 |
| Figure S62. NOESY spectrum of <i>rac</i> -(6a <i>S</i> *,12 <i>bR</i> *,19 <i>bR</i> *)- <b>5ac</b> in CDCl <sub>3</sub> at 400 MHz. ....                                | 73 |
| Figure S63. <sup>1</sup> H-NMR spectrum of (6a <i>S</i> ,7 <i>R</i> ,12 <i>bR</i> ,19 <i>bS</i> )- <b>4bc</b> in CDCl <sub>3</sub> at 400 MHz. ....                      | 74 |
| Figure S64. <sup>13</sup> C-NMR spectrum of (6a <i>S</i> ,7 <i>R</i> ,12 <i>bR</i> ,19 <i>bS</i> )- <b>4bc</b> in CDCl <sub>3</sub> at 100 MHz. ....                     | 75 |
| Figure S65. NOESY spectrum of (6a <i>S</i> ,7 <i>R</i> ,12 <i>bR</i> ,19 <i>bS</i> )- <b>4bc</b> in CDCl <sub>3</sub> at 400 MHz. ....                                   | 76 |
| Figure S66. <sup>1</sup> H-NMR spectrum of (6a <i>S</i> ,7 <i>R</i> ,12 <i>bR</i> ,19 <i>bS</i> )- <b>6bc</b> in CDCl <sub>3</sub> at 400 MHz. ....                      | 77 |
| Figure S67. <sup>13</sup> C-NMR spectrum of (6a <i>S</i> ,7 <i>R</i> ,12 <i>bR</i> ,19 <i>bS</i> )- <b>6bc</b> in CDCl <sub>3</sub> at 100 MHz. ....                     | 78 |
| Figure S68. NOESY spectrum of (6a <i>S</i> ,7 <i>R</i> ,12 <i>bR</i> ,19 <i>bS</i> )- <b>6bc</b> in CDCl <sub>3</sub> at 400 MHz. ....                                   | 79 |
| Figure S69. <sup>1</sup> H-NMR spectrum of (6a <i>S</i> ,7 <i>R</i> ,12 <i>bR</i> ,19 <i>bR</i> )- <b>5bc</b> in CDCl <sub>3</sub> at 400 MHz. ....                      | 80 |
| Figure S70. <sup>13</sup> C-NMR spectrum of (6a <i>S</i> ,7 <i>R</i> ,12 <i>bR</i> ,19 <i>bR</i> )- <b>5bc</b> in CDCl <sub>3</sub> at 100 MHz. ....                     | 81 |
| Figure S71. NOESY spectrum of (6a <i>S</i> ,7 <i>R</i> ,12 <i>bR</i> ,19 <i>bR</i> )- <b>5bc</b> in CDCl <sub>3</sub> at 400 MHz. ....                                   | 82 |
| Figure S72. <sup>1</sup> H-NMR spectrum of <i>rac</i> -(6a <i>S</i> *,12 <i>bR</i> *,19 <i>bR</i> *)- <b>4cc</b> in CDCl <sub>3</sub> at 400 MHz. ....                   | 83 |
| Figure S73. <sup>13</sup> C-NMR spectrum of <i>rac</i> -(6a <i>S</i> *,12 <i>bR</i> *,19 <i>bR</i> *)- <b>4cc</b> in CDCl <sub>3</sub> at 100 MHz. ....                  | 84 |
| Figure S74. NOESY spectrum of <i>rac</i> -(6a <i>S</i> *,12 <i>bR</i> *,19 <i>bR</i> *)- <b>4cc</b> in CDCl <sub>3</sub> at 400 MHz. ....                                | 85 |
| Figure S75. <sup>1</sup> H-NMR spectrum of <i>rac</i> -(6a <i>S</i> *,12 <i>bR</i> *,19 <i>bR</i> *)- <b>6cc</b> in CDCl <sub>3</sub> at 400 MHz. ....                   | 86 |
| Figure S76. <sup>13</sup> C-NMR spectrum of <i>rac</i> -(6a <i>S</i> *,12 <i>bR</i> *,19 <i>bR</i> *)- <b>6cc</b> in CDCl <sub>3</sub> at 100 MHz. ....                  | 87 |
| Figure S77. NOESY spectrum of <i>rac</i> -(6a <i>S</i> *,12 <i>bR</i> *,19 <i>bR</i> *)- <b>6cc</b> in CDCl <sub>3</sub> at 400 MHz. ....                                | 88 |

|                                                                                                                                                                                                                                                                                                                    |     |
|--------------------------------------------------------------------------------------------------------------------------------------------------------------------------------------------------------------------------------------------------------------------------------------------------------------------|-----|
| Figure S78. <sup>1</sup> H-NMR spectrum of <i>rac</i> -(6a <i>S</i> *,12b <i>R</i> *,19b <i>S</i> *)- <b>5cc</b> in CDCl <sub>3</sub> at 400 MHz. ....                                                                                                                                                             | 89  |
| Figure S79. <sup>13</sup> C-NMR spectrum of <i>rac</i> -(6a <i>S</i> *,12b <i>R</i> *,19b <i>S</i> *)- <b>5cc</b> in CDCl <sub>3</sub> at 100 MHz. ....                                                                                                                                                            | 90  |
| Figure S80. NOESY spectrum of <i>rac</i> -(6a <i>S</i> *,12b <i>R</i> *,19b <i>S</i> *)- <b>5cc</b> in CDCl <sub>3</sub> at 400 MHz.....                                                                                                                                                                           | 91  |
| Figure S81. <sup>1</sup> H-NMR spectrum of <i>rac</i> -(6a <i>S</i> *,12b <i>R</i> *,19b <i>S</i> *)- <b>4dc</b> in CDCl <sub>3</sub> at 400 MHz.....                                                                                                                                                              | 92  |
| Figure S82. <sup>13</sup> C-NMR spectrum of <i>rac</i> -(6a <i>S</i> *,12b <i>R</i> *,19b <i>S</i> *)- <b>4dc</b> in CDCl <sub>3</sub> at 100 MHz.....                                                                                                                                                             | 93  |
| Figure S83. NOESY spectrum of <i>rac</i> -(6a <i>S</i> *,12b <i>R</i> *,19b <i>S</i> *)- <b>4dc</b> in CDCl <sub>3</sub> at 400 MHz. ....                                                                                                                                                                          | 94  |
| Figure S84. <sup>1</sup> H-NMR spectrum of <i>rac</i> -(6a <i>S</i> *,12b <i>R</i> *,19b <i>S</i> *)- <b>4ec</b> in CDCl <sub>3</sub> at 400 MHz. ....                                                                                                                                                             | 95  |
| Figure S85. <sup>13</sup> C-NMR spectrum of <i>rac</i> -(6a <i>S</i> *,12b <i>R</i> *,19b <i>S</i> *)- <b>4ec</b> in CDCl <sub>3</sub> at 100 MHz. ....                                                                                                                                                            | 96  |
| Figure S86. NOESY spectrum of <i>rac</i> -(6a <i>S</i> *,12b <i>R</i> *,19b <i>S</i> *)- <b>4ec</b> in CDCl <sub>3</sub> at 400 MHz.....                                                                                                                                                                           | 97  |
| Figure S87. <sup>1</sup> H-NMR spectrum of <i>rac</i> -(6a <i>S</i> *,12b <i>R</i> *,19b <i>R</i> *)- <b>4ad</b> , <i>rac</i> -(6a <i>S</i> *,12b <i>R</i> *,19b <i>R</i> *)- <b>6ad</b> and <i>rac</i> -(6a <i>S</i> *,12b <i>R</i> *,19b <i>S</i> *)- <b>5ad</b> in DMSO- <i>d</i> <sub>6</sub> at 400 MHz. .... | 98  |
| Figure S88. <sup>1</sup> H-NMR spectrum of <i>rac</i> -(6a <i>S</i> *,12b <i>R</i> *,19b <i>R</i> *)- <b>4ad</b> , <i>rac</i> -(6a <i>S</i> *,12b <i>R</i> *,19b <i>R</i> *)- <b>6ad</b> and <i>rac</i> -(6a <i>S</i> *,12b <i>R</i> *,19b <i>S</i> *)- <b>5ad</b> in DMSO- <i>d</i> <sub>6</sub> at 400 MHz. .... | 99  |
| Figure S89. <sup>1</sup> H-NMR spectrum of <i>rac</i> -(6a <i>S</i> *,12b <i>R</i> *,19b <i>R</i> *)- <b>4ad</b> , <i>rac</i> -(6a <i>S</i> *,12b <i>R</i> *,19b <i>R</i> *)- <b>6ad</b> and <i>rac</i> -(6a <i>S</i> *,12b <i>R</i> *,19b <i>S</i> *)- <b>5ad</b> in DMSO- <i>d</i> <sub>6</sub> at 400 MHz. .... | 100 |
| Figure S90. <sup>1</sup> H-NMR spectrum of <i>rac</i> -(6a <i>S</i> *,7 <i>R</i> *,12b <i>R</i> *,19b <i>S</i> *)- <b>4bd</b> in DMSO- <i>d</i> <sub>6</sub> at 400 MHz.....                                                                                                                                       | 101 |
| Figure S91. <sup>13</sup> C-NMR spectrum of <i>rac</i> -(6a <i>S</i> *,7 <i>R</i> *,12b <i>R</i> *,19b <i>S</i> *)- <b>4bd</b> in DMSO- <i>d</i> <sub>6</sub> at 100 MHz.....                                                                                                                                      | 102 |
| Figure S92. NOESY spectrum of <i>rac</i> -(6a <i>S</i> *,7 <i>R</i> *,12b <i>R</i> *,19b <i>S</i> *)- <b>4bd</b> in DMSO- <i>d</i> <sub>6</sub> at 400 MHz.....                                                                                                                                                    | 103 |
| Figure S93. <sup>1</sup> H-NMR spectrum of <i>rac</i> -(6a <i>S</i> *,7 <i>R</i> *,12b <i>R</i> *,19b <i>S</i> *)- <b>5bd</b> in DMSO- <i>d</i> <sub>6</sub> at 400 MHz.....                                                                                                                                       | 104 |
| Figure S94. <sup>13</sup> C-NMR spectrum of <i>rac</i> -(6a <i>S</i> *,7 <i>R</i> *,12b <i>R</i> *,19b <i>S</i> *)- <b>5bd</b> in DMSO- <i>d</i> <sub>6</sub> at 100 MHz.....                                                                                                                                      | 105 |
| Figure S95. NOESY spectrum of <i>rac</i> -(6a <i>S</i> *,7 <i>R</i> *,12b <i>R</i> *,19b <i>S</i> *)- <b>5bd</b> in DMSO- <i>d</i> <sub>6</sub> at 400 MHz.....                                                                                                                                                    | 106 |
| Figure S96. <sup>1</sup> H-NMR spectrum of <i>rac</i> -(6a <i>S</i> *,12b <i>R</i> *,19b <i>R</i> *)- <b>4cd</b> in CDCl <sub>3</sub> at 400 MHz. ....                                                                                                                                                             | 107 |
| Figure S97. <sup>13</sup> C-NMR spectrum of <i>rac</i> -(6a <i>S</i> *,12b <i>R</i> *,19b <i>R</i> *)- <b>4cd</b> in CDCl <sub>3</sub> at 100 MHz. ...                                                                                                                                                             | 108 |
| Figure S98. NOESY spectrum of <i>rac</i> -(6a <i>S</i> *,12b <i>R</i> *,19b <i>R</i> *)- <b>4cd</b> in CDCl <sub>3</sub> at 400 MHz.....                                                                                                                                                                           | 109 |
| Figure S99. <sup>1</sup> H-NMR spectrum of <i>rac</i> -(6a <i>S</i> *,12b <i>R</i> *,17b <i>S</i> *)- <b>4ae</b> in CDCl <sub>3</sub> at 400 MHz. ....                                                                                                                                                             | 110 |
| Figure S100. <sup>13</sup> C-NMR spectrum of <i>rac</i> -(6a <i>S</i> *,12b <i>R</i> *,17b <i>S</i> *)- <b>4ae</b> in CDCl <sub>3</sub> at 100 MHz...                                                                                                                                                              | 111 |
| Figure S101. NOESY spectrum of <i>rac</i> -(6a <i>S</i> *,12b <i>R</i> *,17b <i>S</i> *)- <b>4ae</b> in CDCl <sub>3</sub> at 400 MHz. ....                                                                                                                                                                         | 112 |
| Figure S102. <sup>1</sup> H-NMR spectrum of <i>rac</i> -(6a <i>S</i> *,12b <i>R</i> *,17b <i>S</i> *)- <b>6ae</b> in CDCl <sub>3</sub> at 400 MHz. ...                                                                                                                                                             | 113 |
| Figure S103. <sup>13</sup> C-NMR spectrum of <i>rac</i> -(6a <i>S</i> *,12b <i>R</i> *,17b <i>S</i> *)- <b>6ae</b> in CDCl <sub>3</sub> at 100 MHz...                                                                                                                                                              | 114 |
| Figure S104. NOESY spectrum of <i>rac</i> -(6a <i>S</i> *,12b <i>R</i> *,17b <i>S</i> *)- <b>6ae</b> in CDCl <sub>3</sub> at 400 MHz. ....                                                                                                                                                                         | 115 |
| Figure S105. <sup>1</sup> H-NMR spectrum of <i>rac</i> -(6a <i>S</i> *,12b <i>R</i> *,17b <i>R</i> *)- <b>5ae</b> in CDCl <sub>3</sub> at 400 MHz....                                                                                                                                                              | 116 |
| Figure S106. <sup>13</sup> C-NMR spectrum of <i>rac</i> -(6a <i>S</i> *,12b <i>R</i> *,17b <i>R</i> *)- <b>5ae</b> in CDCl <sub>3</sub> at 100 MHz...                                                                                                                                                              | 117 |
| Figure S107. NOESY spectrum of <i>rac</i> -(6a <i>S</i> *,12b <i>R</i> *,17b <i>R</i> *)- <b>5ae</b> in CDCl <sub>3</sub> at 400 MHz. ....                                                                                                                                                                         | 118 |
| Figure S108. <sup>1</sup> H-NMR spectrum of <i>rac</i> -(6a <i>S</i> *,12b <i>R</i> *,17b <i>R</i> *)- <b>7ae</b> in CDCl <sub>3</sub> at 400 MHz....                                                                                                                                                              | 119 |
| Figure S109. <sup>1</sup> H-NMR spectrum of <i>rac</i> -(6a <i>S</i> *,12b <i>R</i> *,17b <i>R</i> *)- <b>7ae</b> in CDCl <sub>3</sub> at 90 MHz.....                                                                                                                                                              | 120 |
| Figure S110. NOESY spectrum of <i>rac</i> -(6a <i>S</i> *,12b <i>R</i> *,17b <i>R</i> *)- <b>7ae</b> in CDCl <sub>3</sub> at 400 MHz. ....                                                                                                                                                                         | 121 |
| Figure S111. <sup>1</sup> H-NMR spectrum of (6a <i>S</i> ,7 <i>R</i> ,12b <i>R</i> ,17b <i>S</i> )- <b>4be</b> in CDCl <sub>3</sub> at 400 MHz. ....                                                                                                                                                               | 122 |
| Figure S112. <sup>13</sup> C-NMR spectrum of (6a <i>S</i> ,7 <i>R</i> ,12b <i>R</i> ,17b <i>S</i> )- <b>4be</b> in CDCl <sub>3</sub> at 100 MHz.....                                                                                                                                                               | 123 |

|                                                                                                                                                                       |     |
|-----------------------------------------------------------------------------------------------------------------------------------------------------------------------|-----|
| Figure S113. NOESY spectrum of (6a <i>S</i> ,7 <i>R</i> ,12b <i>R</i> ,17b <i>S</i> )- <b>4be</b> in CDCl <sub>3</sub> at 400 MHz. ....                               | 124 |
| Figure S114. <sup>1</sup> H-NMR spectrum of (6a <i>S</i> ,7 <i>R</i> ,12b <i>R</i> ,17b <i>S</i> )- <b>6be</b> in CDCl <sub>3</sub> at 400 MHz. ....                  | 125 |
| Figure S115. <sup>13</sup> C-NMR spectrum of (6a <i>S</i> ,7 <i>R</i> ,12b <i>R</i> ,17b <i>S</i> )- <b>6be</b> in CDCl <sub>3</sub> at 100 MHz. ....                 | 126 |
| Figure S116. NOESY spectrum of (6a <i>S</i> ,7 <i>R</i> ,12b <i>R</i> ,17b <i>S</i> )- <b>6be</b> in CDCl <sub>3</sub> at 400 MHz. ....                               | 127 |
| Figure S117. <sup>1</sup> H-NMR spectrum of (6a <i>S</i> ,7 <i>R</i> ,12b <i>R</i> ,17b <i>R</i> )- <b>5be</b> in CDCl <sub>3</sub> at 400 MHz. ....                  | 128 |
| Figure S118. <sup>13</sup> C-NMR spectrum of (6a <i>S</i> ,7 <i>R</i> ,12b <i>R</i> ,17b <i>R</i> )- <b>5be</b> in CDCl <sub>3</sub> at 100 MHz. ....                 | 129 |
| Figure S119. NOESY spectrum of (6a <i>S</i> ,7 <i>R</i> ,12b <i>R</i> ,17b <i>R</i> )- <b>5be</b> in CDCl <sub>3</sub> at 400 MHz. ....                               | 130 |
| Figure S120. <sup>1</sup> H-NMR spectrum of <i>rac</i> -(6a <i>S</i> *,12b <i>R</i> *,17b <i>R</i> *)- <b>4ce</b> in CDCl <sub>3</sub> at 400 MHz. ....               | 131 |
| Figure S121. <sup>13</sup> C-NMR spectrum of <i>rac</i> -(6a <i>S</i> *,12b <i>R</i> *,17b <i>R</i> *)- <b>4ce</b> in CDCl <sub>3</sub> at 100 MHz. ....              | 132 |
| Figure S122. NOESY spectrum of <i>rac</i> -(6a <i>S</i> *,12b <i>R</i> *,17b <i>R</i> *)- <b>4ce</b> in CDCl <sub>3</sub> at 400 MHz. ....                            | 133 |
| Figure S123. <sup>1</sup> H-NMR spectrum of <i>rac</i> -(6a <i>S</i> *,12b <i>R</i> *,17b <i>R</i> *)- <b>6ce</b> in CDCl <sub>3</sub> at 400 MHz. ....               | 134 |
| Figure S124. <sup>13</sup> C-NMR spectrum of <i>rac</i> -(6a <i>S</i> *,12b <i>R</i> *,17b <i>R</i> *)- <b>6ce</b> in CDCl <sub>3</sub> at 100 MHz. ....              | 135 |
| Figure S125. NOESY spectrum of <i>rac</i> -(6a <i>S</i> *,12b <i>R</i> *,17b <i>R</i> *)- <b>6ce</b> in CDCl <sub>3</sub> at 400 MHz. ....                            | 136 |
| Figure S126. <sup>1</sup> H-NMR spectrum of <i>rac</i> -(6a <i>S</i> *,12b <i>R</i> *,17b <i>S</i> *)- <b>4af</b> in CDCl <sub>3</sub> at 400 MHz. ....               | 137 |
| Figure S127. <sup>13</sup> C-NMR spectrum of <i>rac</i> -(6a <i>S</i> *,12b <i>R</i> *,17b <i>S</i> *)- <b>4af</b> in CDCl <sub>3</sub> at 100 MHz. ....              | 138 |
| Figure S128. NOESY spectrum of <i>rac</i> -(6a <i>S</i> *,12b <i>R</i> *,17b <i>S</i> *)- <b>4af</b> in CDCl <sub>3</sub> at 400 MHz. ....                            | 139 |
| Figure S129. <sup>1</sup> H-NMR spectrum of <i>rac</i> -(6a <i>S</i> *,12b <i>R</i> *,17b <i>S</i> *)- <b>6af</b> in CDCl <sub>3</sub> at 400 MHz. ....               | 140 |
| Figure S130. <sup>13</sup> C-NMR spectrum of <i>rac</i> -(6a <i>S</i> *,12b <i>R</i> *,17b <i>S</i> *)- <b>6af</b> in CDCl <sub>3</sub> at 100 MHz. ....              | 141 |
| Figure S131. NOESY spectrum of <i>rac</i> -(6a <i>S</i> *,12b <i>R</i> *,17b <i>S</i> *)- <b>6af</b> in CDCl <sub>3</sub> at 400 MHz. ....                            | 142 |
| Figure S132. <sup>1</sup> H-NMR spectrum of <i>rac</i> -(6a <i>S</i> *,12b <i>R</i> *,17b <i>R</i> *)- <b>5af</b> in CDCl <sub>3</sub> at 400 MHz. ....               | 143 |
| Figure S133. <sup>13</sup> C-NMR spectrum of <i>rac</i> -(6a <i>S</i> *,12b <i>R</i> *,17b <i>R</i> *)- <b>5af</b> in CDCl <sub>3</sub> at 100 MHz. ....              | 144 |
| Figure S134. NOESY spectrum of <i>rac</i> -(6a <i>S</i> *,12b <i>R</i> *,17b <i>R</i> *)- <b>5af</b> in CDCl <sub>3</sub> at 400 MHz. ....                            | 145 |
| Figure S135. <sup>1</sup> H-NMR spectrum of <i>rac</i> -(6a <i>S</i> *,12b <i>R</i> *,17b <i>R</i> *)- <b>7af</b> in CDCl <sub>3</sub> at 400 MHz. ....               | 146 |
| Figure S136. <sup>13</sup> C-NMR spectrum of <i>rac</i> -(6a <i>S</i> *,12b <i>R</i> *,17b <i>R</i> *)- <b>7af</b> in CDCl <sub>3</sub> at 90 MHz. ....               | 147 |
| Figure S137. NOESY spectrum of <i>rac</i> -(6a <i>S</i> *,12b <i>R</i> *,17b <i>R</i> *)- <b>7af</b> in CDCl <sub>3</sub> at 400 MHz. ....                            | 148 |
| Figure S138. <sup>1</sup> H-NMR spectrum of <i>rac</i> -(6a <i>S</i> *,7 <i>R</i> *,12b <i>R</i> *,19b <i>S</i> *)- <b>4bf</b> in CDCl <sub>3</sub> at 400 MHz. ....  | 149 |
| Figure S139. <sup>13</sup> C-NMR spectrum of <i>rac</i> -(6a <i>S</i> *,7 <i>R</i> *,12b <i>R</i> *,19b <i>S</i> *)- <b>4bf</b> in CDCl <sub>3</sub> at 100 MHz. .... | 150 |
| Figure S140. NOESY spectrum of <i>rac</i> -(6a <i>S</i> *,7 <i>R</i> *,12b <i>R</i> *,19b <i>S</i> *)- <b>4bf</b> in CDCl <sub>3</sub> at 400 MHz. ....               | 151 |
| Figure S141. <sup>1</sup> H-NMR spectrum of <i>rac</i> -(6a <i>S</i> *,7 <i>R</i> *,12b <i>R</i> *,19b <i>S</i> *)- <b>6bf</b> in CDCl <sub>3</sub> at 400 MHz. ....  | 152 |
| Figure S142. <sup>13</sup> C-NMR spectrum of <i>rac</i> -(6a <i>S</i> *,7 <i>R</i> *,12b <i>R</i> *,19b <i>S</i> *)- <b>6bf</b> in CDCl <sub>3</sub> at 100 MHz. .... | 153 |
| Figure S143. NOESY spectrum of <i>rac</i> -(6a <i>S</i> *,7 <i>R</i> *,12b <i>R</i> *,19b <i>S</i> *)- <b>6bf</b> in CDCl <sub>3</sub> at 400 MHz. ....               | 154 |
| Figure S144. <sup>1</sup> H-NMR spectrum of <i>rac</i> -(6a <i>S</i> *,7 <i>R</i> *,12b <i>R</i> *,19b <i>R</i> *)- <b>5bf</b> in CDCl <sub>3</sub> at 400 MHz. ....  | 155 |
| Figure S145. <sup>13</sup> C-NMR spectrum of <i>rac</i> -(6a <i>S</i> *,7 <i>R</i> *,12b <i>R</i> *,19b <i>R</i> *)- <b>5bf</b> in CDCl <sub>3</sub> at 100 MHz. .... | 156 |
| Figure S146. NOESY spectrum of <i>rac</i> -(6a <i>S</i> *,7 <i>R</i> *,12b <i>R</i> *,19b <i>R</i> *)- <b>5bf</b> in CDCl <sub>3</sub> at 400 MHz. ....               | 157 |
| Figure S147. <sup>1</sup> H-NMR spectrum of <i>rac</i> -(6a <i>S</i> *,12b <i>R</i> *,17b <i>R</i> *)- <b>4cf</b> in CDCl <sub>3</sub> at 400 MHz. ....               | 158 |

|                                                                                                                                                                                                                                                                     |     |
|---------------------------------------------------------------------------------------------------------------------------------------------------------------------------------------------------------------------------------------------------------------------|-----|
| Figure S148. <sup>13</sup> H-NMR spectrum of <i>rac</i> -(6a <i>S</i> *,12b <i>R</i> *,17b <i>R</i> *)- <b>4cf</b> in CDCl <sub>3</sub> at 100 MHz...                                                                                                               | 159 |
| Figure S149. <sup>1</sup> H-NMR spectrum of <i>rac</i> -(6a <i>S</i> *,10a <i>S</i> *,15b <i>S</i> *)- <b>10aa</b> in CDCl <sub>3</sub> at 400 MHz. .                                                                                                               | 160 |
| Figure S150. <sup>13</sup> C-NMR spectrum of <i>rac</i> -(6a <i>S</i> *,10a <i>S</i> *,15b <i>S</i> *)- <b>10aa</b> in CDCl <sub>3</sub> at 100 MHz. .                                                                                                              | 161 |
| Figure S151. NOESY spectrum of <i>rac</i> -(6a <i>S</i> *,10a <i>S</i> *,15b <i>S</i> *)- <b>10aa</b> in CDCl <sub>3</sub> at 400 MHz....                                                                                                                           | 162 |
| Figure S152. <sup>1</sup> H-NMR spectrum of <i>rac</i> -(6a <i>S</i> *,10a <i>S</i> *,15b <i>S</i> *)- <b>10ab</b> in CDCl <sub>3</sub> at 400 MHz. .                                                                                                               | 163 |
| Figure S153. <sup>13</sup> C-NMR spectrum of <i>rac</i> -(6a <i>S</i> *,10a <i>S</i> *,15b <i>S</i> *)- <b>10ab</b> in CDCl <sub>3</sub> at 100 MHz. .                                                                                                              | 164 |
| Figure S154. NOESY spectrum of <i>rac</i> -(6a <i>S</i> *,10a <i>S</i> *,15b <i>S</i> *)- <b>10ab</b> in CDCl <sub>3</sub> at 400 MHz....                                                                                                                           | 165 |
| Figure S155. <sup>1</sup> H-NMR spectrum of <i>rac</i> -(6a <i>S</i> *,10a <i>S</i> *,15b <i>S</i> *)- <b>10ac</b> in CDCl <sub>3</sub> at 400 MHz... .                                                                                                             | 166 |
| Figure S156. <sup>13</sup> C-NMR spectrum of <i>rac</i> -(6a <i>S</i> *,10a <i>S</i> *,15b <i>S</i> *)- <b>10ac</b> in CDCl <sub>3</sub> at 100 MHz..                                                                                                               | 167 |
| Figure S157. NOESY spectrum of <i>rac</i> -(6a <i>S</i> *,10a <i>S</i> *,15b <i>S</i> *)- <b>10ac</b> in CDCl <sub>3</sub> at 400 MHz....                                                                                                                           | 168 |
| Figure S158. <sup>1</sup> H-NMR spectrum of <i>rac</i> -(6a <i>S</i> *,10a <i>S</i> *,15b <i>S</i> *)- <b>10bc</b> in CDCl <sub>3</sub> at 400 MHz. .                                                                                                               | 169 |
| Figure S159. <sup>13</sup> C-NMR spectrum of <i>rac</i> -(6a <i>S</i> *,10a <i>S</i> *,15b <i>S</i> *)- <b>10bc</b> in CDCl <sub>3</sub> at 100 MHz. .                                                                                                              | 170 |
| Figure S160. NOESY spectrum of <i>rac</i> -(6a <i>S</i> *,10a <i>S</i> *,15b <i>S</i> *)- <b>10bc</b> in CDCl <sub>3</sub> at 400 MHz....                                                                                                                           | 171 |
| Figure S161. <sup>1</sup> H-NMR spectrum of <i>rac</i> -(6a <i>S</i> *,10a <i>S</i> *,15b <i>S</i> *)- <b>10bd</b> in DMSO- <i>d</i> <sub>6</sub> at 400 MHz.<br>.....                                                                                              | 172 |
| Figure S162. <sup>13</sup> C-NMR spectrum of <i>rac</i> -(6a <i>S</i> *,10a <i>S</i> *,15b <i>S</i> *)- <b>10bd</b> in DMSO- <i>d</i> <sub>6</sub> at 100 MHz.<br>.....                                                                                             | 173 |
| Figure S169. NOESY spectrum of <i>rac</i> -(6a <i>S</i> *,10a <i>S</i> *,15b <i>S</i> *)- <b>10bd</b> in DMSO- <i>d</i> <sub>6</sub> at 400 MHz.<br>.....                                                                                                           | 174 |
| Figure S164. <sup>1</sup> H-NMR spectrum of <i>rac</i> -(6a <i>S</i> *,10a <i>S</i> *,15b <i>S</i> *)- <b>10ae</b> in CDCl <sub>3</sub> at 400 MHz... .                                                                                                             | 175 |
| Figure S165. <sup>13</sup> C-NMR spectrum of <i>rac</i> -(6a <i>S</i> *,10a <i>S</i> *,15b <i>S</i> *)- <b>10ae</b> in CDCl <sub>3</sub> at 100 MHz..                                                                                                               | 176 |
| Figure S166. NOESY spectrum of <i>rac</i> -(6a <i>S</i> *,10a <i>S</i> *,15b <i>S</i> *)- <b>10ae</b> in CDCl <sub>3</sub> at 400 MHz....                                                                                                                           | 177 |
| Figure S167. <sup>1</sup> H-NMR spectrum of <i>rac</i> -(6a <i>S</i> *,10a <i>S</i> *,15b <i>S</i> *)- <b>10be</b> in CDCl <sub>3</sub> at 400 MHz. .                                                                                                               | 178 |
| Figure S168. <sup>13</sup> C-NMR spectrum of <i>rac</i> -(6a <i>S</i> *,10a <i>S</i> *,15b <i>S</i> *)- <b>10be</b> in CDCl <sub>3</sub> at 100 MHz. .                                                                                                              | 179 |
| Figure S169. NOESY spectrum of <i>rac</i> -(6a <i>S</i> *,10a <i>S</i> *,15b <i>S</i> *)- <b>10be</b> in CDCl <sub>3</sub> at 400 MHz....                                                                                                                           | 180 |
| Figure S170. ECD spectrum of (6a <i>S</i> ,7 <i>R</i> ,12b <i>R</i> ,17b <i>S</i> )- <b>4ba</b> in MeCN. ....                                                                                                                                                       | 181 |
| Figure S171. ECD spectrum of (6a <i>S</i> ,7 <i>R</i> ,12b <i>R</i> ,17b <i>R</i> )- <b>5ba</b> in MeCN. ....                                                                                                                                                       | 181 |
| Figure S172. ECD spectrum of (6a <i>S</i> ,7 <i>R</i> ,12b <i>R</i> ,17b <i>S</i> )- <b>4bb</b> in MeCN. ....                                                                                                                                                       | 182 |
| Figure S173. ECD spectrum of (6a <i>S</i> ,7 <i>R</i> ,12b <i>R</i> ,17b <i>S</i> )- <b>6bb</b> in MeCN. ....                                                                                                                                                       | 182 |
| Figure S174. ECD spectrum of (6a <i>S</i> ,7 <i>R</i> ,12b <i>R</i> ,17b <i>R</i> )- <b>5bb</b> in MeCN. ....                                                                                                                                                       | 183 |
| Figure S175. ECD spectrum of (6a <i>S</i> ,7 <i>R</i> ,12b <i>R</i> ,17b <i>S</i> )- <b>4bc</b> in MeCN. ....                                                                                                                                                       | 183 |
| Figure S176. ECD spectrum of (6a <i>S</i> ,7 <i>R</i> ,12b <i>R</i> ,17b <i>S</i> )- <b>6bc</b> in MeCN. ....                                                                                                                                                       | 184 |
| Figure S177. ECD spectrum of (6a <i>S</i> ,7 <i>R</i> ,12b <i>R</i> ,17b <i>R</i> )- <b>5bc</b> in MeCN. ....                                                                                                                                                       | 184 |
| Figure S178. ECD spectrum of (6a <i>S</i> ,7 <i>R</i> ,12b <i>R</i> ,17b <i>S</i> )- <b>4be</b> in MeCN. ....                                                                                                                                                       | 185 |
| Figure S179. ECD spectrum of (6a <i>S</i> ,7 <i>R</i> ,12b <i>R</i> ,17b <i>S</i> )- <b>6be</b> in MeCN. ....                                                                                                                                                       | 185 |
| Figure S180. ECD spectrum of (6a <i>S</i> ,7 <i>R</i> ,12b <i>R</i> ,17b <i>R</i> )- <b>5be</b> in MeCN. ....                                                                                                                                                       | 186 |
| Figure S181. On-line HPLC-ECD spectra of (6a <i>S</i> ,12b <i>R</i> ,17b <i>S</i> )- <b>4aa</b> (red) and<br>(6a <i>R</i> ,12b <i>S</i> ,17b <i>R</i> )- <b>4aa</b> (black) in hexane/dichloromethane/methanol 50:45:5. ....                                        | 187 |
| Figure S182. On-line HPLC-ECD spectrum of (6a <i>S</i> ,12b <i>R</i> ,17b <i>S</i> )- <b>4aa</b> (red) in<br>hexane/dichloromethane/methanol 50:45:5 and ECD spectrum of (6a <i>S</i> ,7 <i>R</i> ,12b <i>R</i> ,17b <i>S</i> )- <b>4ba</b><br>(blue) in MeCN. .... | 187 |
| Figure S183. On-line HPLC-ECD spectra of first (black) and second (red) eluting enantiomer<br>of <i>rac</i> -(6a <i>S</i> *,12b <i>R</i> *,17b <i>R</i> *)- <b>5aa</b> in hexane/dichloromethane/methanol 30:63:7. ....                                             | 188 |

|                                                                                                                                                                                                                                                                   |     |
|-------------------------------------------------------------------------------------------------------------------------------------------------------------------------------------------------------------------------------------------------------------------|-----|
| Figure S184. On-line HPLC-ECD spectra of first (black) and second (red) eluting enantiomer of <i>rac</i> -(6a <i>S</i> *,12b <i>R</i> *,17b <i>S</i> *)- <b>6aa</b> in hexane/dichloromethane/methanol 30:63:7. ....                                              | 188 |
| Figure S185. On-line HPLC-ECD spectra of first (black) and second (red) eluting enantiomer of <i>rac</i> -(6a <i>S</i> *,12b <i>R</i> *,17b <i>R</i> *)- <b>7aa</b> in hexane/dichloromethane/methanol 30:63:7.....                                               | 189 |
| Figure S186. On-line HPLC-ECD spectra of (6a <i>S</i> ,12b <i>R</i> ,17b <i>S</i> )- <b>4ab</b> (red) and (6a <i>R</i> ,12b <i>S</i> ,17b <i>R</i> )- <b>4ab</b> (black) in hexane/dichloromethane/methanol 50:45:5. ....                                         | 189 |
| Figure S187. On-line HPLC-ECD spectrum of (6a <i>S</i> ,12b <i>R</i> ,17b <i>S</i> )- <b>4ab</b> (red) in hexane/dichloromethane/methanol 50:45:5 and ECD spectrum of (6a <i>S</i> ,7 <i>R</i> ,12b <i>R</i> ,17b <i>S</i> )- <b>4bb</b> (blue) in MeCN. ....     | 190 |
| Figure S188. On-line HPLC-ECD spectra of (6a <i>S</i> ,12b <i>R</i> ,17b <i>S</i> )- <b>6ab</b> (red) and (6a <i>R</i> ,12b <i>S</i> ,17b <i>R</i> )- <b>6ab</b> (black) in hexane/dichloromethane/methanol 50:45:5. ....                                         | 190 |
| Figure S189. On-line HPLC-ECD spectrum of (6a <i>S</i> ,12b <i>R</i> ,17b <i>S</i> )- <b>6ab</b> (red) in hexane/dichloromethane/methanol 50:45:5 and ECD spectrum of (6a <i>S</i> ,7 <i>R</i> ,12b <i>R</i> ,17b <i>S</i> )- <b>6bb</b> (blue) in MeCN. ....     | 191 |
| Figure S190. On-line HPLC-ECD spectra of (6a <i>S</i> ,12b <i>R</i> ,17b <i>S</i> )- <b>4ac</b> (red) and (6a <i>R</i> ,12b <i>S</i> ,17b <i>R</i> )- <b>4ac</b> (black) in hexane/dichloromethane/methanol 50:45:5.....                                          | 191 |
| Figure S191. On-line HPLC-ECD spectrum of (6a <i>S</i> ,12b <i>R</i> ,17b <i>S</i> )- <b>4ac</b> (red) in hexane/dichloromethane/methanol 50:45:5 and ECD spectrum of (6a <i>S</i> ,7 <i>R</i> ,12b <i>R</i> ,17b <i>S</i> )- <b>4bc</b> (blue) in MeCN. ....     | 192 |
| Figure S192. On-line HPLC-ECD spectra of (6a <i>S</i> ,12b <i>R</i> ,17b <i>S</i> )- <b>6ac</b> (red) and (6a <i>R</i> ,12b <i>S</i> ,17b <i>R</i> )- <b>6ac</b> (black) in hexane/dichloromethane/methanol 50:45:5.....                                          | 192 |
| Figure S193. On-line HPLC-ECD spectrum of (6a <i>S</i> ,12b <i>R</i> ,17b <i>S</i> )- <b>6ac</b> (red) in hexane/dichloromethane/methanol 50:45:5 and ECD spectrum of (6a <i>S</i> ,7 <i>R</i> ,12b <i>R</i> ,17b <i>S</i> )- <b>6bc</b> (blue) in MeCN. ....     | 193 |
| Figure S194. On-line HPLC-ECD spectra of (6a <i>S</i> ,12b <i>R</i> ,17b <i>R</i> )- <b>5ac</b> (black) and (6a <i>R</i> ,12b <i>S</i> ,17b <i>S</i> )- <b>5ac</b> (red) in hexane/dichloromethane/methanol 30:63:7.....                                          | 193 |
| Figure S195. On-line HPLC-ECD spectrum of (6a <i>S</i> ,12b <i>R</i> ,17b <i>R</i> )- <b>5ac</b> (red) in hexane/dichloromethane/methanol 30:63:7 and ECD spectrum of (6a <i>S</i> ,7 <i>R</i> ,12b <i>R</i> ,17b <i>R</i> )- <b>5bc</b> (blue) in MeCN. ....     | 194 |
| Figure S196. On-line HPLC-ECD spectra of (6a <i>S</i> ,12b <i>R</i> ,17b <i>S</i> )- <b>4dc</b> (red) and (6a <i>R</i> ,12b <i>S</i> ,17b <i>R</i> )- <b>4dc</b> (black) in hexane/dichloromethane/methanol 70:27:3. ....                                         | 194 |
| Figure S197. On-line HPLC-ECD spectra of (6a <i>S</i> ,12b <i>R</i> ,17b <i>S</i> )- <b>4ec</b> (red) and (6a <i>R</i> ,12b <i>S</i> ,17b <i>R</i> )- <b>4ec</b> (black) in hexane/dichloromethane/methanol 80:18:2. ....                                         | 195 |
| Figure S198. On-line HPLC-ECD spectra of (6a <i>S</i> ,12b <i>R</i> ,17b <i>S</i> )- <b>4ac</b> (red), (6a <i>R</i> ,12b <i>S</i> ,17b <i>R</i> )- <b>4ec</b> (blue) and (6a <i>R</i> ,12b <i>S</i> ,17b <i>R</i> )- <b>4dc</b> (green) (multiplied by 0.2). .... | 195 |
| Figure S199. On-line HPLC-ECD spectra of (6a <i>S</i> ,12b <i>R</i> ,17b <i>S</i> )- <b>4ae</b> (black) and (6a <i>R</i> ,12b <i>S</i> ,17b <i>R</i> )- <b>4ae</b> (red) in hexane/dichloromethane/methanol 50:45:5. ....                                         | 196 |
| Figure S200. On-line HPLC-ECD spectrum of (6a <i>S</i> ,12b <i>R</i> ,17b <i>S</i> )- <b>4ae</b> (red) in hexane/dichloromethane/methanol 50:45:5 and ECD spectrum of (6a <i>S</i> ,7 <i>R</i> ,12b <i>R</i> ,17b <i>S</i> )- <b>4be</b> (blue) in MeCN. ....     | 196 |
| Figure S201. On-line HPLC-ECD spectra of (6a <i>S</i> ,12b <i>R</i> ,17b <i>S</i> )- <b>6ae</b> (red) and (6a <i>R</i> ,12b <i>S</i> ,17b <i>R</i> )- <b>6ae</b> (black) in hexane/dichloromethane/methanol 30:63:7.....                                          | 197 |

|                                                                                                                                                                                                                                                                           |     |
|---------------------------------------------------------------------------------------------------------------------------------------------------------------------------------------------------------------------------------------------------------------------------|-----|
| Figure S202. On-line HPLC-ECD spectrum of (6a <i>S</i> ,12b <i>R</i> ,17b <i>S</i> )- <b>6ae</b> (red) in hexane/dichloromethane/methanol 30:63:7 and ECD spectrum of (6a <i>S</i> ,7 <i>R</i> ,12b <i>R</i> ,17b <i>S</i> )- <b>6be</b> (blue) in MeCN. ....             | 197 |
| Figure S203. On-line HPLC-ECD spectra of (6a <i>S</i> ,12b <i>R</i> ,17b <i>R</i> )- <b>5ae</b> (black) and (6a <i>R</i> ,12b <i>S</i> ,17b <i>S</i> )- <b>5ae</b> (red) in hexane/dichloromethane/methanol 30:63:7.....                                                  | 198 |
| Figure S204. On-line HPLC-ECD spectrum of (6a <i>S</i> ,12b <i>R</i> ,17b <i>R</i> )- <b>5ae</b> (red) in hexane/dichloromethane/methanol 30:63:7 and ECD spectrum of (6a <i>S</i> ,7 <i>R</i> ,12b <i>R</i> ,17b <i>R</i> )- <b>5be</b> (blue) in MeCN. ....             | 198 |
| Figure S205. On-line HPLC-ECD spectra of first (black) and second (red) eluting enantiomer of <i>rac</i> -(6a <i>S</i> <sup>*</sup> ,12b <i>R</i> <sup>*</sup> ,17b <i>R</i> <sup>*</sup> )- <b>7ae</b> in hexane/dichloromethane/methanol 30:63:7.....                   | 199 |
| Figure S206. Effect of <b>4aa-10ad</b> (50 μM) on the viable cell number of A2780 ovarian carcinoma cell line. ....                                                                                                                                                       | 200 |
| Figure S207. Effect of <b>4aa-10ad</b> (50 μM) on the viable cell number of WM35 melanoma cell line. ....                                                                                                                                                                 | 200 |
| Figure S208. Concentration-dependent effect of <i>rac</i> -(6a <i>S</i> <sup>*</sup> ,12b <i>R</i> <sup>*</sup> ,17b <i>R</i> <sup>*</sup> )- <b>4ce</b> on the viability of A2780 cells. ....                                                                            | 201 |
| Figure S209. Concentration-dependent effect of <i>rac</i> -(6a <i>S</i> <sup>*</sup> ,12b <i>R</i> <sup>*</sup> ,19b <i>S</i> <sup>*</sup> )- <b>4aa</b> on the viability of CaCo-2 cells.....                                                                            | 201 |
| Figure S210. Concentration-dependent effect of <i>rac</i> -(6a <i>S</i> <sup>*</sup> ,7 <i>R</i> <sup>*</sup> ,12b <i>R</i> <sup>*</sup> ,19b <i>S</i> <sup>*</sup> )- <b>4ba</b> on the viability of CaCo-2 cells. ....                                                  | 202 |
| Figure S211. Concentration-dependent effect of (6a <i>S</i> ,7 <i>R</i> ,12b <i>R</i> ,19b <i>S</i> )- <b>4ba</b> on the viability of CaCo-2 cells. ....                                                                                                                  | 202 |
| Figure S212. Concentration-dependent effect of <i>rac</i> -(6a <i>S</i> <sup>*</sup> ,12b <i>R</i> <sup>*</sup> ,19b <i>S</i> <sup>*</sup> )- <b>4ac</b> on the viability of CaCo-2 cells.....                                                                            | 203 |
| Figure S213. Concentration-dependent effect of <i>rac</i> -(6a <i>S</i> <sup>*</sup> ,12b <i>R</i> <sup>*</sup> ,19b <i>S</i> <sup>*</sup> )- <b>4ec</b> on the viability of CaCo-2 cells.....                                                                            | 203 |
| Figure S214. Concentration-dependent effect of <i>rac</i> -(6a <i>S</i> <sup>*</sup> ,12b <i>R</i> <sup>*</sup> ,19b <i>R</i> <sup>*</sup> )- <b>4cd</b> on the viability of A2780 cells. ....                                                                            | 204 |
| Figure S215. Concentration-dependent effect of <i>rac</i> -(6a <i>S</i> <sup>*</sup> ,12b <i>R</i> <sup>*</sup> ,17b <i>S</i> <sup>*</sup> )- <b>6ae</b> on the viability of CaCo-2 cells.....                                                                            | 204 |
| Figure S216. ORTEP view of <i>rac</i> -(6a <i>S</i> <sup>*</sup> ,12b <i>R</i> <sup>*</sup> ,19b <i>R</i> <sup>*</sup> )- <b>4cc</b> with numbering scheme. Red curly arrows represent characteristic NOE correlations for the assignment of relative configuration. .... | 215 |
| Figure S217. ORTEP view of <i>rac</i> -(6a <i>S</i> <sup>*</sup> ,12b <i>R</i> <sup>*</sup> ,19b <i>R</i> <sup>*</sup> )- <b>6cc</b> with numbering scheme. Red curly arrows represent characteristic NOE correlations for the assignment of relative configuration. .... | 221 |
| Figure S218. Overlay of the two molecules in the structure of <b>6cc</b> showing the conformational differences. Hydrogen atoms are omitted for clarity.....                                                                                                              | 221 |

## List of Tables

|                                                                                                                                                         |     |
|---------------------------------------------------------------------------------------------------------------------------------------------------------|-----|
| Table S1. Experimental details of single crystal X-ray diffraction study on <i>rac</i> -(6a <i>S</i> *,12b <i>R</i> *,19b <i>R</i> *)- <b>4cc</b> ..... | 206 |
| Table S2. Geometric parameters (Å, °) for <i>rac</i> -(6a <i>S</i> *,12b <i>R</i> *,19b <i>R</i> *)- <b>4cc</b> .....                                   | 207 |
| Table S3. Hydrogen-bond geometry (Å, °) for <i>rac</i> -(6a <i>S</i> *,12b <i>R</i> *,19b <i>R</i> *)- <b>4cc</b> .....                                 | 214 |
| Table S4. Experimental details of single crystal X-ray diffraction study on <i>rac</i> -(6a <i>S</i> *,12b <i>R</i> *,19b <i>R</i> *)- <b>6cc</b> ..... | 215 |
| Table S5. Geometric parameters (Å, °) for <i>rac</i> -(6a <i>S</i> *,12b <i>R</i> *,19b <i>R</i> *)- <b>6cc</b> .....                                   | 216 |
| Table S6. Hydrogen-bond geometry (Å, °) for <i>rac</i> -(6a <i>S</i> *,12b <i>R</i> *,19b <i>R</i> *)- <b>6cc</b> .....                                 | 220 |

## 1. Preparation of the starting materials of the domino reaction

Chromenes **1a-d** and pyrans **8ab** were prepared according to published methods.<sup>1,2</sup>

### 2-[[[(6-methoxy-2H-chromen-3-yl)methyl](methyl)amino]benzaldehyde (1e):

To a flame-dried, three-necked round-bottom flask, equipped with a reflux condenser and a CaCl<sub>2</sub> drying tube, 1-(6-methoxy-2H-chromen-3-yl)-N-methylmethanamine (300 mg, 1.46 mmol) and 2-fluoro-benzaldehyde (200 ml, 1.3 eq., 1.90 mmol) were added in 5 ml dry DMF. To the stirred solution, oven-dried K<sub>2</sub>CO<sub>3</sub> (500 mg, 2.5 eq., 3.65 mmol) was added, and the reaction mixture was refluxed for three days. The mixture was cooled down, poured onto water and extracted with ethyl acetate. The combined organic phase was dried over MgSO<sub>4</sub>, filtered, washed with ethyl acetate, and concentrated *in vacuo*. The resulting gum was purified by column chromatography (hexane/ethyl acetate 3:1), affording **1e** as yellow oil (57 mg, 12 %).

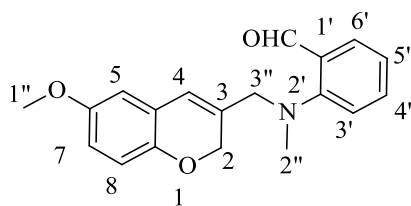

<sup>1</sup>H NMR (360 MHz, CDCl<sub>3</sub>): 2,95 (s, 3 H, 2''-H), 3,82 (s, 3 H, 1''-H), 3,89 (s, 2 H, 3''-H), 4,70 (s, 2 H, 2-H), 6,47 (s, 1 H, 4-H), 6,64 (d *J* = 2,9 Hz, 1 H, 5-H), 6,82-6,73 (m, 2 H, 7-H and 8-H), 7,22-7,14 (m, 2 H, 3'-H and 5'-H), 7,58 (dt *J* = 9.0 and 1,8 Hz, 1 H, 4'-H), 7,88 (dd *J* = 7,6 and 1,4 Hz, 1 H, 6'-H), 10,36 (s, 1 H, CHO). <sup>13</sup>C NMR (90 MHz, CDCl<sub>3</sub>): 43,0 (C-2''), 55,8 (C-1''), 60,3 (C-3''), 67,0 (C-2), 111,8 (C-5), 114,2 (C-8), 116,1 (C-3'), 119,4 (C-7), 122,2 (C-4 and C-5'), 122,9 (C-4a), 130,6 (C-6'), 134,8 (C-4'), 135,4 (C-3), 147,4 (C-8a), 154,3 (C-6), 155,3 (C-2'), 190,9 (CHO).

## 2. NMR spectra of condensed heterocycles 4-7

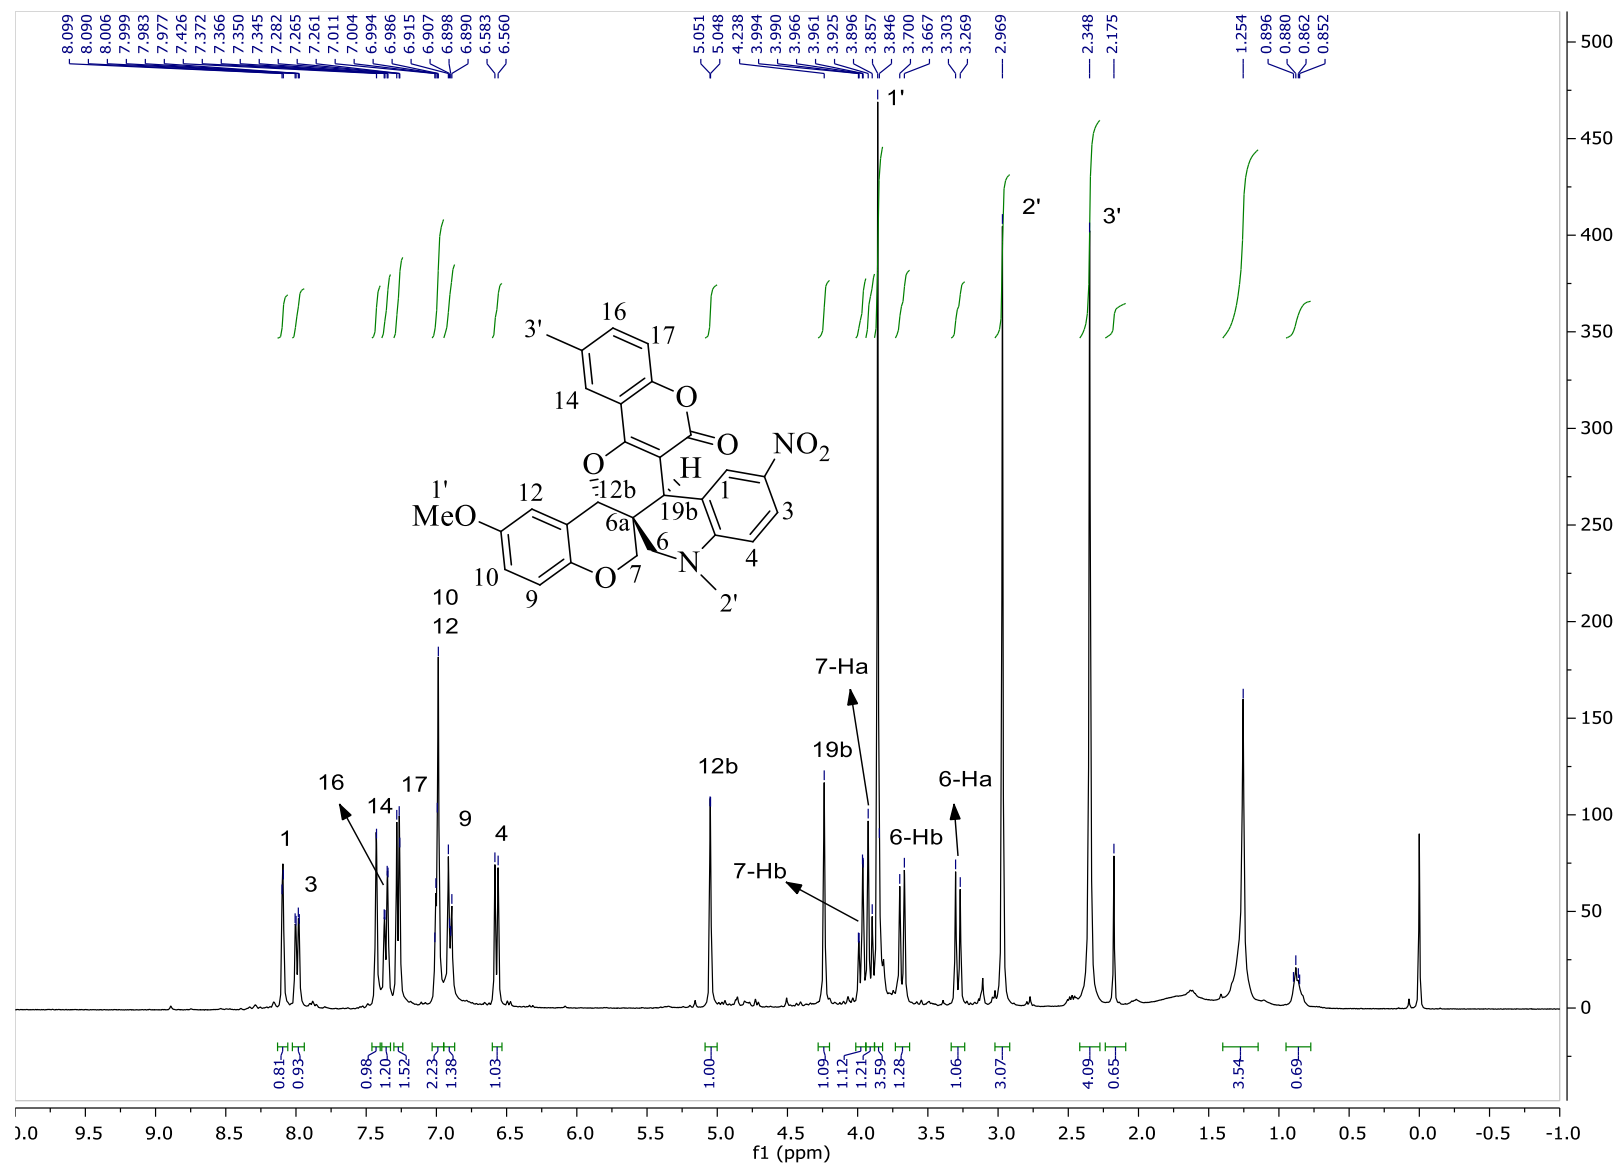

Figure S1. <sup>1</sup>H-NMR spectrum of *rac*-(6a*S*<sup>\*</sup>,12b*R*<sup>\*</sup>,19b*S*<sup>\*</sup>)-**4aa** in CDCl<sub>3</sub> at 400 MHz.



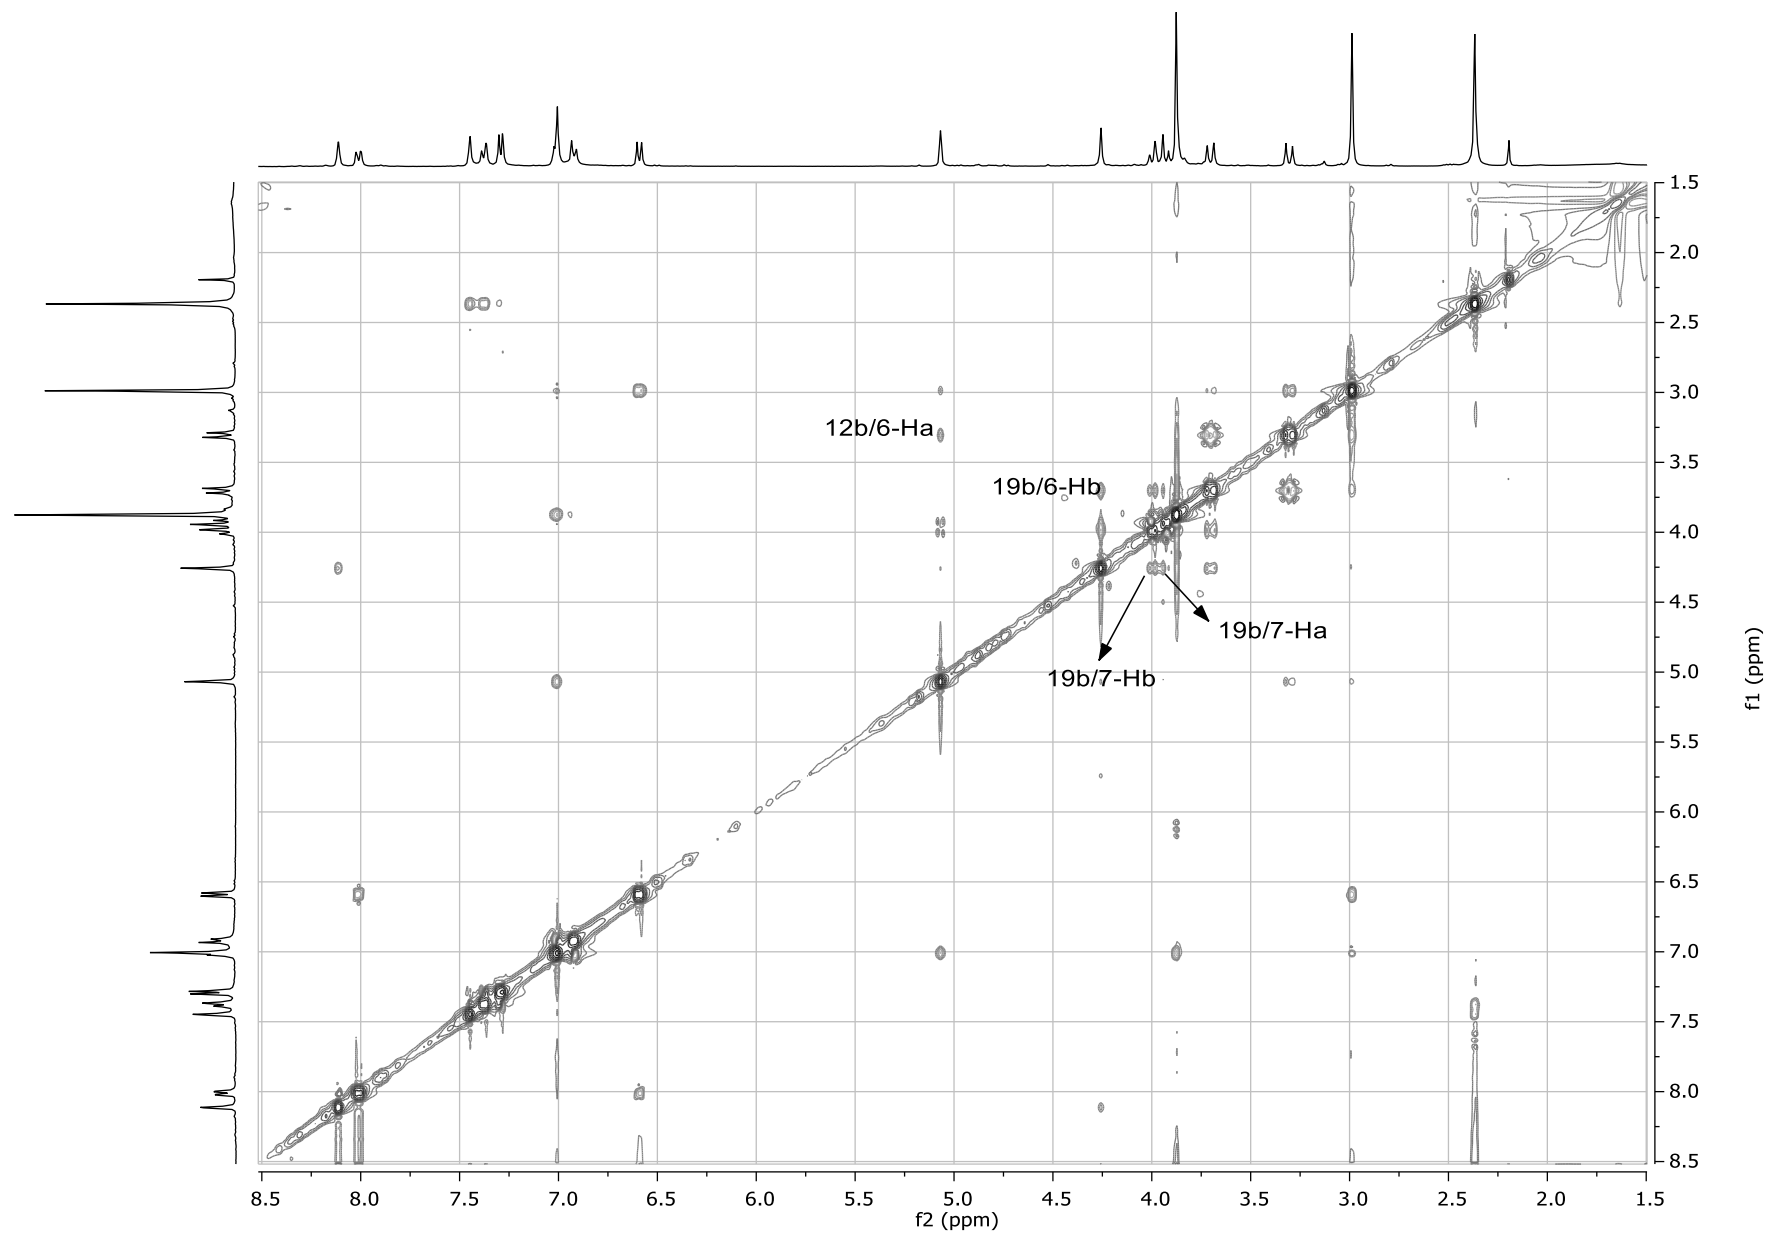

Figure S3. NOESY spectrum of *rac*-(6a*S*<sup>\*</sup>,12b*R*<sup>\*</sup>,19b*S*<sup>\*</sup>)-**4aa** in CDCl<sub>3</sub> at 400 MHz.

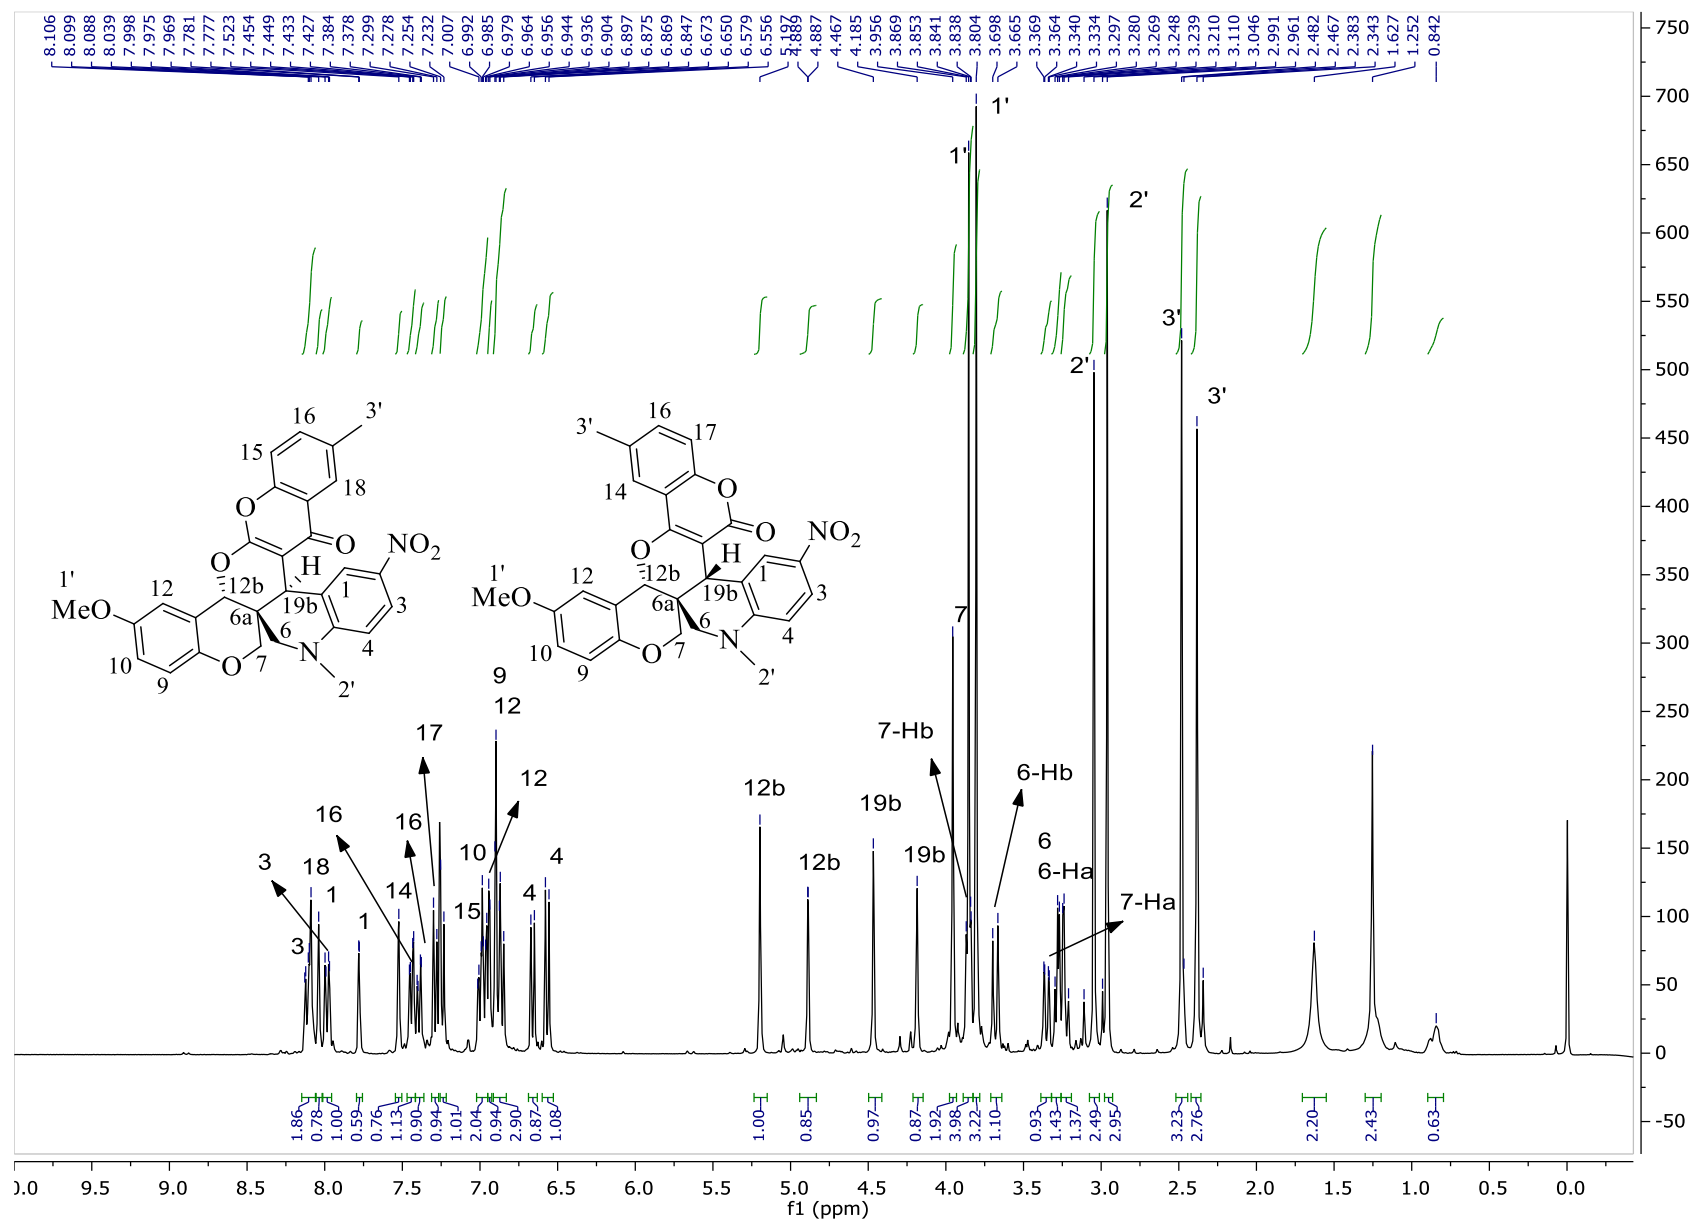

Figure S4. <sup>1</sup>H-NMR spectrum of *rac*-(6aS\*,12bR\*,19bS\*)-6aa and *rac*-(6aS\*,12bR\*,19bR\*)-5aa in CDCl<sub>3</sub> at 400 MHz.

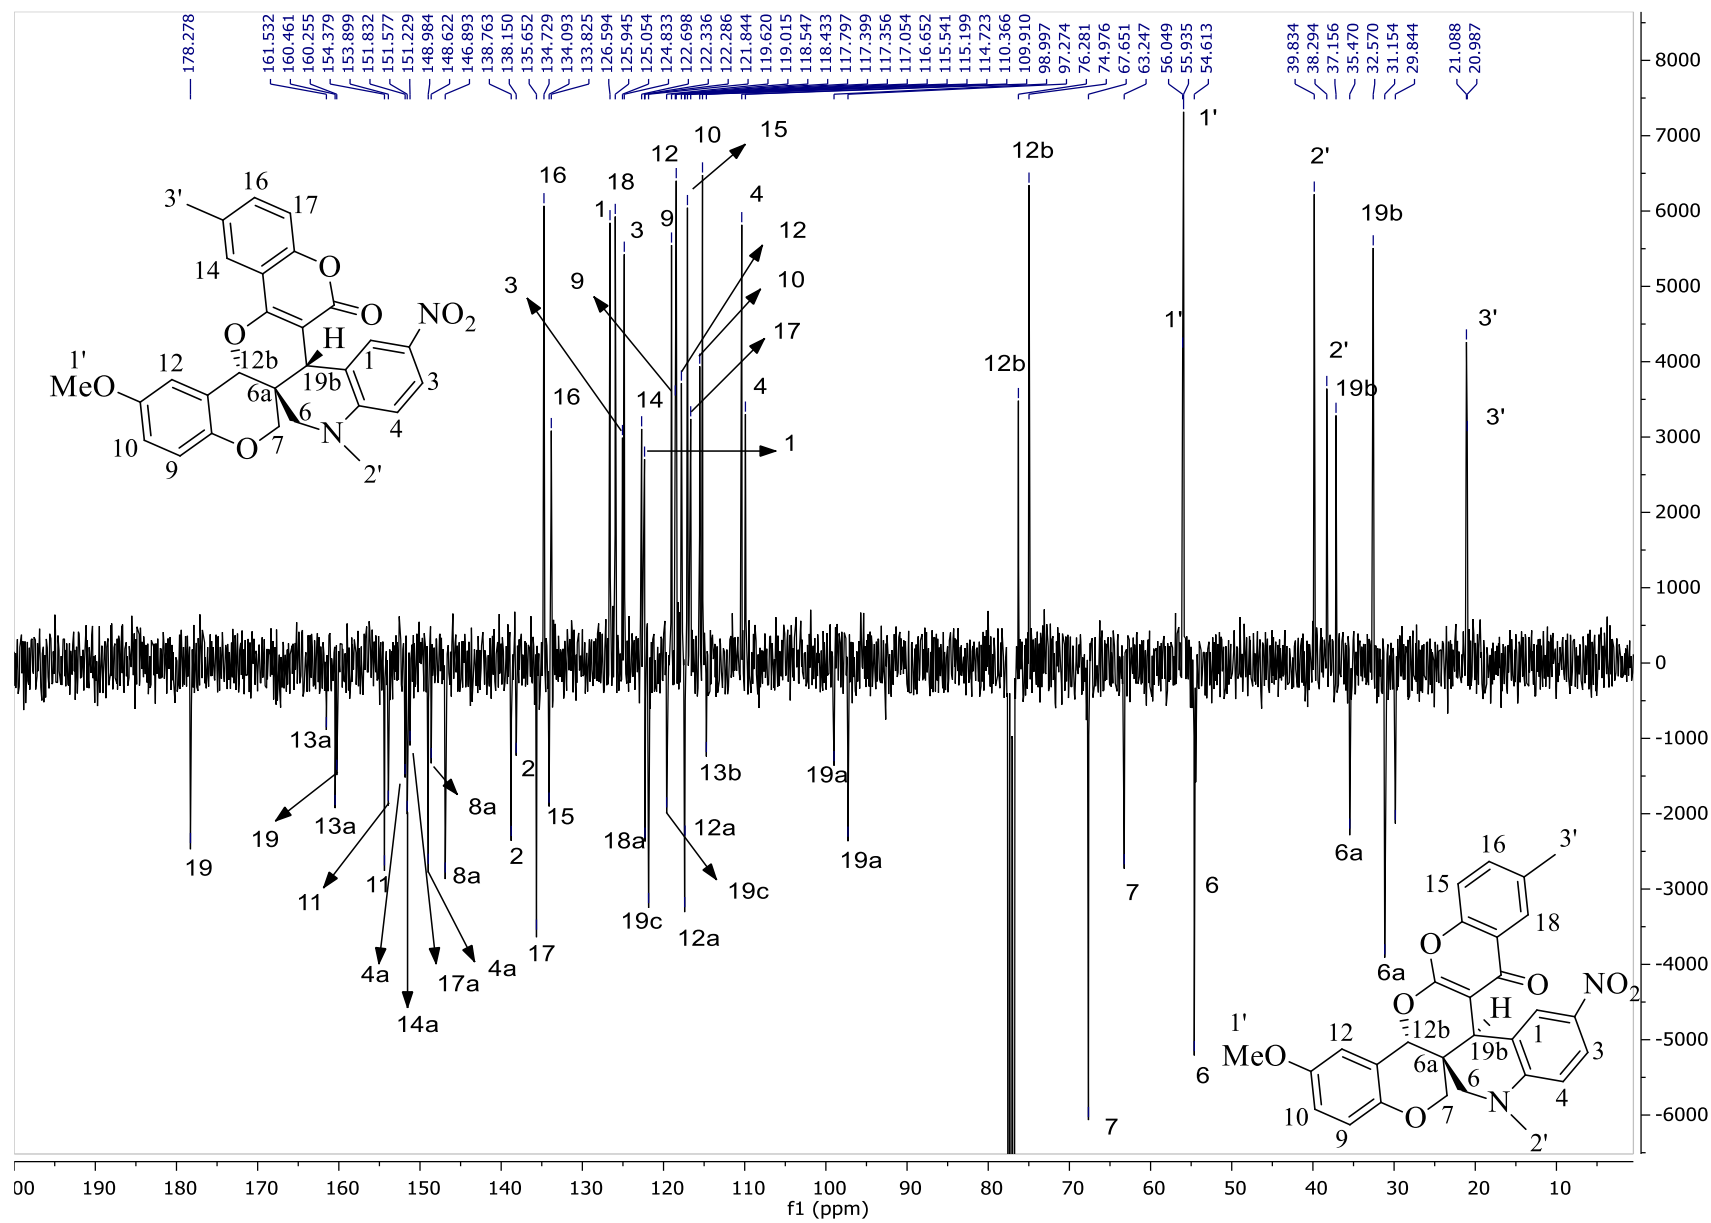

Figure S5.  $^{13}\text{C}$ -NMR spectrum of *rac*-(6a*S*\*,12b*R*\*,19b*S*\*)-6aa and *rac*-(6a*S*\*,12b*R*\*,19b*R*\*)-5aa in  $\text{CDCl}_3$  at 100 MHz.

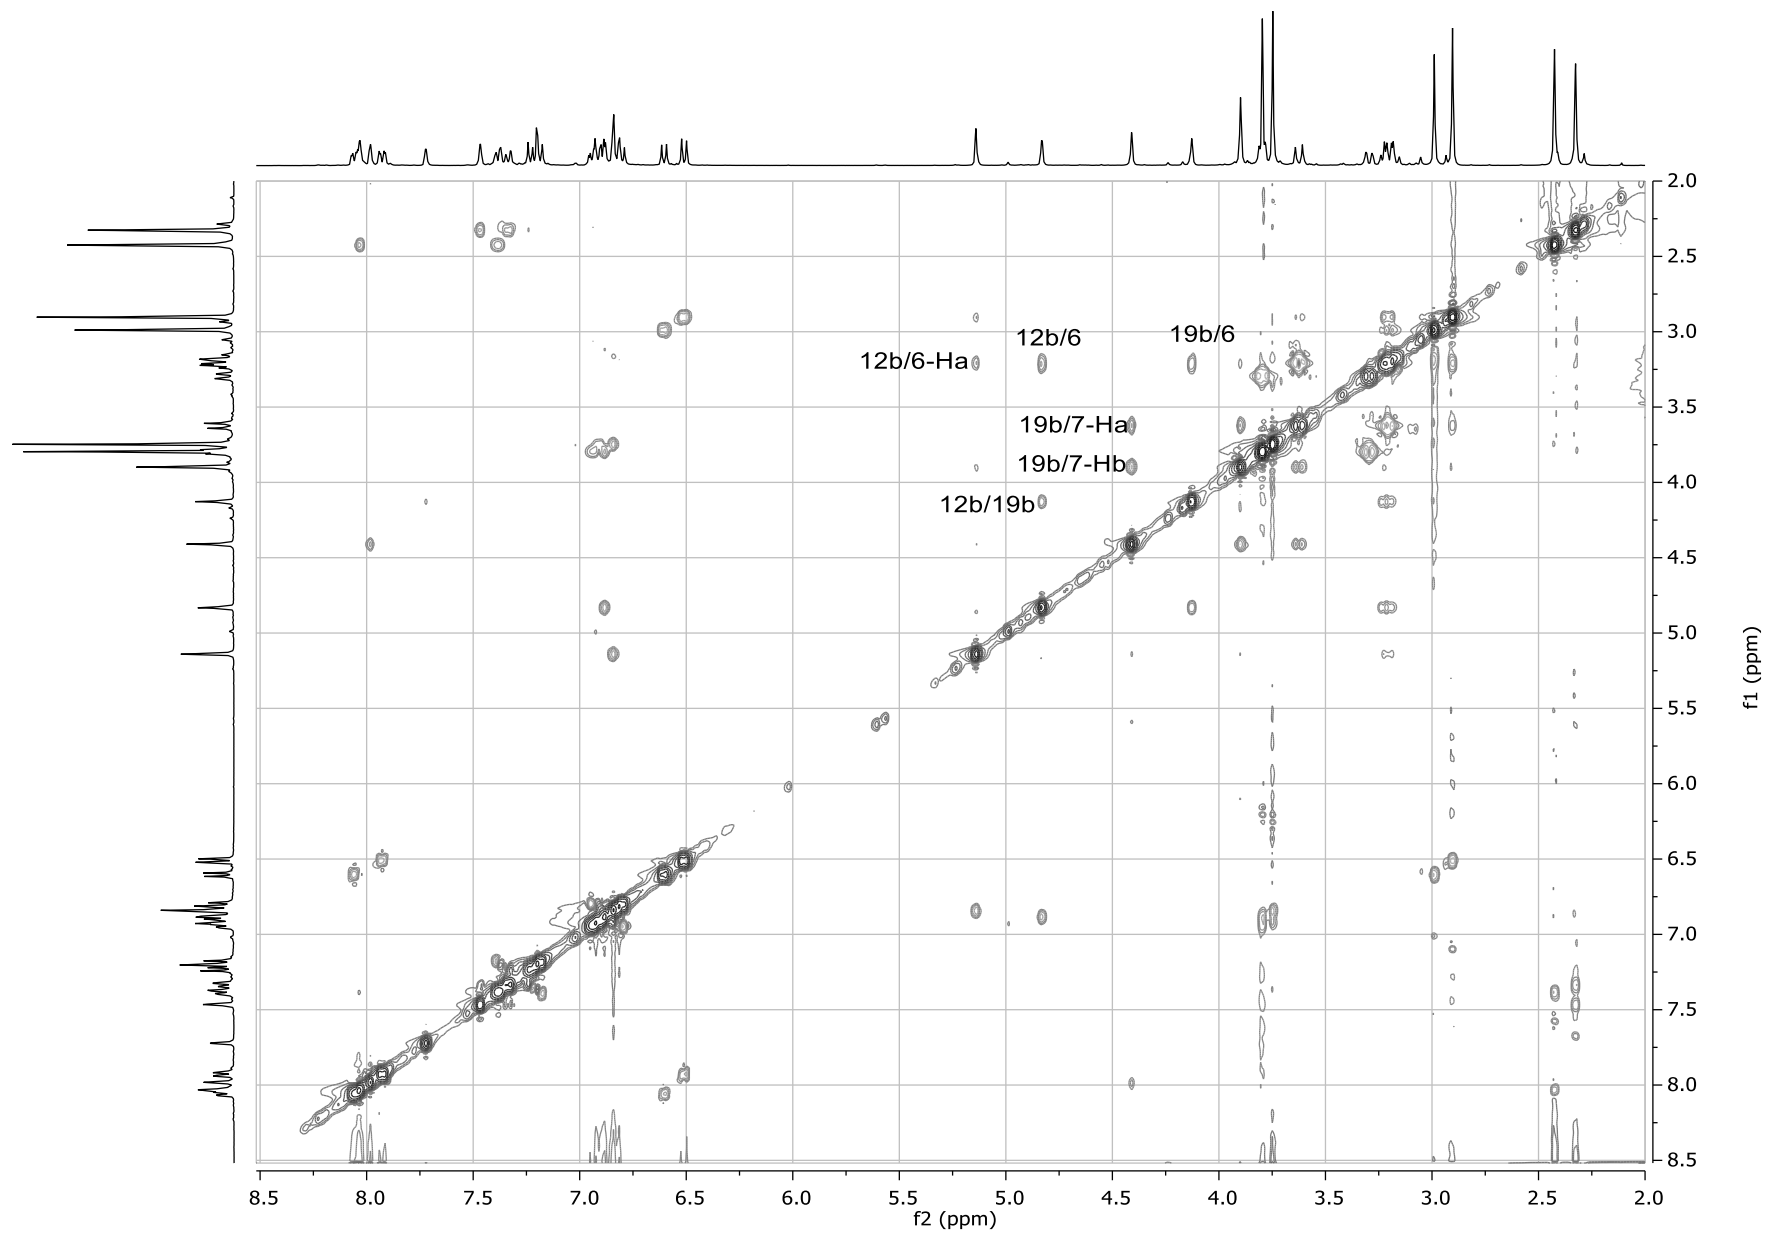

Figure S6. NOESY spectrum of *rac*-(6a*S*<sup>\*</sup>,12b*R*<sup>\*</sup>,19b*S*<sup>\*</sup>)-**6aa** and *rac*-(6a*S*<sup>\*</sup>,12b*R*<sup>\*</sup>,19b*R*<sup>\*</sup>)-**5aa** in CDCl<sub>3</sub> at 400 MHz.

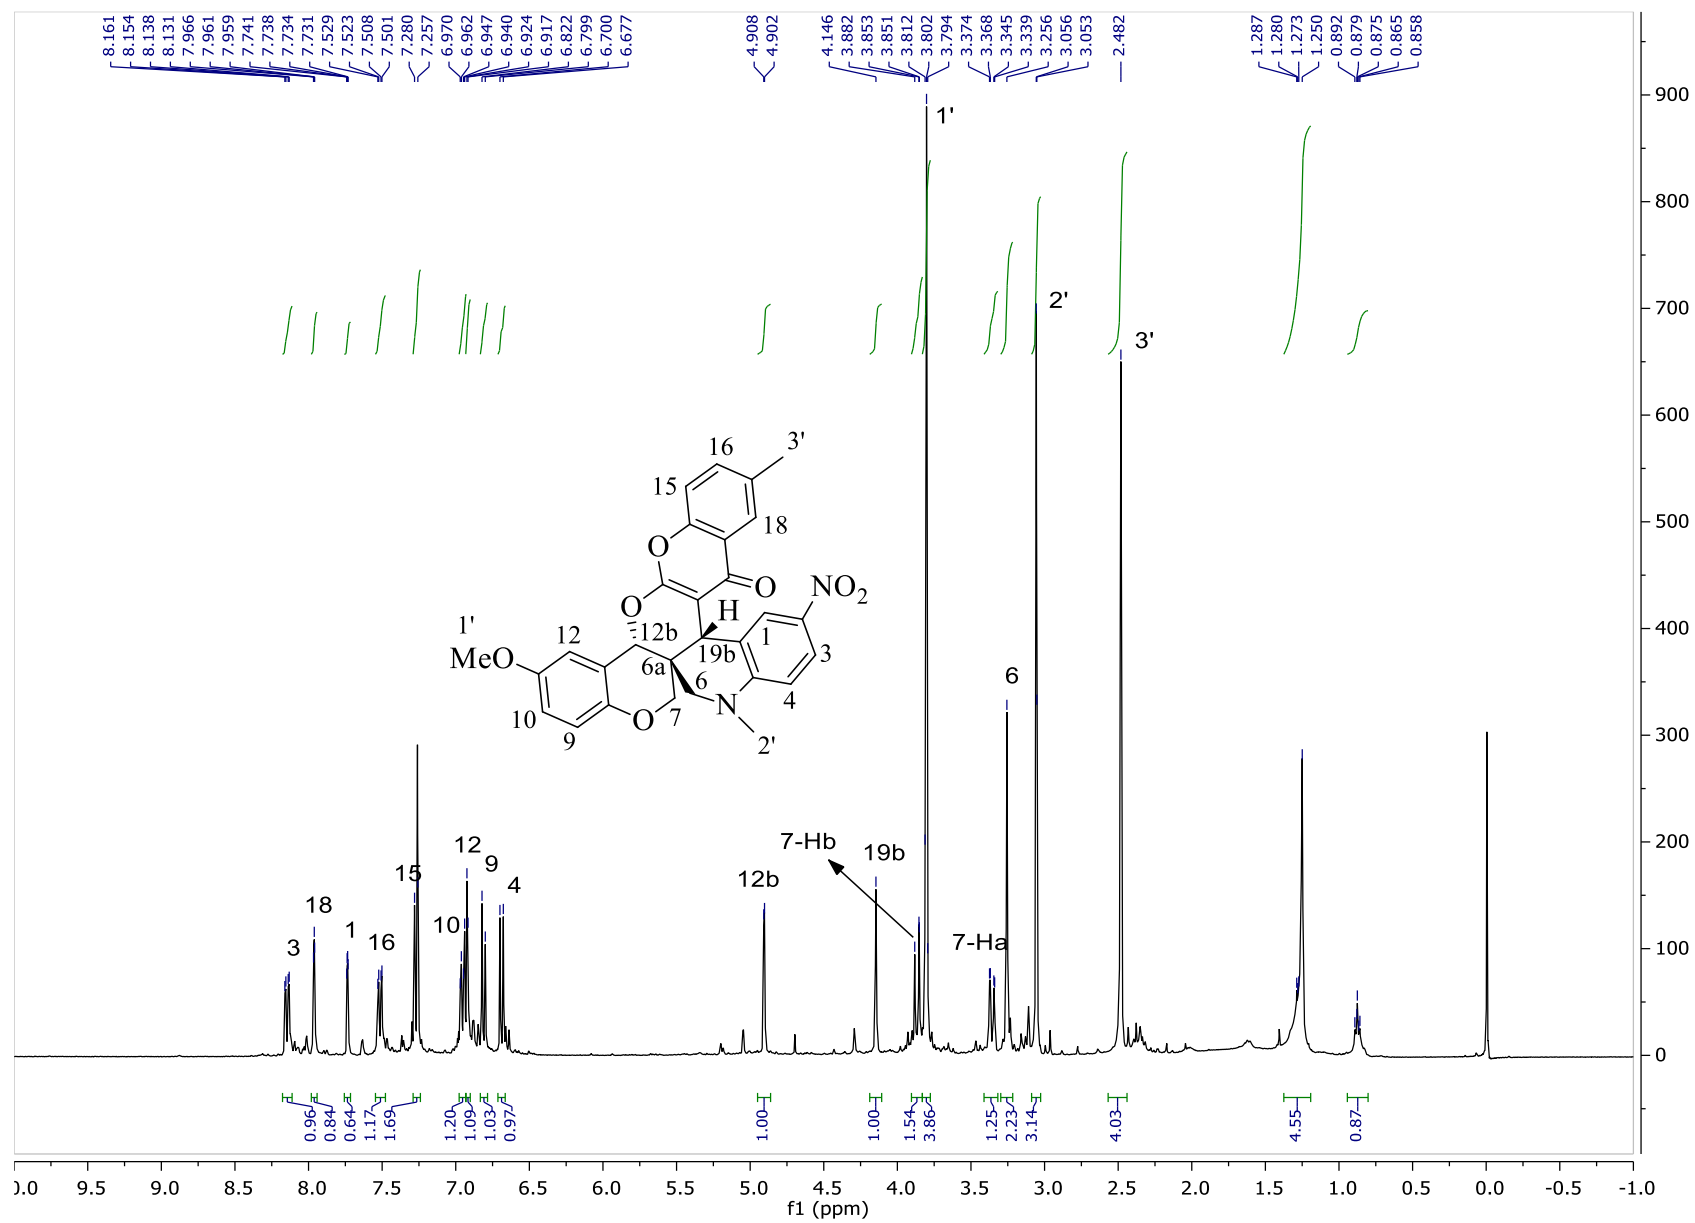

Figure S7. <sup>1</sup>H-NMR spectrum of *rac*-(6a*S*<sup>\*</sup>,12b*R*<sup>\*</sup>,19b*R*<sup>\*</sup>)-**7aa** in CDCl<sub>3</sub> at 400 MHz.



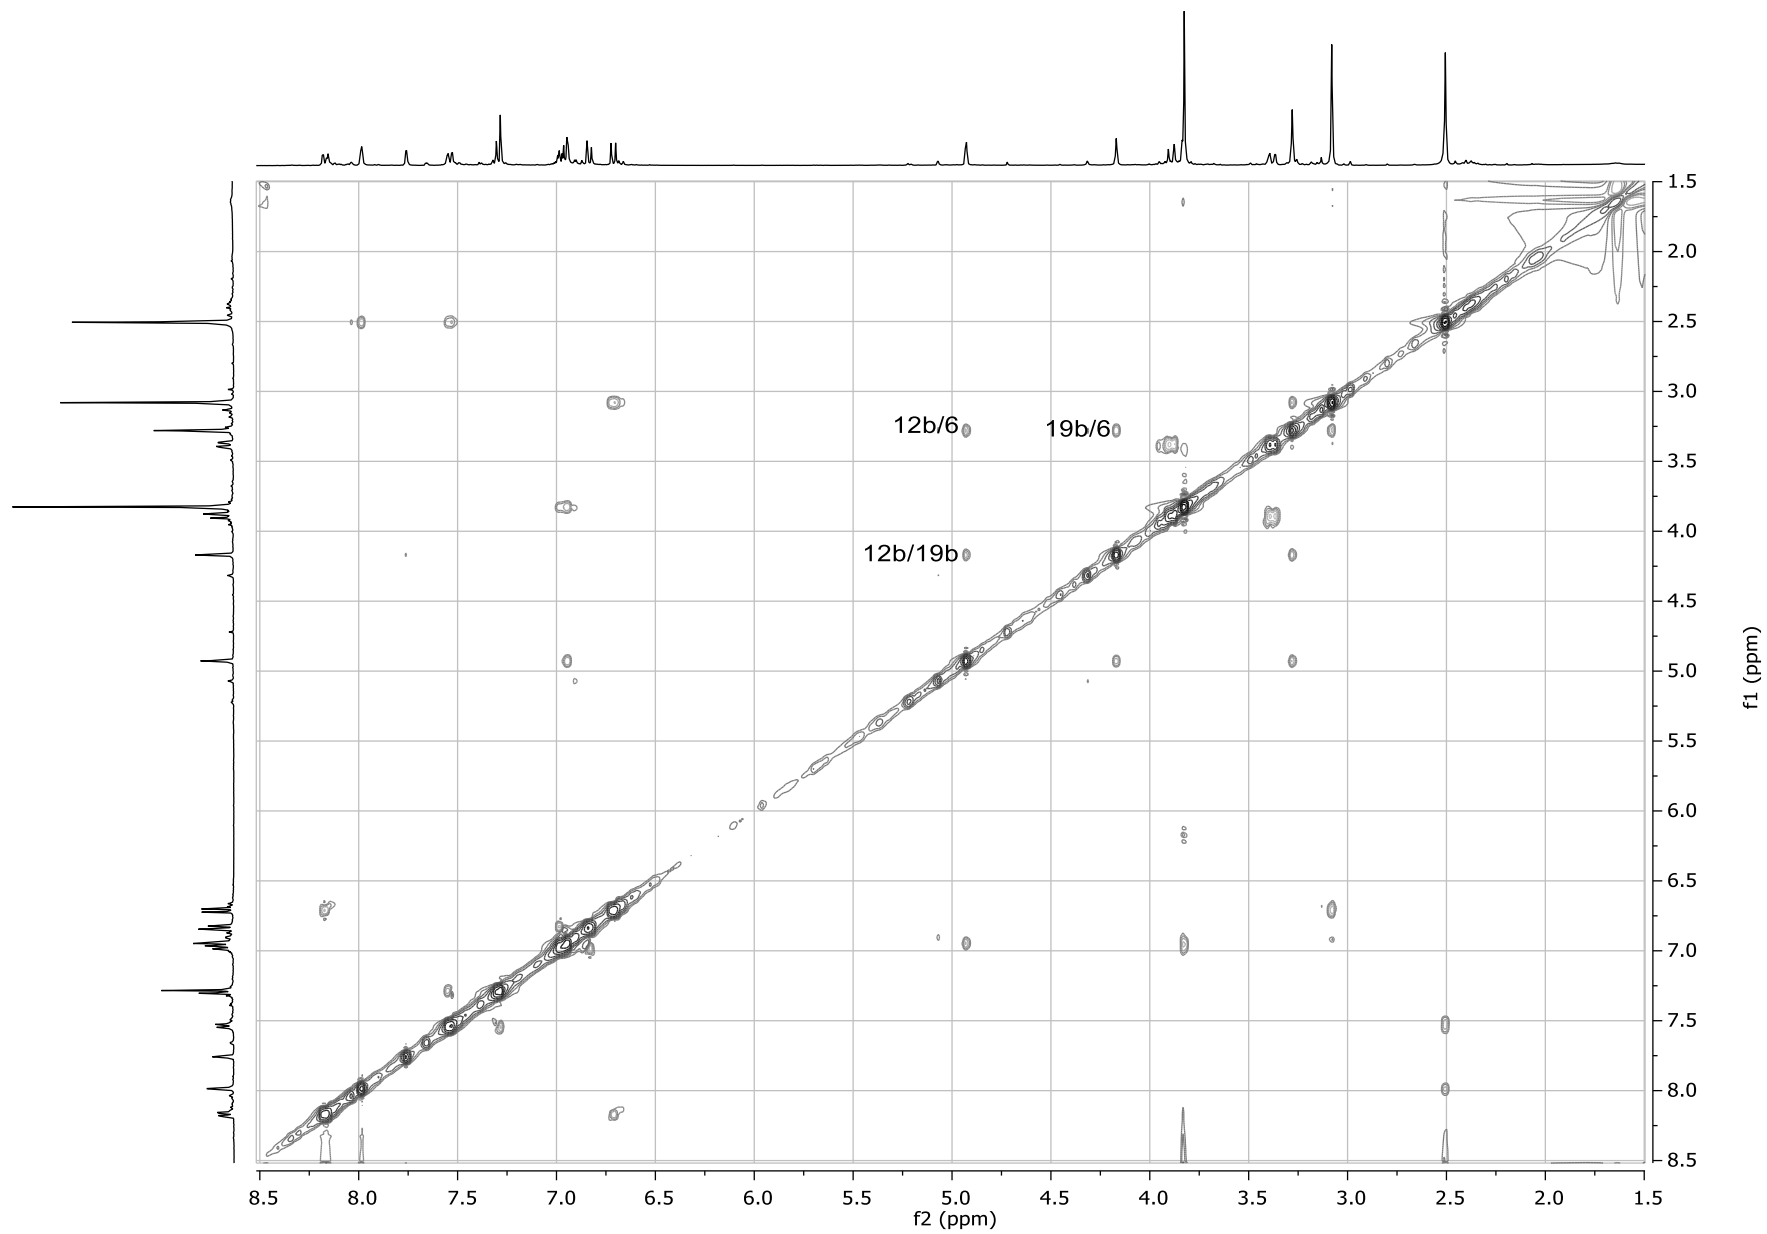

Figure S9. NOESY spectrum of *rac*-(6a*S*\*,12b*R*\*,19b*R*\*)-**7aa** in CDCl<sub>3</sub> at 400 MHz.

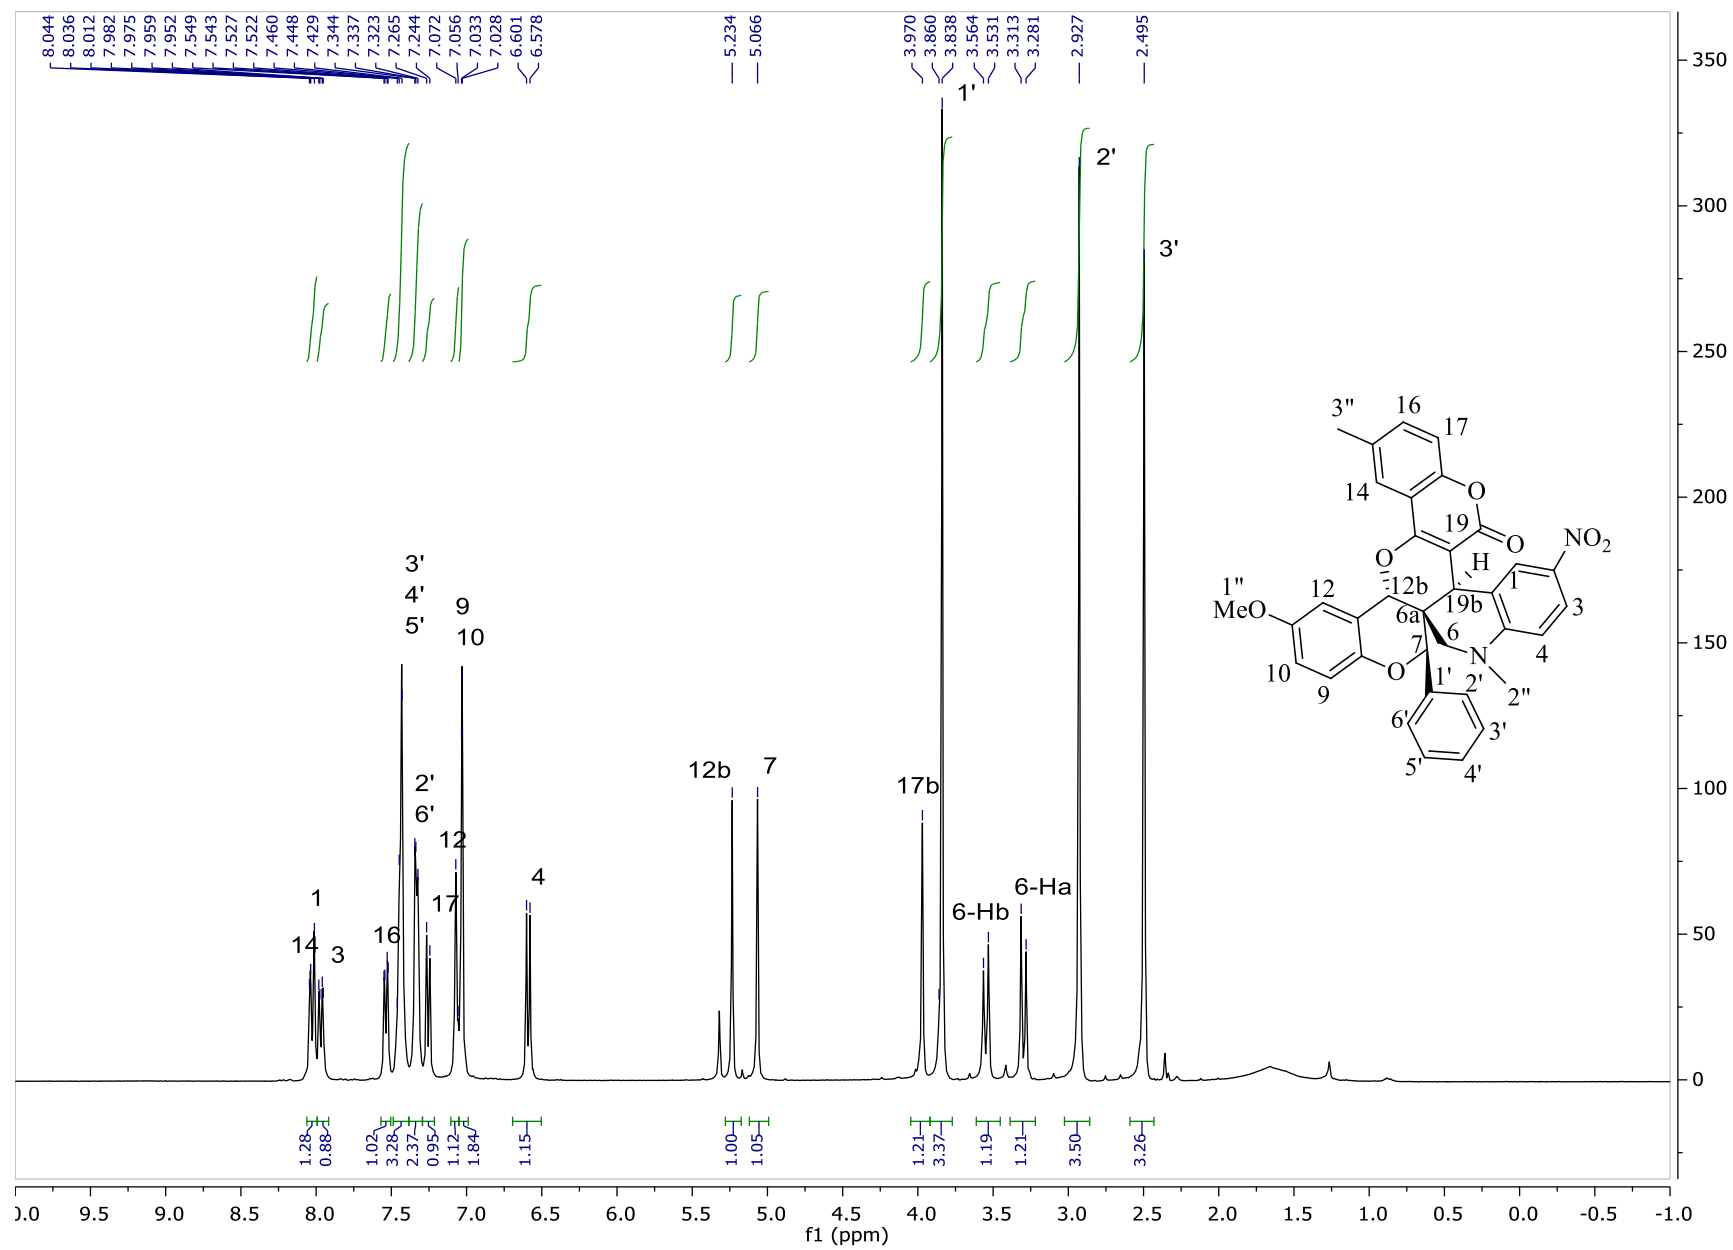

Figure S10. <sup>1</sup>H-NMR spectrum of (6aS,7R,12bR,19bS)-**4ba** in CD<sub>2</sub>Cl<sub>2</sub> at 400 MHz.

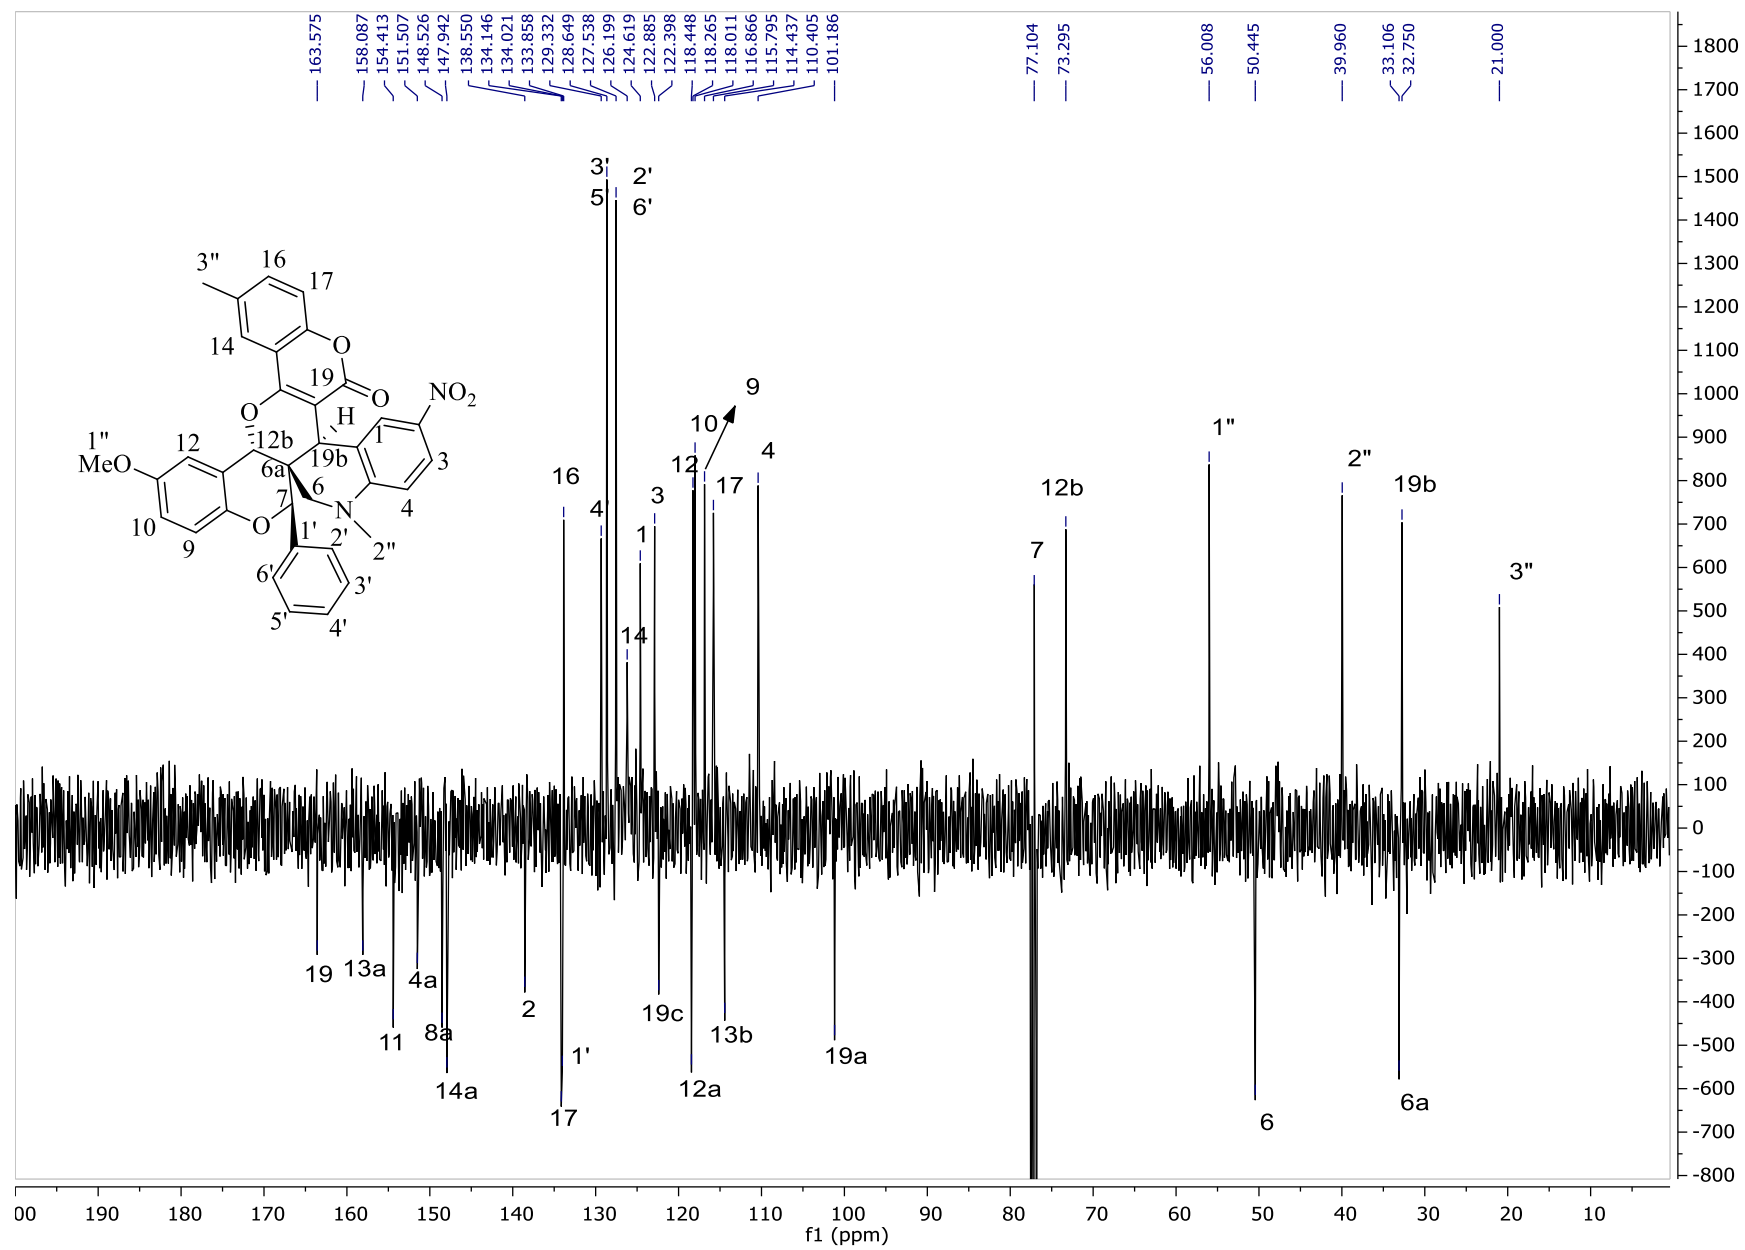

Figure S11.  $^{13}\text{C}$ -NMR spectrum of (6a*S*,7*R*,12b*R*,19b*S*)-**4ba** in  $\text{CDCl}_3$  at 100 MHz.

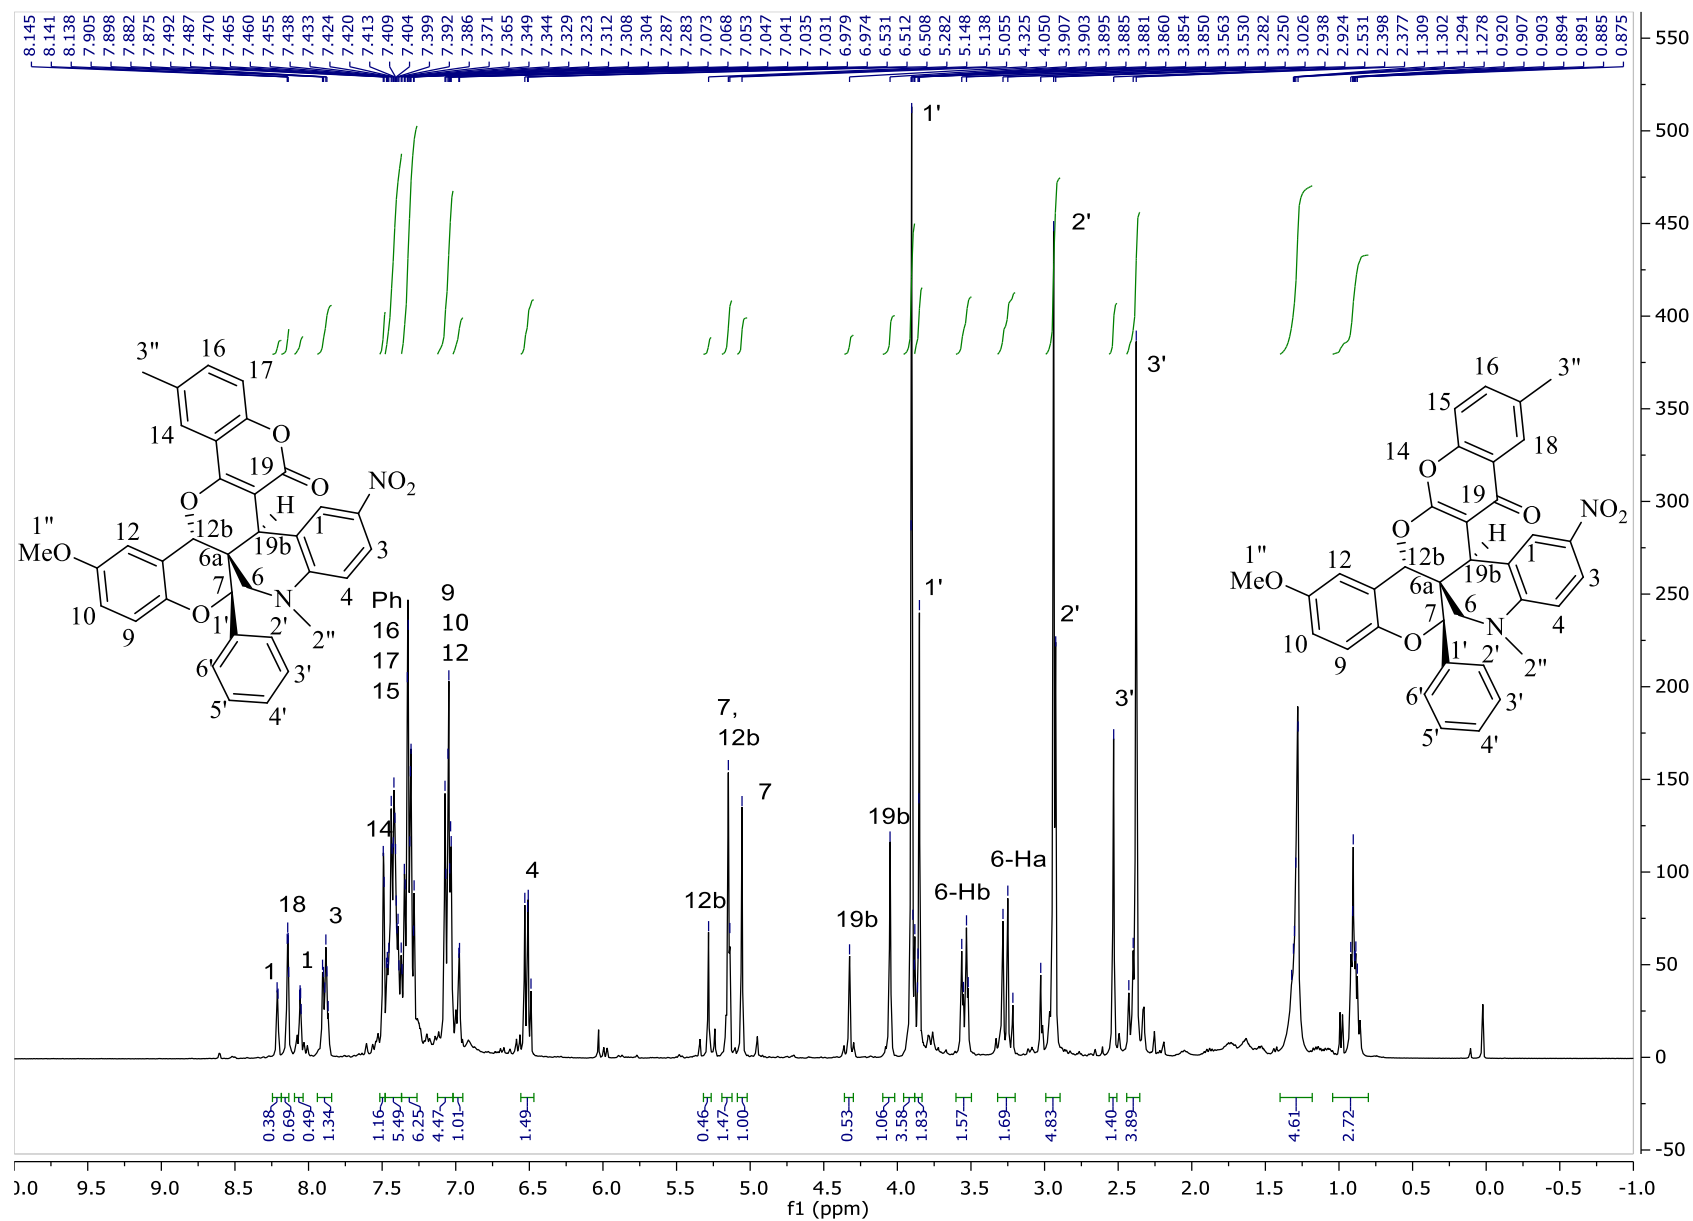

Figure S12.  $^1\text{H-NMR}$  spectrum of  $(6a_S, 7_R, 12b_R, 19b_S)$ -**4ba** and  $(6a_S, 7_R, 12b_R, 19b_S)$ -**6ba** in  $\text{CDCl}_3$  at 400 MHz.

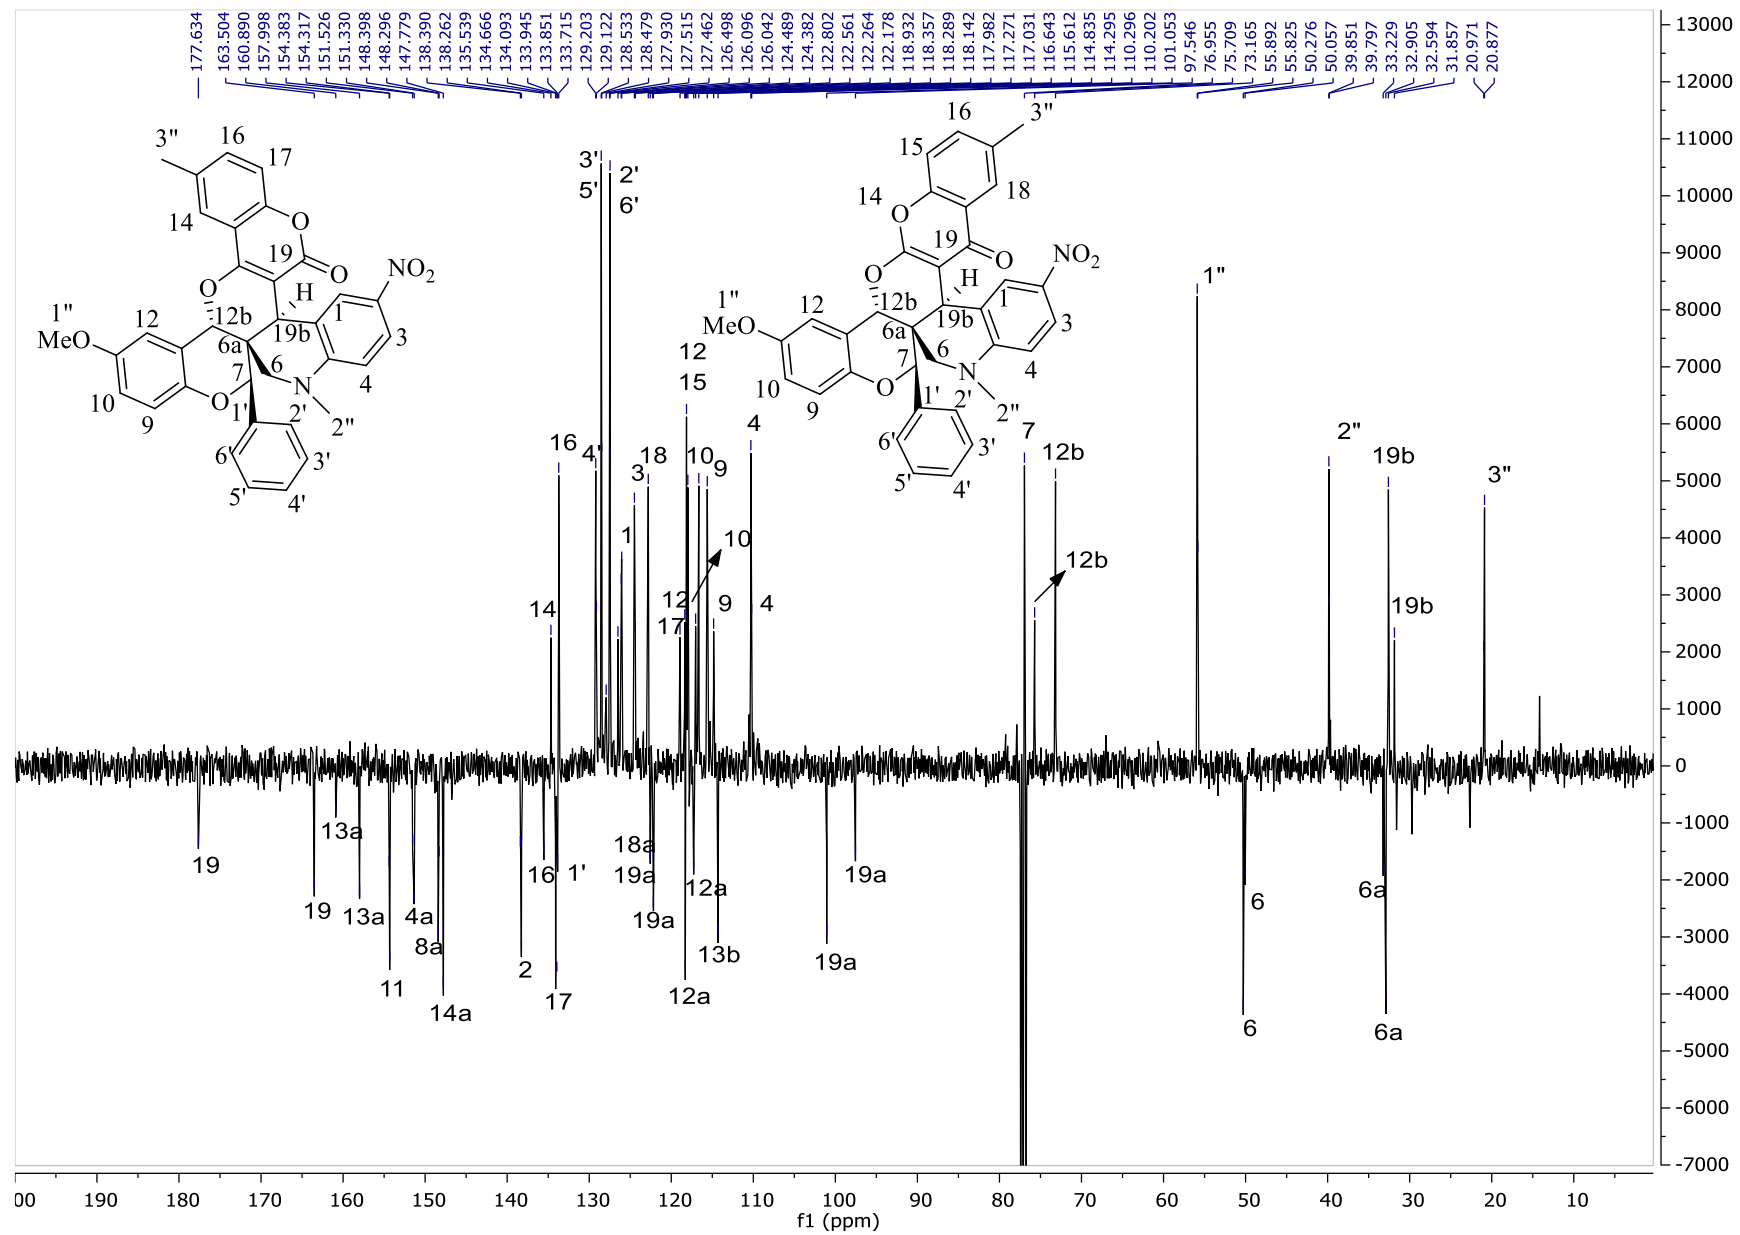

Figure S13. <sup>13</sup>C-NMR spectrum of (6a*S*,7*R*,12*b**R*,19*b**S*)-**4ba** and (6a*S*,7*R*,12*b**R*,19*b**S*)-**6ba** in CDCl<sub>3</sub> at 100 MHz.

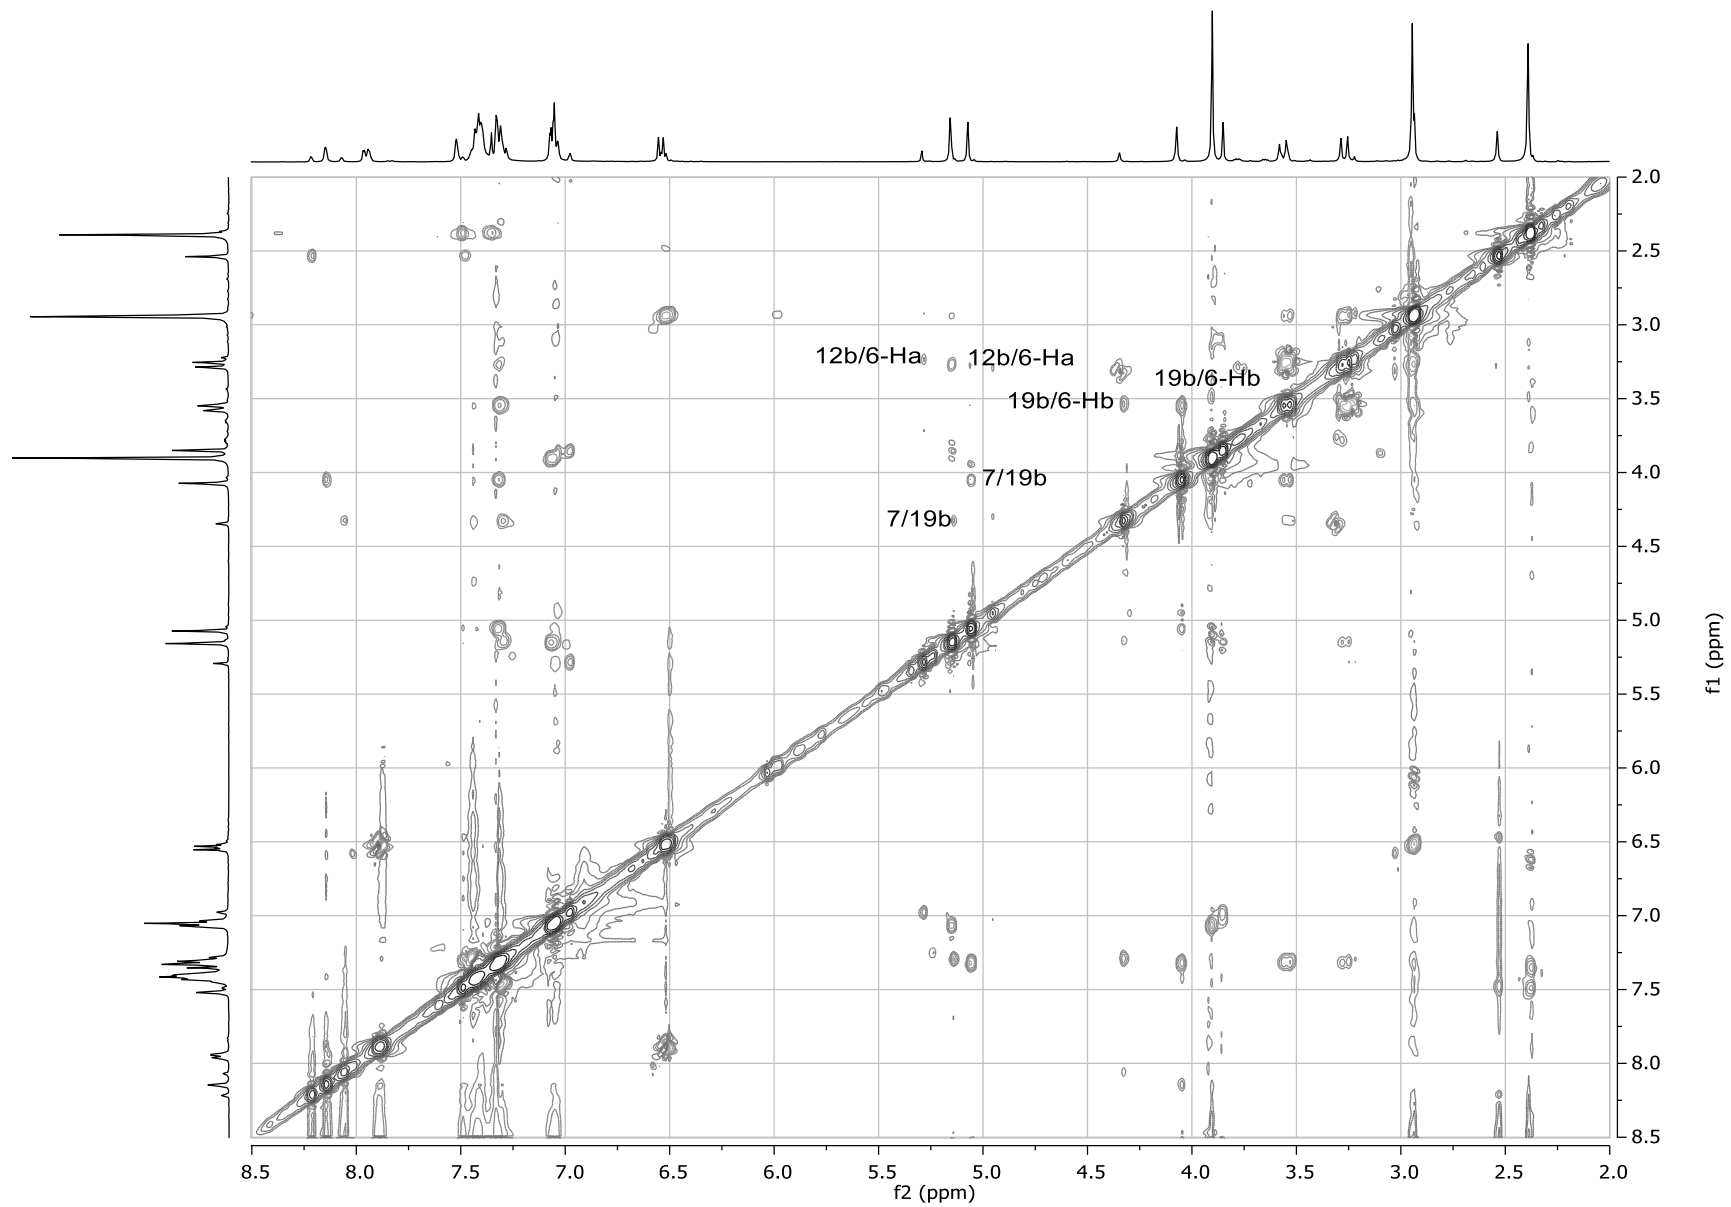

Figure S14. NOESY spectrum of (6a*S*,7*R*,12b*R*,19b*S*)-**4ba** and (6a*S*,7*R*,12b*R*,19b*S*)-**6ba** in CDCl<sub>3</sub> at 400 MHz.

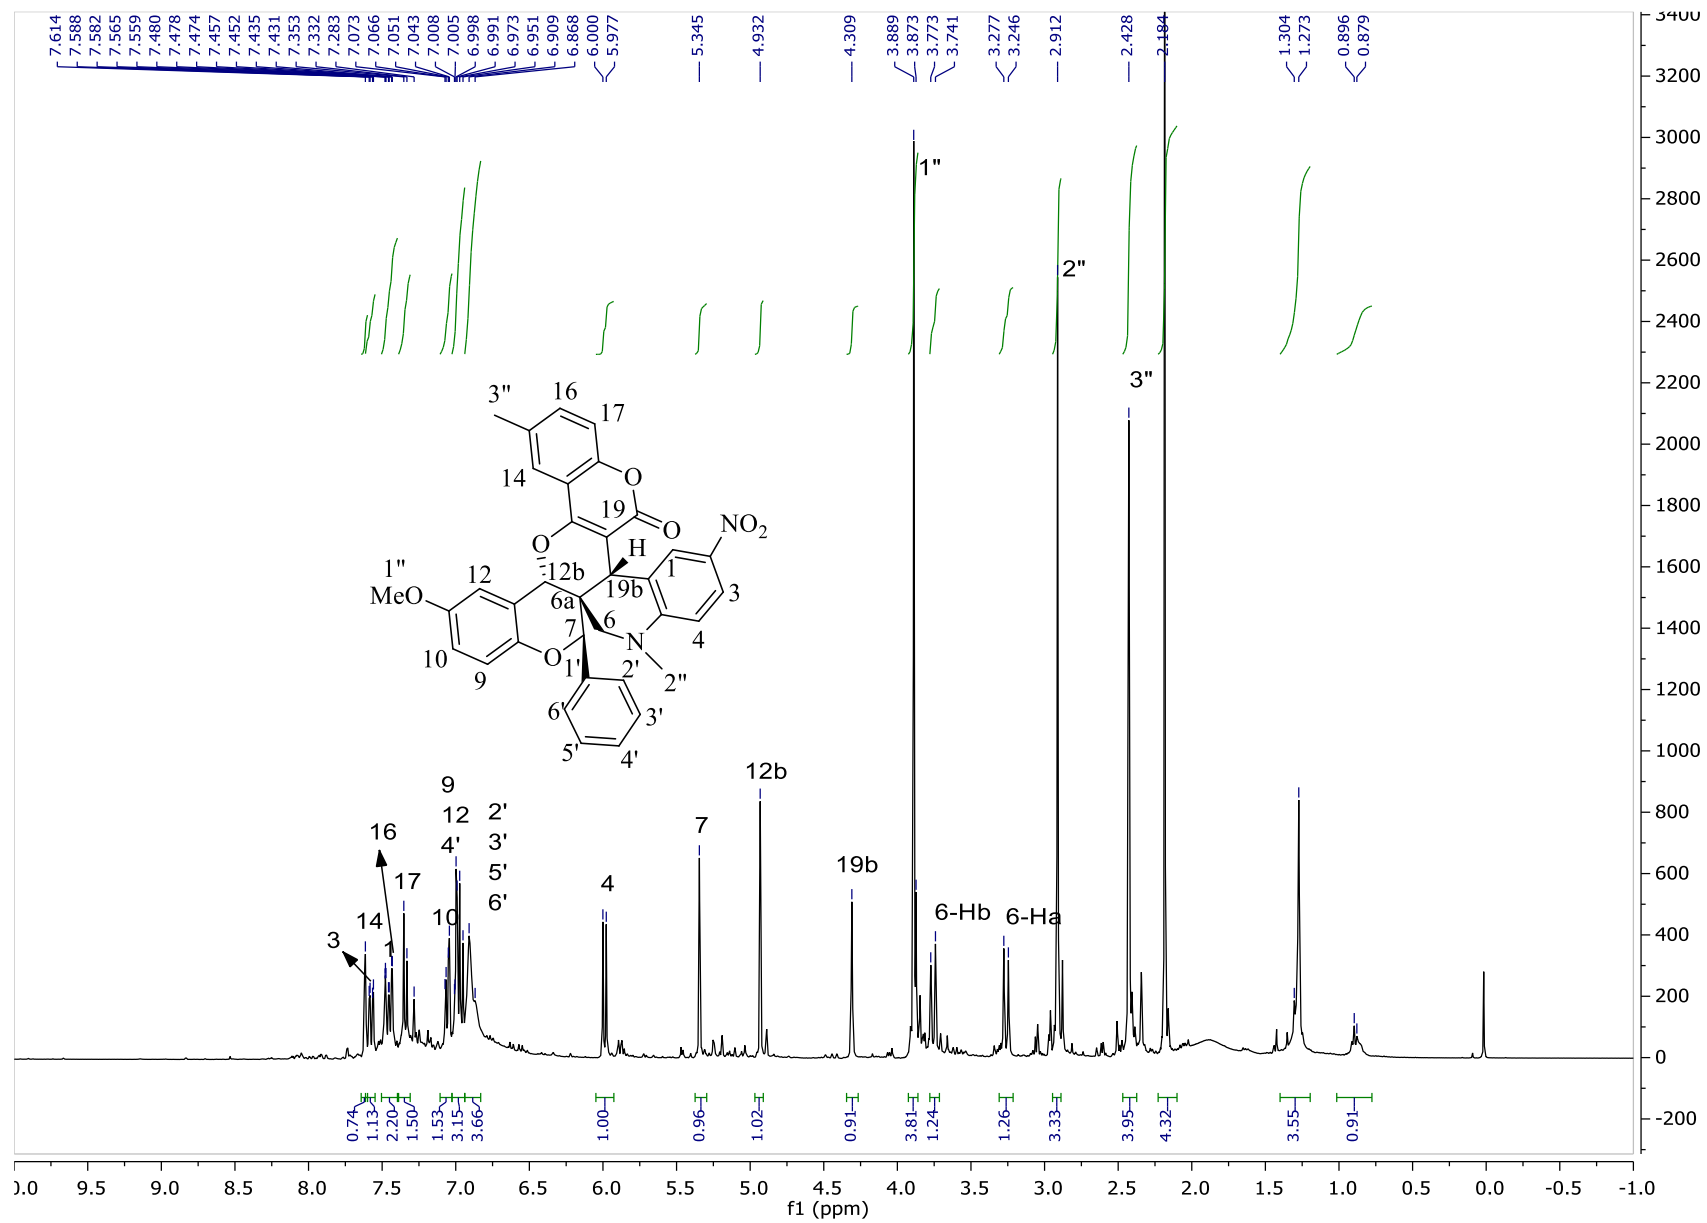

Figure S15. <sup>1</sup>H-NMR spectrum of (6aS,7R,12bR,19bR)-**5ba** in CDCl<sub>3</sub> at 400 MHz.

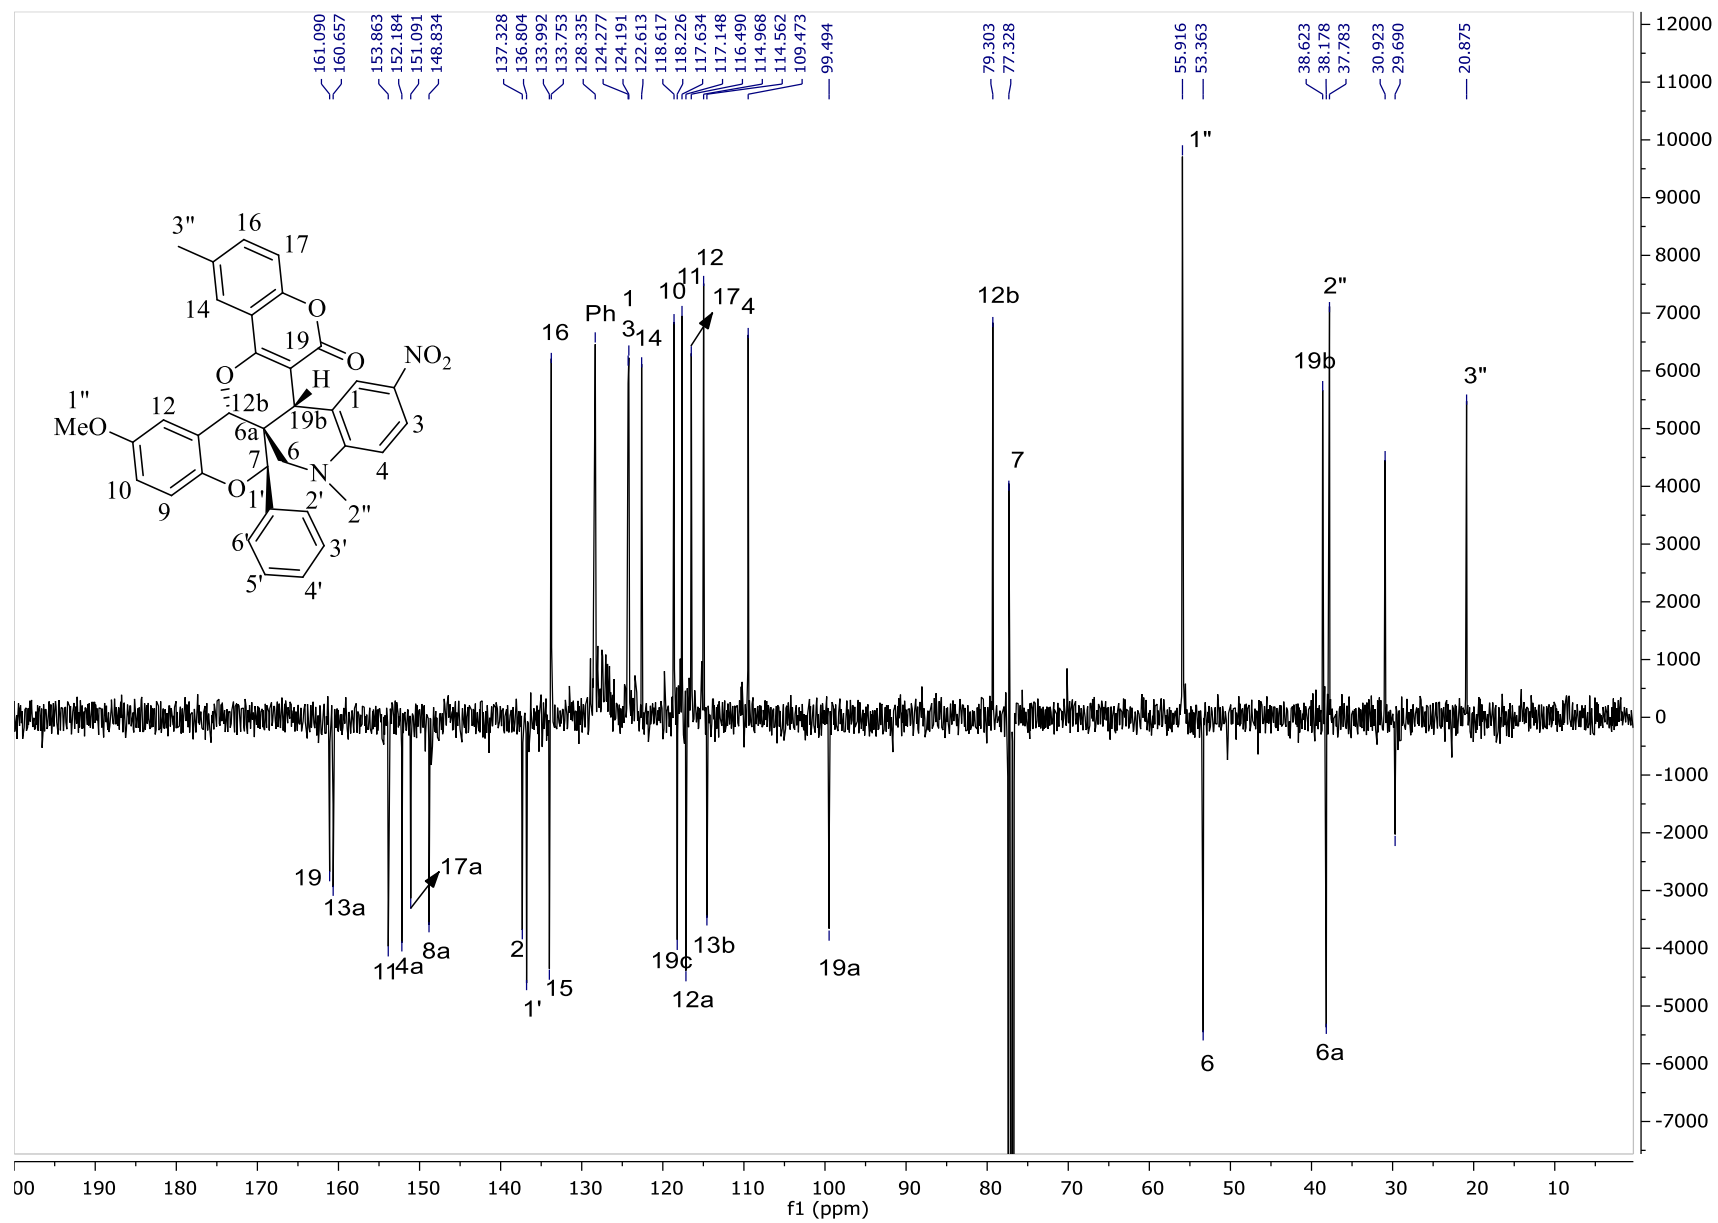

Figure S16. <sup>13</sup>C-NMR spectrum of (6aS,7R,12bR,19bR)-**5ba** in CDCl<sub>3</sub> at 100 MHz.

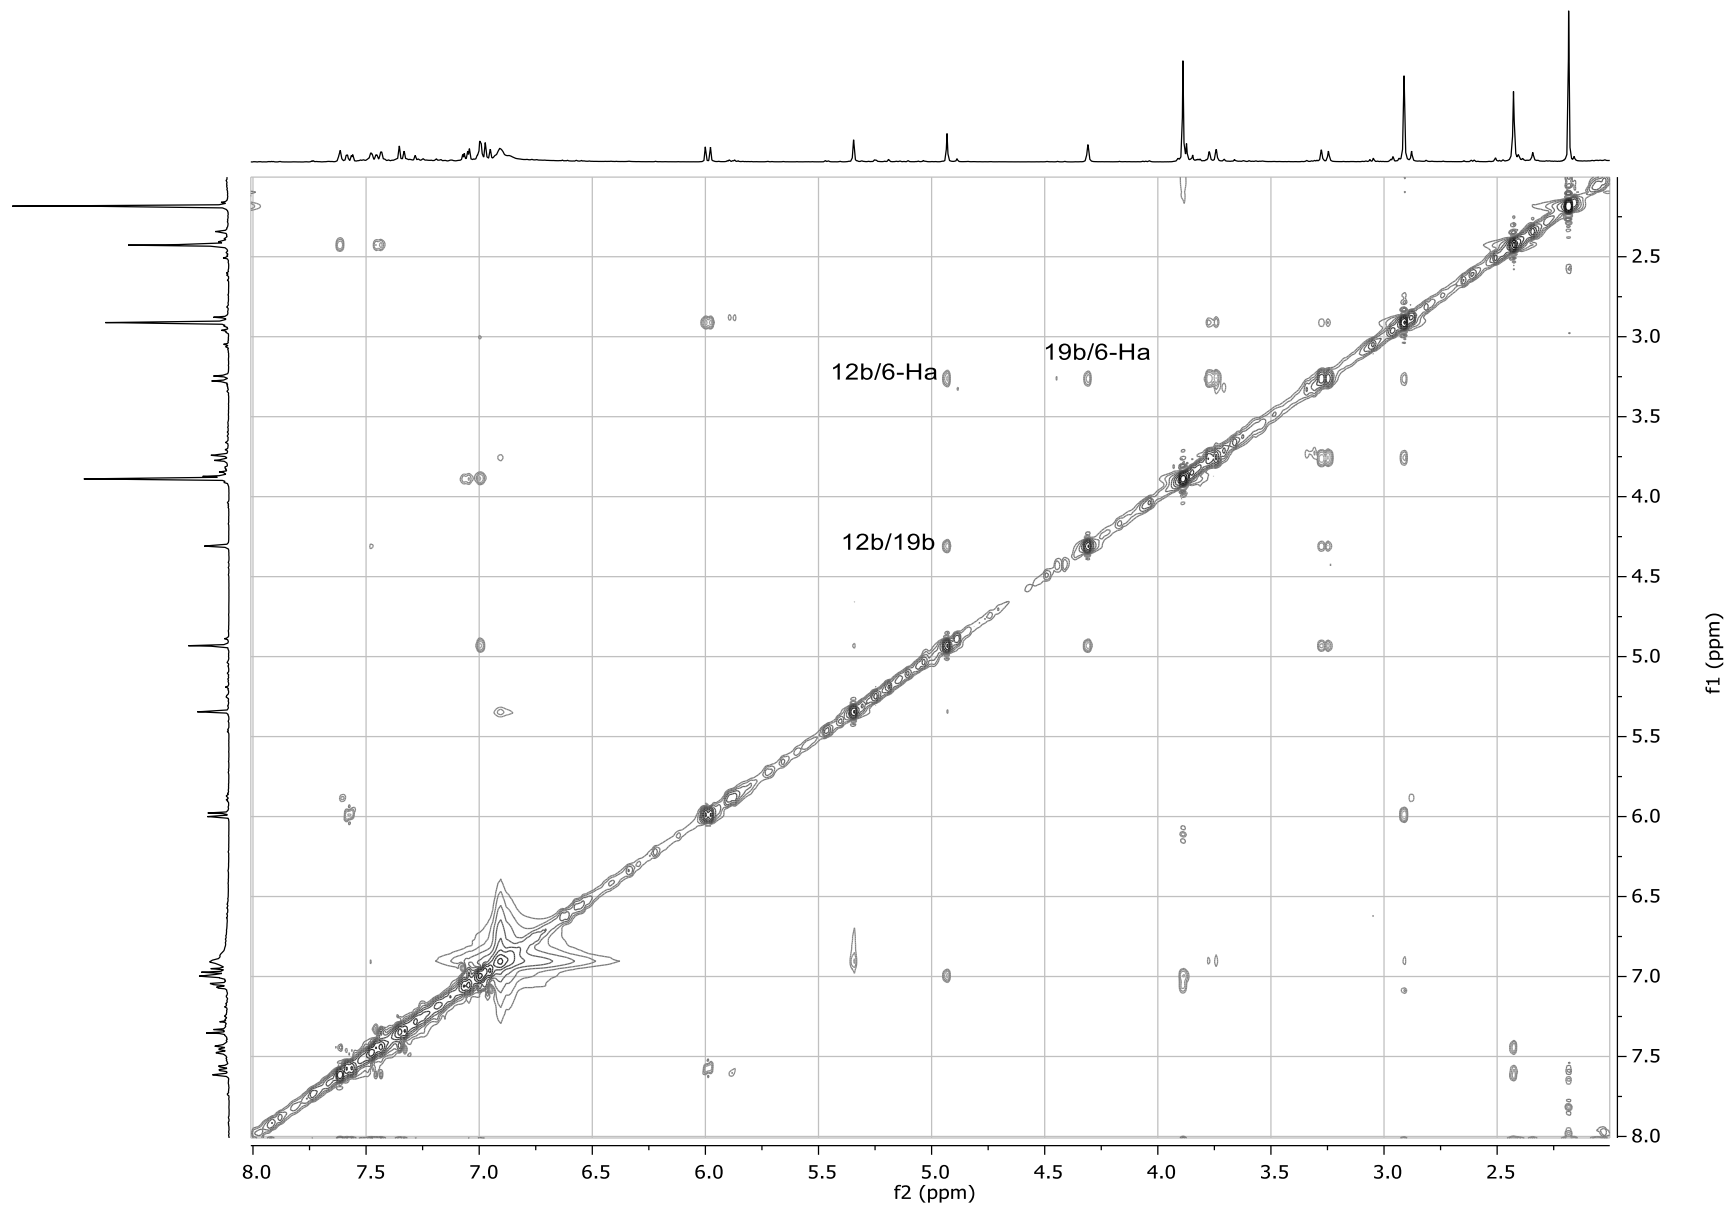

Figure S17. NOESY spectrum of (6*aS*,7*R*,12*bR*,19*bR*)-**5ba** in CDCl<sub>3</sub> at 400 MHz.

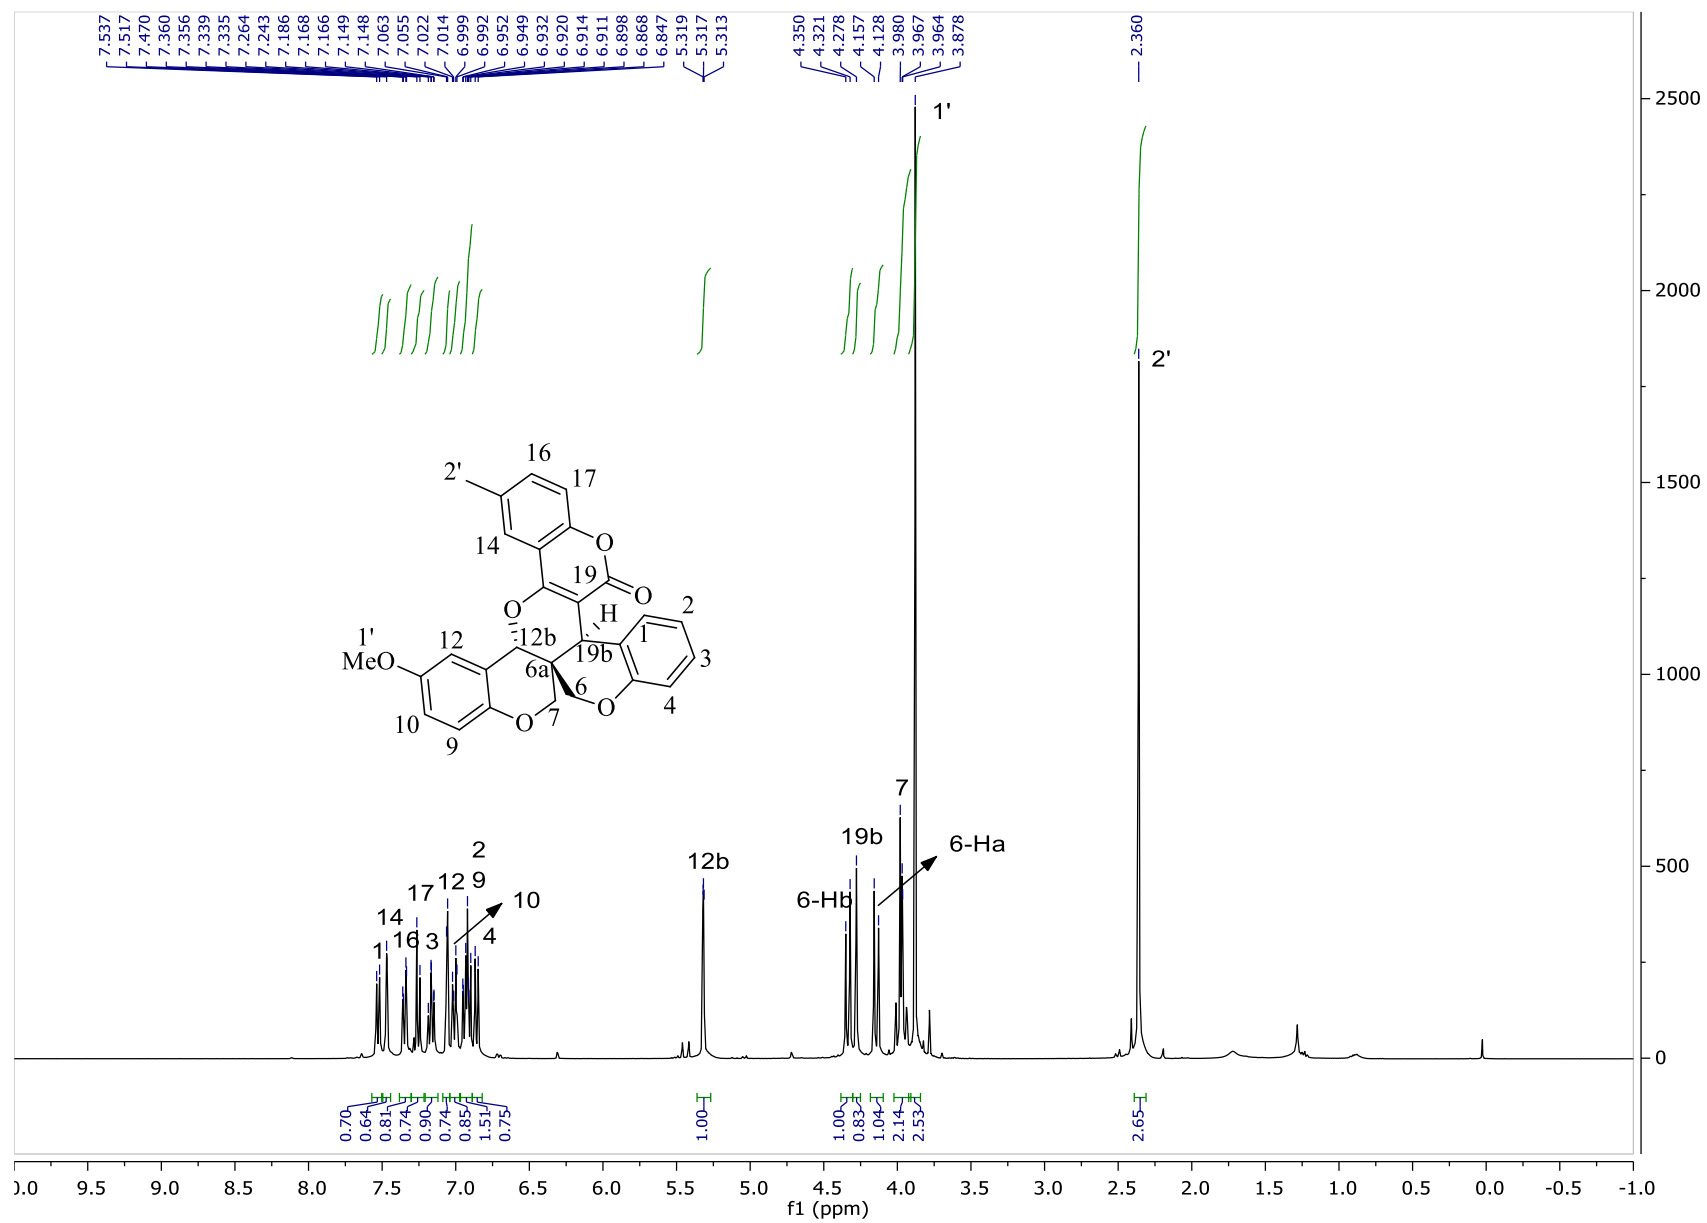

Figure S18. <sup>1</sup>H-NMR spectrum of *rac*-(6a*S*\*,12b*R*\*,19b*R*\*)-4ca in CDCl<sub>3</sub> at 400 MHz.

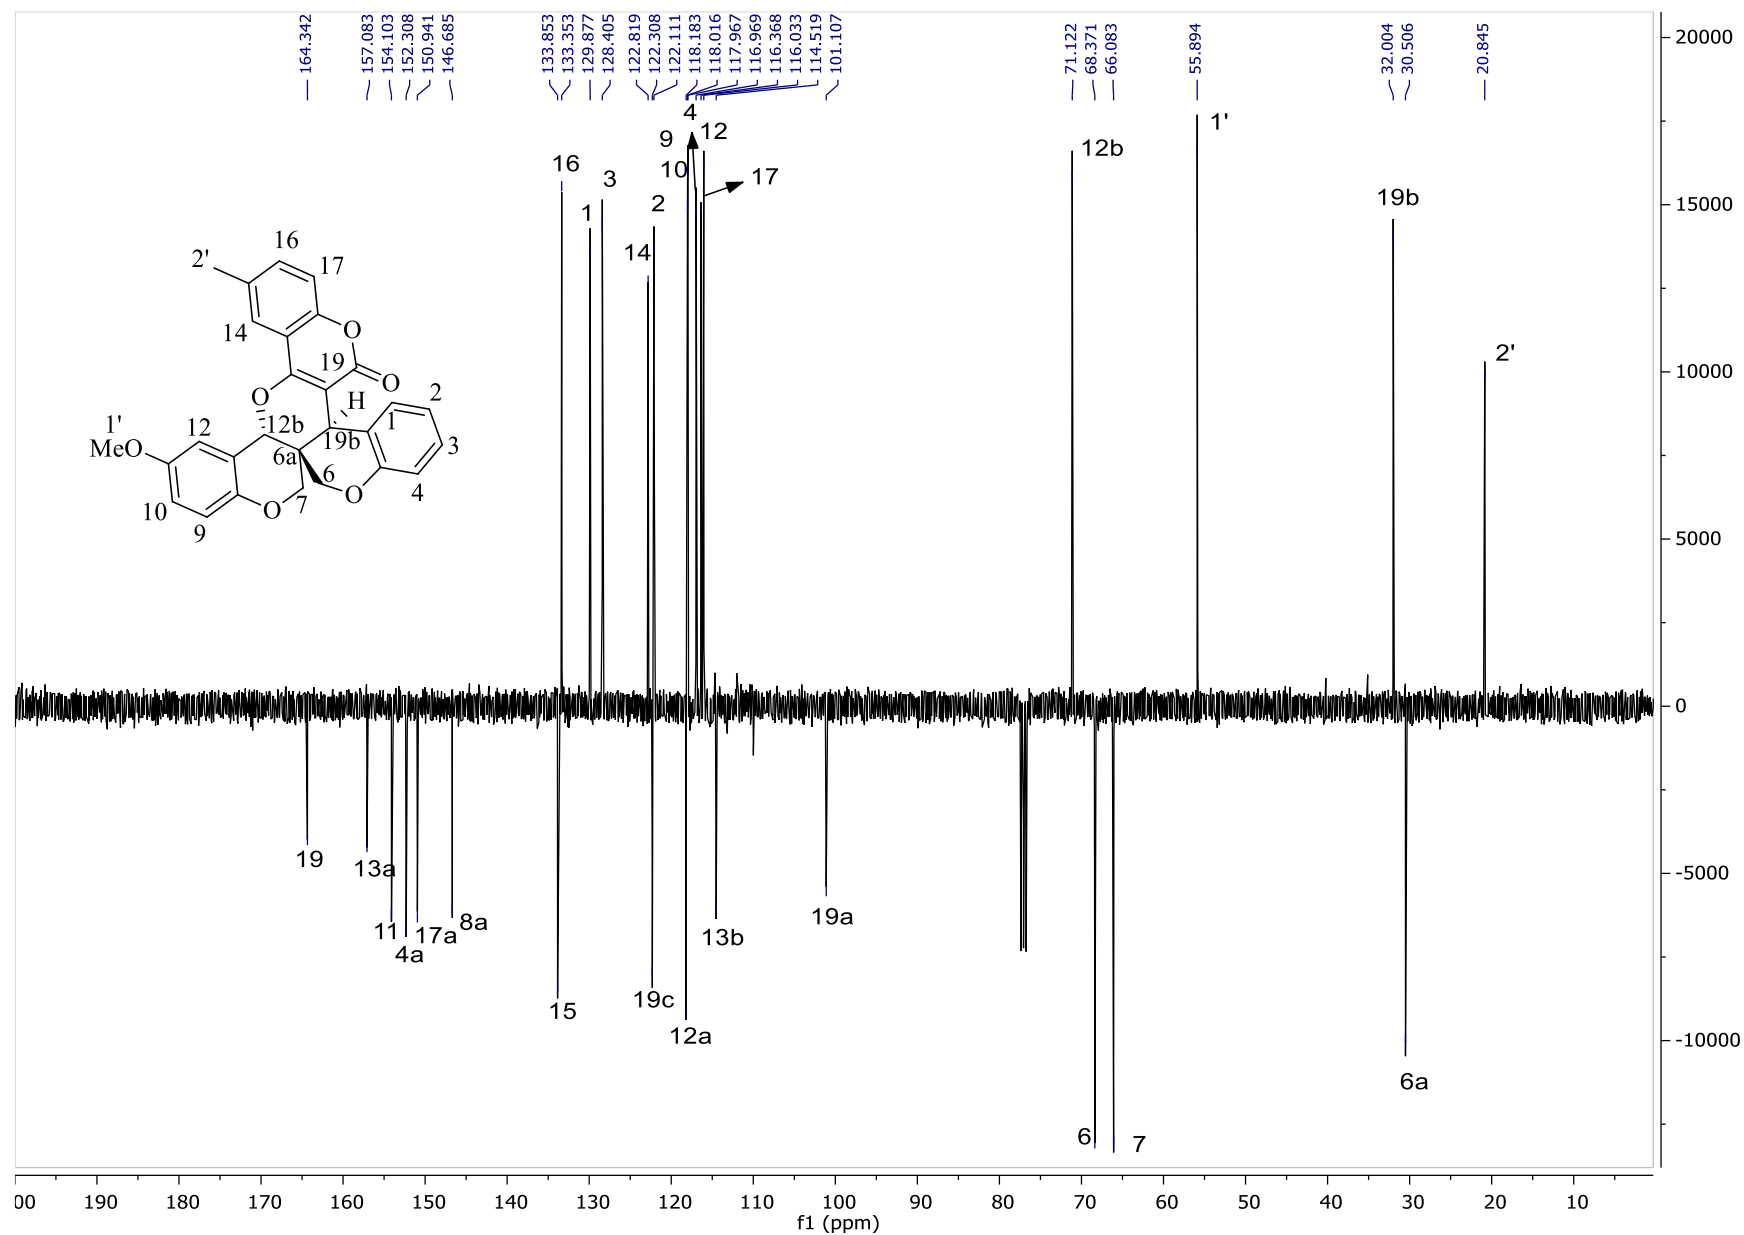

Figure S19. <sup>13</sup>C-NMR spectrum of *rac*-(6a*S*\*,12b*R*\*,19b*R*\*)-4ca in CDCl<sub>3</sub> at 100 MHz.

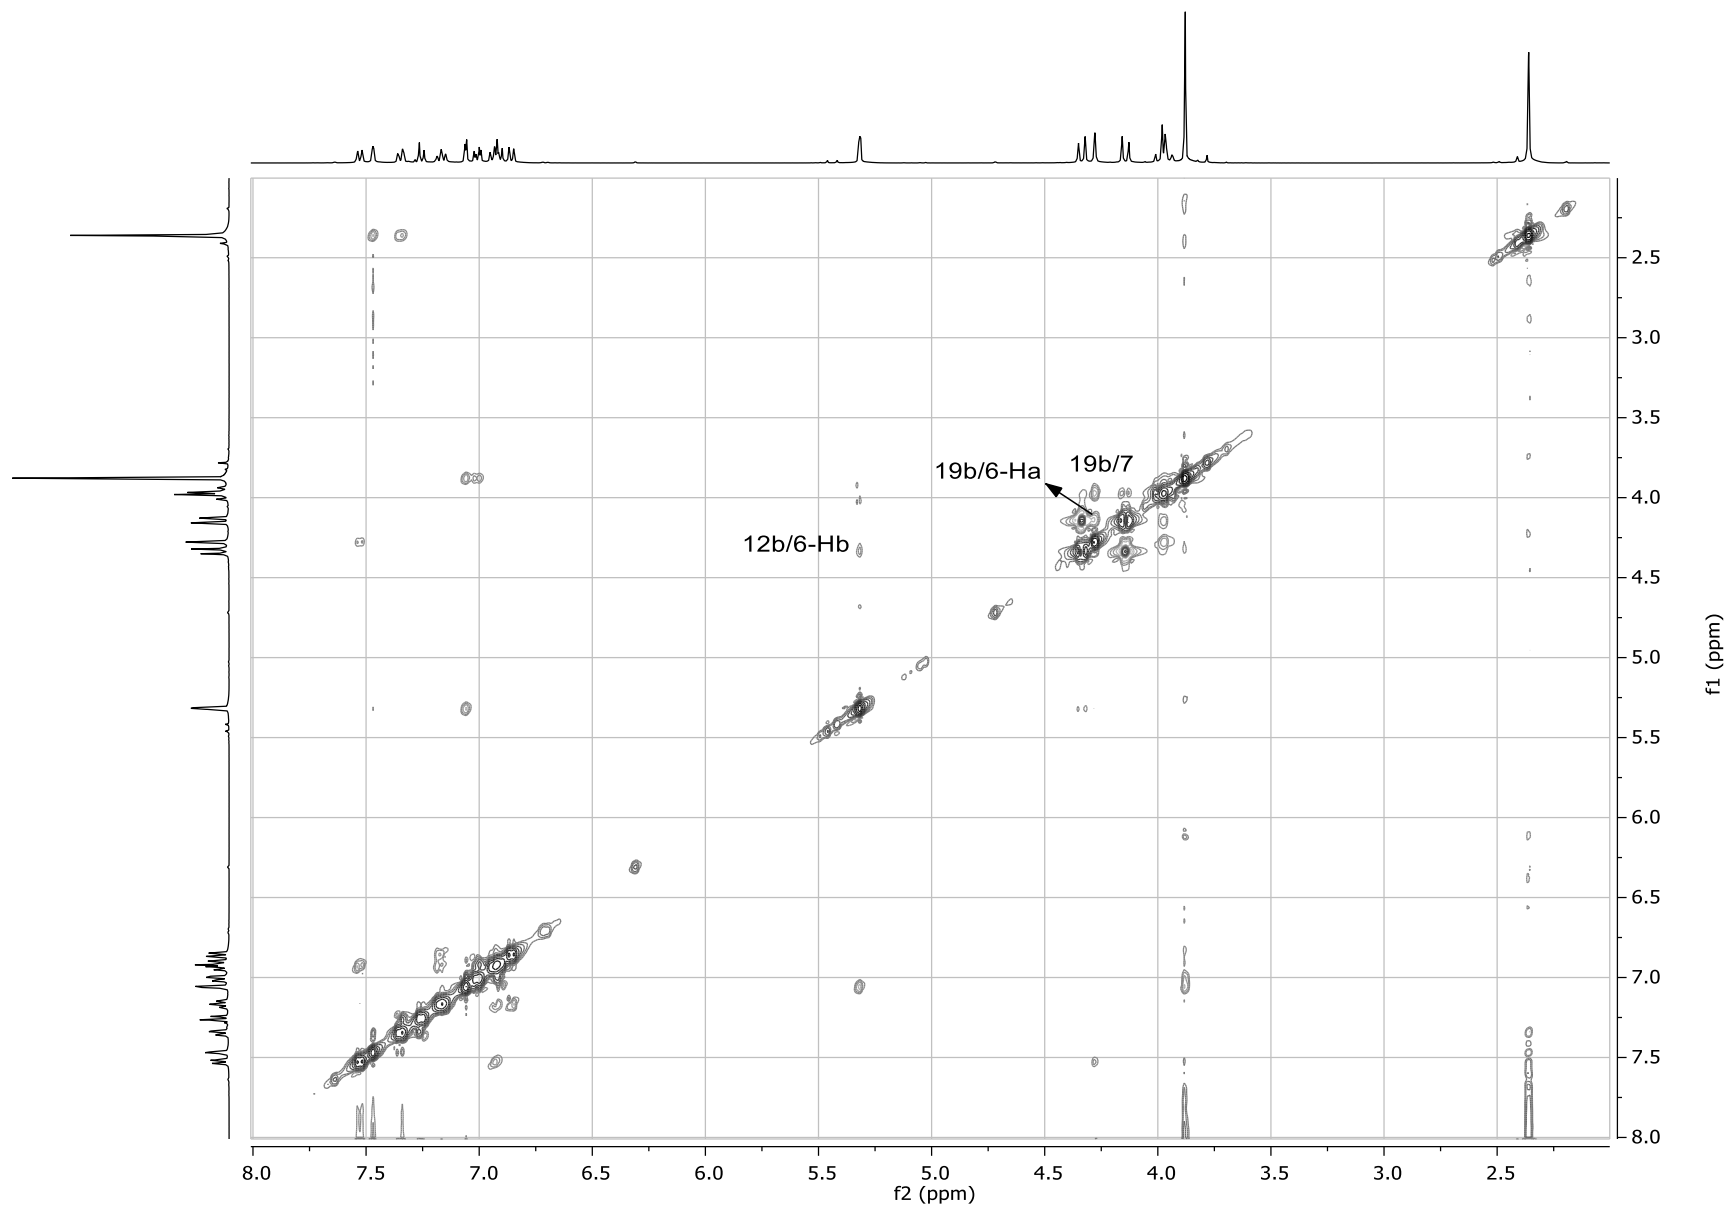

Figure S20. NOESY spectrum of *rac*-(6a*S*<sup>\*</sup>,12b*R*<sup>\*</sup>,19b*R*<sup>\*</sup>)-**4ca** in CDCl<sub>3</sub> at 400 MHz.

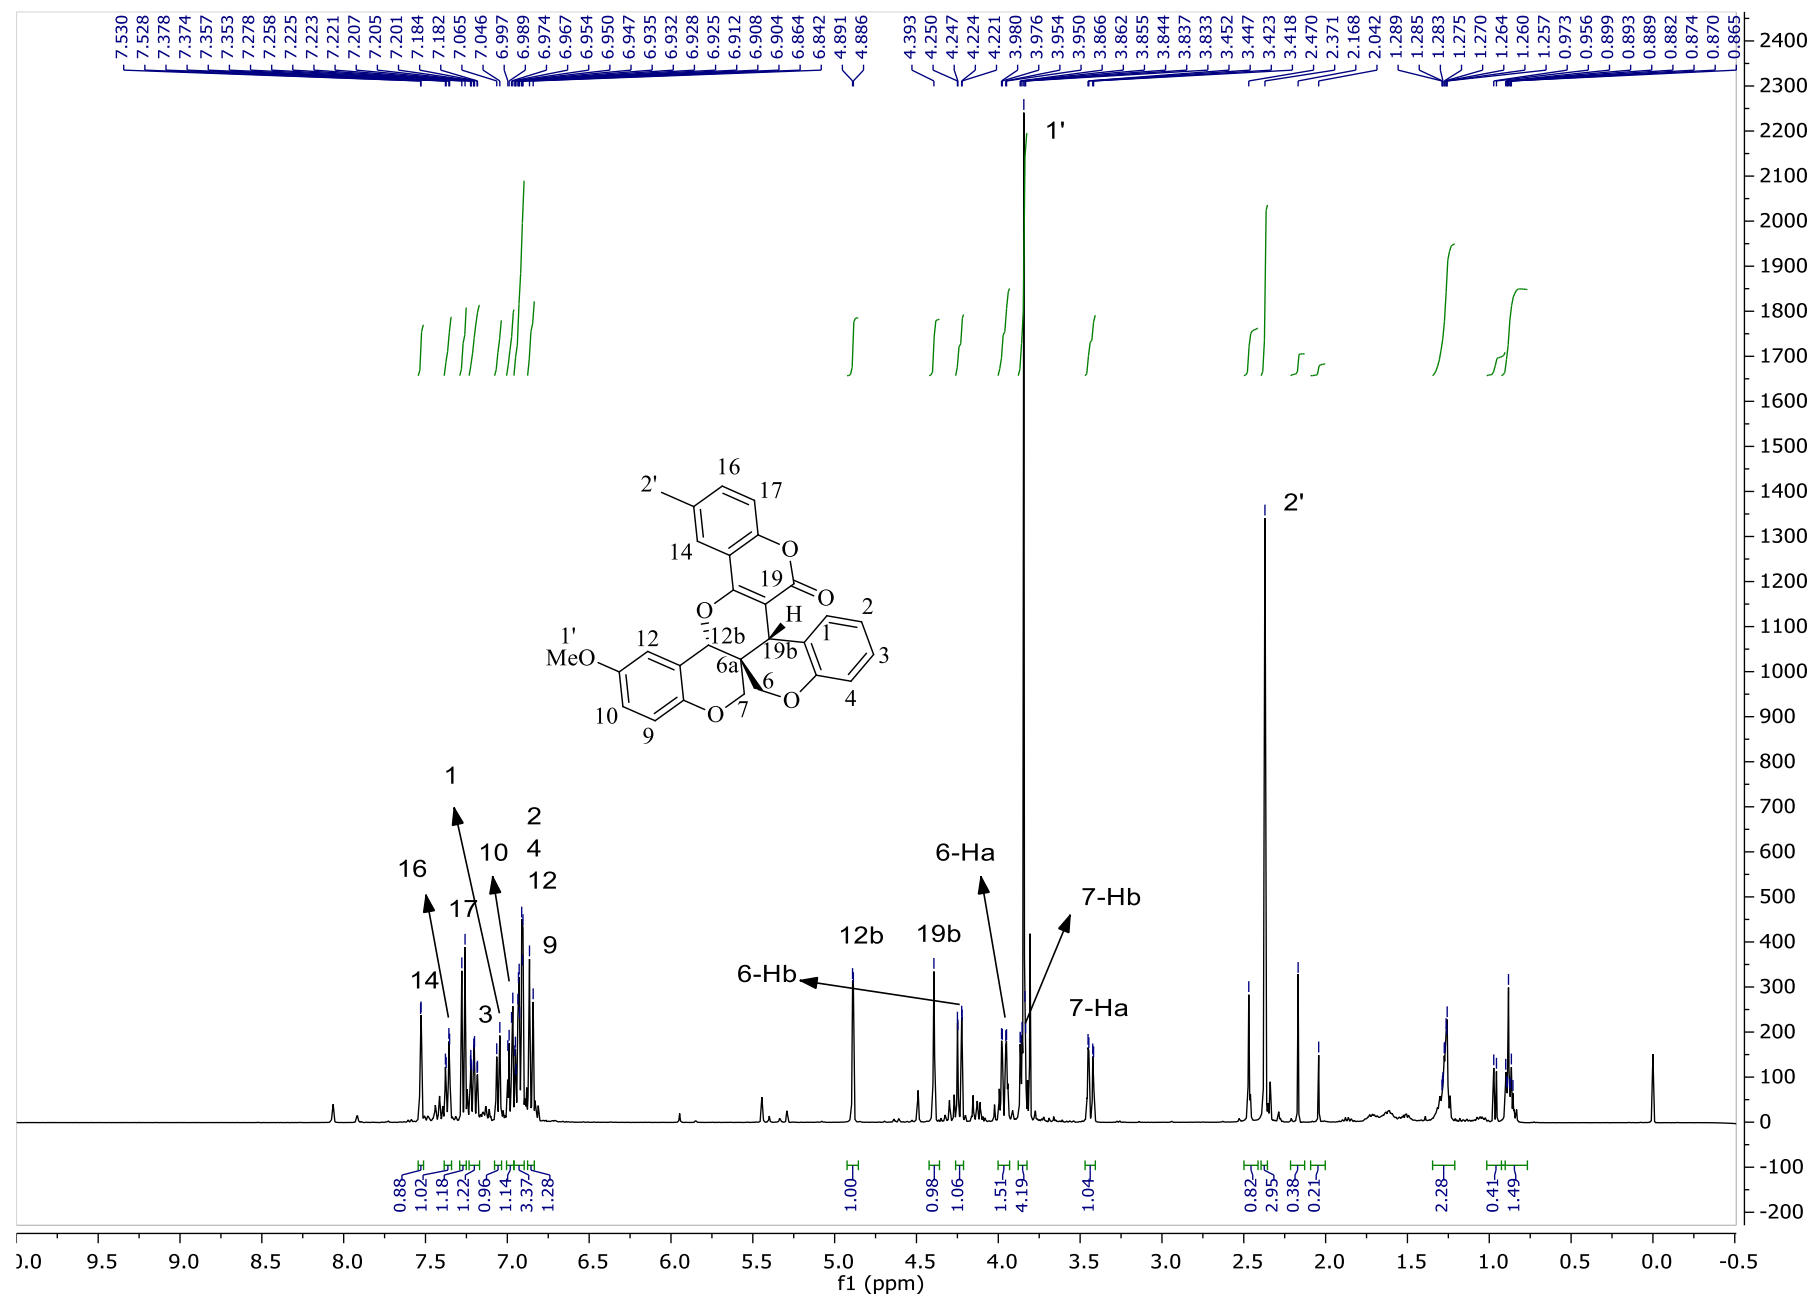

Figure S21. <sup>1</sup>H-NMR spectrum of *rac*-(6a*S*<sup>\*</sup>,12b*R*<sup>\*</sup>,19b*S*<sup>\*</sup>)-**5ca** in CDCl<sub>3</sub> at 400 MHz.

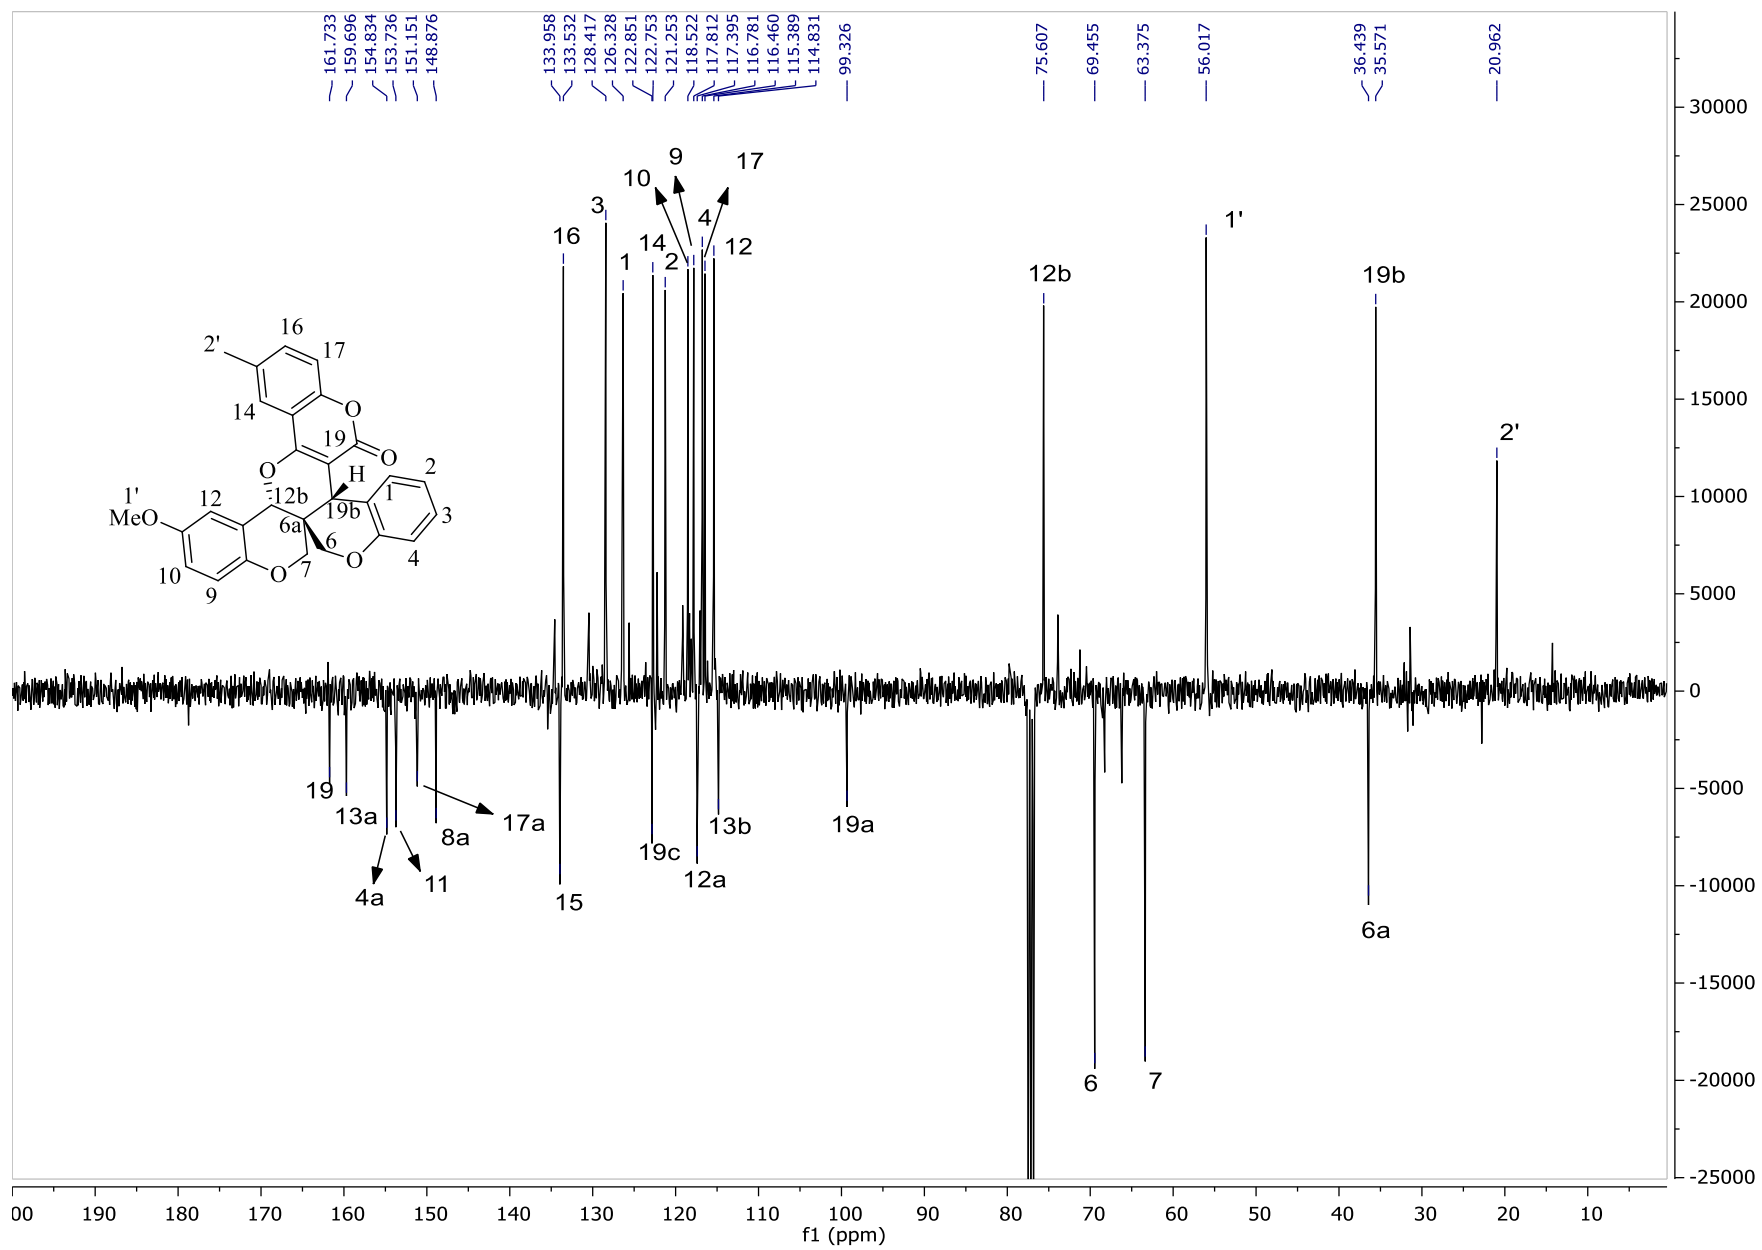

Figure S22. <sup>13</sup>C-NMR spectrum of *rac*-(6a*S*\*,12b*R*\*,19b*S*\*)-5ca in CDCl<sub>3</sub> at 100 MHz.

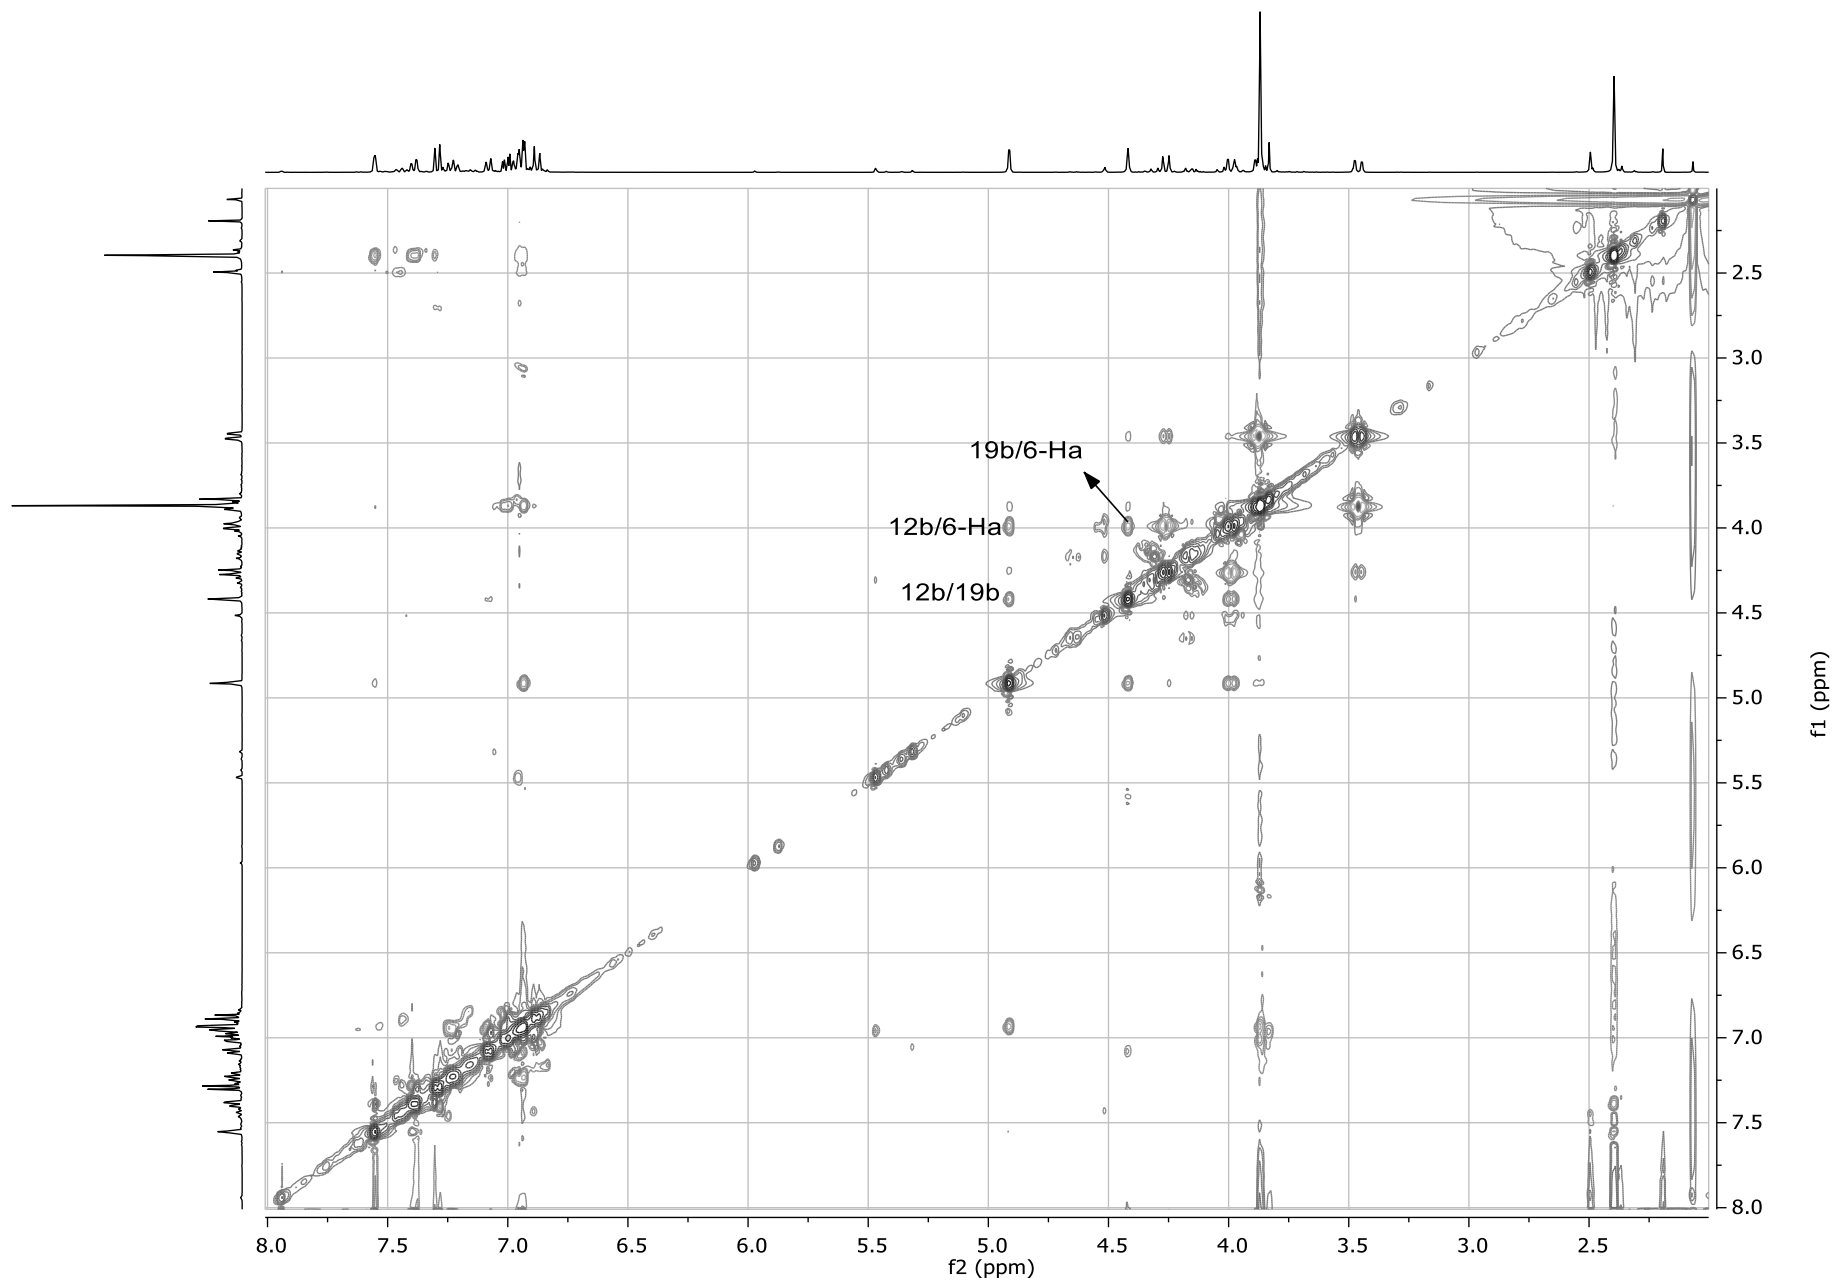

Figure S23. NOESY spectrum of *rac*-(6a*S*<sup>\*</sup>,12b*R*<sup>\*</sup>,19b*S*<sup>\*</sup>)-**5ca** in CDCl<sub>3</sub> at 400 MHz.

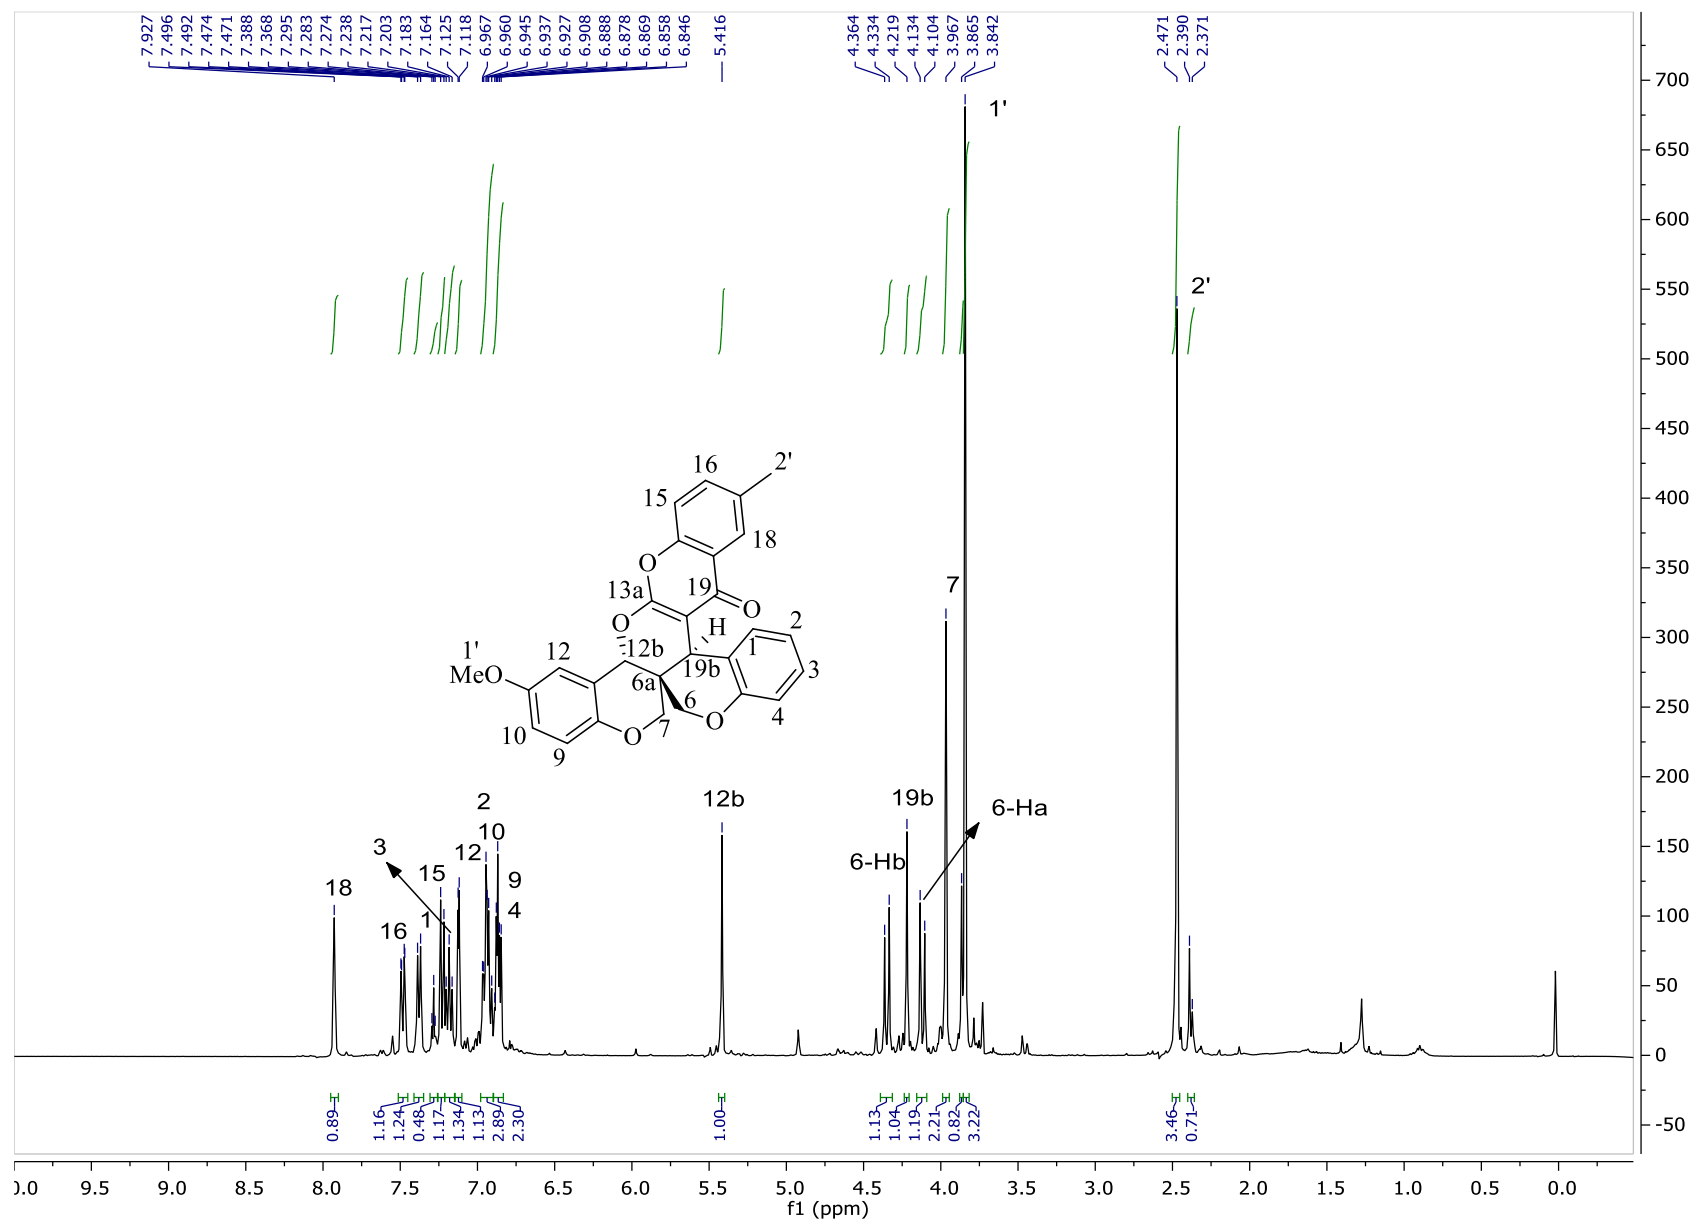

Figure S24. <sup>1</sup>H-NMR spectrum of *rac*-(6a*S*\*,12b*R*\*,19b*R*\*)-6ca in CDCl<sub>3</sub> at 400 MHz.

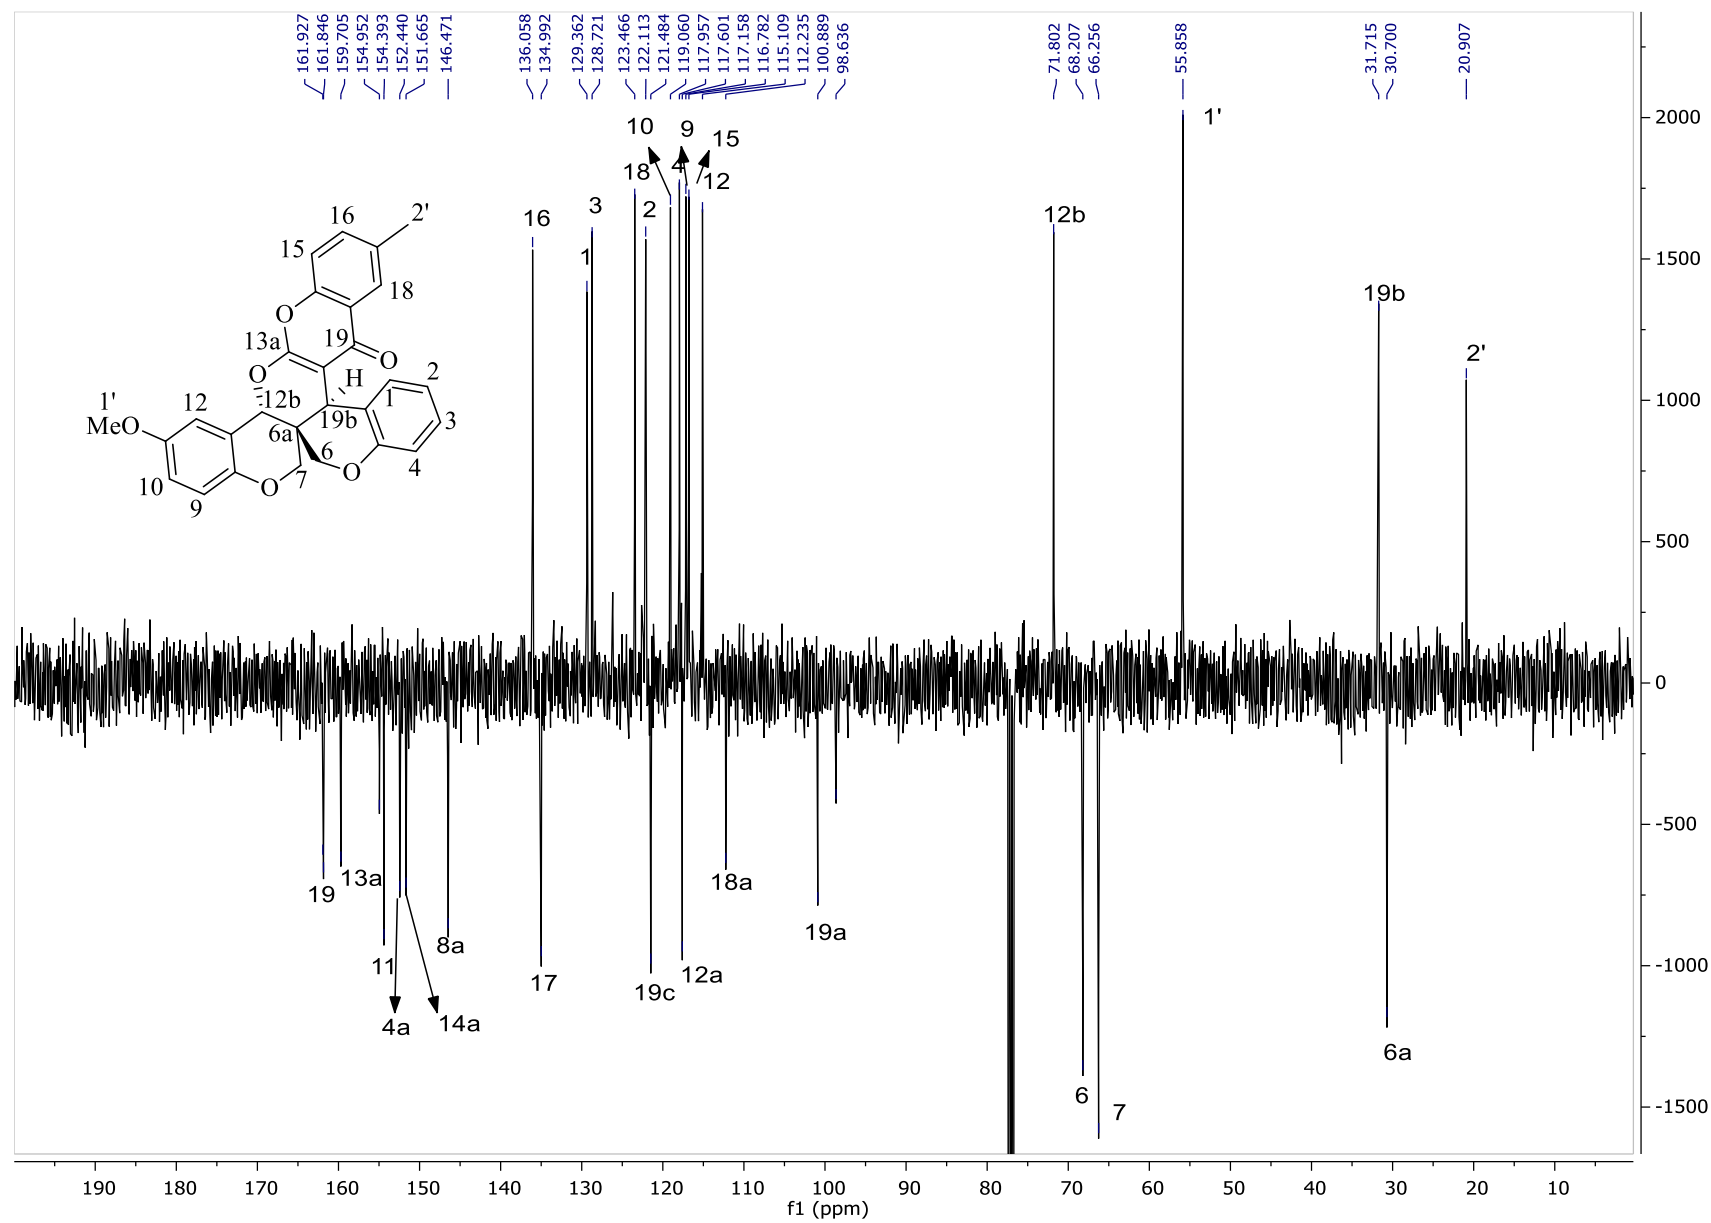

Figure S25. <sup>13</sup>C-NMR spectrum of *rac*-(6a*S*<sup>\*</sup>,12b*R*<sup>\*</sup>,19b*R*<sup>\*</sup>)-**6ca** in CDCl<sub>3</sub> at 100 MHz.

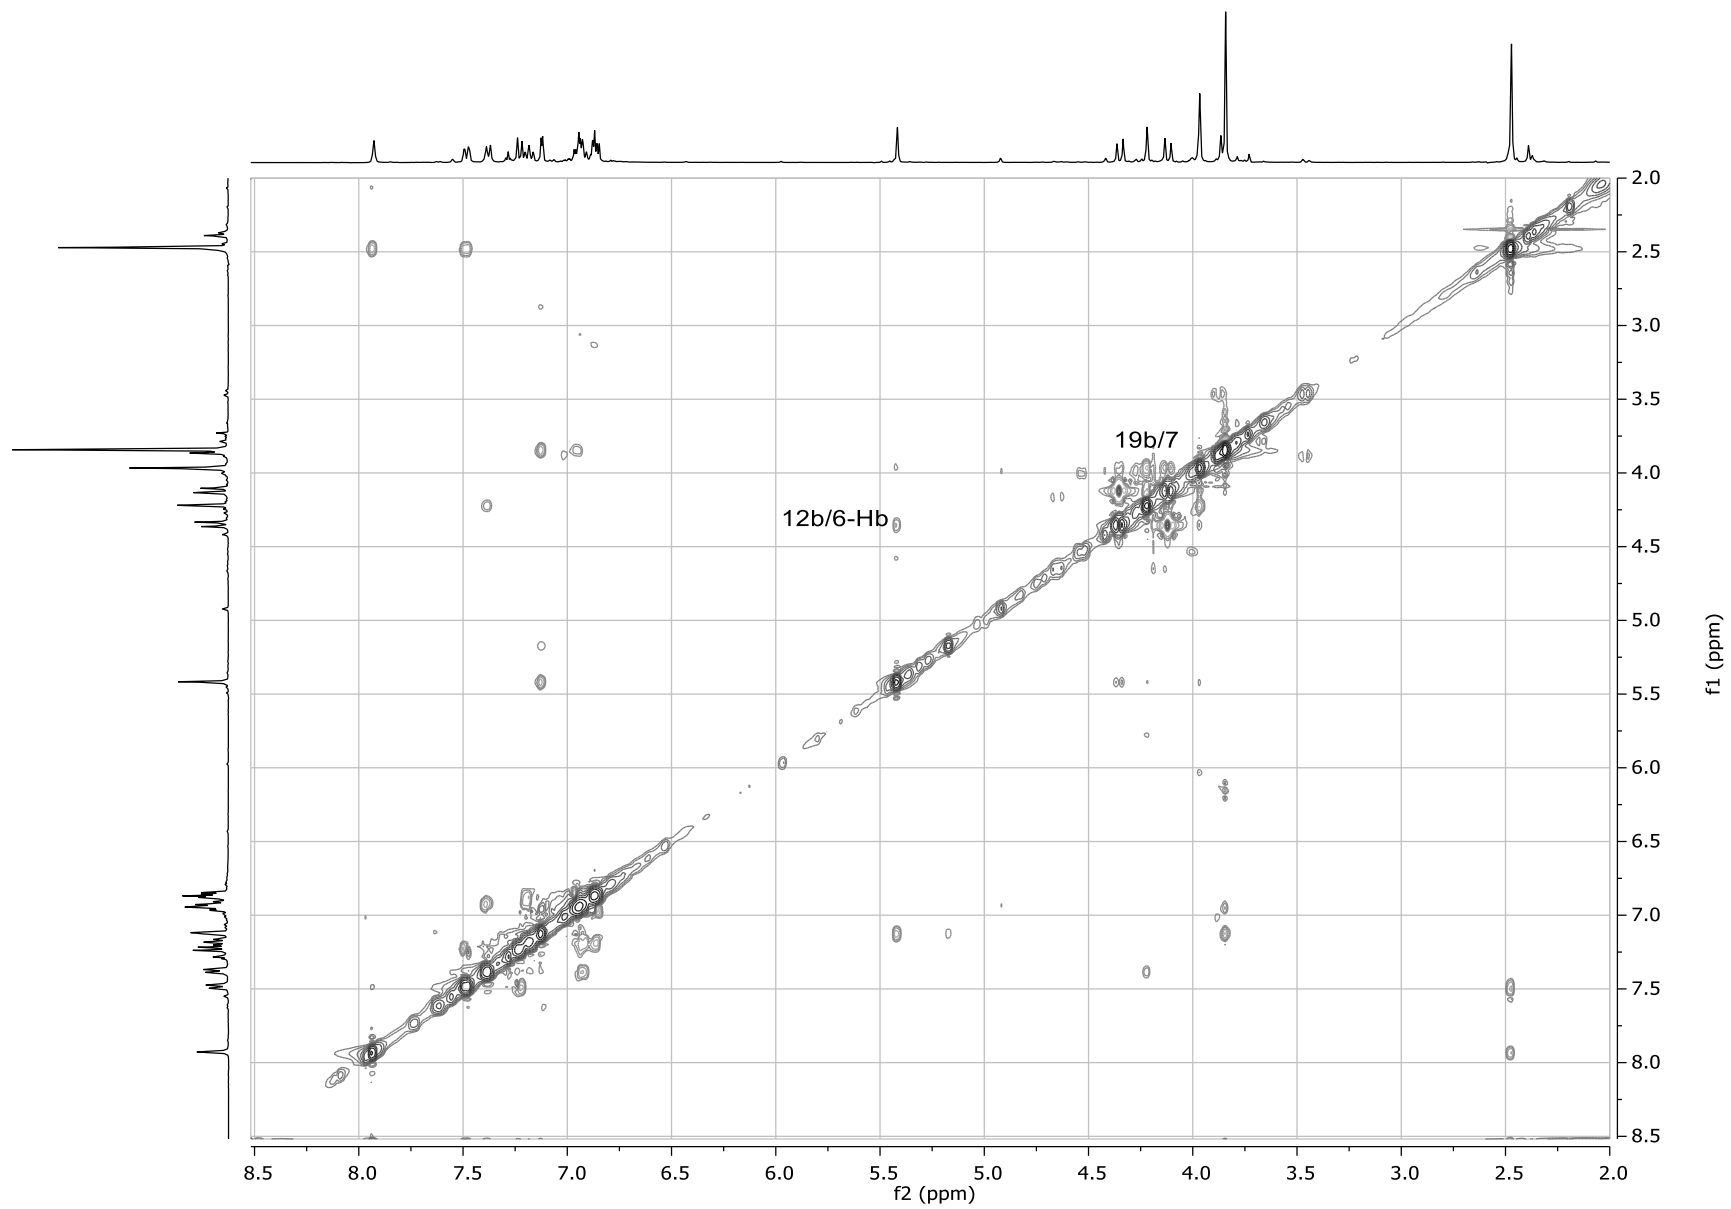

Figure S26. NOESY spectrum of *rac*-(6a*S*\*,12b*R*\*,19b*R*\*)-**6ca** in CDCl<sub>3</sub> at 400 MHz.

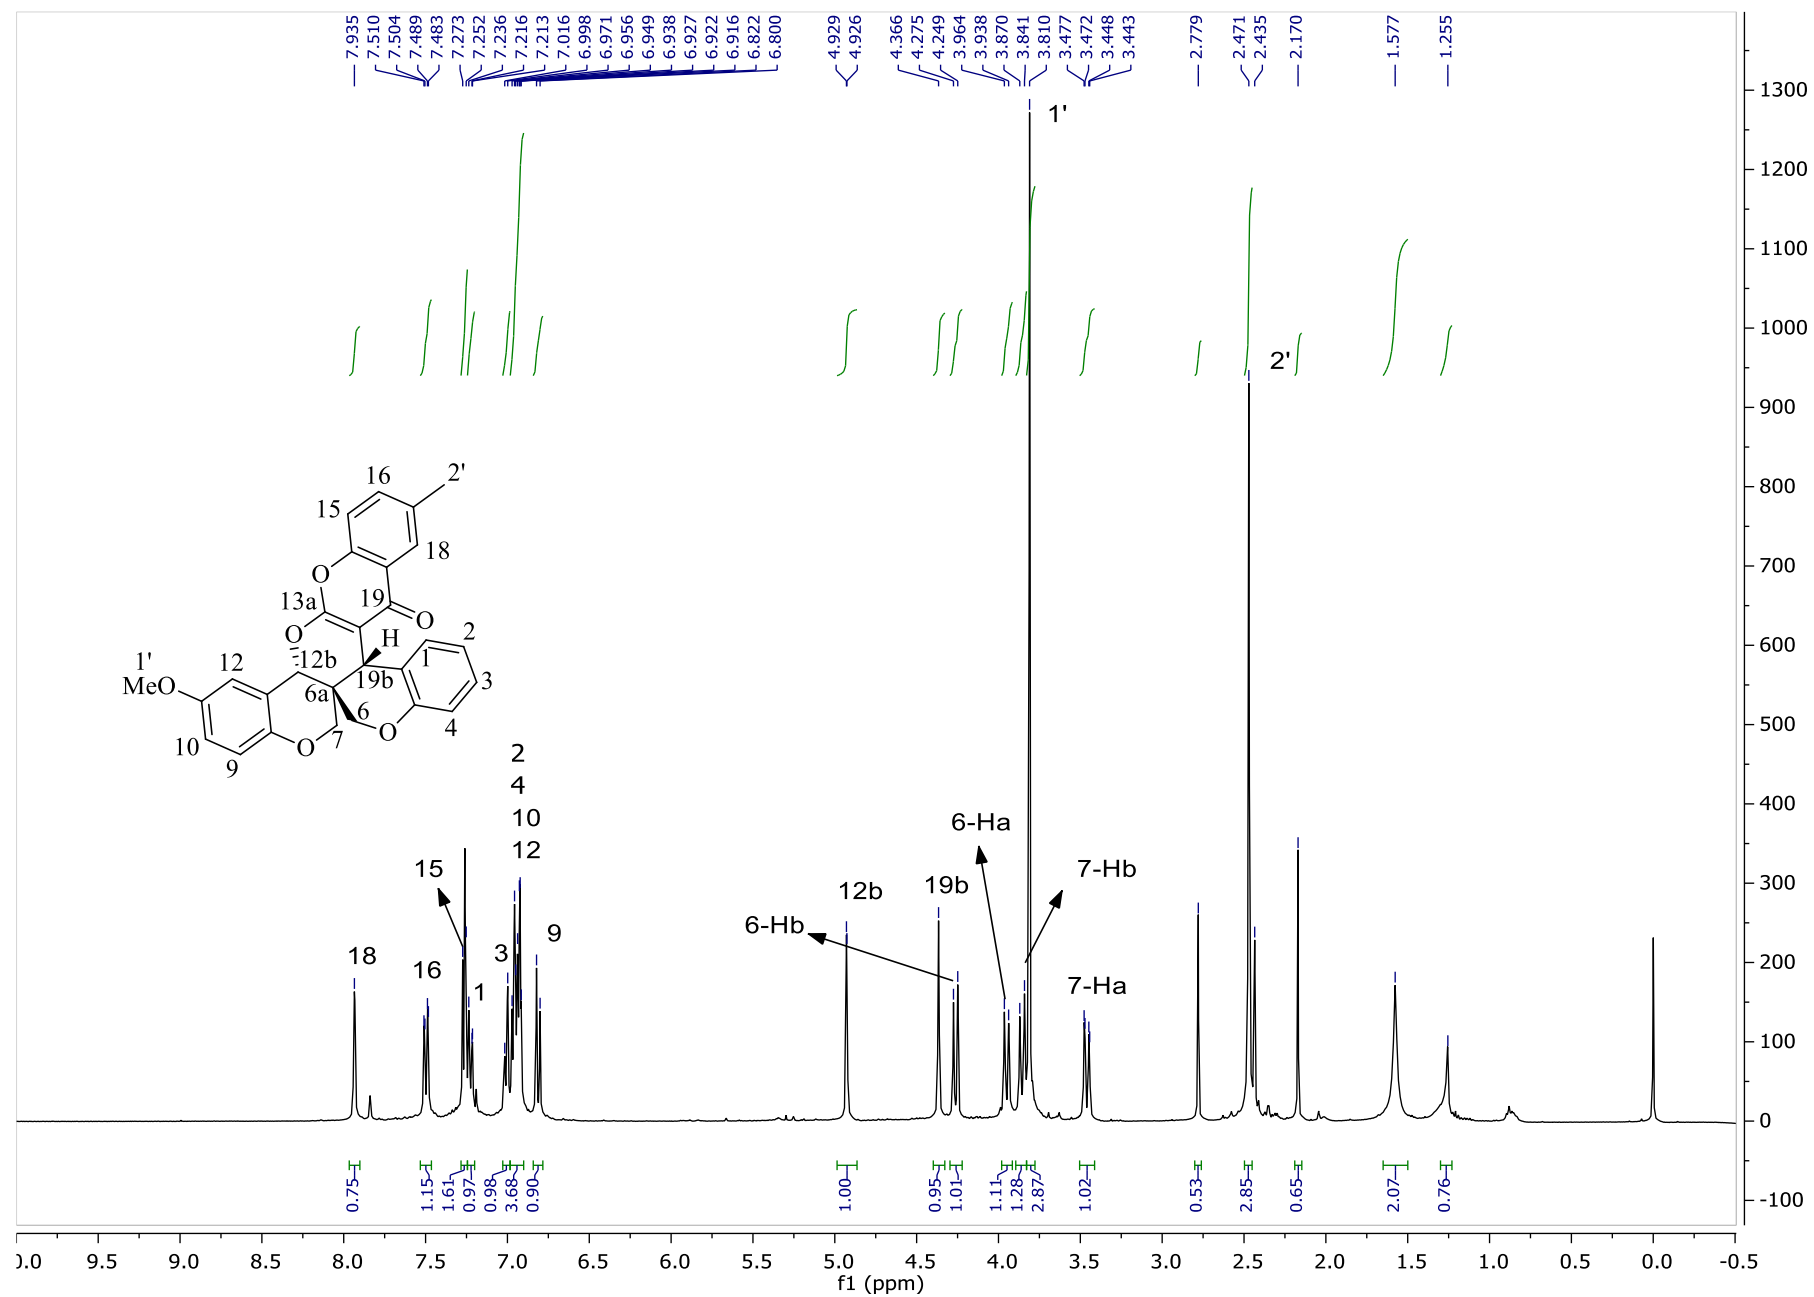

Figure S27. <sup>1</sup>H-NMR spectrum of *rac*-(6a*S*<sup>\*</sup>,12b*R*<sup>\*</sup>,19b*S*<sup>\*</sup>)-**7ca** in CDCl<sub>3</sub> at 400 MHz.

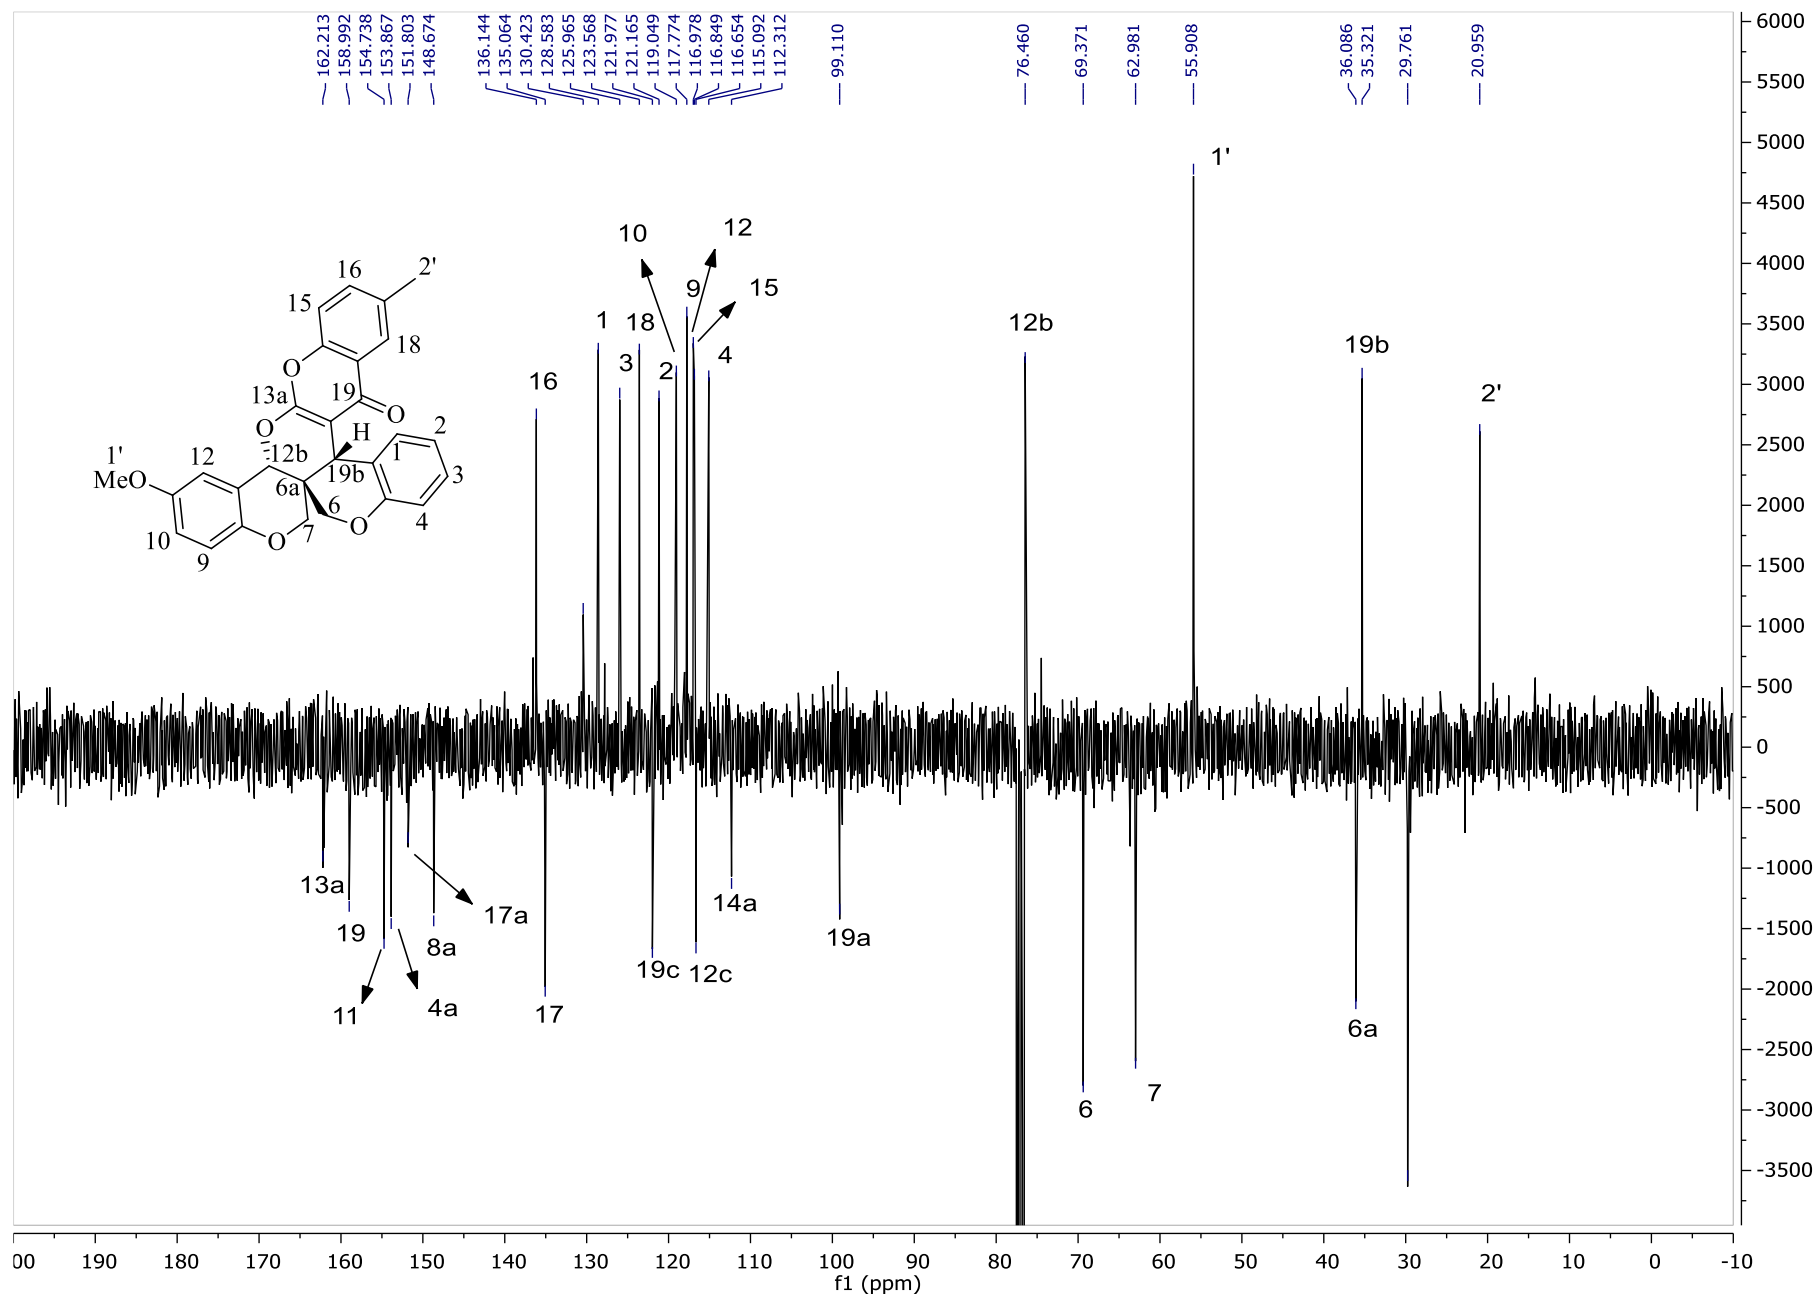

Figure S28.  $^{13}\text{C}$ -NMR spectrum of *rac*-(6a*S*\*,12b*R*\*,19b*S*\*)-7ca in  $\text{CDCl}_3$  at 90 MHz.

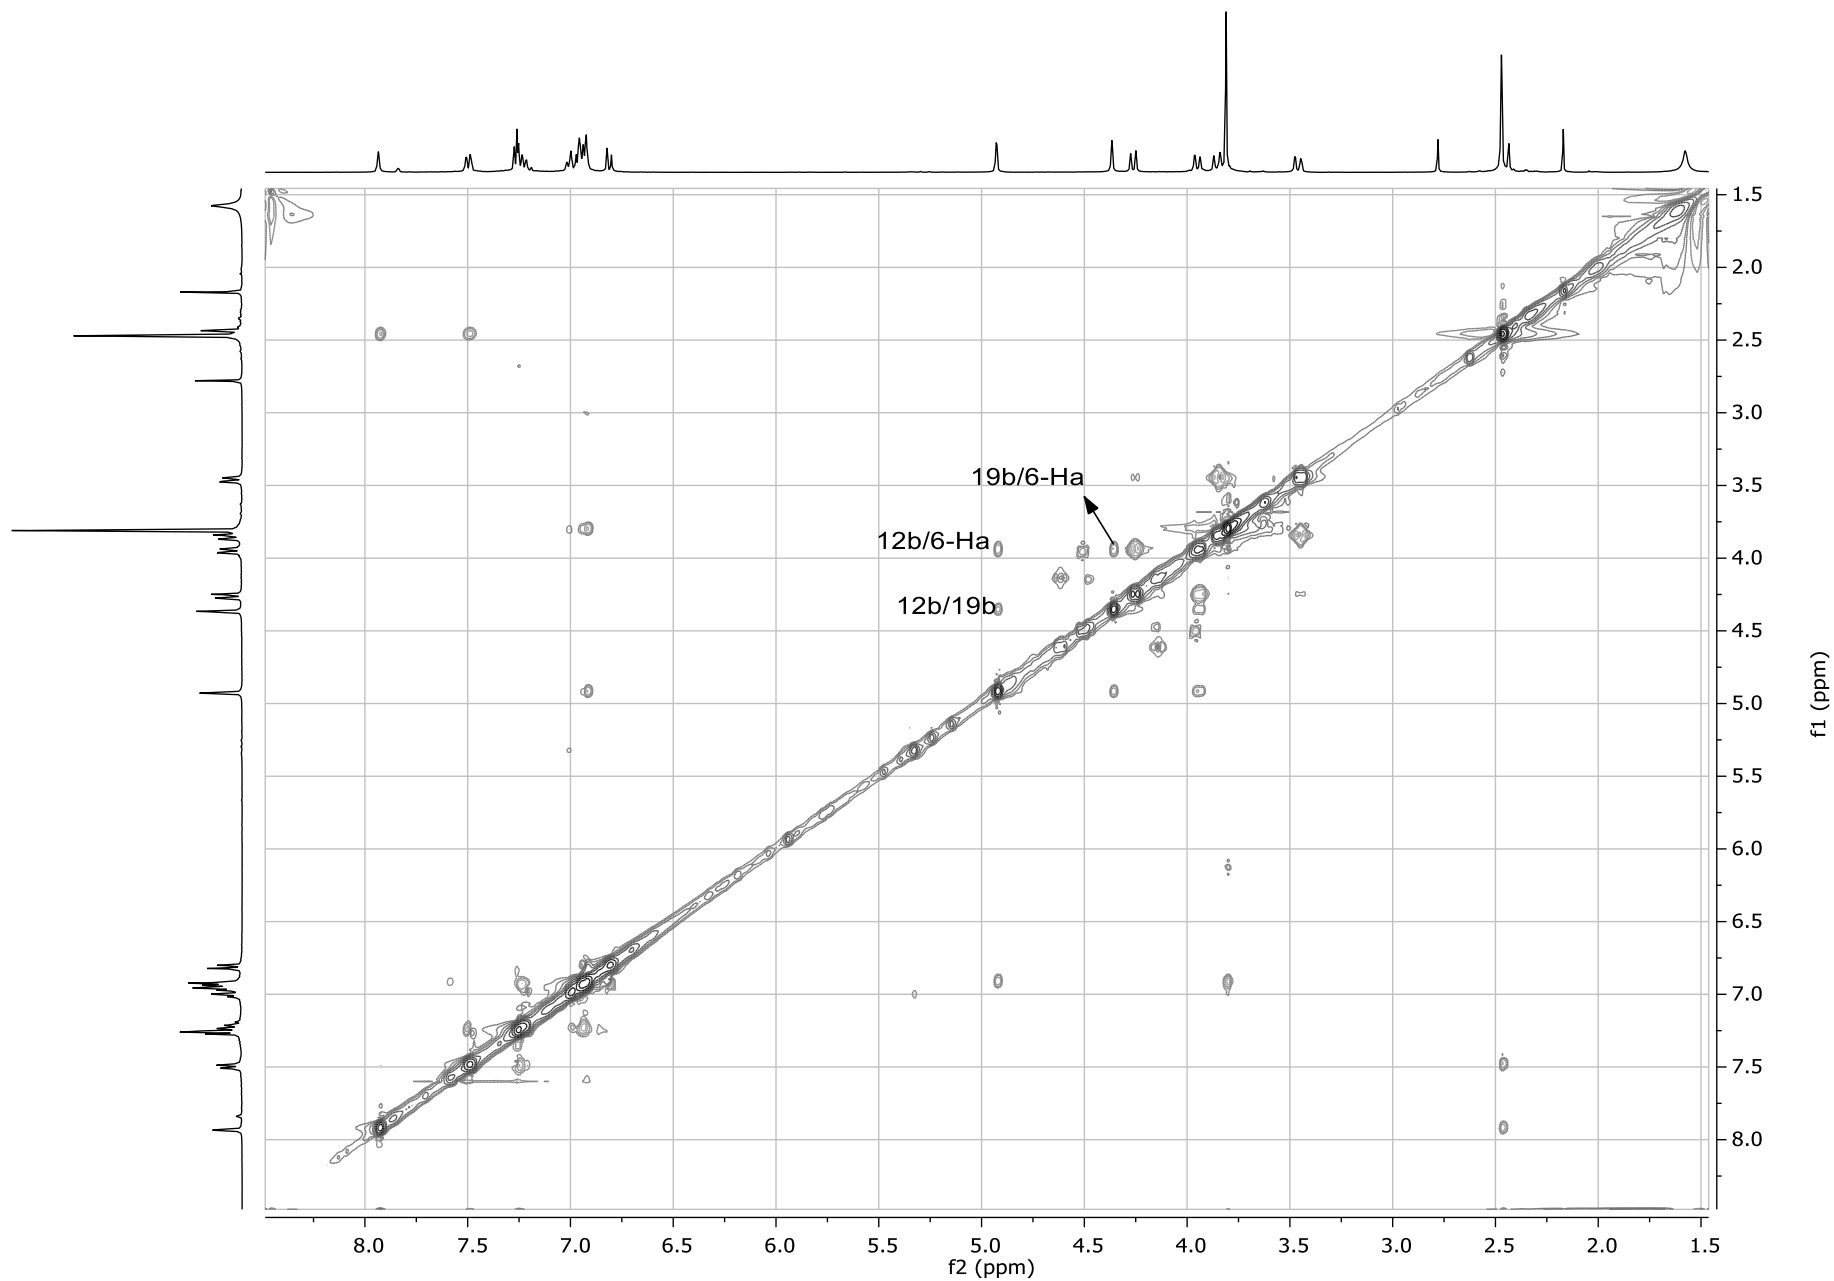

Figure S29. NOESY spectrum of *rac*-(6a*S*<sup>\*</sup>,12b*R*<sup>\*</sup>,19b*S*<sup>\*</sup>)-**7ca** in  $\text{CDCl}_3$  at 400 MHz.

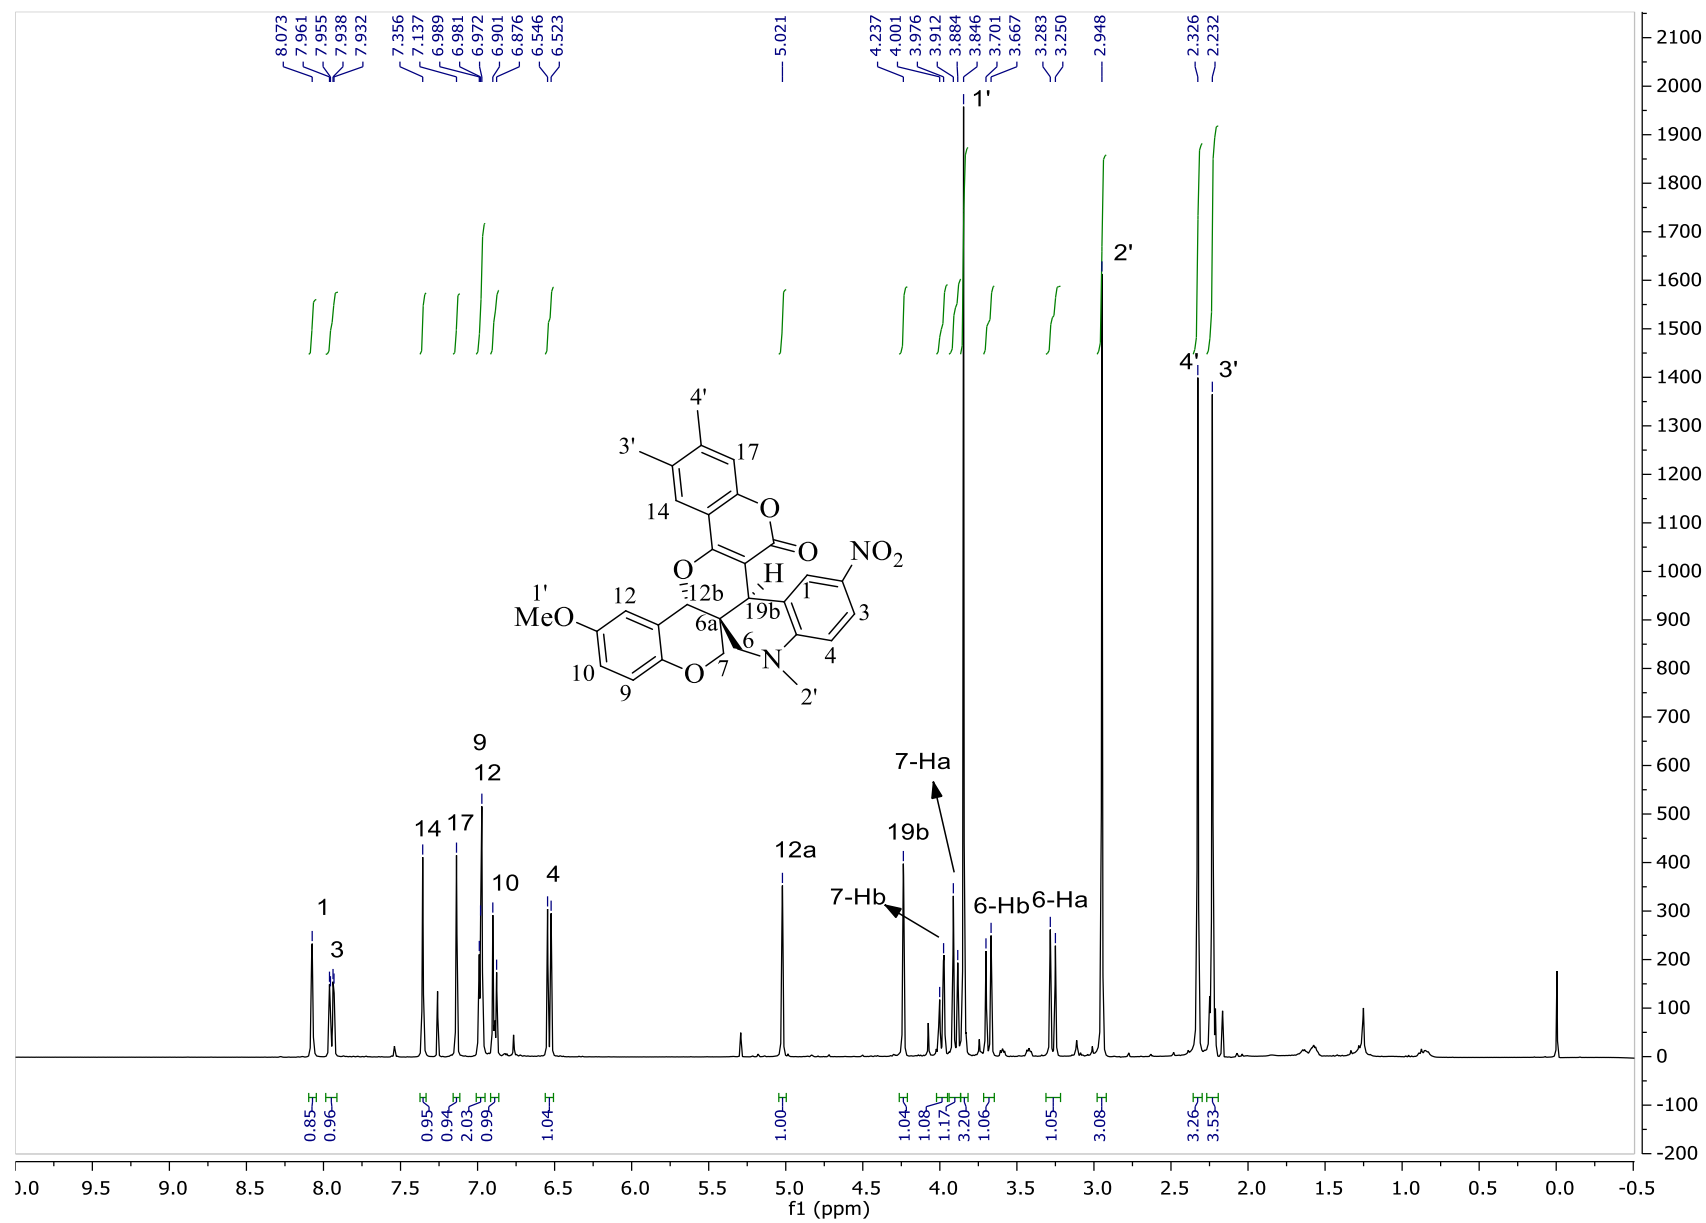

Figure S30. <sup>1</sup>H-NMR spectrum of *rac*-(6a*S*\*,12b*R*\*,19b*S*\*)-4ab in CDCl<sub>3</sub> at 400 MHz.

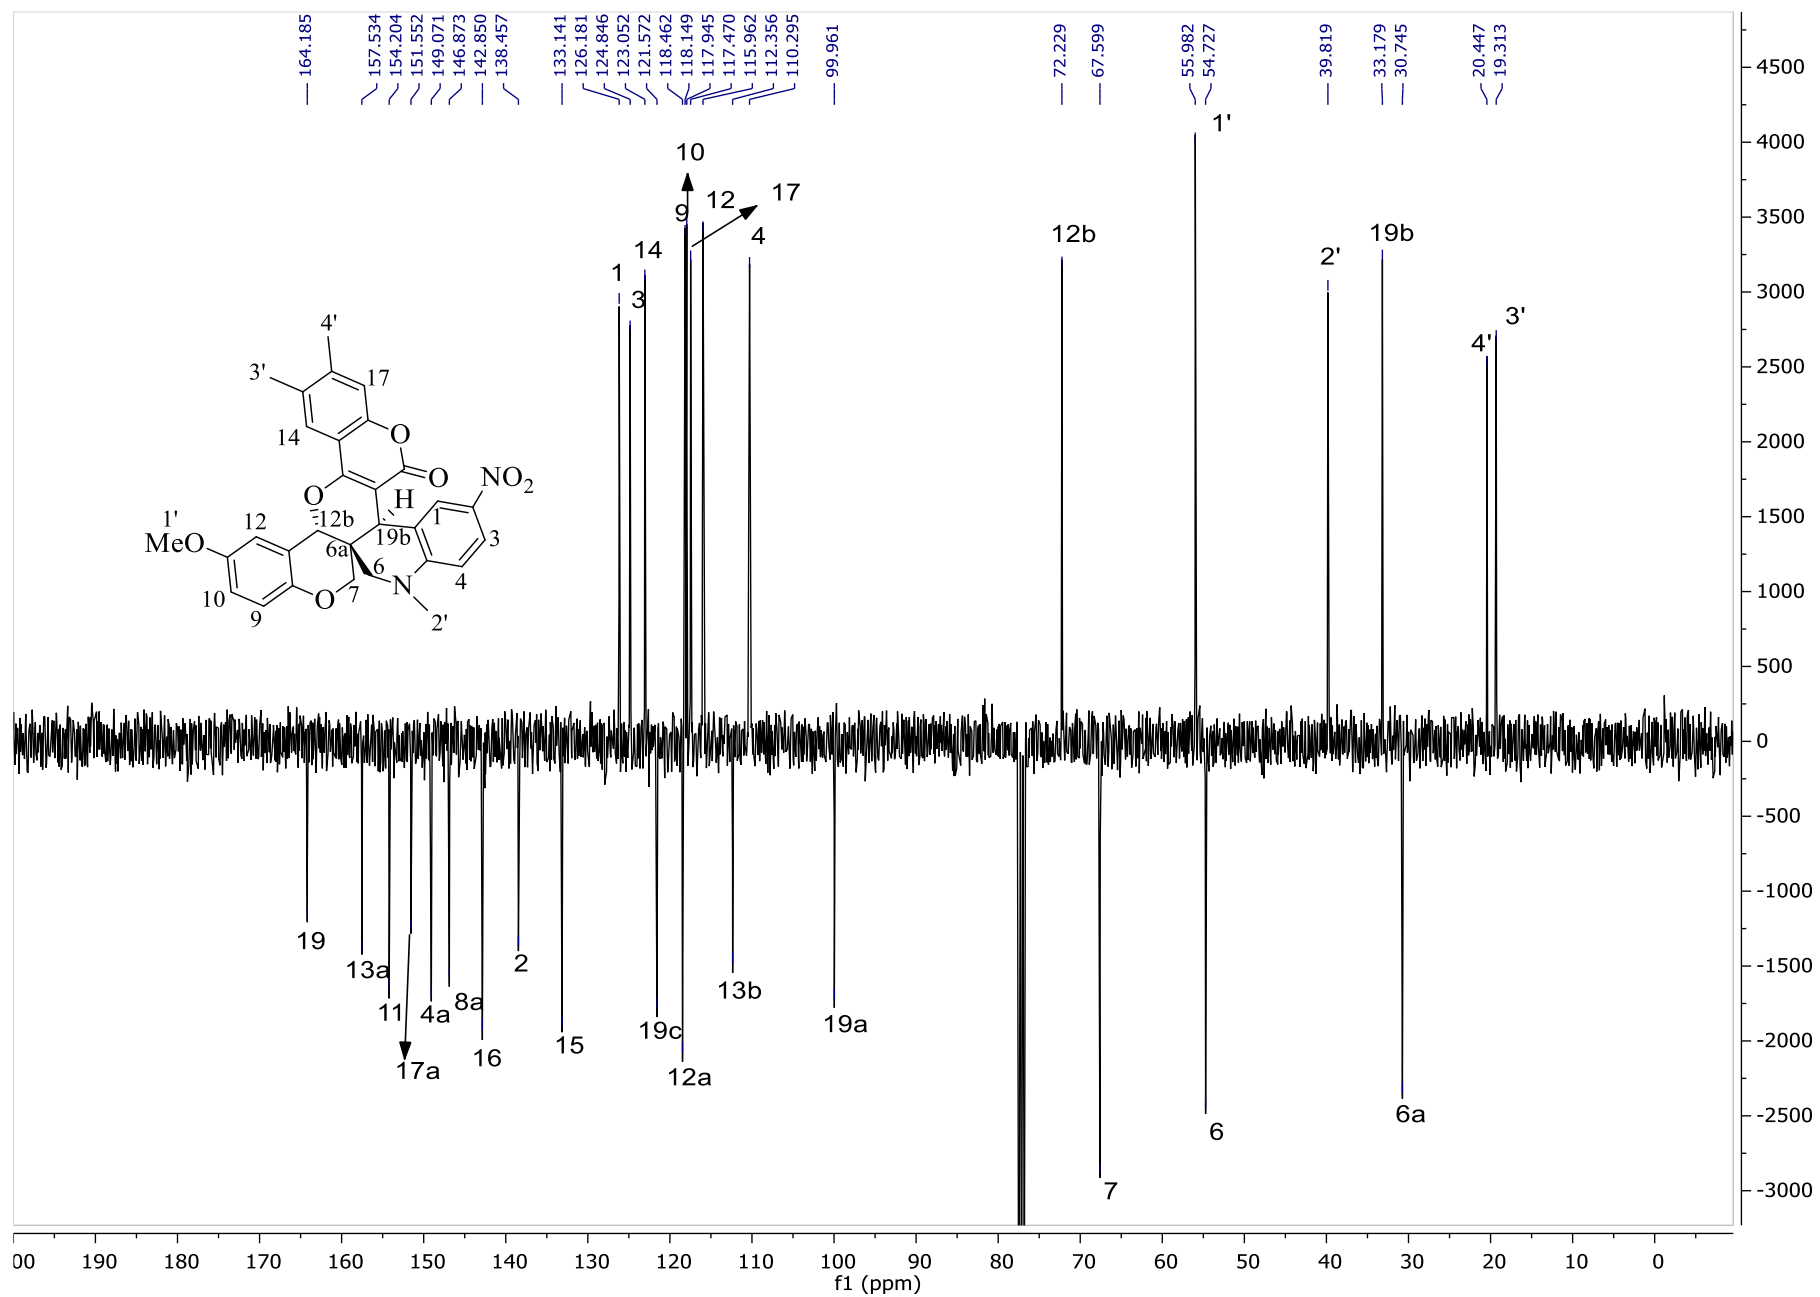

Figure S31. <sup>13</sup>C-NMR spectrum of *rac*-(6a*S*\*,12b*R*\*,19b*S*\*)-**4ab** in CDCl<sub>3</sub> at 100 MHz.

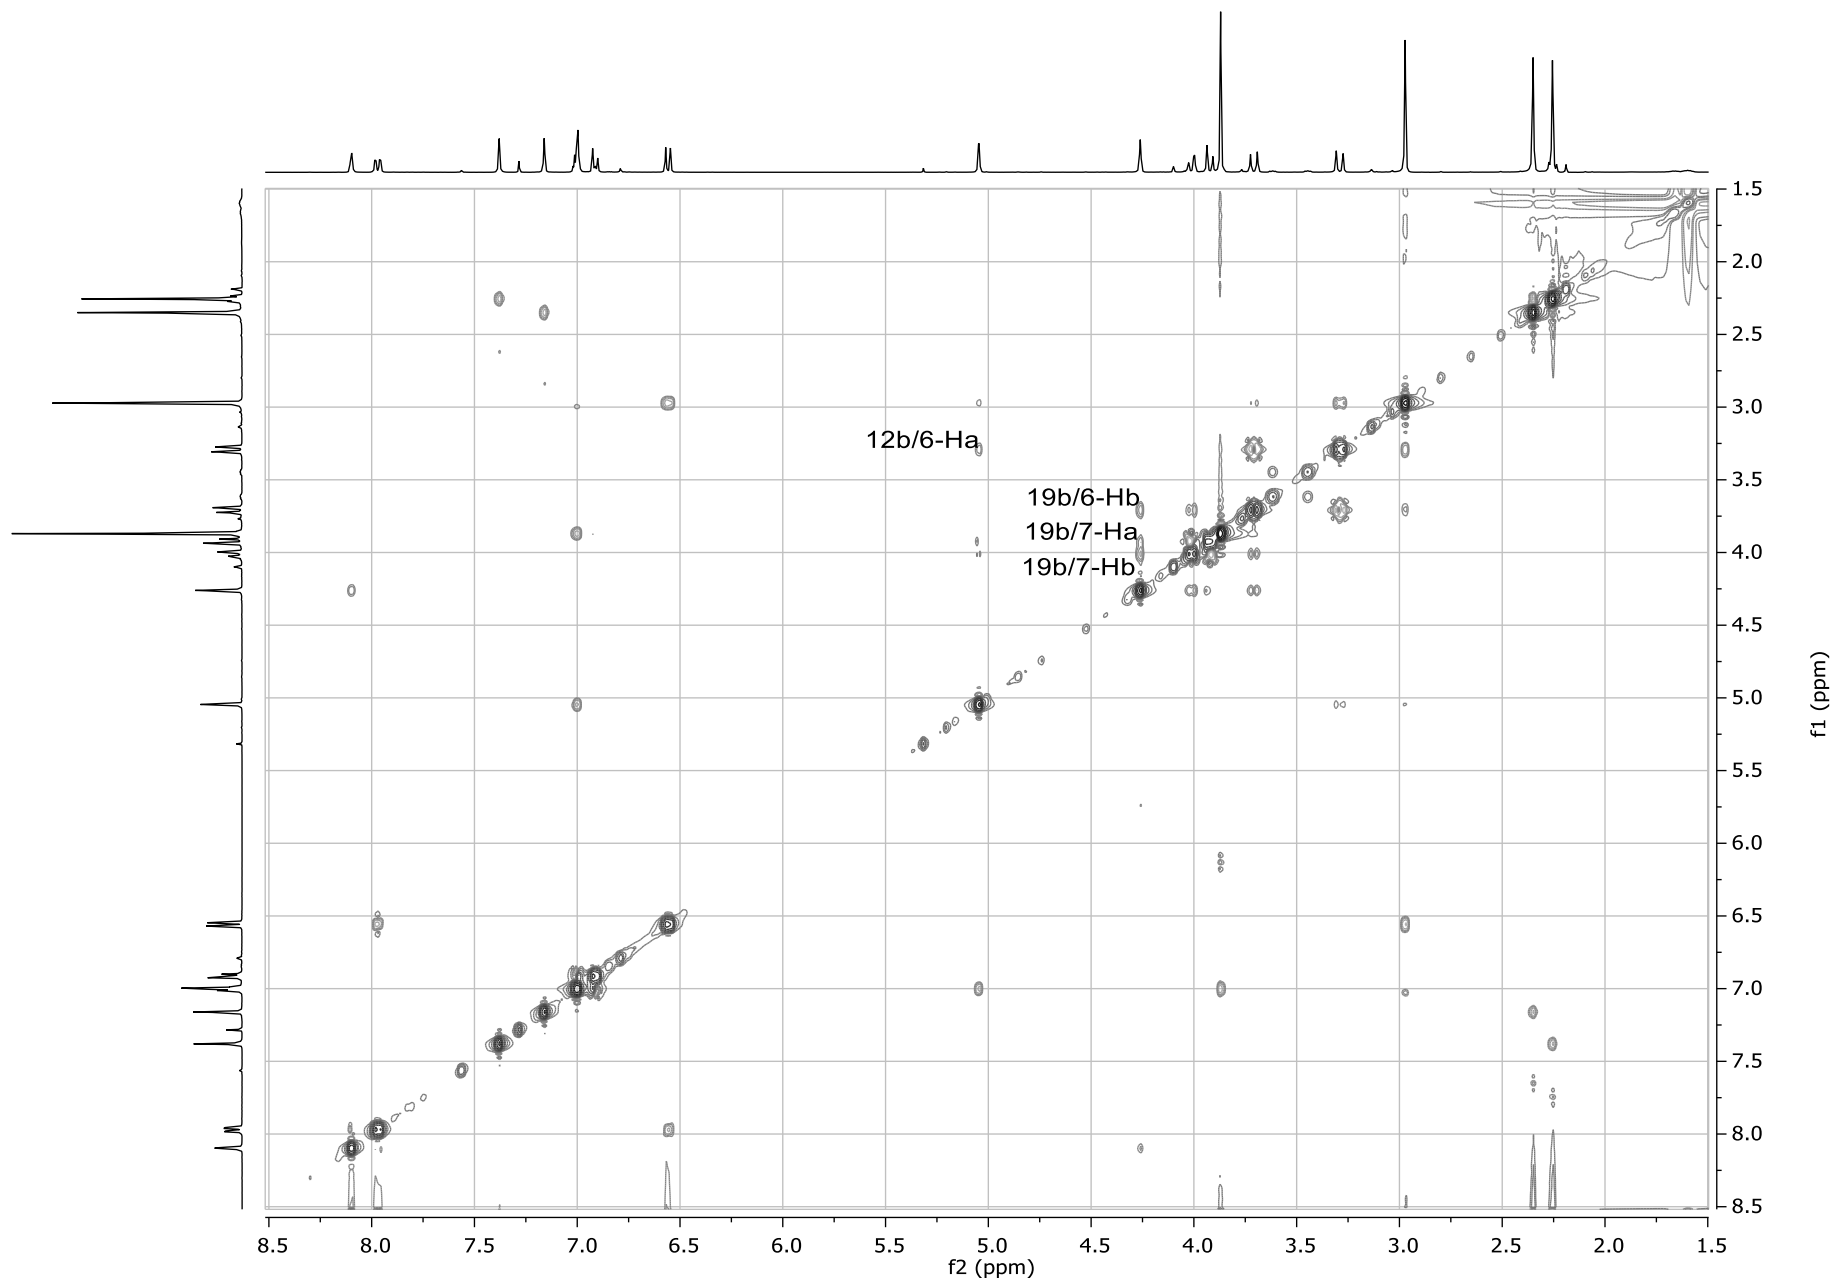

Figure S32. NOESY spectrum of *rac*-(6a*S*\*,12b*R*\*,19b*S*\*)-4ab in CDCl<sub>3</sub> at 400 MHz.

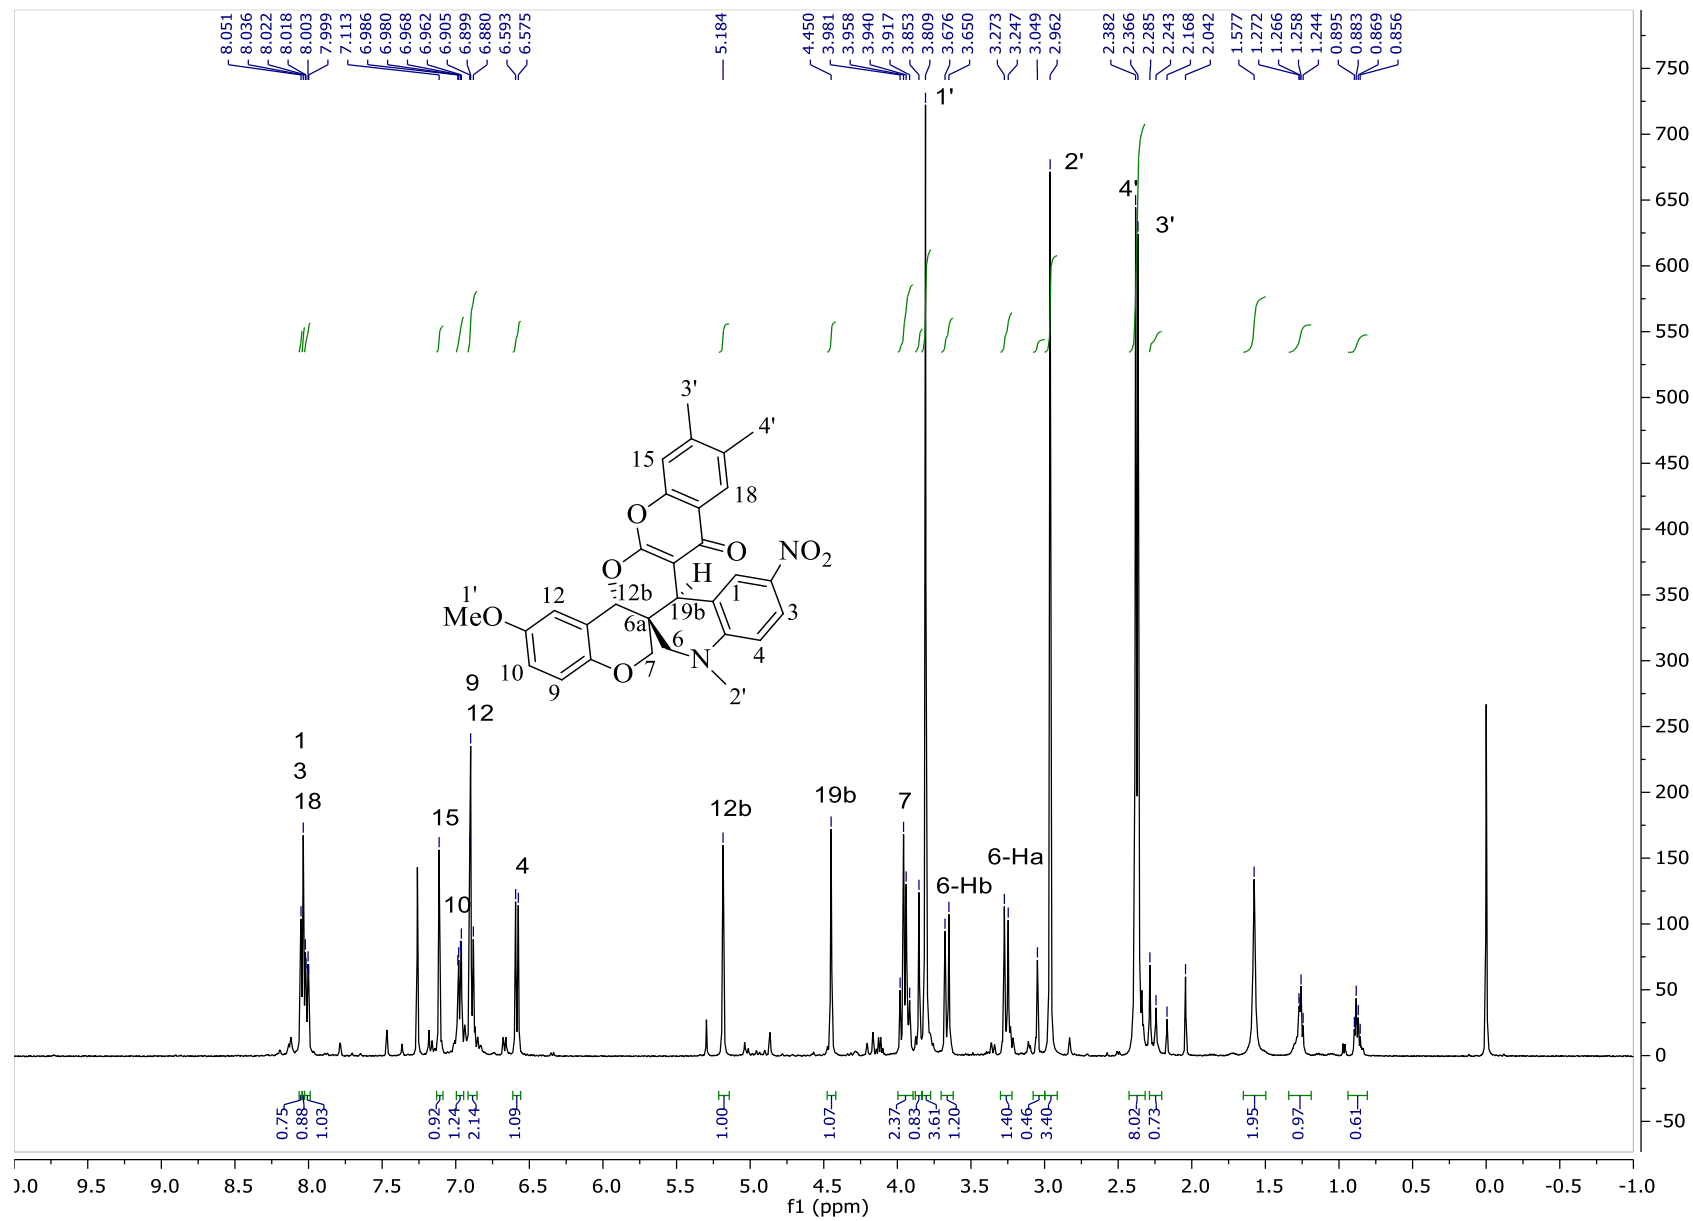

Figure S33. <sup>1</sup>H-NMR spectrum of *rac*-(6a*S*\*,12b*R*\*,19b*S*\*)-6ab in CDCl<sub>3</sub> at 500 MHz.

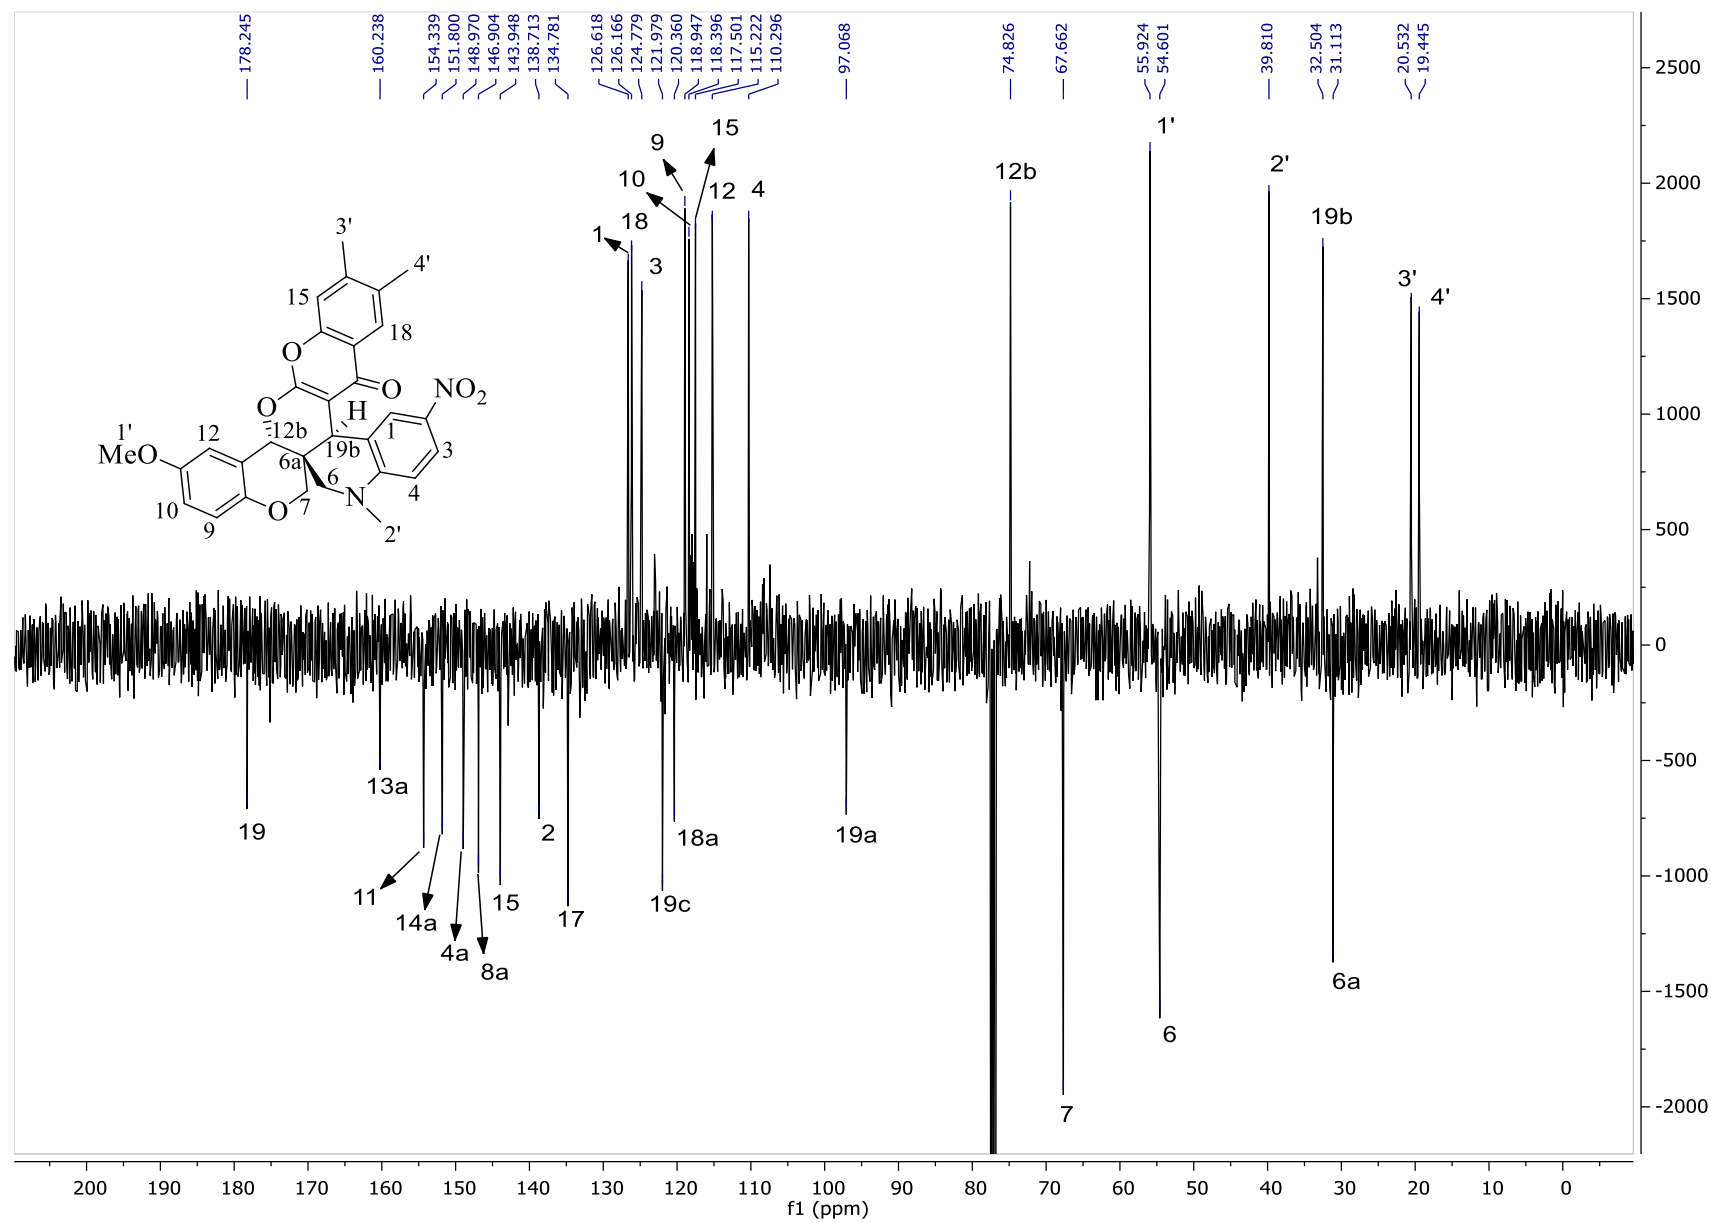

Figure S34.  $^{13}\text{C}$ -NMR spectrum of *rac*-(6a*S*\*,12b*R*\*,19b*S*\*)-6ab in  $\text{CDCl}_3$  at 100 MHz.

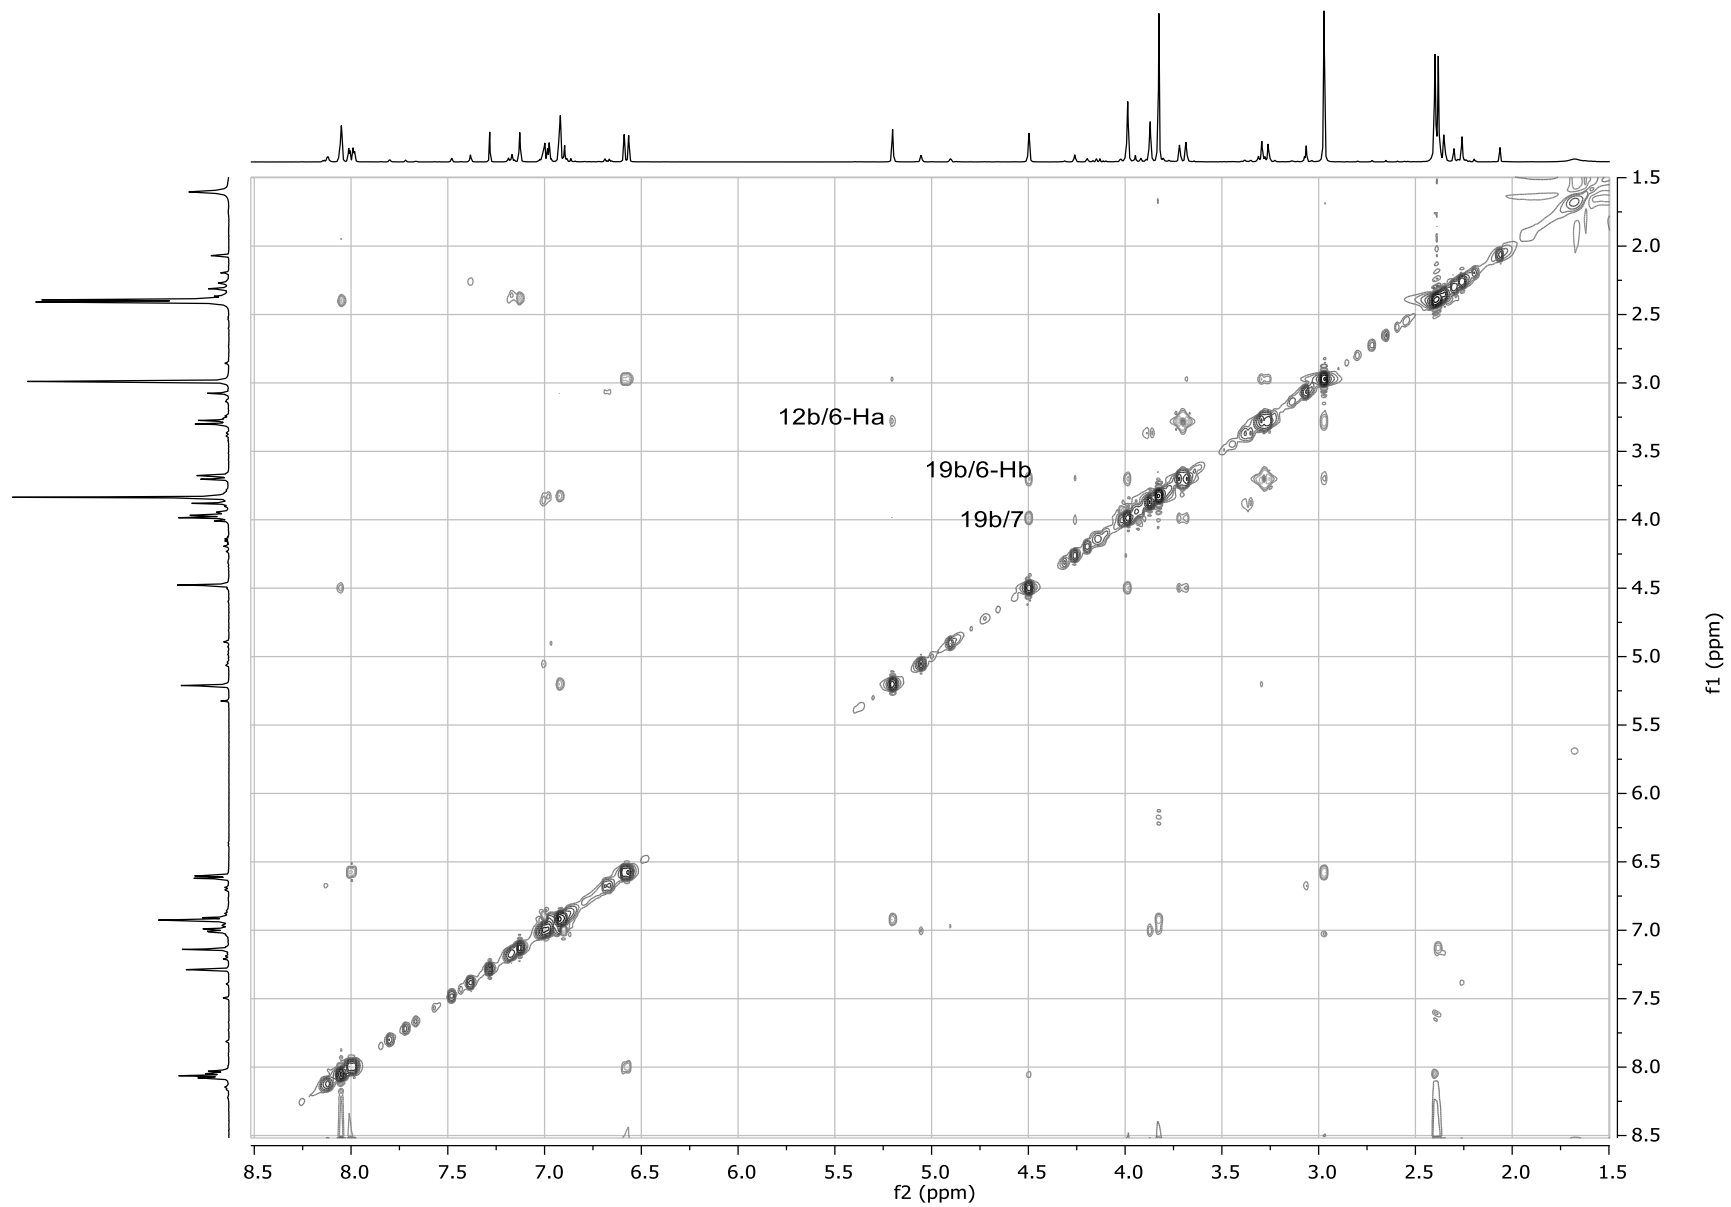

Figure S35. NOESY spectrum of *rac*-(6a*S*\*,12b*R*\*,19b*S*\*)-**6ab** in CDCl<sub>3</sub> at 400 MHz.

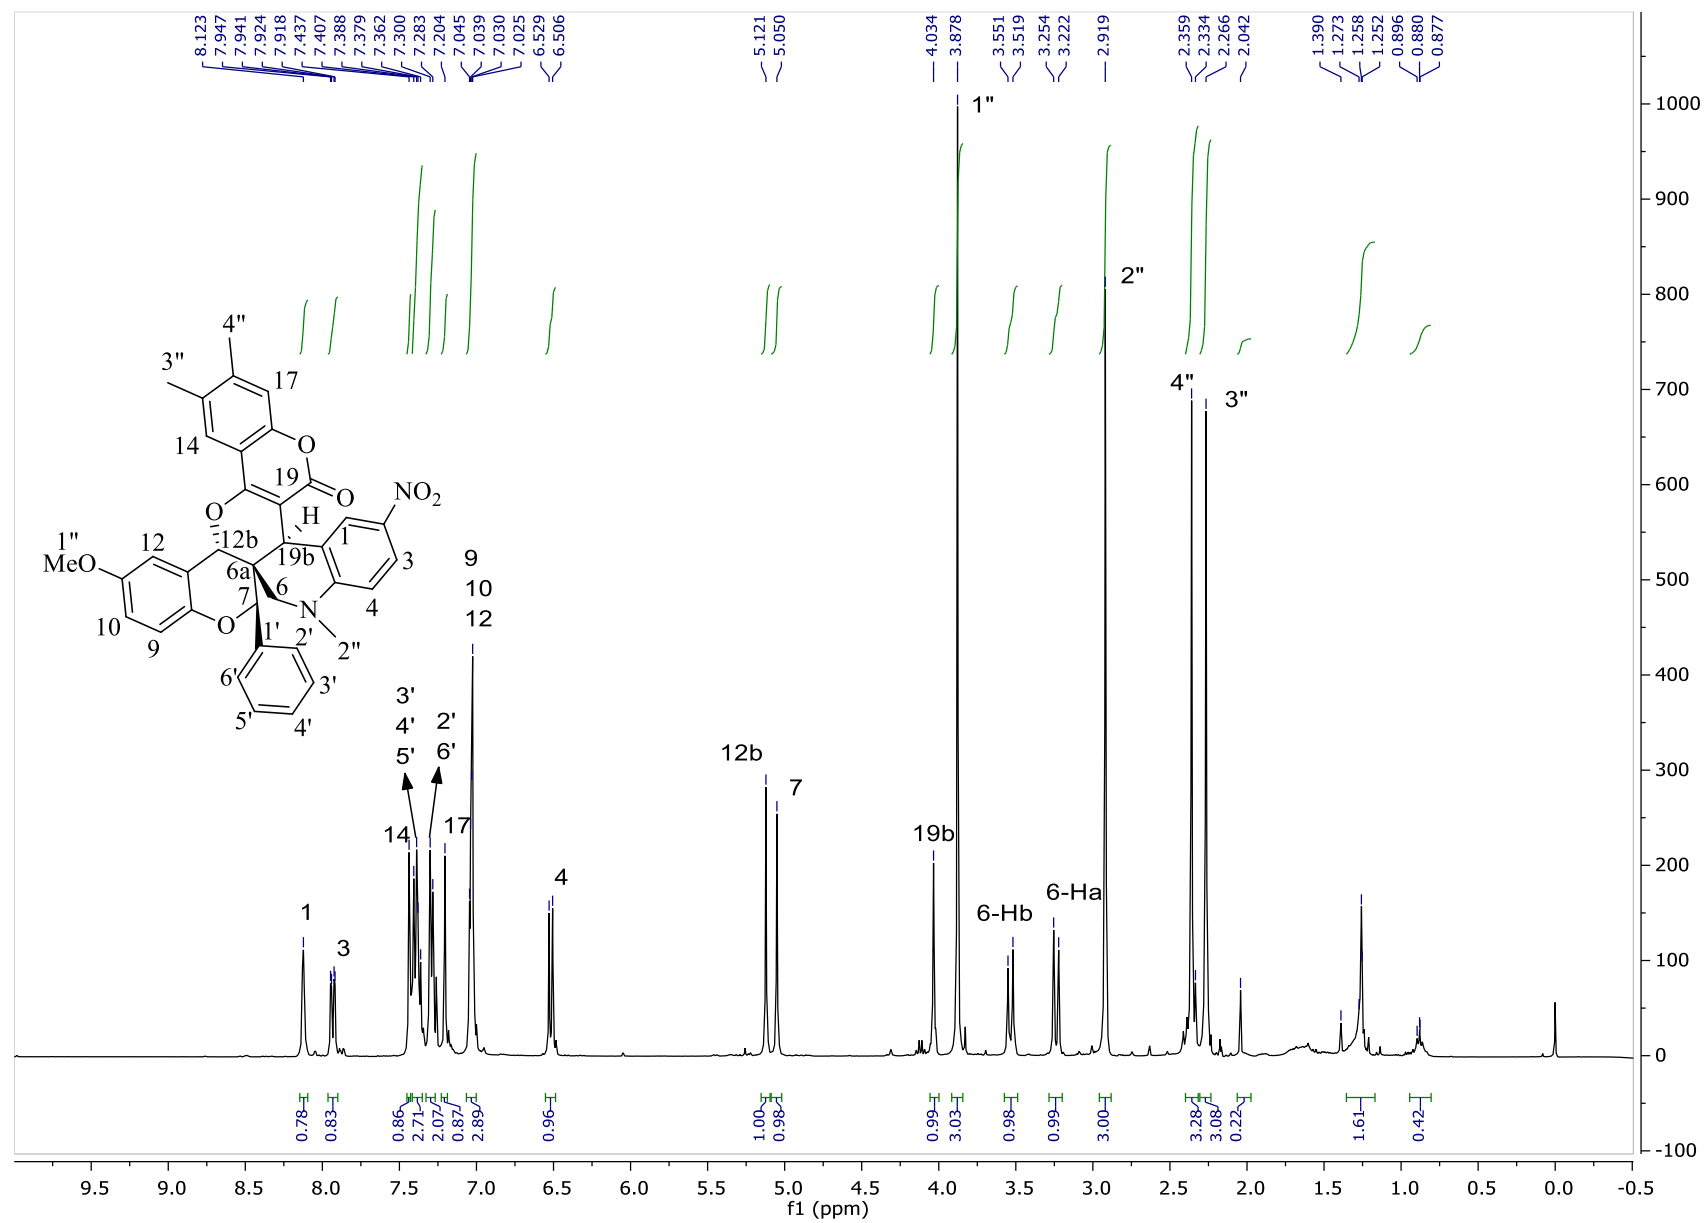

Figure S36. <sup>1</sup>H-NMR spectrum of (6aS,7R,12bR,19bS)-**4bb** in CDCl<sub>3</sub> at 400 MHz.

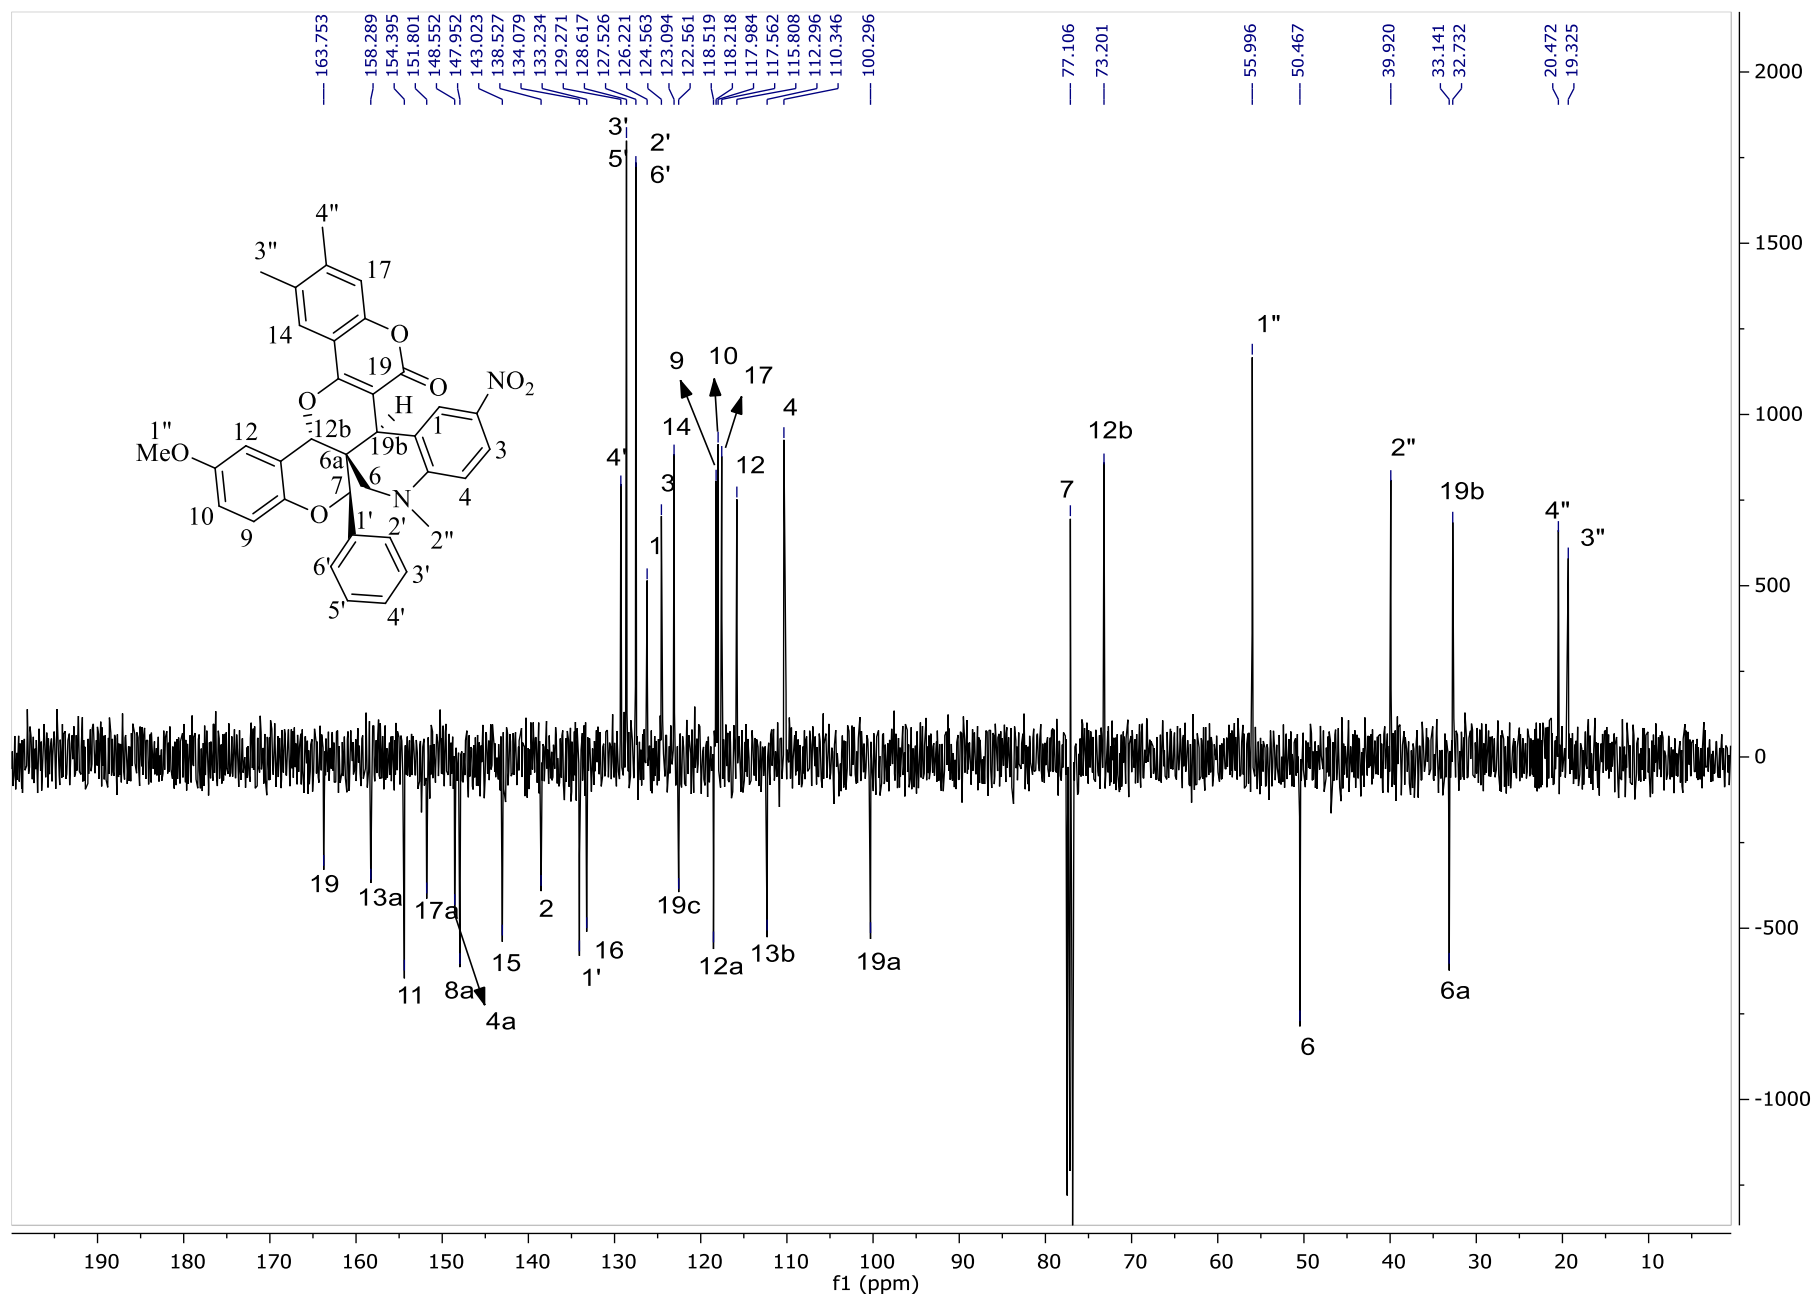

Figure S37. <sup>13</sup>C-NMR spectrum of (6aS,7R,12bR,19bS)-**4bb** in CDCl<sub>3</sub> at 100 MHz.

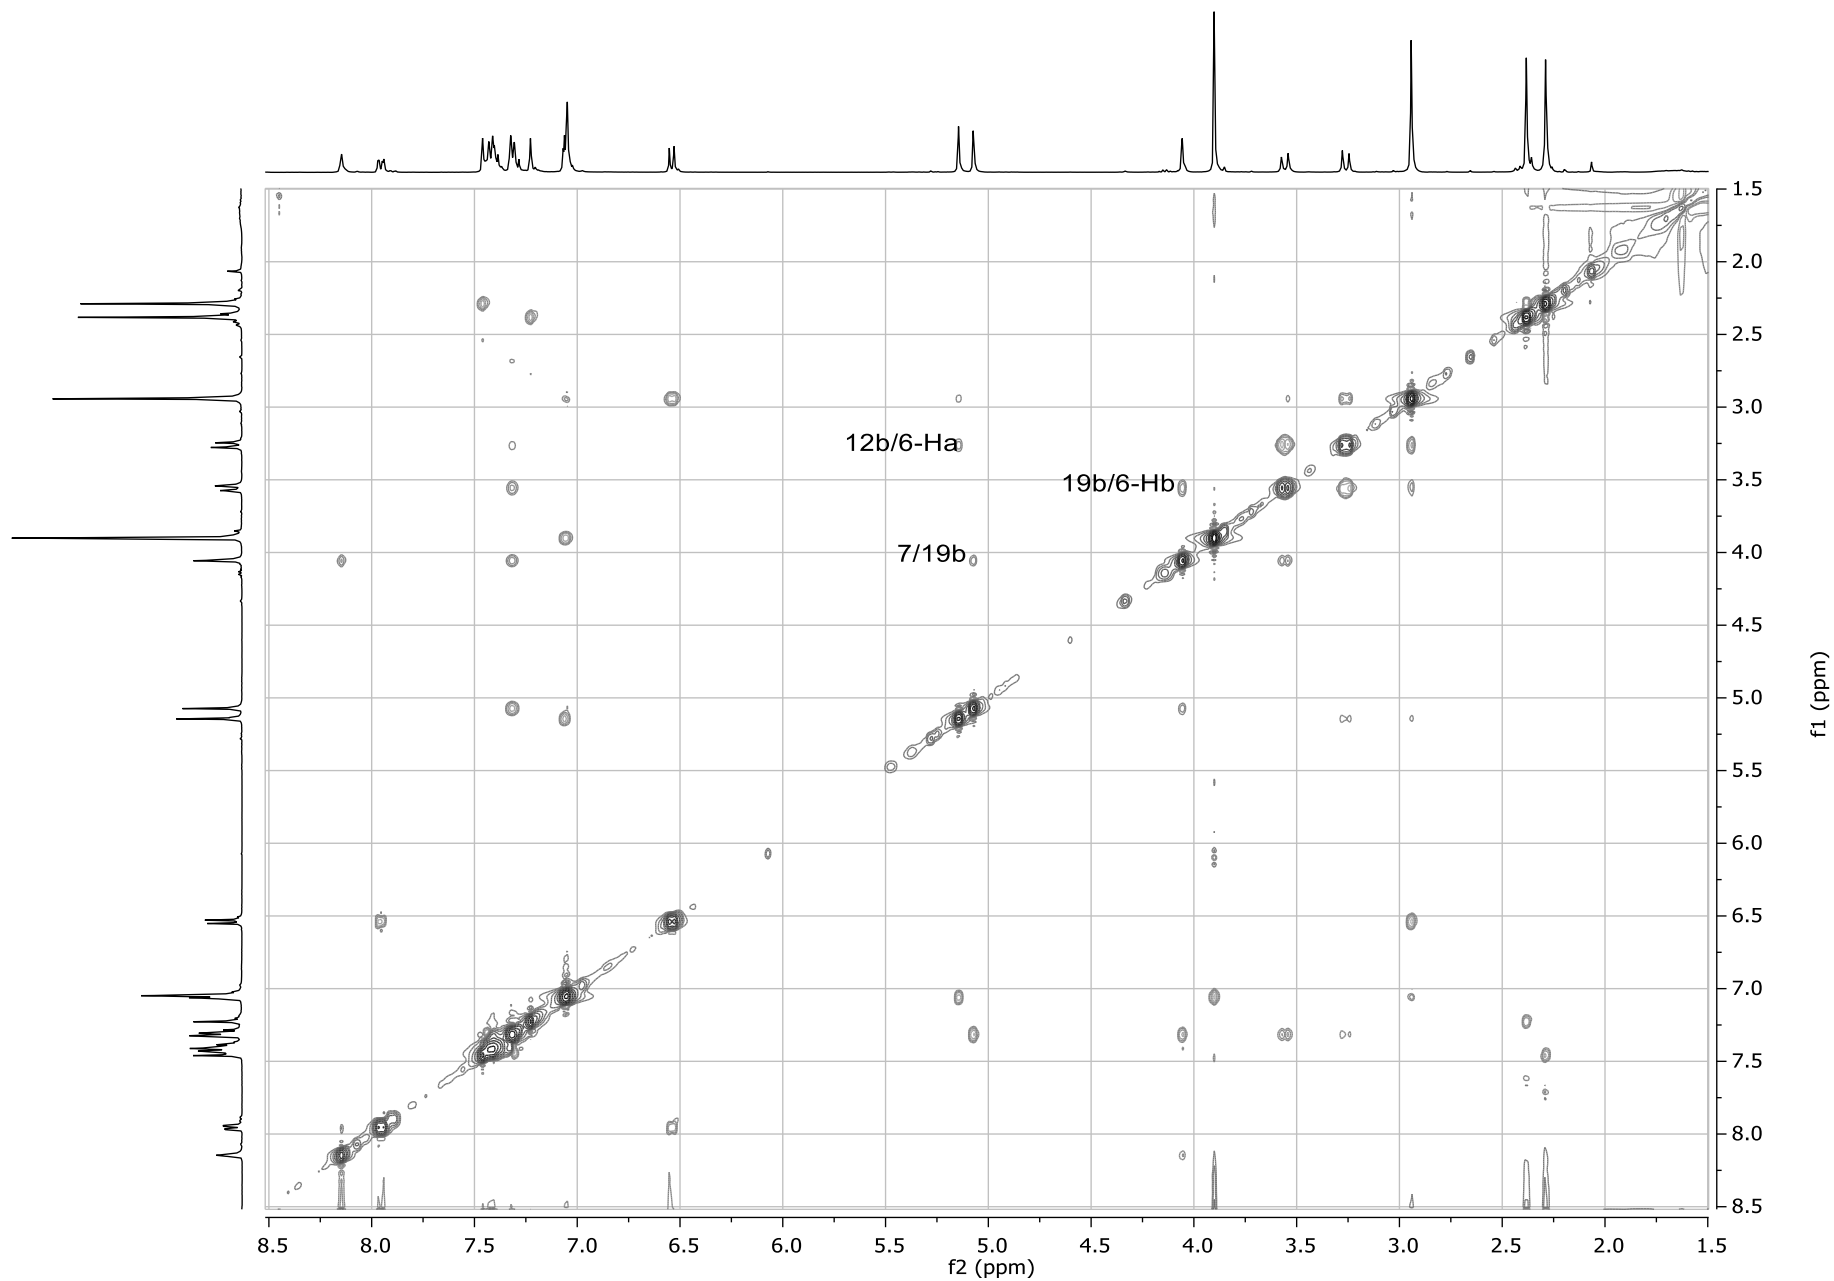

Figure S38. NOESY spectrum of (6a*S*,7*R*,12b*R*,19b*S*)-**4bb** in CDCl<sub>3</sub> at 400 MHz.

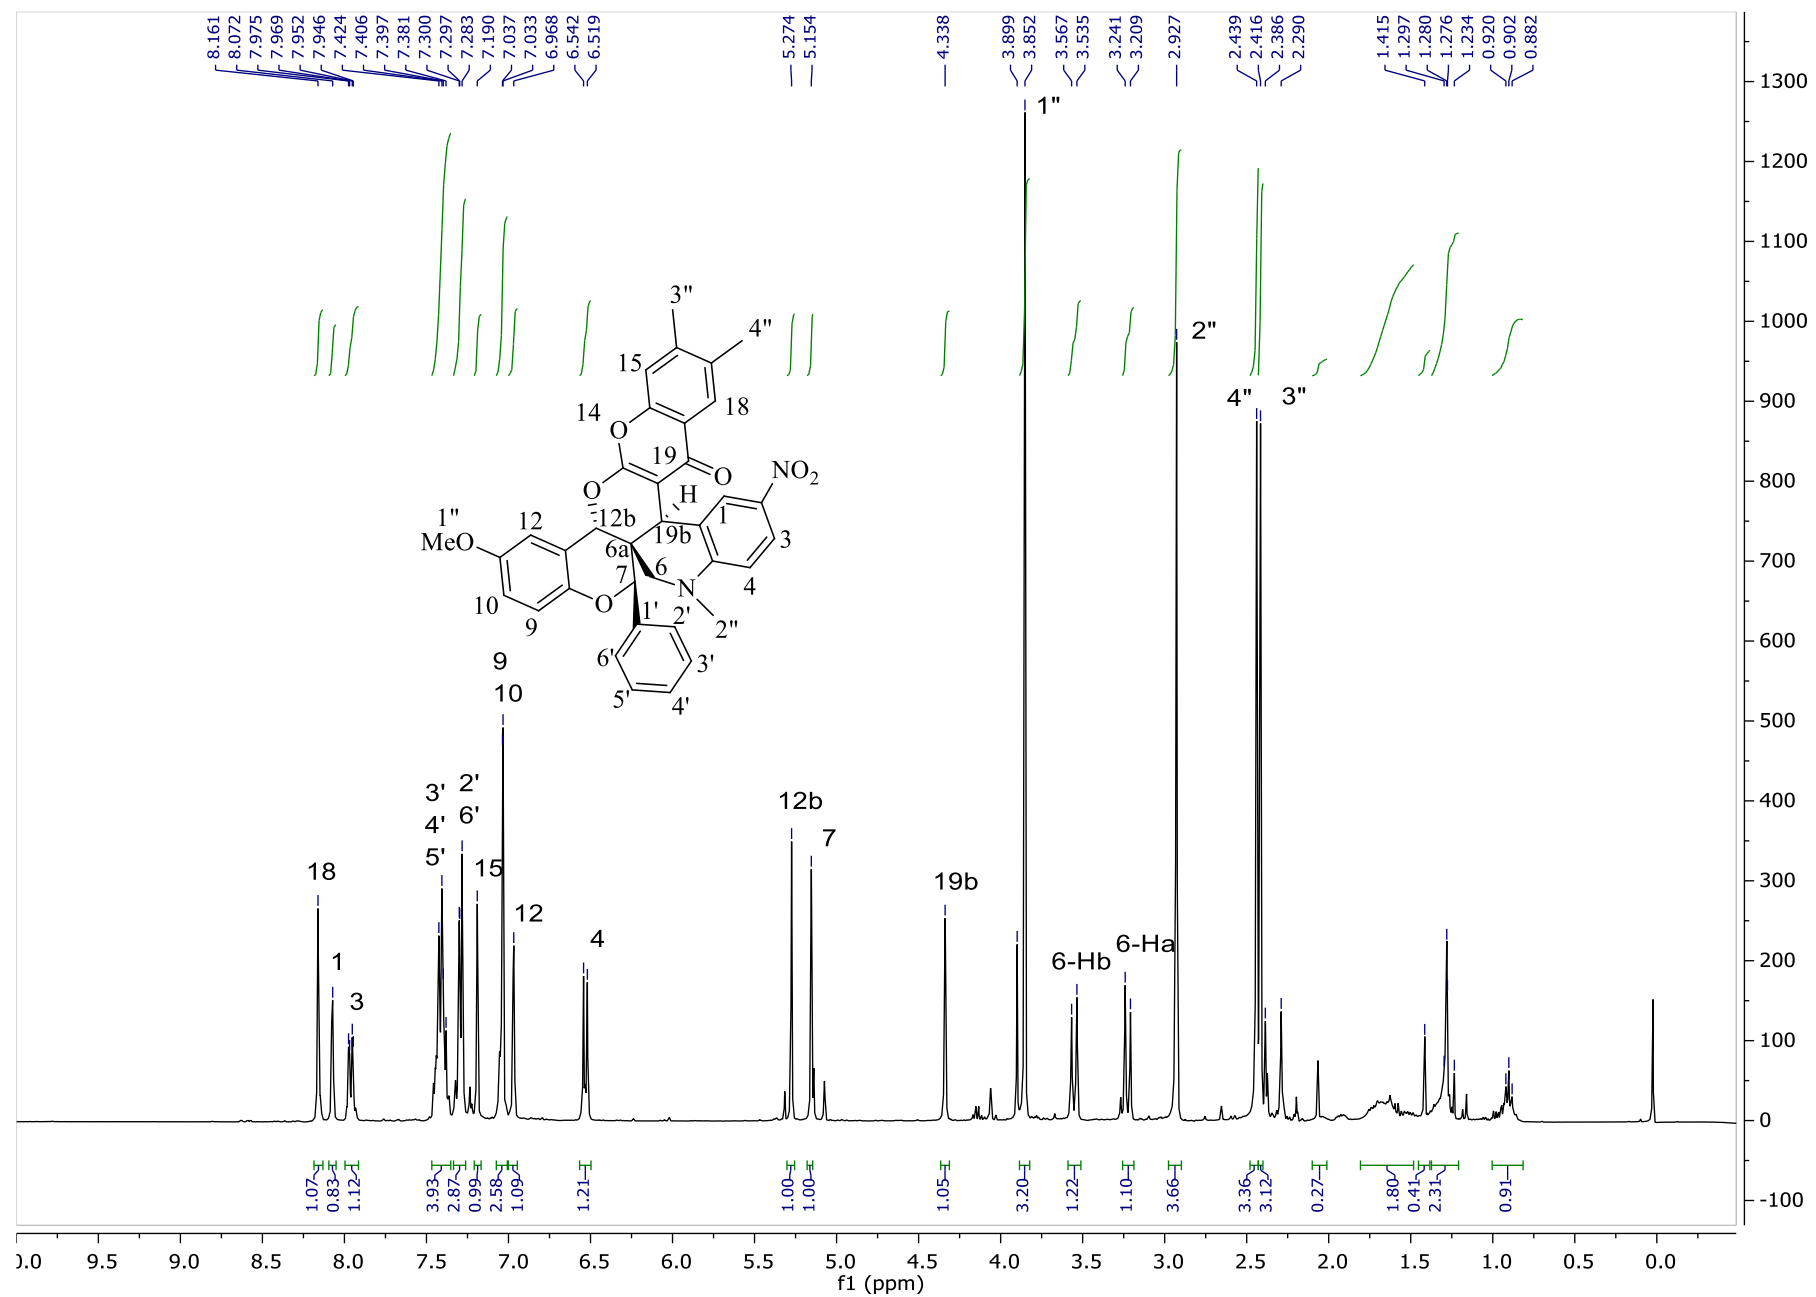

Figure S39. <sup>1</sup>H-NMR spectrum of (6aS,7R,12bR,19bS)-**6bb** in CDCl<sub>3</sub> at 400 MHz.

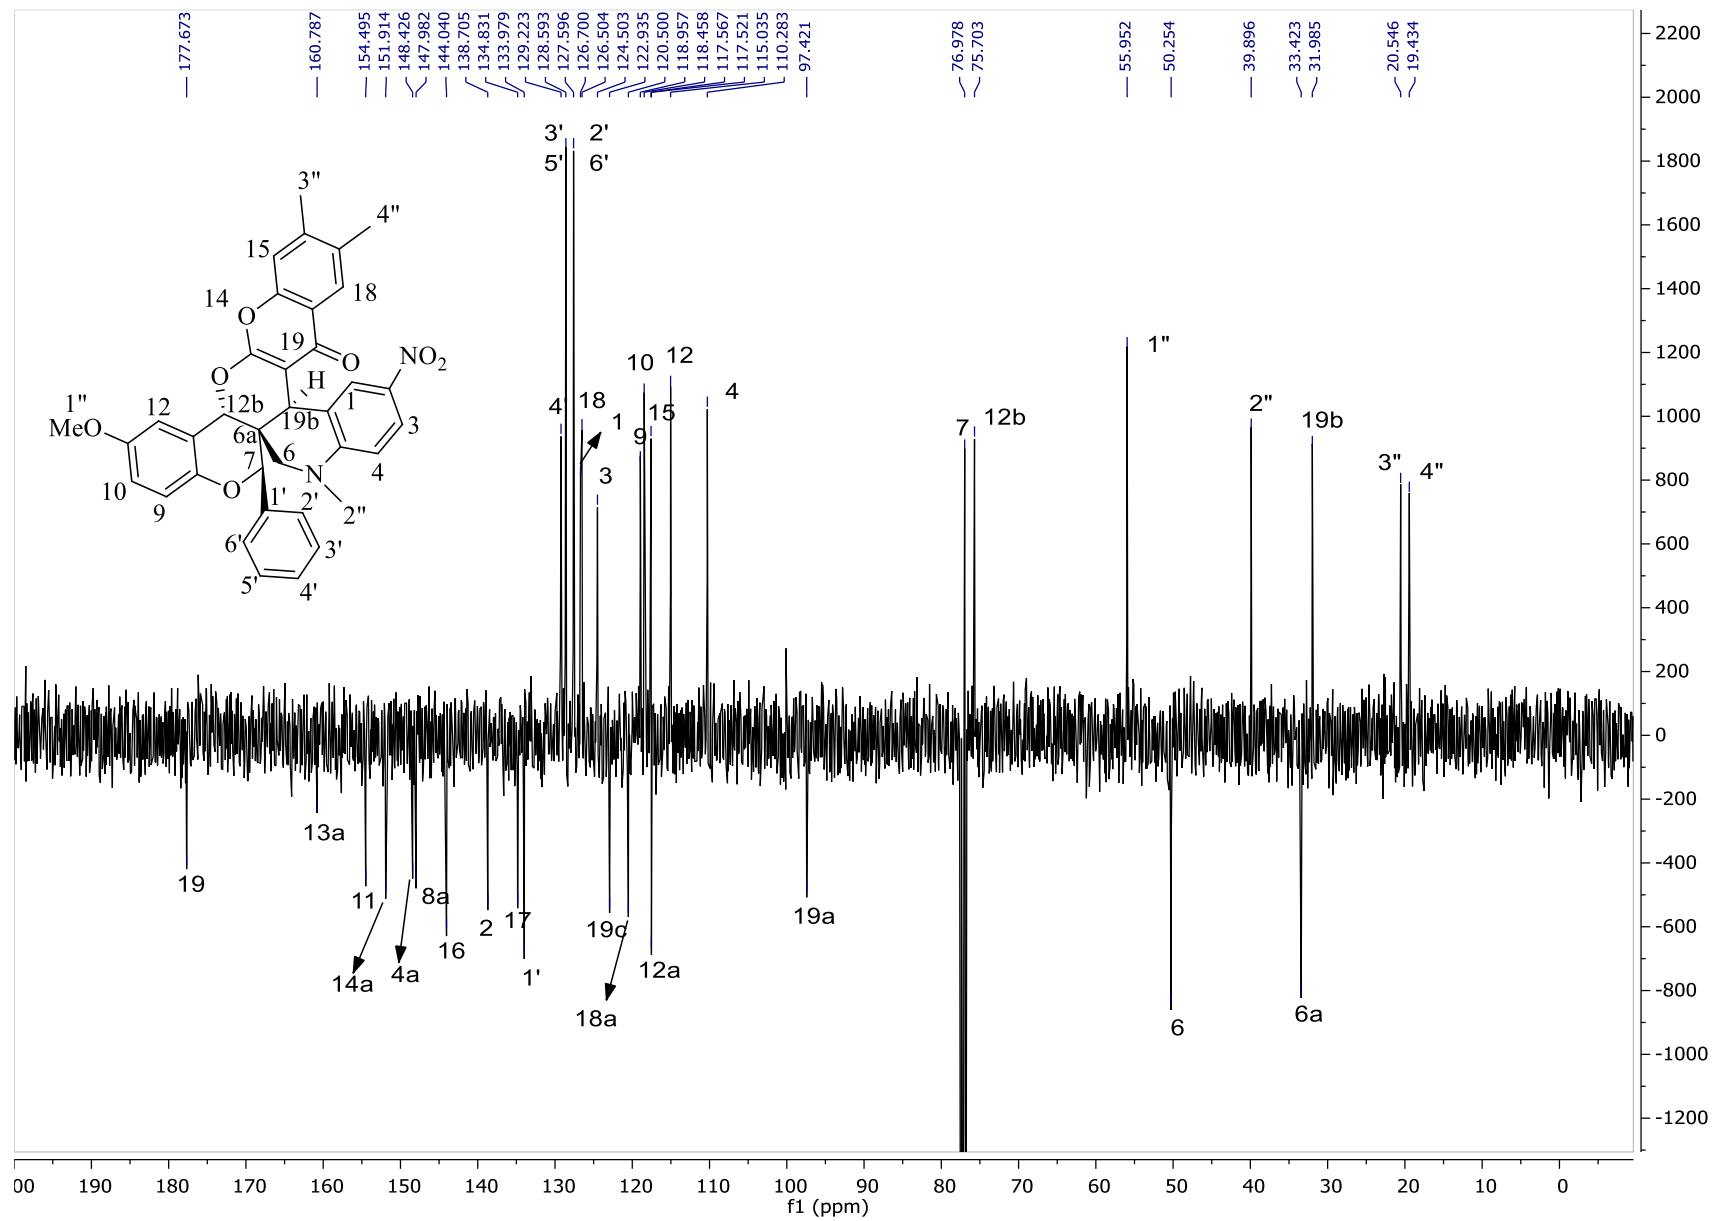

Figure S40.  $^{13}\text{C}$ -NMR spectrum of (6aS,7R,12bR,19bS)-**6bb** in  $\text{CDCl}_3$  at 100 MHz.

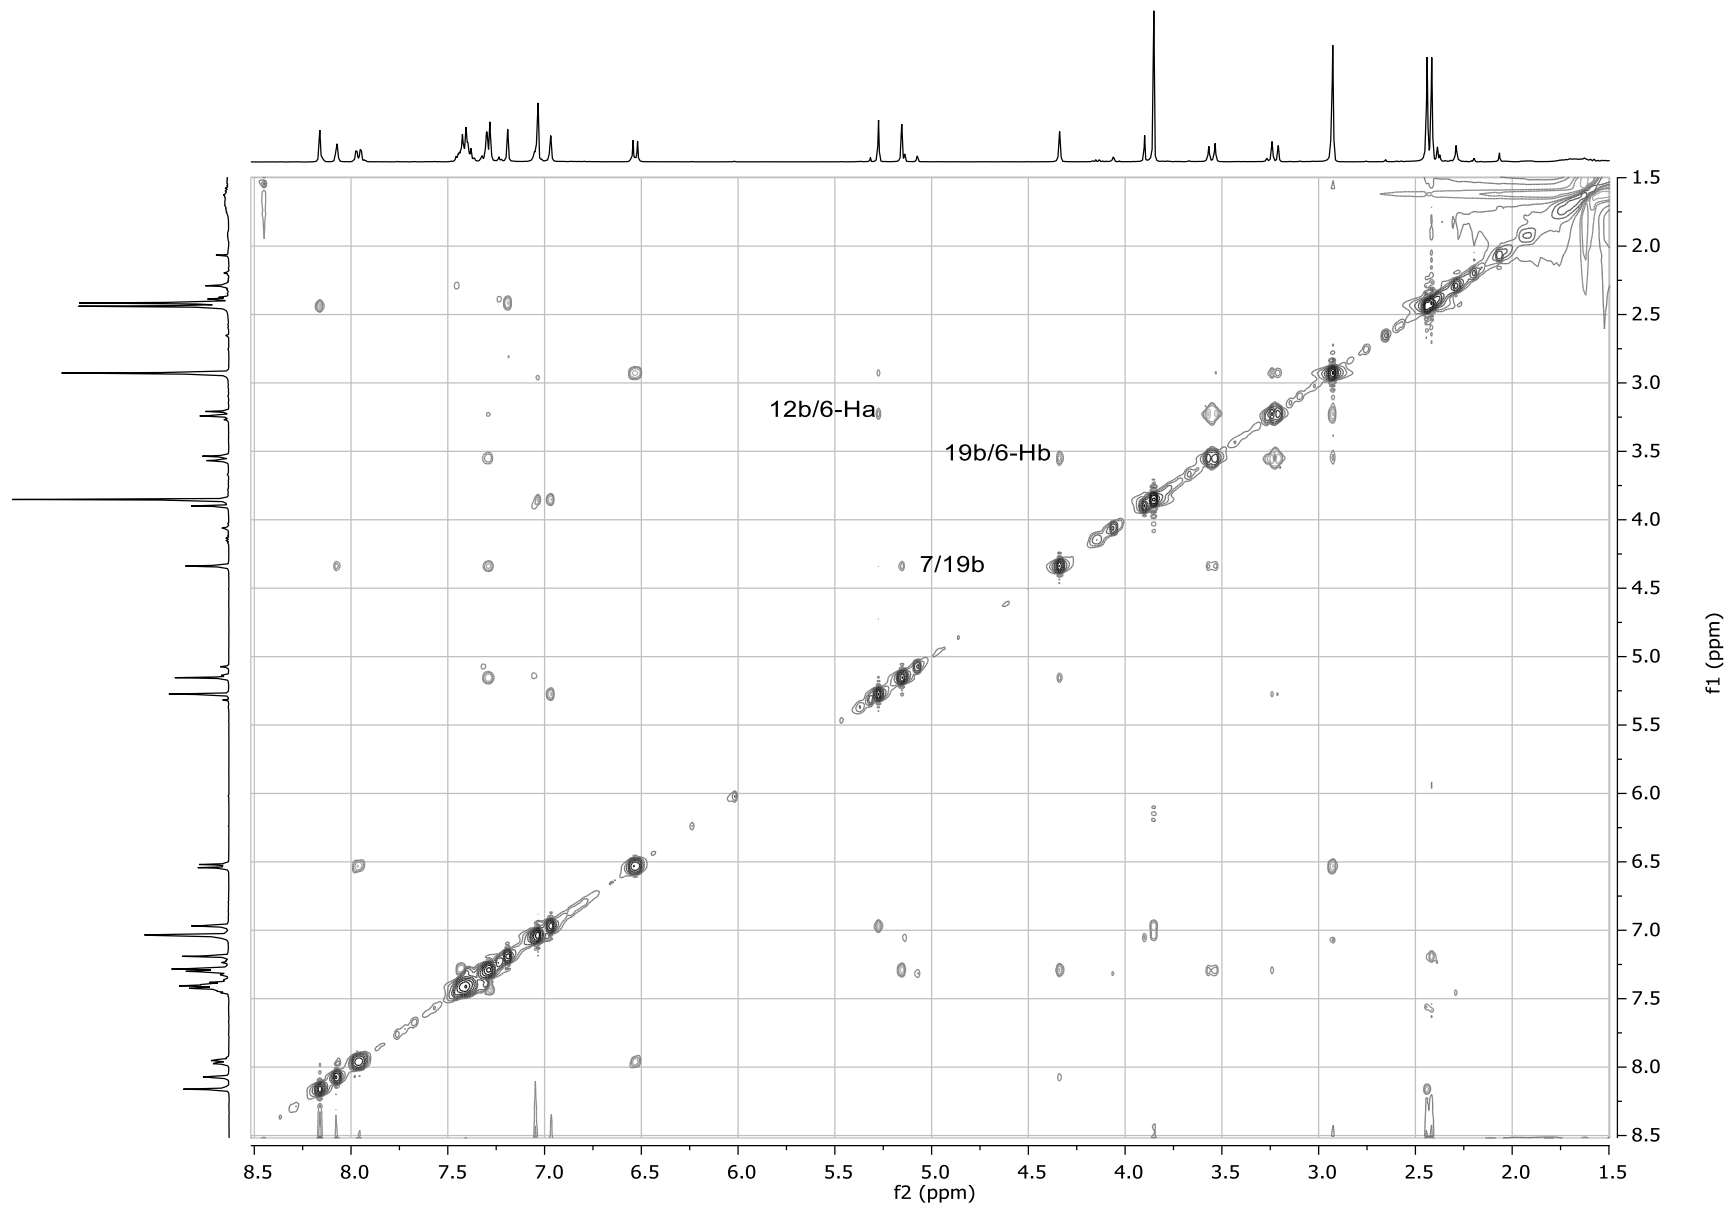

Figure S41. NOESY spectrum of (6aS,7R,12bR,19bS)-6bb in CDCl<sub>3</sub> at 400 MHz.

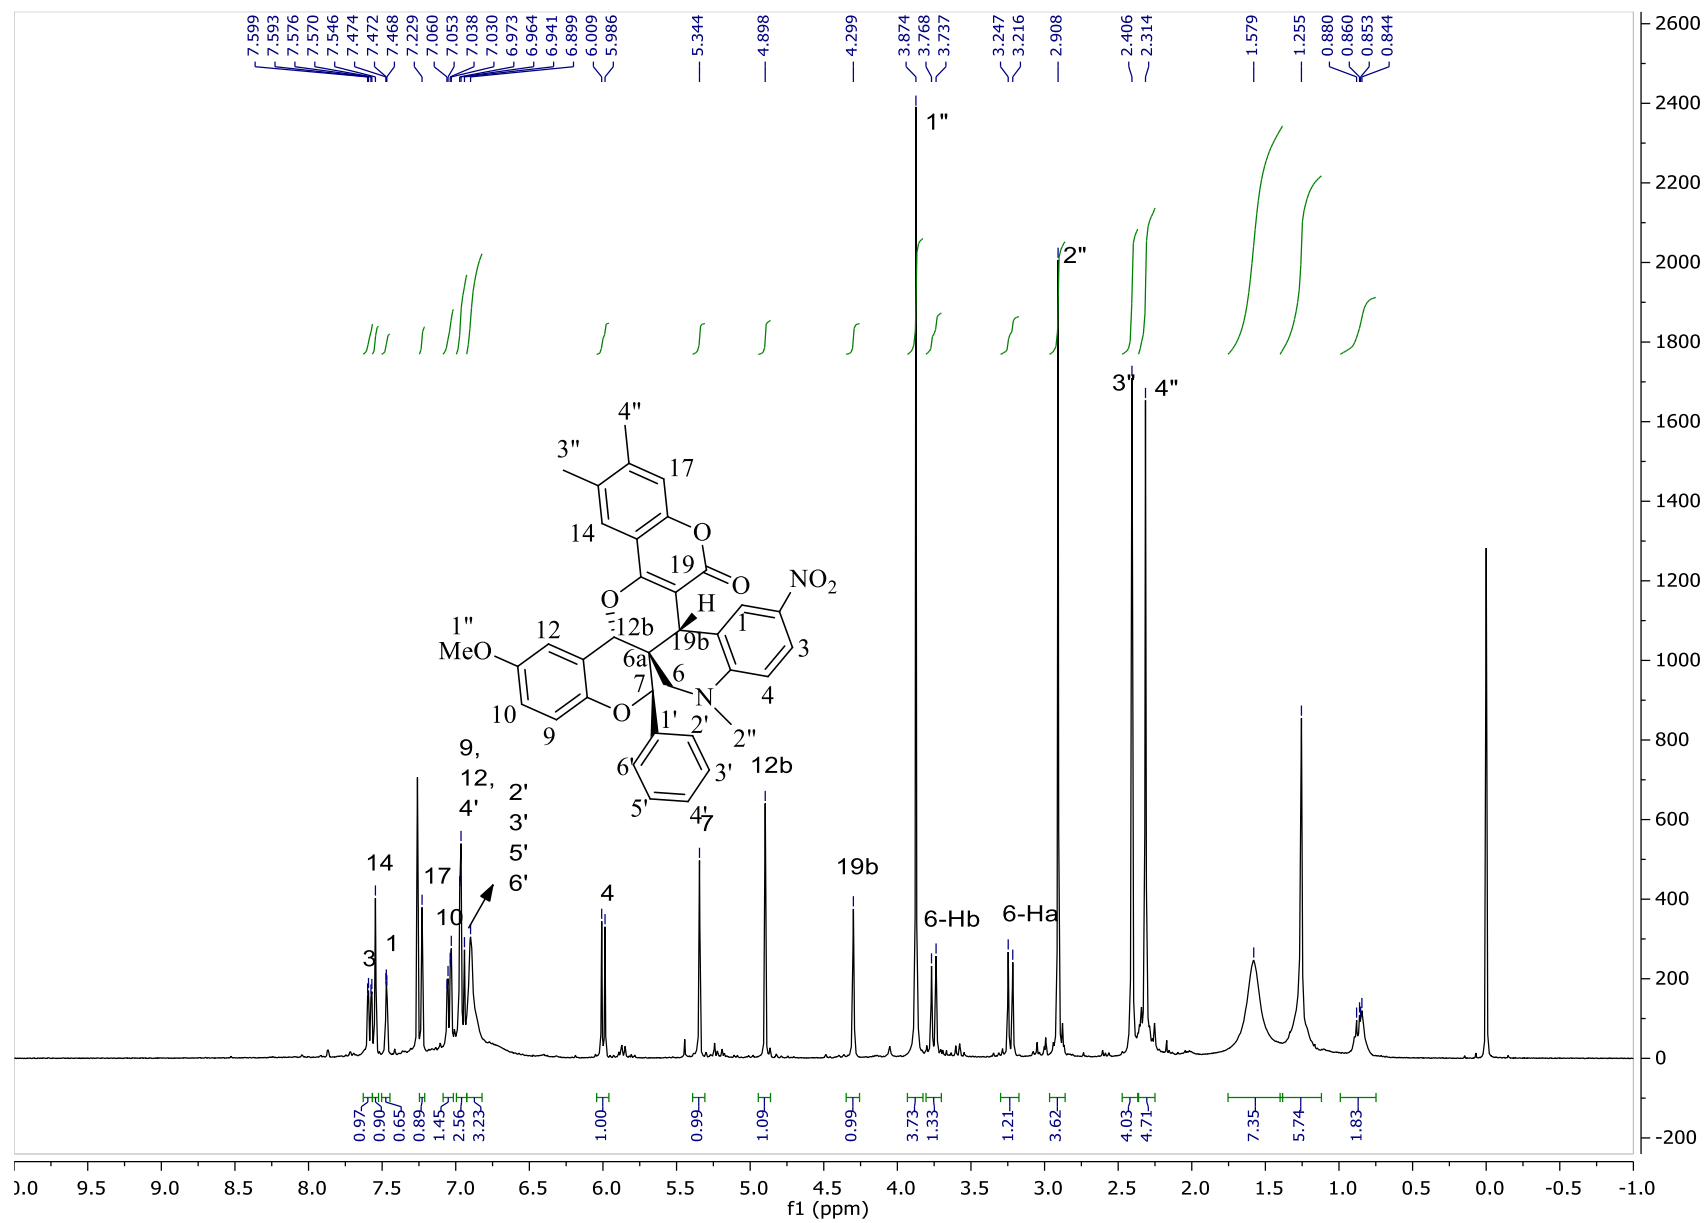

Figure S42. <sup>1</sup>H-NMR spectrum of *rac*-(6a*S*\*,7*R*\*,12b*R*\*,19b*R*\*)-5bb in CDCl<sub>3</sub> at 400 MHz.

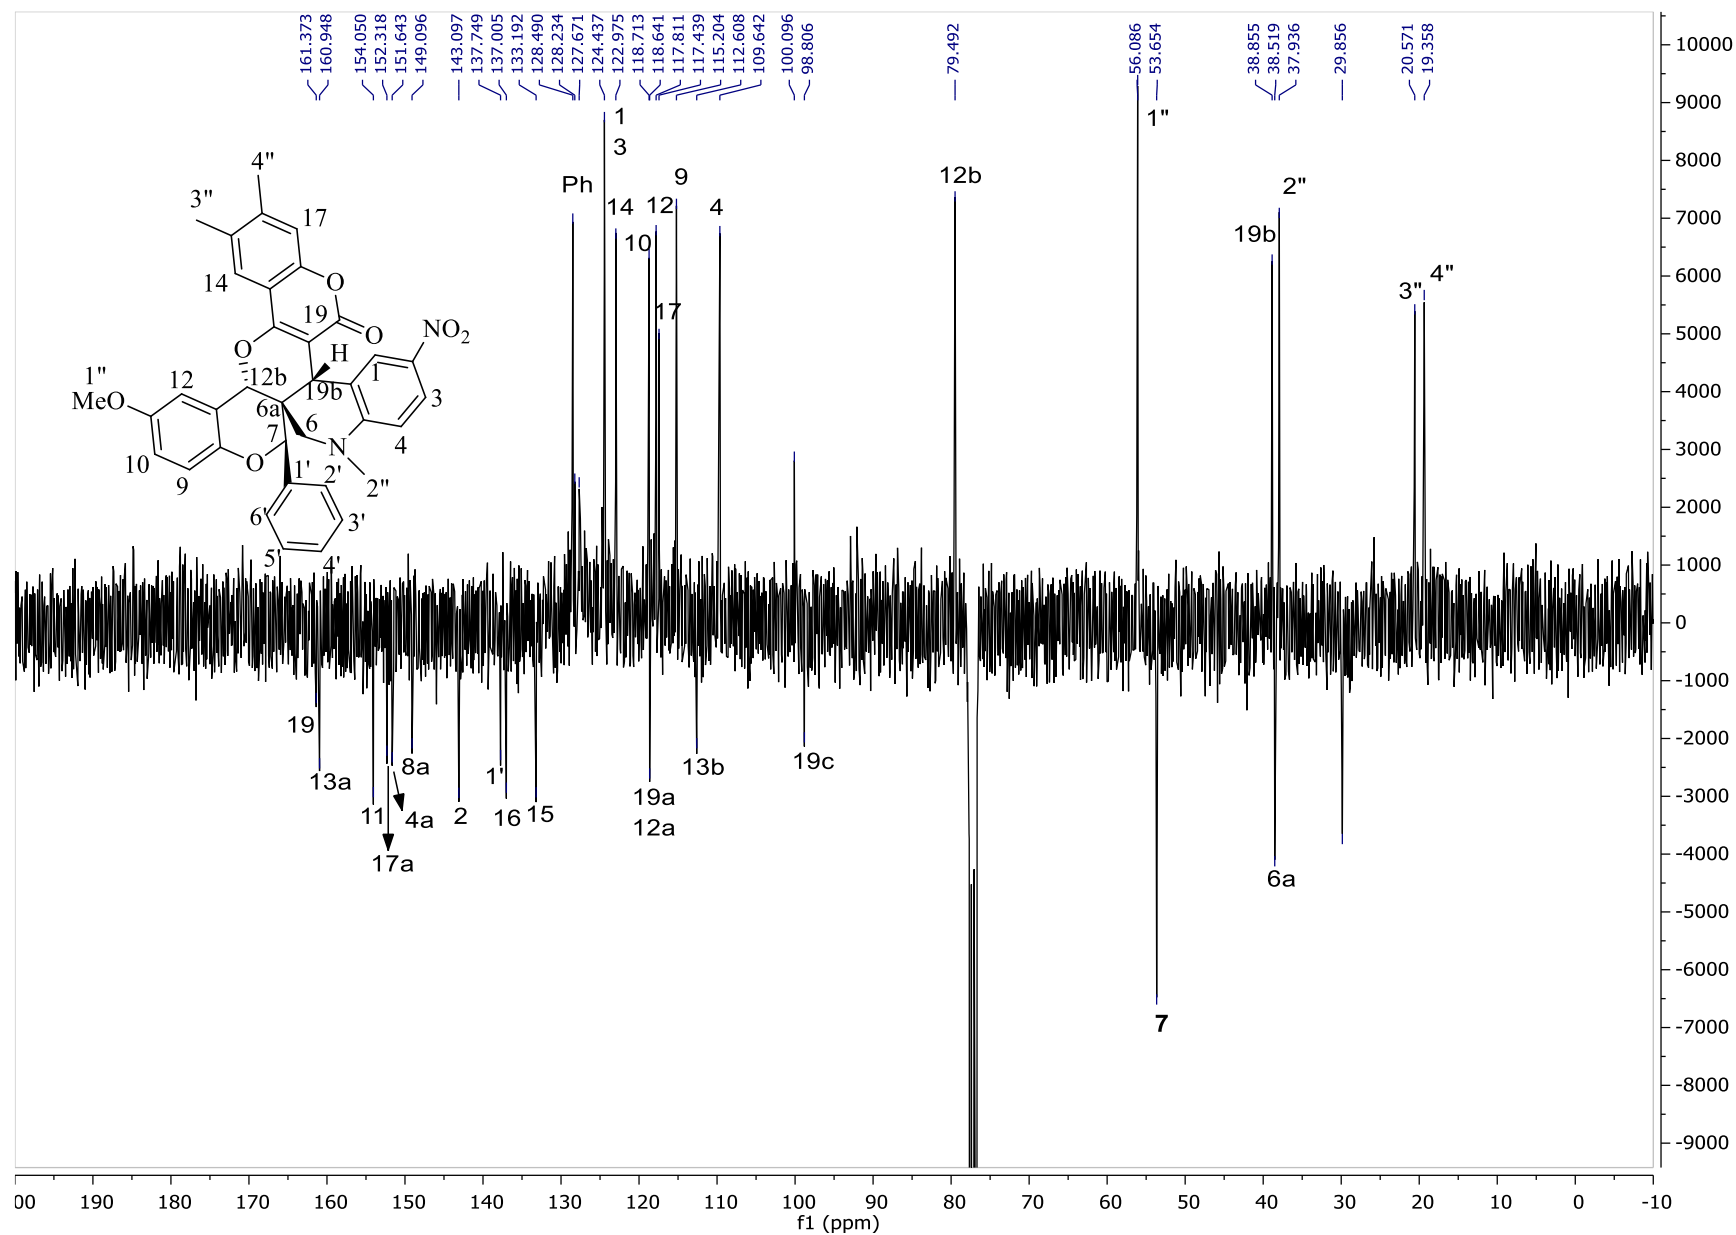

Figure S43. <sup>13</sup>C-NMR spectrum of *rac*-(6a*S*\*,7*R*\*,12b*R*\*,19b*R*\*)-**5bb** in CDCl<sub>3</sub> at 100 MHz.

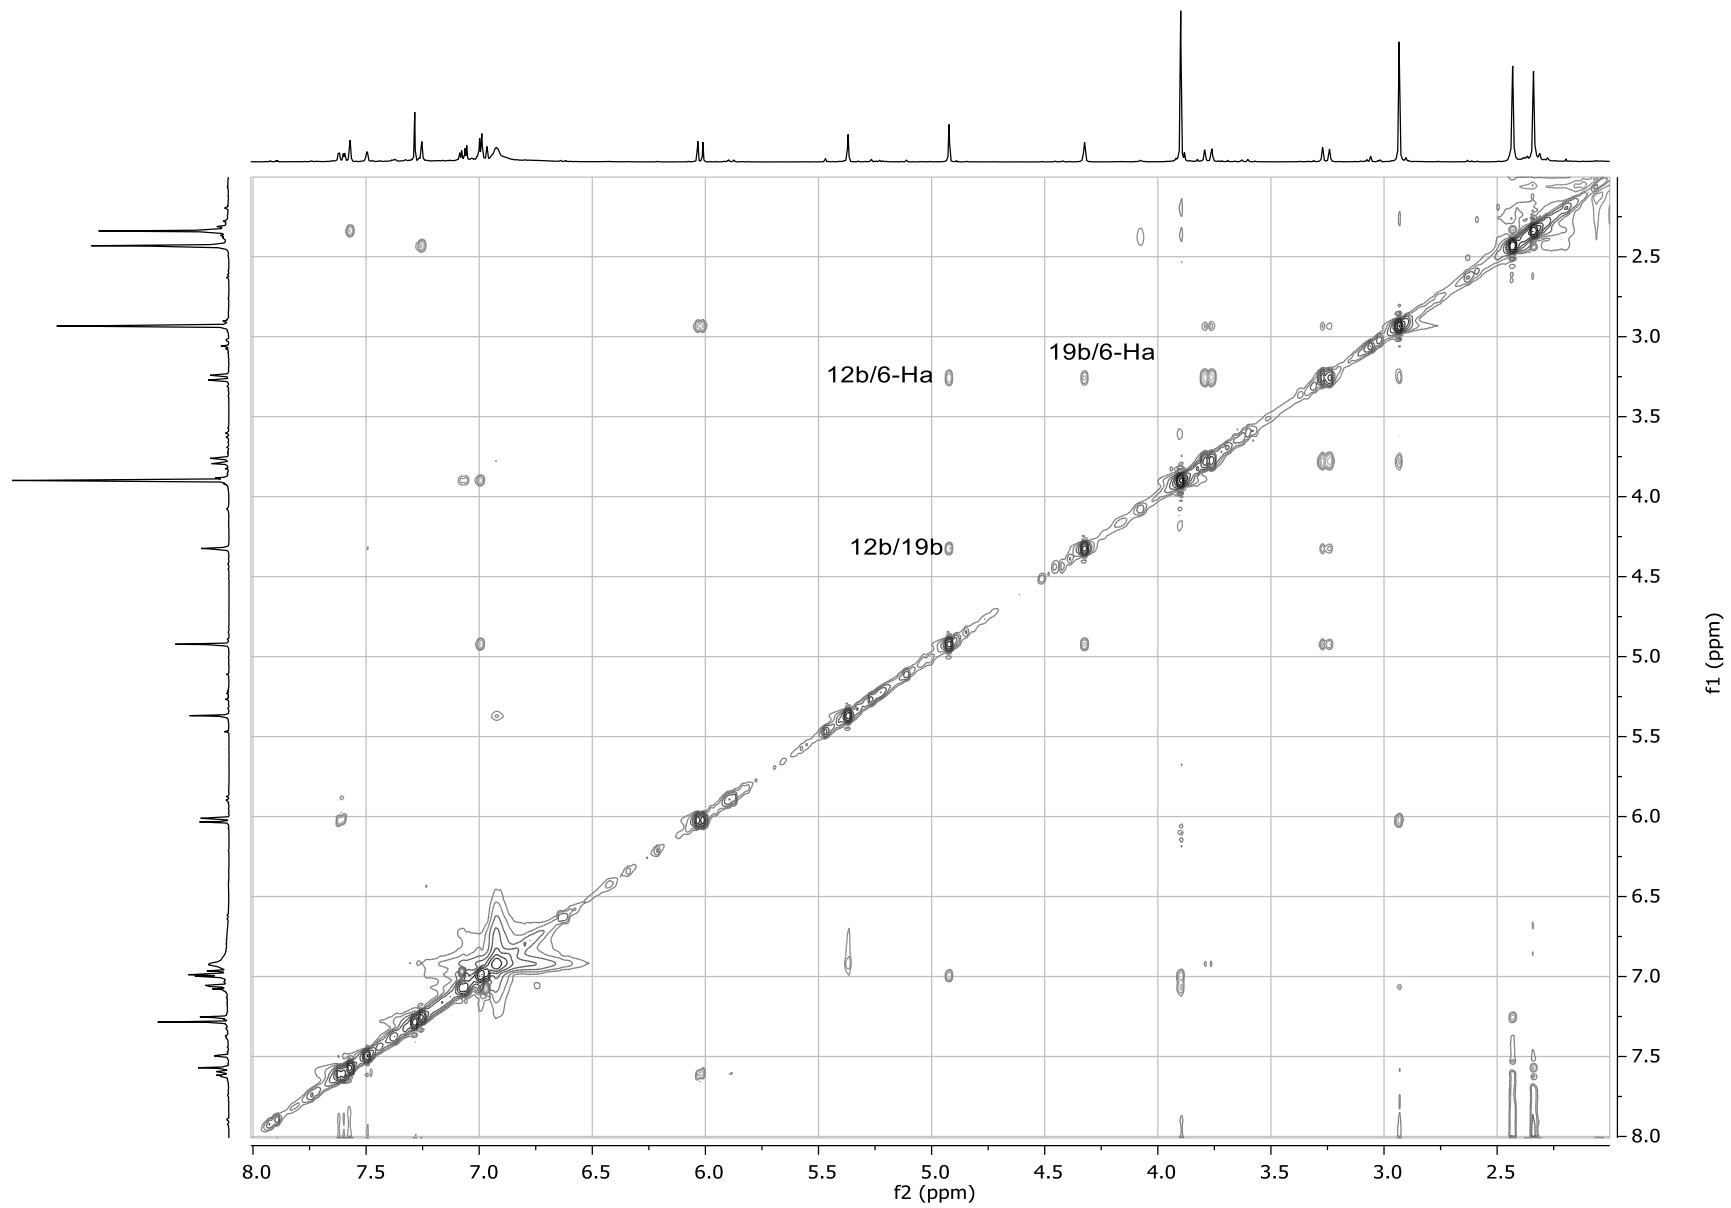

Figure S44. NOESY spectrum of *rac*-(6a*S*\*,7*R*\*,12b*R*\*,19b*R*\*)-**5bb** in CDCl<sub>3</sub> at 400 MHz.

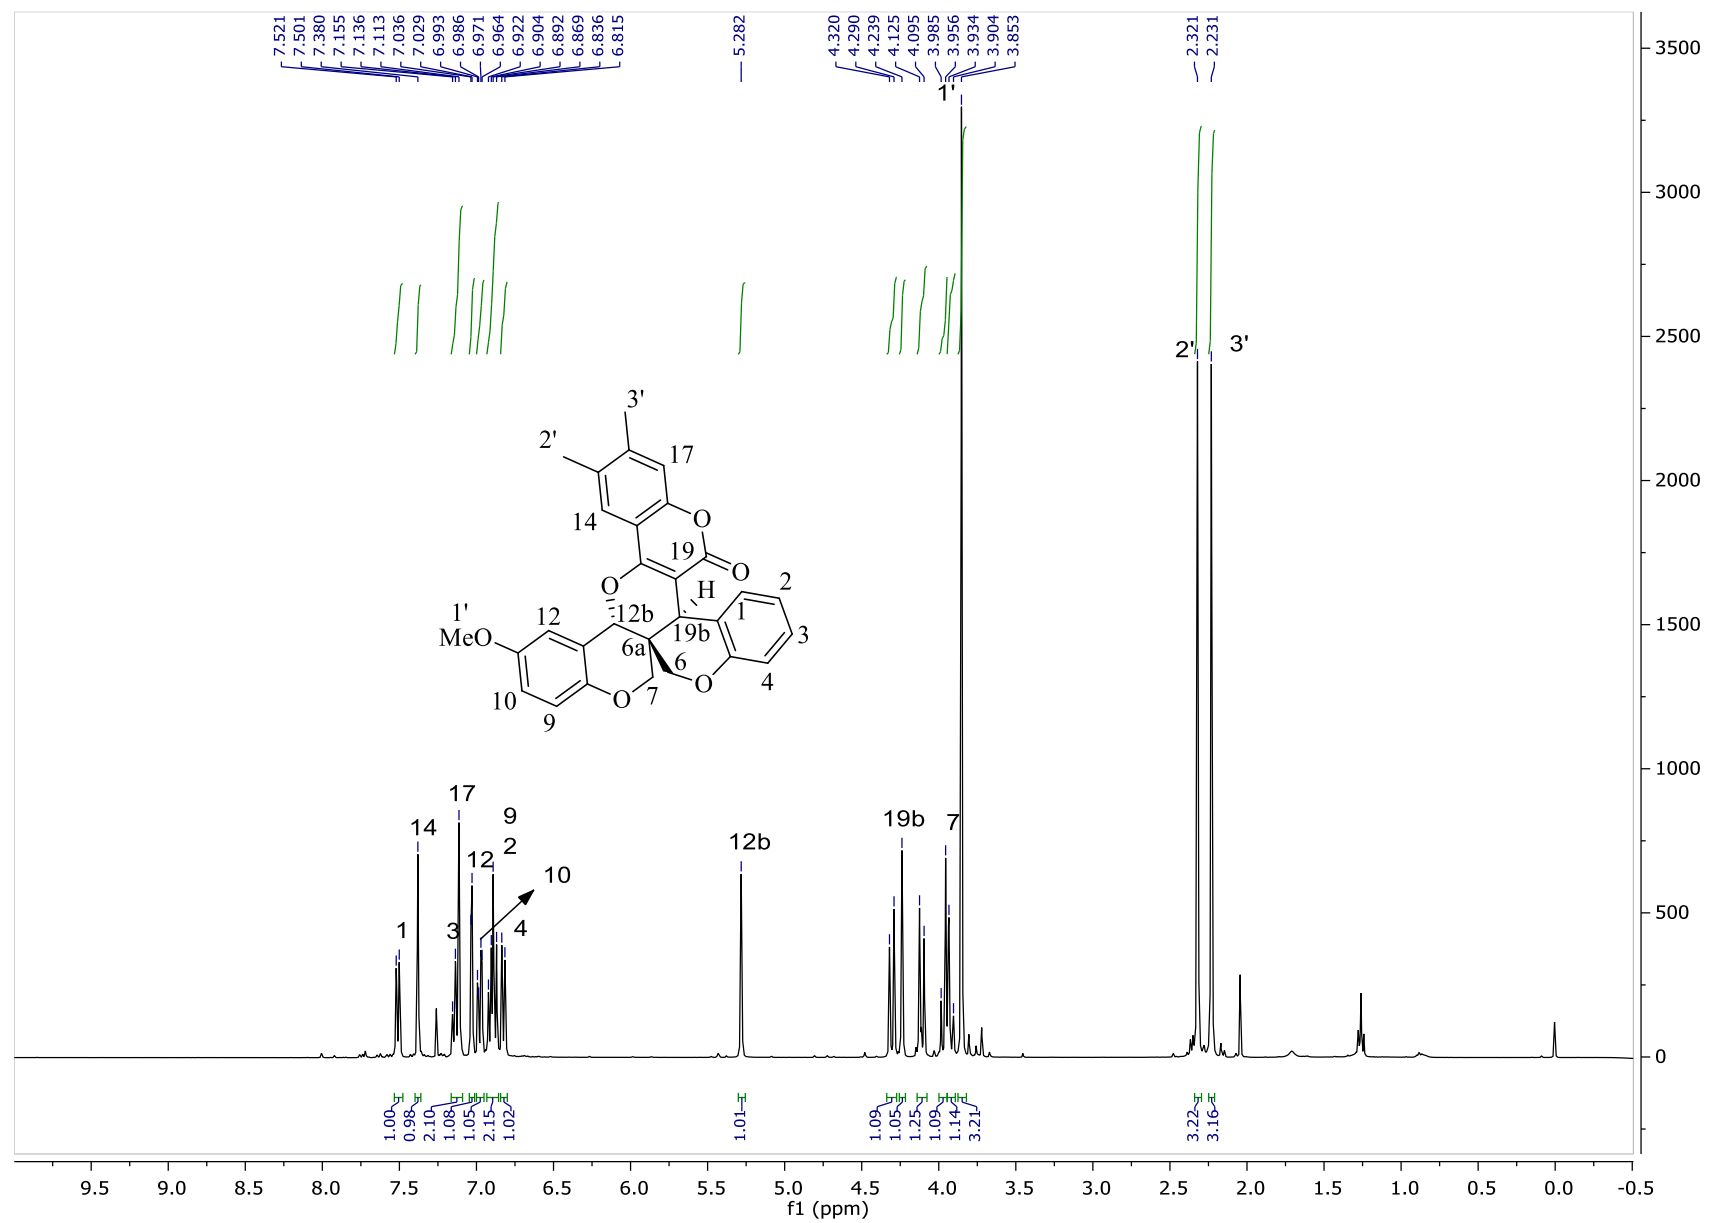

Figure S45. <sup>1</sup>H-NMR spectrum of *rac*-(6a*S*\*,12b*R*\*,19b*R*\*)-4**cb** in CDCl<sub>3</sub> at 400 MHz.

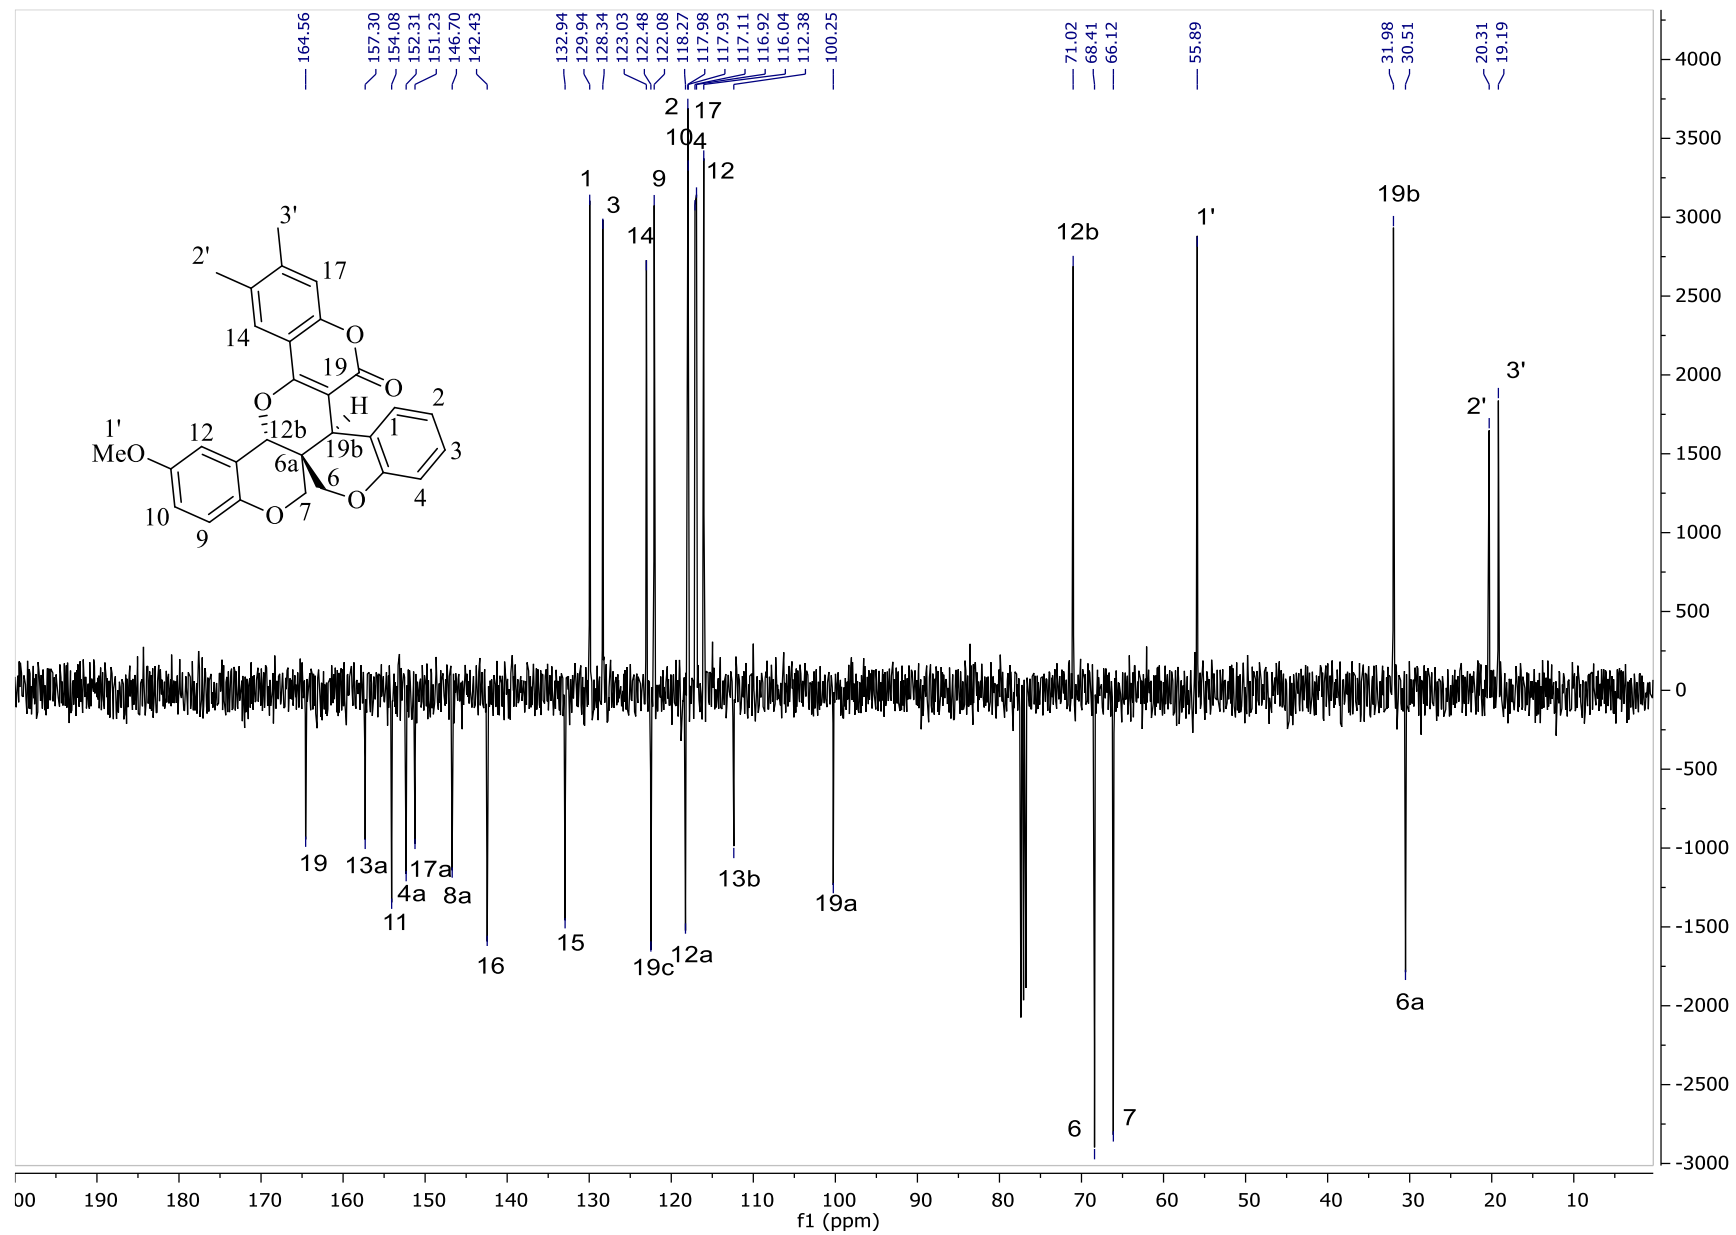

Figure S46. <sup>13</sup>C-NMR spectrum of *rac*-(6a*S*\*,12b*R*\*,19b*R*\*)-4**cb** in CDCl<sub>3</sub> at 100 MHz.

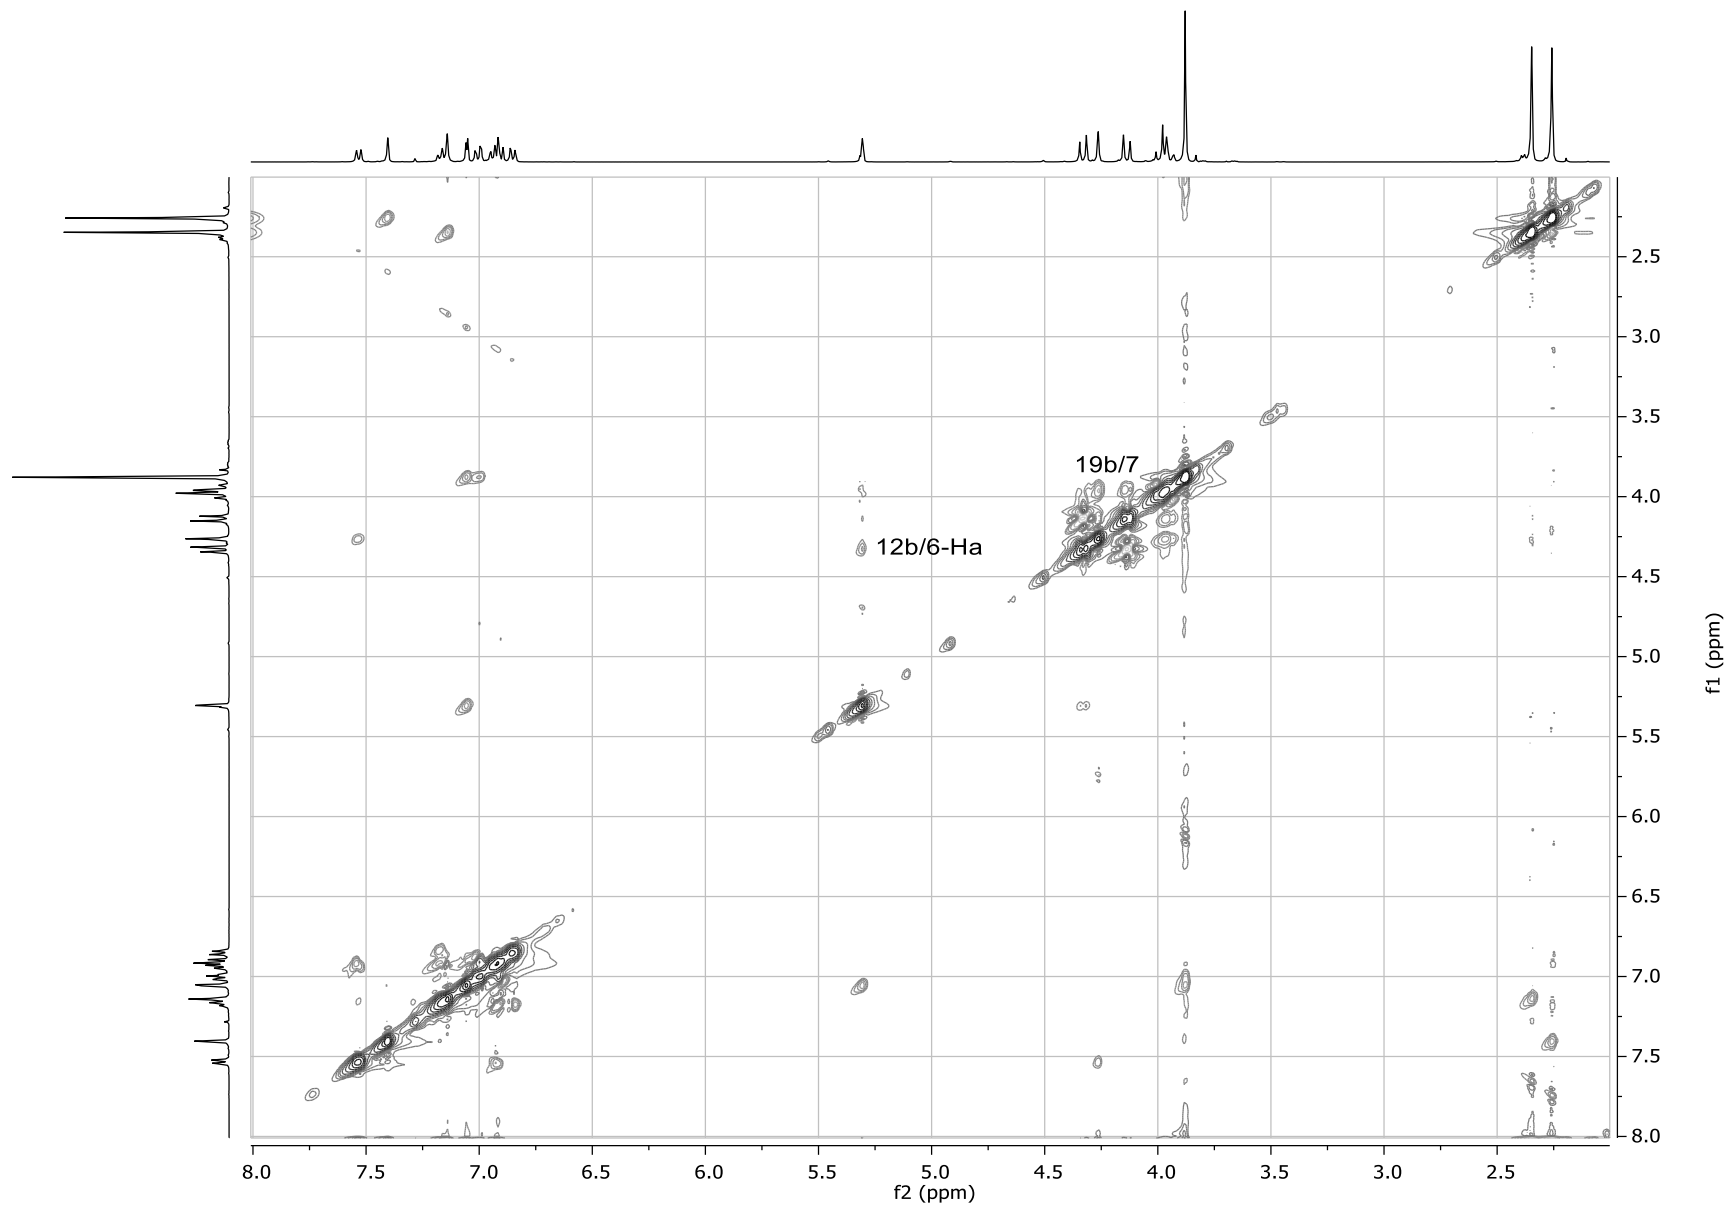

Figure S47. NOESY spectrum of *rac*-(6a*S*\*,12b*R*\*,19b*R*\*)-4**cb** in CDCl<sub>3</sub> at 400 MHz.

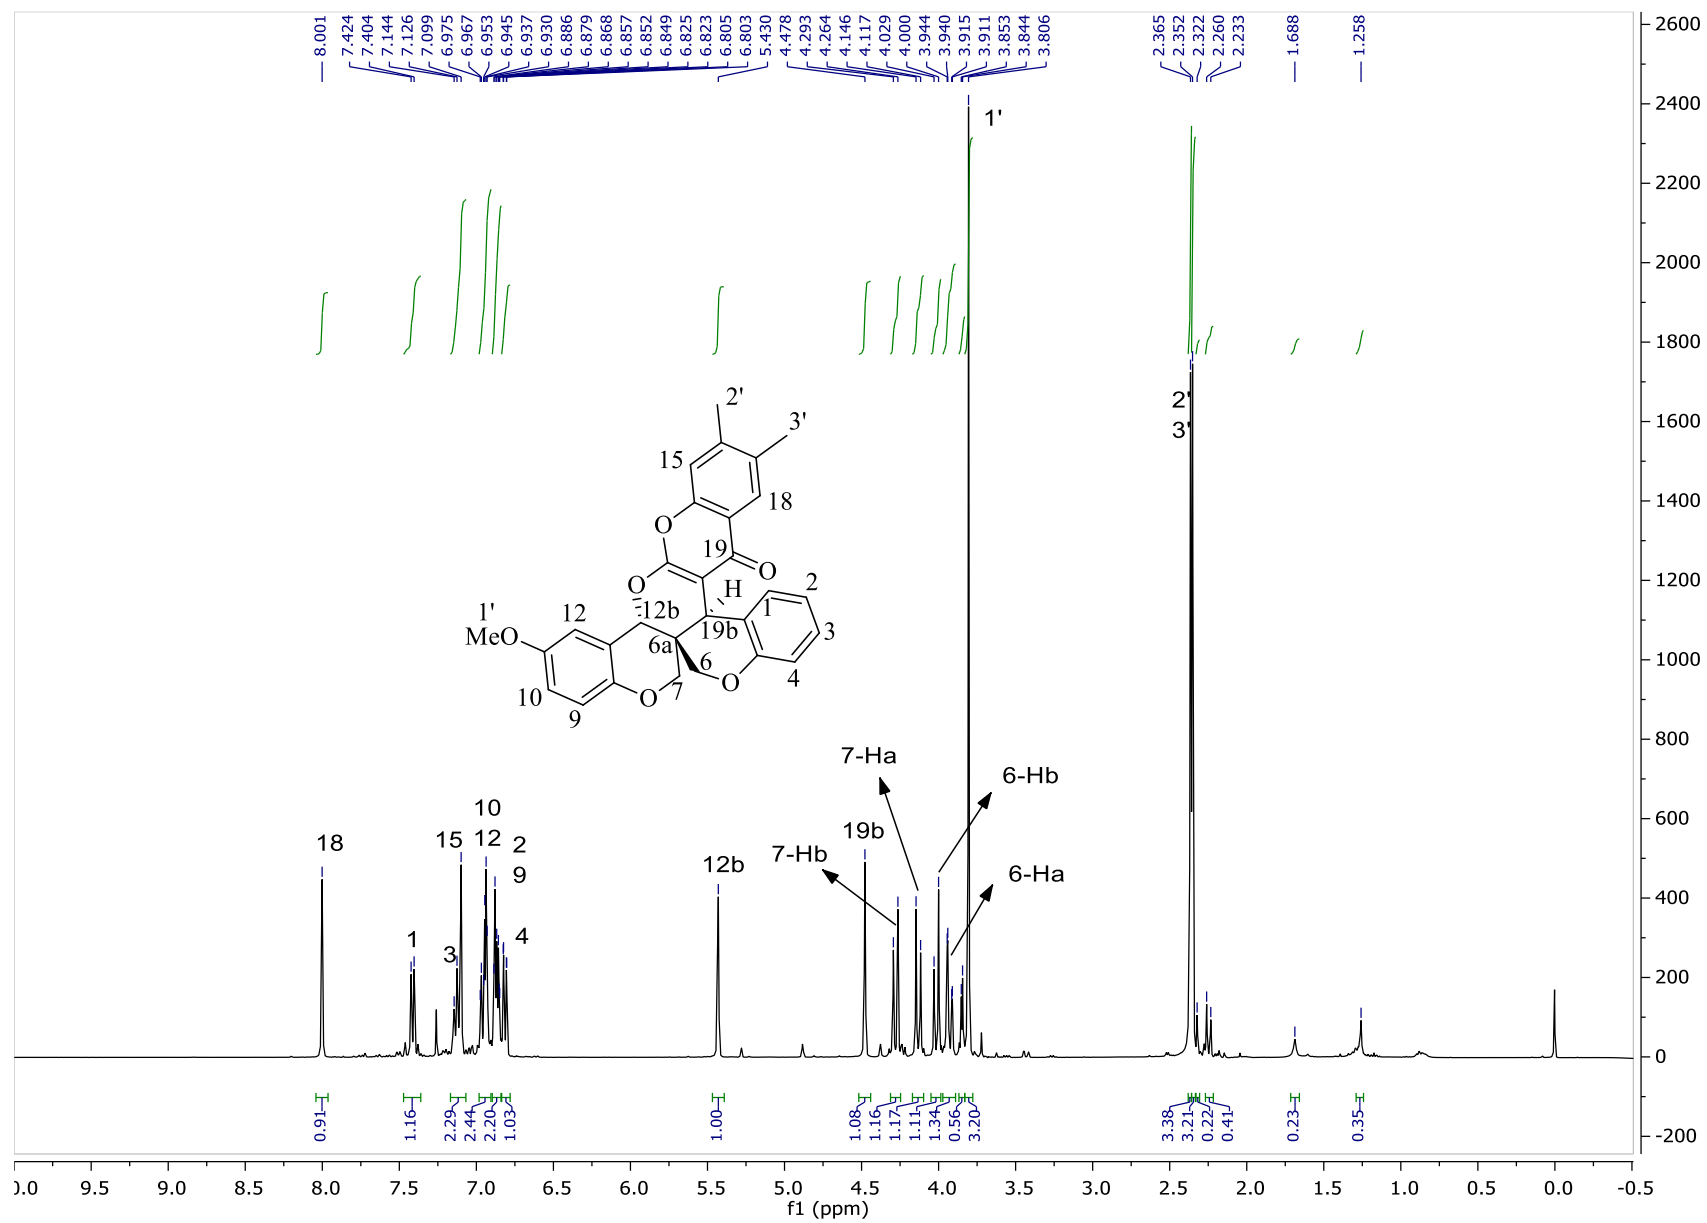

Figure S48. <sup>1</sup>H-NMR spectrum of *rac*-(6a*S*\*,12b*R*\*,19b*R*\*)-6cb in CDCl<sub>3</sub> at 400 MHz.

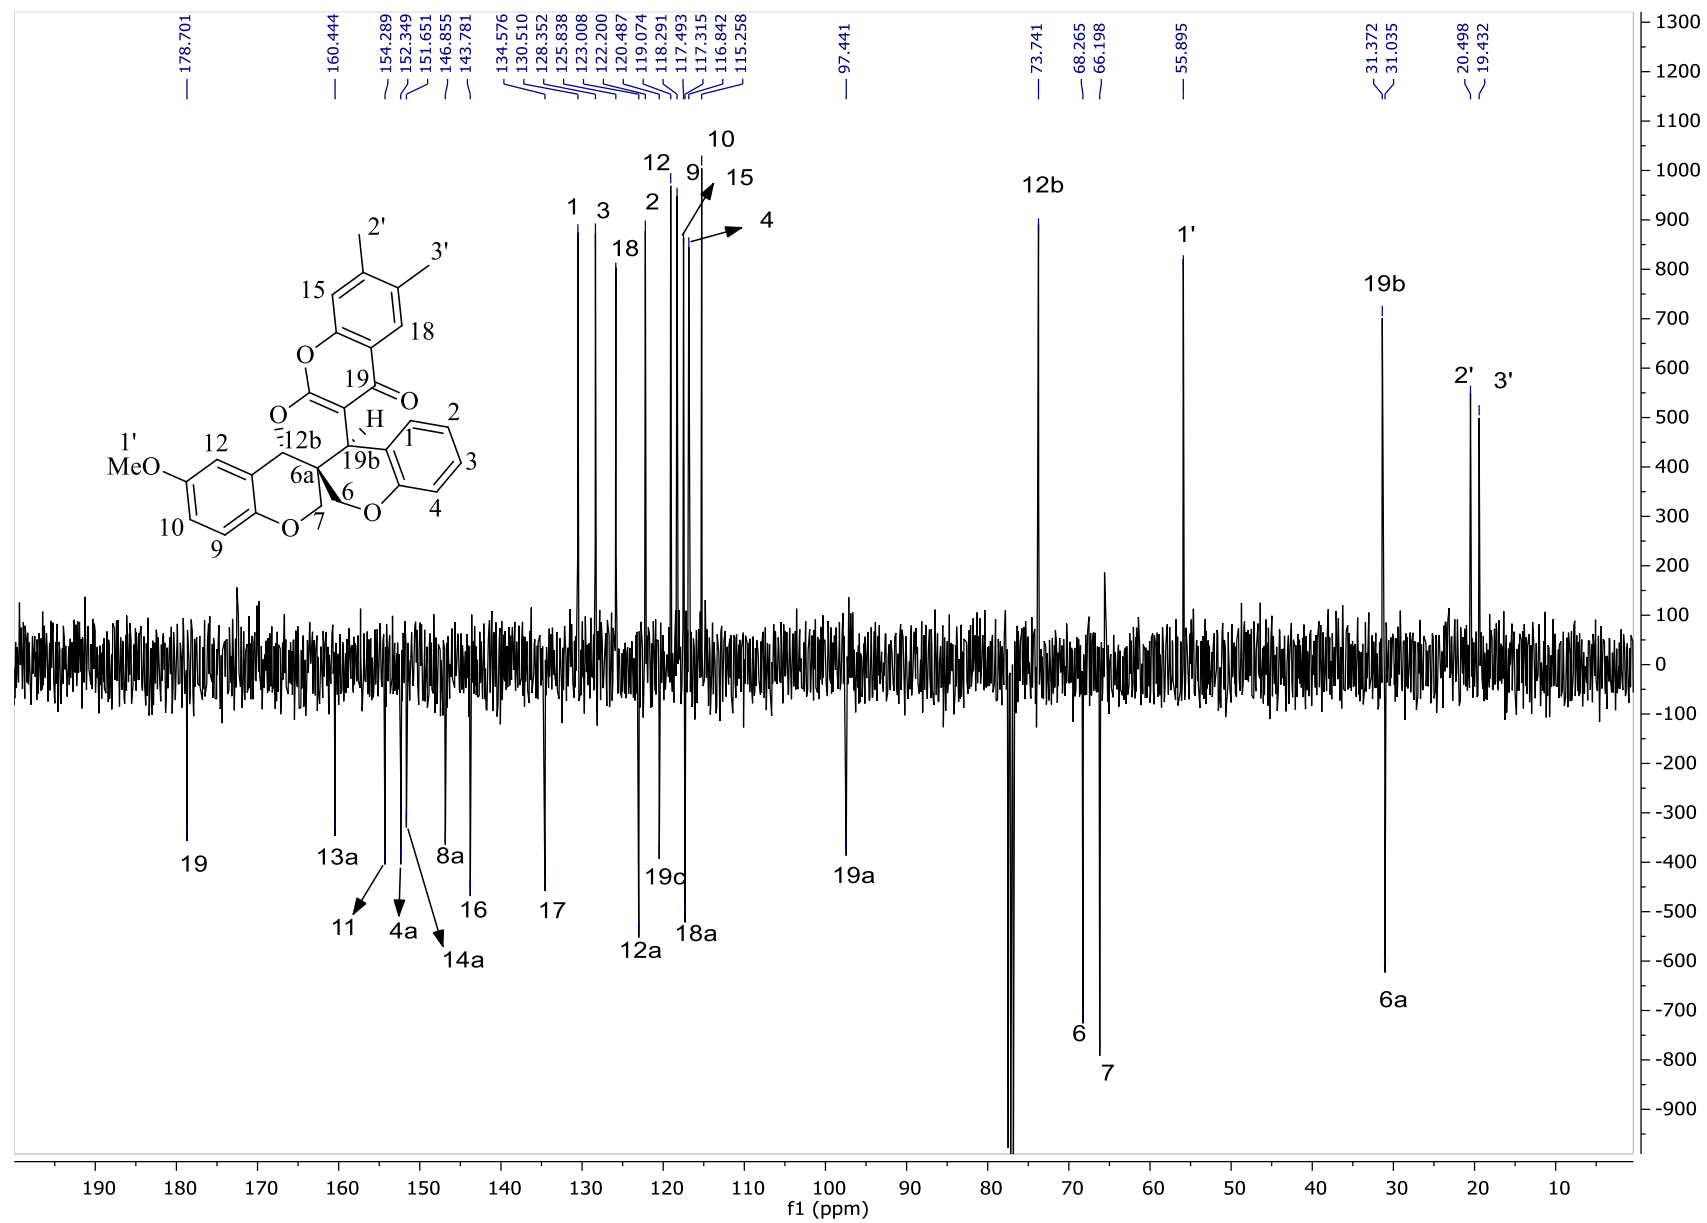

Figure S49. <sup>13</sup>C-NMR spectrum of *rac*-(6a*S*\*,12b*R*\*,19b*R*\*)-6**cb** in CDCl<sub>3</sub> at 100 MHz.

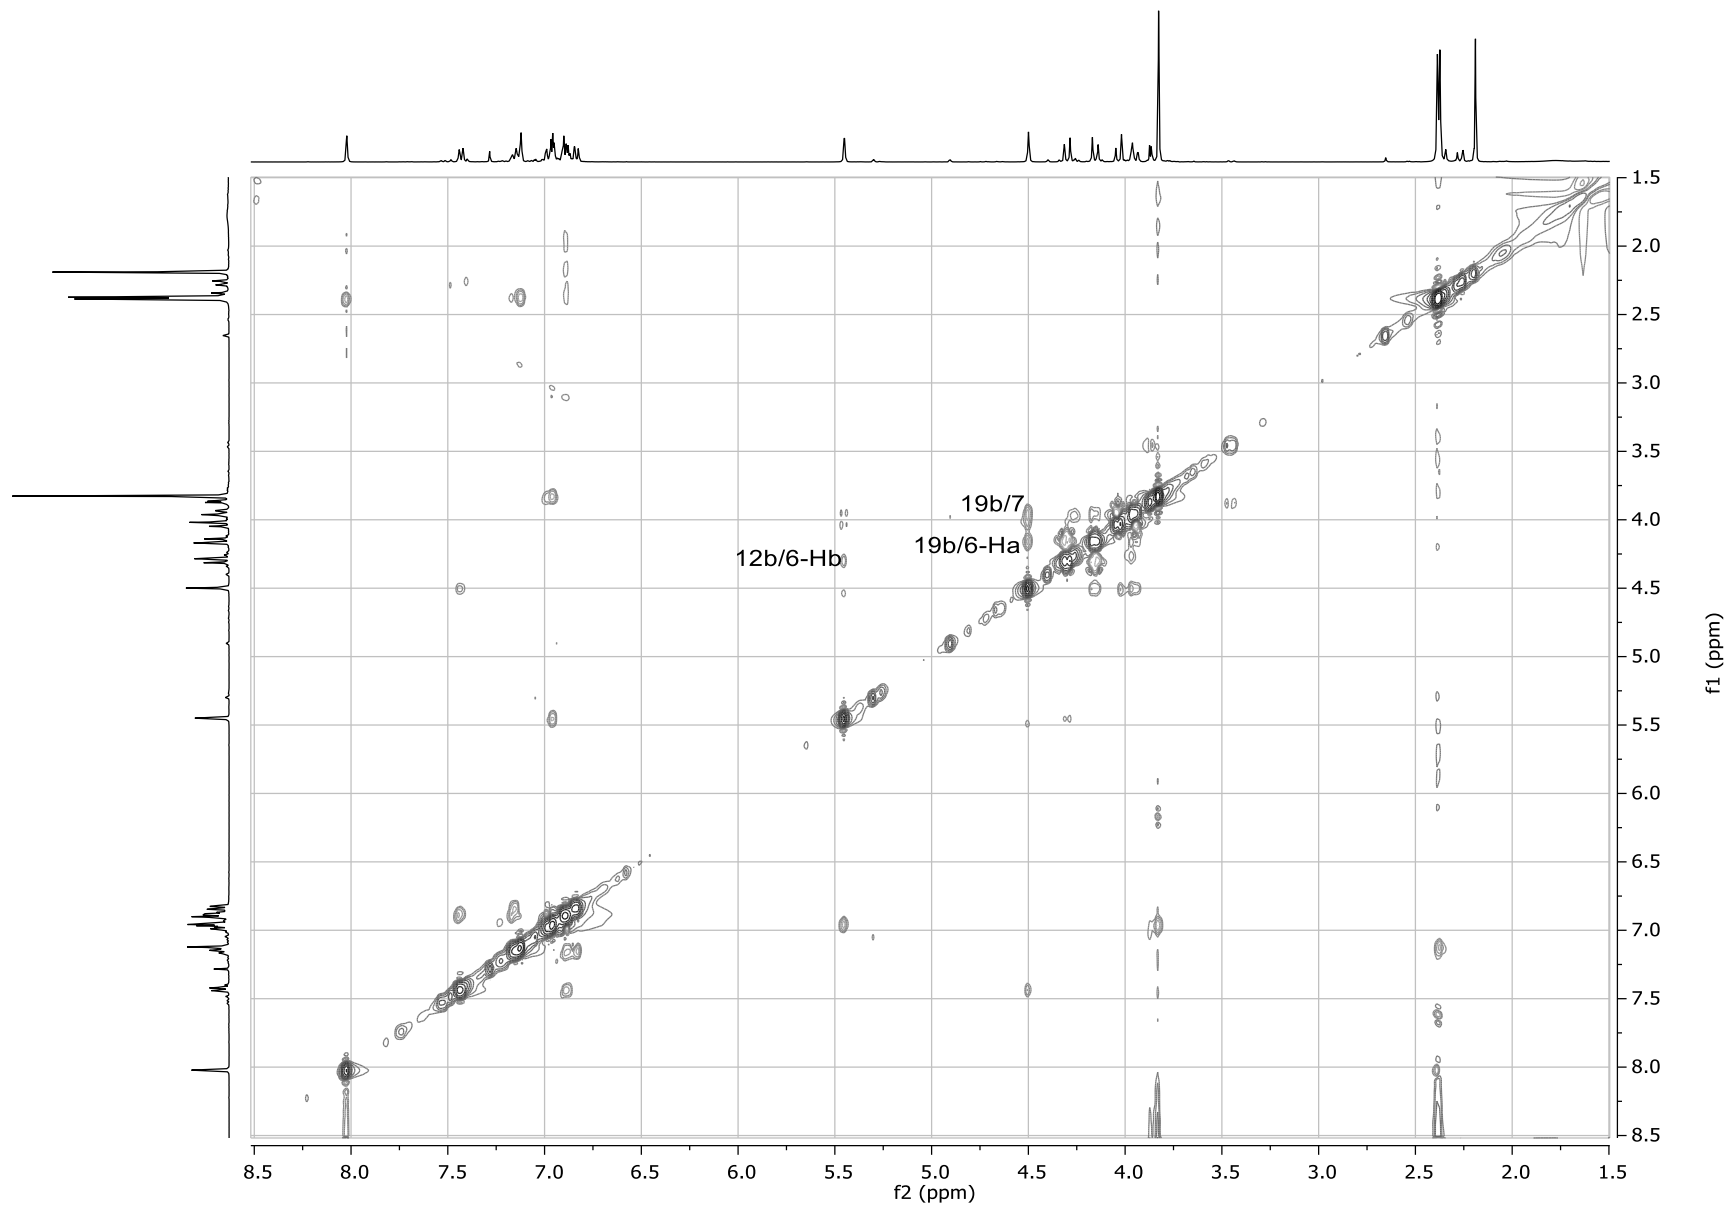

Figure S50. NOESY spectrum of *rac*-(6a*S*\*,12b*R*\*,19b*R*\*)-6cb in CDCl<sub>3</sub> at 400 MHz.

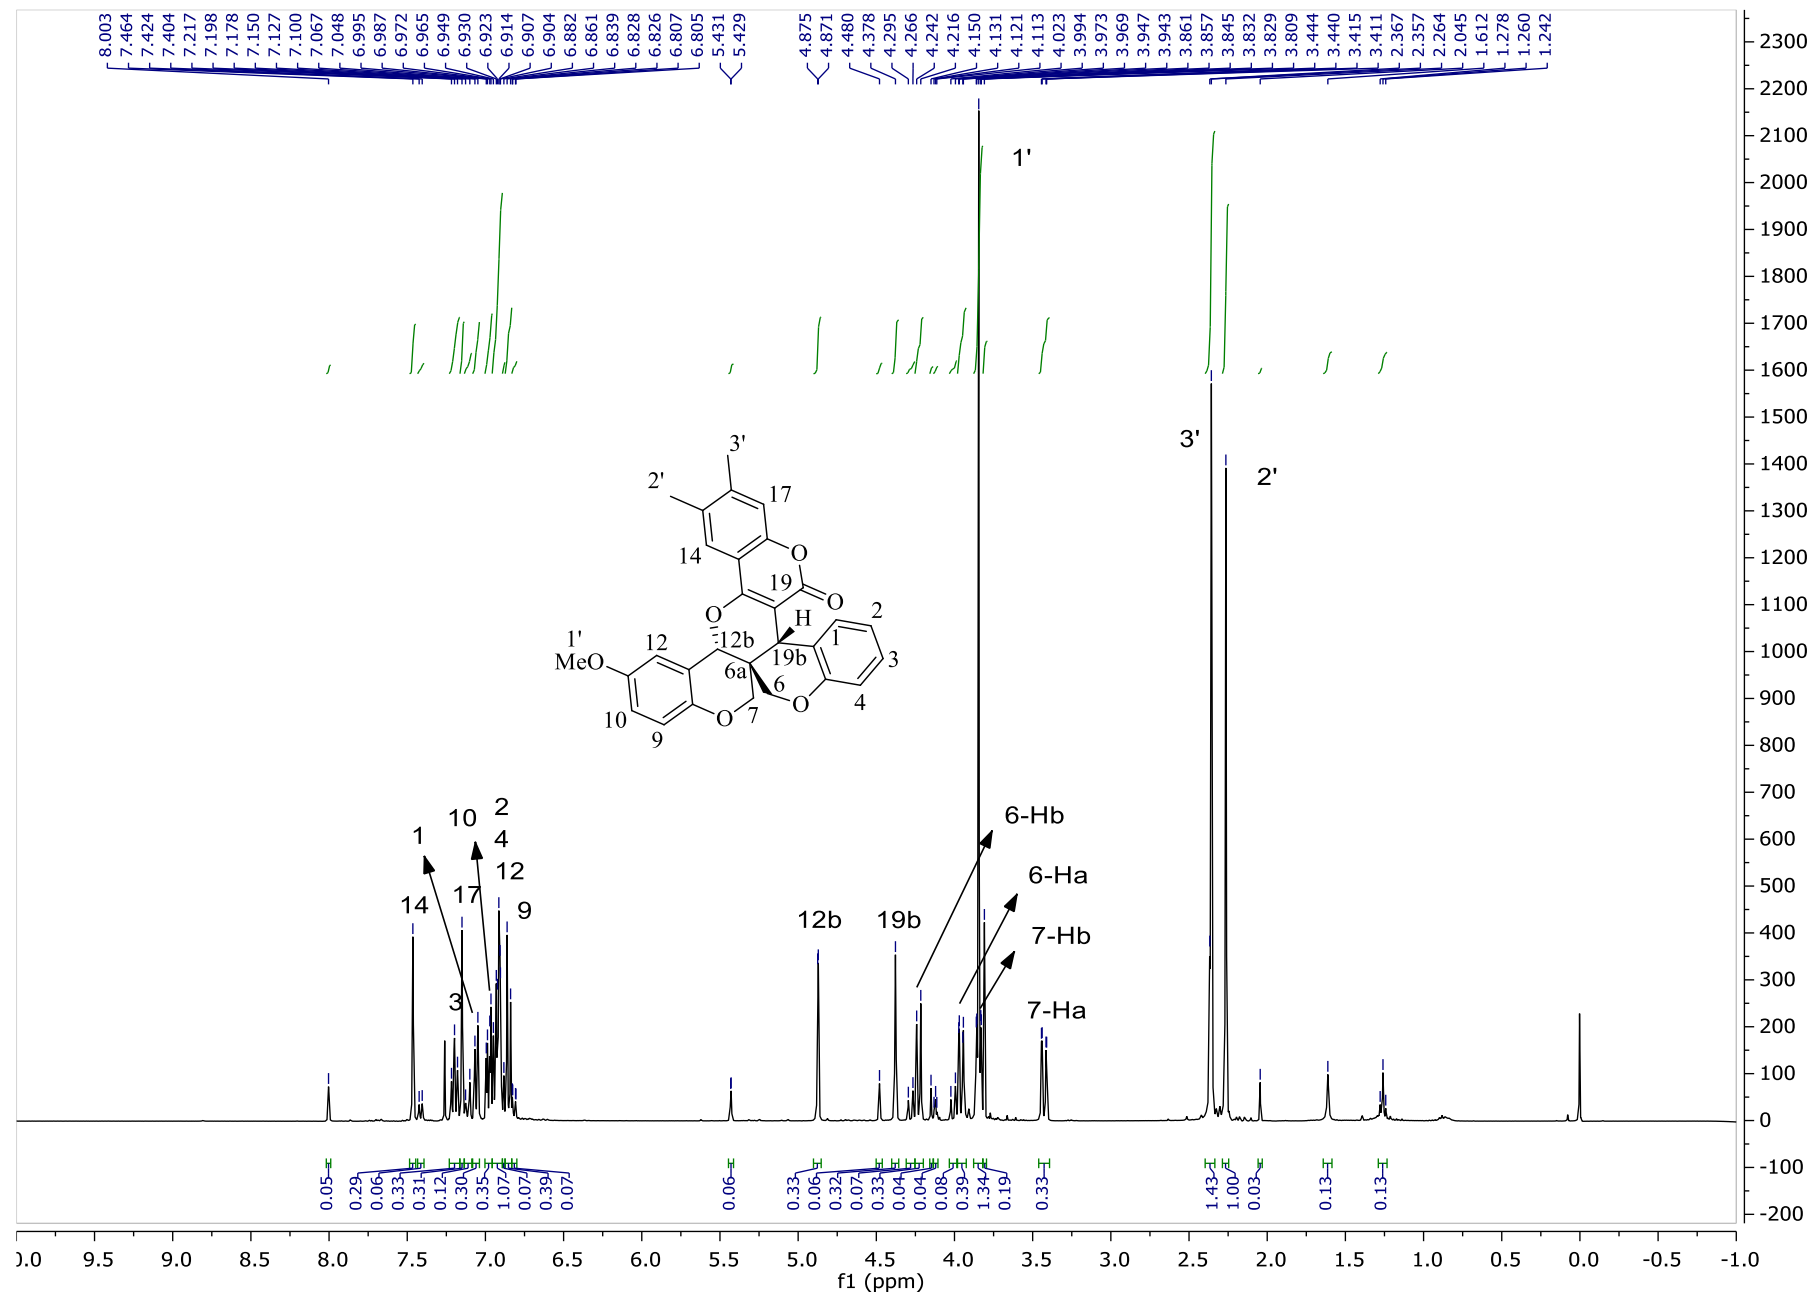

Figure S51. <sup>1</sup>H-NMR spectrum of *rac*-(6a*S*<sup>\*</sup>,12b*R*<sup>\*</sup>,19b*S*<sup>\*</sup>)-**5cb** in CDCl<sub>3</sub> at 400 MHz.

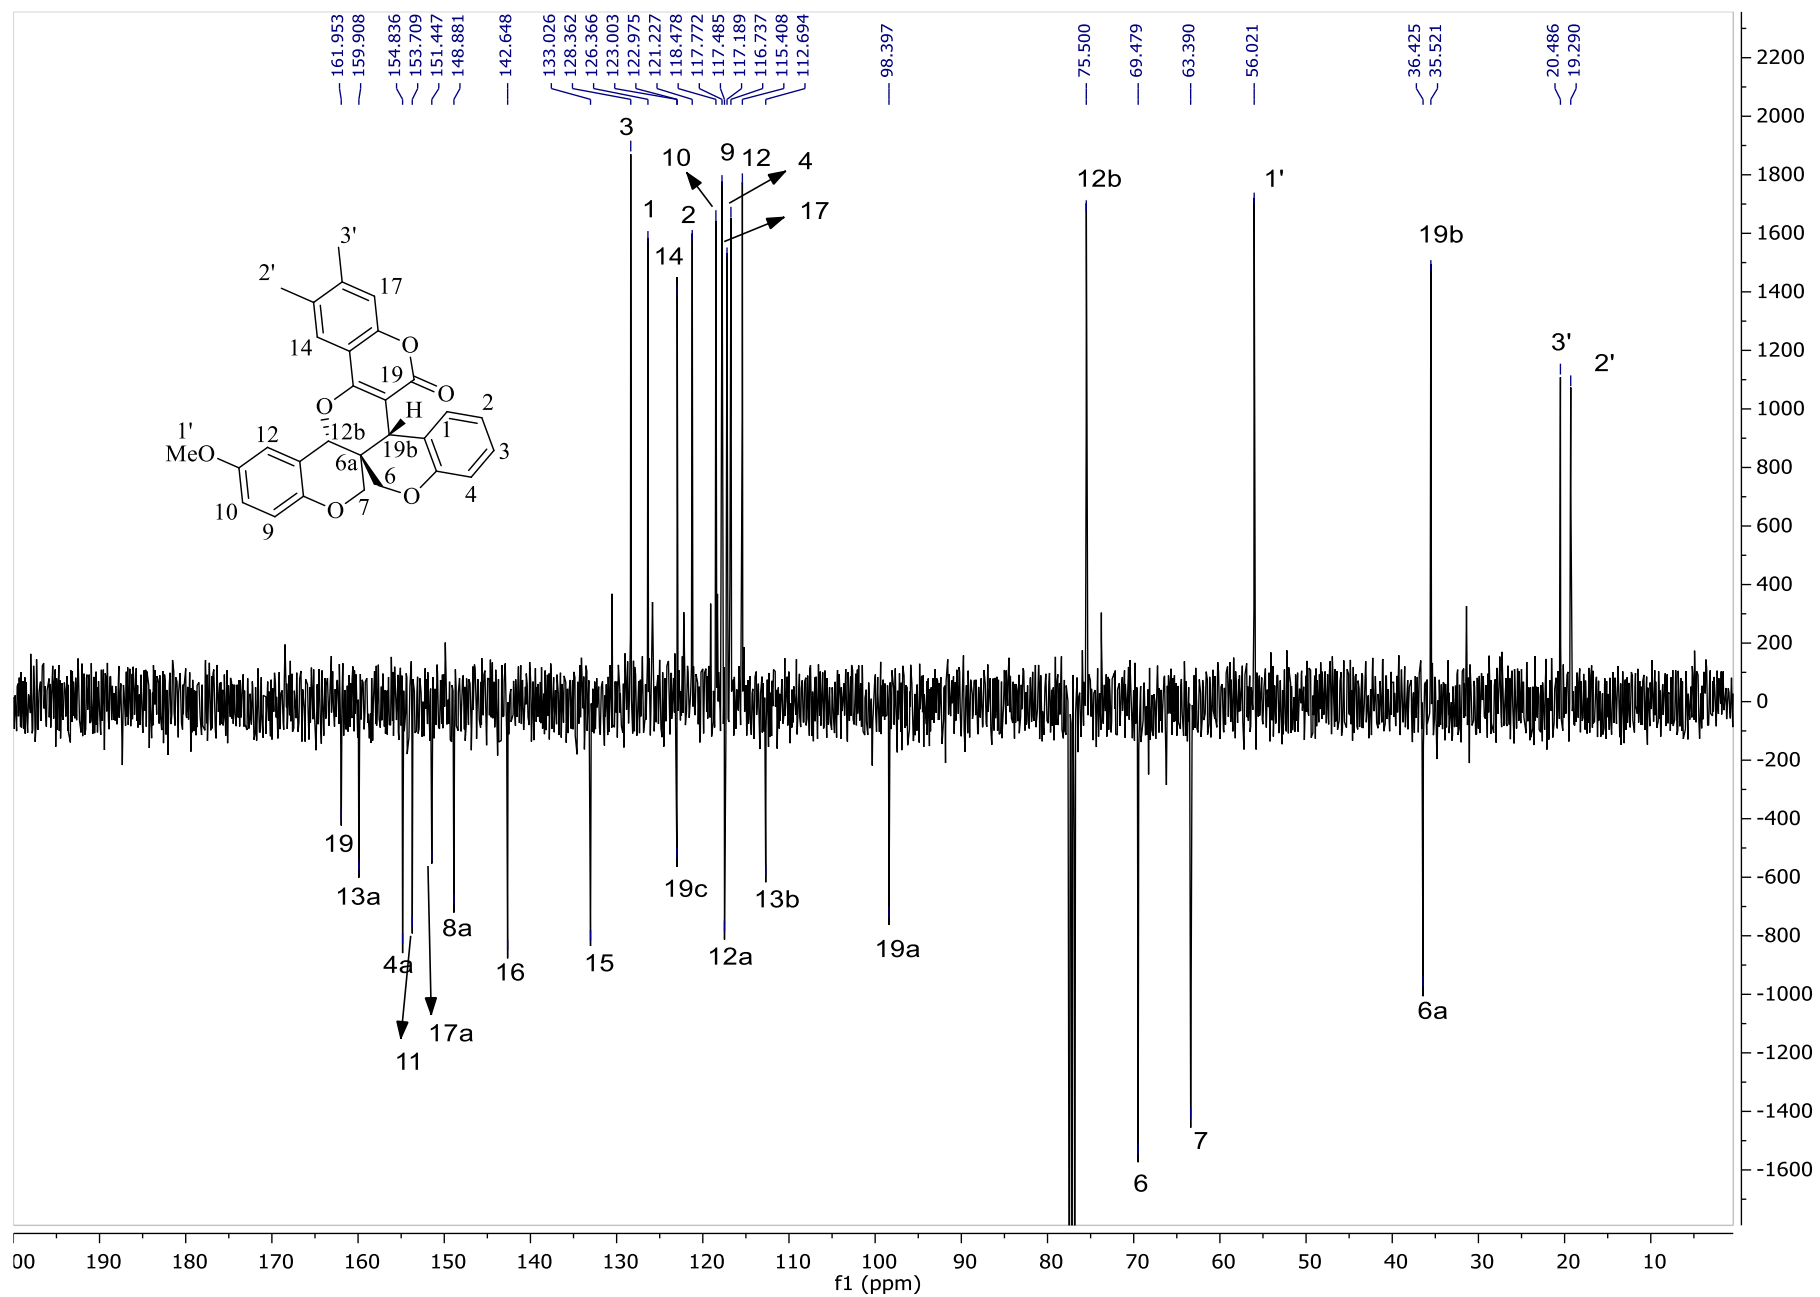

Figure S52.  $^{13}\text{C}$ -NMR spectrum of *rac*-(6a*S*\*,12b*R*\*,19b*S*\*)-5**cb** in  $\text{CDCl}_3$  at 100 MHz.

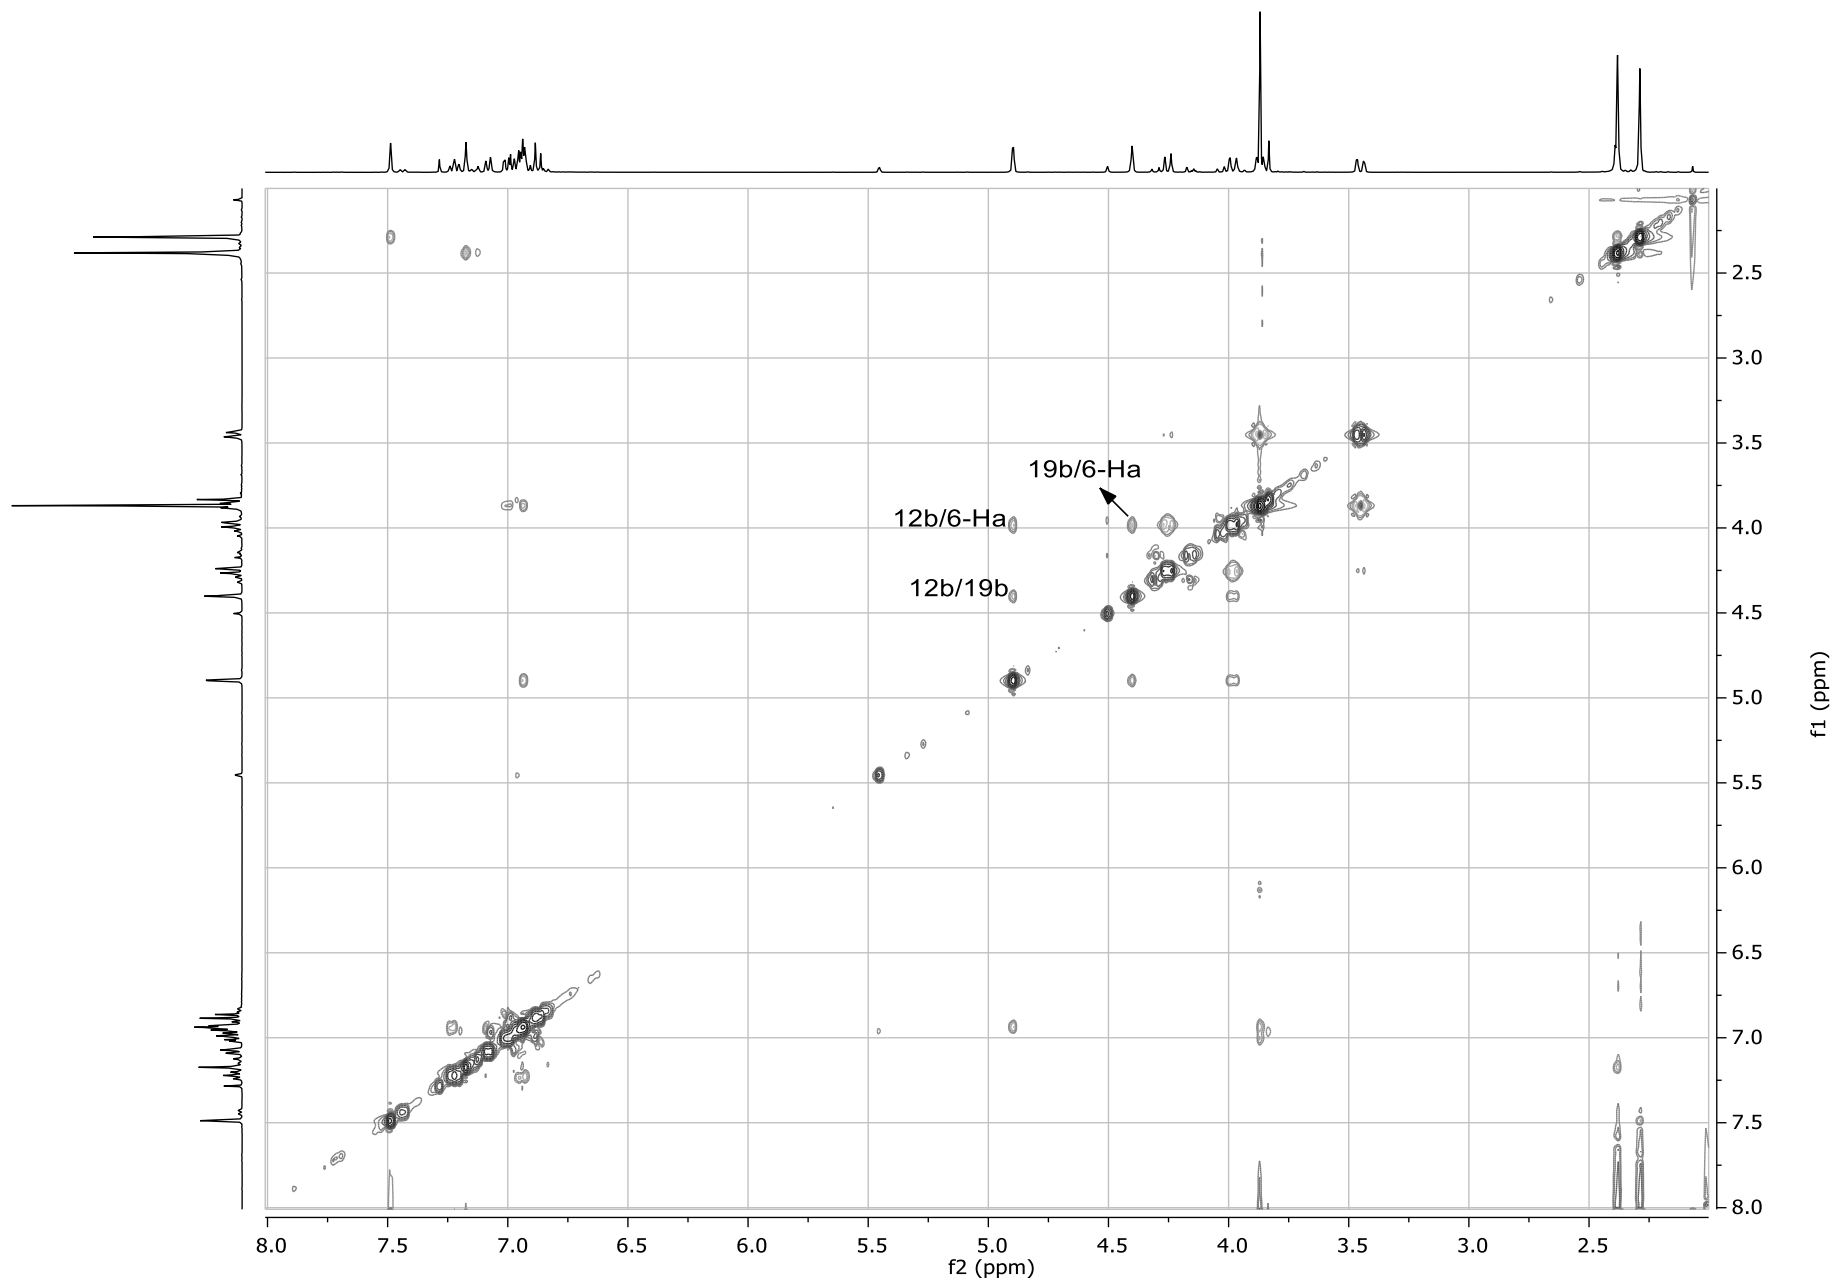

Figure S53. NOESY spectrum of *rac*-(6a*S*\*,12b*R*\*,19b*S*\*)-5**cb** in CDCl<sub>3</sub> at 400 MHz.

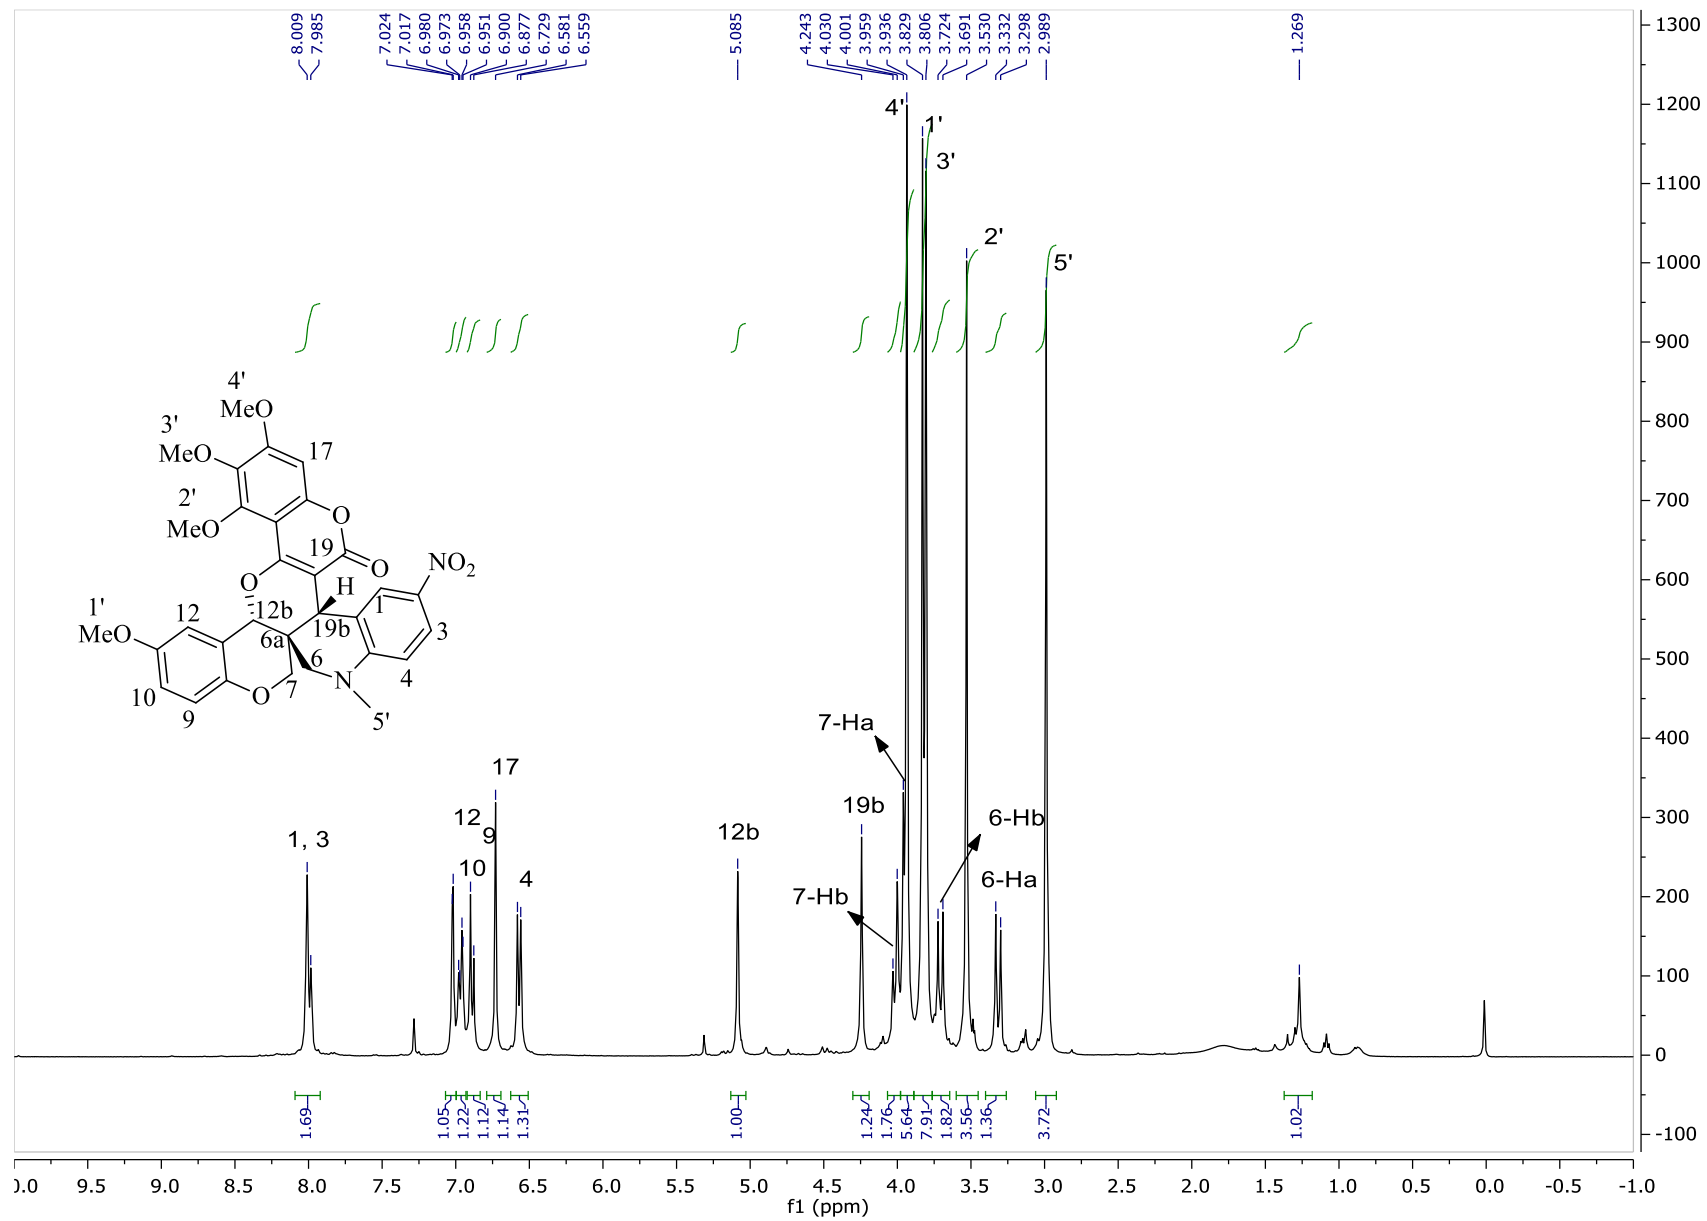

Figure S54. <sup>1</sup>H-NMR spectrum of *rac*-(6a*S*\*,12b*R*\*,19b*S*\*)-4ac in CDCl<sub>3</sub> at 400 MHz.

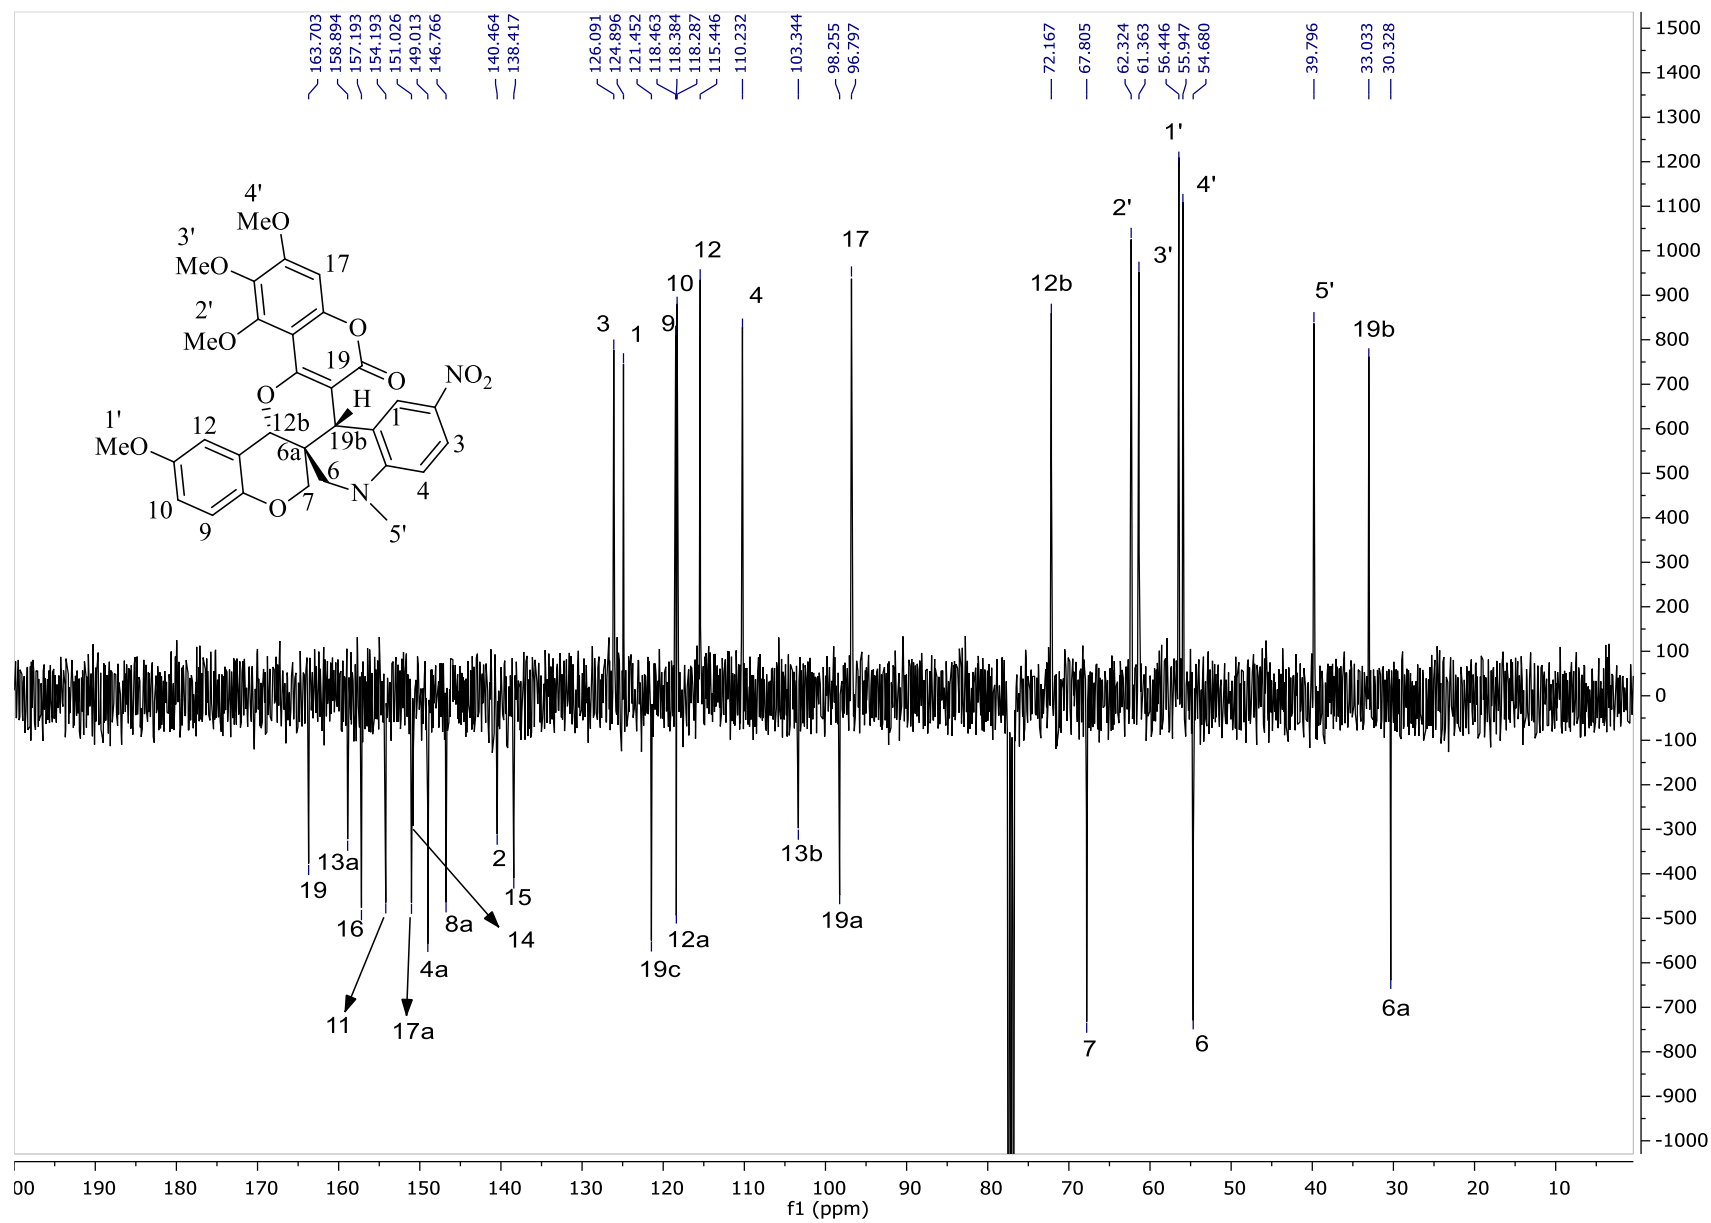

Figure S55.  $^{13}\text{C}$ -NMR spectrum of *rac*-(6a*S*\*,12b*R*\*,19b*S*\*)-4ac in  $\text{CDCl}_3$  at 100 MHz.

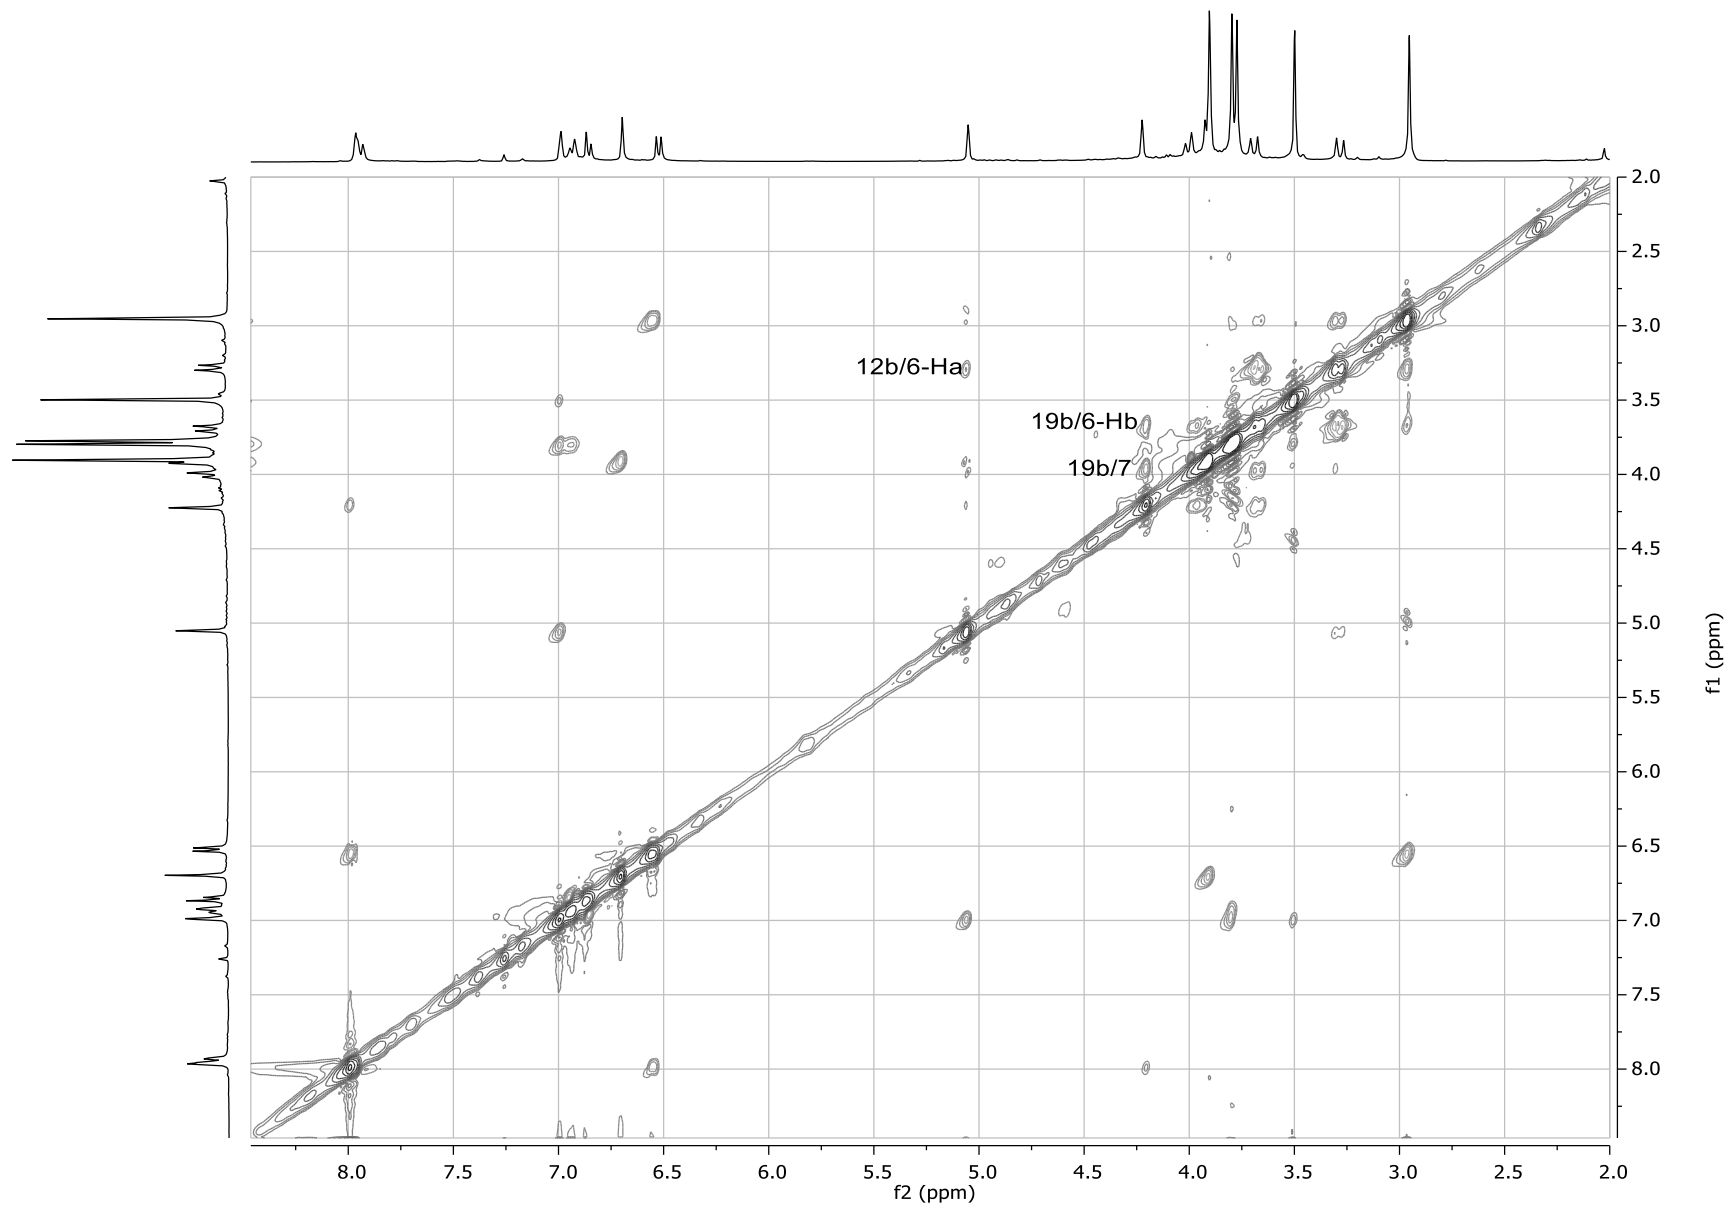

Figure S56. NOESY spectrum of *rac*-(6a*S*<sup>\*</sup>,12b*R*<sup>\*</sup>,19b*S*<sup>\*</sup>)-**4ac** in CDCl<sub>3</sub> at 400 MHz.

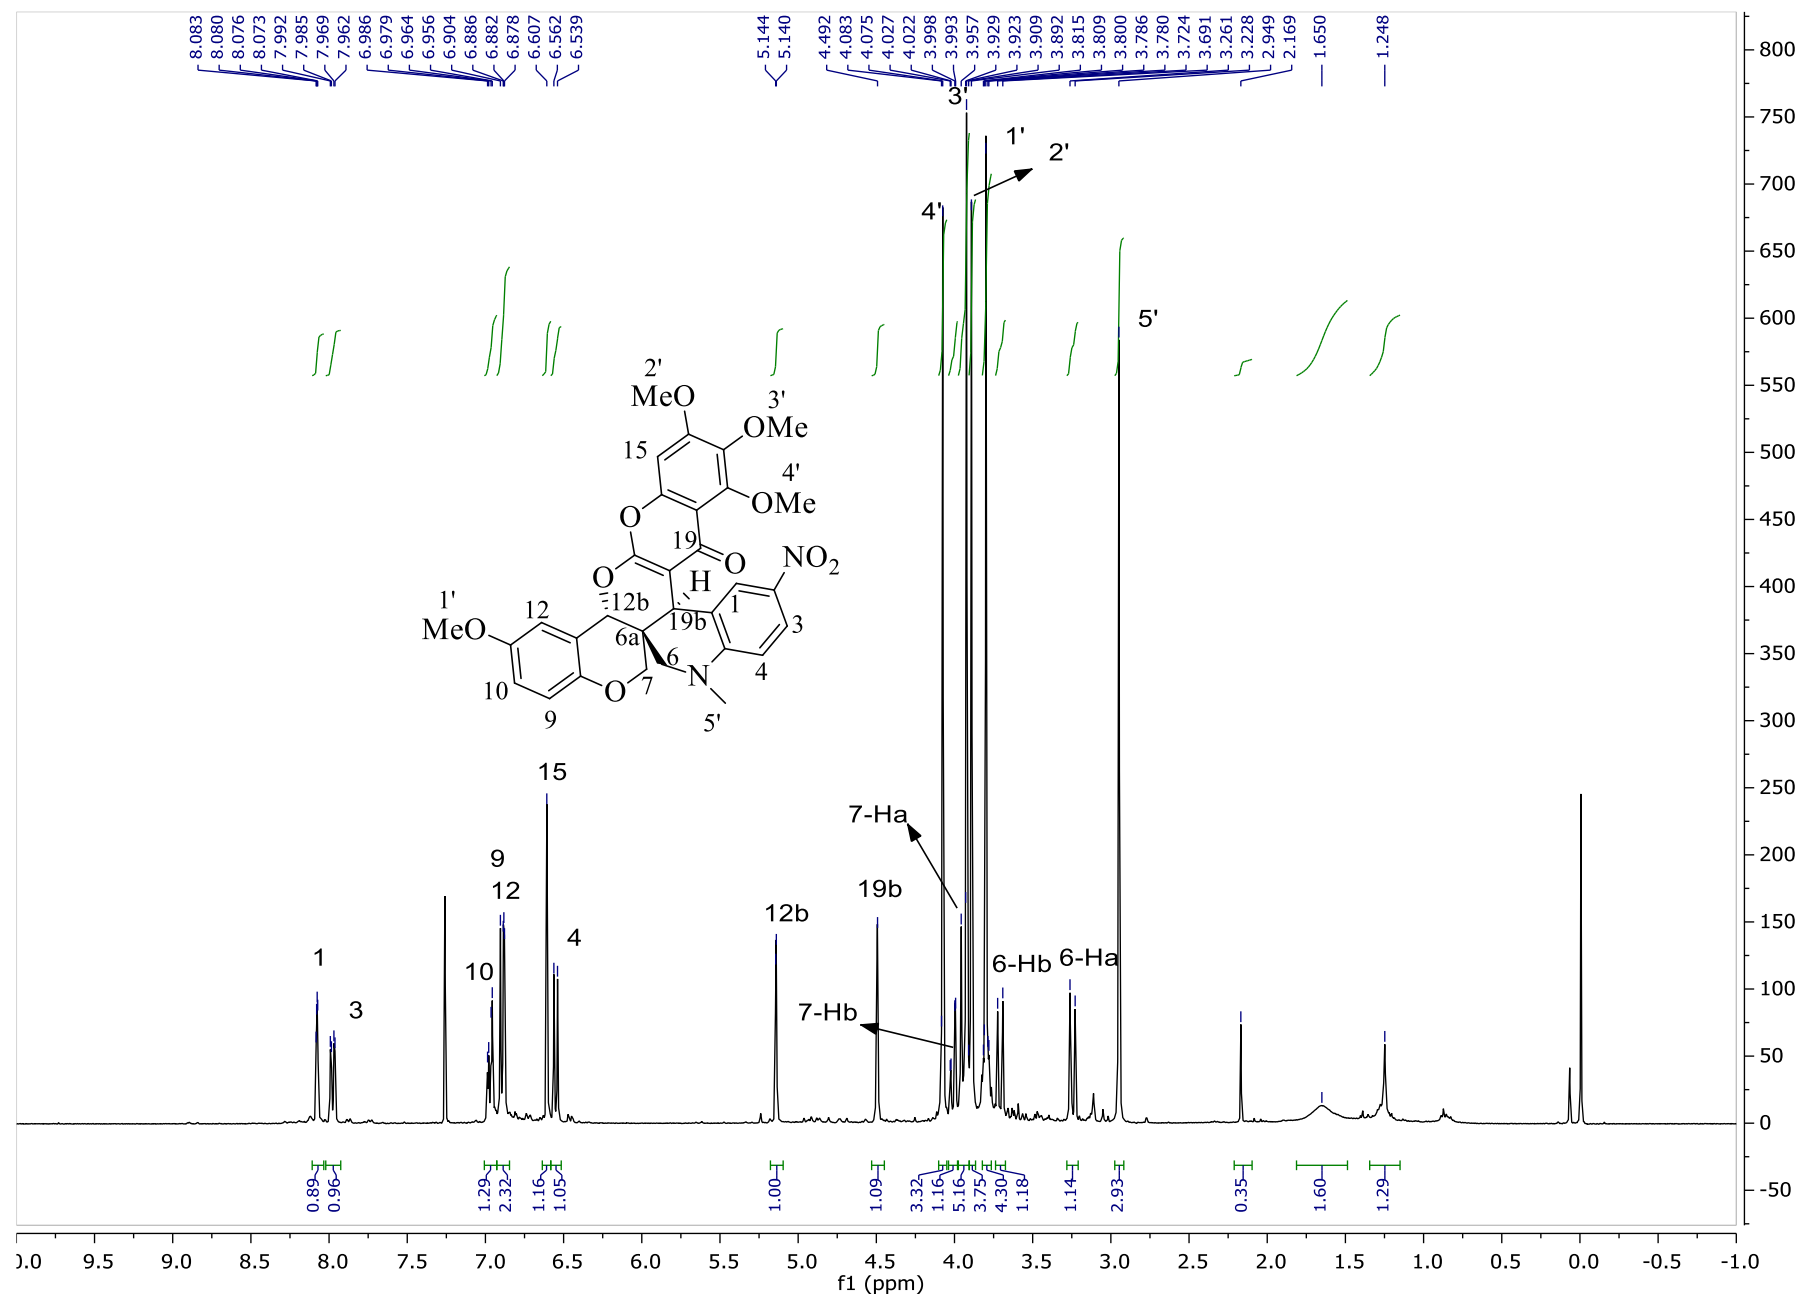

Figure S57. <sup>1</sup>H-NMR spectrum of *rac*-(6a*S*\*,12b*R*\*,19b*S*\*)-6ac in CDCl<sub>3</sub> at 400 MHz.

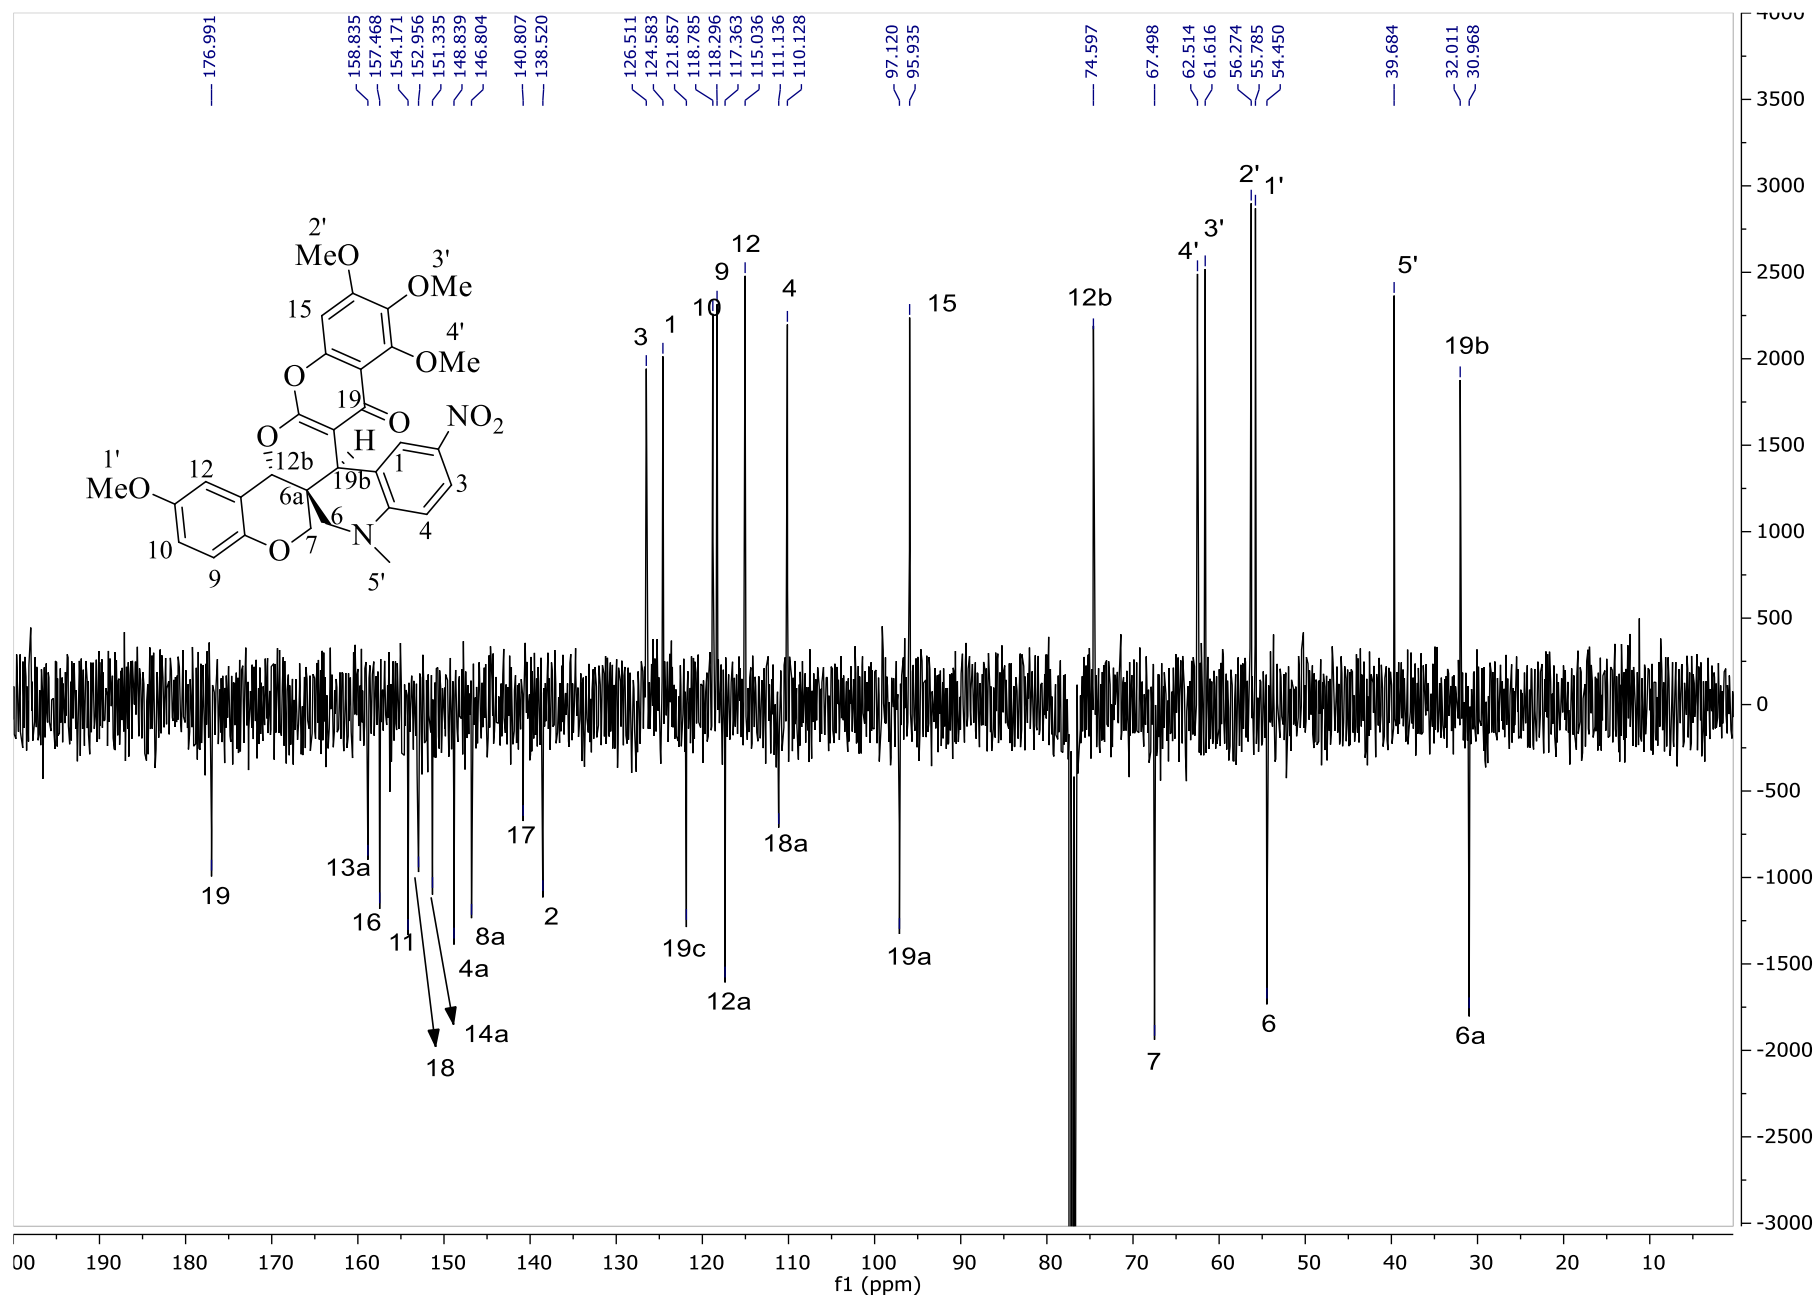

Figure S58.  $^{13}\text{C}$ -NMR spectrum of *rac*-(6a*S*\*,12b*R*\*,19b*S*\*)-6ac in  $\text{CDCl}_3$  at 100 MHz.

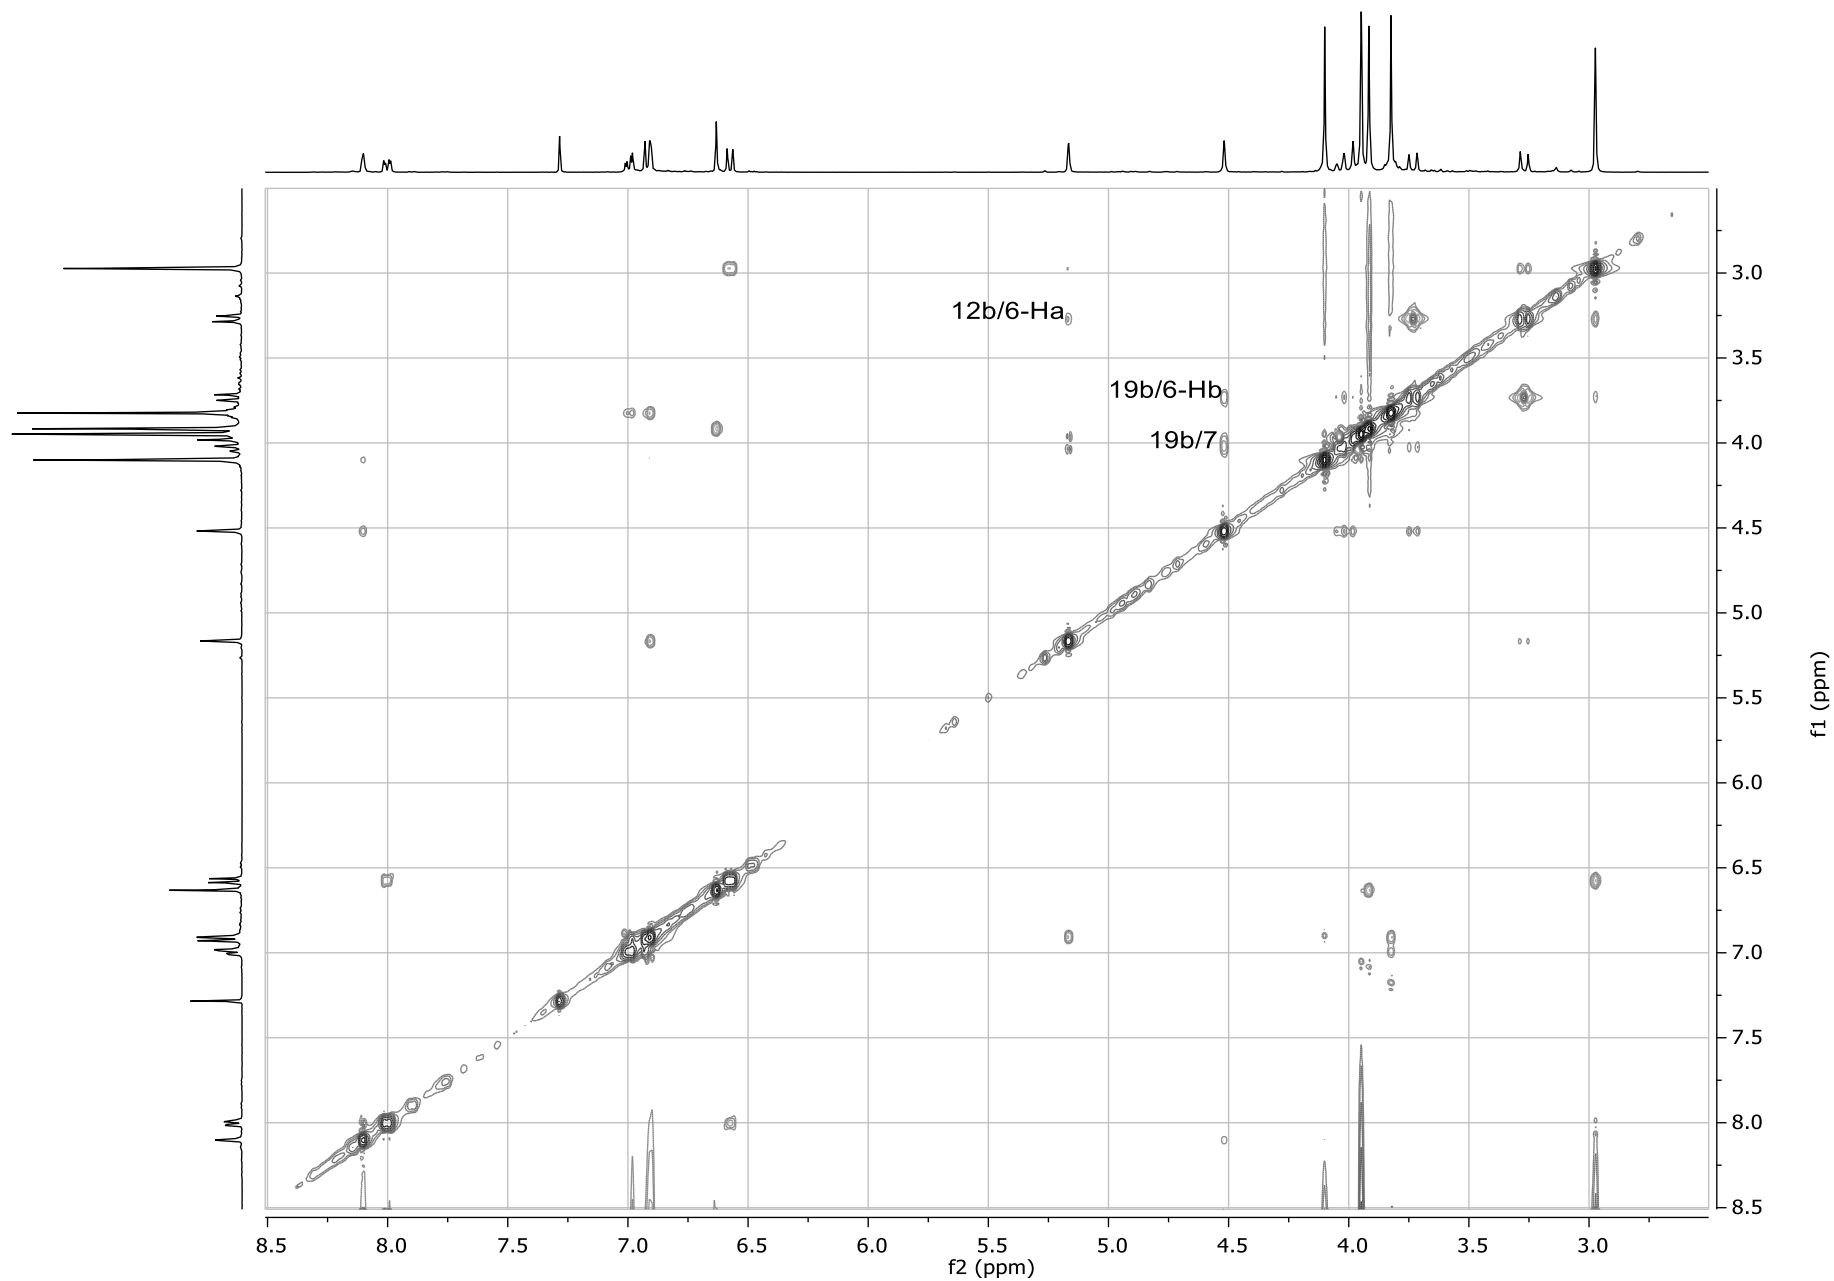

Figure S59. NOESY spectrum of *rac*-(6a*S*<sup>\*</sup>,12b*R*<sup>\*</sup>,19b*S*<sup>\*</sup>)-**6ac** in CDCl<sub>3</sub> at 400 MHz.



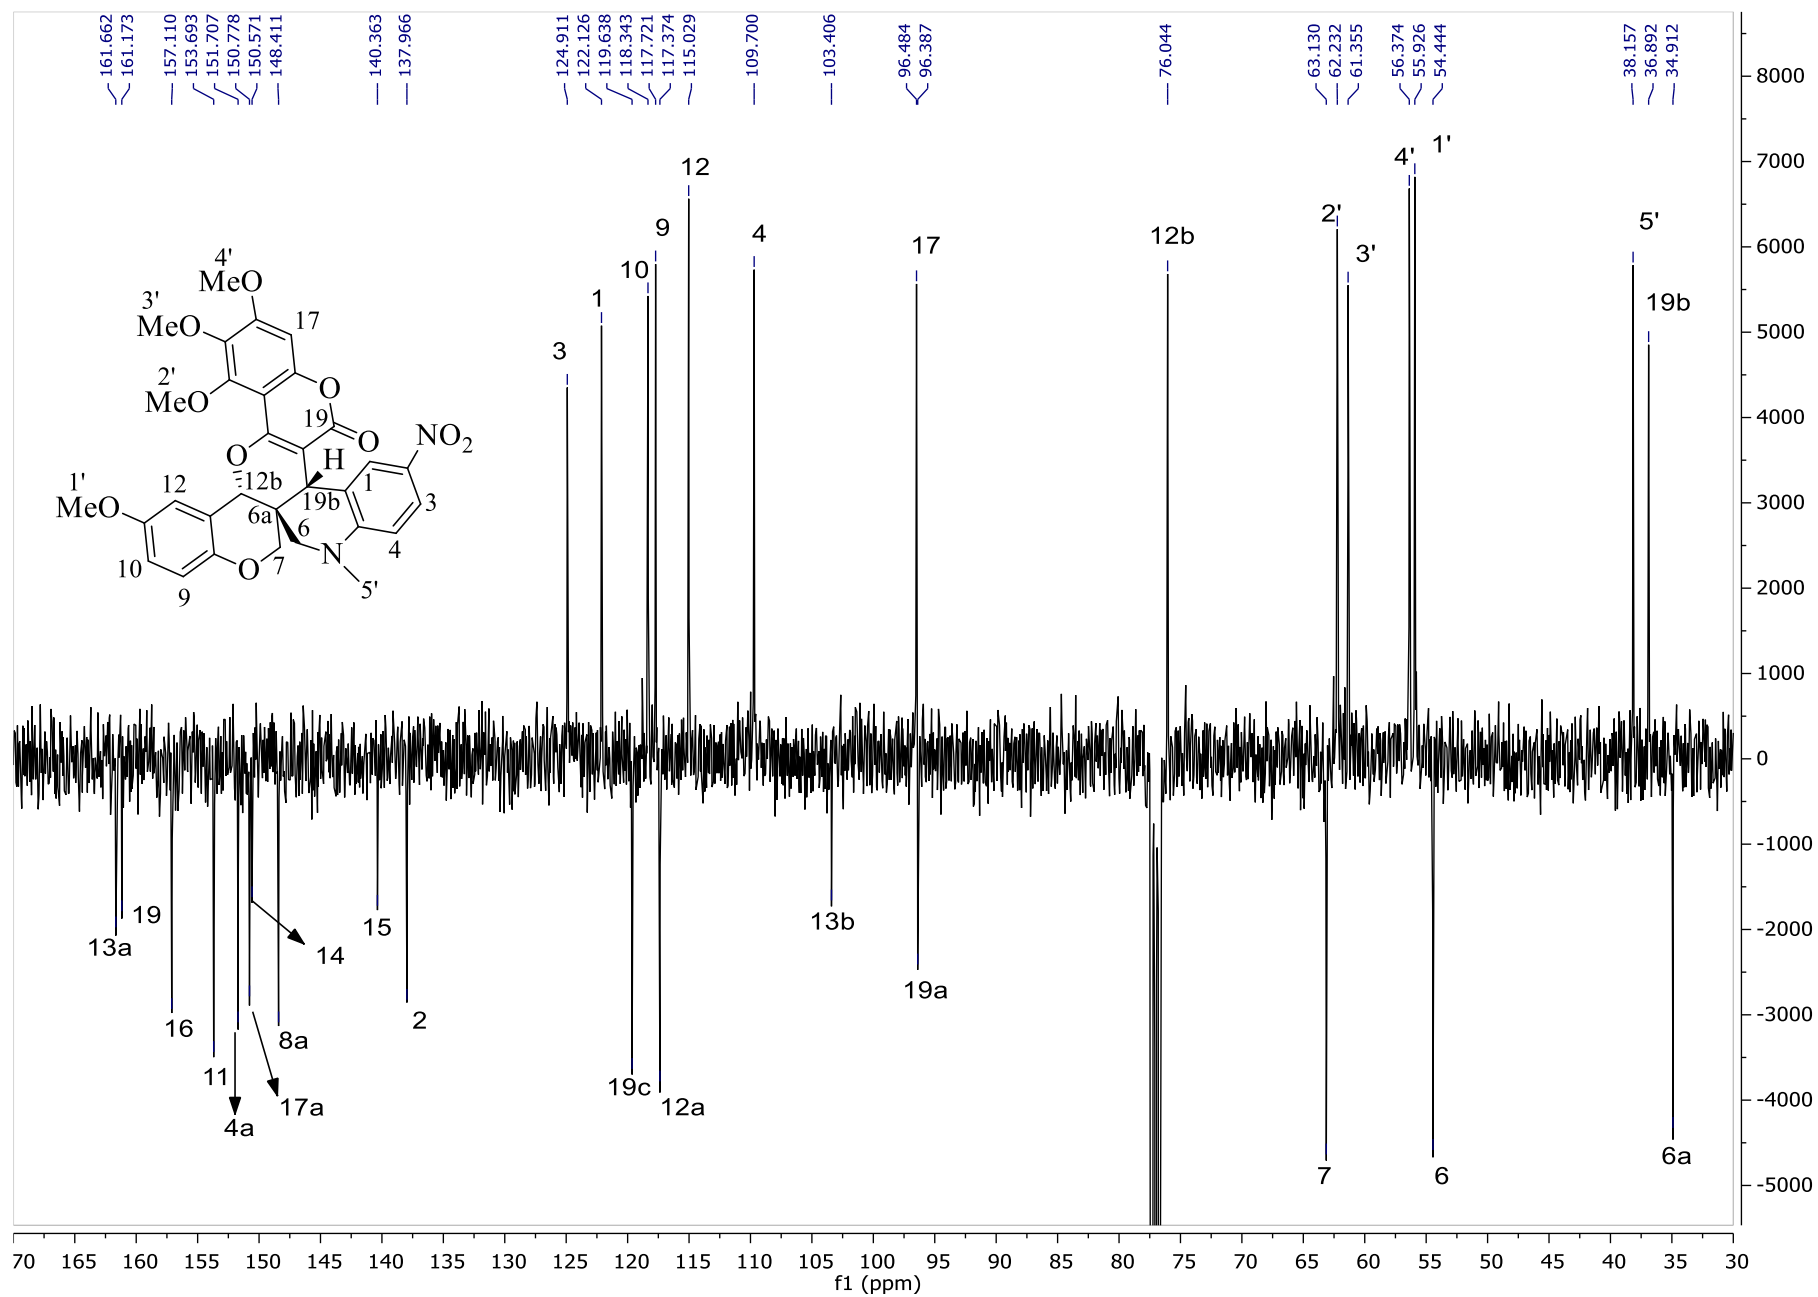

Figure S61.  $^{13}\text{C}$ -NMR spectrum of *rac*-(6a*S*\*,12b*R*\*,19b*R*\*)-5ac in  $\text{CDCl}_3$  at 100 MHz.

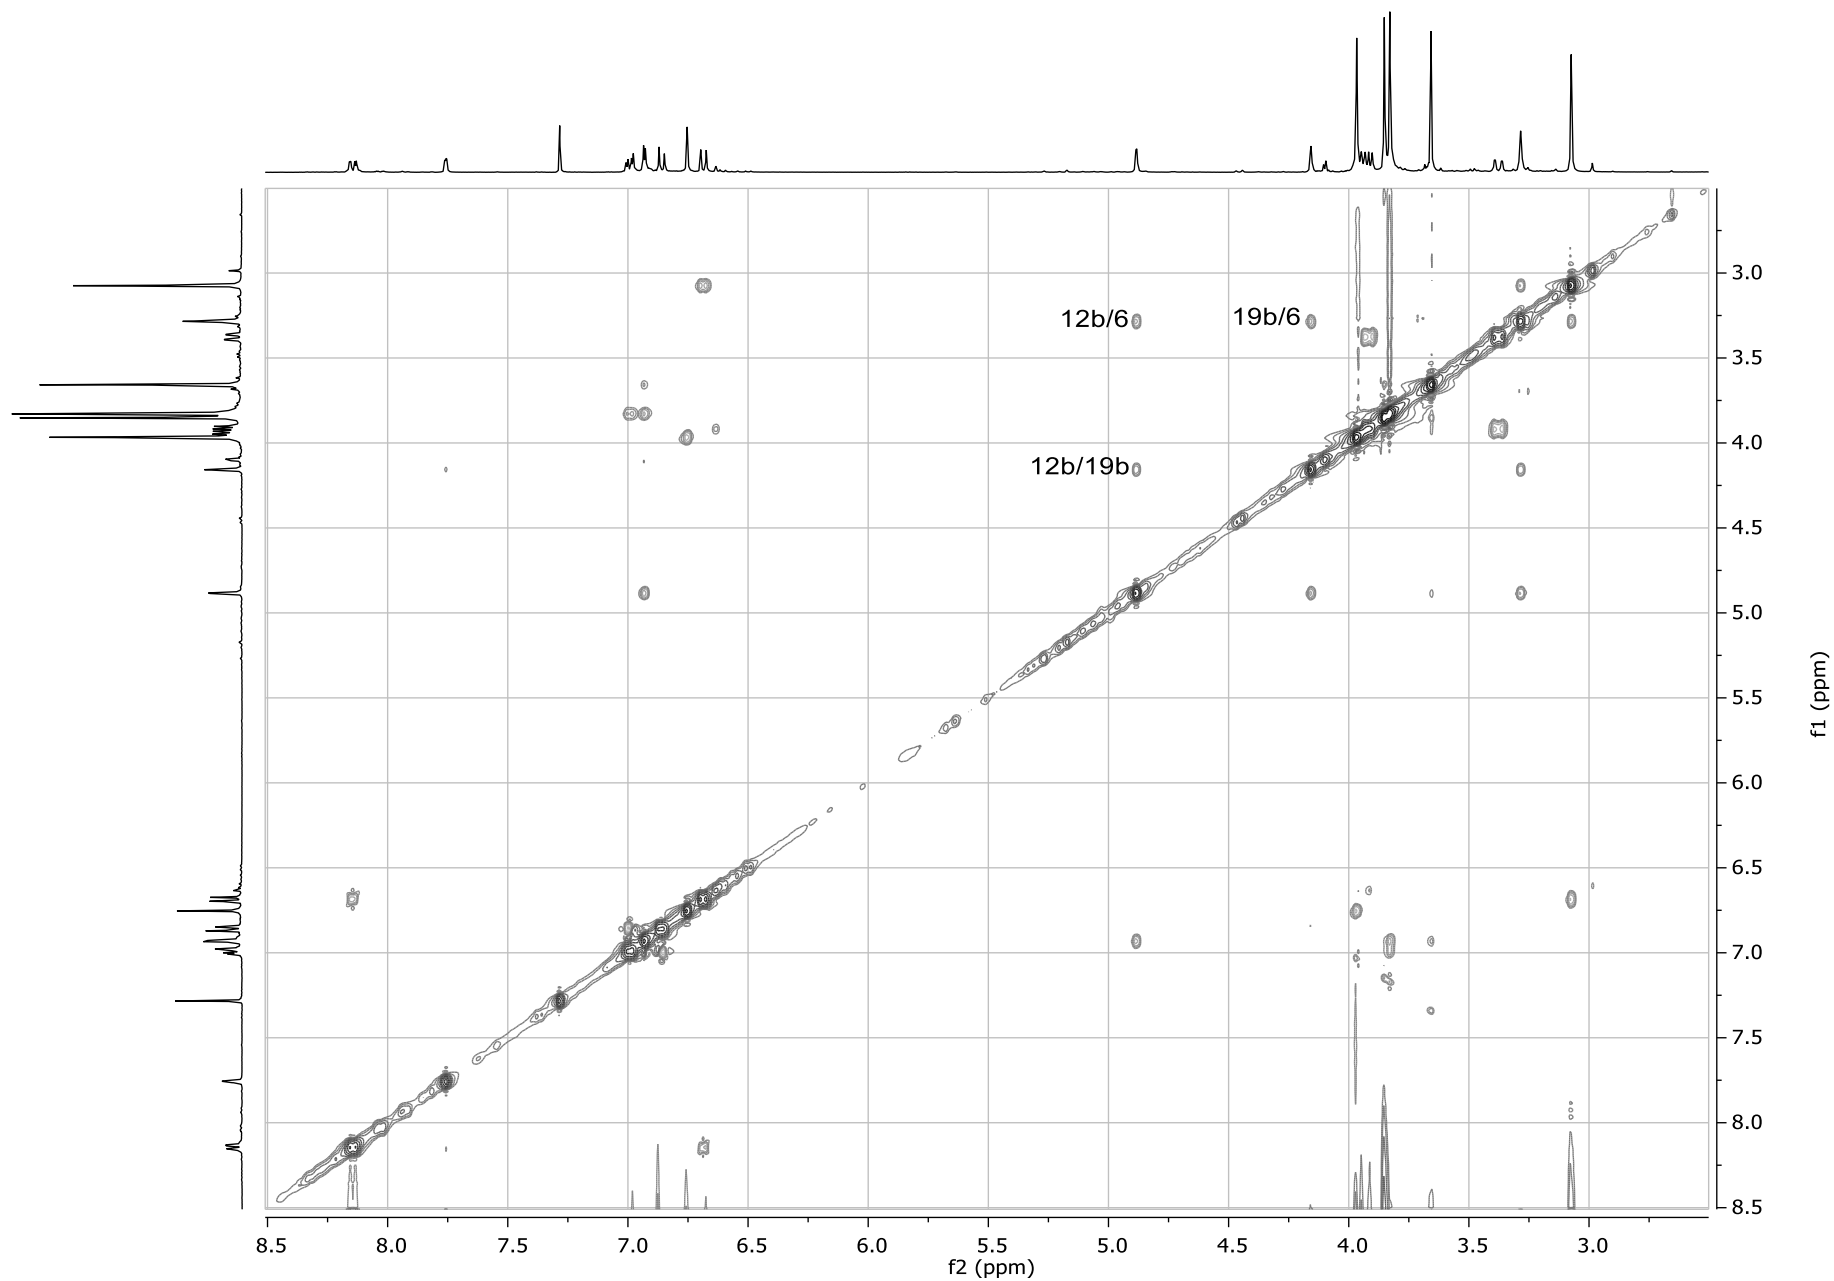

Figure S62. NOESY spectrum of *rac*-(6a*S*<sup>\*</sup>,12b*R*<sup>\*</sup>,19b*R*<sup>\*</sup>)-**5ac** in CDCl<sub>3</sub> at 400 MHz.





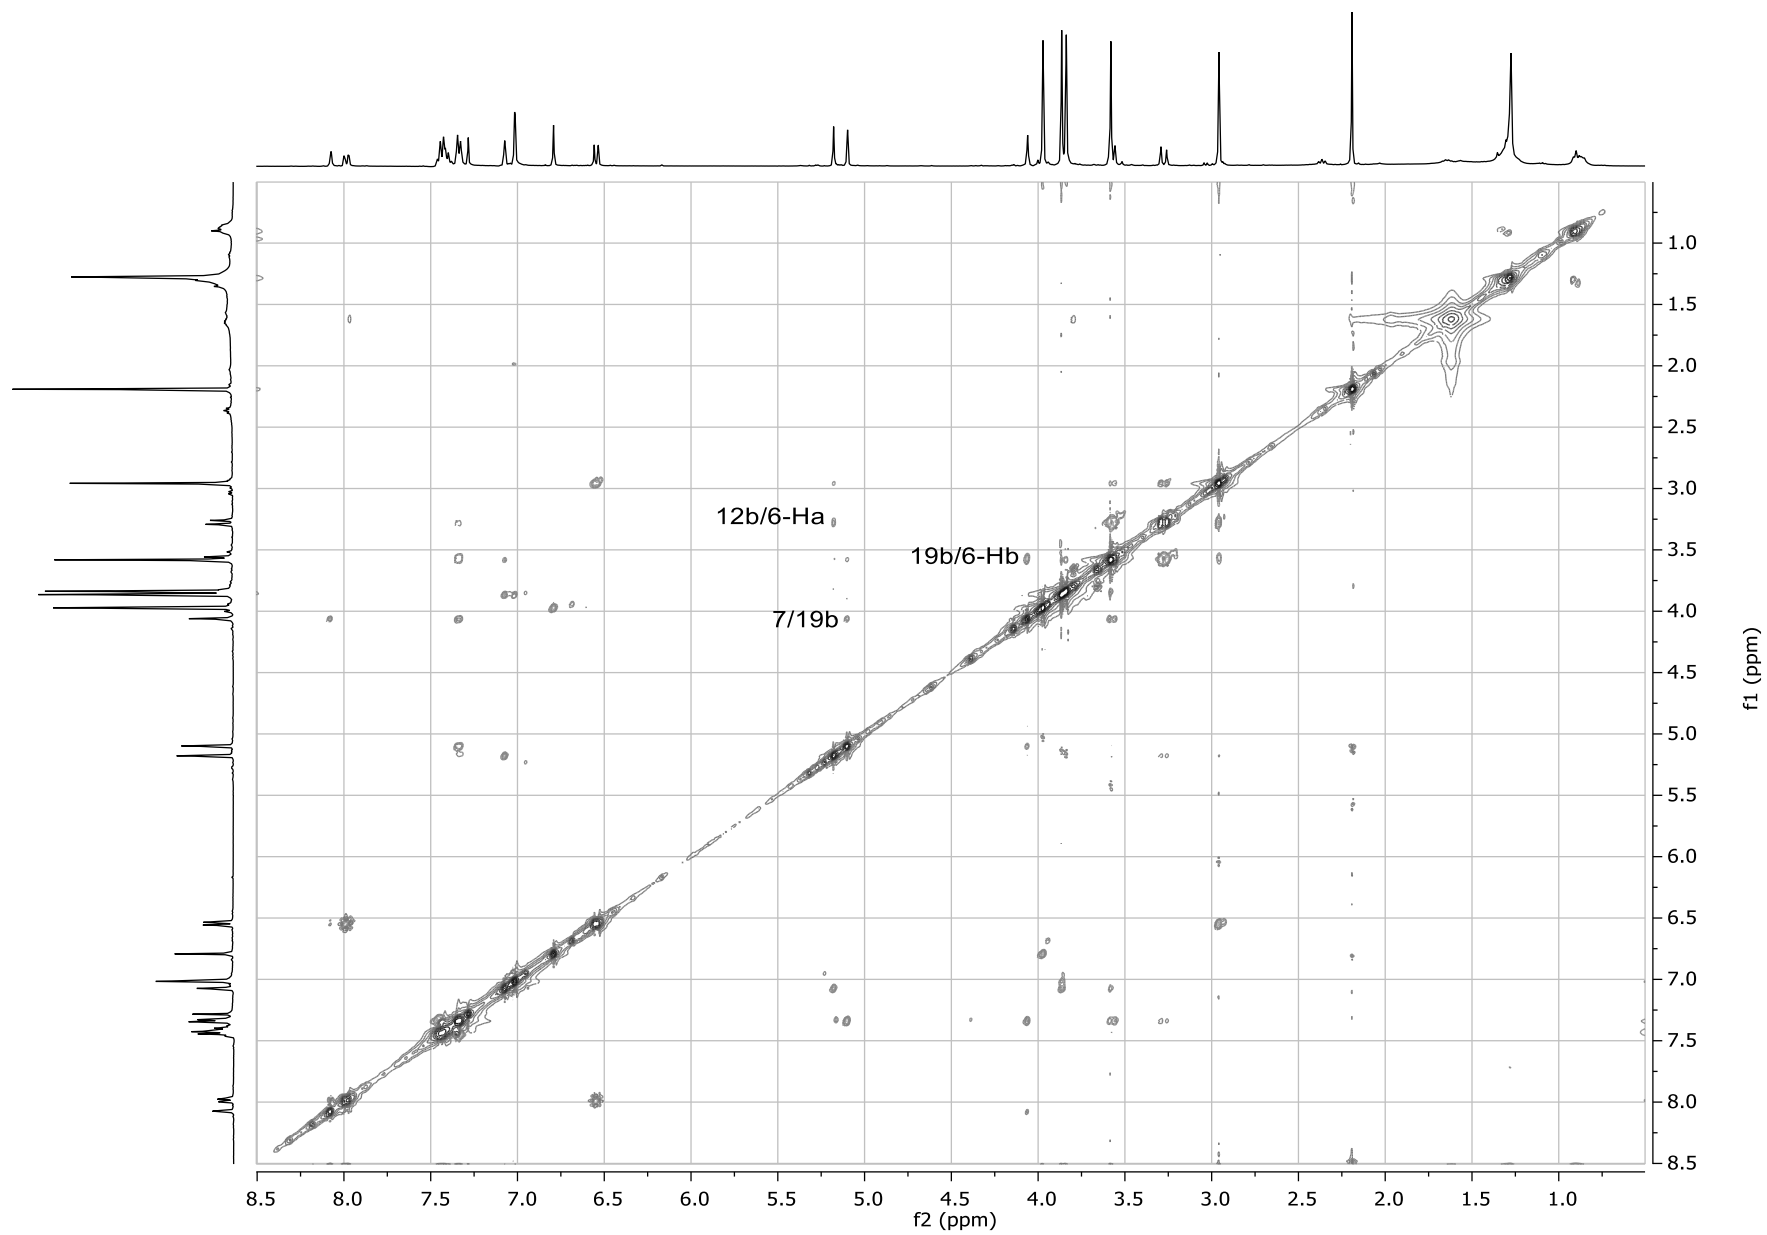

Figure S65. NOESY spectrum of (6a*S*,7*R*,12b*R*,19b*S*)-**4bc** in CDCl<sub>3</sub> at 400 MHz.

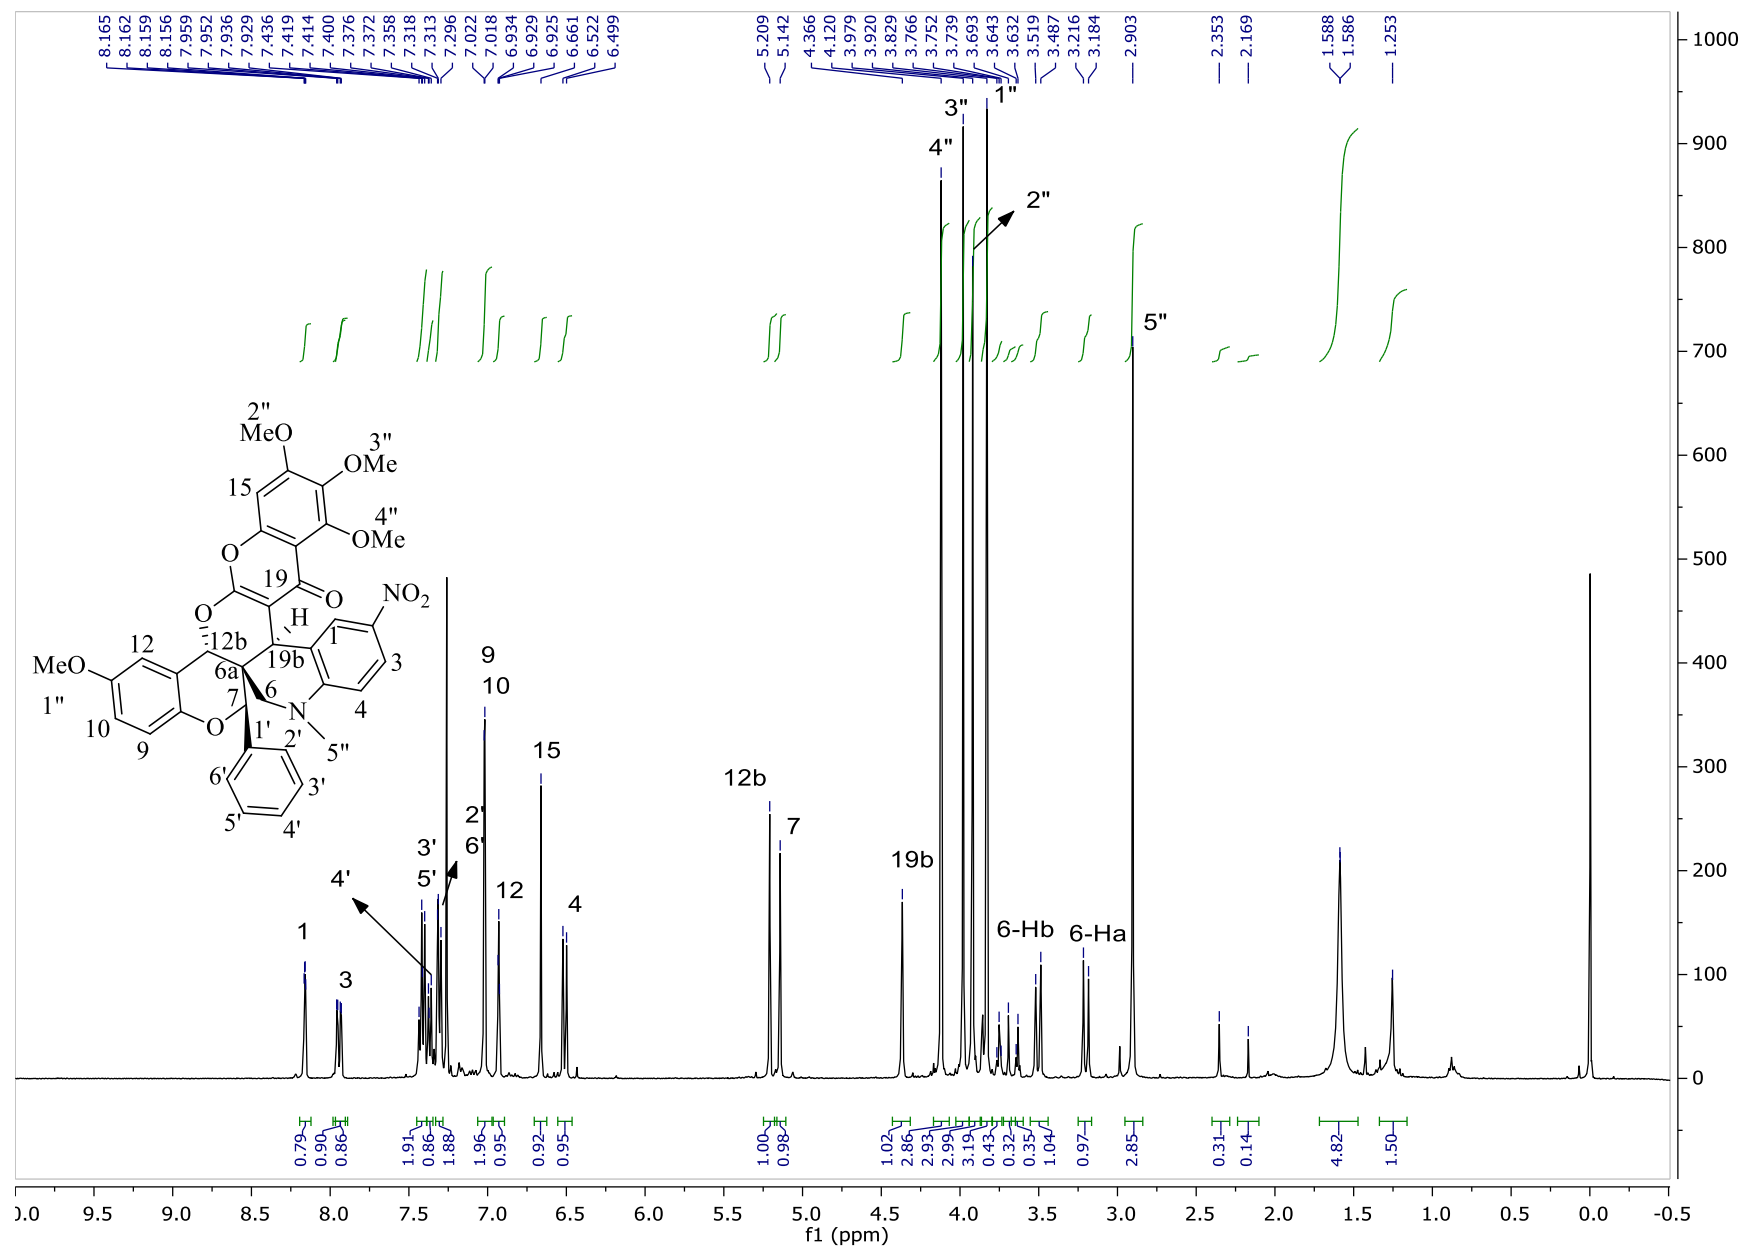

Figure S66.  $^1\text{H-NMR}$  spectrum of  $(6aS,7R,12bR,19bS)\text{-6bc}$  in  $\text{CDCl}_3$  at 400 MHz.



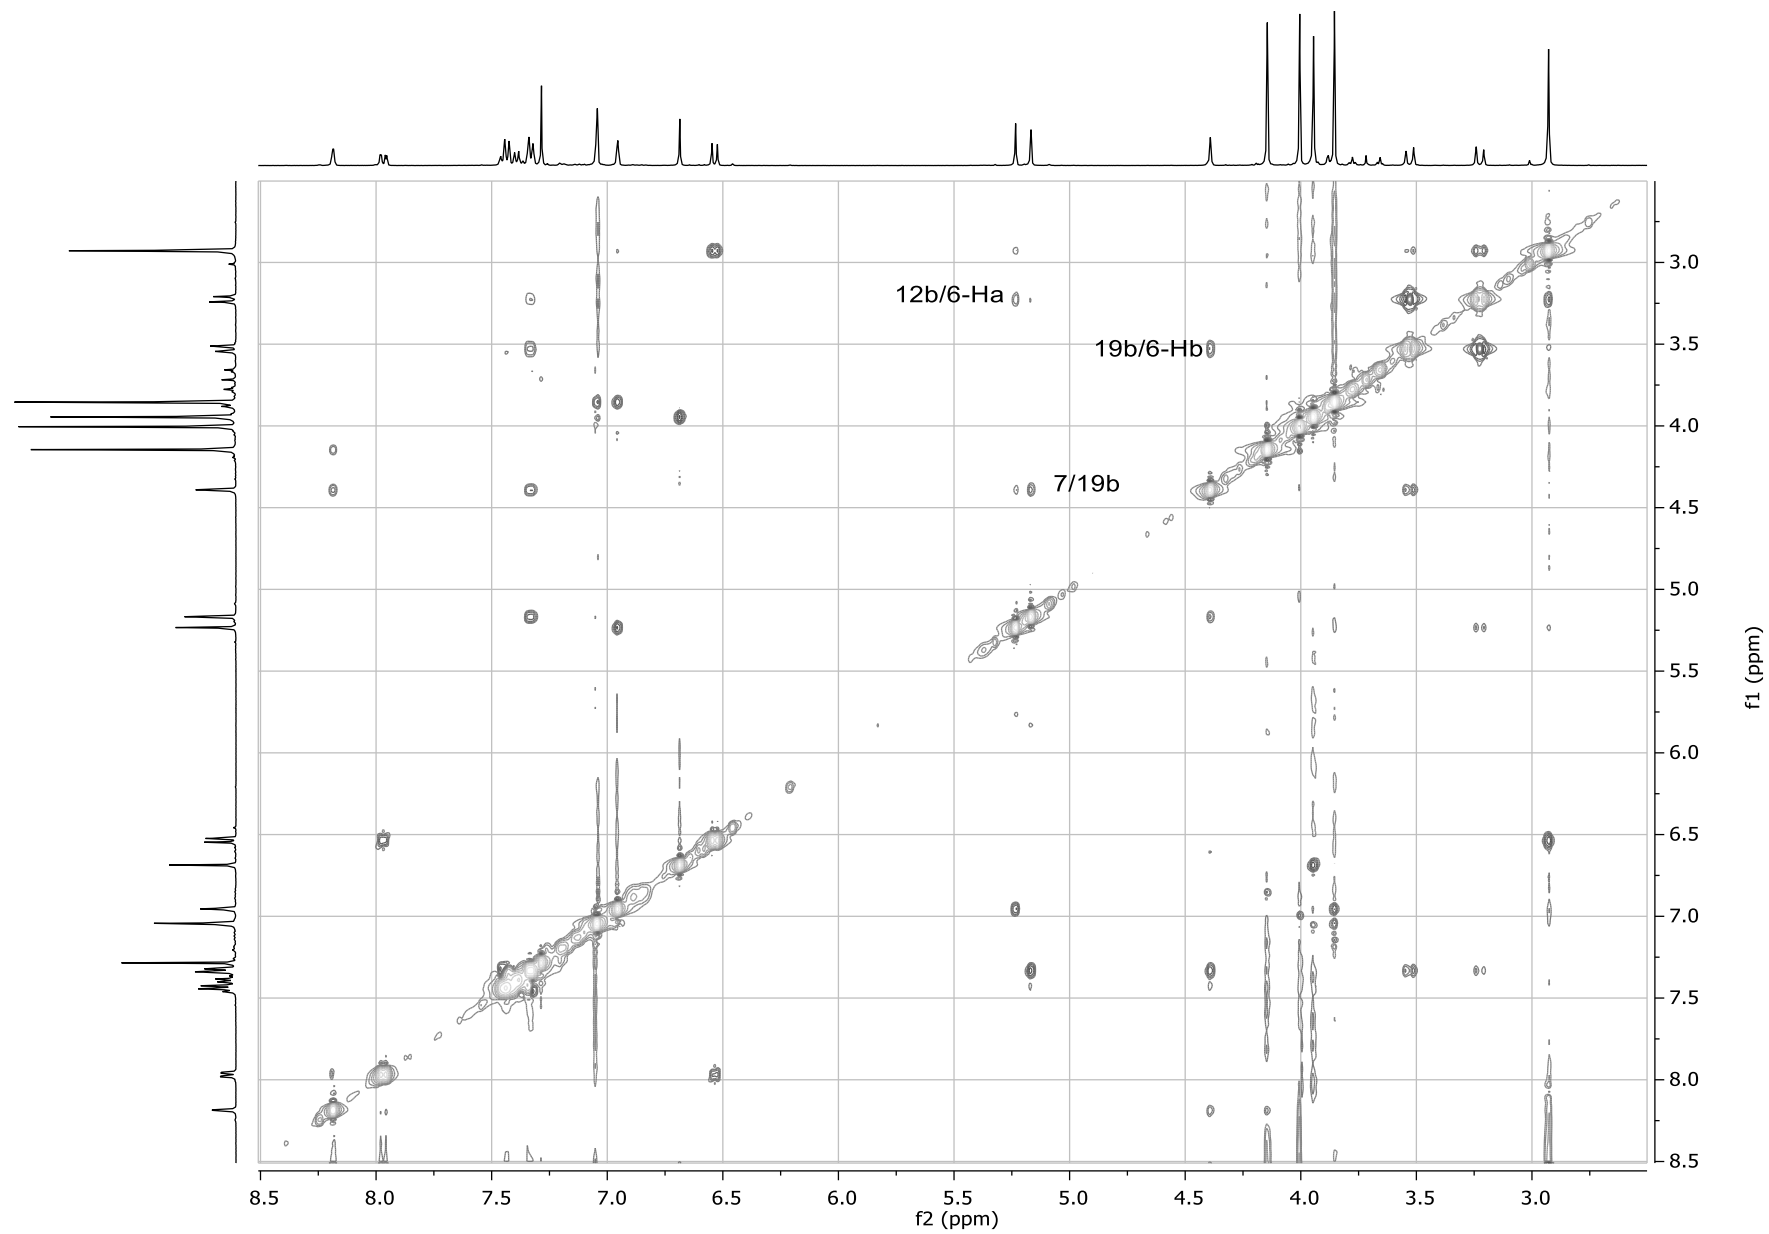

Figure S68. NOESY spectrum of (6a*S*,7*R*,12b*R*,19b*S*)-**6bc** in CDCl<sub>3</sub> at 400 MHz.

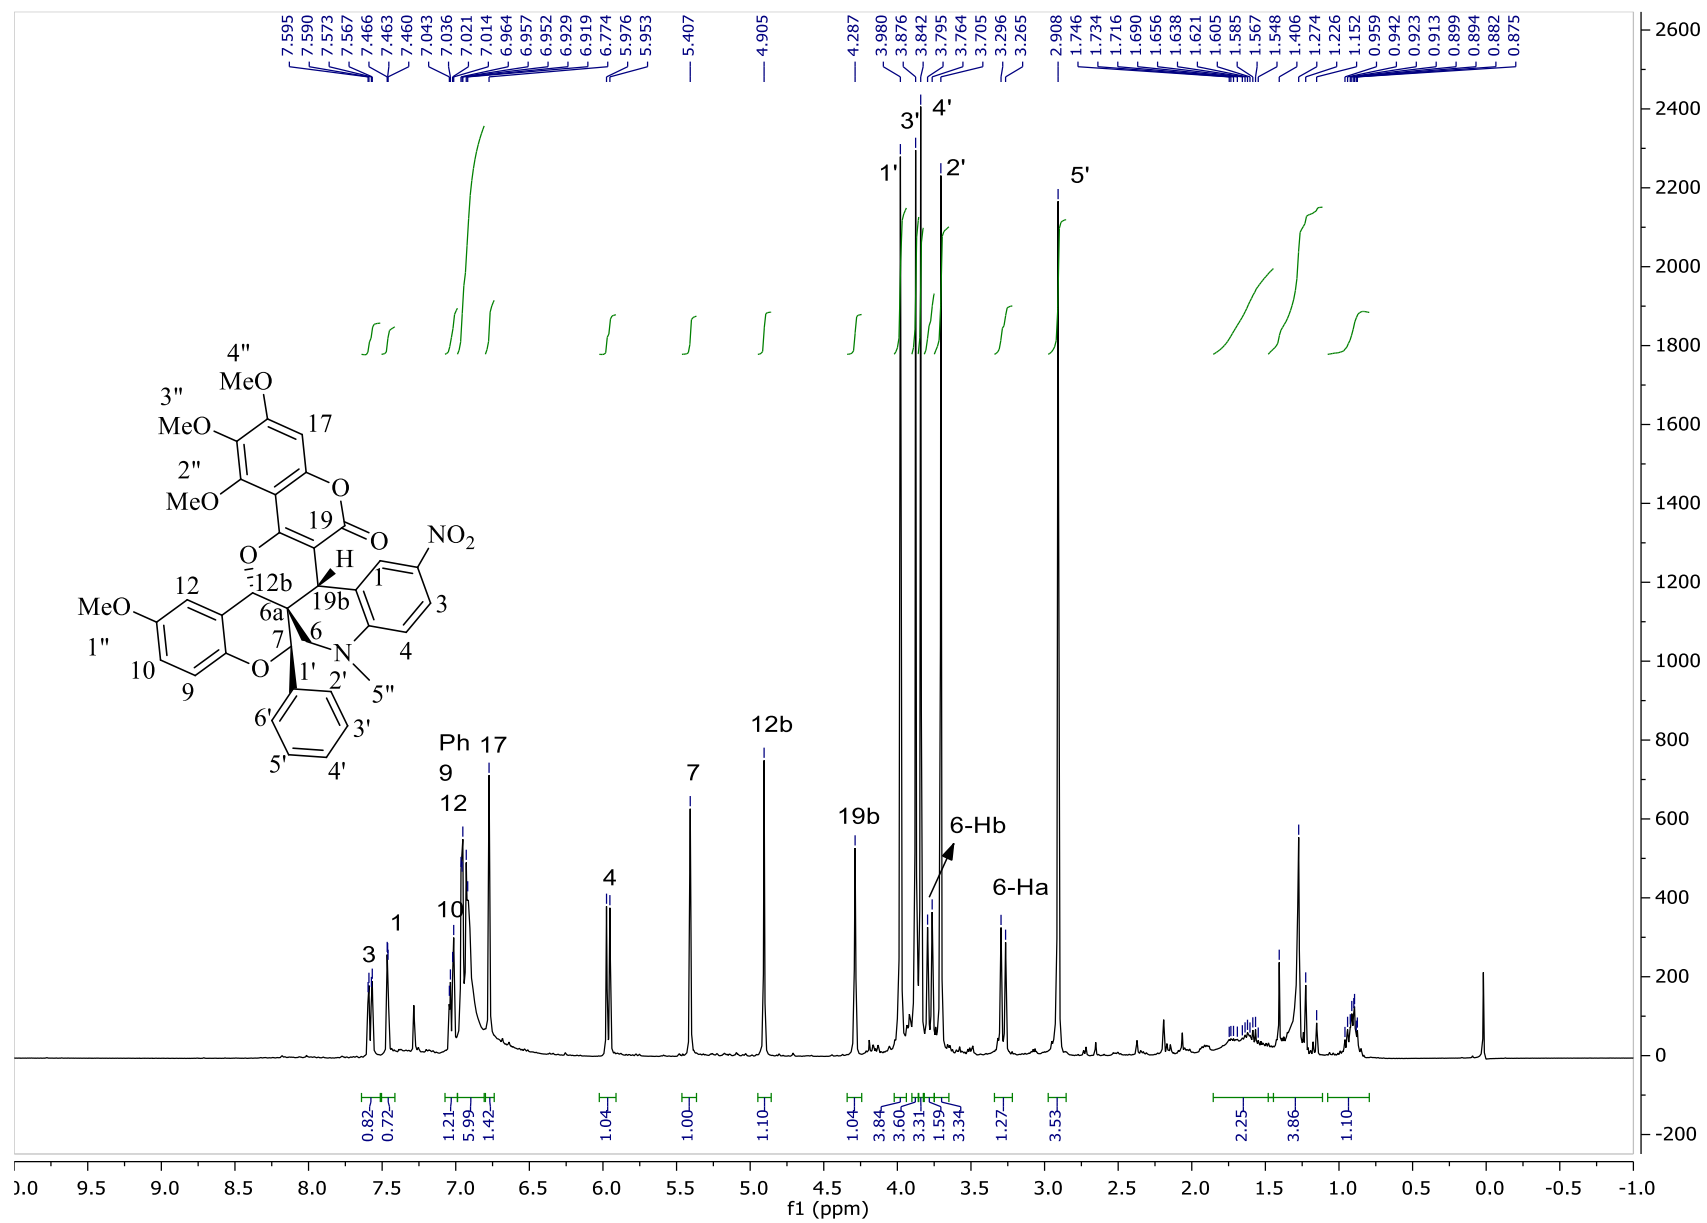

Figure S69.  $^1\text{H-NMR}$  spectrum of (6aS,7R,12bR,19bR)-5bc in  $\text{CDCl}_3$  at 400 MHz.

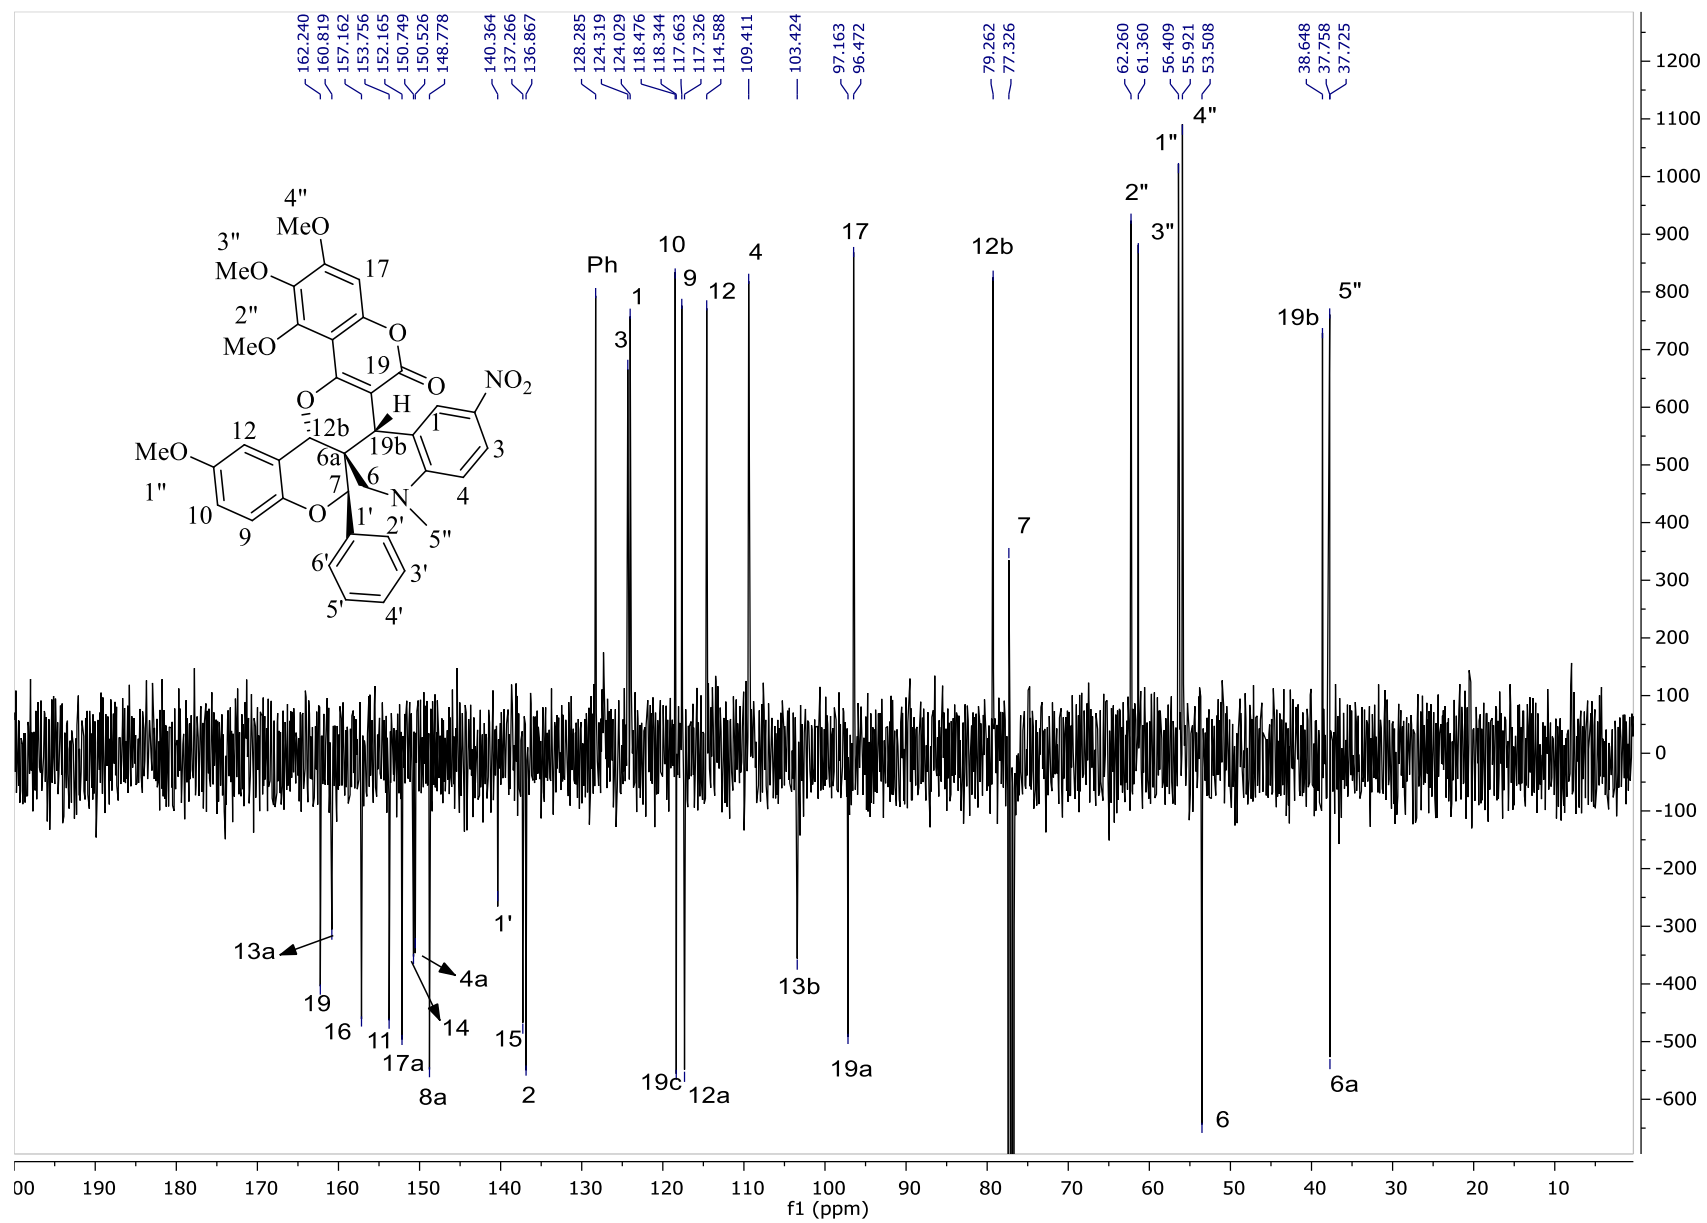

Figure S70. <sup>13</sup>C-NMR spectrum of (6aS,7R,12bR,19bR)-5bc in CDCl<sub>3</sub> at 100 MHz.

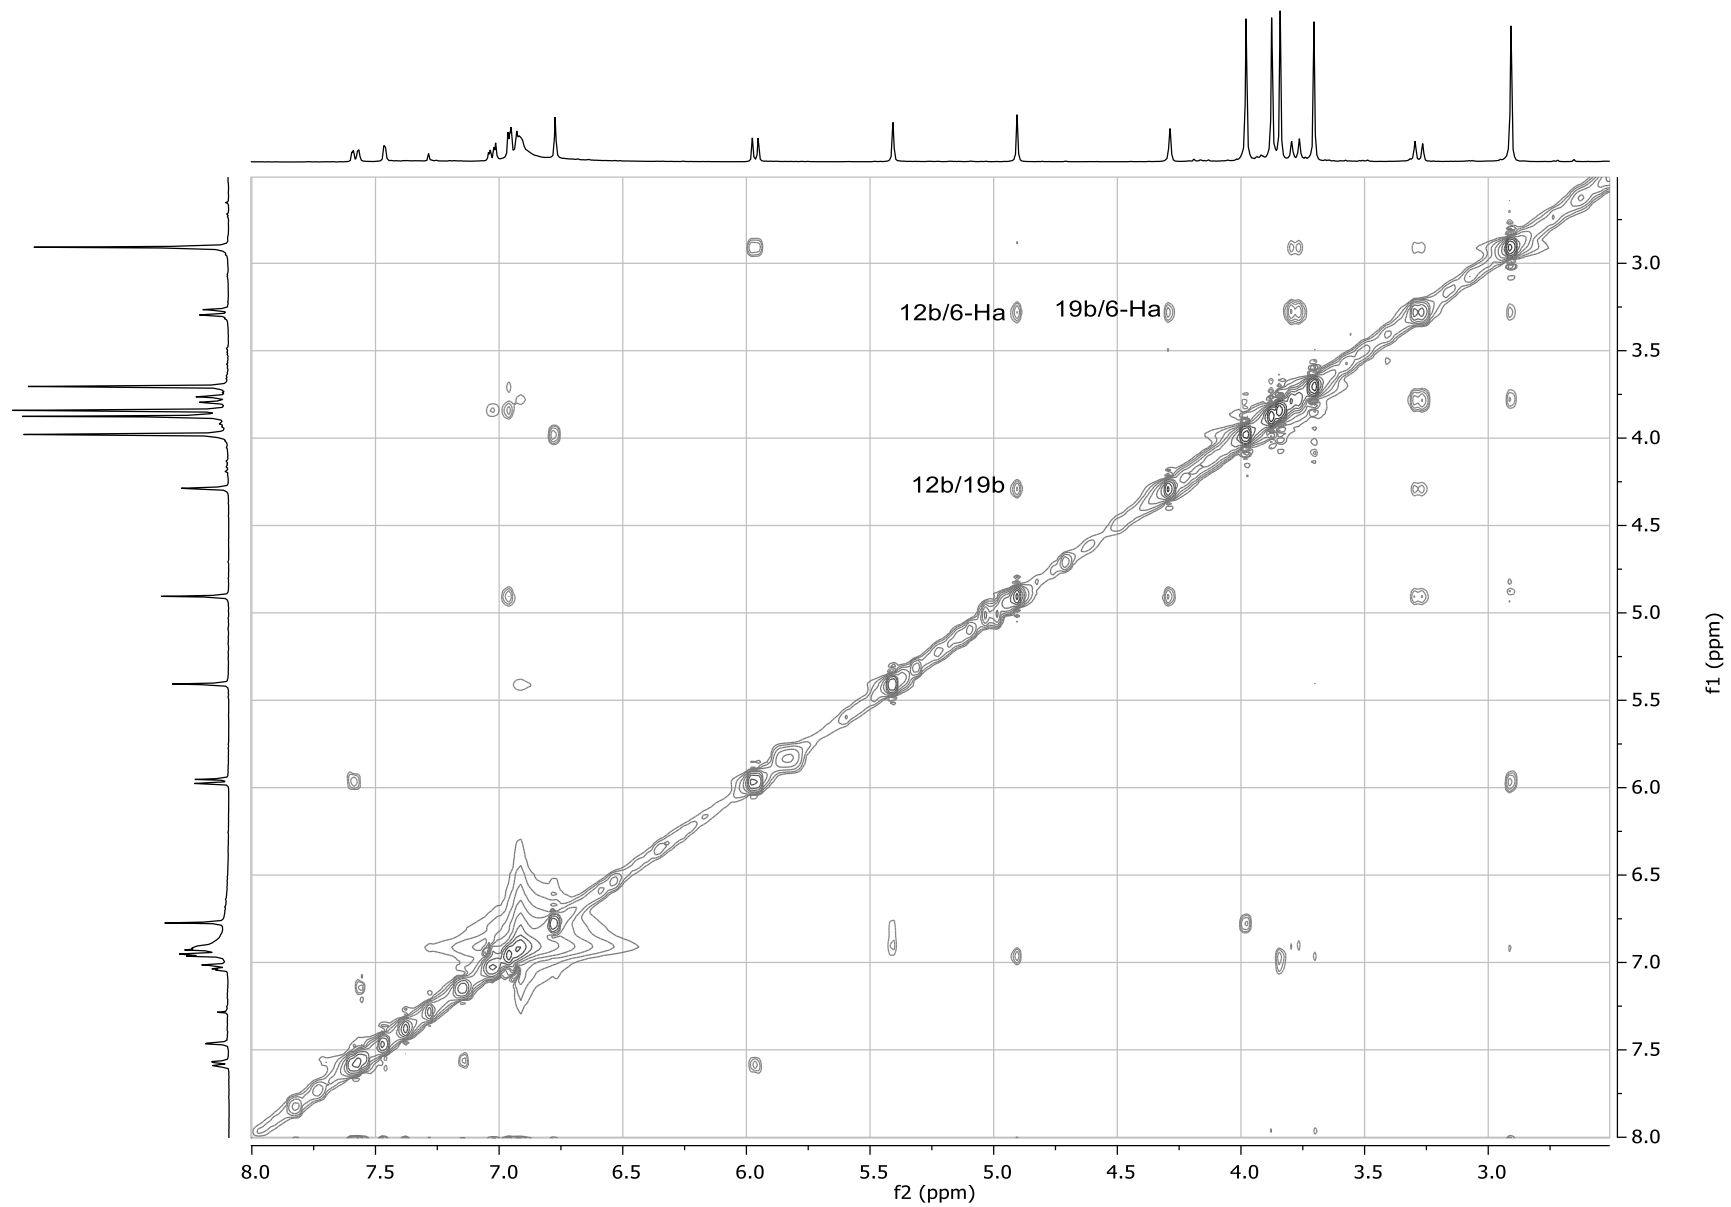

Figure S71. NOESY spectrum of (6a*S*,7*R*,12*bR*,19*bR*)-**5bc** in CDCl<sub>3</sub> at 400 MHz.

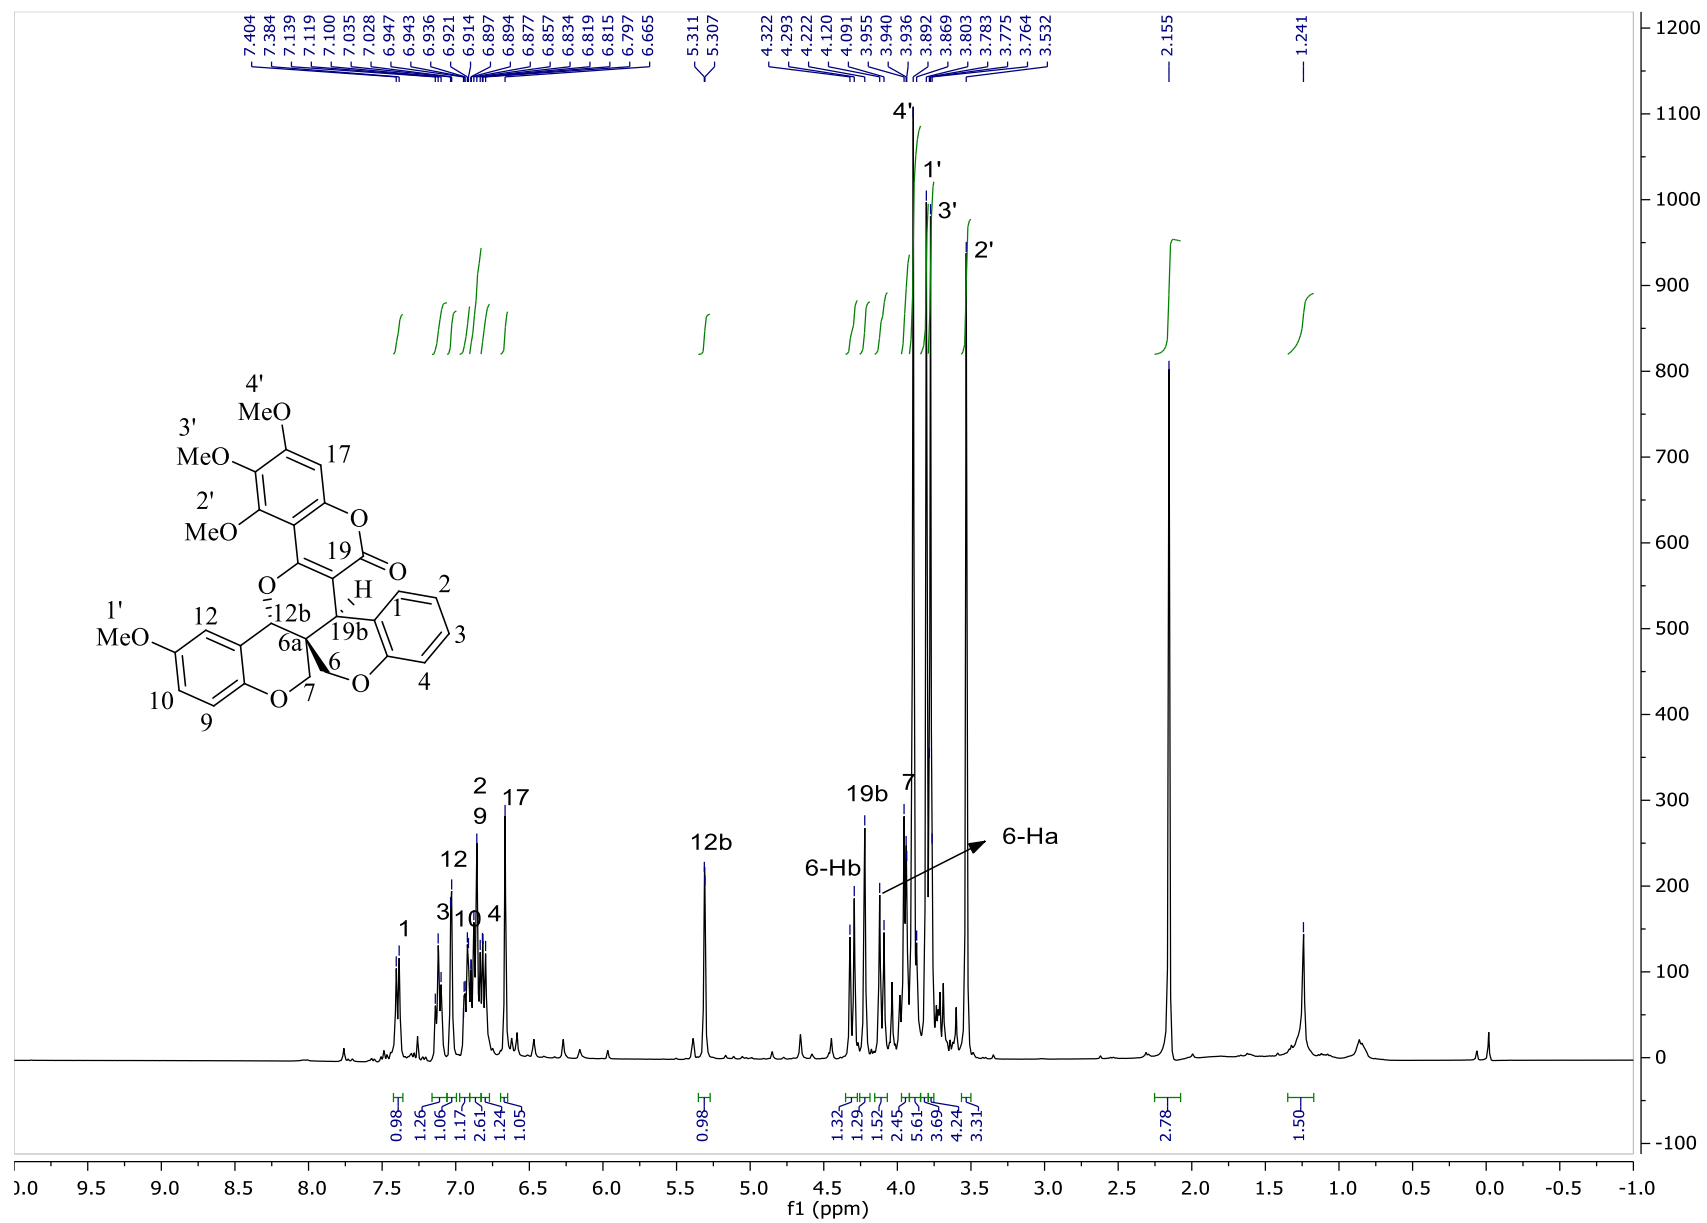

Figure S72. <sup>1</sup>H-NMR spectrum of *rac*-(6a*S*\*,12b*R*\*,19b*R*\*)-4cc in CDCl<sub>3</sub> at 400 MHz.

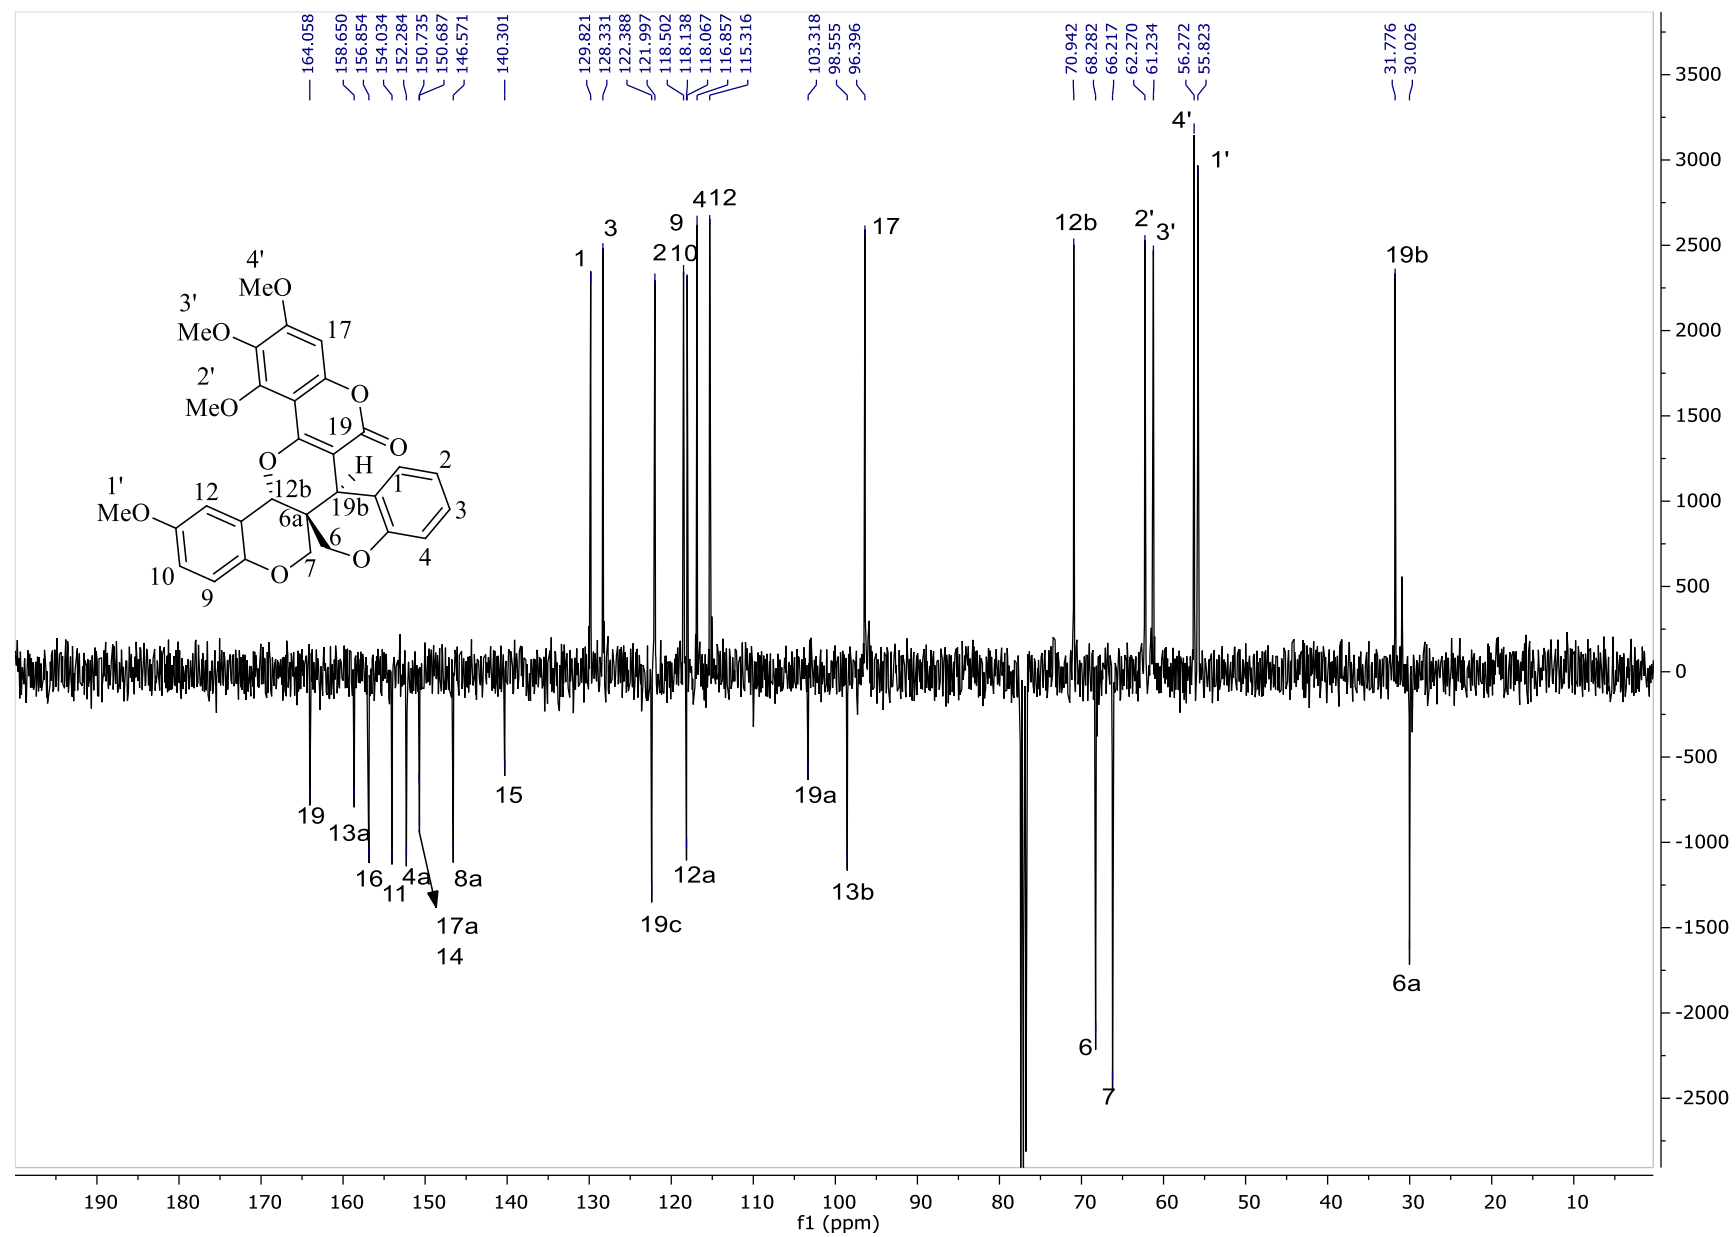

Figure S73.  $^{13}\text{C}$ -NMR spectrum of *rac*-(6a*S*\*,12b*R*\*,19b*R*\*)-4cc in  $\text{CDCl}_3$  at 100 MHz.

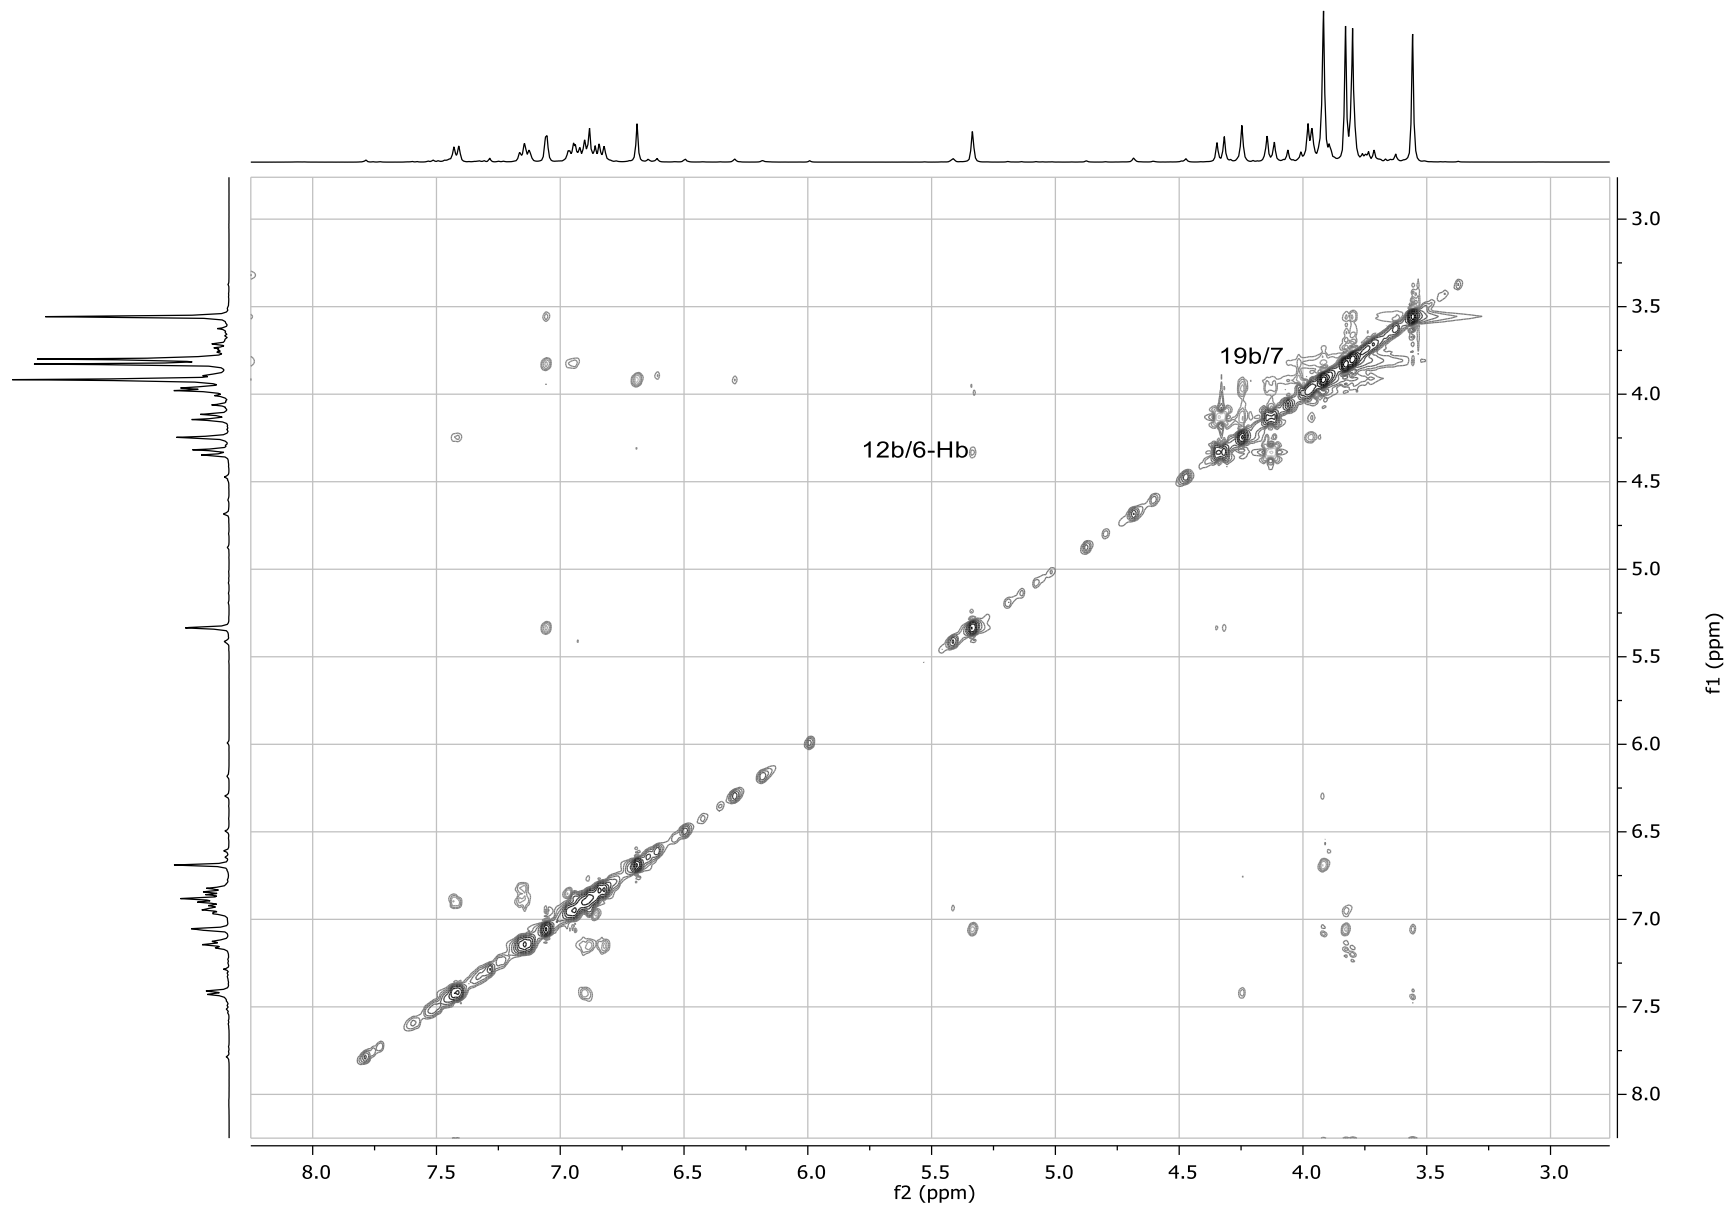

Figure S74. NOESY spectrum of *rac*-(6a*S*\*,12b*R*\*,19b*R*\*)-**4cc** in CDCl<sub>3</sub> at 400 MHz.



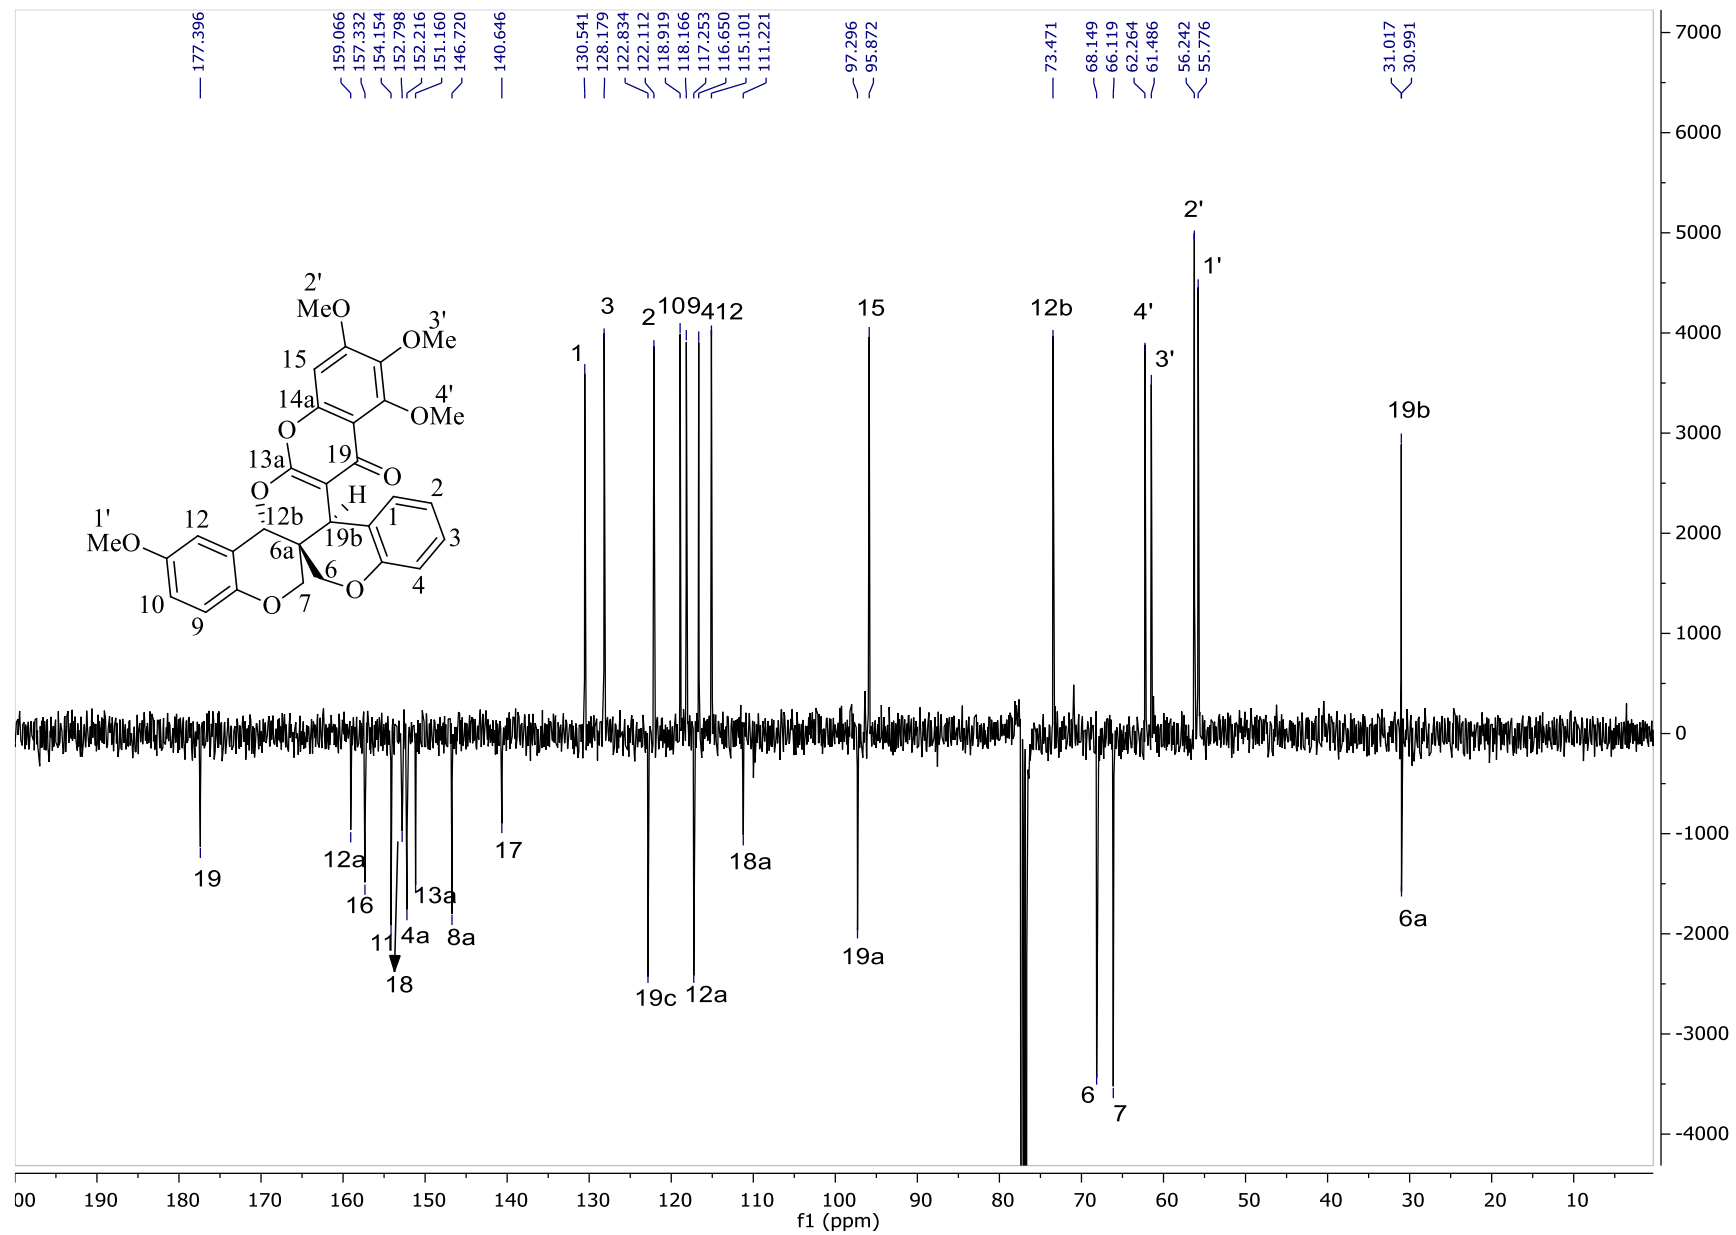

Figure S76. <sup>13</sup>C-NMR spectrum of *rac*-(6a*S*\*,12b*R*\*,19b*R*\*)-6cc in CDCl<sub>3</sub> at 100 MHz.

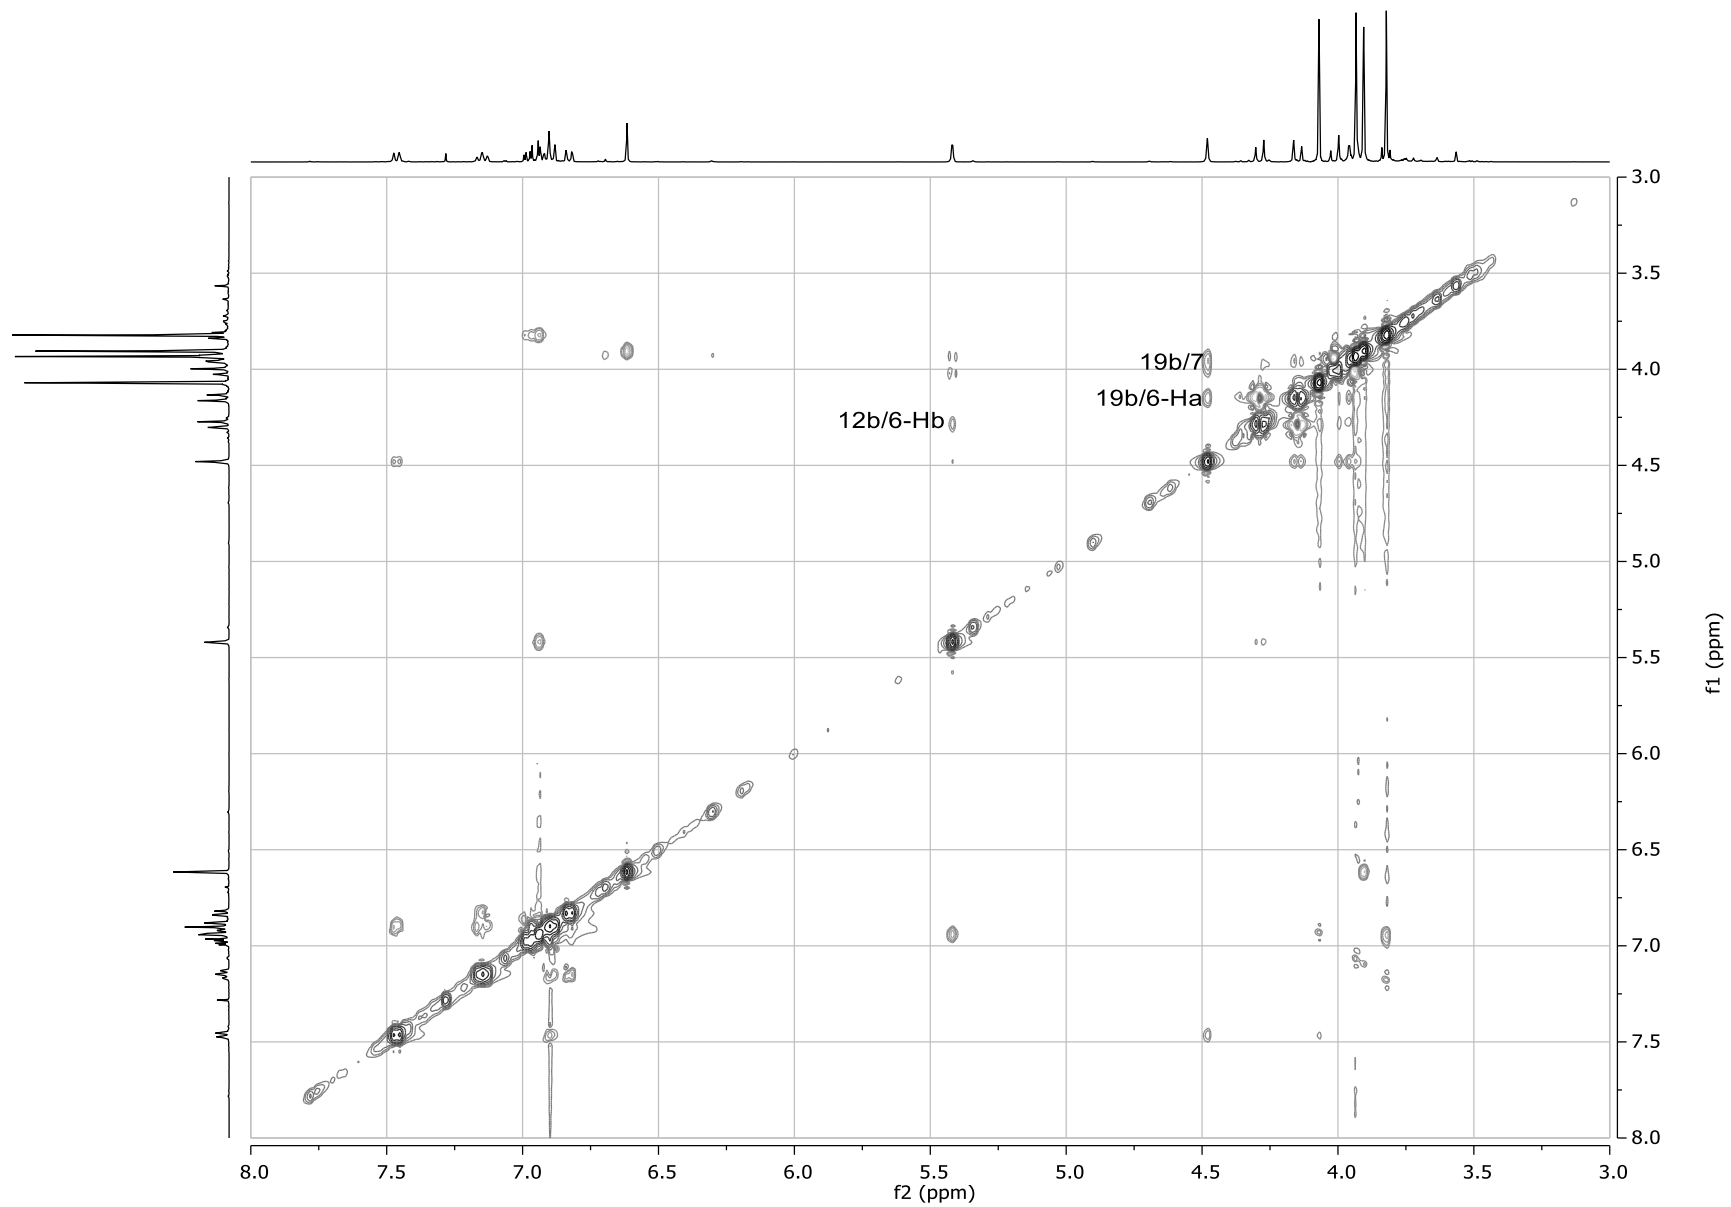

Figure S77. NOESY spectrum of *rac*-(6a*S*\*,12b*R*\*,19b*R*\*)-**6cc** in CDCl<sub>3</sub> at 400 MHz.

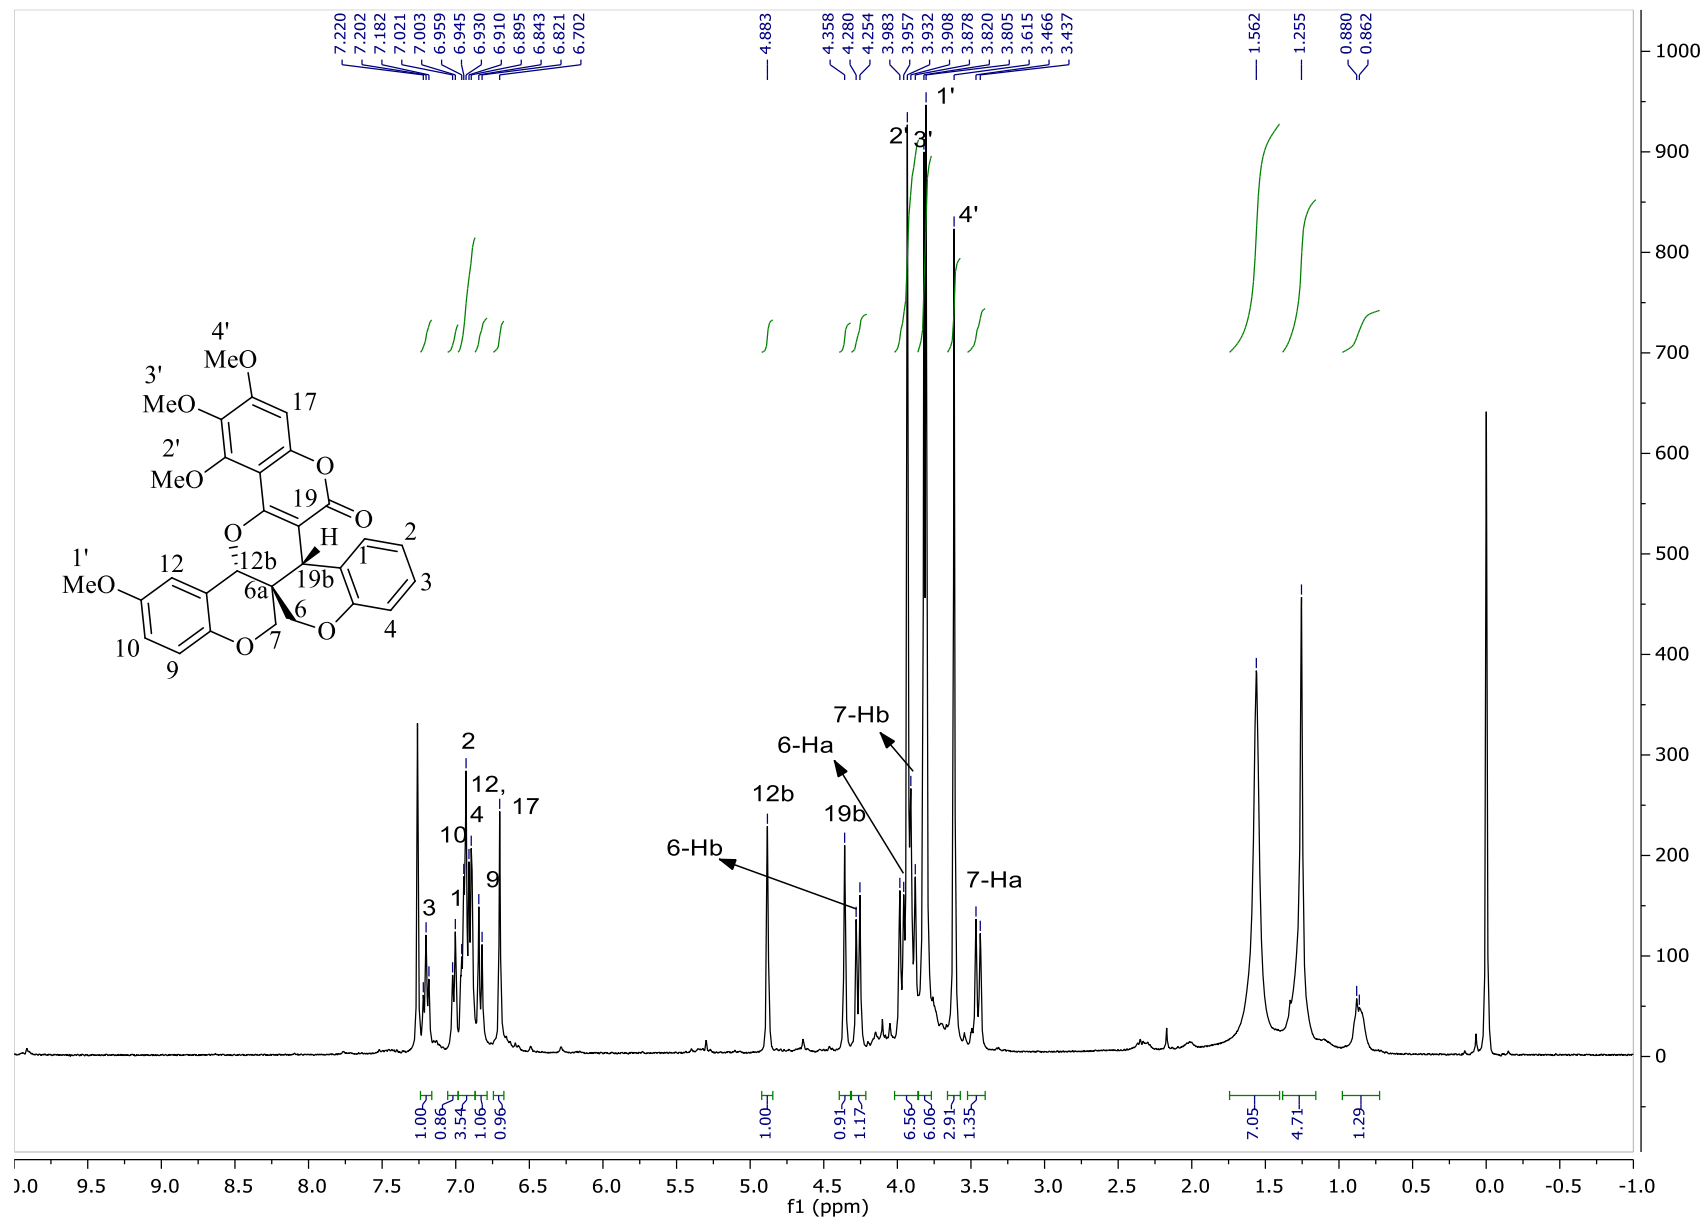

Figure S78. <sup>1</sup>H-NMR spectrum of *rac*-(6a*S*\*,12b*R*\*,19b*S*\*)-5cc in CDCl<sub>3</sub> at 400 MHz.

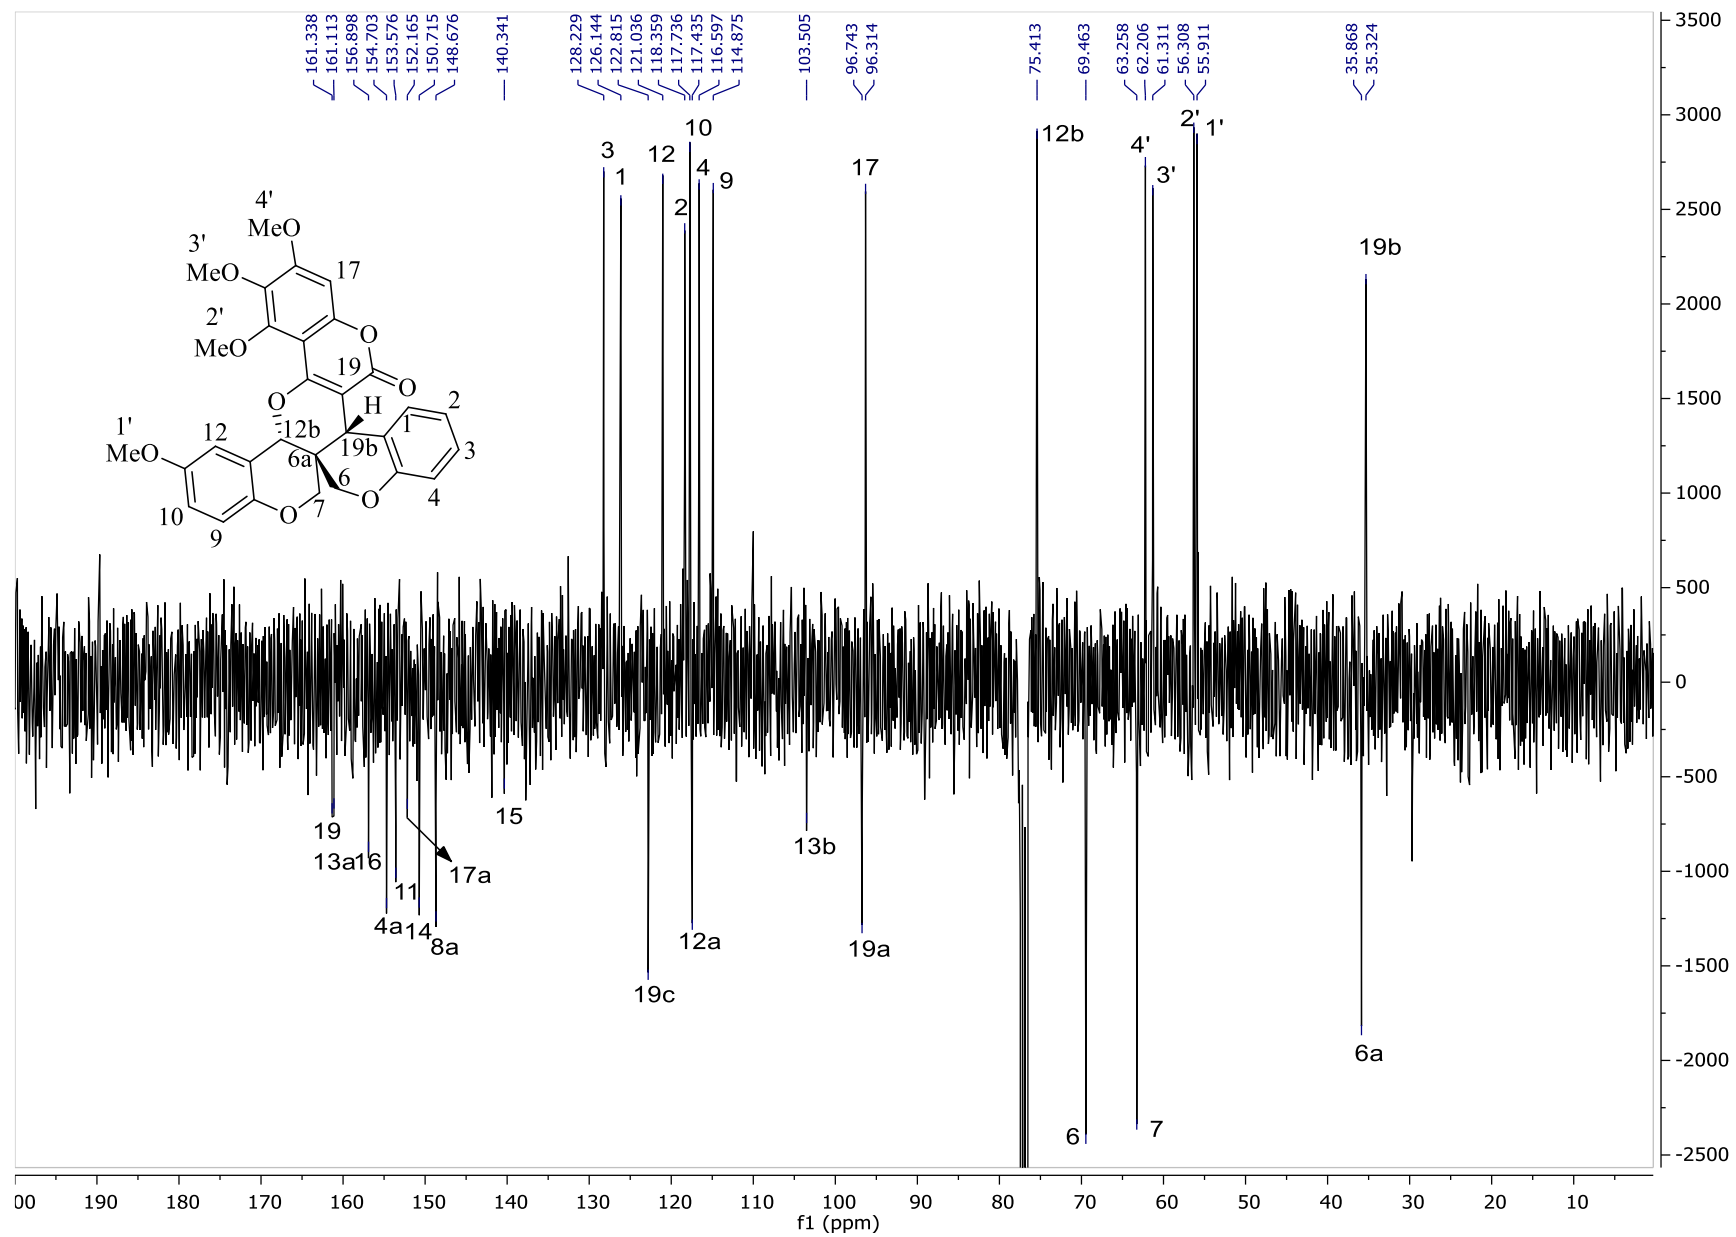

Figure S79.  $^{13}\text{C}$ -NMR spectrum of *rac*-(6a*S*<sup>\*</sup>,12b*R*<sup>\*</sup>,19b*S*<sup>\*</sup>)-5cc in  $\text{CDCl}_3$  at 100 MHz.

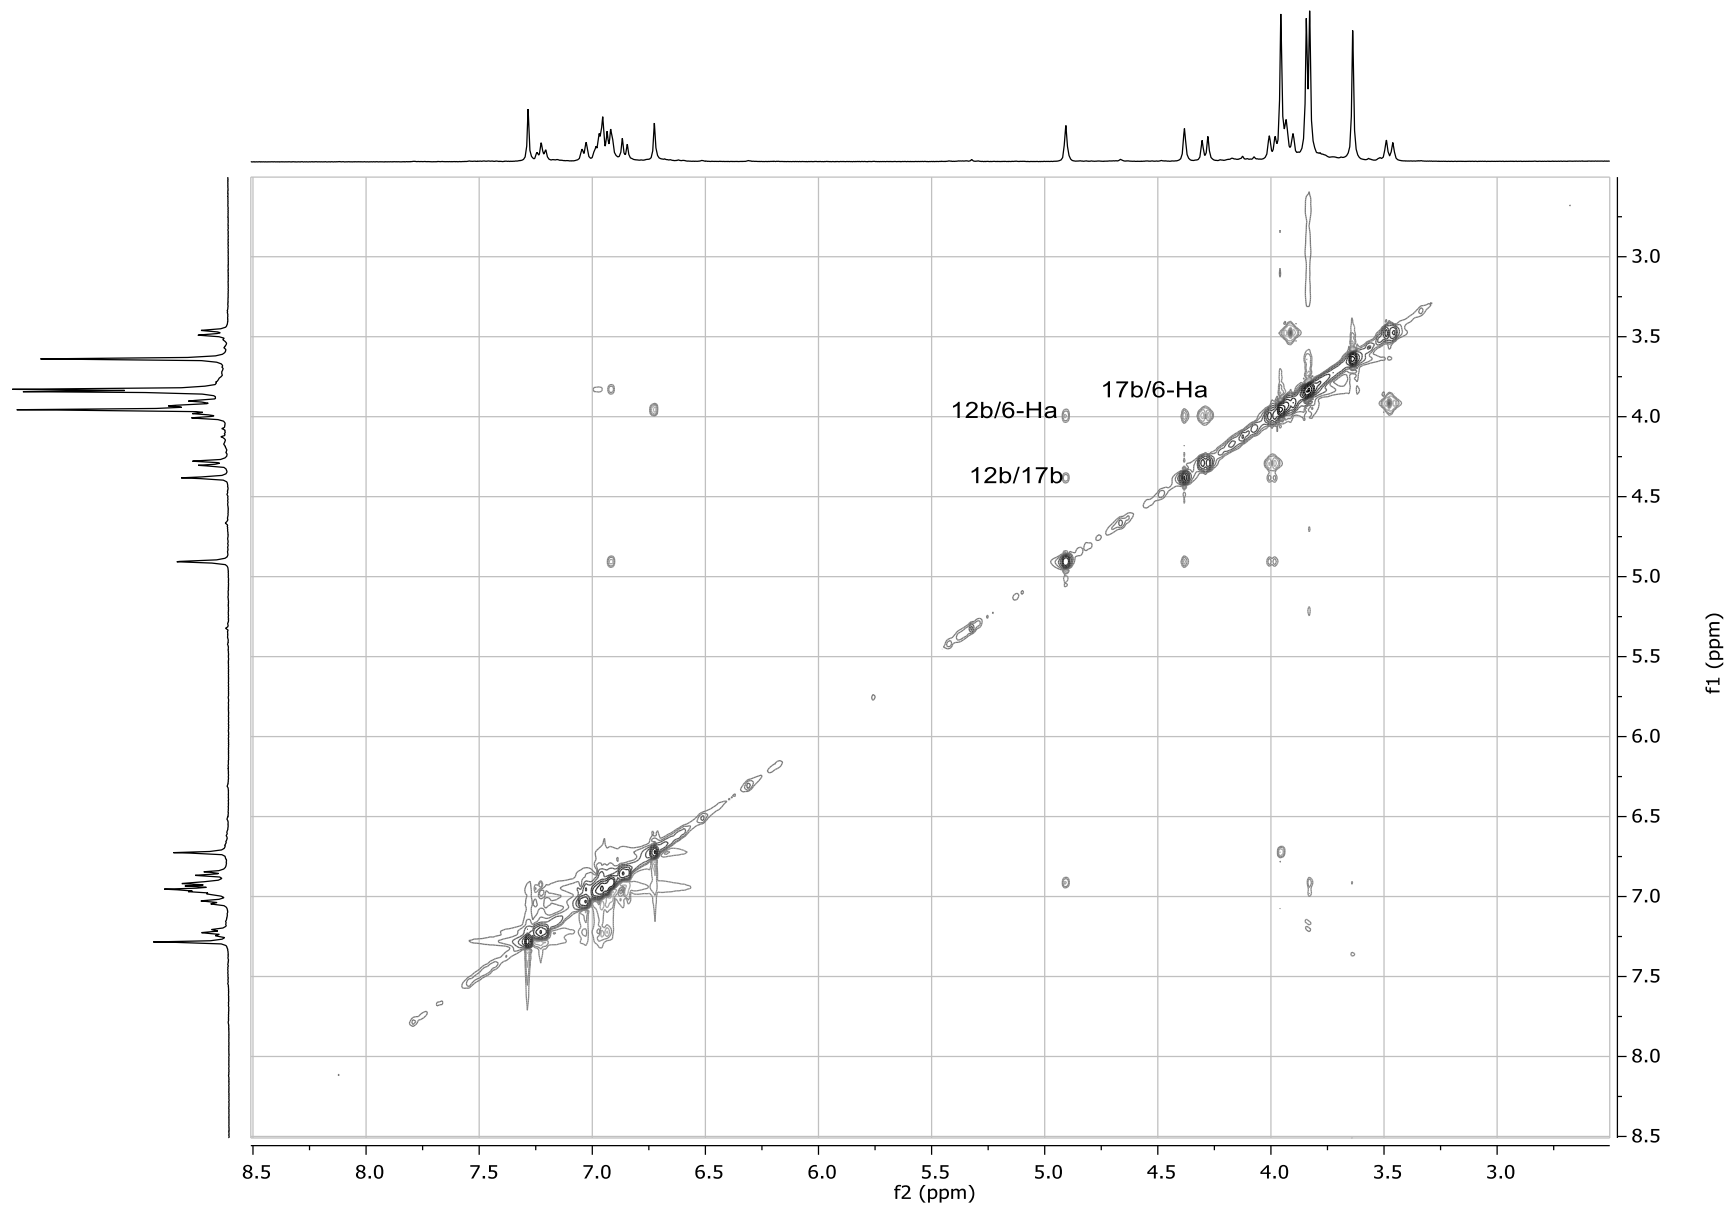

Figure S80. NOESY spectrum of *rac*-(6a*S*\*,12b*R*\*,19b*S*\*)-5cc in CDCl<sub>3</sub> at 400 MHz.

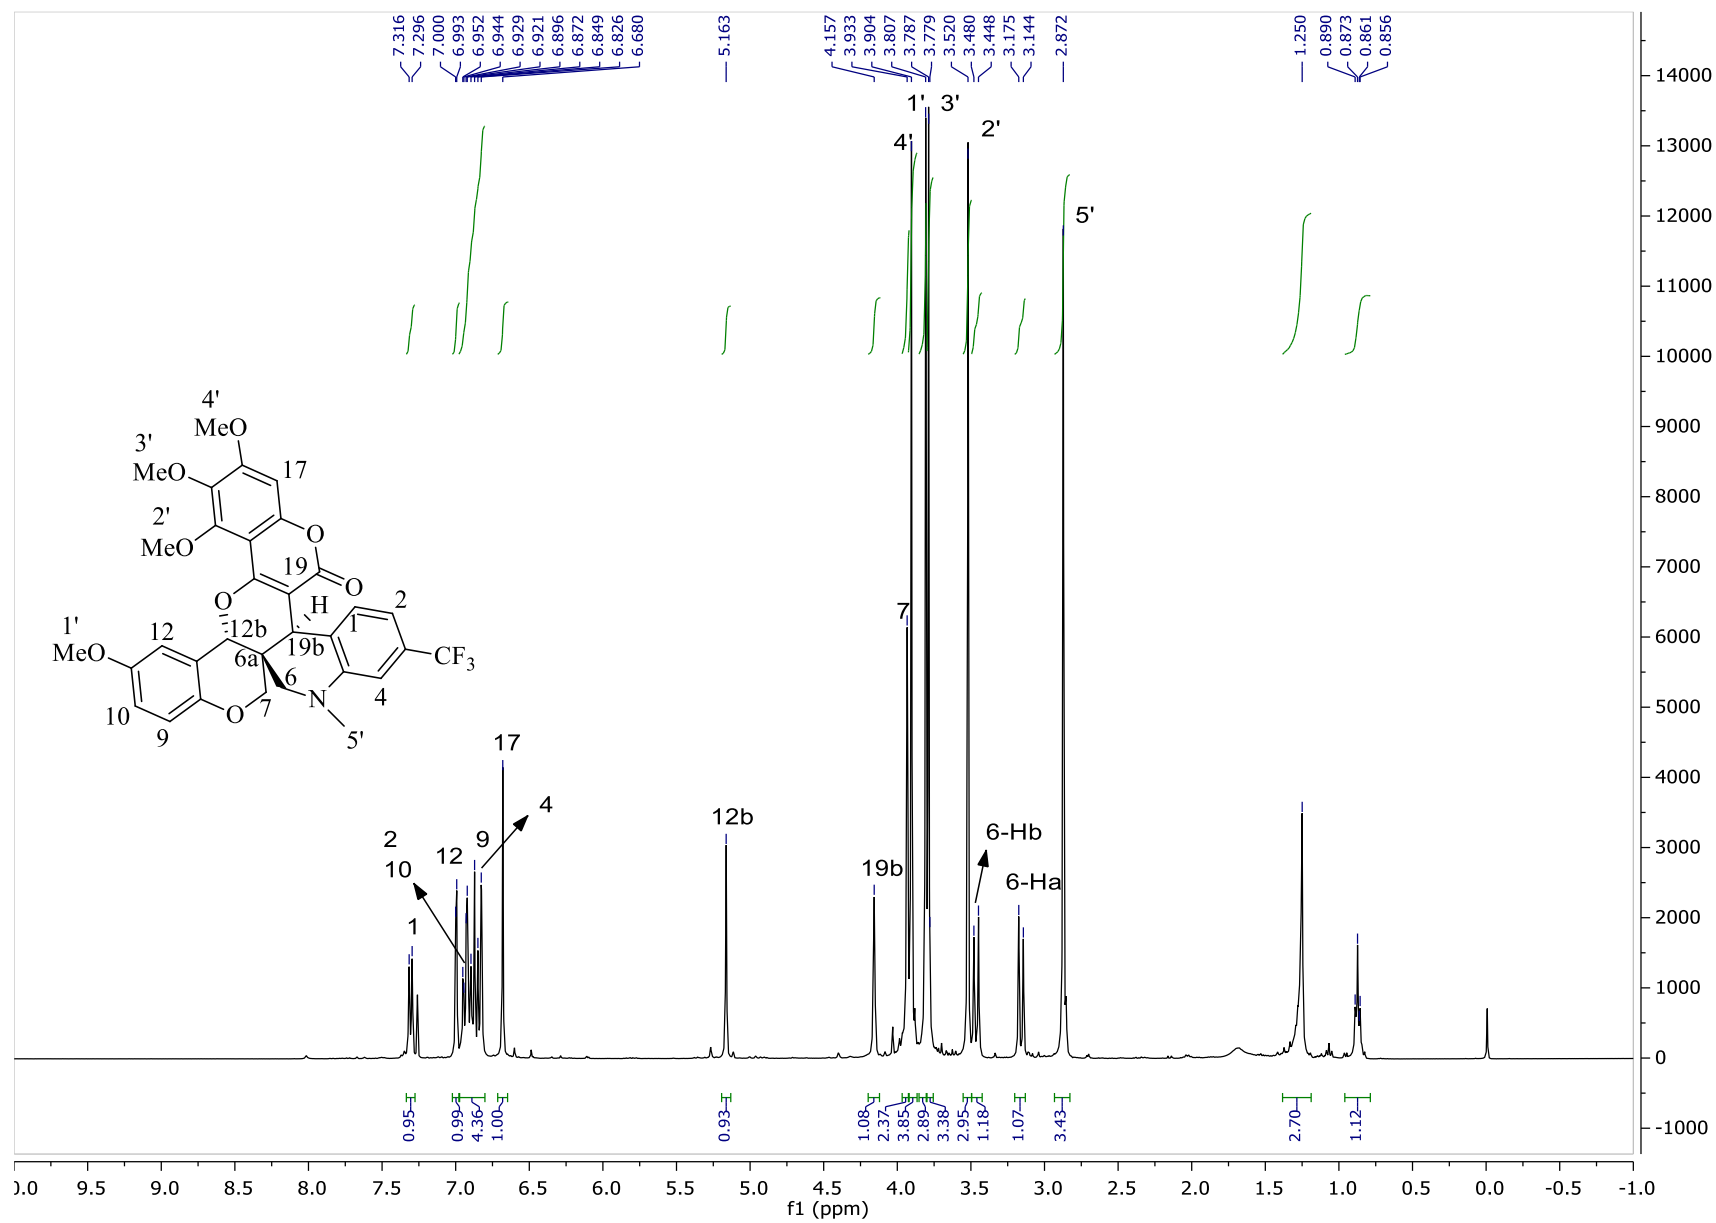

Figure S81. <sup>1</sup>H-NMR spectrum of *rac*-(6a*S*\*,12b*R*\*,19b*S*\*)-4dc in CDCl<sub>3</sub> at 400 MHz.

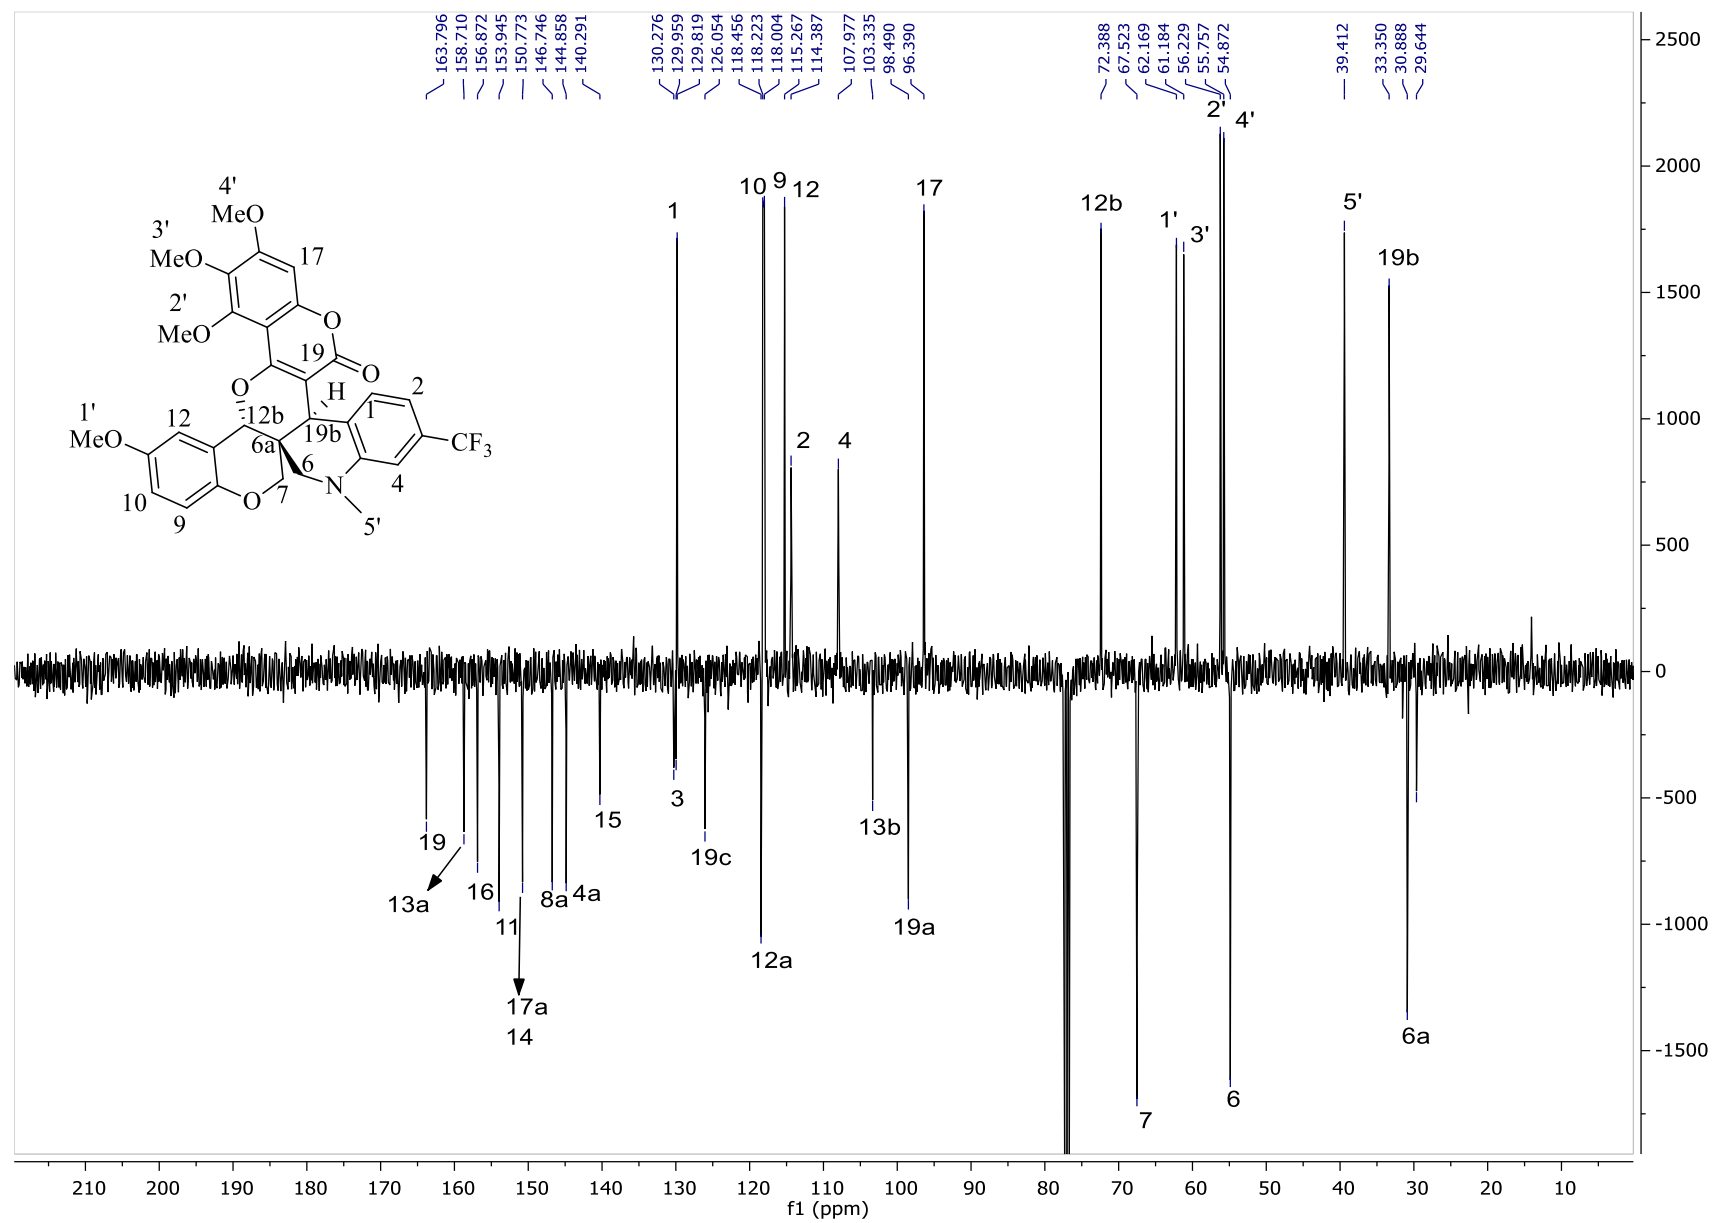

Figure S82.  $^{13}\text{C}$ -NMR spectrum of *rac*-(6a*S*\*,12b*R*\*,19b*S*\*)-4dc in  $\text{CDCl}_3$  at 100 MHz.

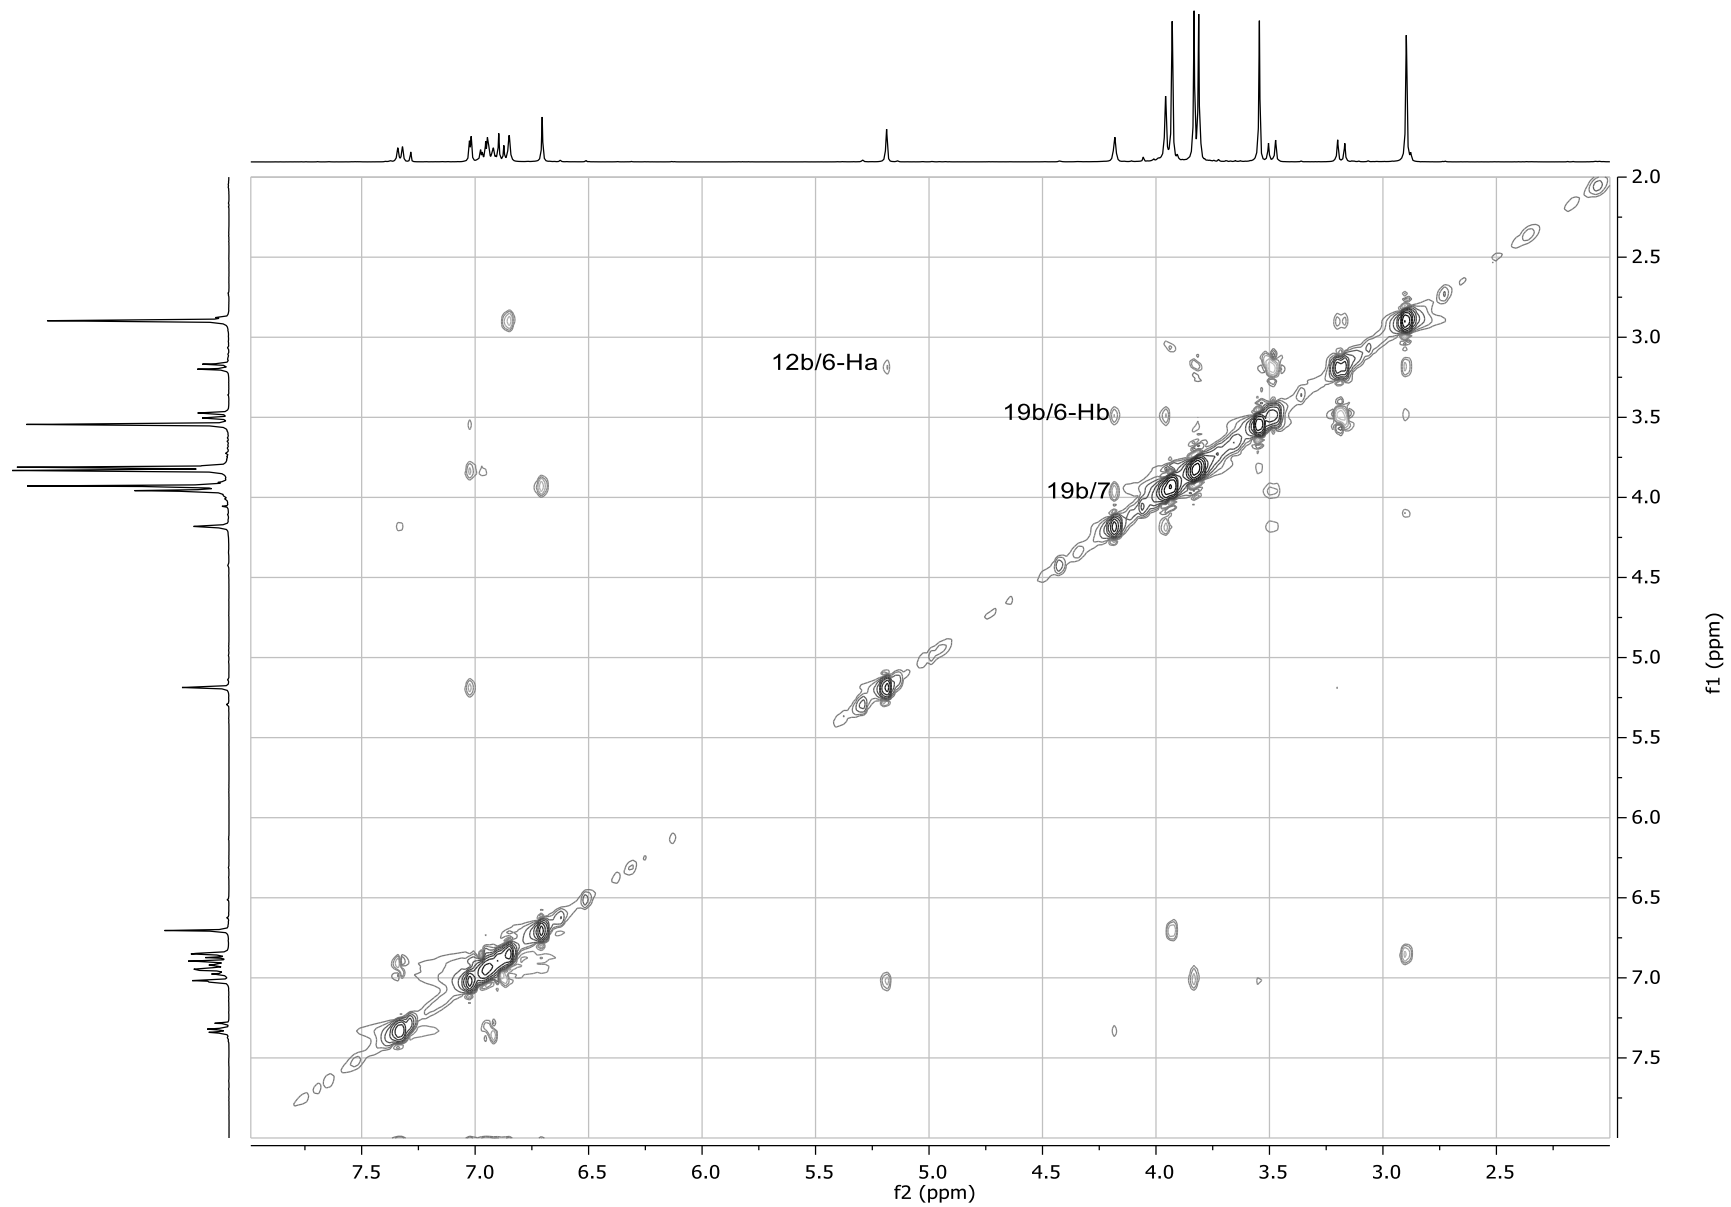

Figure S83. NOESY spectrum of *rac*-(6a*S*<sup>\*</sup>,12b*R*<sup>\*</sup>,19b*S*<sup>\*</sup>)-**4dc** in CDCl<sub>3</sub> at 400 MHz.

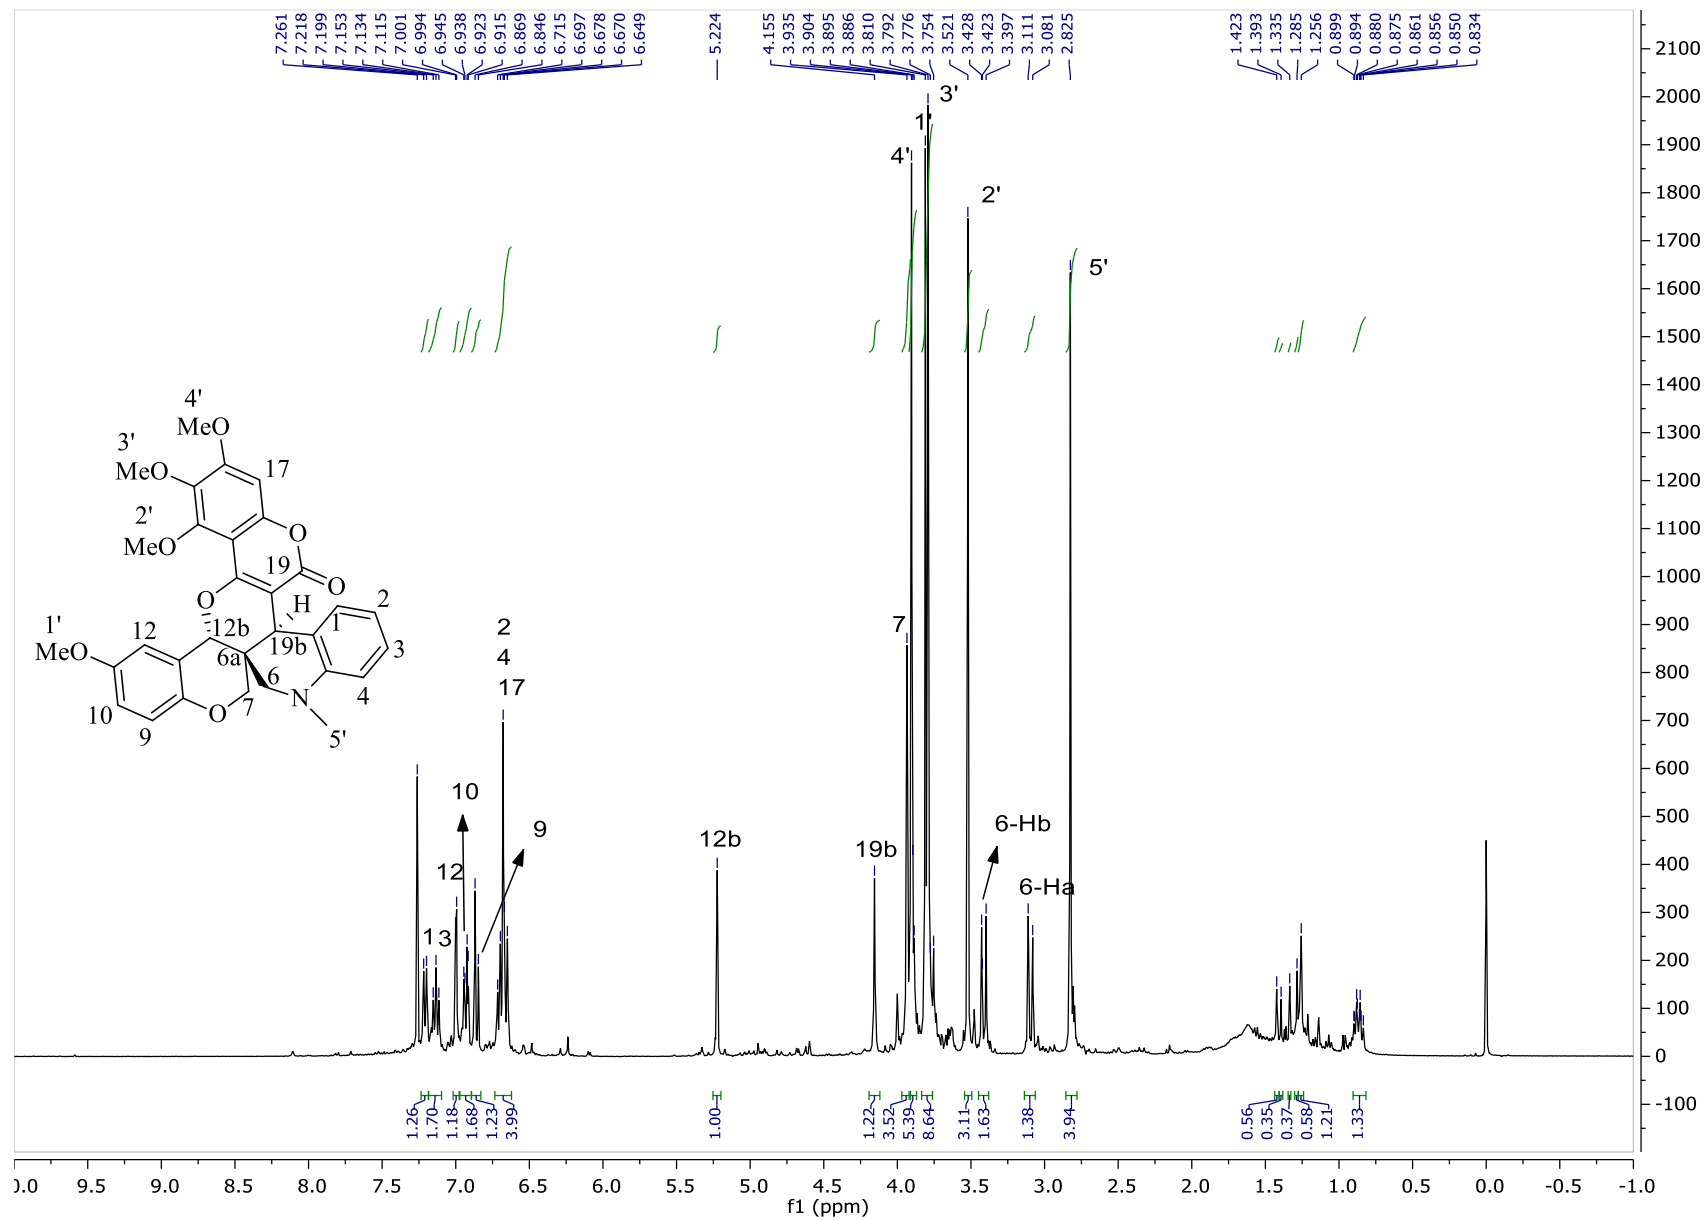

Figure S84. <sup>1</sup>H-NMR spectrum of *rac*-(6a*S*\*,12b*R*\*,19b*S*\*)-4ec in CDCl<sub>3</sub> at 400 MHz.

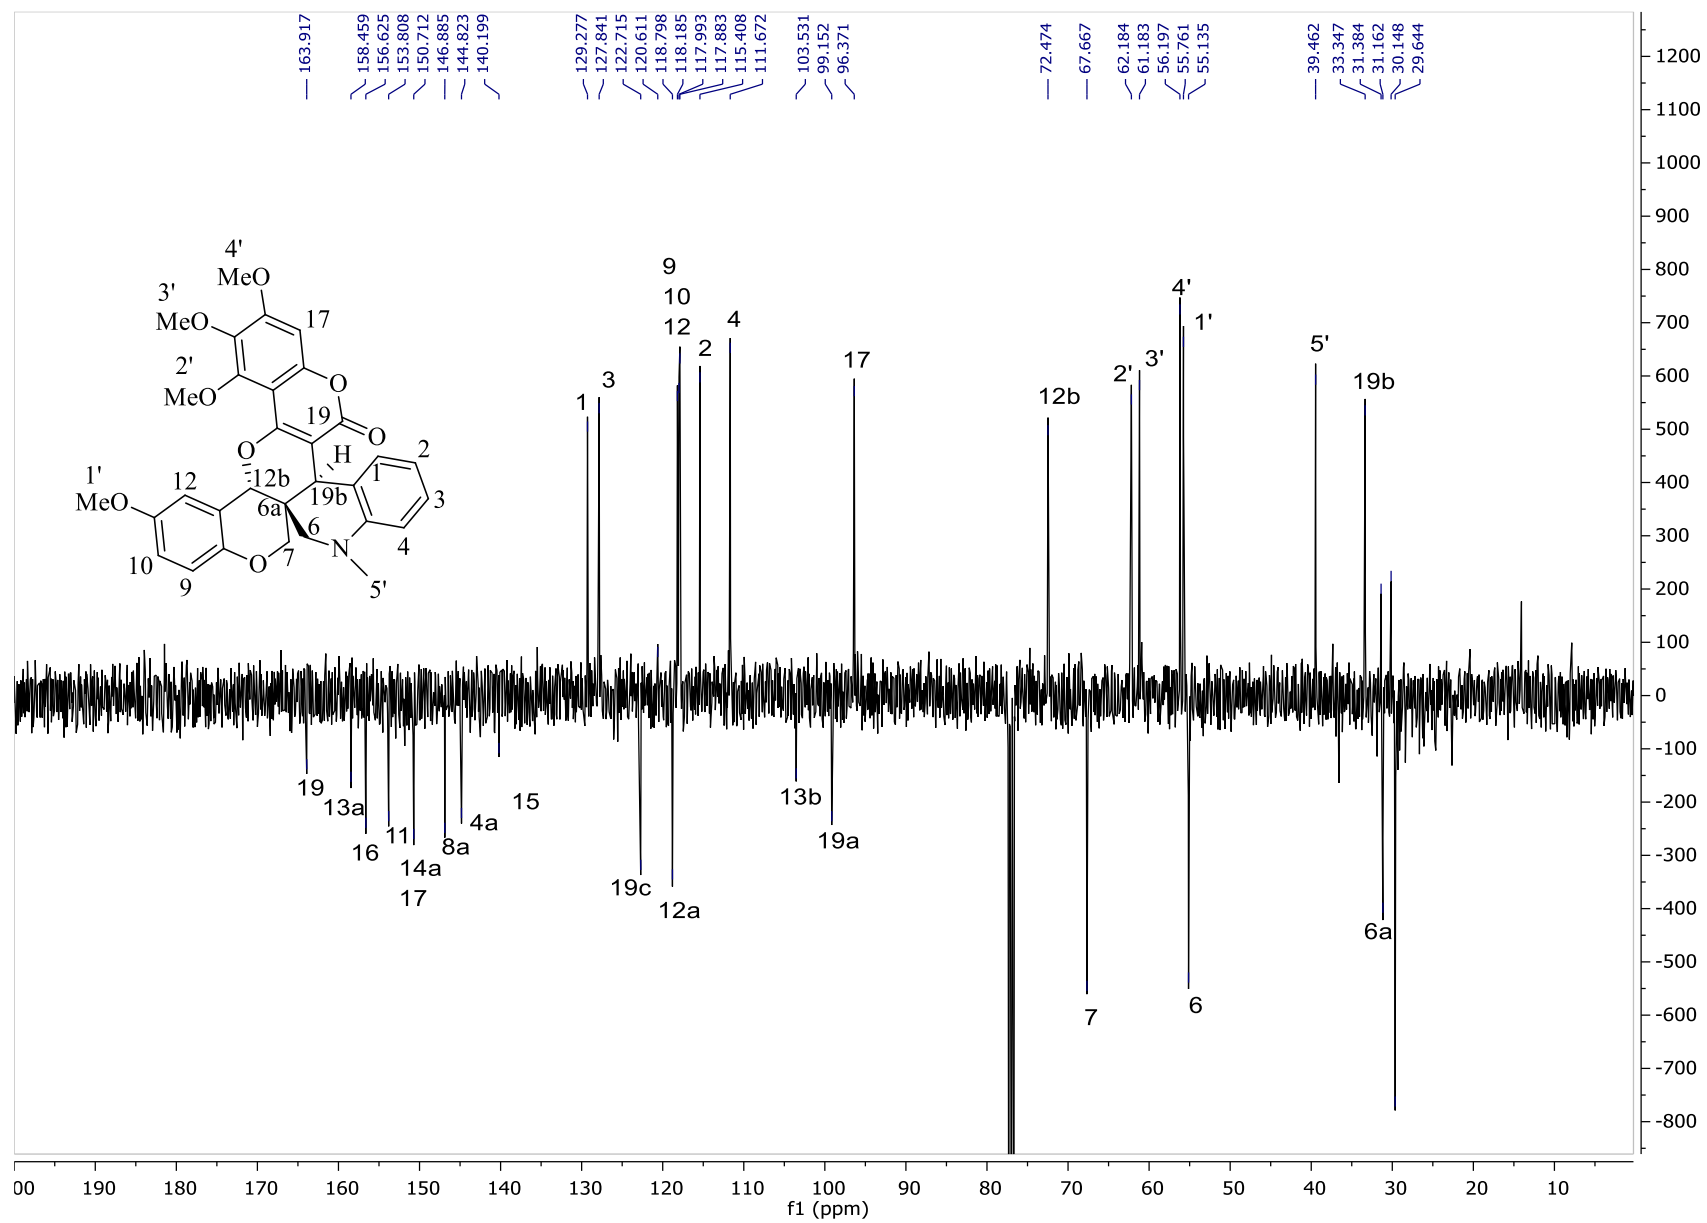

Figure S85.  $^{13}\text{C}$ -NMR spectrum of *rac*-(6a*S*\*,12b*R*\*,19b*S*\*)-4ec in  $\text{CDCl}_3$  at 100 MHz.

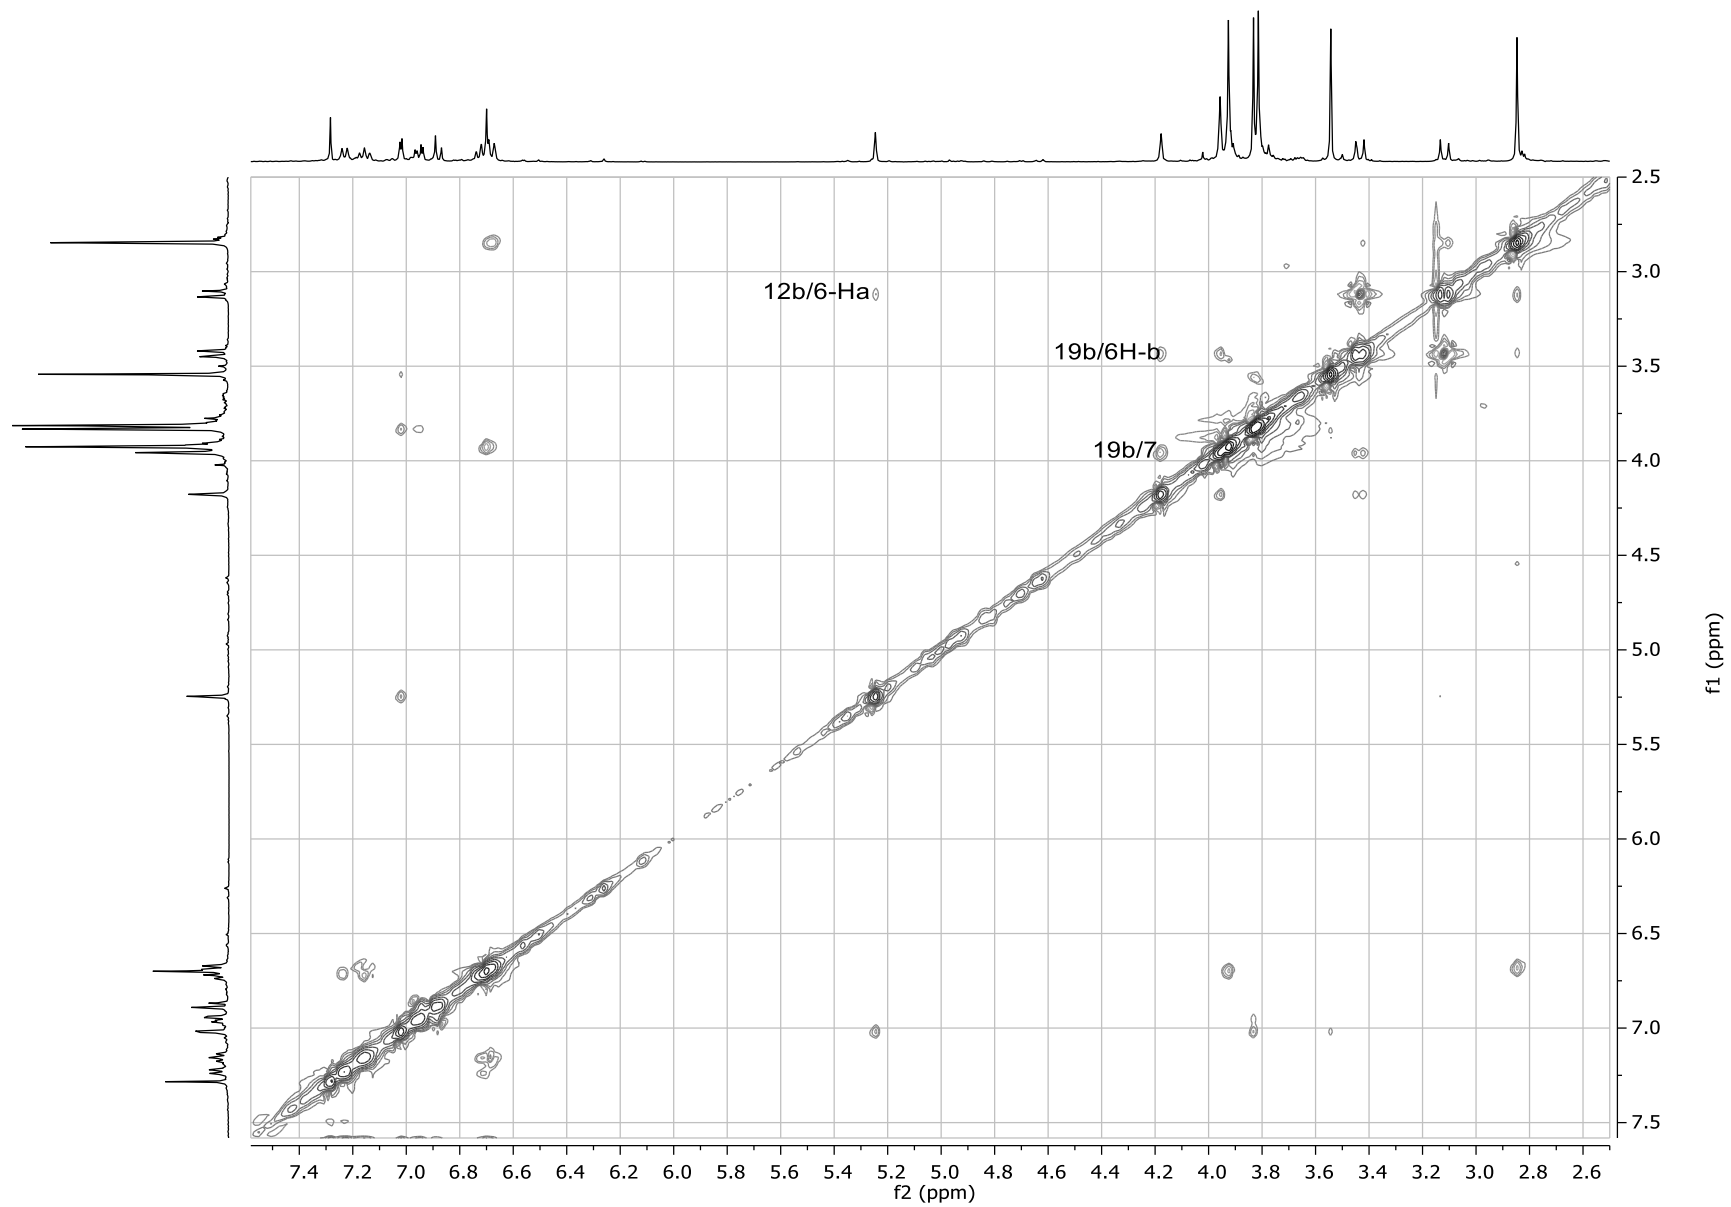

Figure S86. NOESY spectrum of *rac*-(6a*S*\*,12b*R*\*,19b*S*\*)-**4ec** in CDCl<sub>3</sub> at 400 MHz.

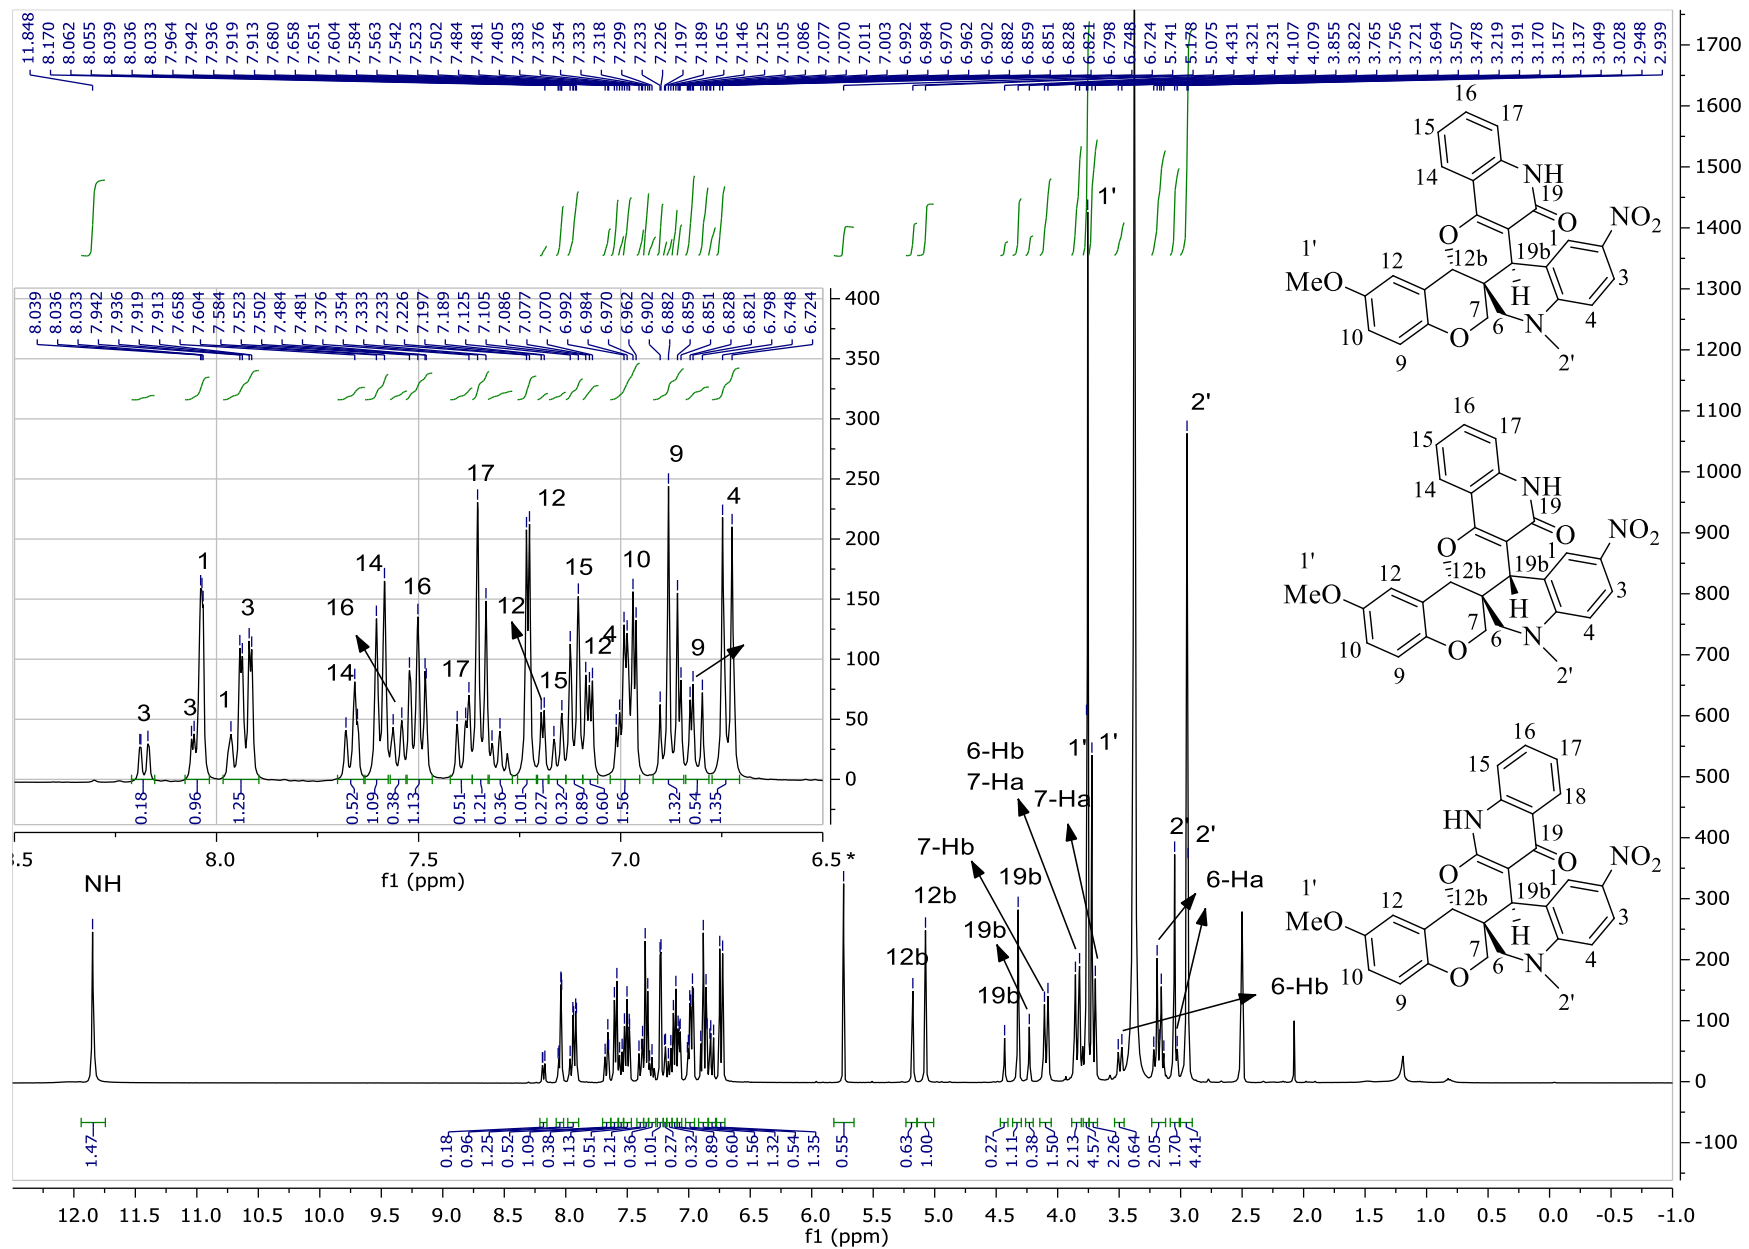

Figure S87. <sup>1</sup>H-NMR spectrum of *rac*-(6aS\*,12bR\*,19bR\*)-4ad, *rac*-(6aS\*,12bR\*,19bR\*)-6ad and *rac*-(6aS\*,12bR\*,19bS\*)-5ad in DMSO-*d*<sub>6</sub> at 400 MHz.

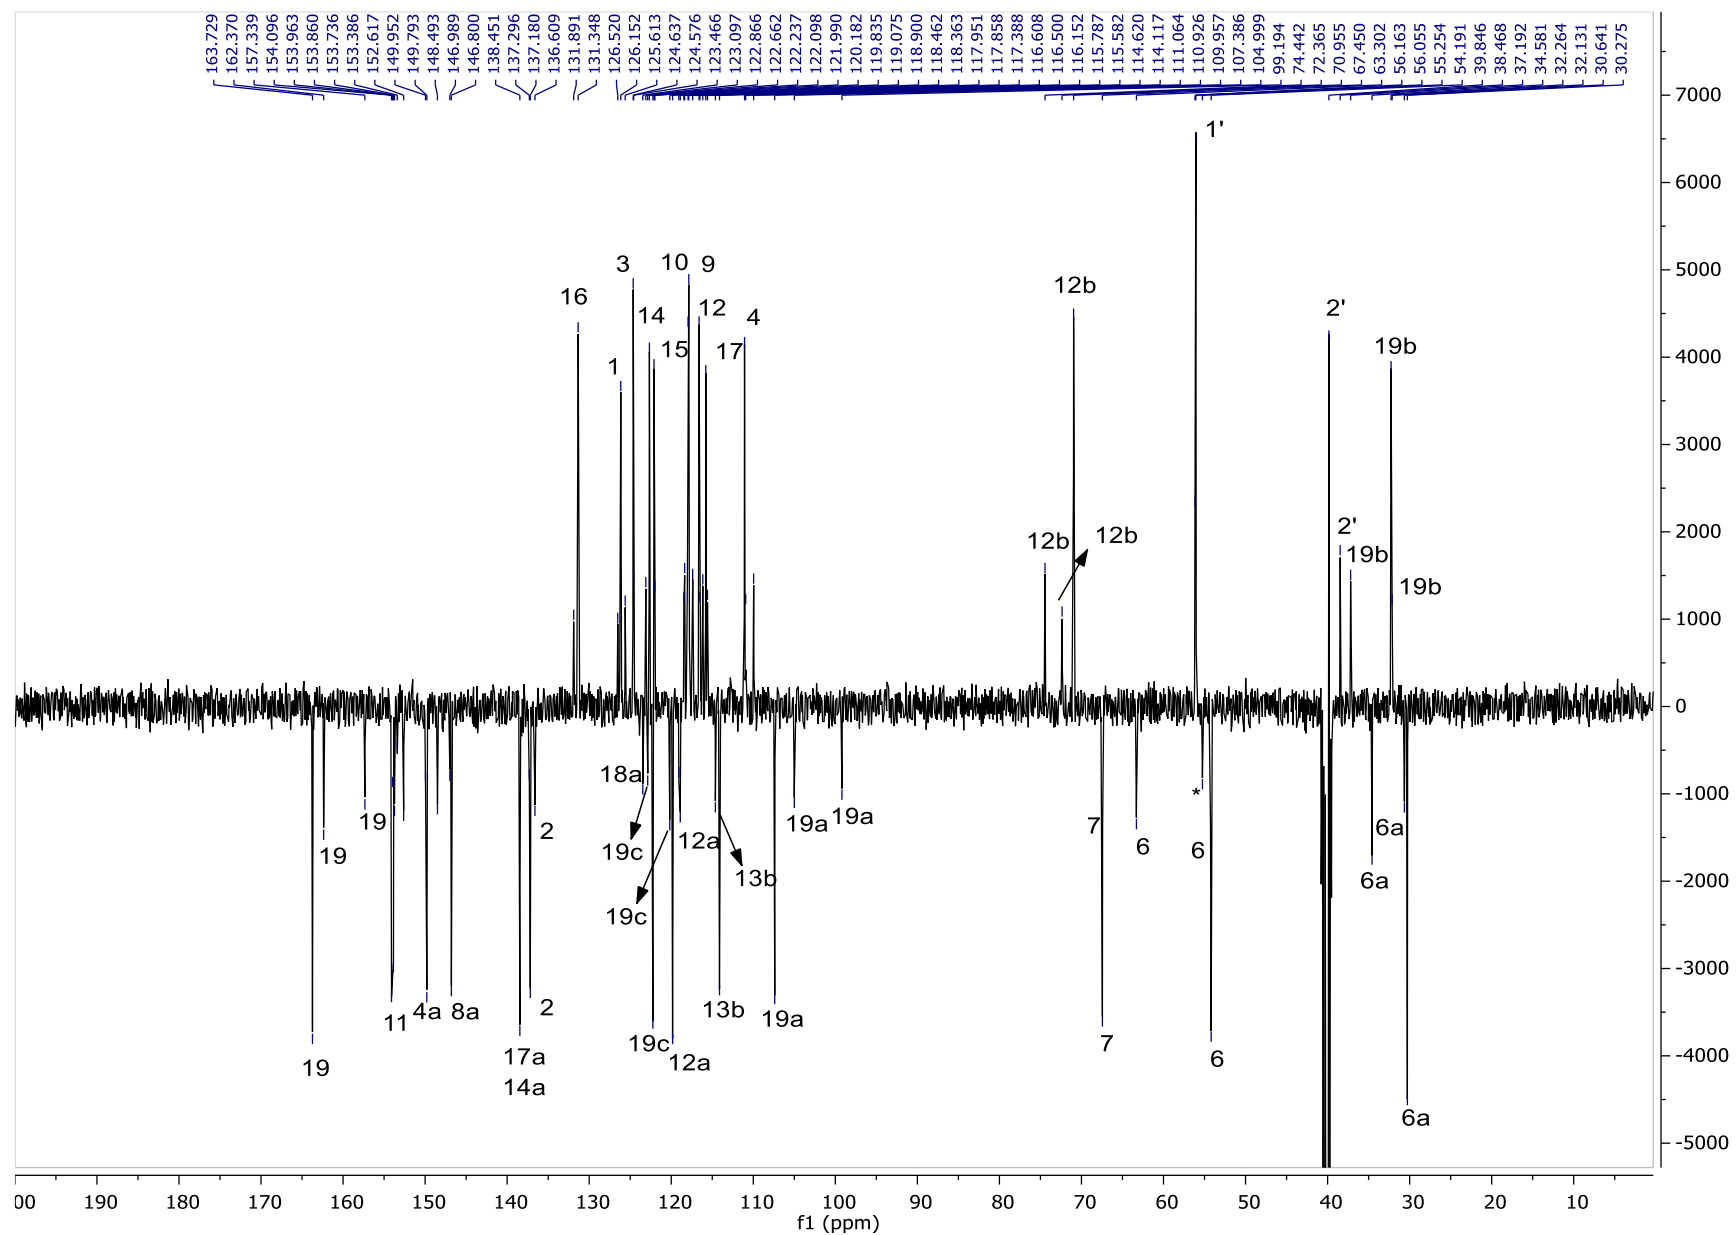

Figure S88.  $^1\text{H}$ -NMR spectrum of *rac*-(6a*S*<sup>\*</sup>,12b*R*<sup>\*</sup>,19b*R*<sup>\*</sup>)-**4ad**, *rac*-(6a*S*<sup>\*</sup>,12b*R*<sup>\*</sup>,19b*R*<sup>\*</sup>)-**6ad** and *rac*-(6a*S*<sup>\*</sup>,12b*R*<sup>\*</sup>,19b*S*<sup>\*</sup>)-**5ad** in DMSO-*d*<sub>6</sub> at 400 MHz.

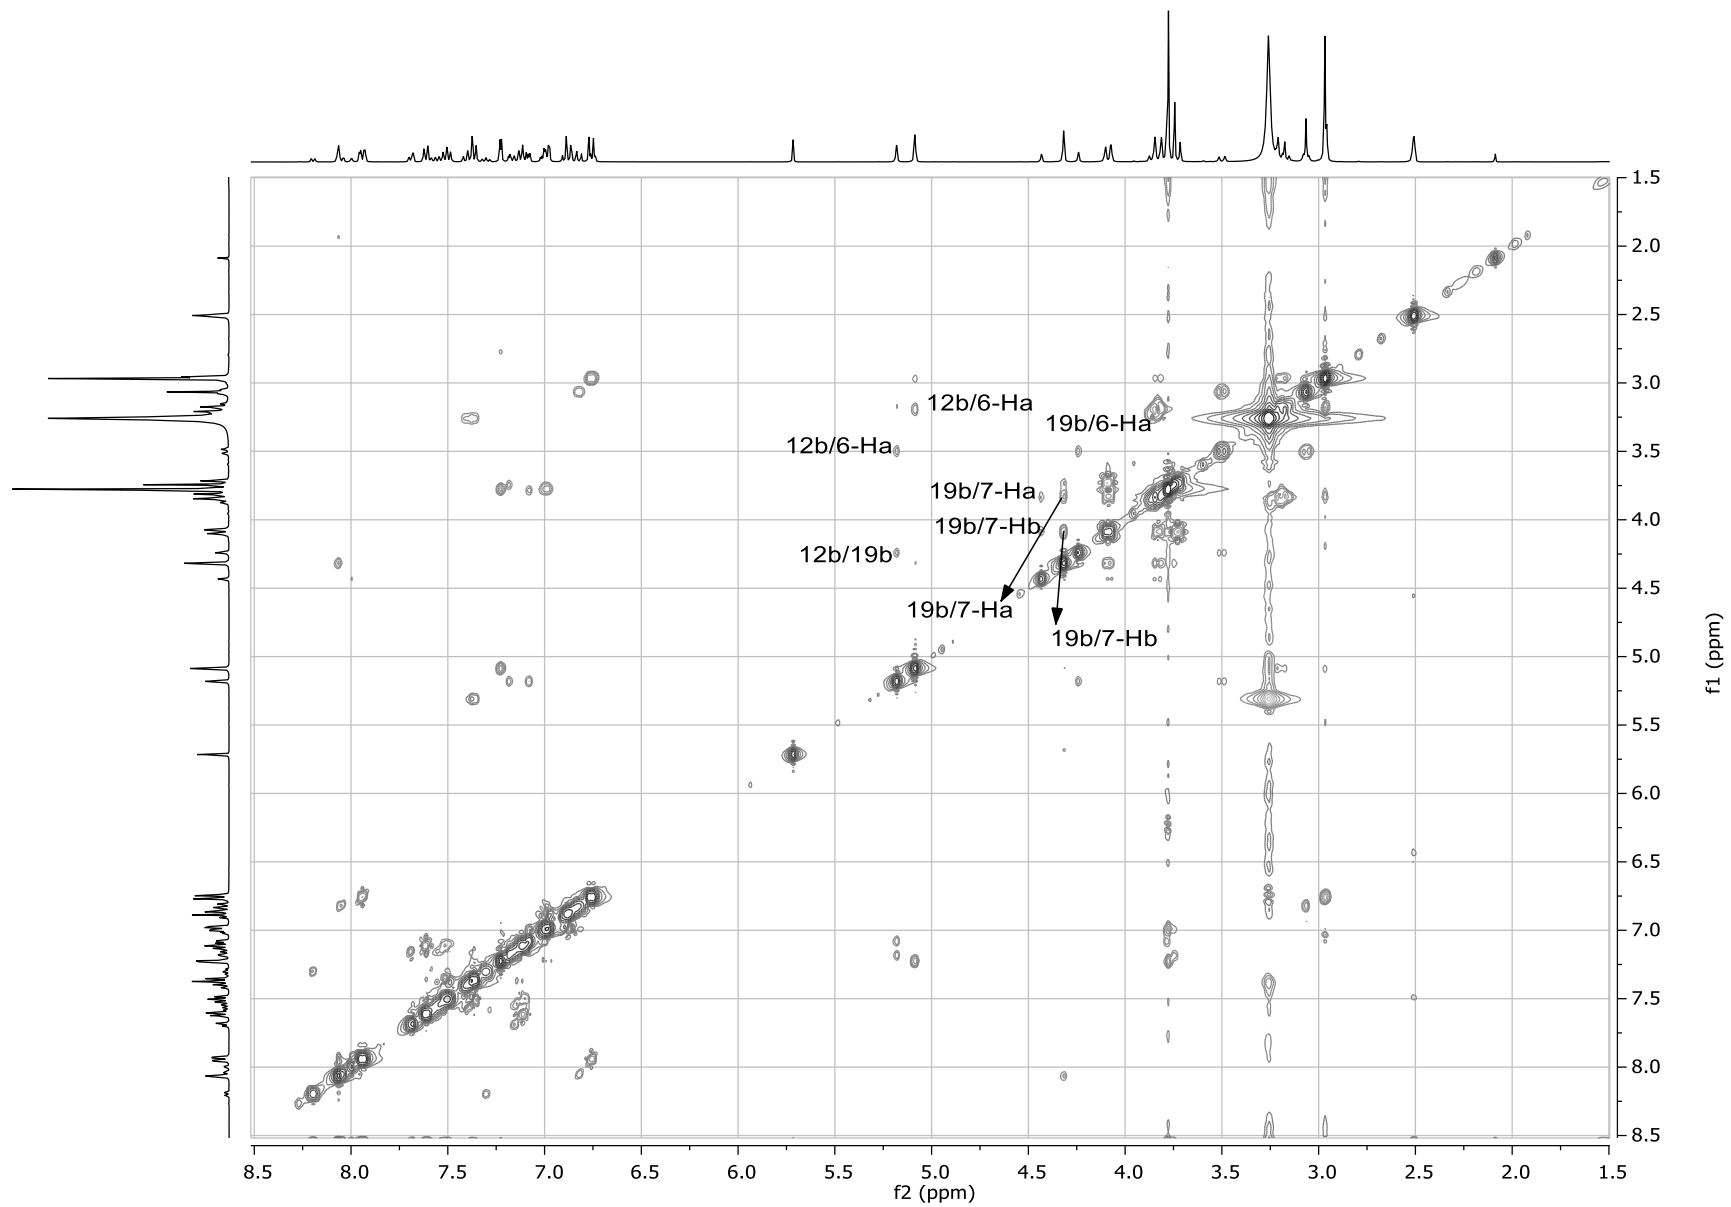

Figure S89. <sup>1</sup>H-NMR spectrum of *rac*-(6a*S*\*,12b*R*\*,19b*R*\*)-**4ad**, *rac*-(6a*S*\*,12b*R*\*,19b*R*\*)-**6ad** and *rac*-(6a*S*\*,12b*R*\*,19b*S*\*)-**5ad** in DMSO-*d*<sub>6</sub> at 400 MHz.

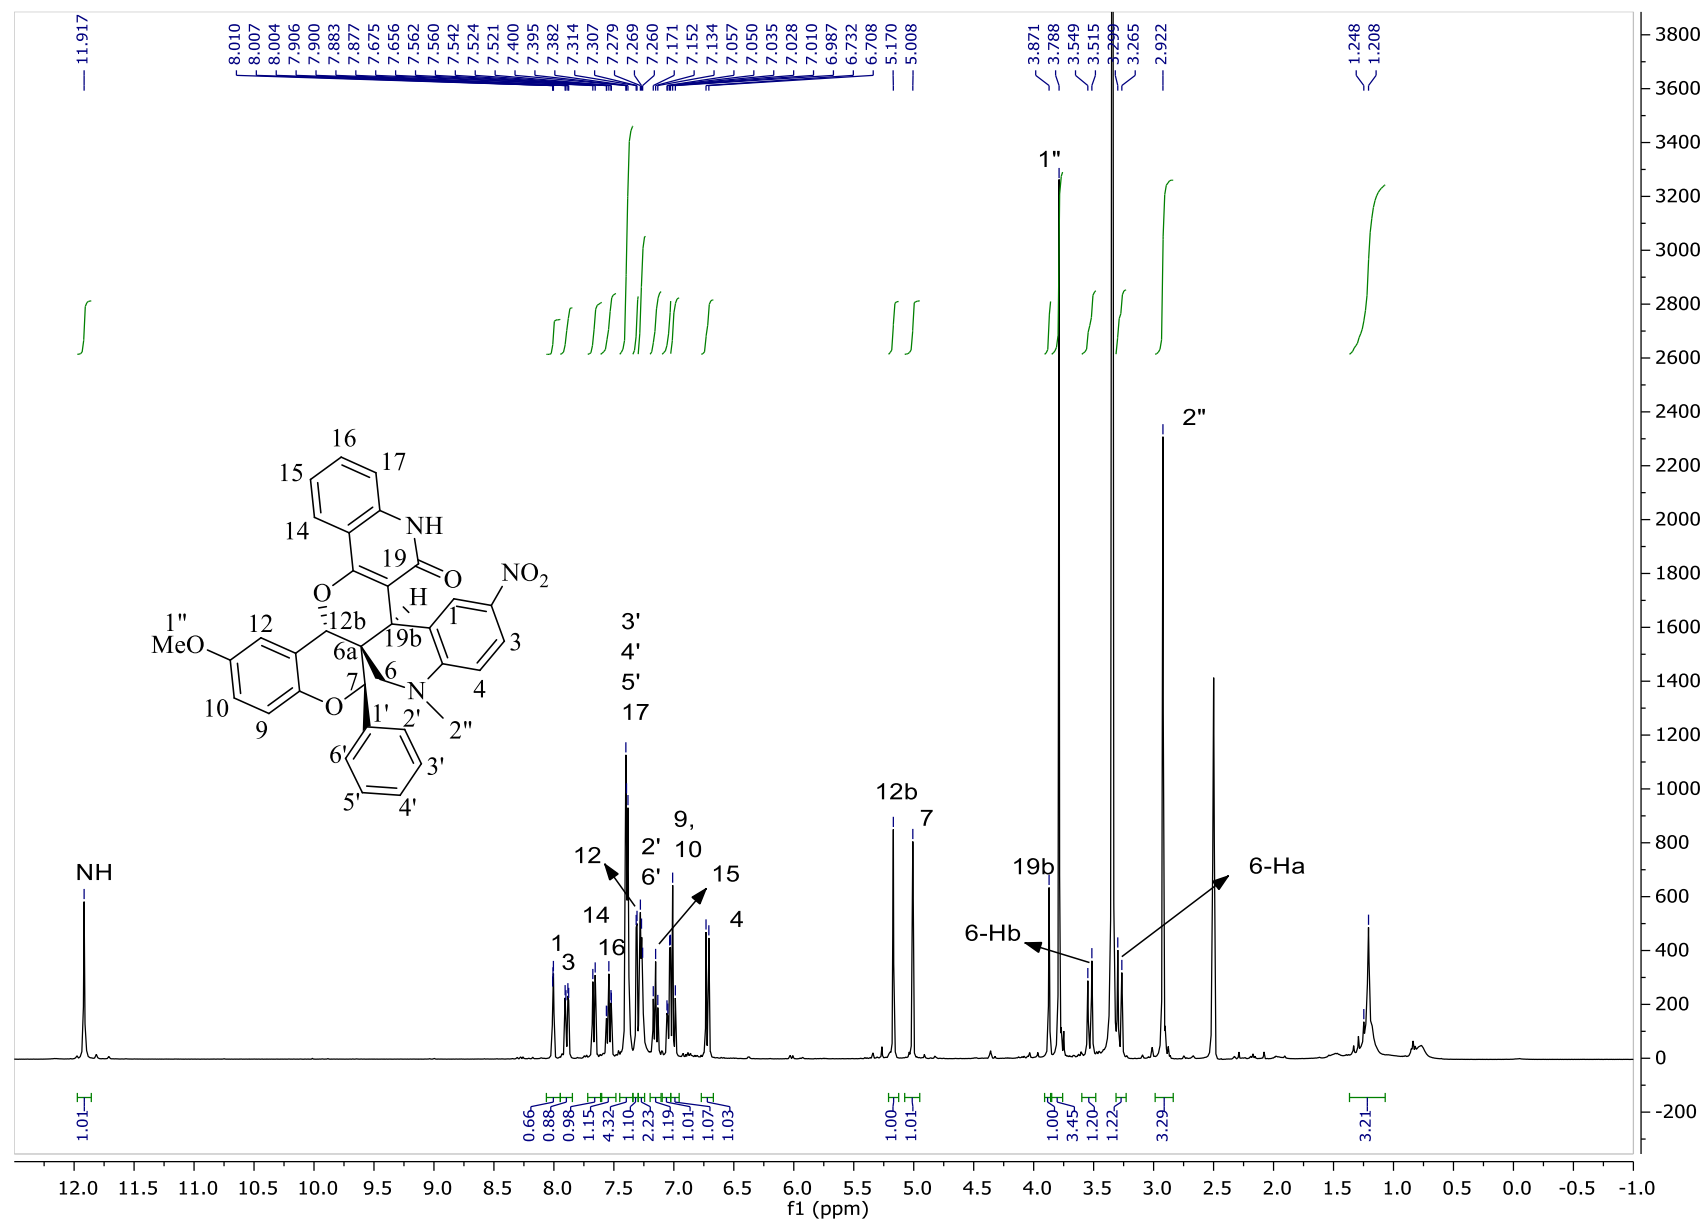

Figure S90.  $^1\text{H-NMR}$  spectrum of *rac*-(6a*S*<sup>\*</sup>,7*R*<sup>\*</sup>,12b*R*<sup>\*</sup>,19b*S*<sup>\*</sup>)-**4bd** in  $\text{DMSO-}d_6$  at 400 MHz.



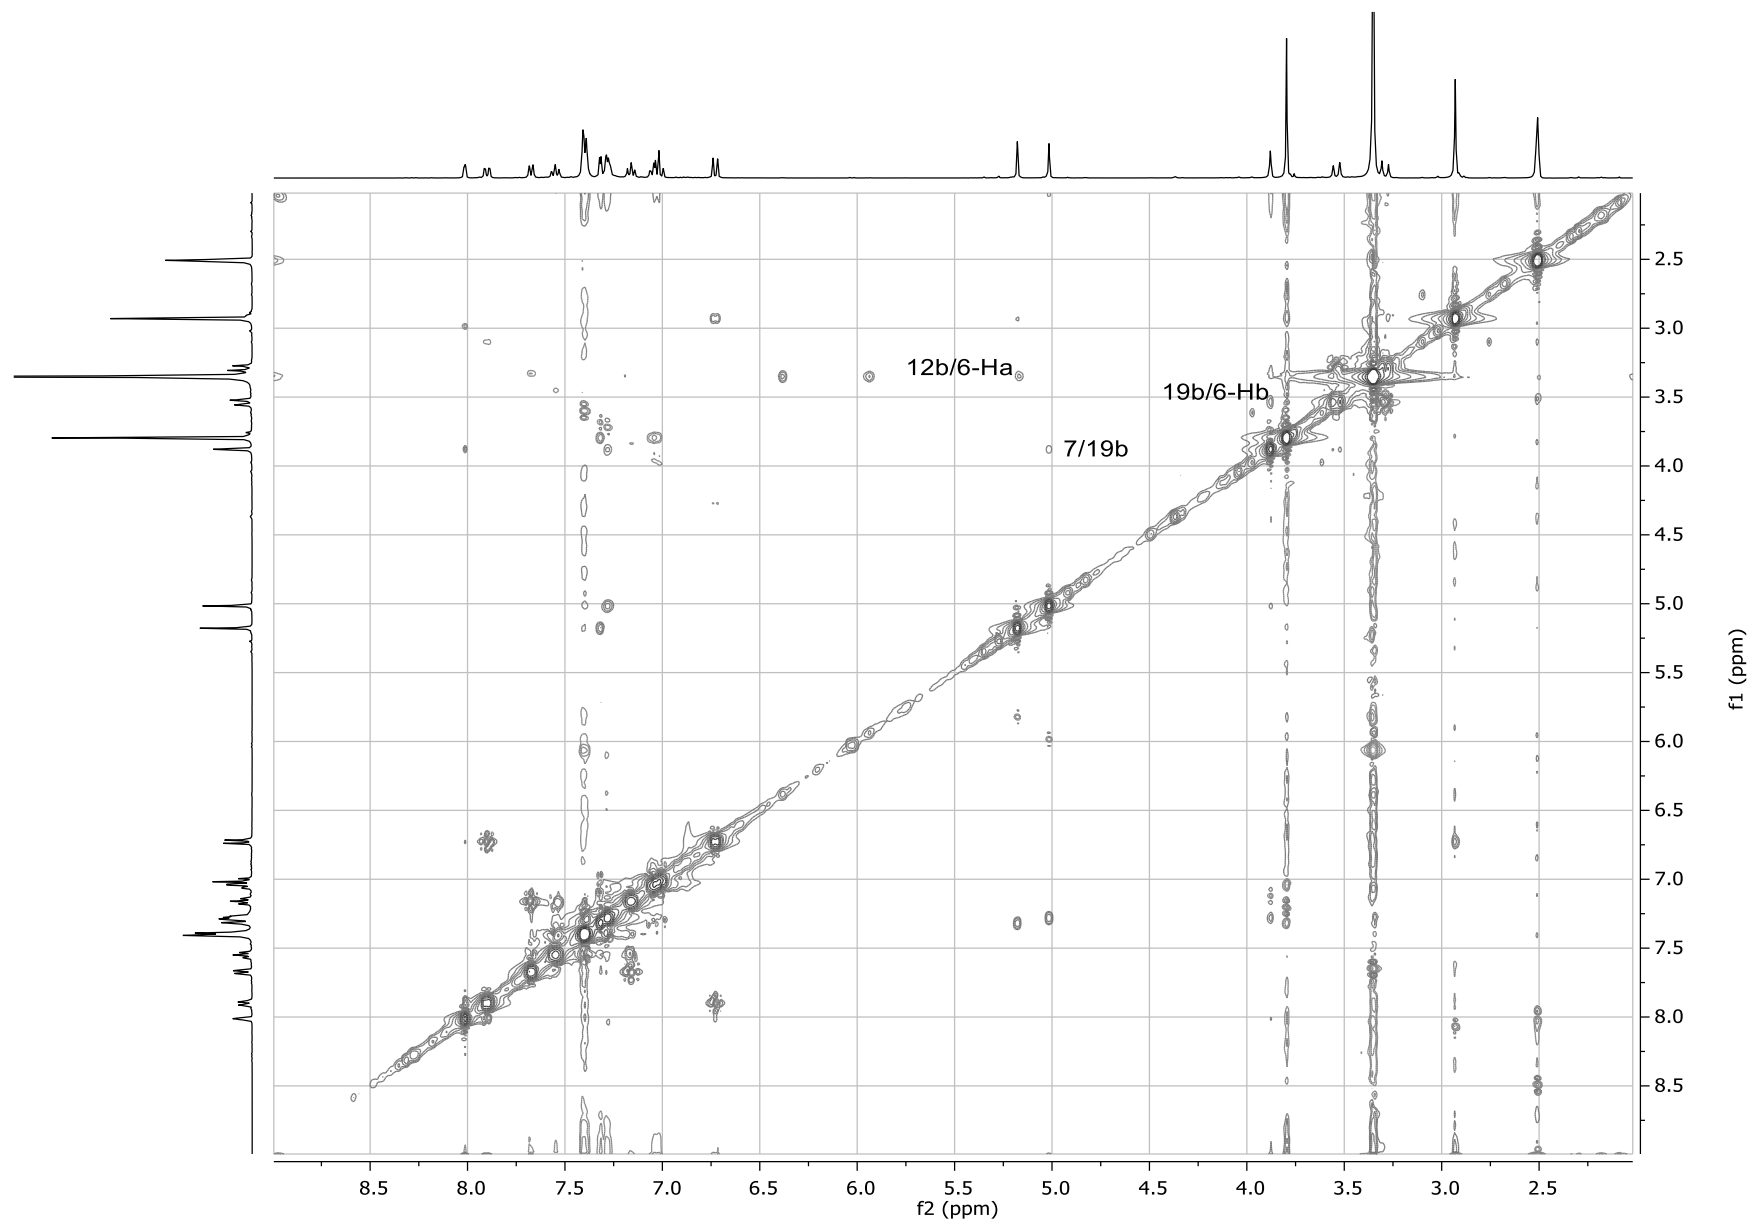

Figure S92. NOESY spectrum of *rac*-(6a*S*\*,7*R*\*,12b*R*\*,19b*S*\*)-**4bd** in DMSO-*d*<sub>6</sub> at 400 MHz.

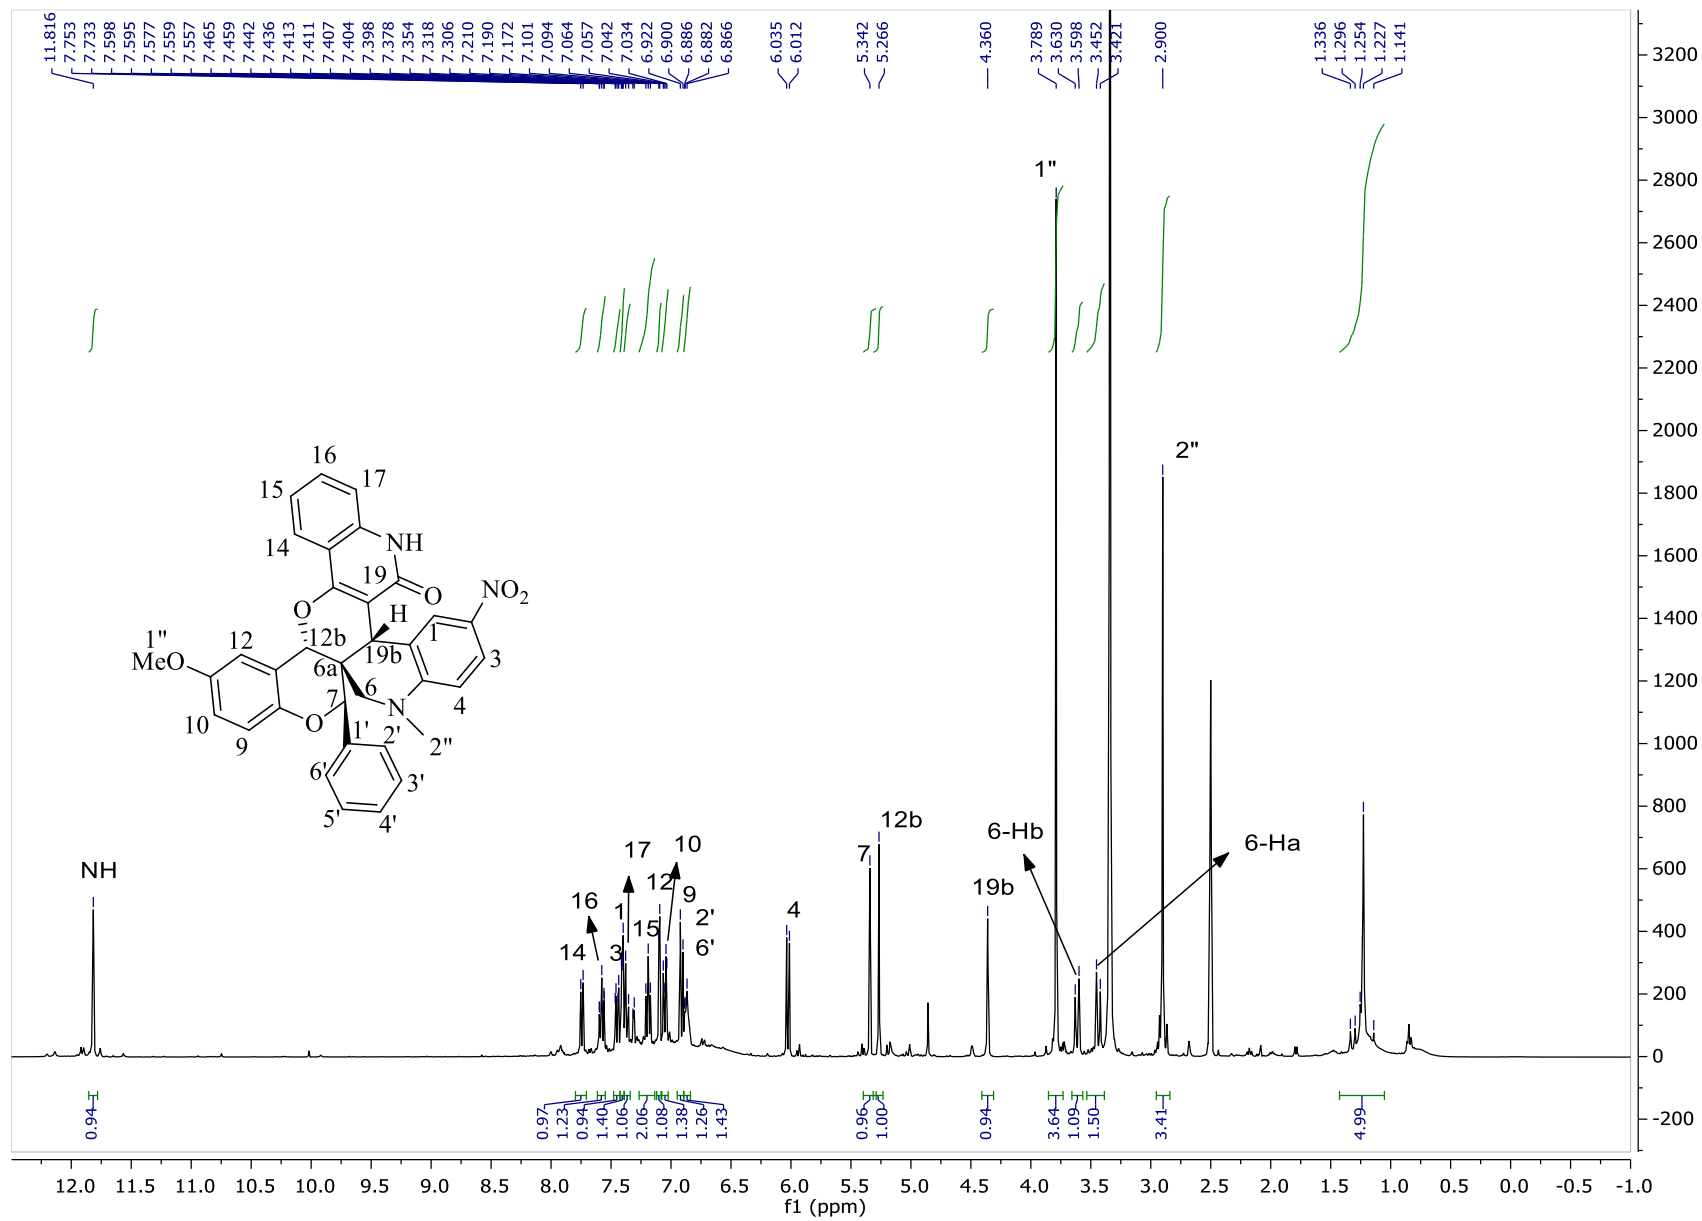

Figure S93. <sup>1</sup>H-NMR spectrum of *rac*-(6aS\*,7R\*,12bR\*,19bS\*)-5bd in DMSO-*d*<sub>6</sub> at 400 MHz.

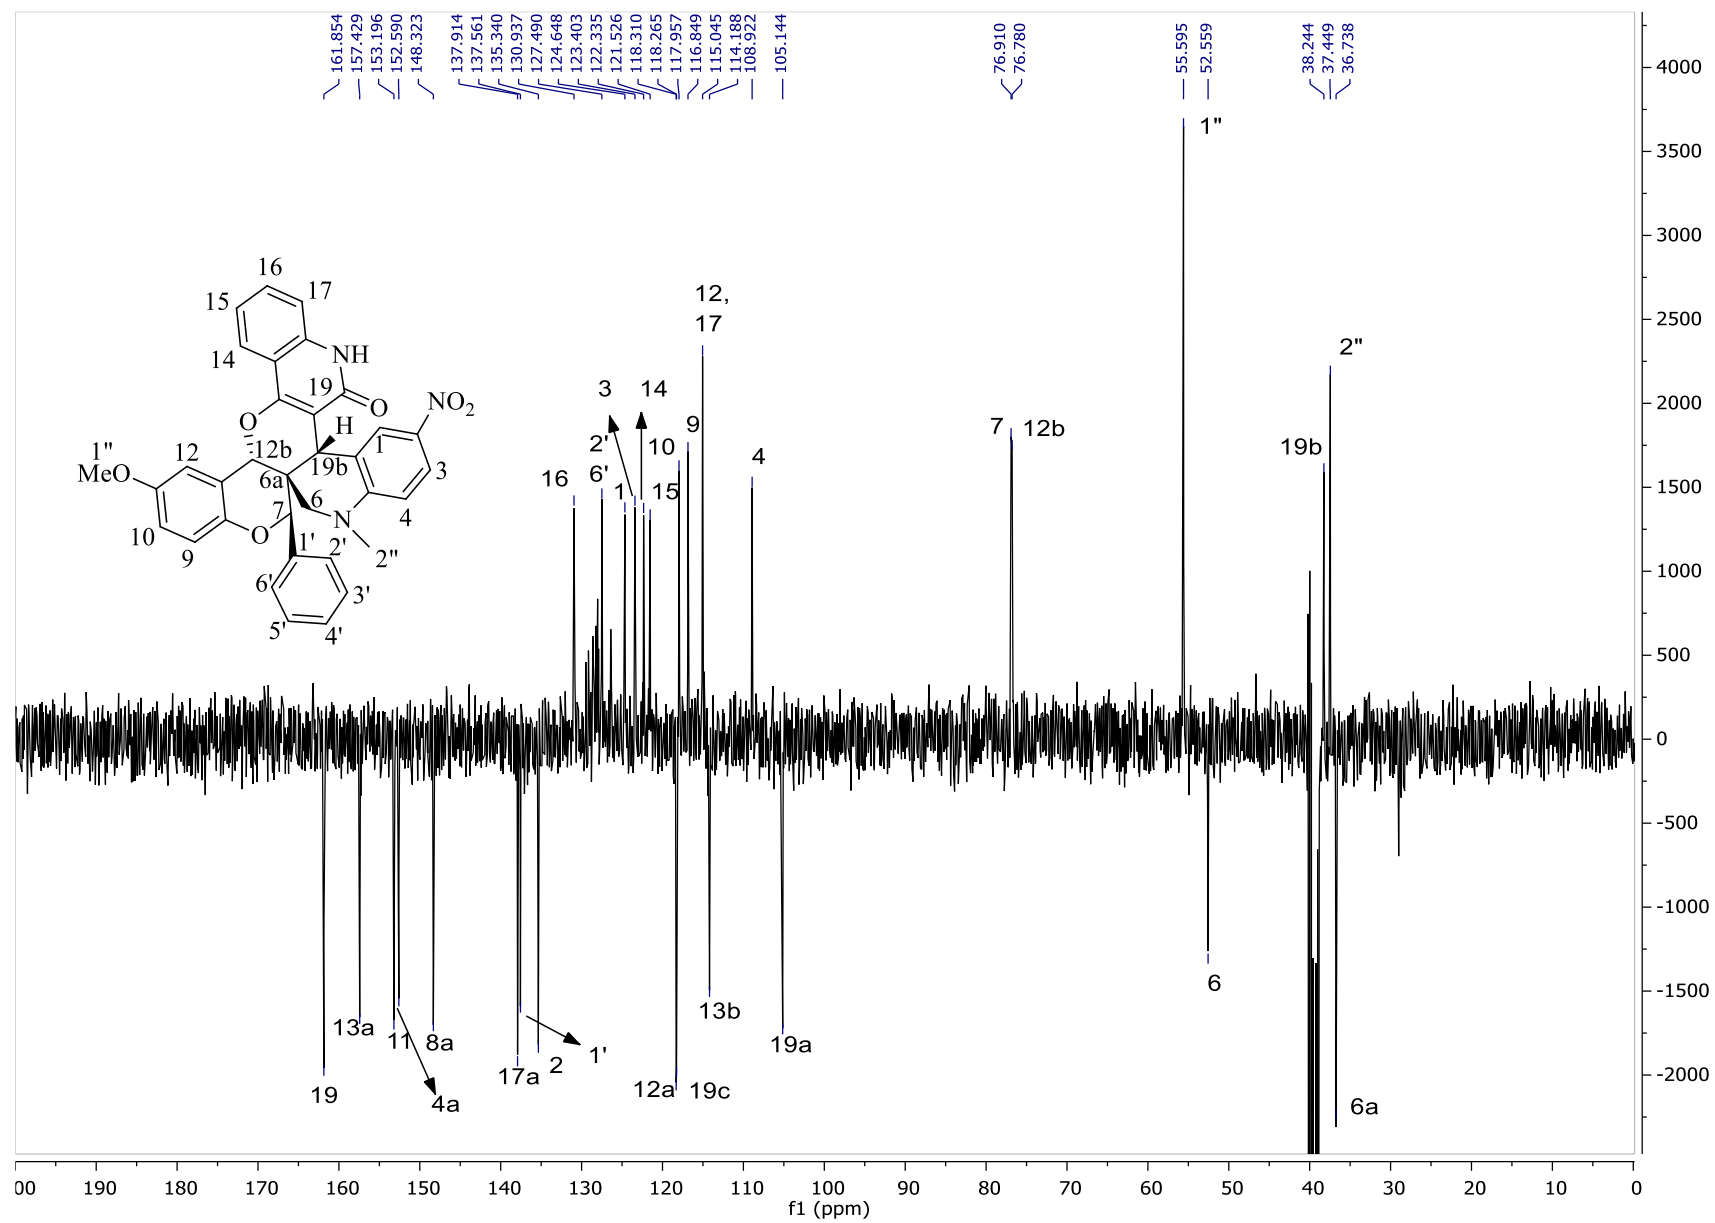

Figure S94.  $^{13}\text{C}$ -NMR spectrum of *rac*-(6a*S*\*,7*R*\*,12b*R*\*,19b*S*\*)-5bd in DMSO-*d*<sub>6</sub> at 100 MHz.

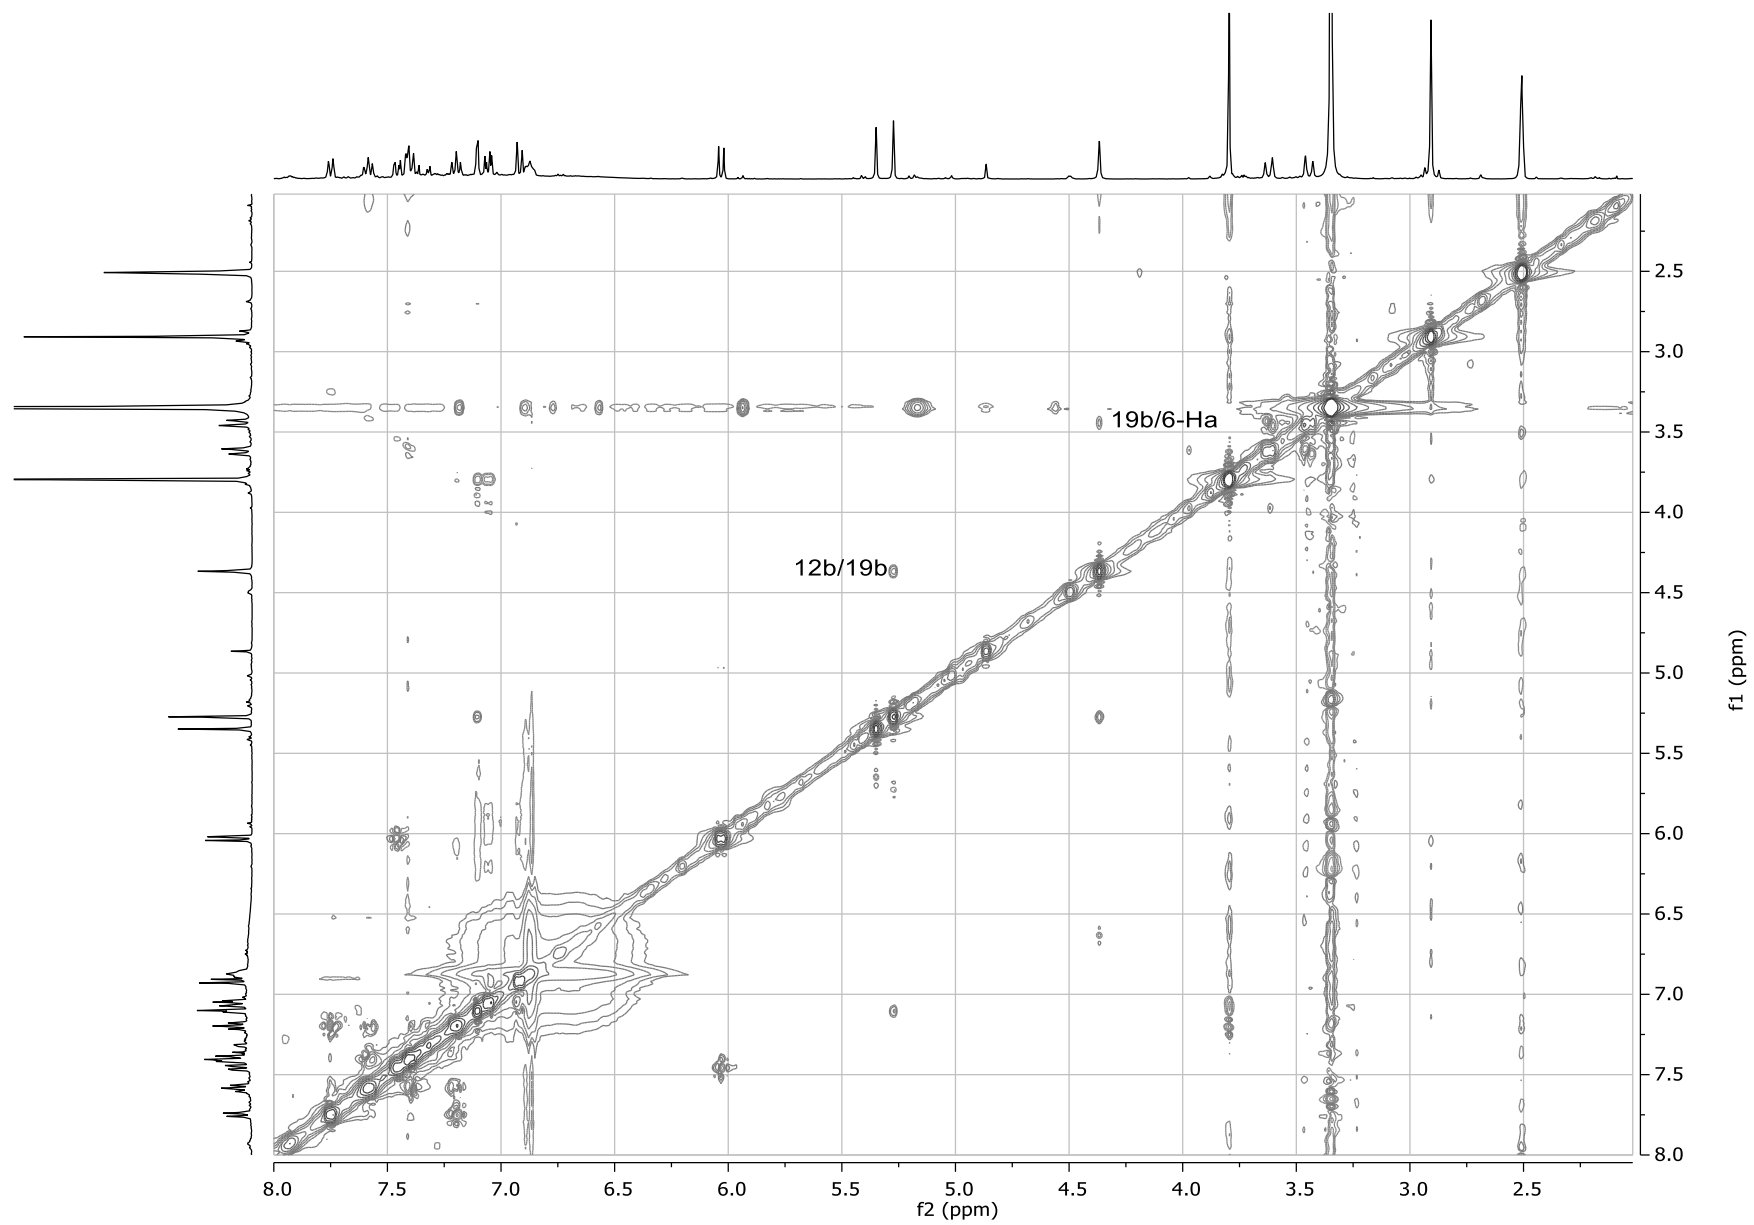

Figure S95. NOESY spectrum of *rac*-(6a*S*<sup>\*</sup>,7*R*<sup>\*</sup>,12*bR*<sup>\*</sup>,19*bS*<sup>\*</sup>)-**5bd** in DMSO-*d*<sub>6</sub> at 400 MHz.

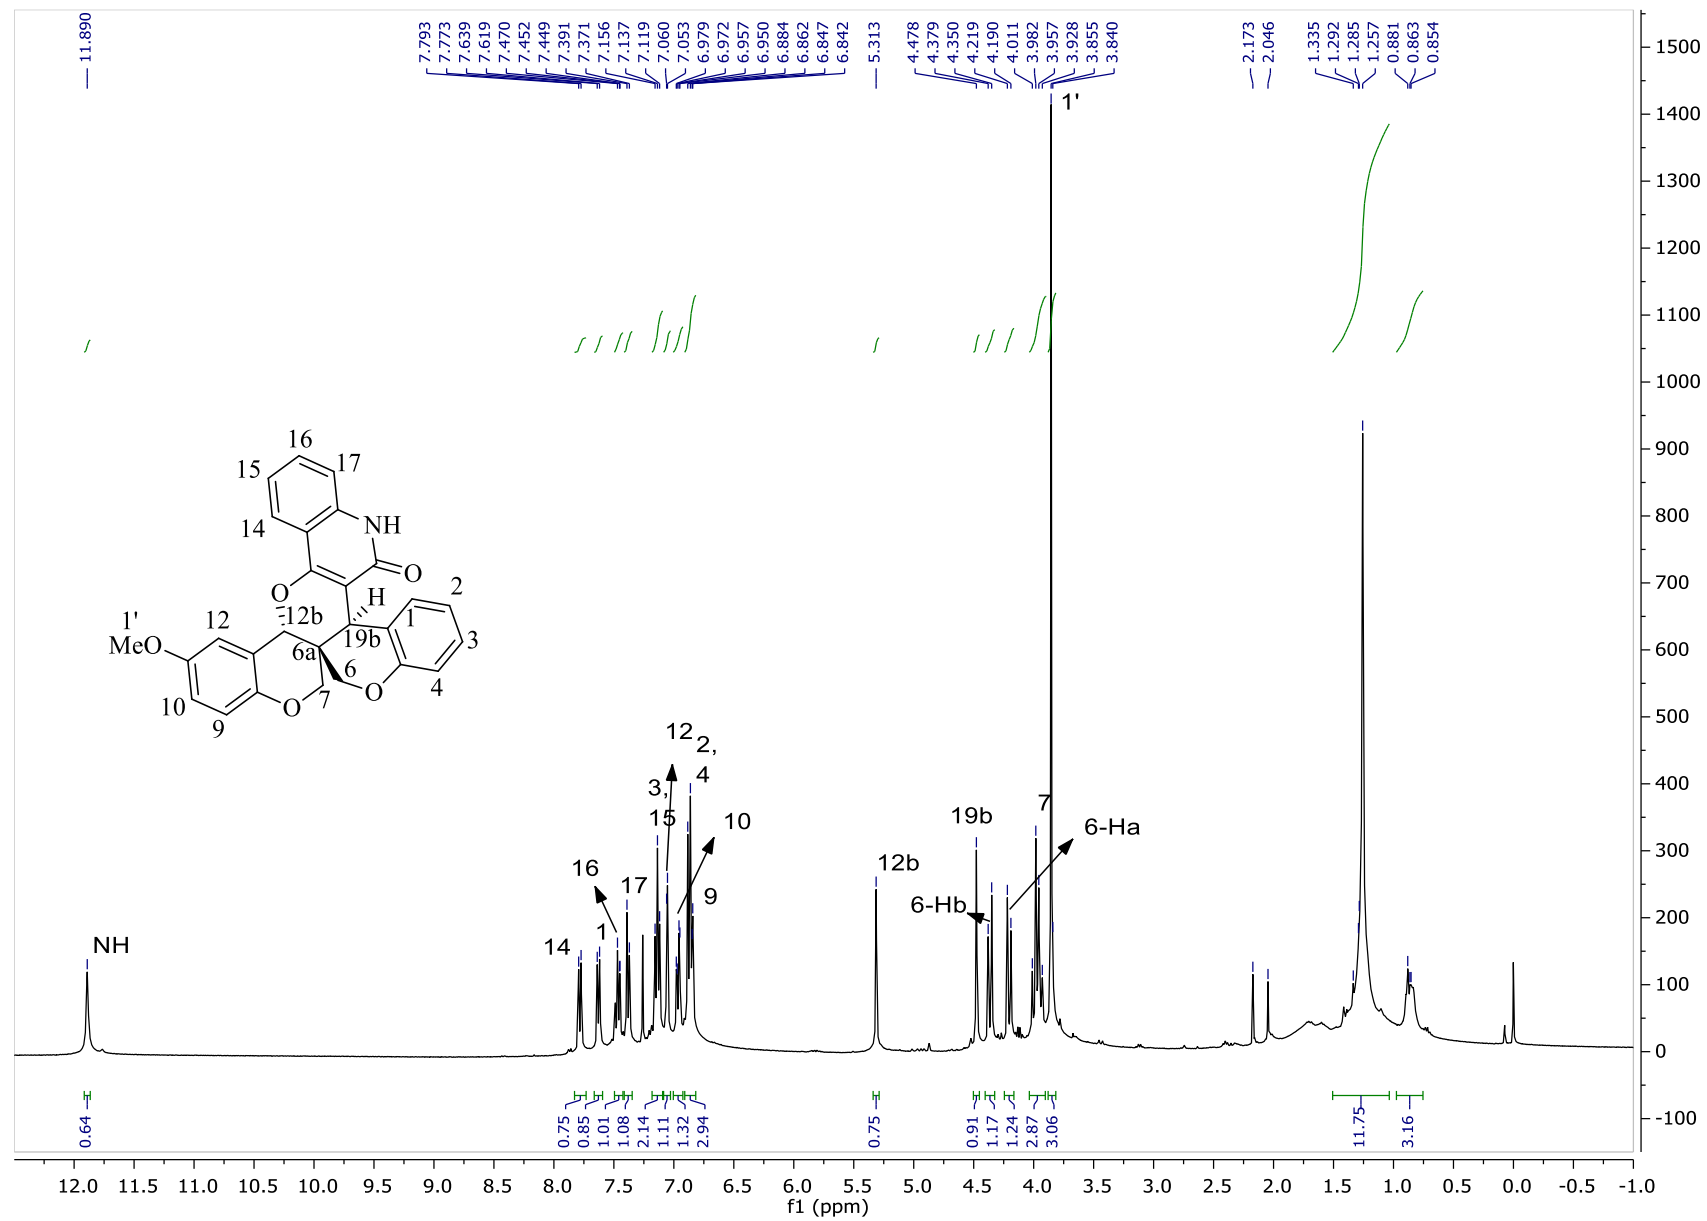

Figure S96. <sup>1</sup>H-NMR spectrum of *rac*-(6a*S*\*,12b*R*\*,19b*R*\*)-4cd in CDCl<sub>3</sub> at 400 MHz.

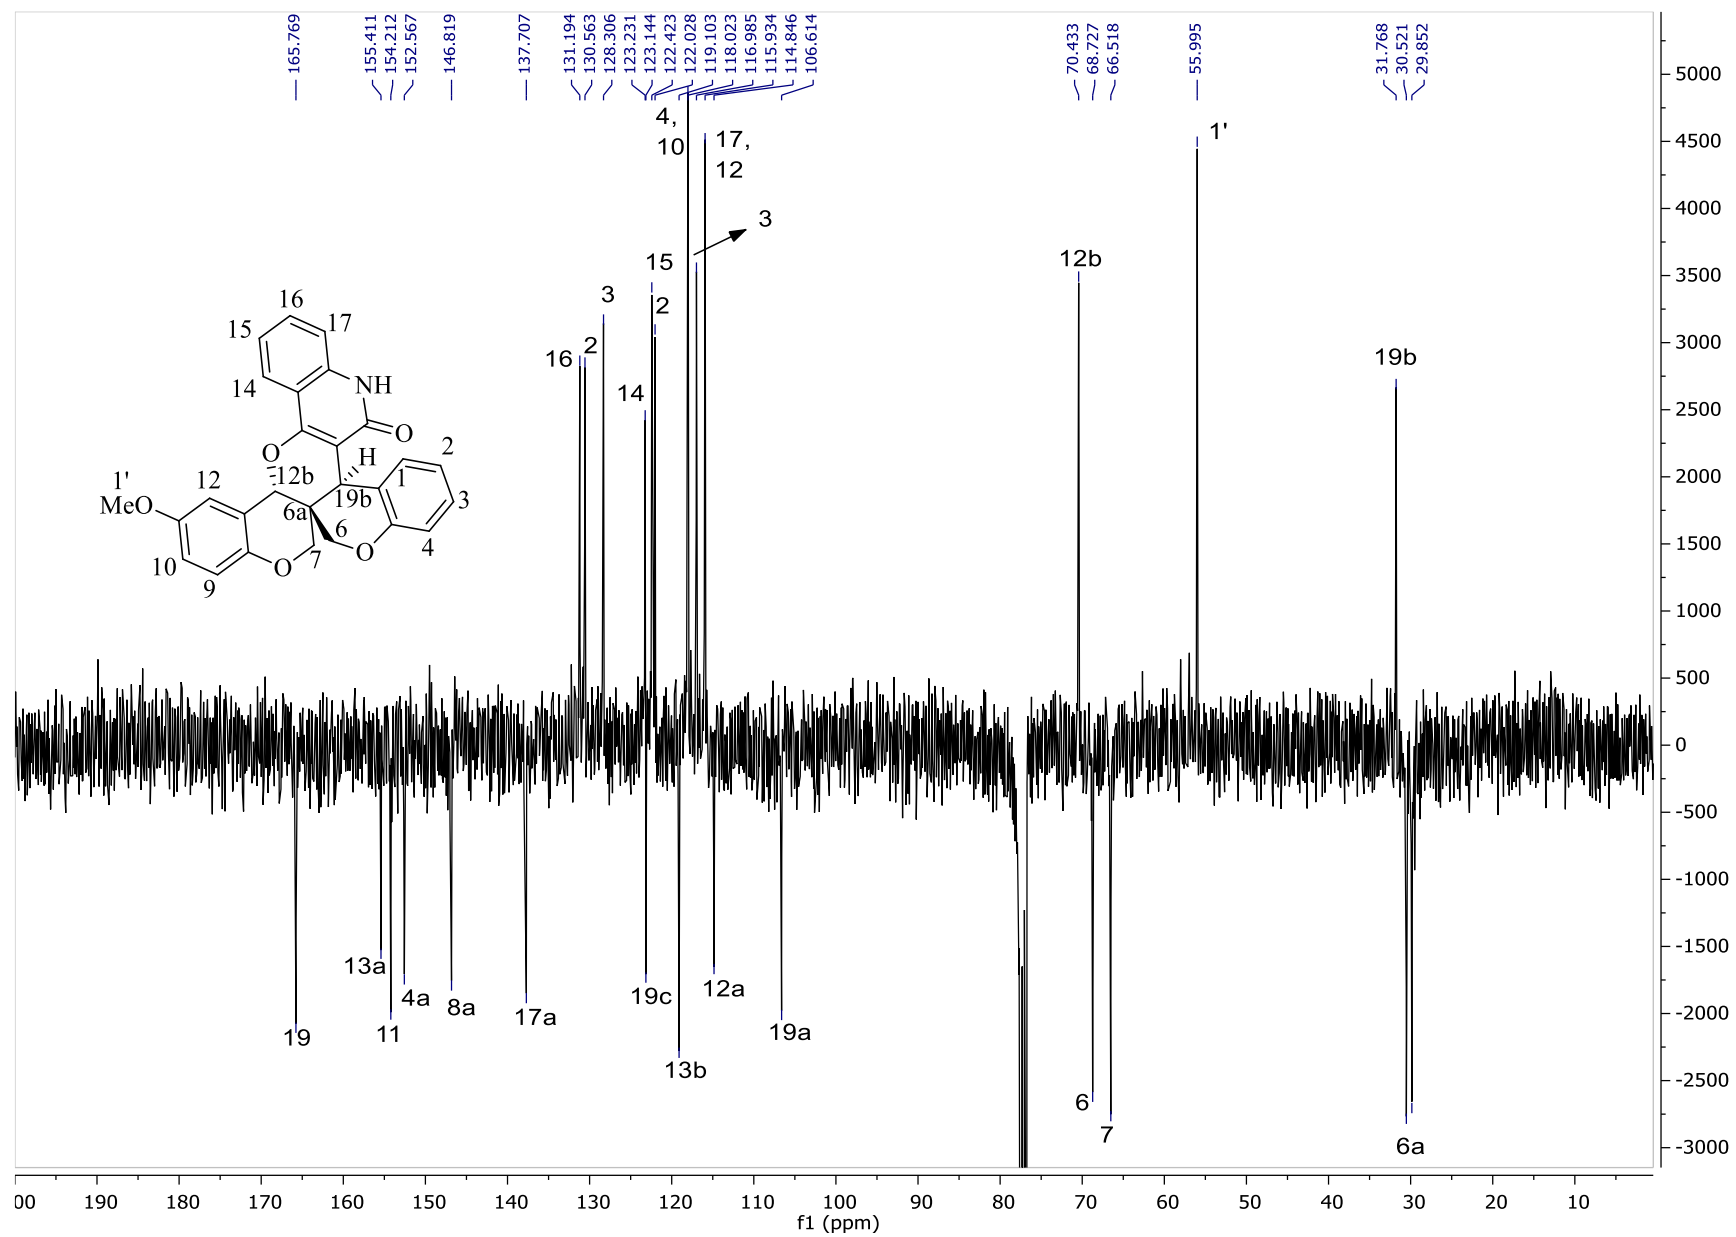

Figure S97. <sup>13</sup>C-NMR spectrum of *rac*-(6a*S*\*,12b*R*\*,19b*R*\*)-4cd in CDCl<sub>3</sub> at 100 MHz.

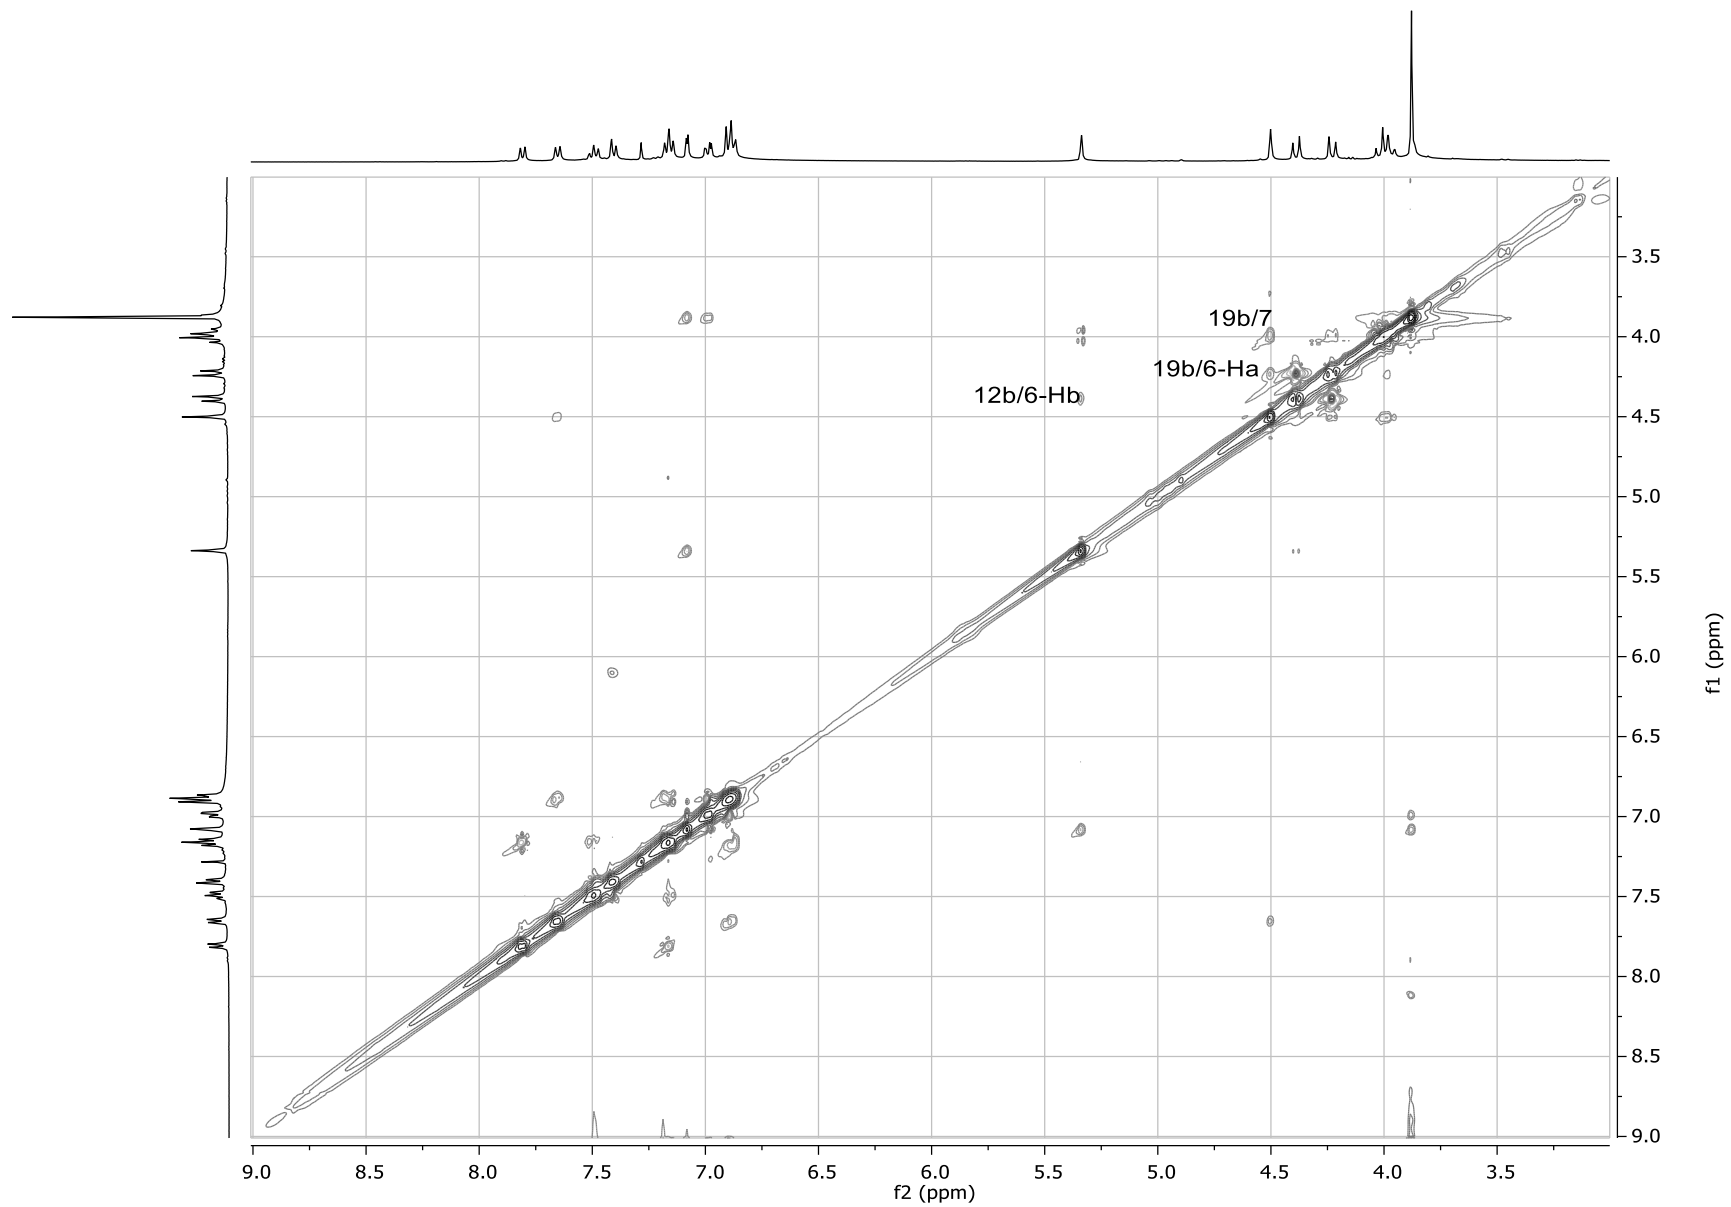

Figure S98. NOESY spectrum of *rac*-(6a*S*\*,12b*R*\*,19b*R*\*)-**4cd** in CDCl<sub>3</sub> at 400 MHz.

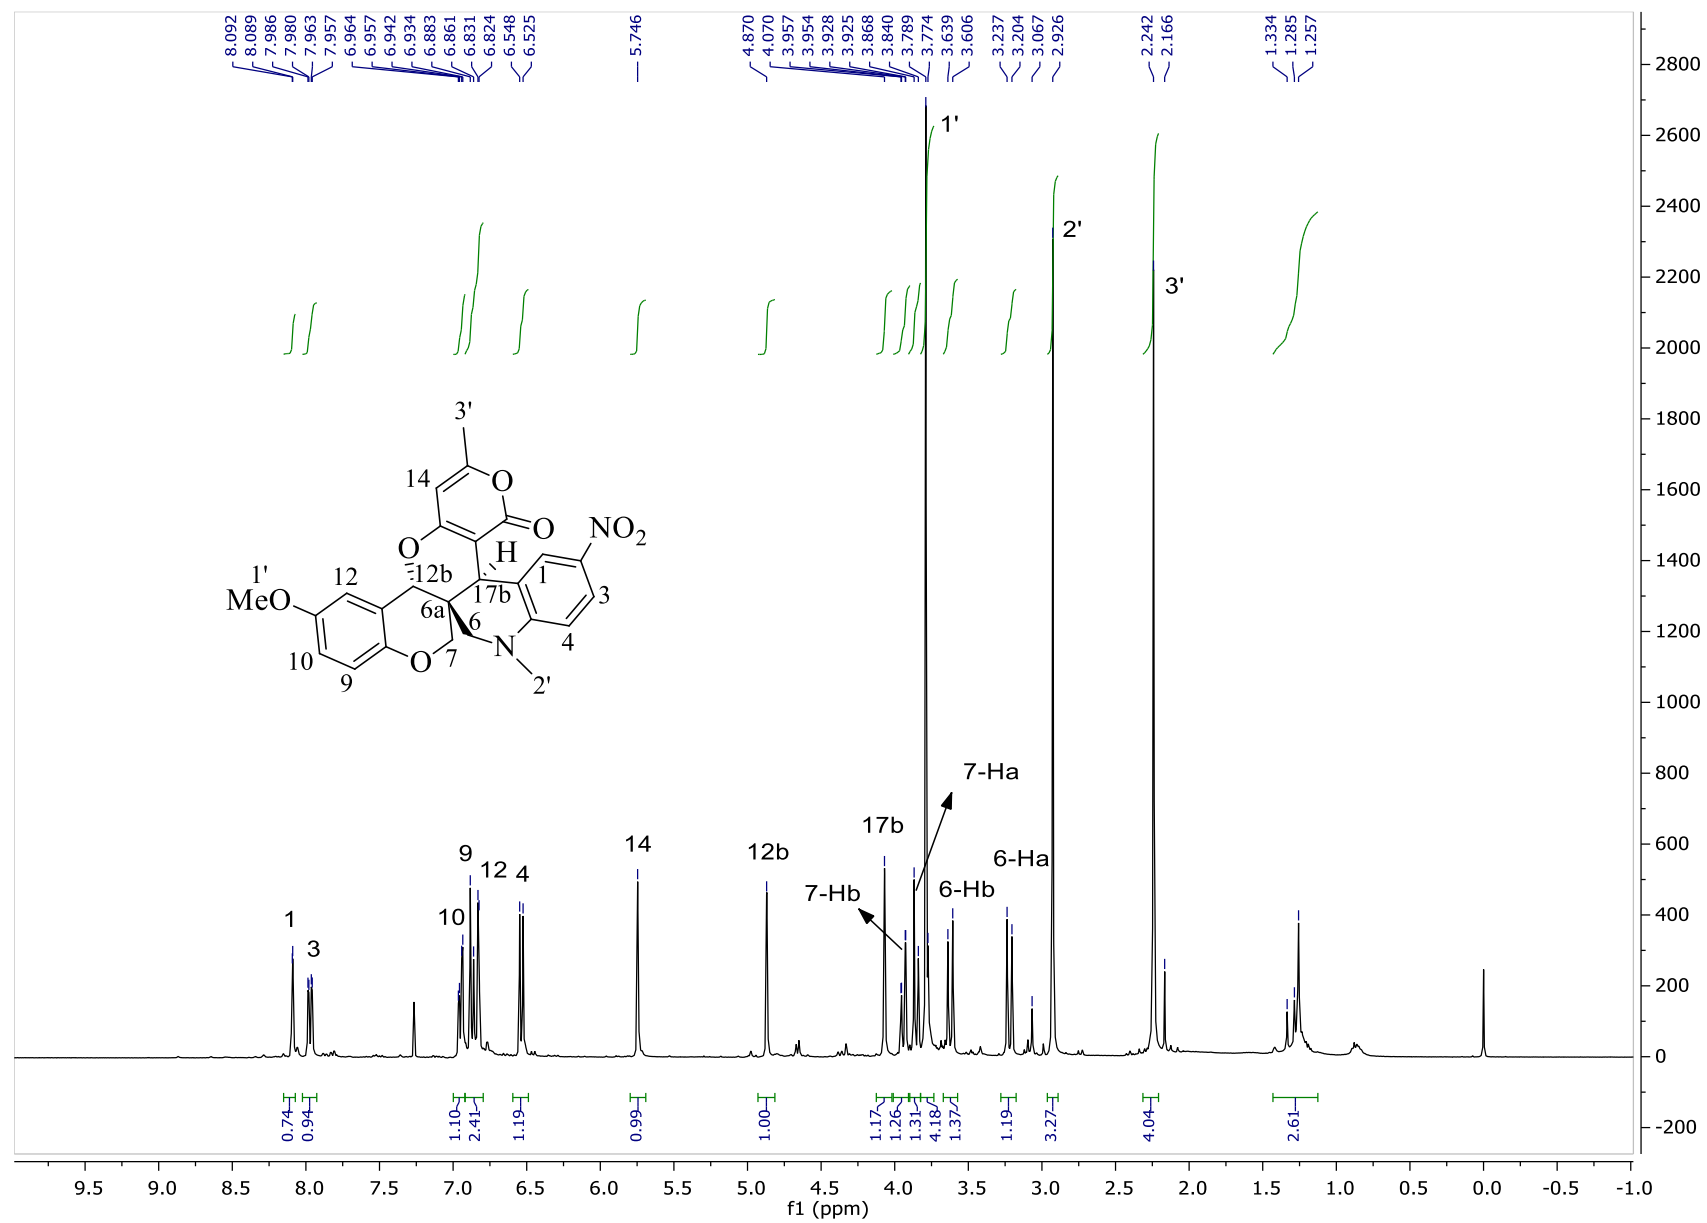

Figure S99. <sup>1</sup>H-NMR spectrum of *rac*-(6a*S*\*,12b*R*\*,17b*S*\*)-4ae in CDCl<sub>3</sub> at 400 MHz.

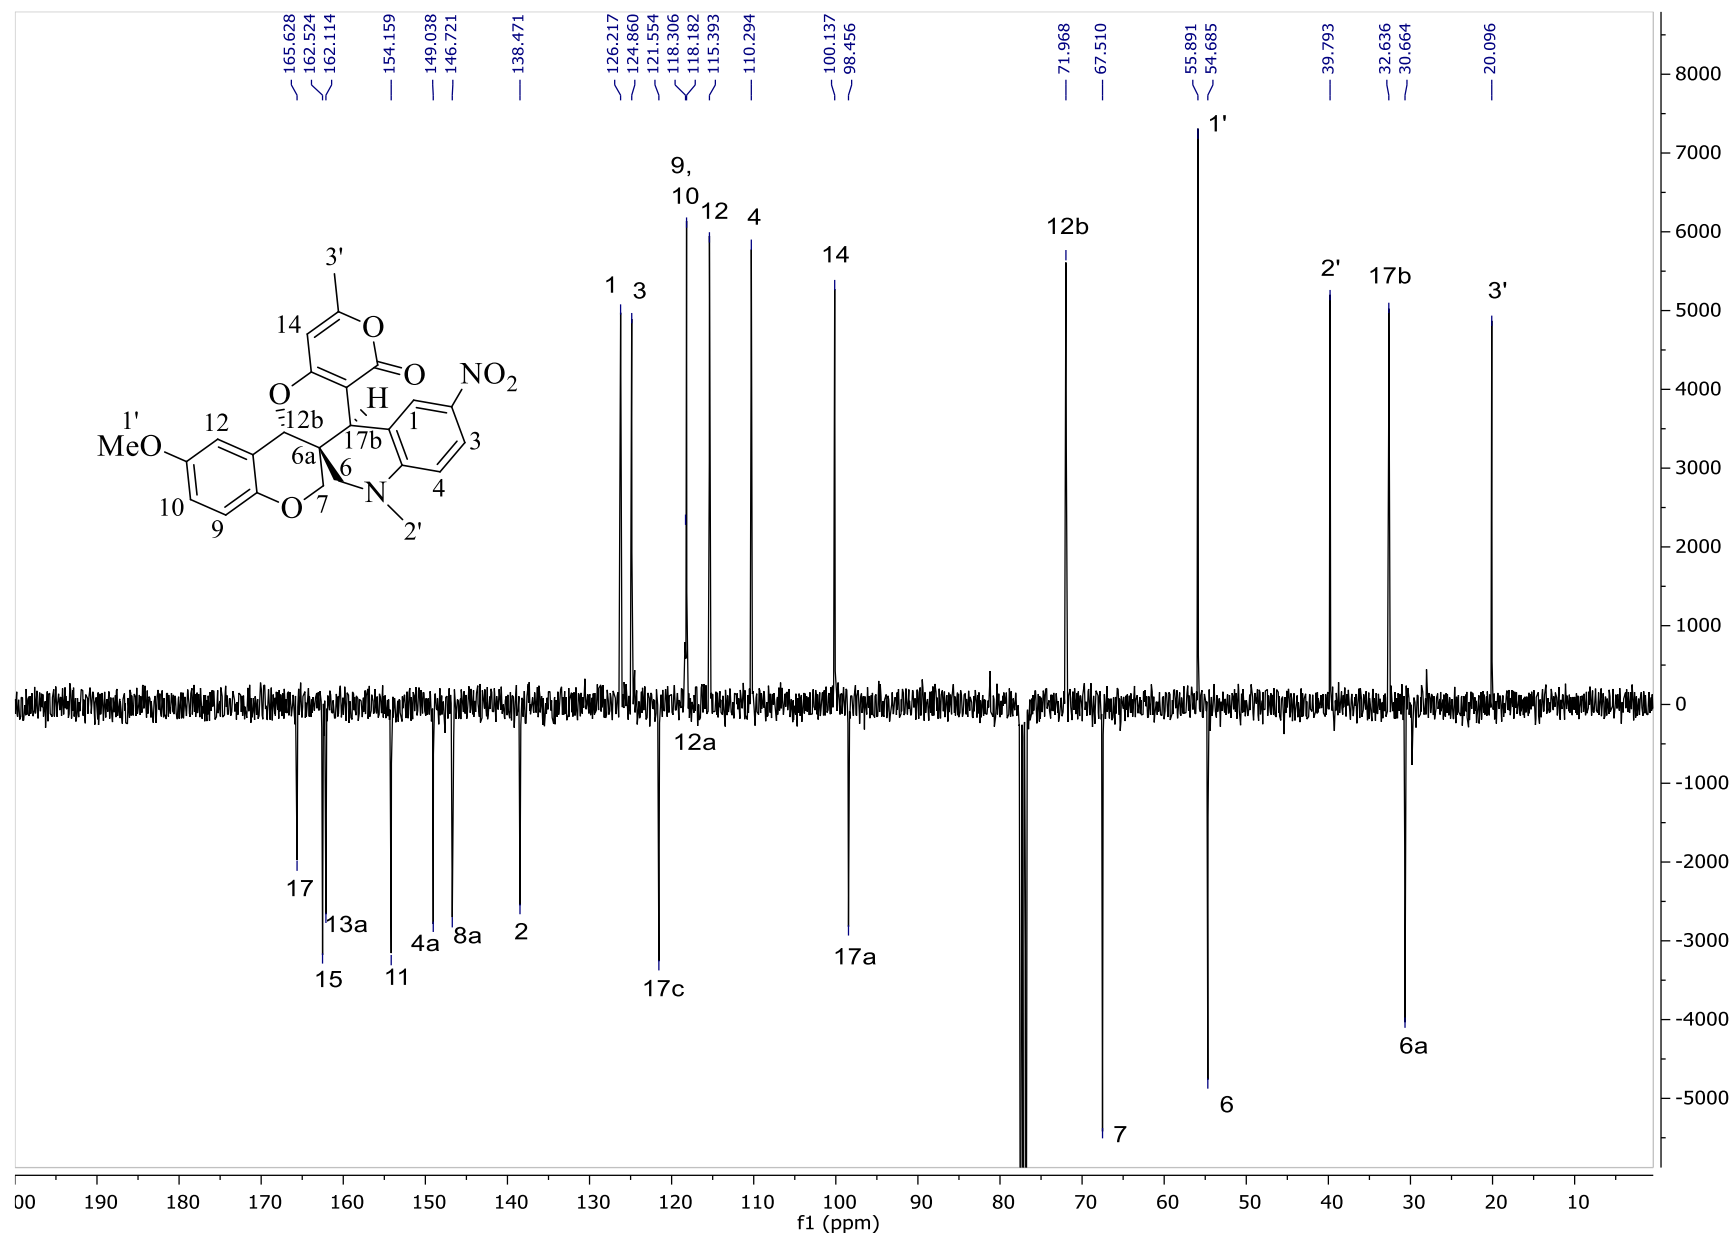

Figure S100.  $^{13}\text{C}$ -NMR spectrum of *rac*-(6a*S*\*,12b*R*\*,17b*S*\*)-4ae in  $\text{CDCl}_3$  at 100 MHz.

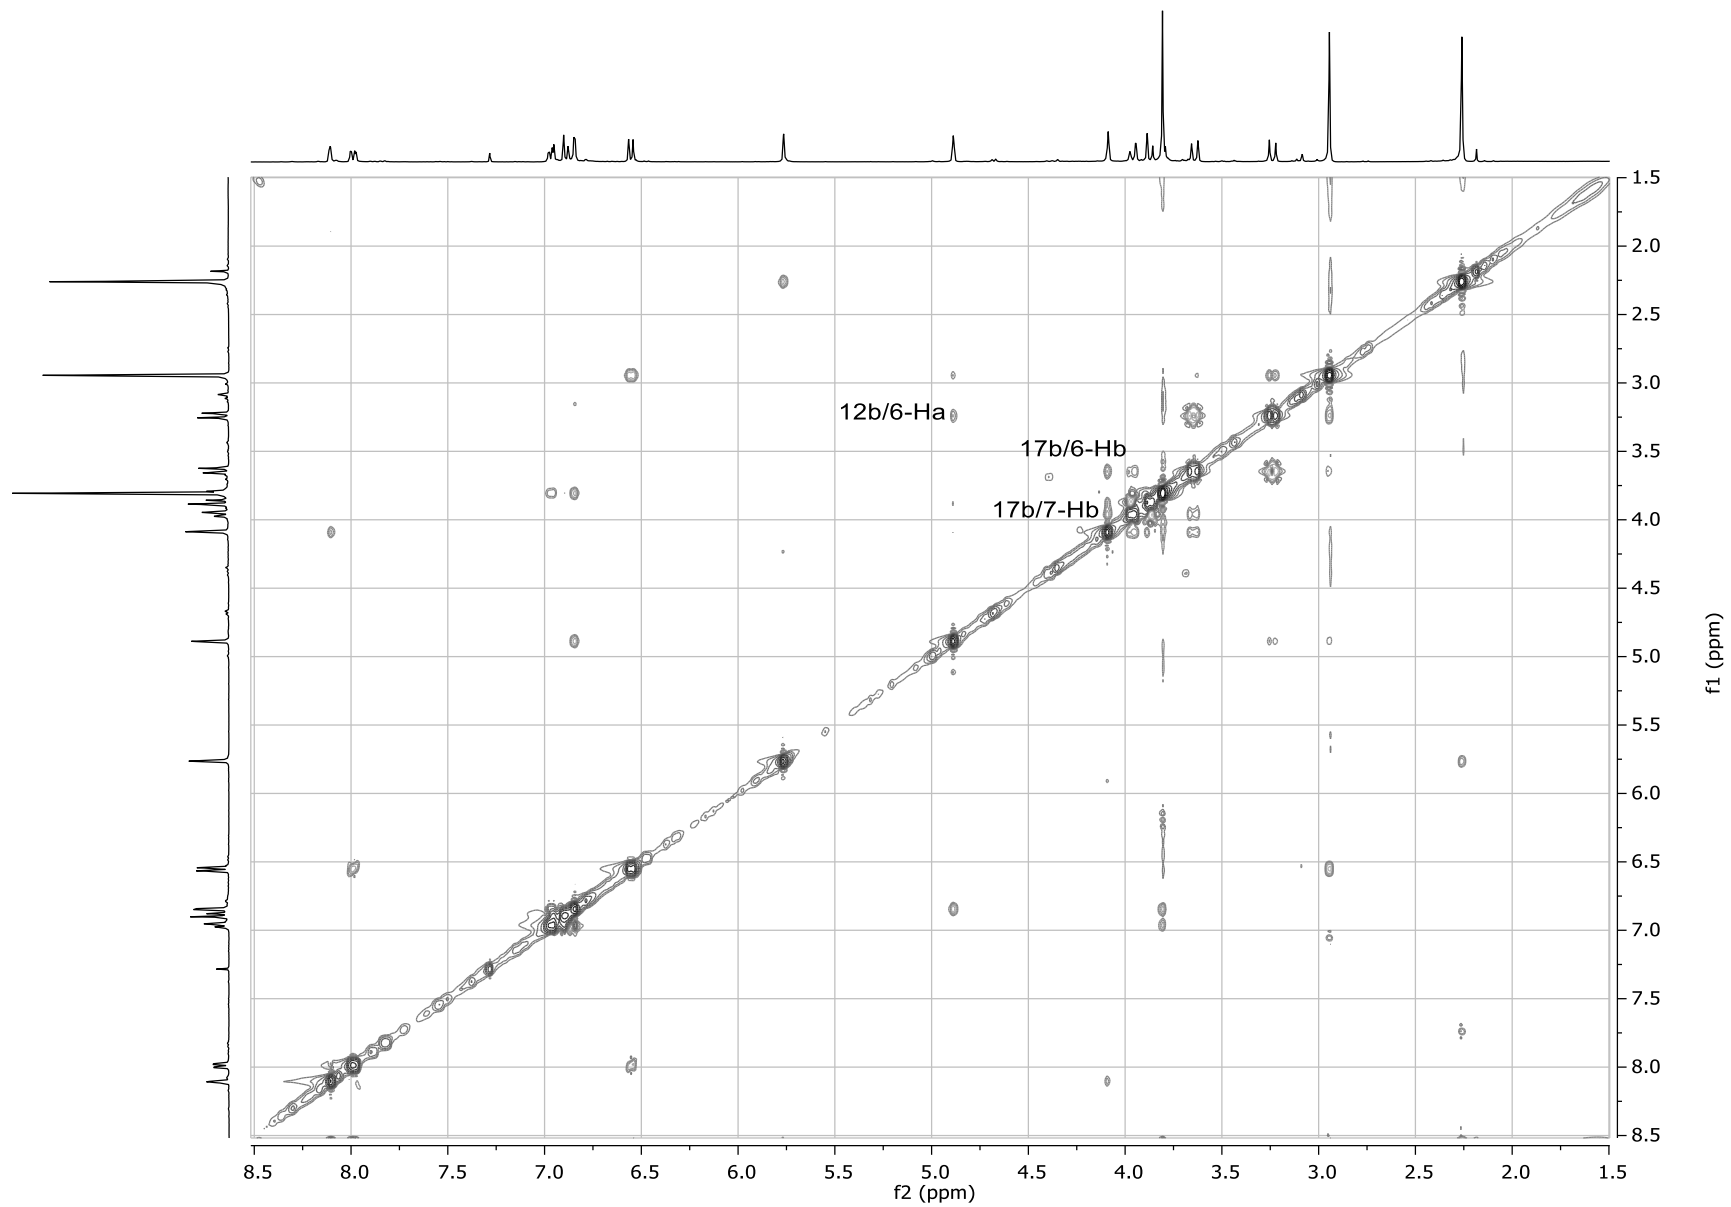

Figure S101. NOESY spectrum of *rac*-(6a*S*\*,12b*R*\*,17b*S*\*)-4ae in CDCl<sub>3</sub> at 400 MHz.

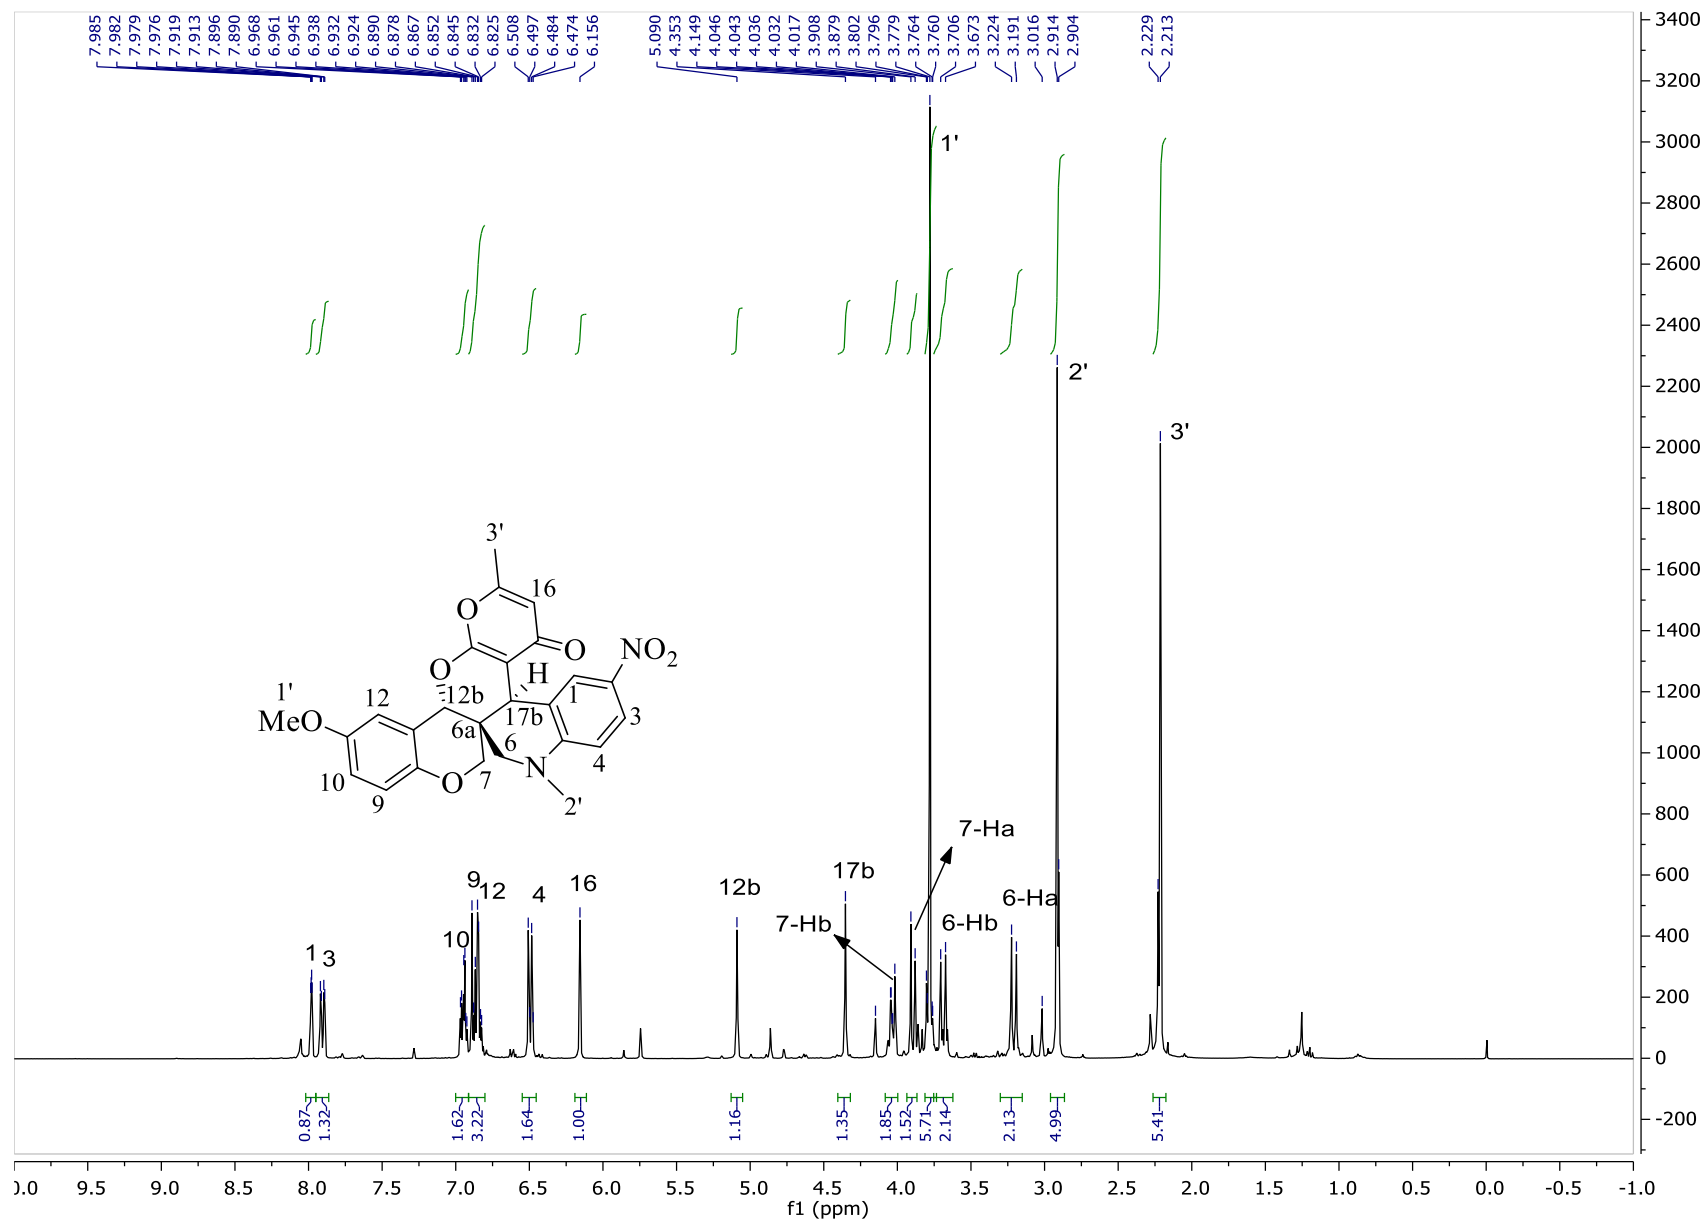

Figure S102. <sup>1</sup>H-NMR spectrum of *rac*-(6a*S*<sup>\*</sup>,12b*R*<sup>\*</sup>,17b*S*<sup>\*</sup>)-**6ae** in CDCl<sub>3</sub> at 400 MHz.

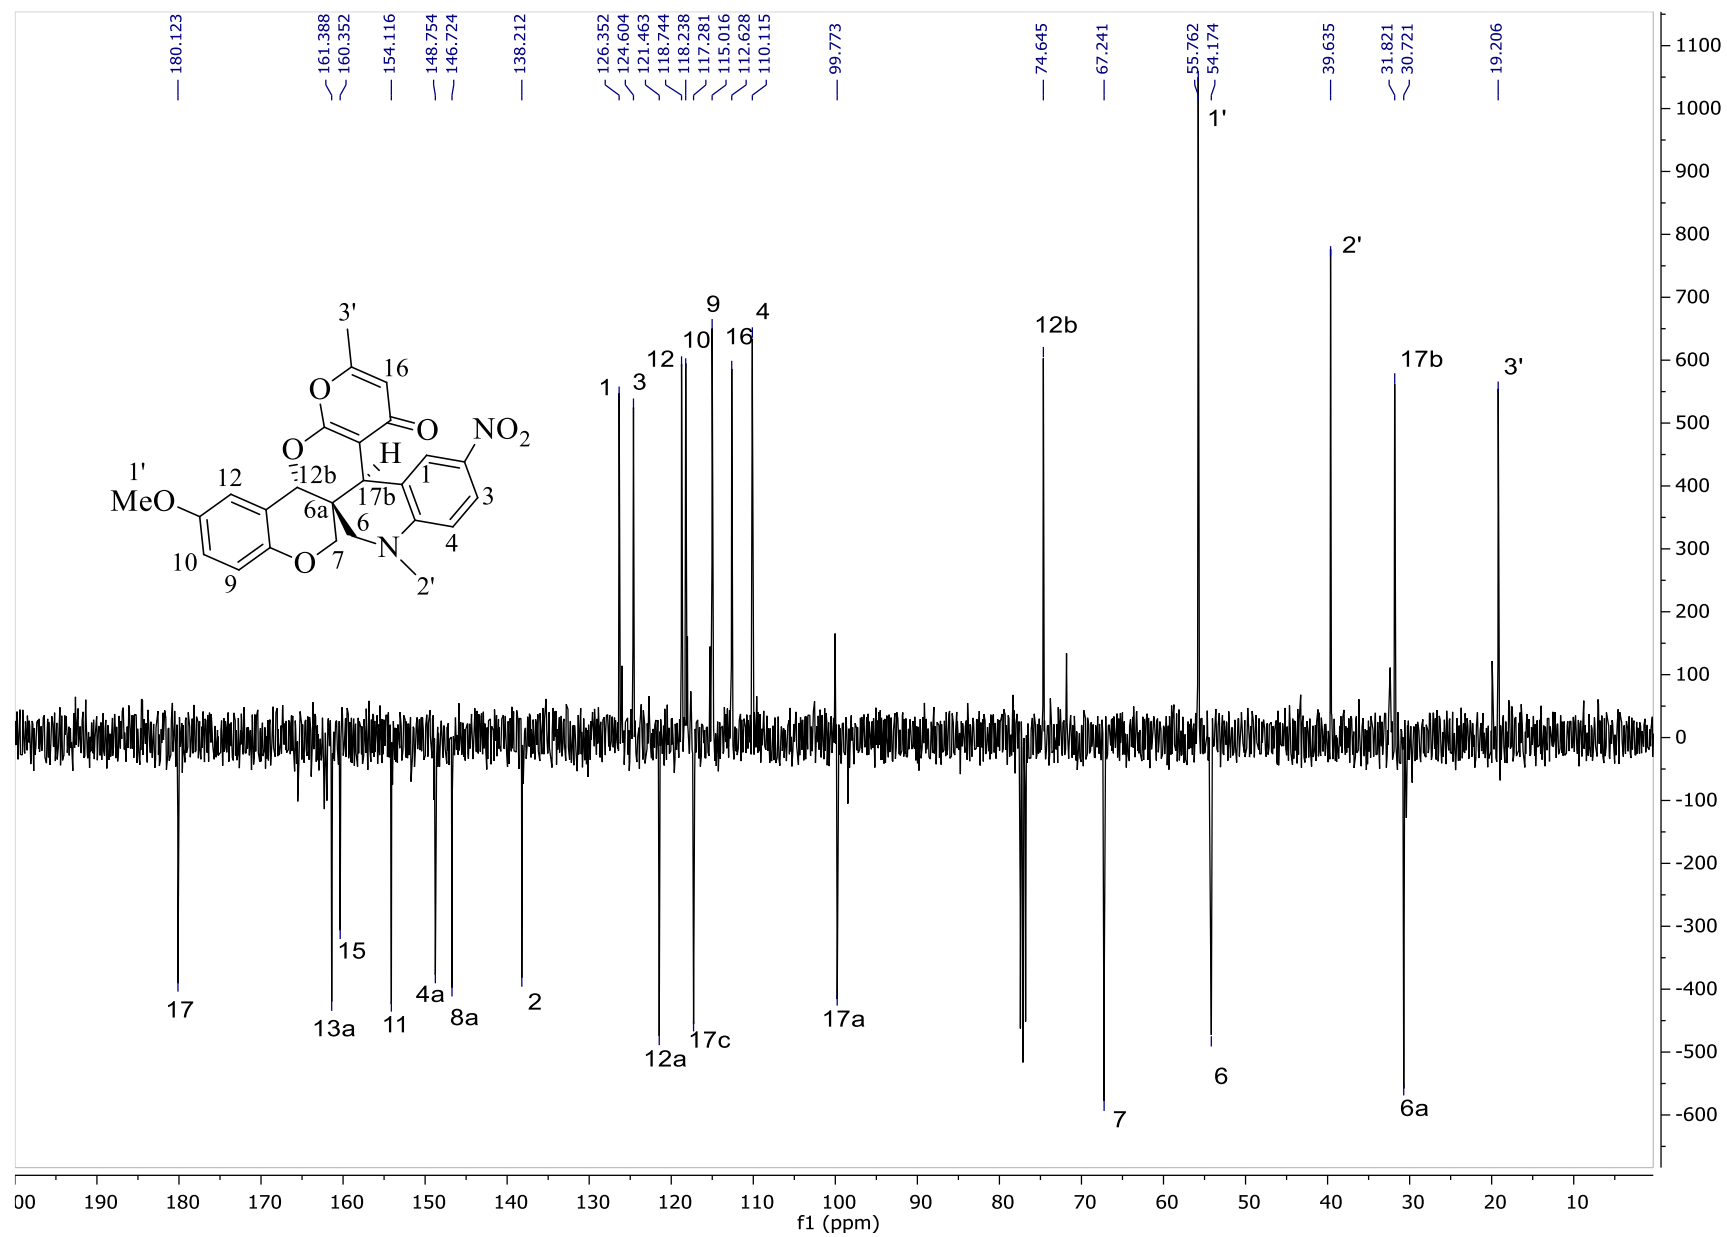

Figure S103. <sup>13</sup>C-NMR spectrum of *rac*-(6a*S*\*,12b*R*\*,17b*S*\*)-6ae in CDCl<sub>3</sub> at 100 MHz.

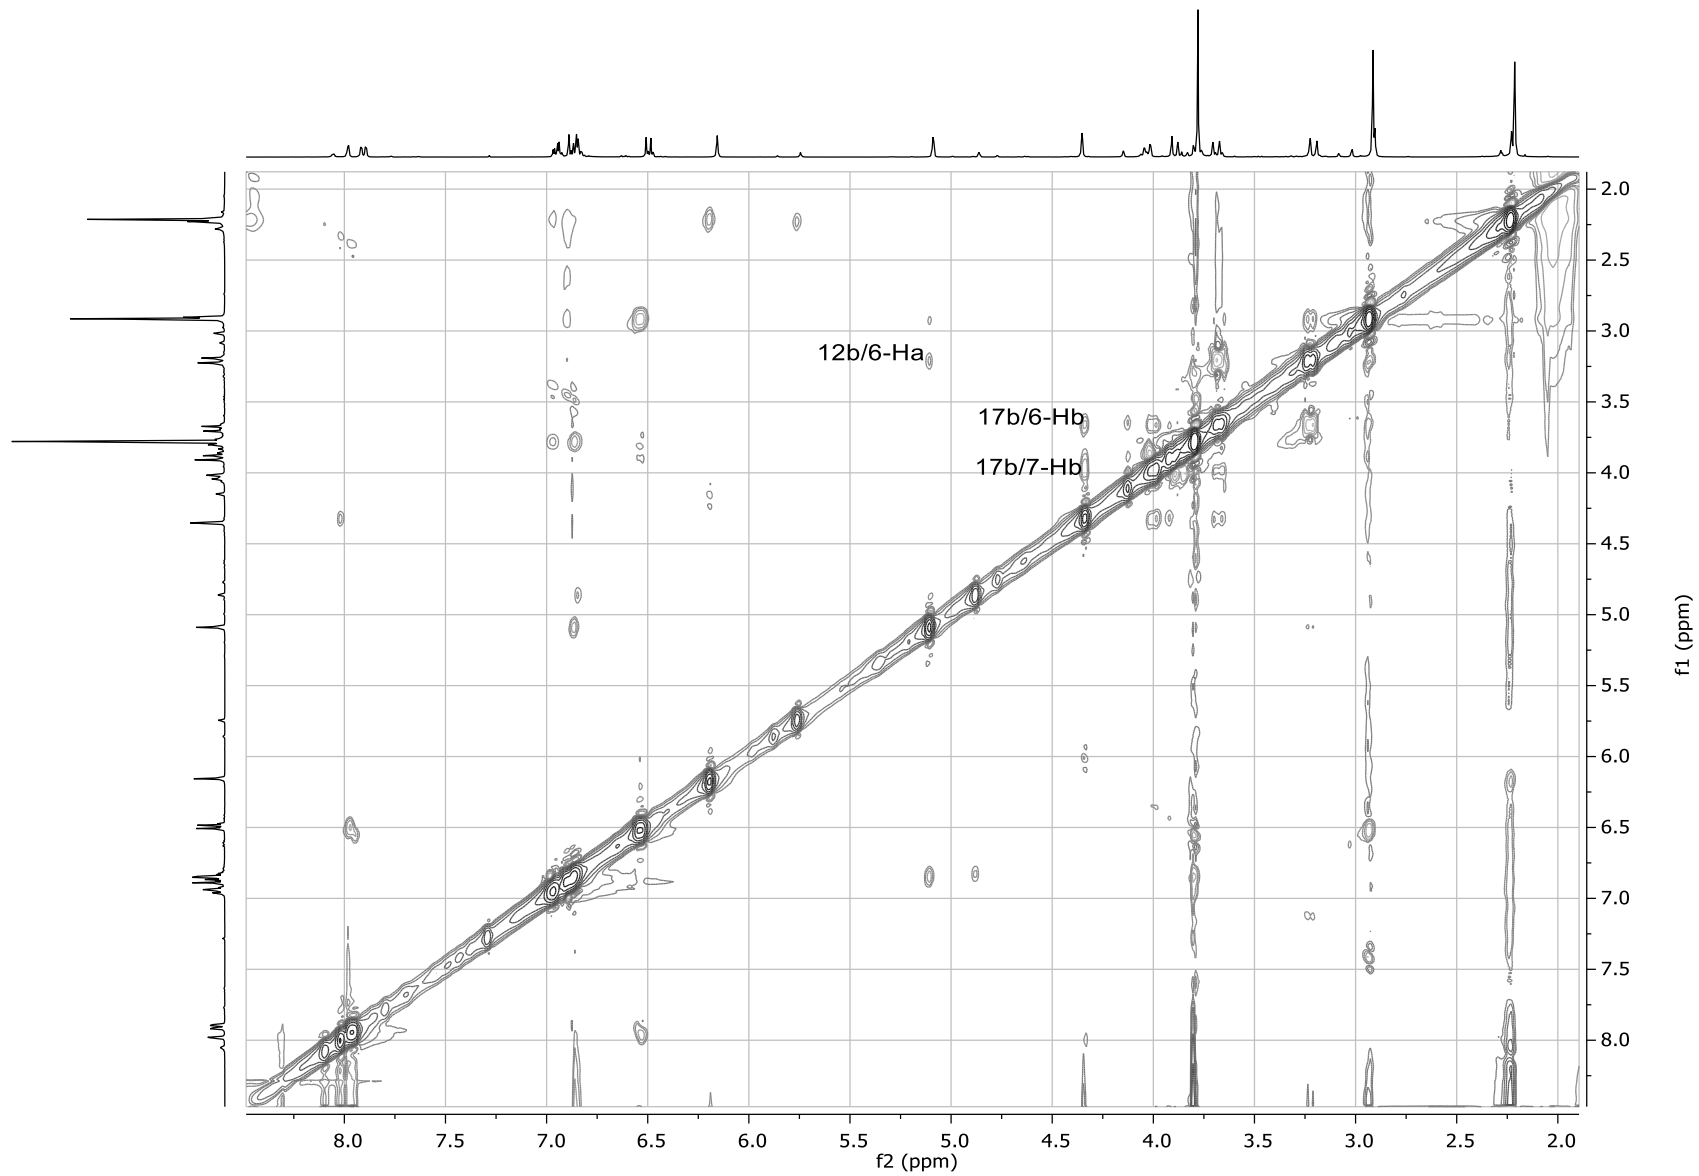

Figure S104. NOESY spectrum of *rac*-(6a*S*\*,12b*R*\*,17b*S*\*)-6ae in CDCl<sub>3</sub> at 400 MHz.

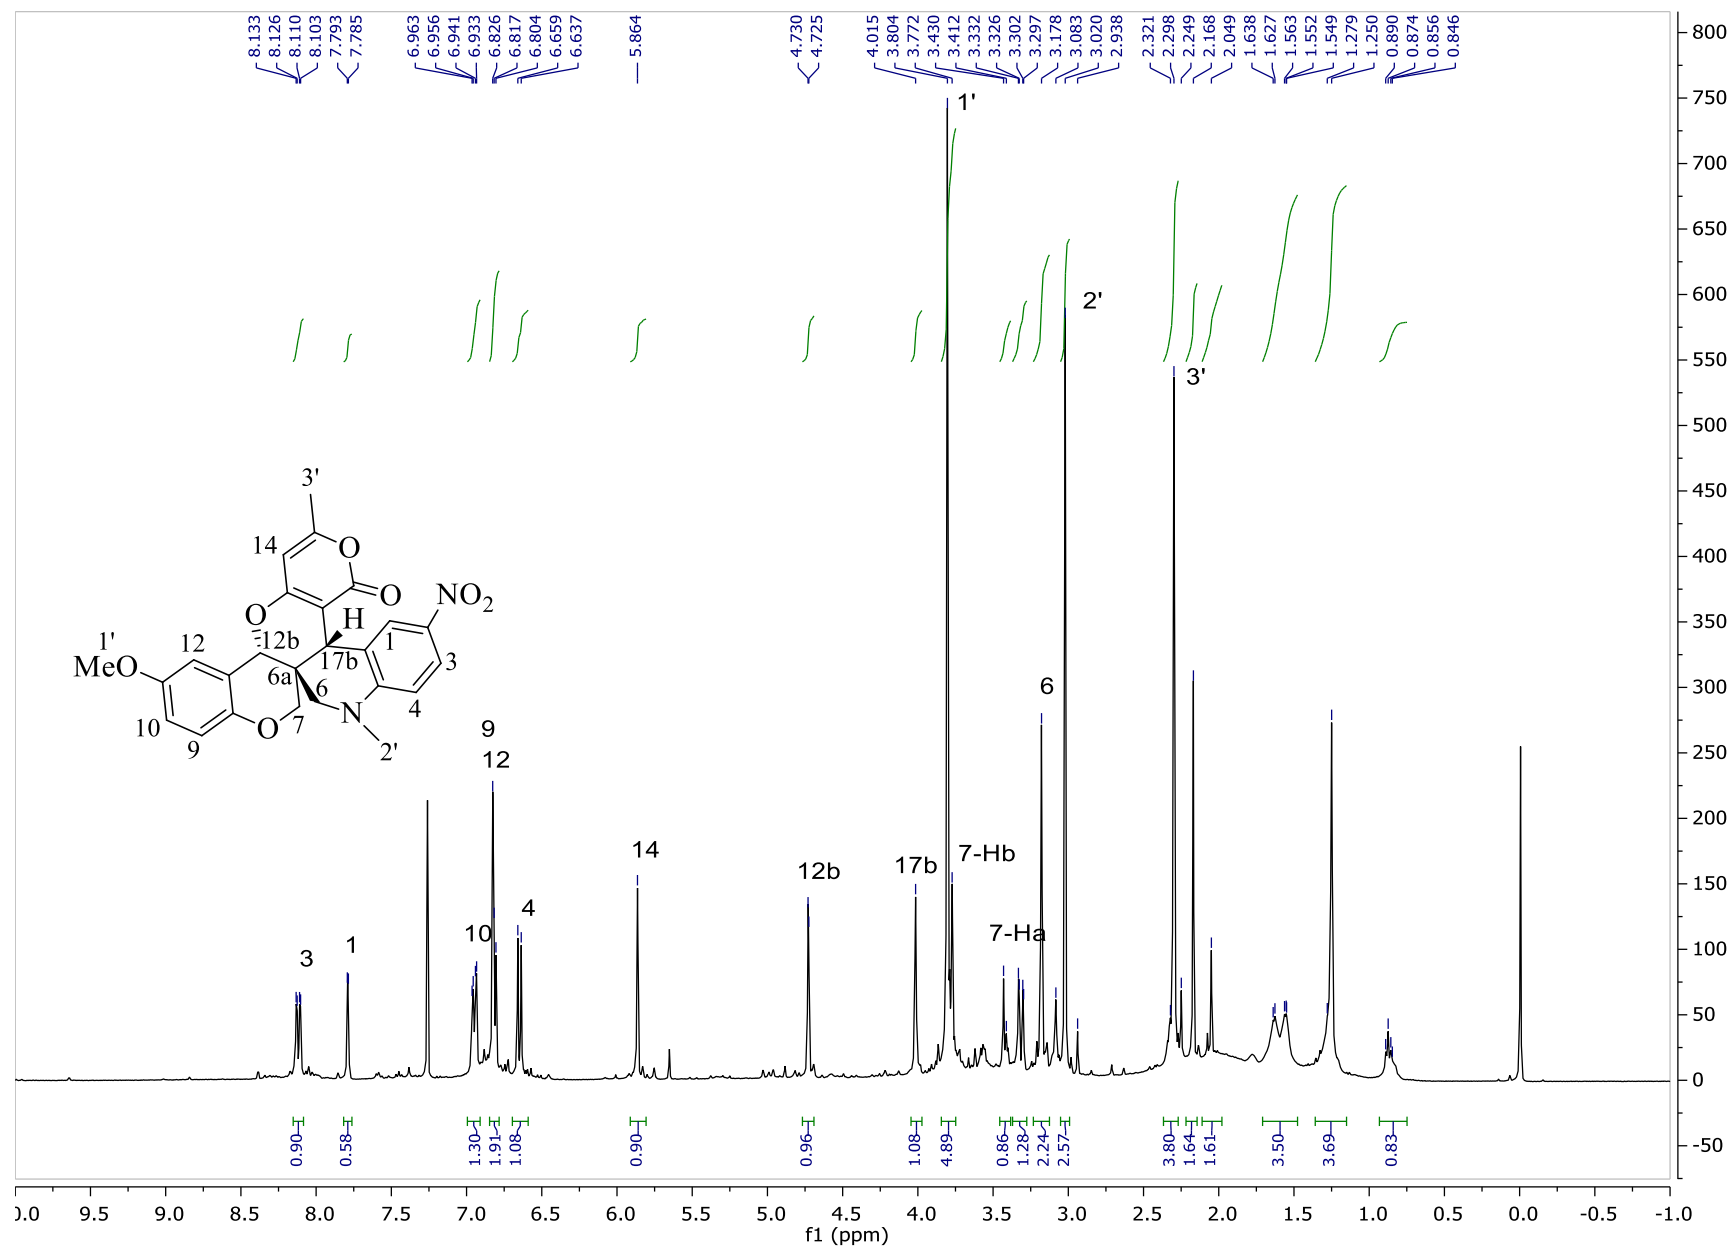

Figure S105. <sup>1</sup>H-NMR spectrum of *rac*-(6a*S*\*,12b*R*\*,17b*R*\*)-5ae in CDCl<sub>3</sub> at 400 MHz.

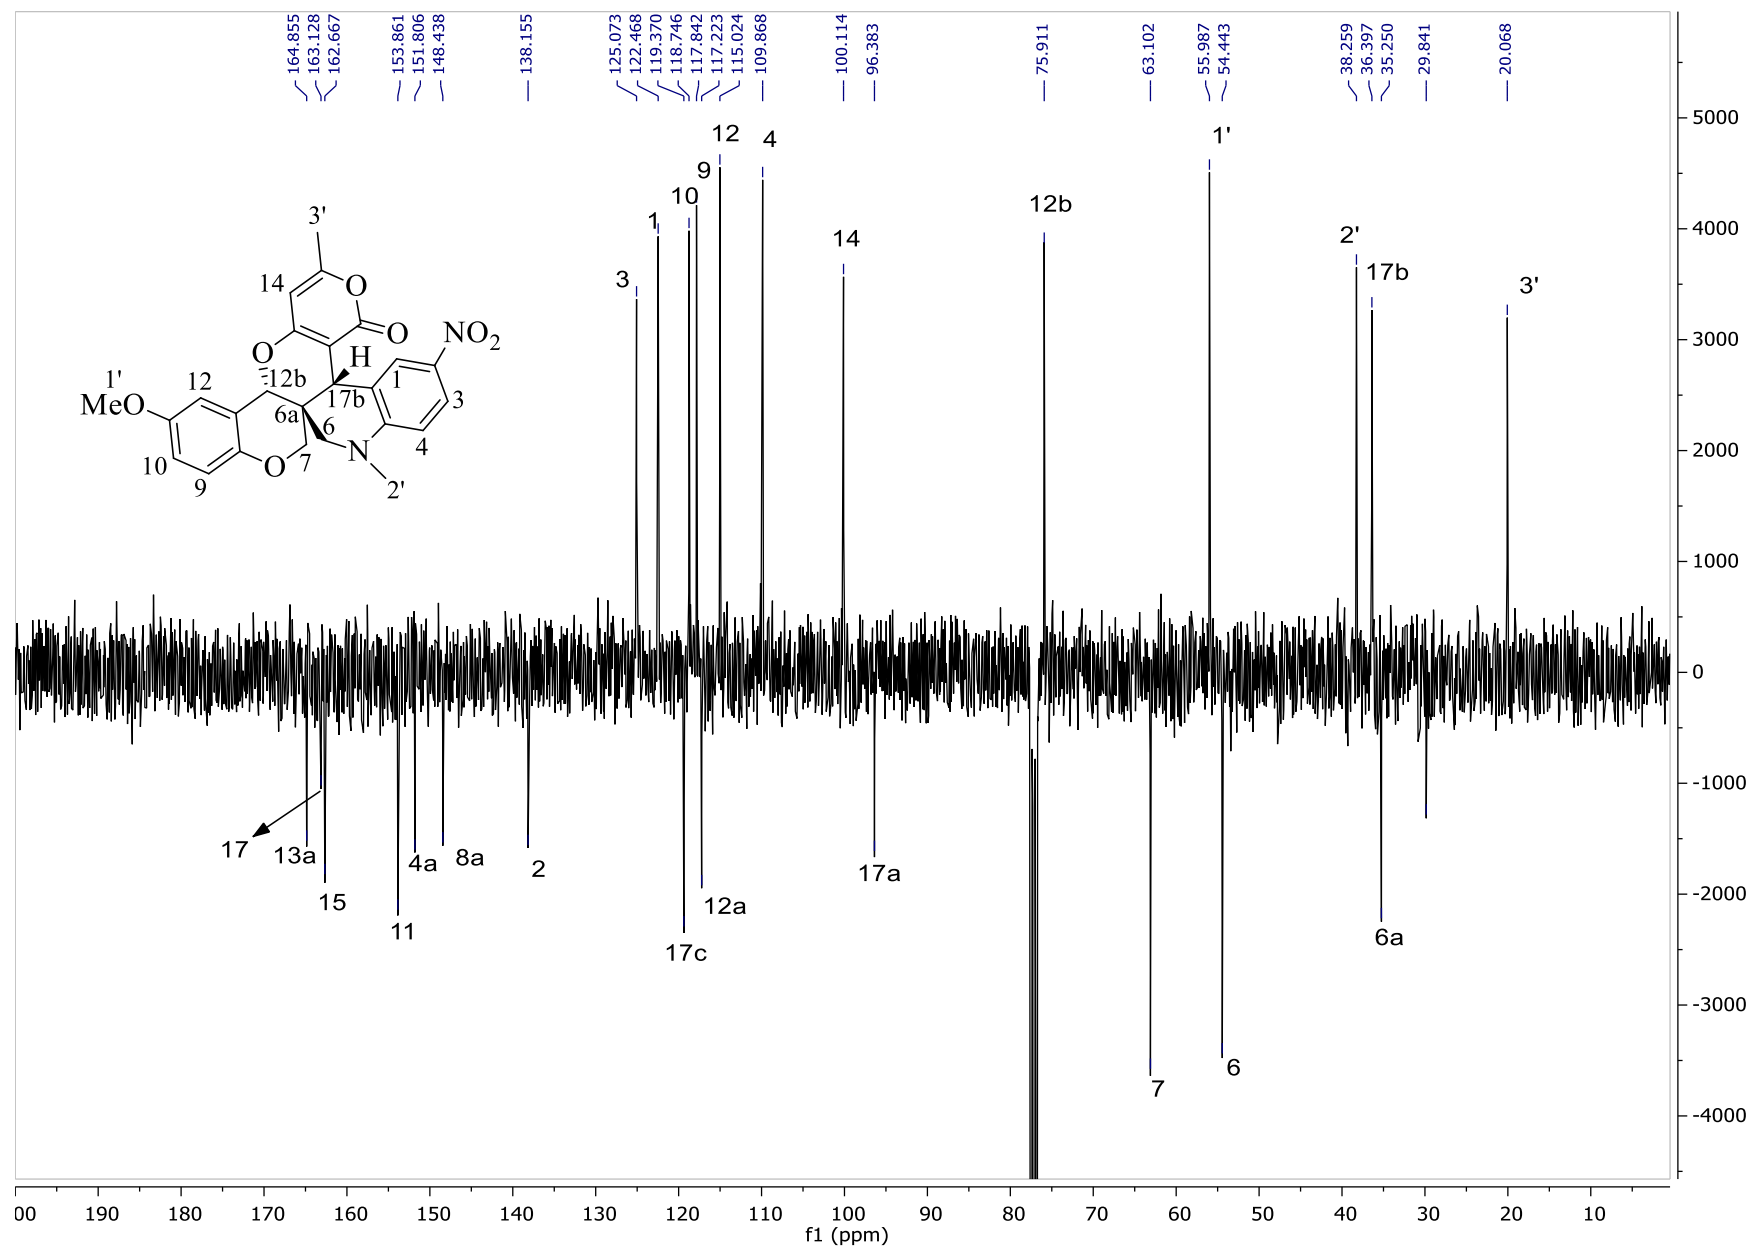

Figure S106.  $^{13}\text{C}$ -NMR spectrum of *rac*-(6a*S*<sup>\*</sup>,12b*R*<sup>\*</sup>,17b*R*<sup>\*</sup>)-**5ae** in  $\text{CDCl}_3$  at 100 MHz.

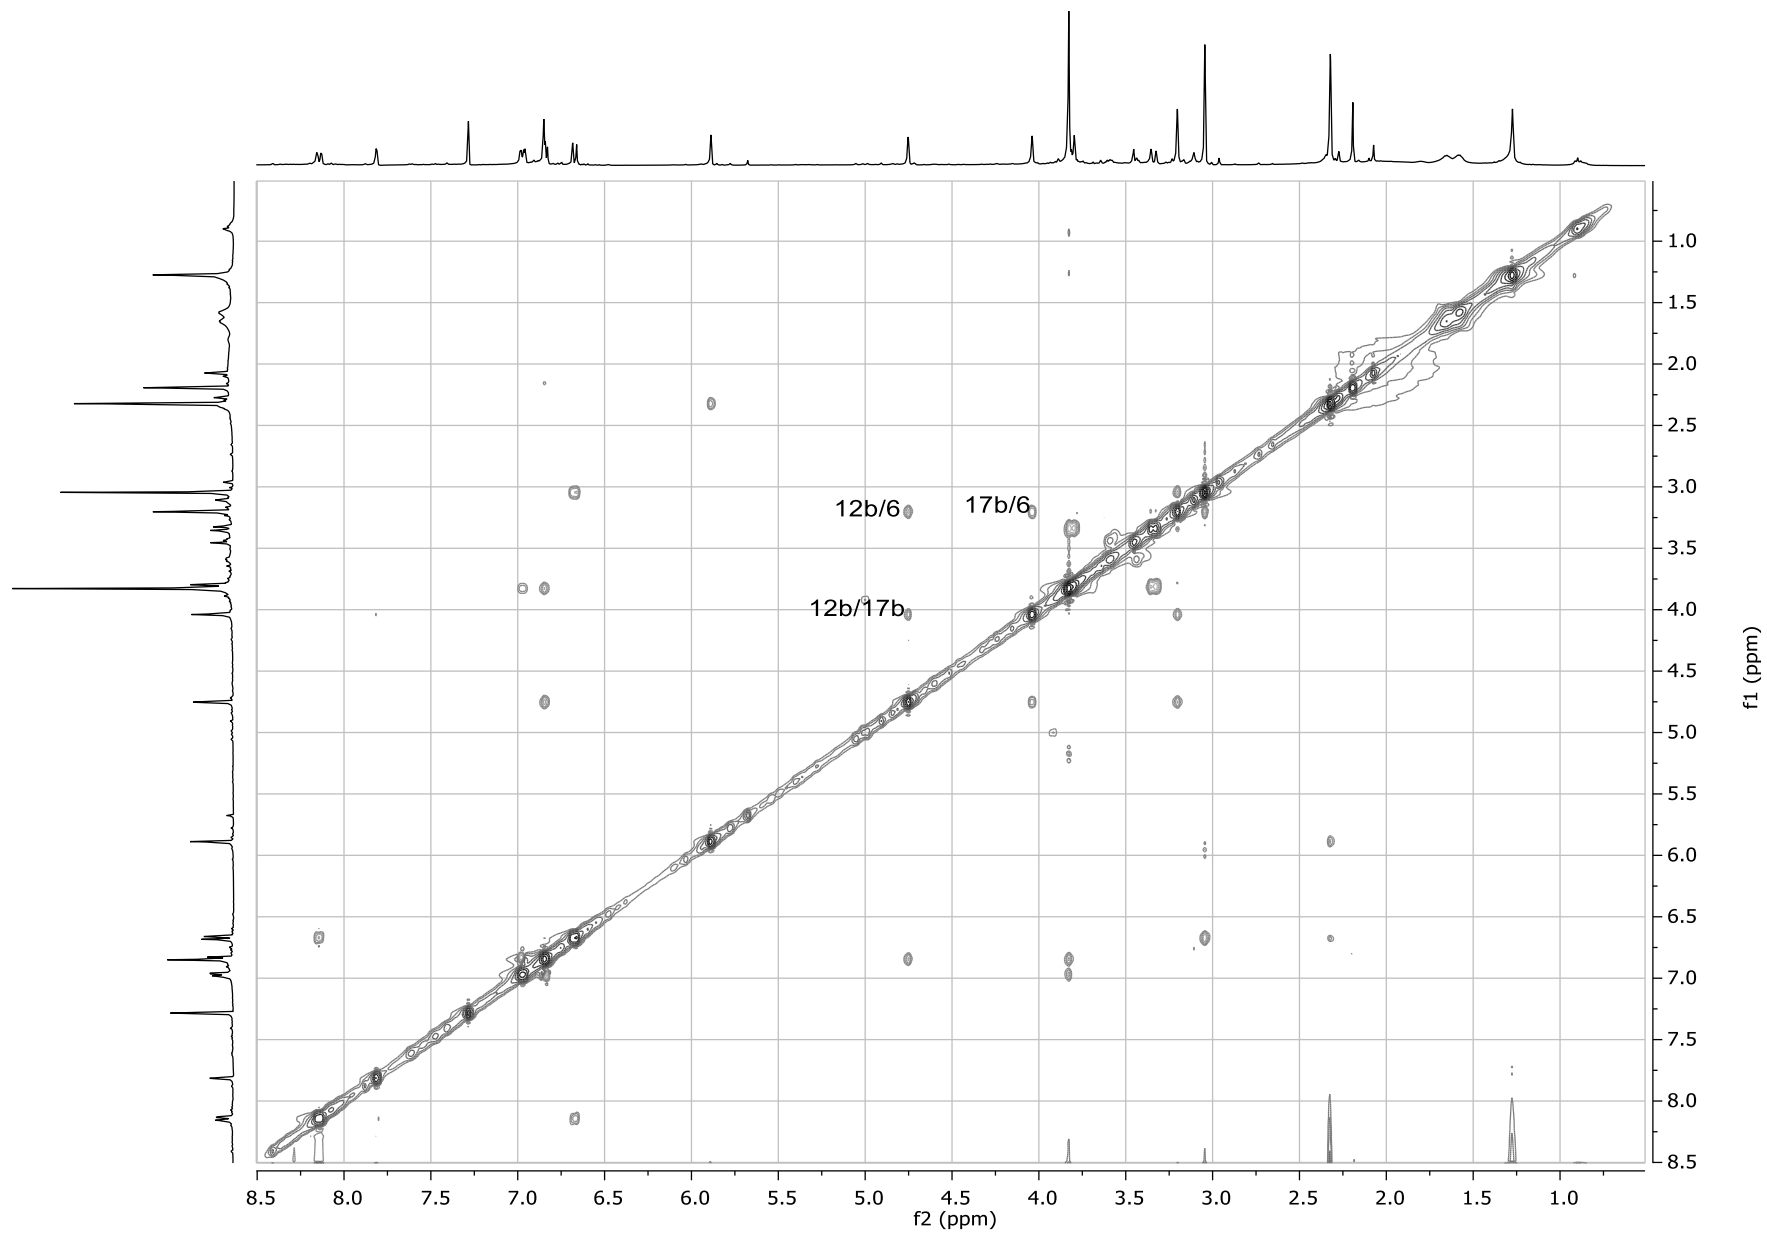

Figure S107. NOESY spectrum of *rac*-(6a*S*\*,12b*R*\*,17b*R*\*)-5ae in CDCl<sub>3</sub> at 400 MHz.

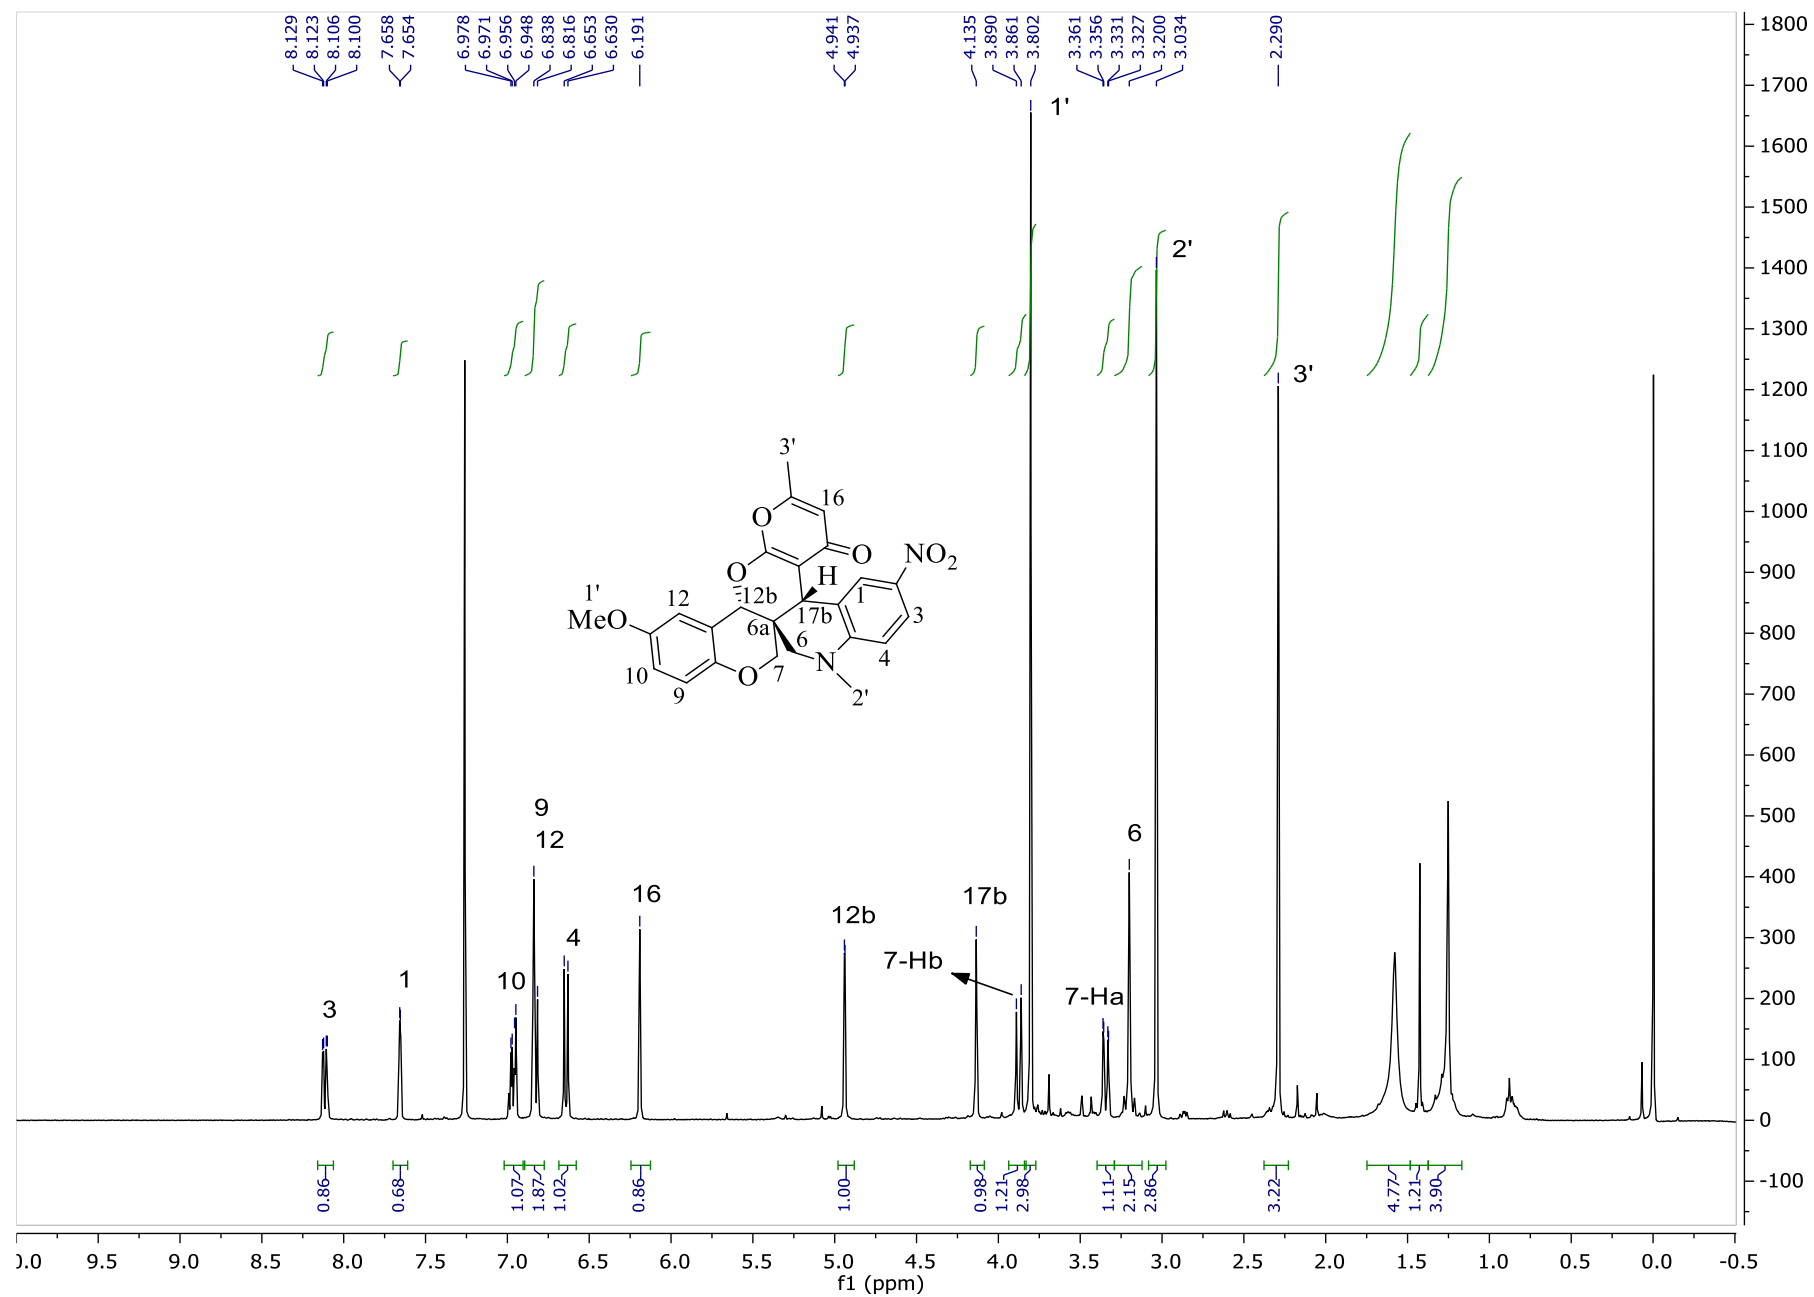

Figure S108. <sup>1</sup>H-NMR spectrum of *rac*-(6a*S*\*,12b*R*\*,17b*R*\*)-7ae in CDCl<sub>3</sub> at 400 MHz.

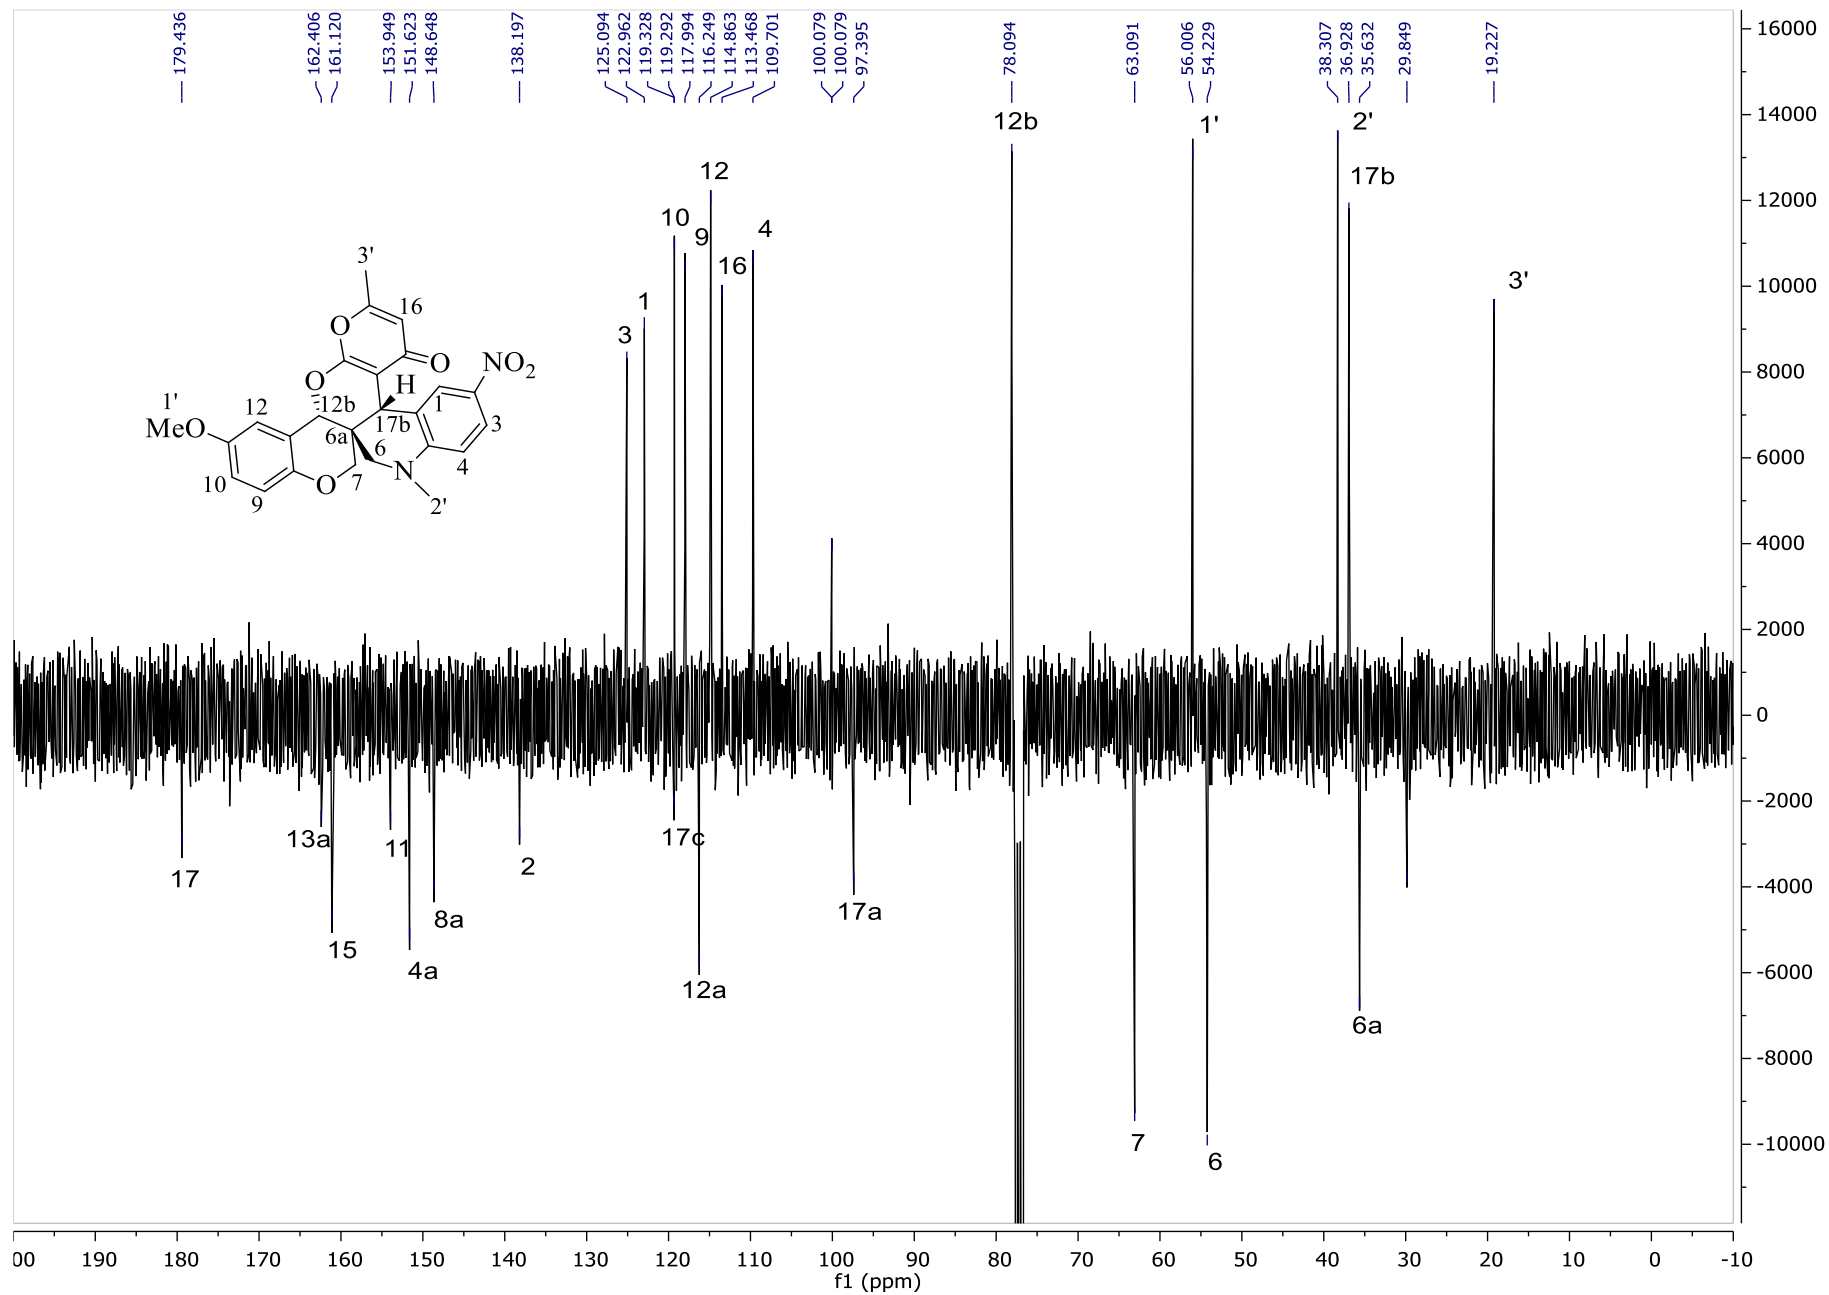

Figure S109. <sup>1</sup>H-NMR spectrum of *rac*-(6a*S*\*,12b*R*\*,17b*R*\*)-7ae in CDCl<sub>3</sub> at 90 MHz.

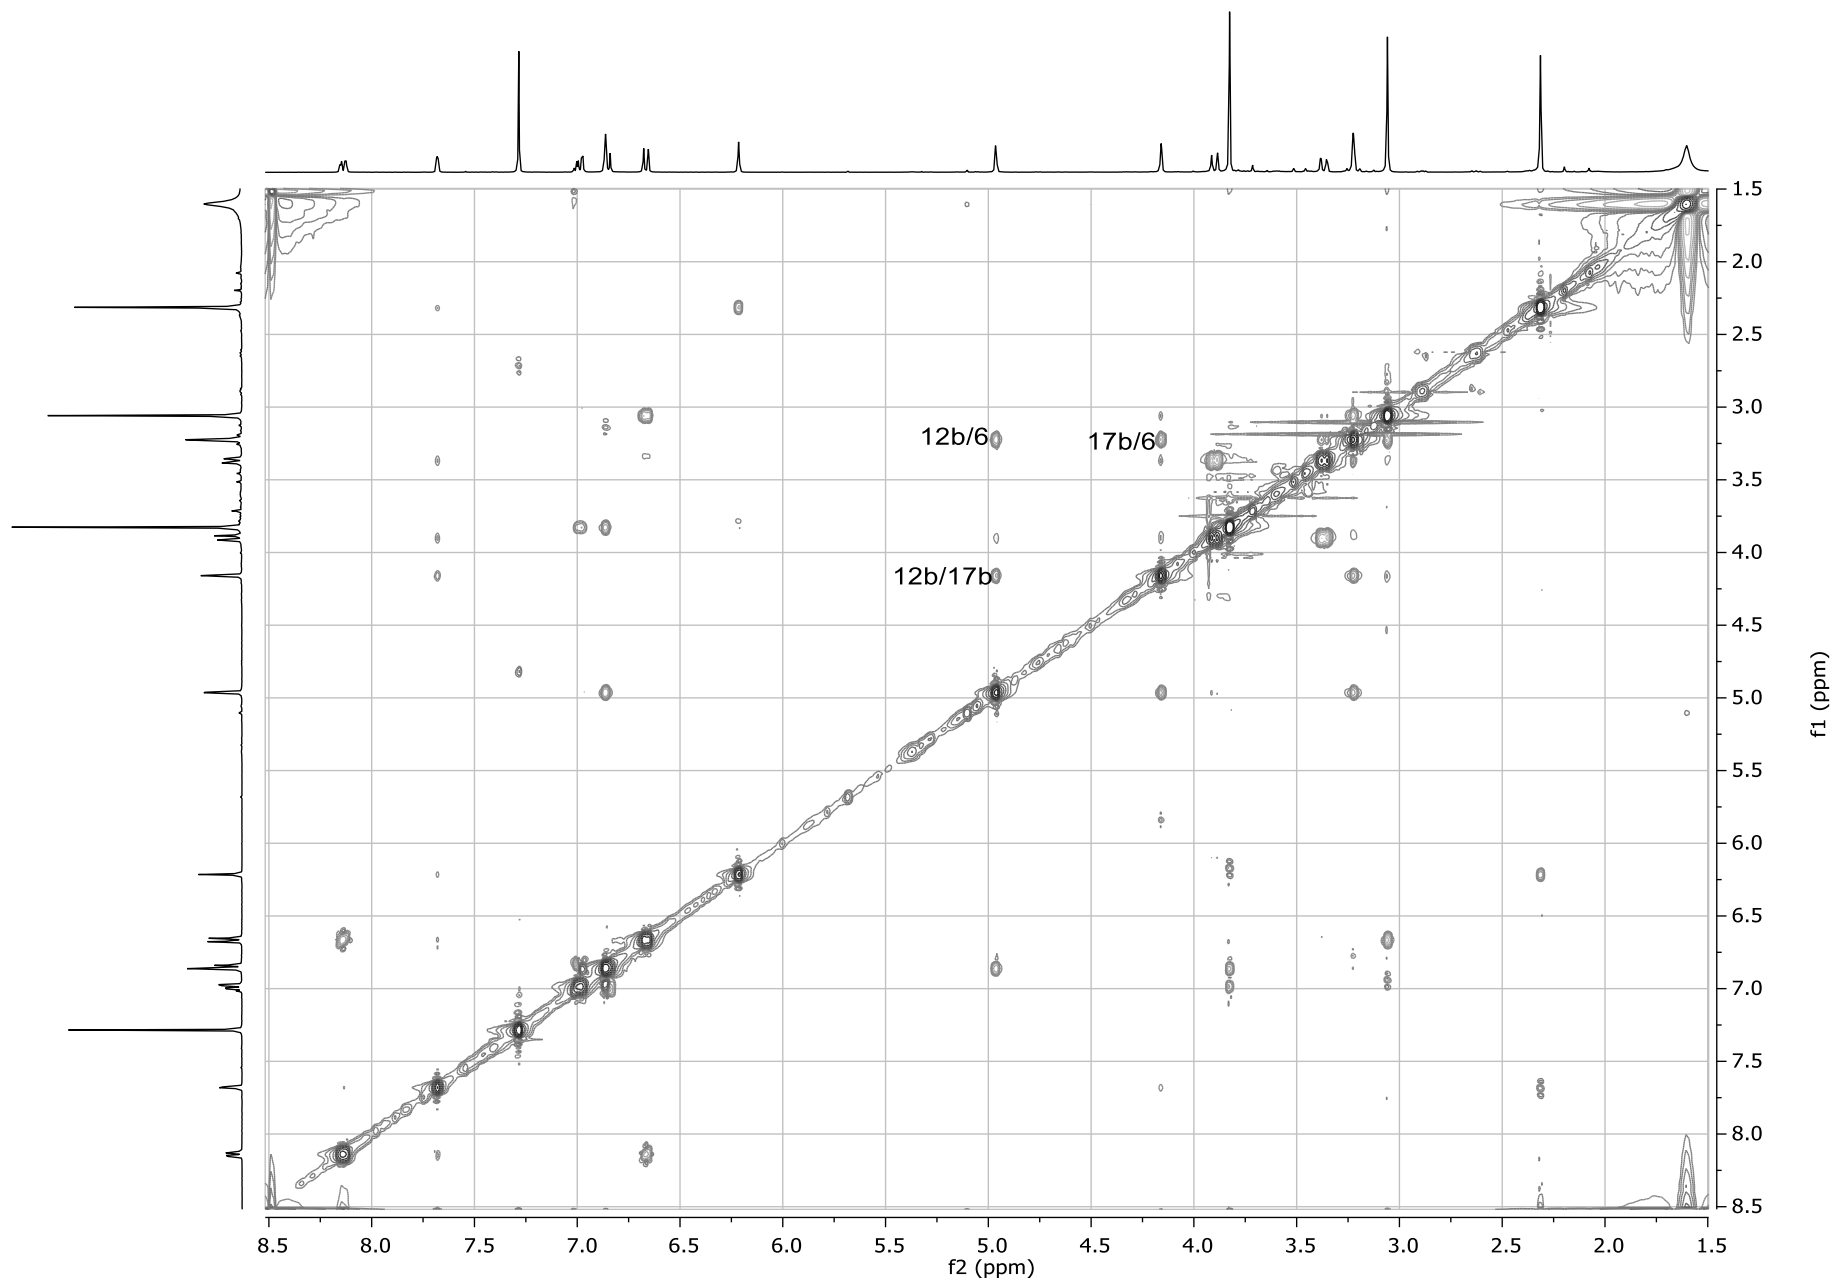

Figure S110. NOESY spectrum of *rac*-(6a*S*\*,12b*R*\*,17b*R*\*)-7ae in CDCl<sub>3</sub> at 400 MHz.

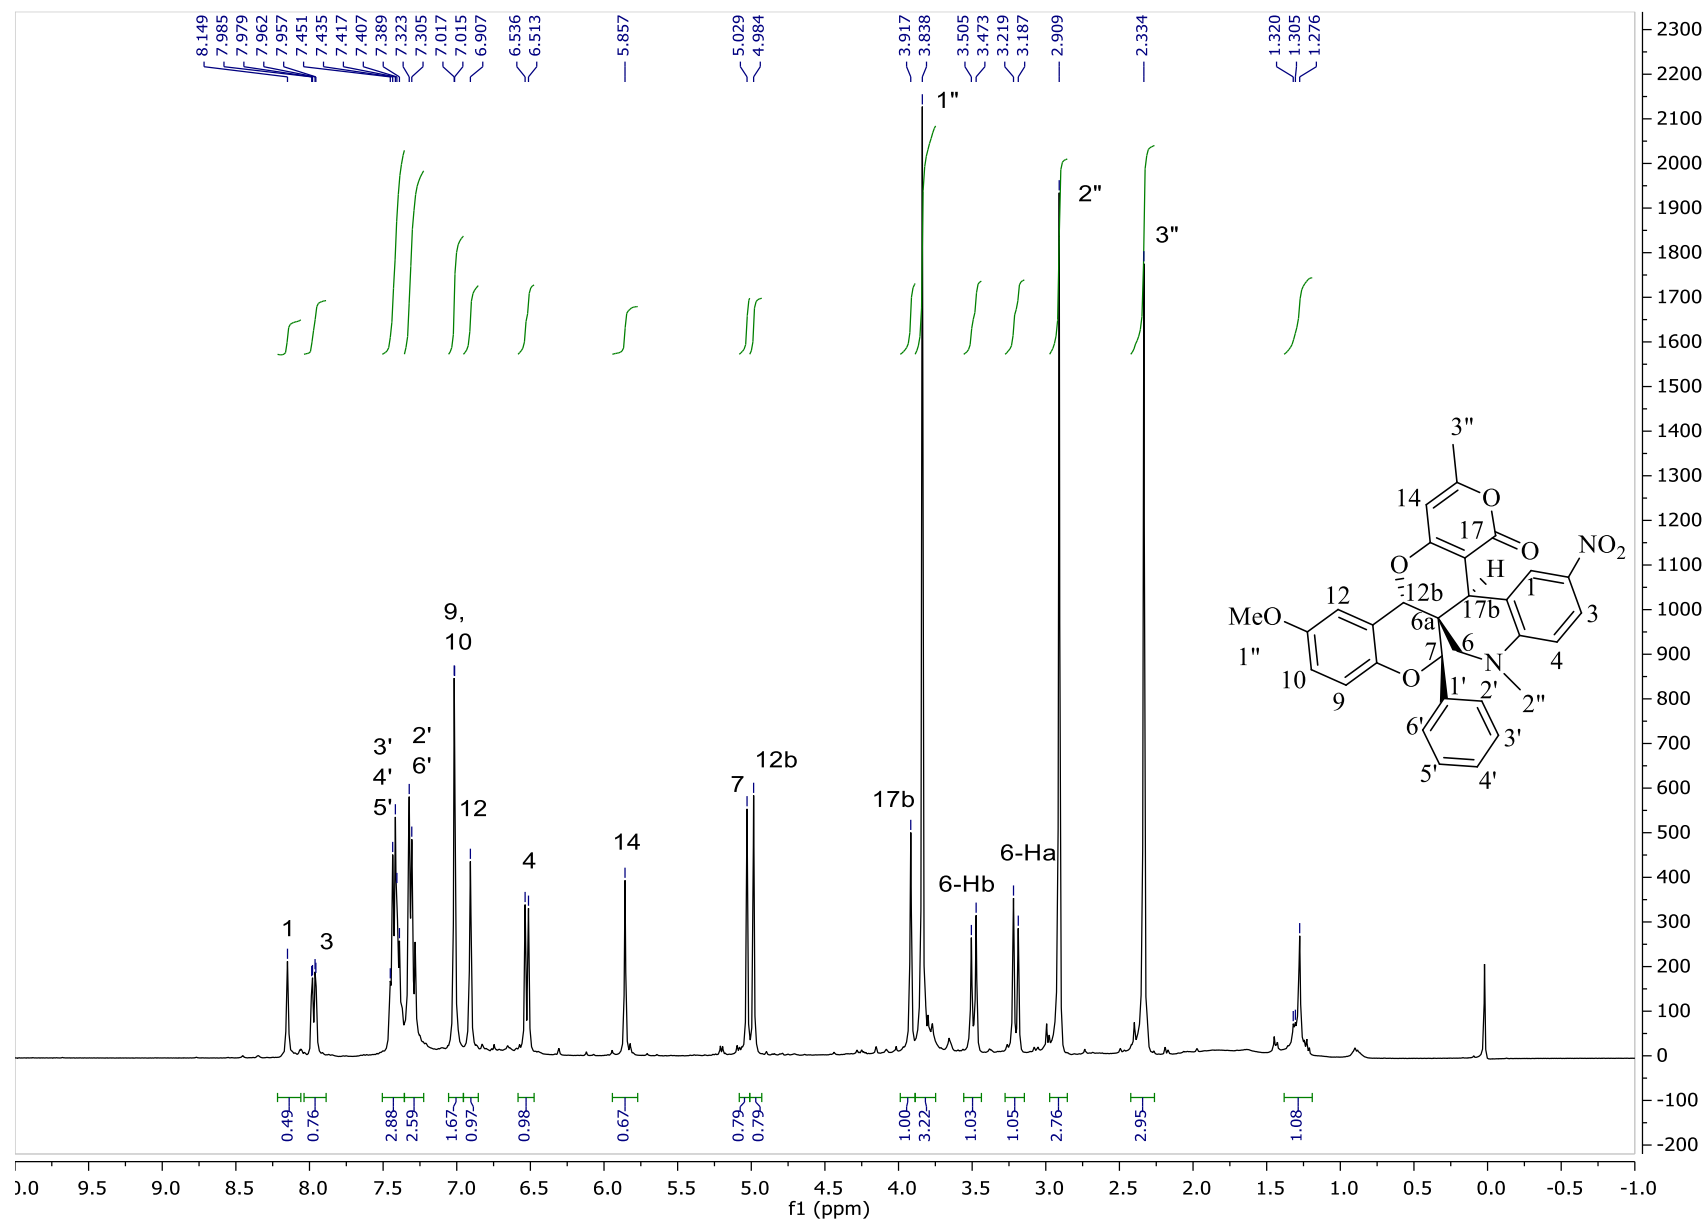

Figure S111. <sup>1</sup>H-NMR spectrum of (6a*S*,7*R*,12b*R*,17b*S*)-**4be** in CDCl<sub>3</sub> at 400 MHz.



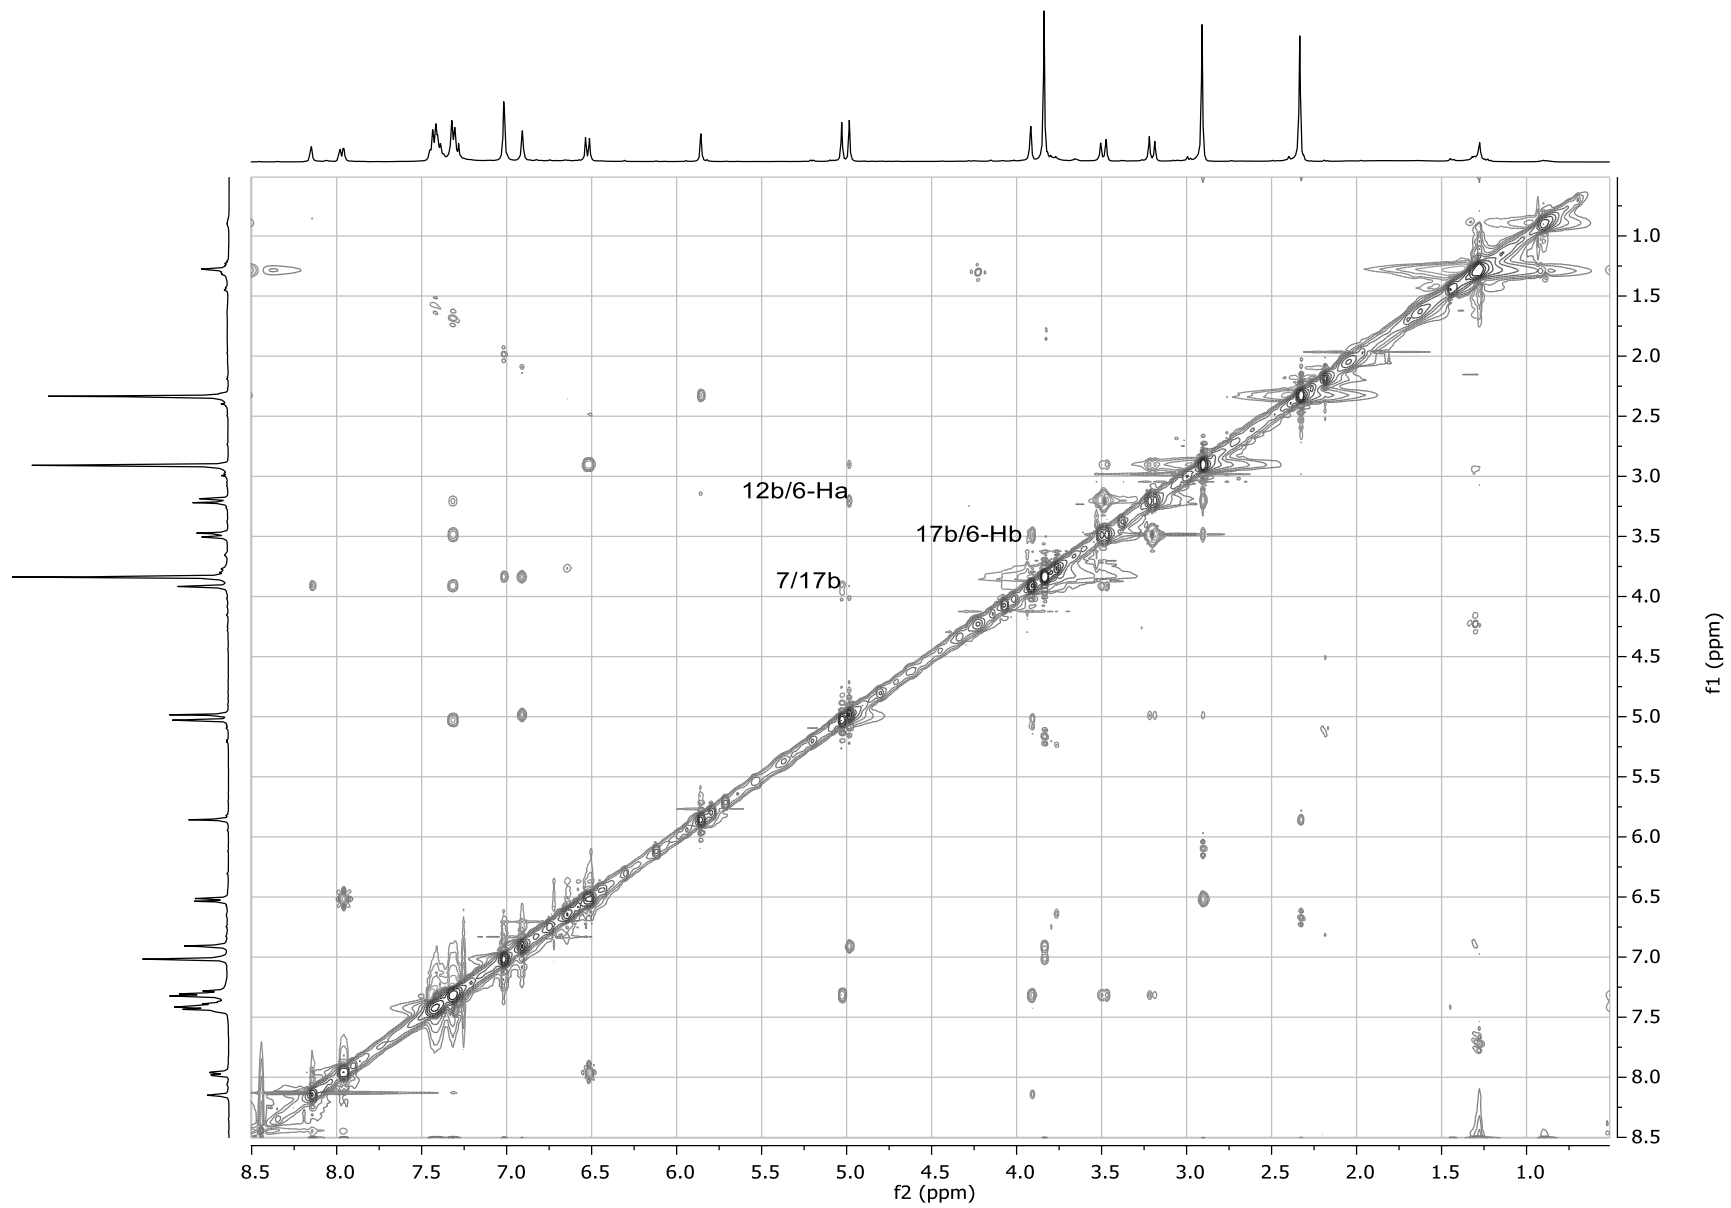

Figure S113. NOESY spectrum of (6a*S*,7*R*,12b*R*,17b*S*)-**4be** in CDCl<sub>3</sub> at 400 MHz.

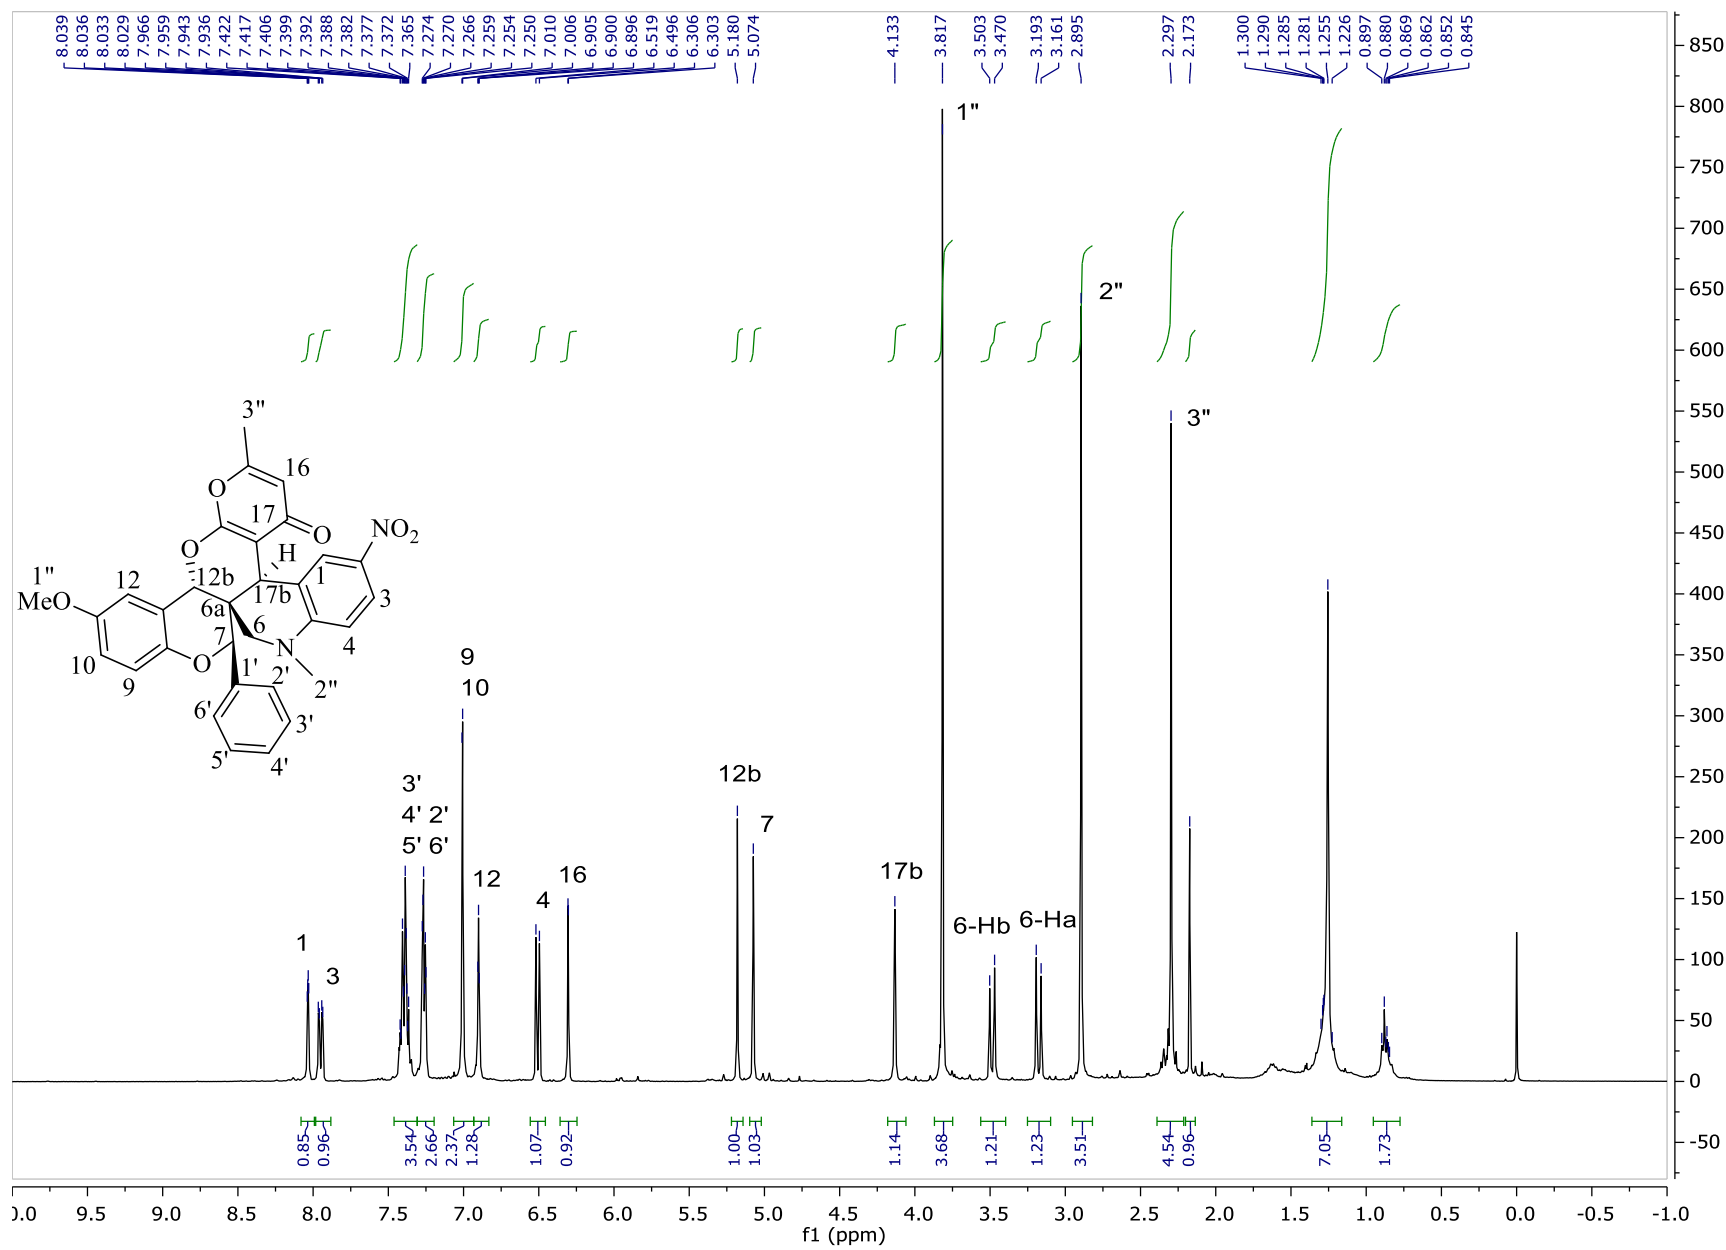

Figure S114. <sup>1</sup>H-NMR spectrum of (6a*S*,7*R*,12b*R*,17b*S*)-**6be** in CDCl<sub>3</sub> at 400 MHz.

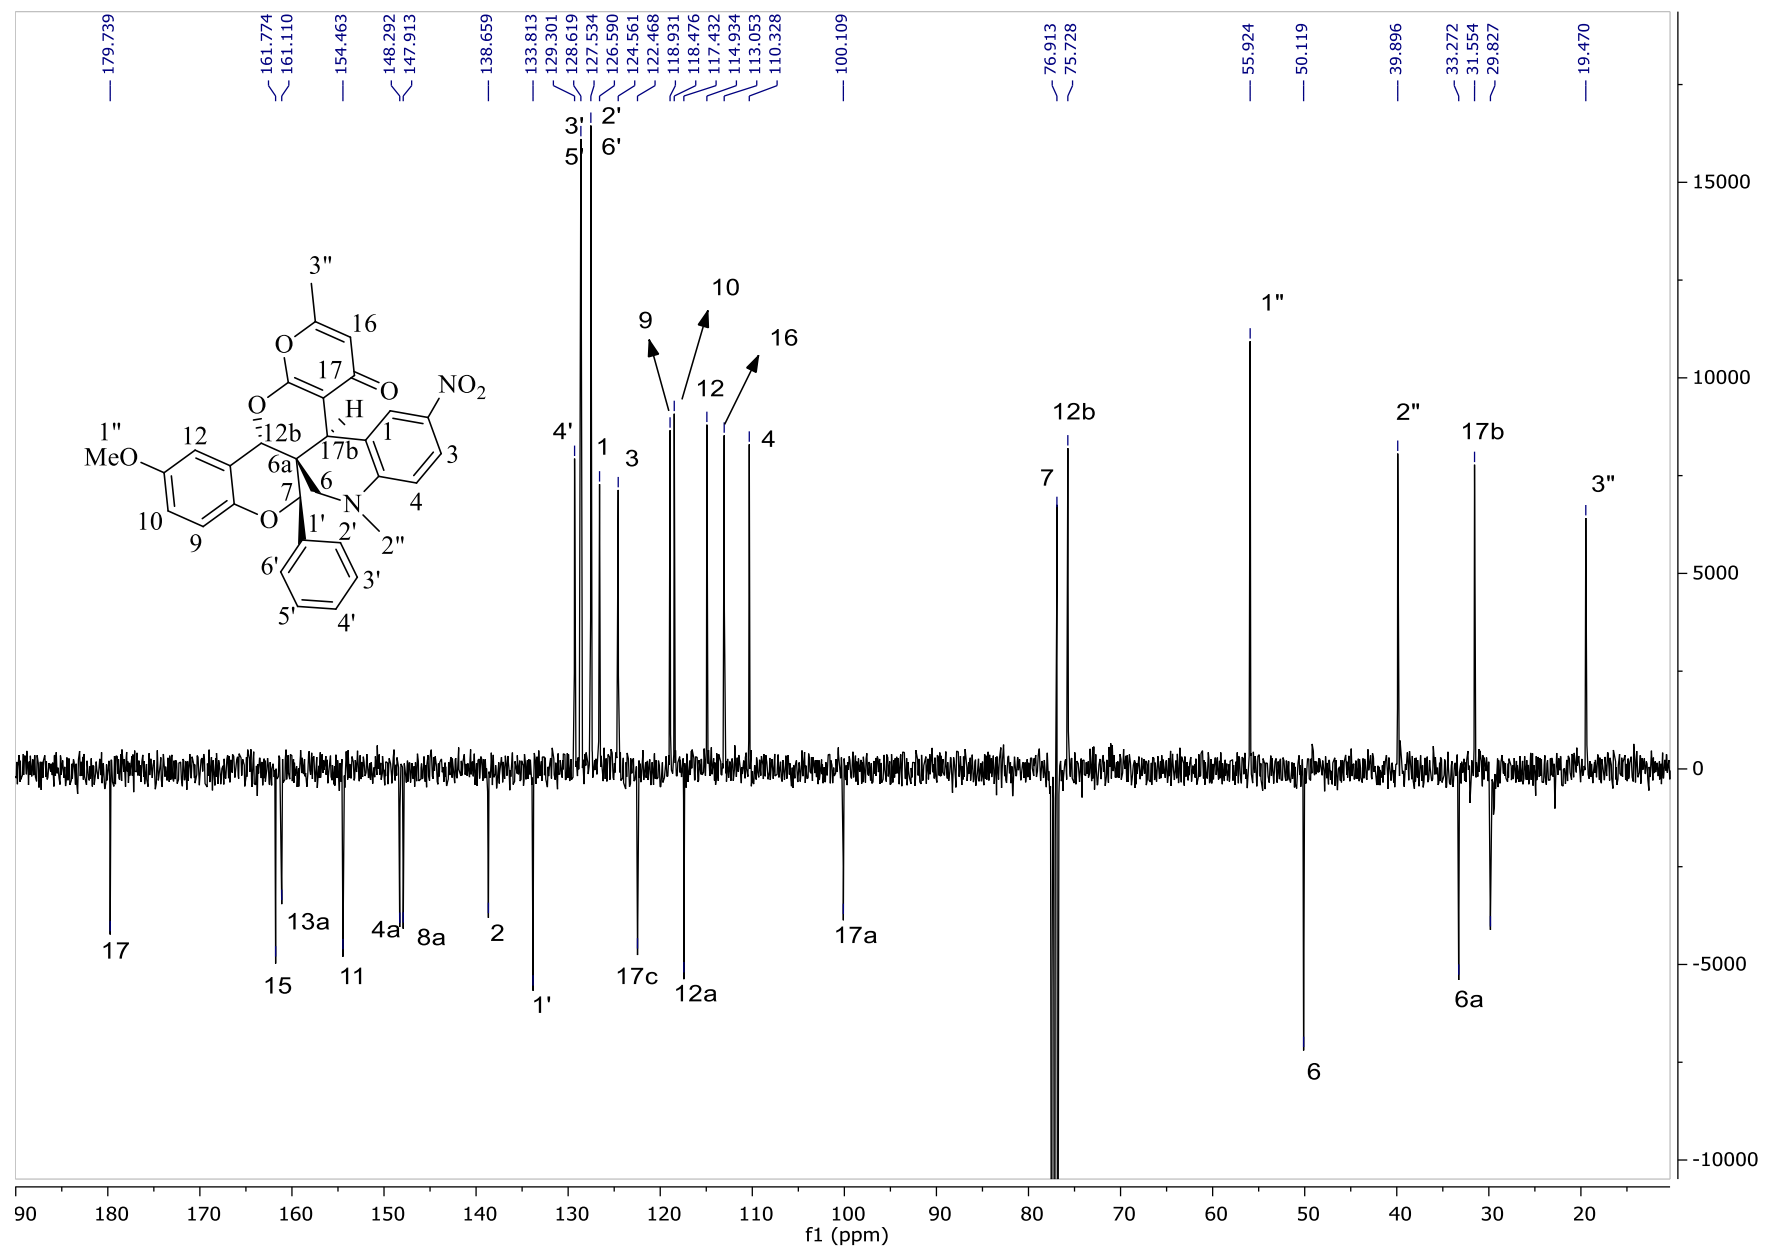

Figure S115. <sup>13</sup>C-NMR spectrum of (6aS,7R,12bR,17bS)-**6be** in CDCl<sub>3</sub> at 100 MHz.

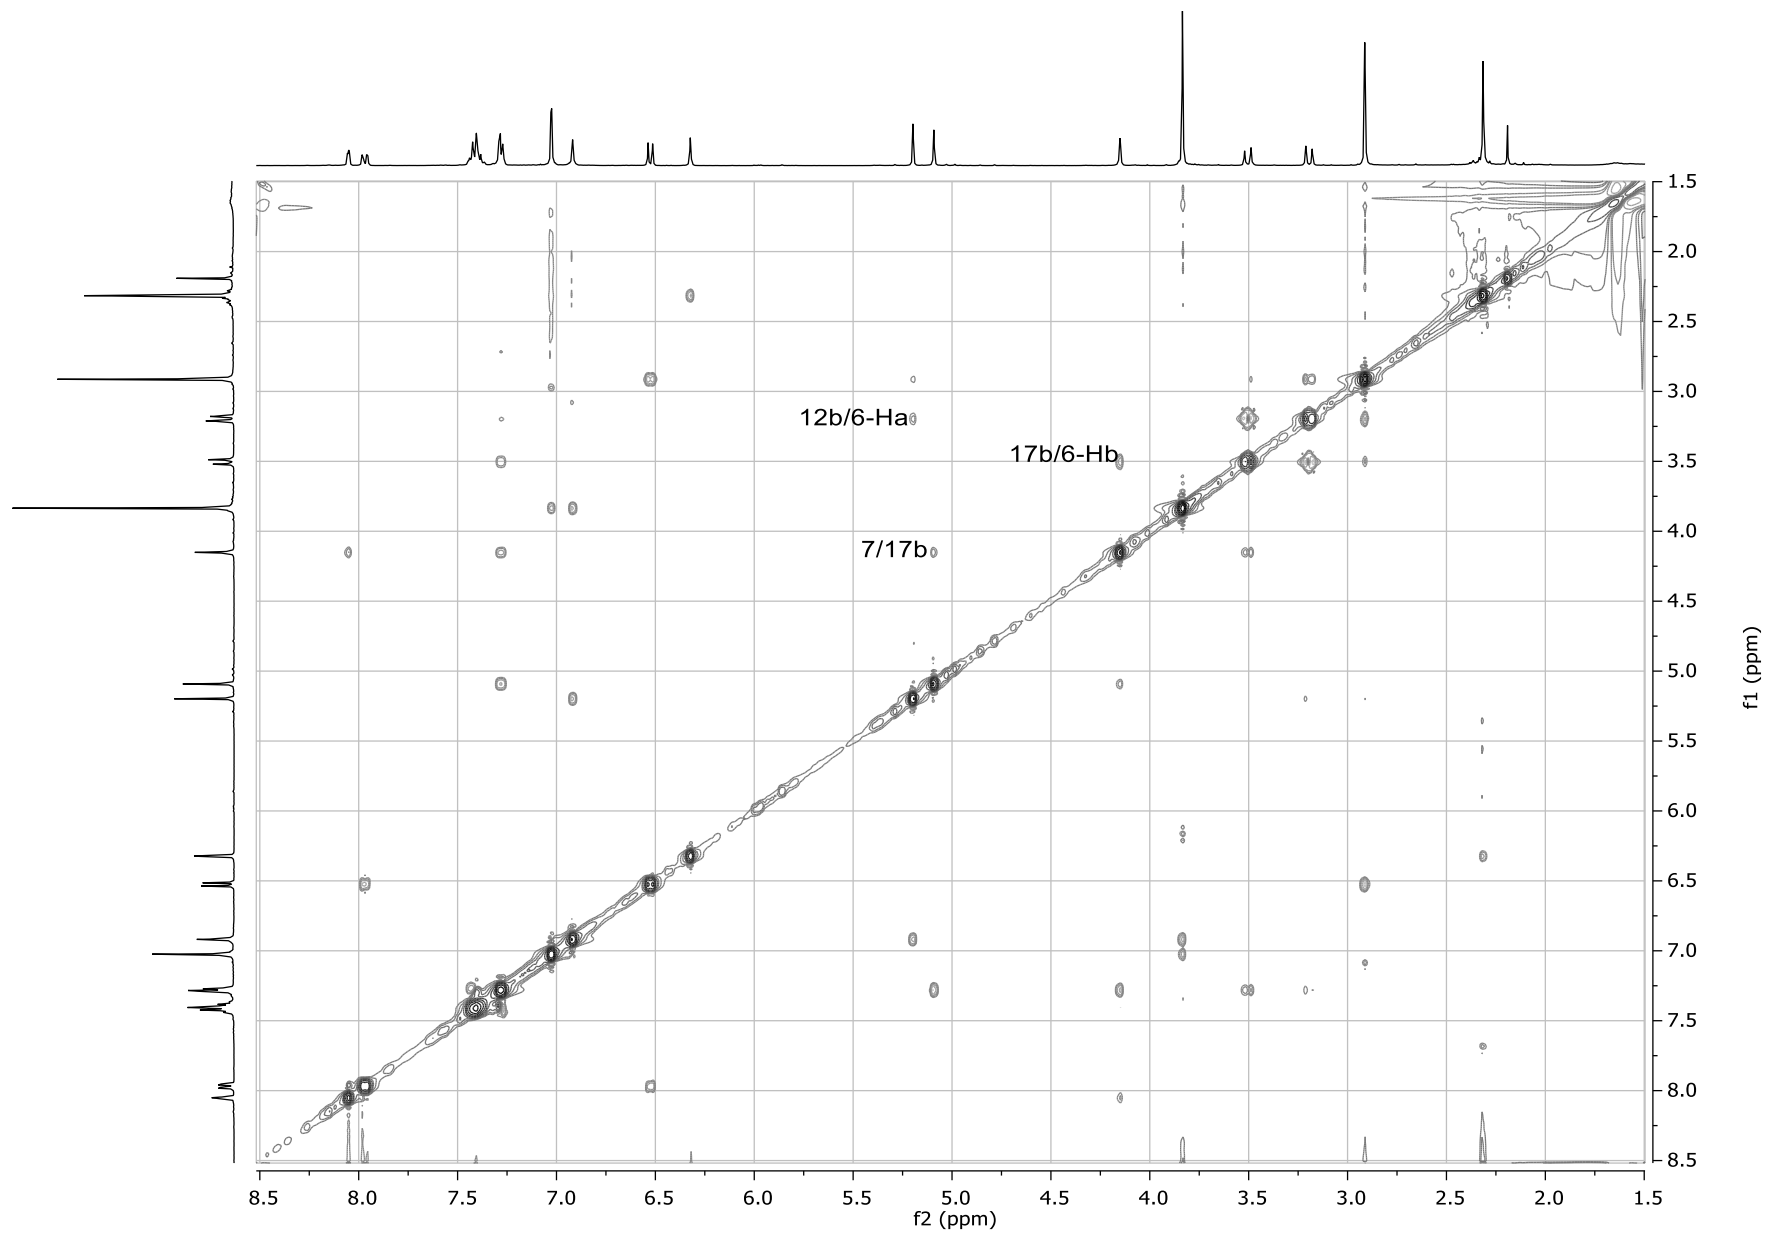

Figure S116. NOESY spectrum of (6a*S*,7*R*,12b*R*,17b*S*)-**6be** in CDCl<sub>3</sub> at 400 MHz.

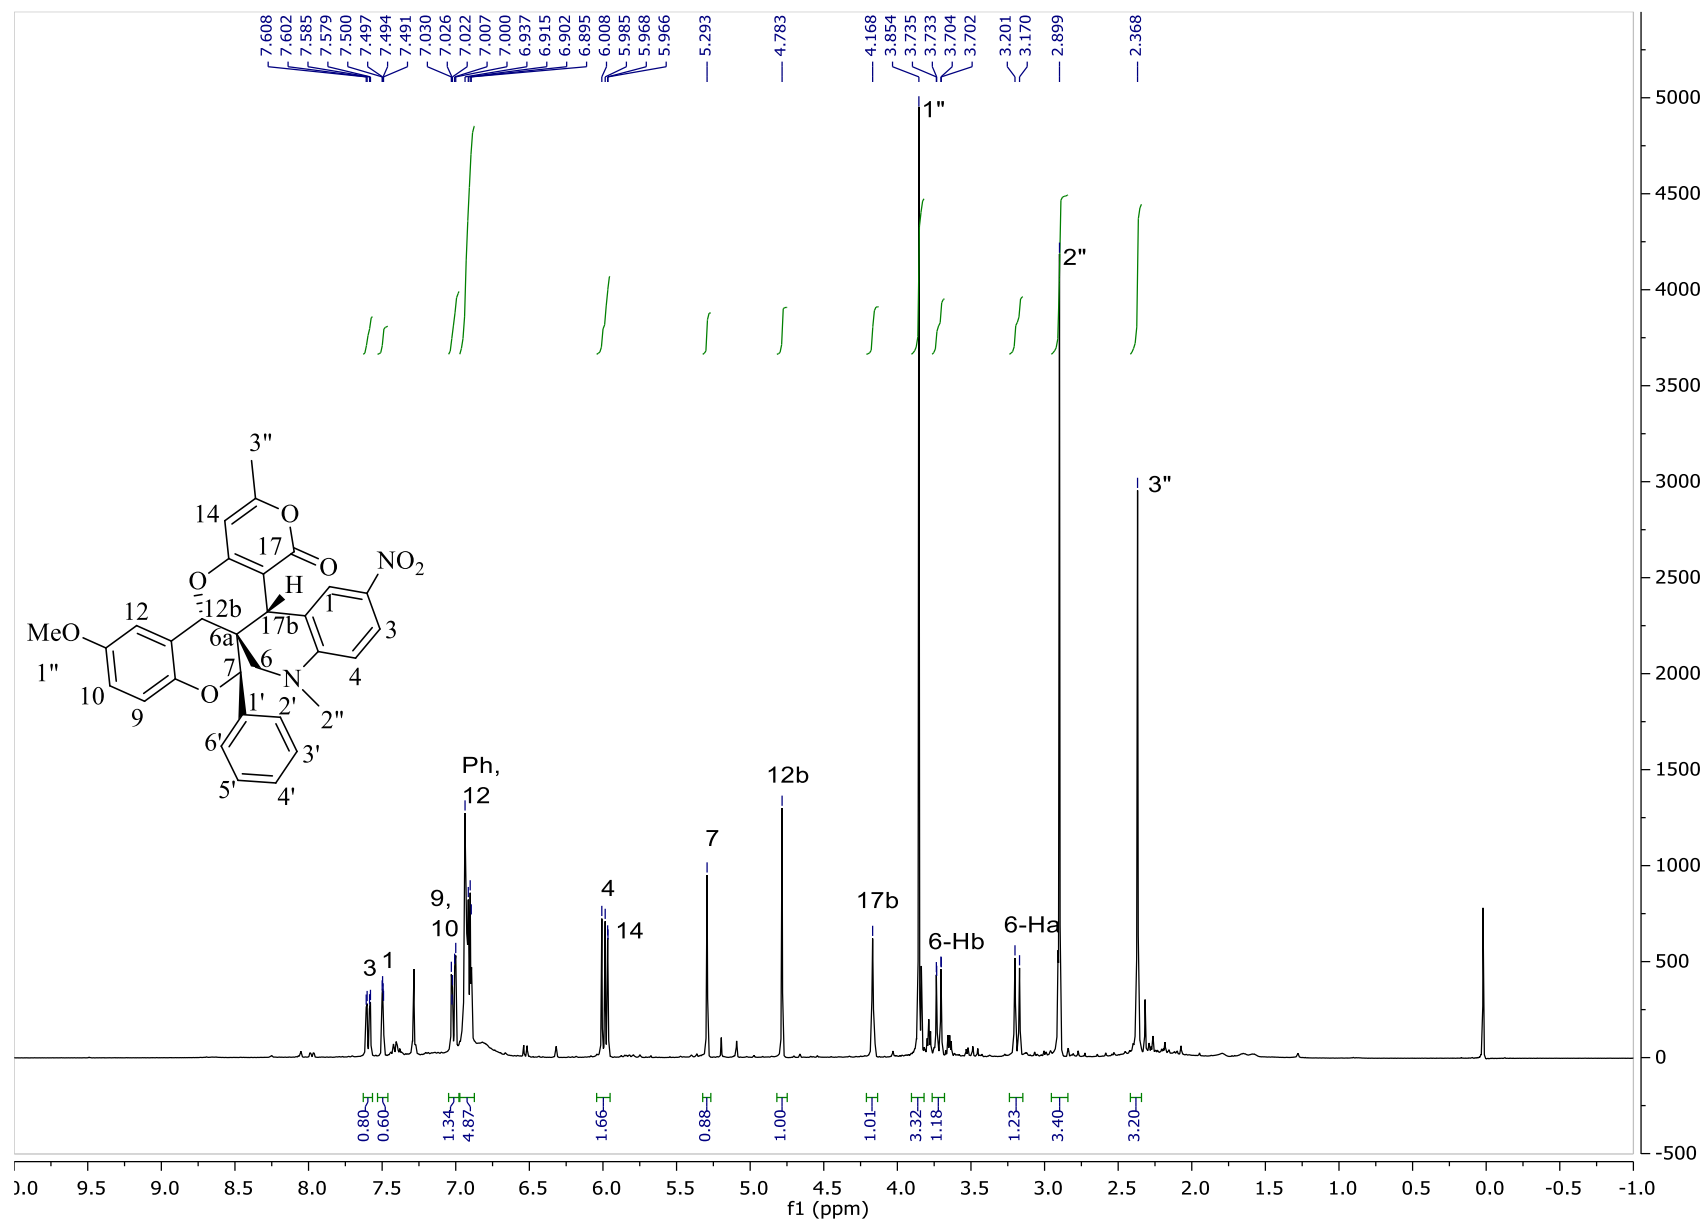

Figure S117. <sup>1</sup>H-NMR spectrum of (6aS,7R,12bR,17bR)-5be in CDCl<sub>3</sub> at 400 MHz.

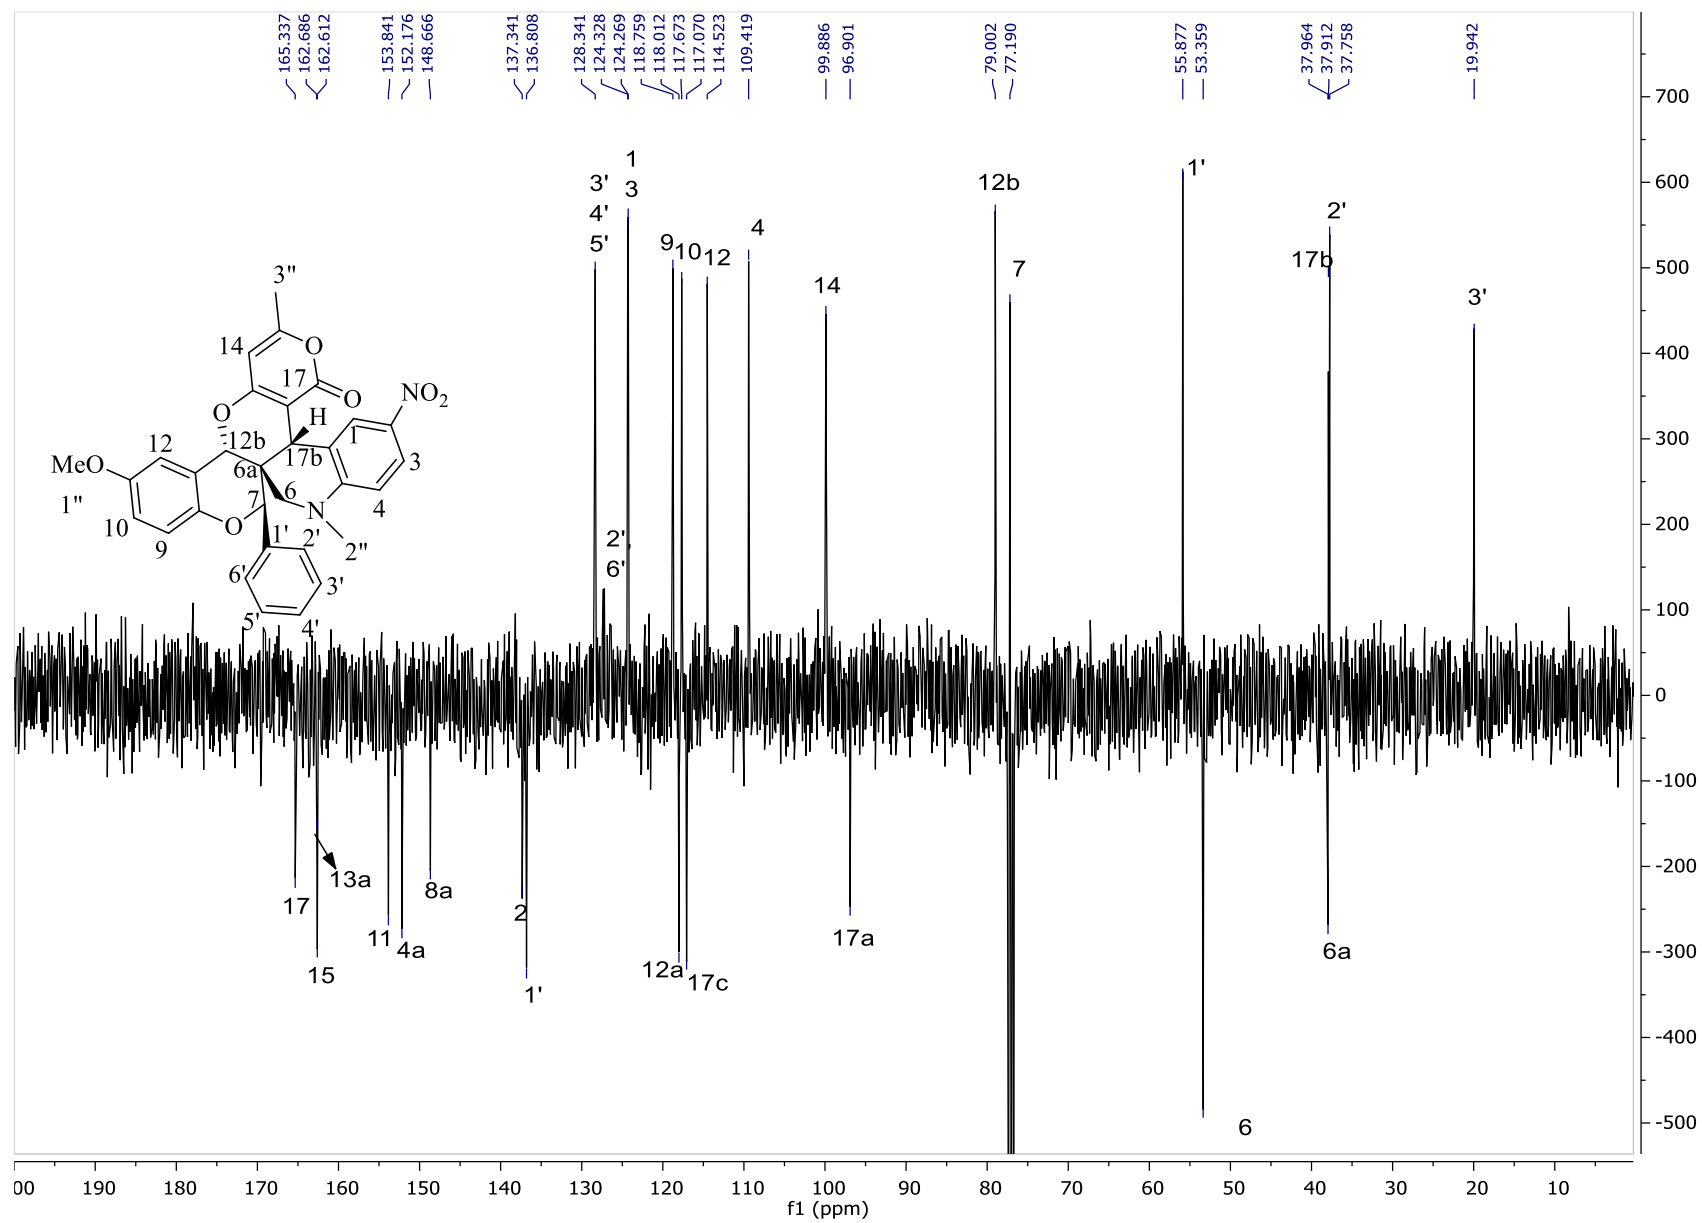

Figure S118. <sup>13</sup>C-NMR spectrum of (6aS,7R,12bR,17bR)-5be in CDCl<sub>3</sub> at 100 MHz.

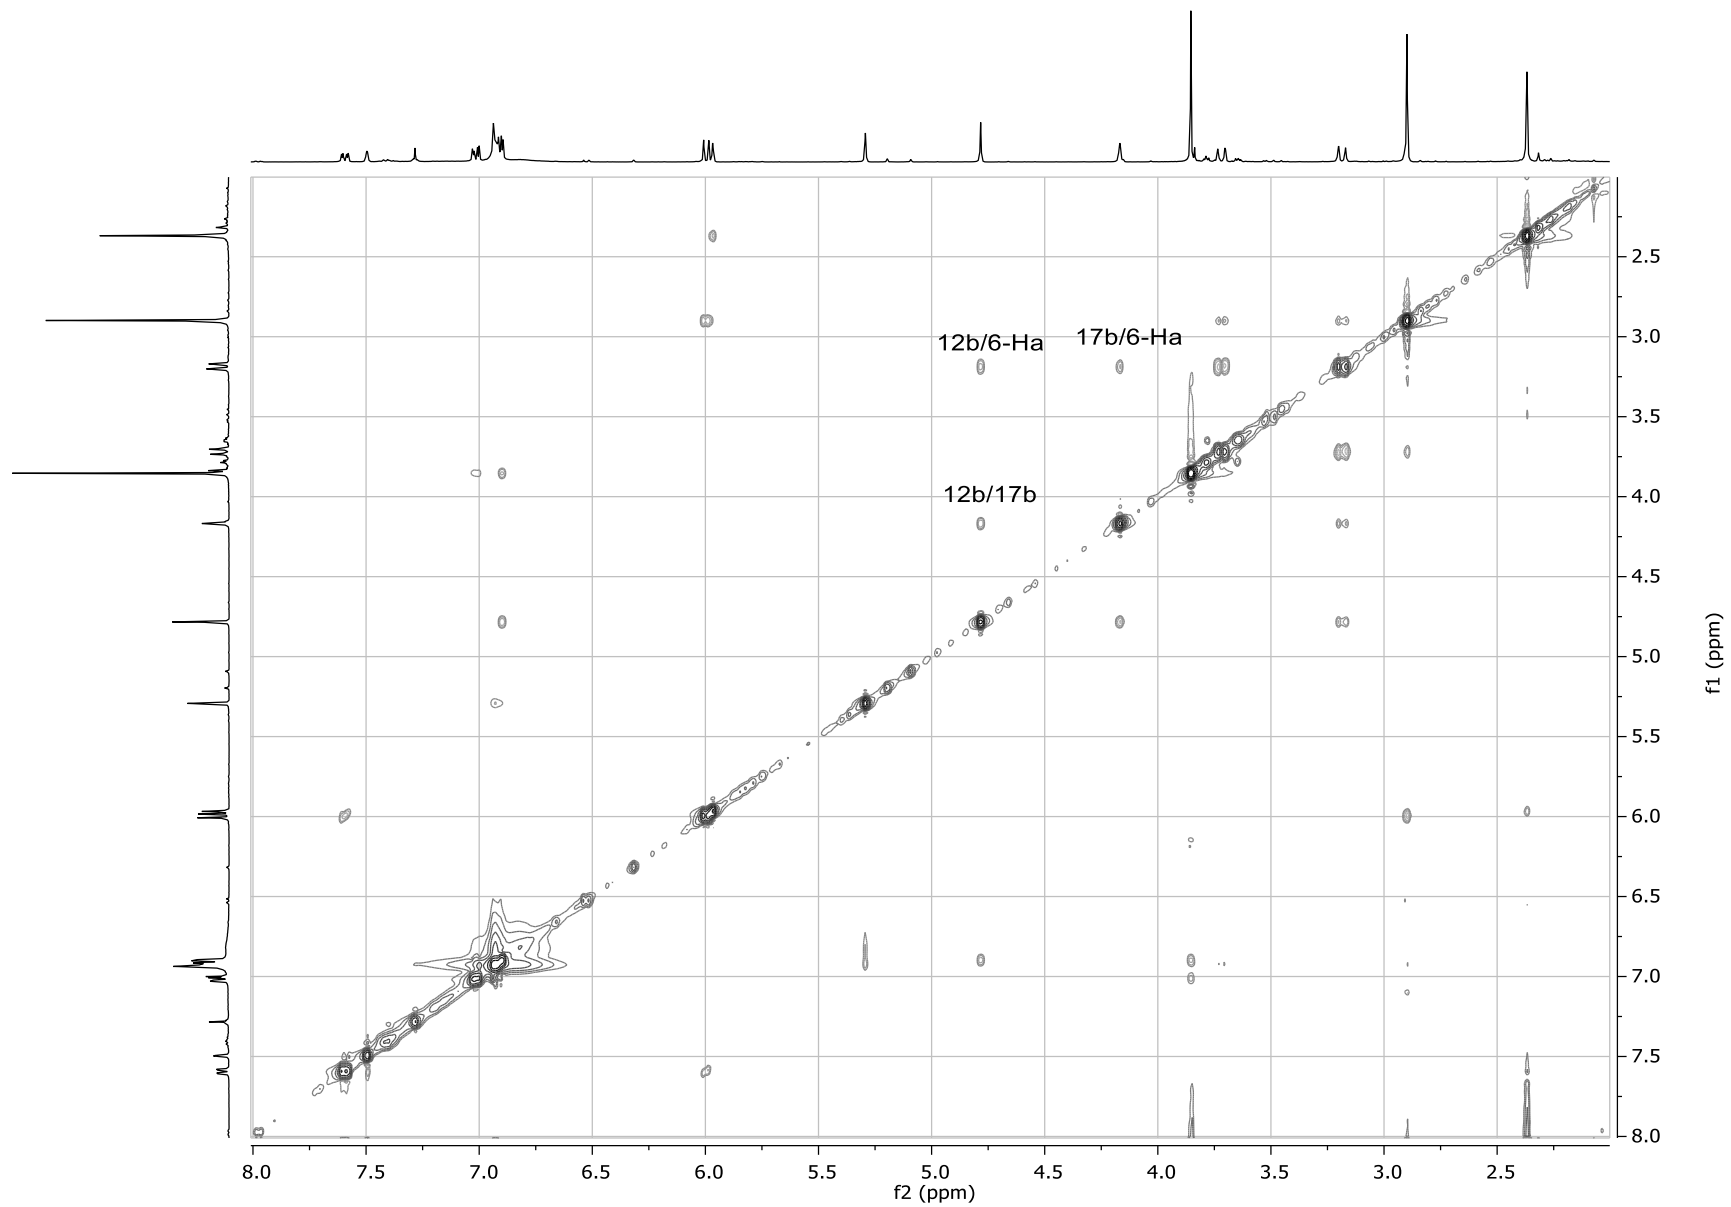

Figure S119. NOESY spectrum of (6a*S*,7*R*,12b*R*,17b*R*)-**5be** in CDCl<sub>3</sub> at 400 MHz.

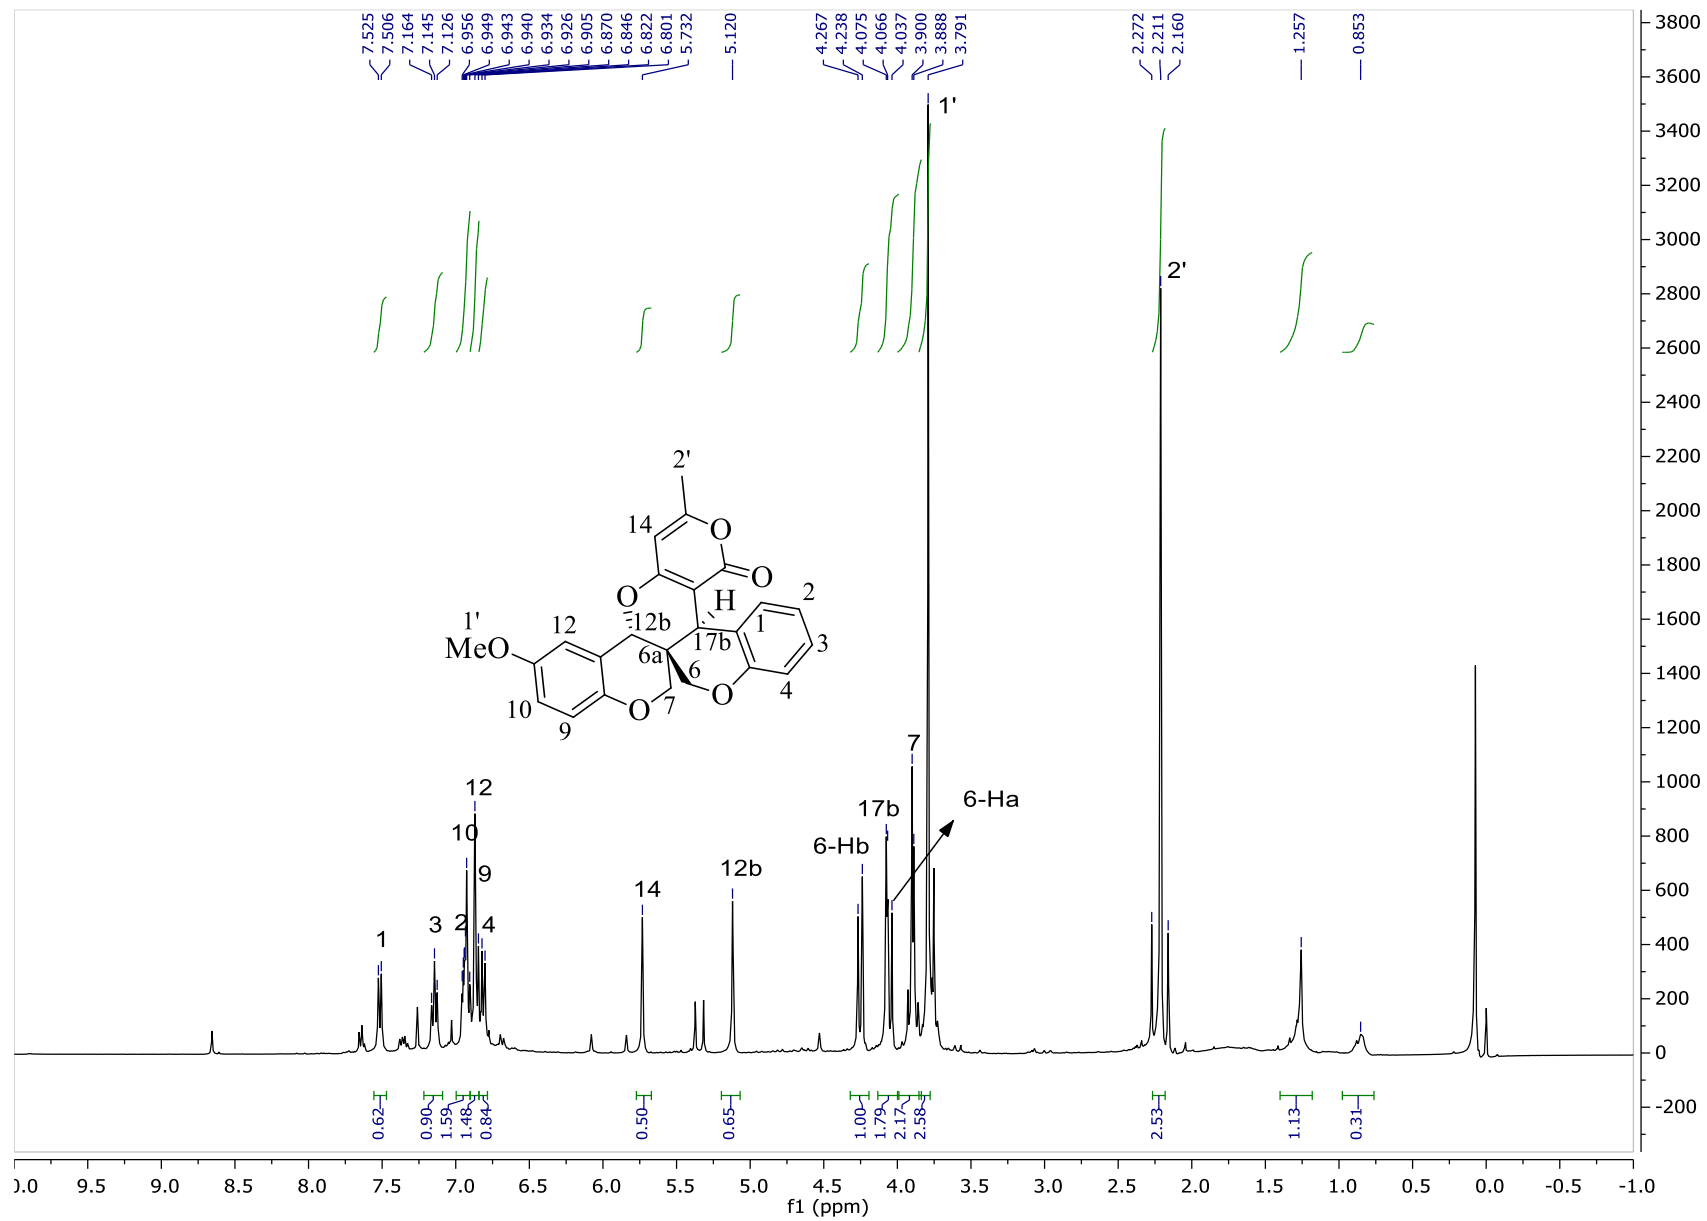

Figure S120. <sup>1</sup>H-NMR spectrum of *rac*-(6a*S*\*,12b*R*\*,17b*R*\*)-4ce in CDCl<sub>3</sub> at 400 MHz.



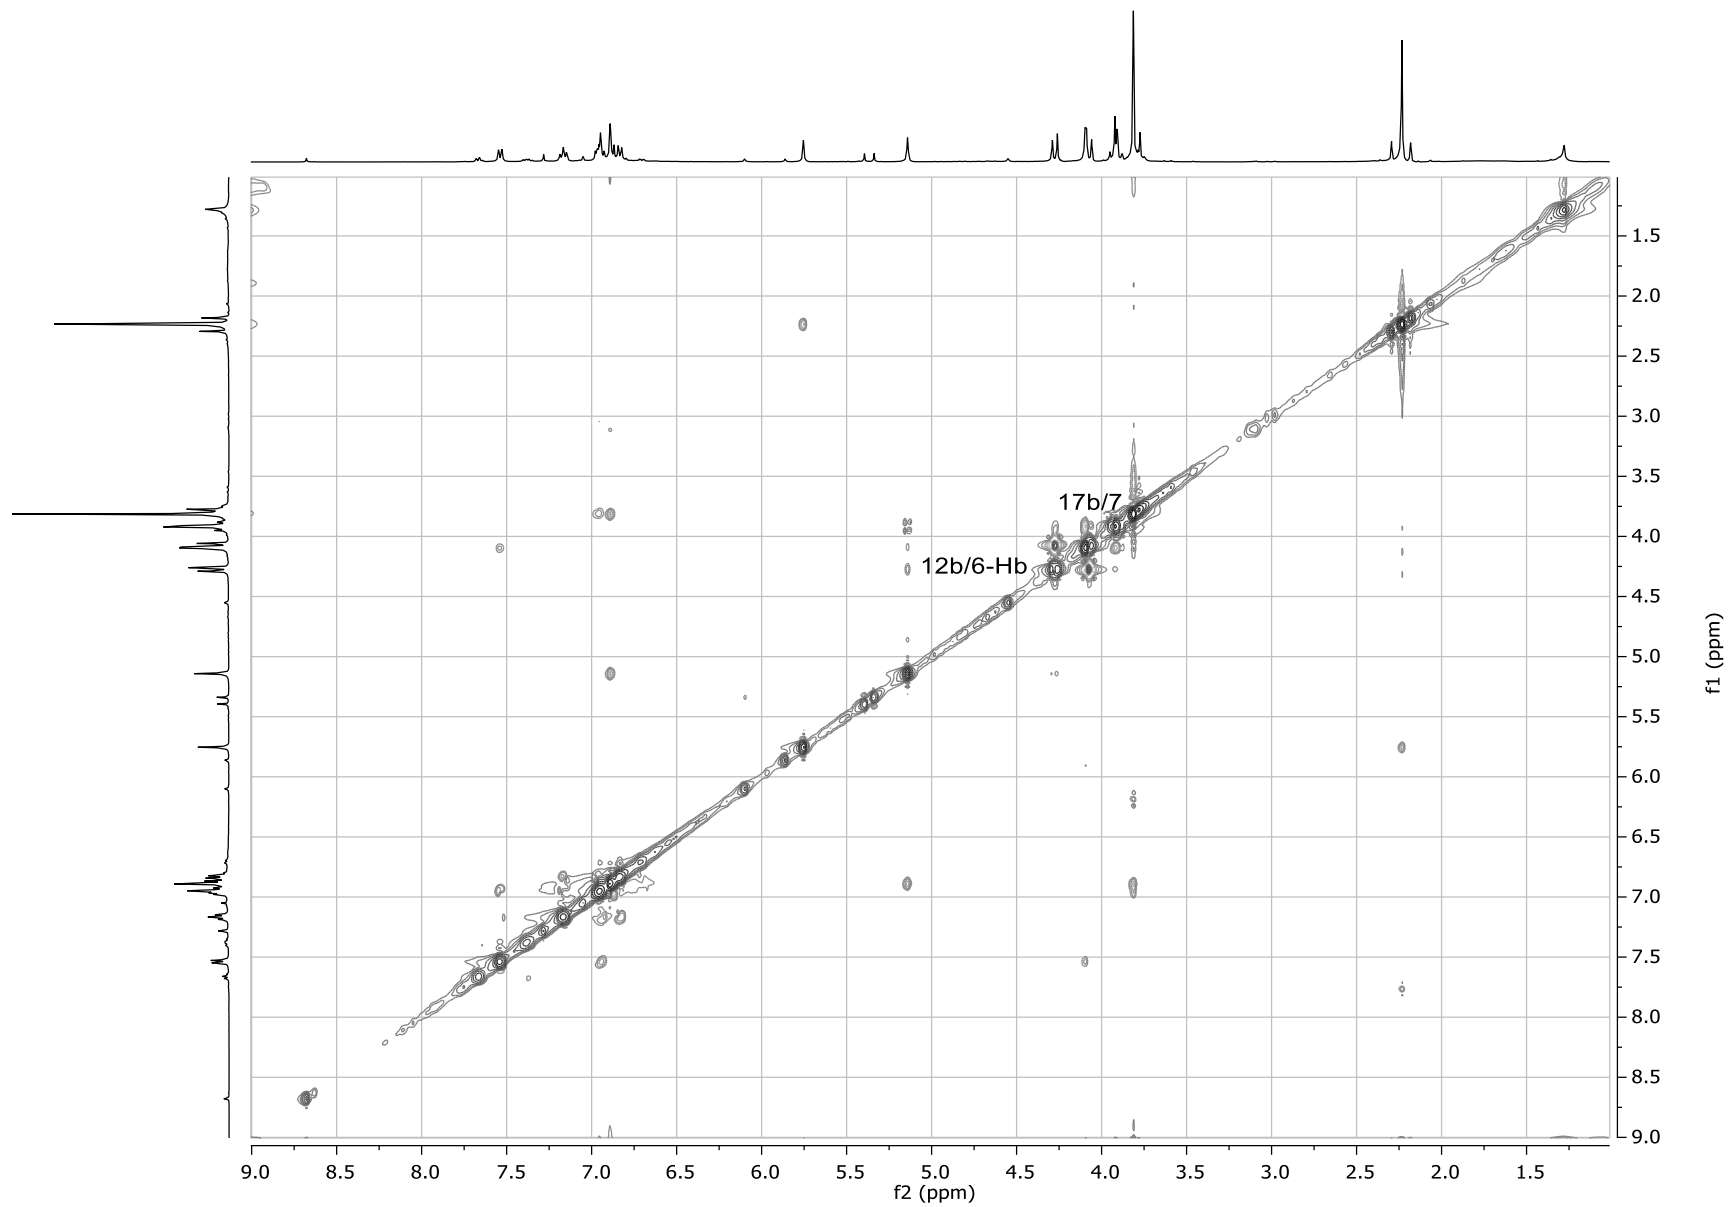

Figure S122. NOESY spectrum of *rac*-(6a*S*\*,12b*R*\*,17b*R*\*)-4ce in CDCl<sub>3</sub> at 400 MHz.

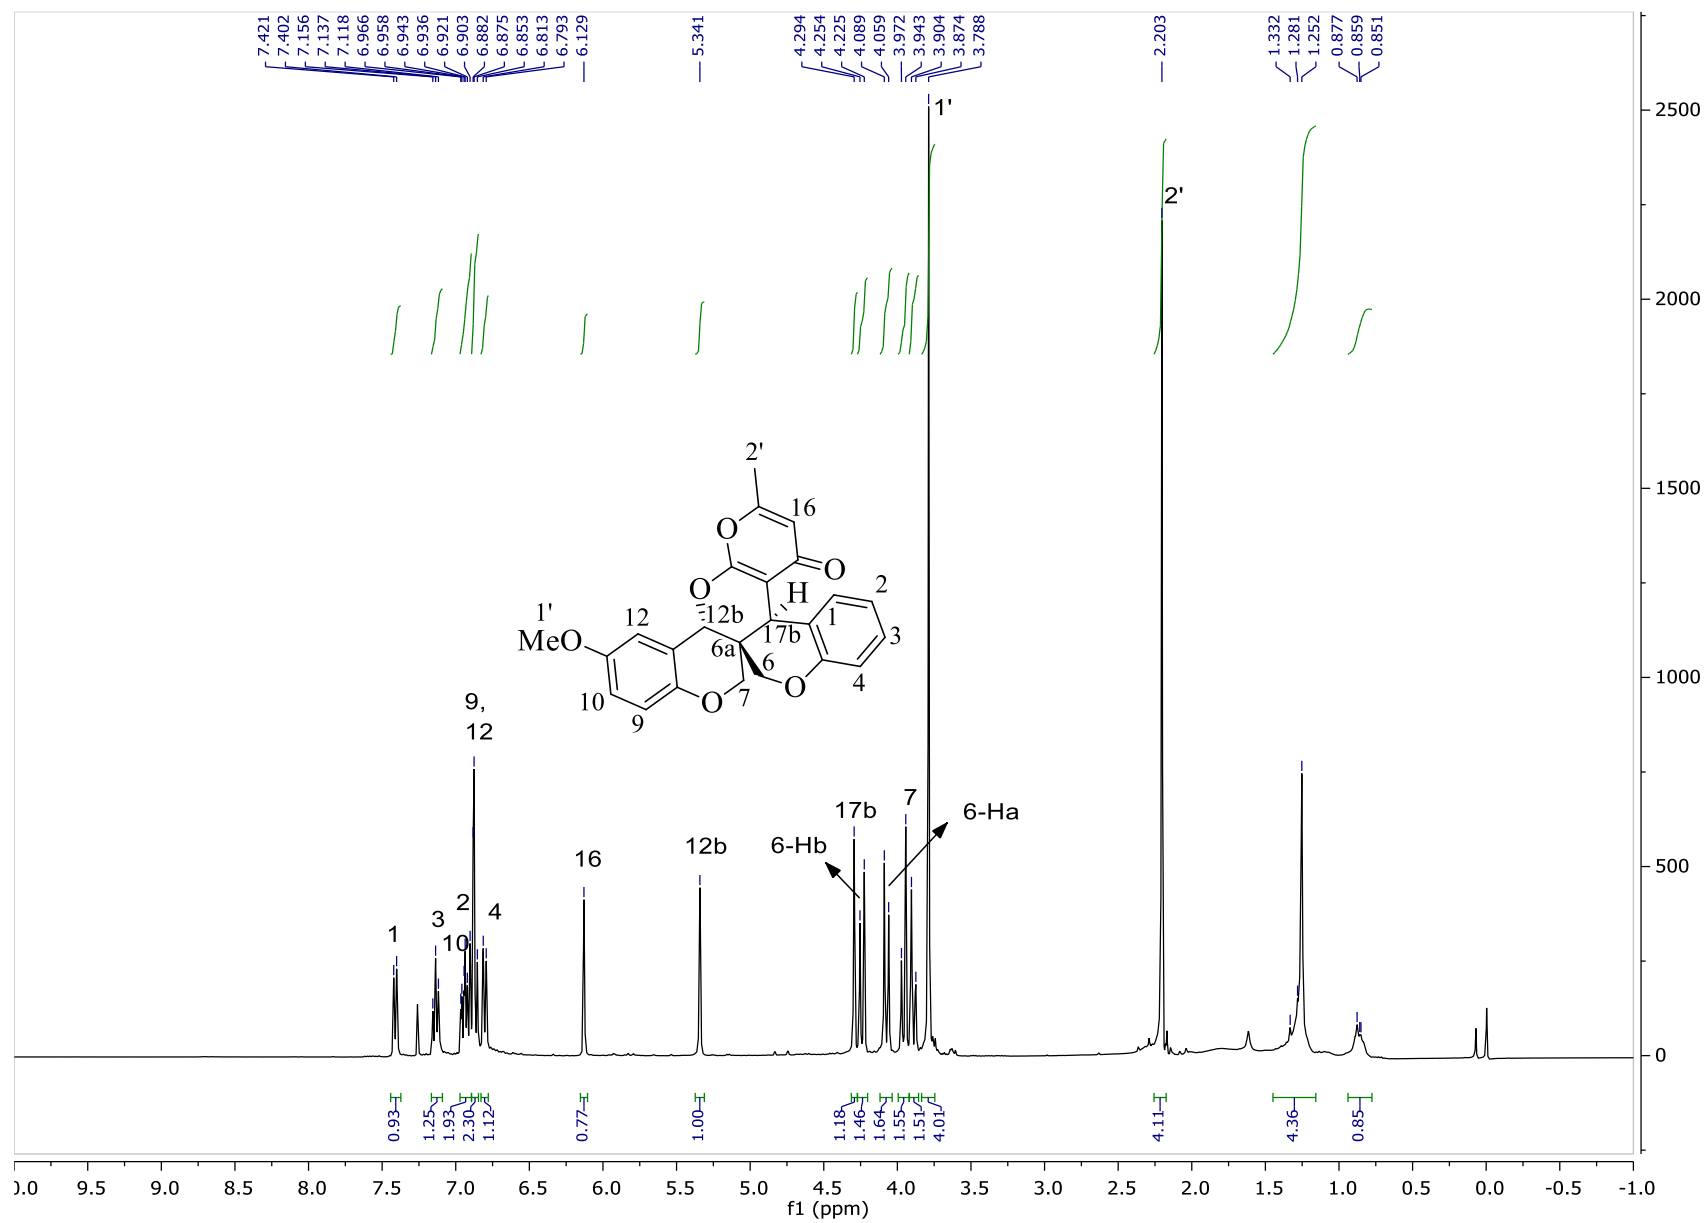

Figure S123. <sup>1</sup>H-NMR spectrum of *rac*-(6a*S*\*,12b*R*\*,17b*R*\*)-6ce in CDCl<sub>3</sub> at 400 MHz.

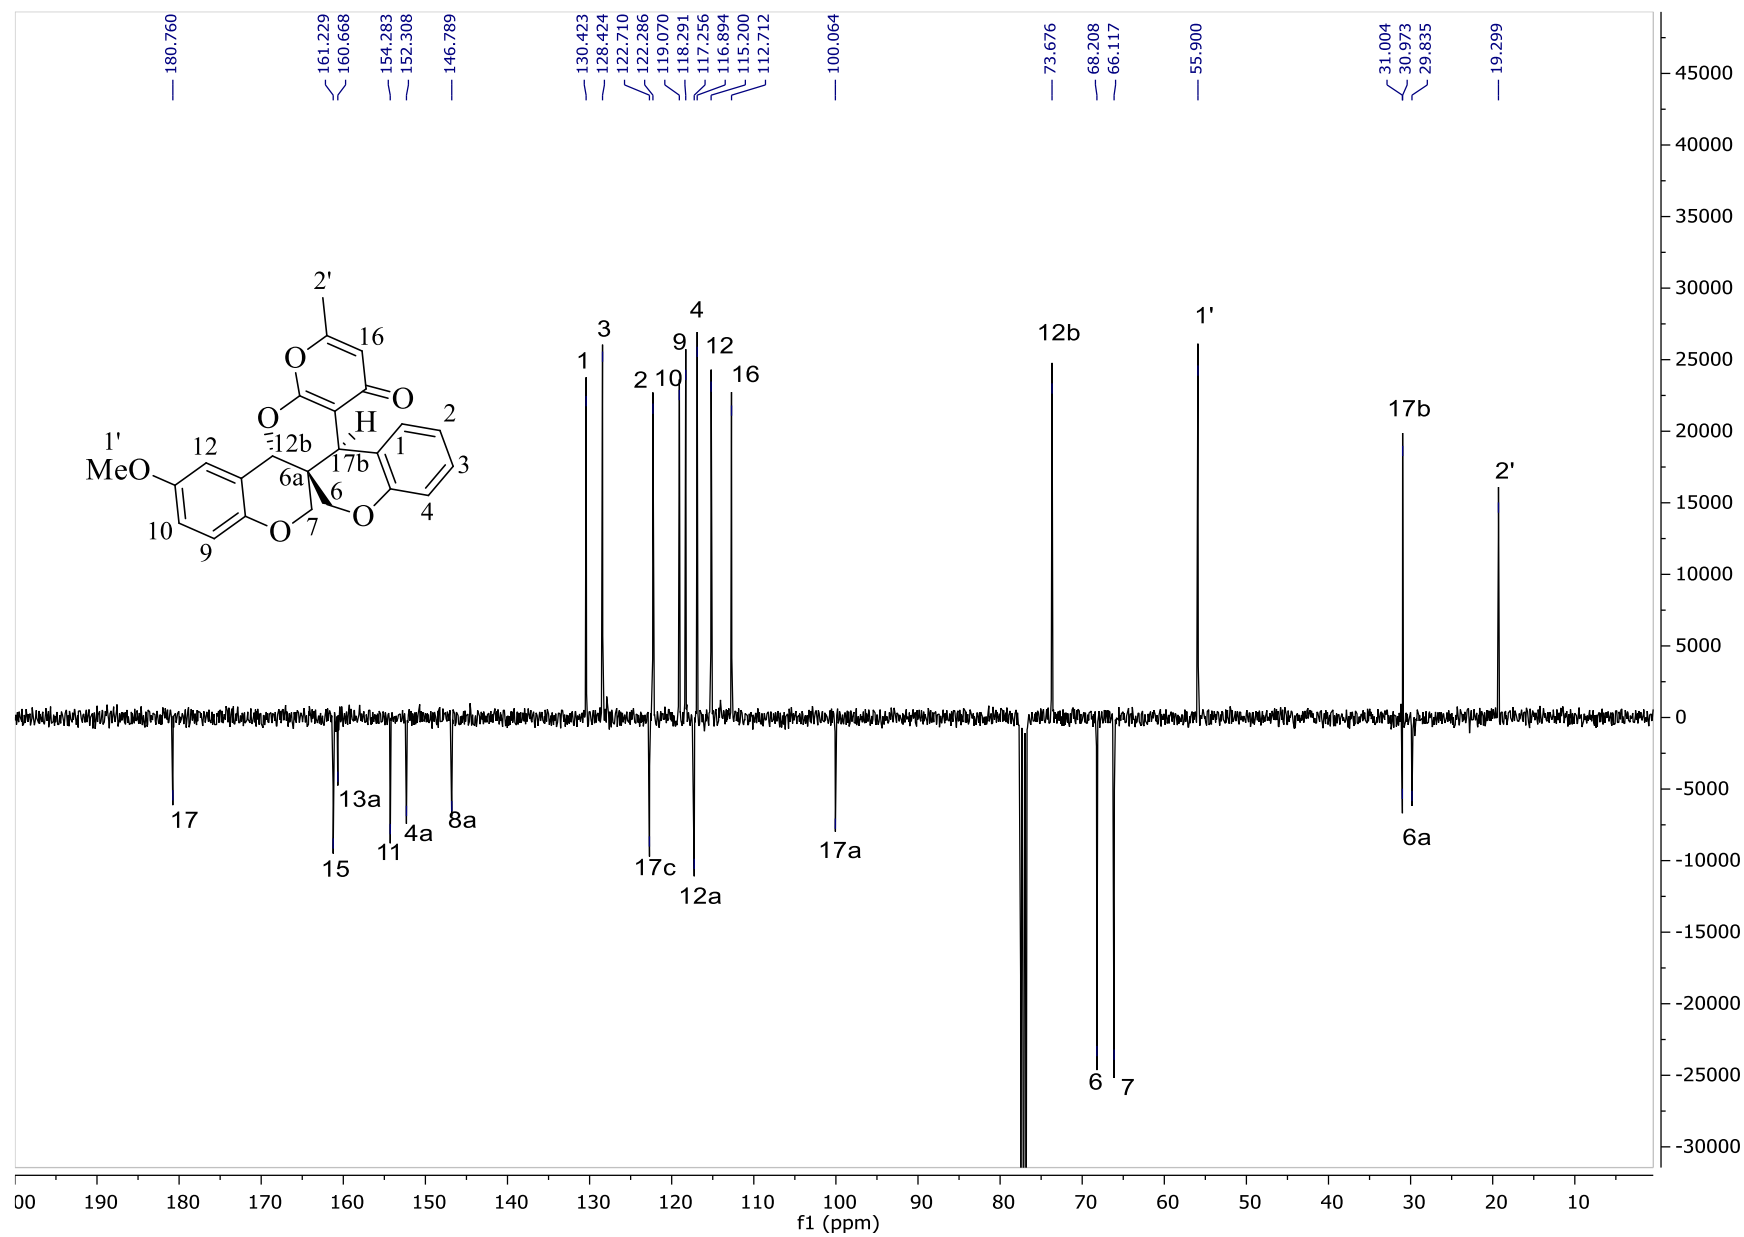

Figure S124. <sup>13</sup>C-NMR spectrum of *rac*-(6a*S*\*,12b*R*\*,17b*R*\*)-**6ce** in CDCl<sub>3</sub> at 100 MHz.

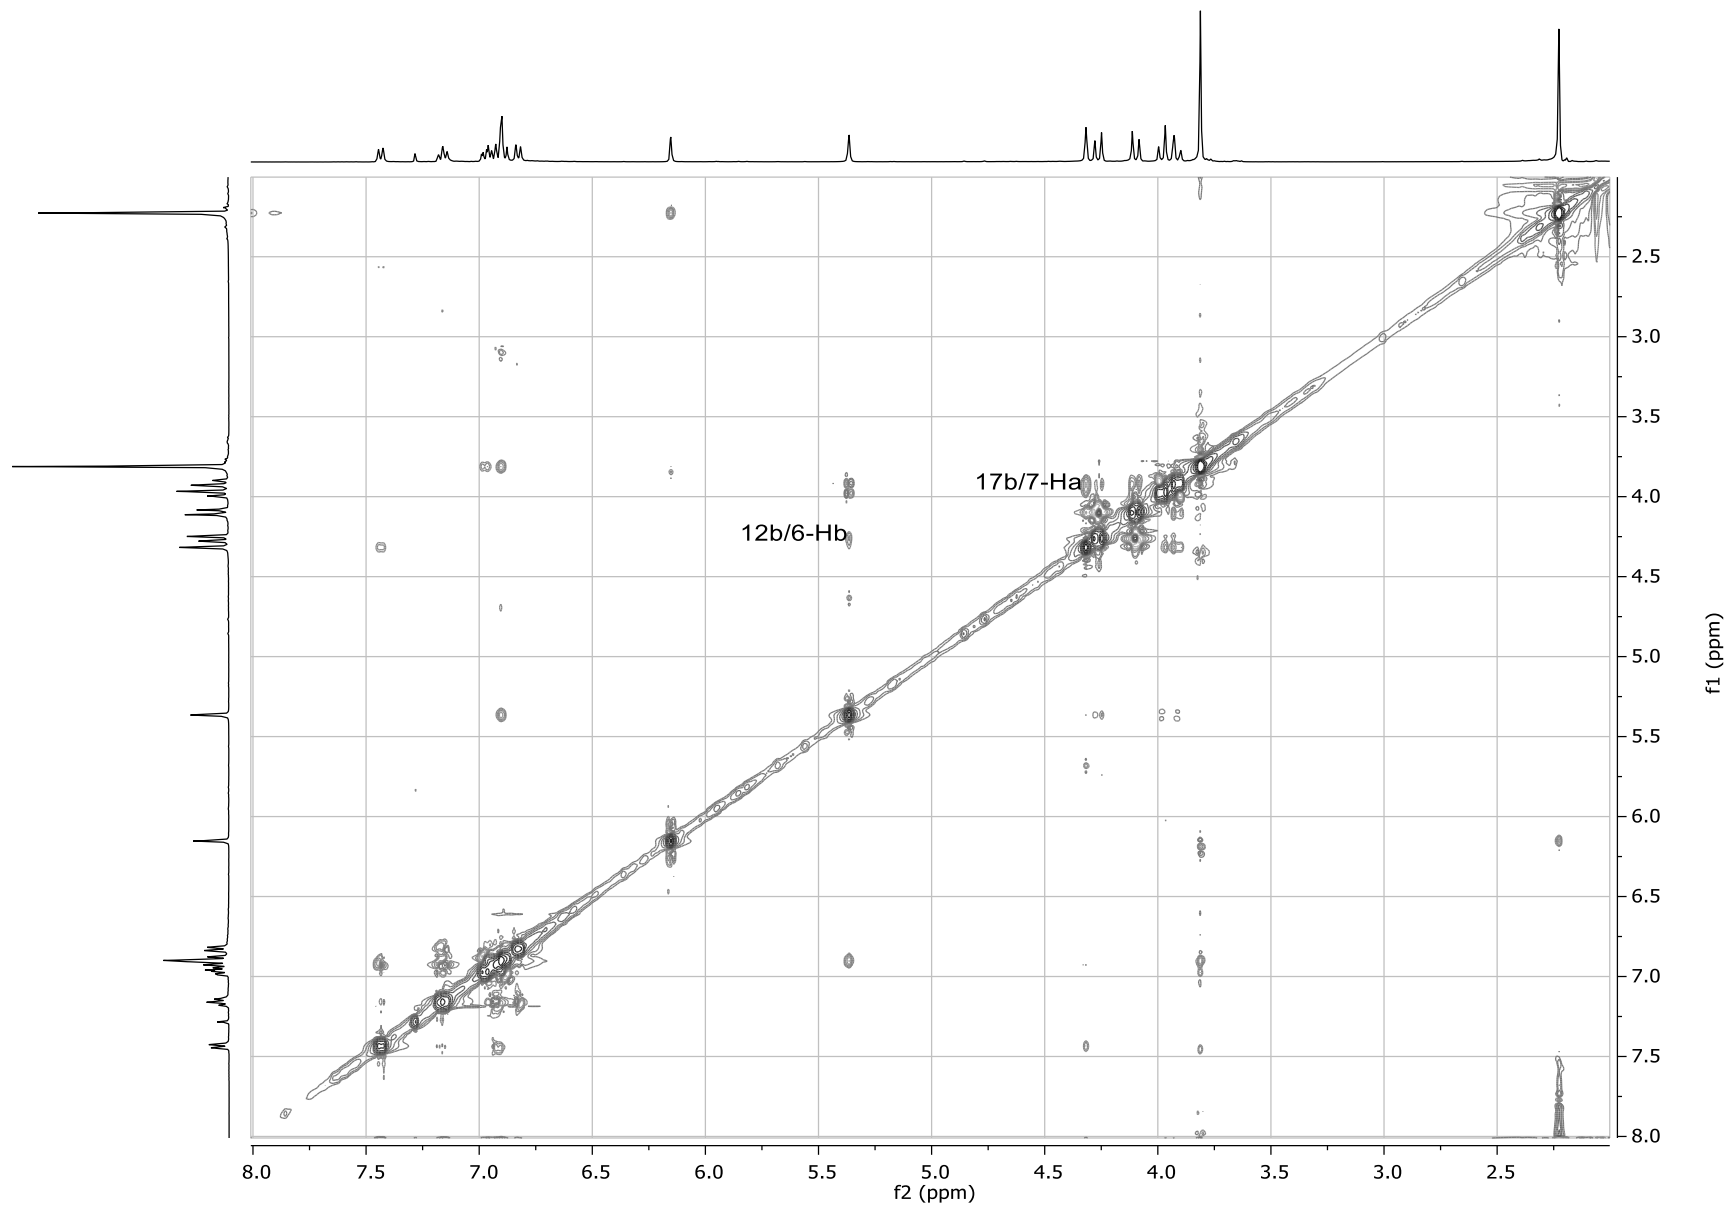

Figure S125. NOESY spectrum of *rac*-(6a*S*\*,12b*R*\*,17b*R*\*)-6ce in CDCl<sub>3</sub> at 400 MHz.

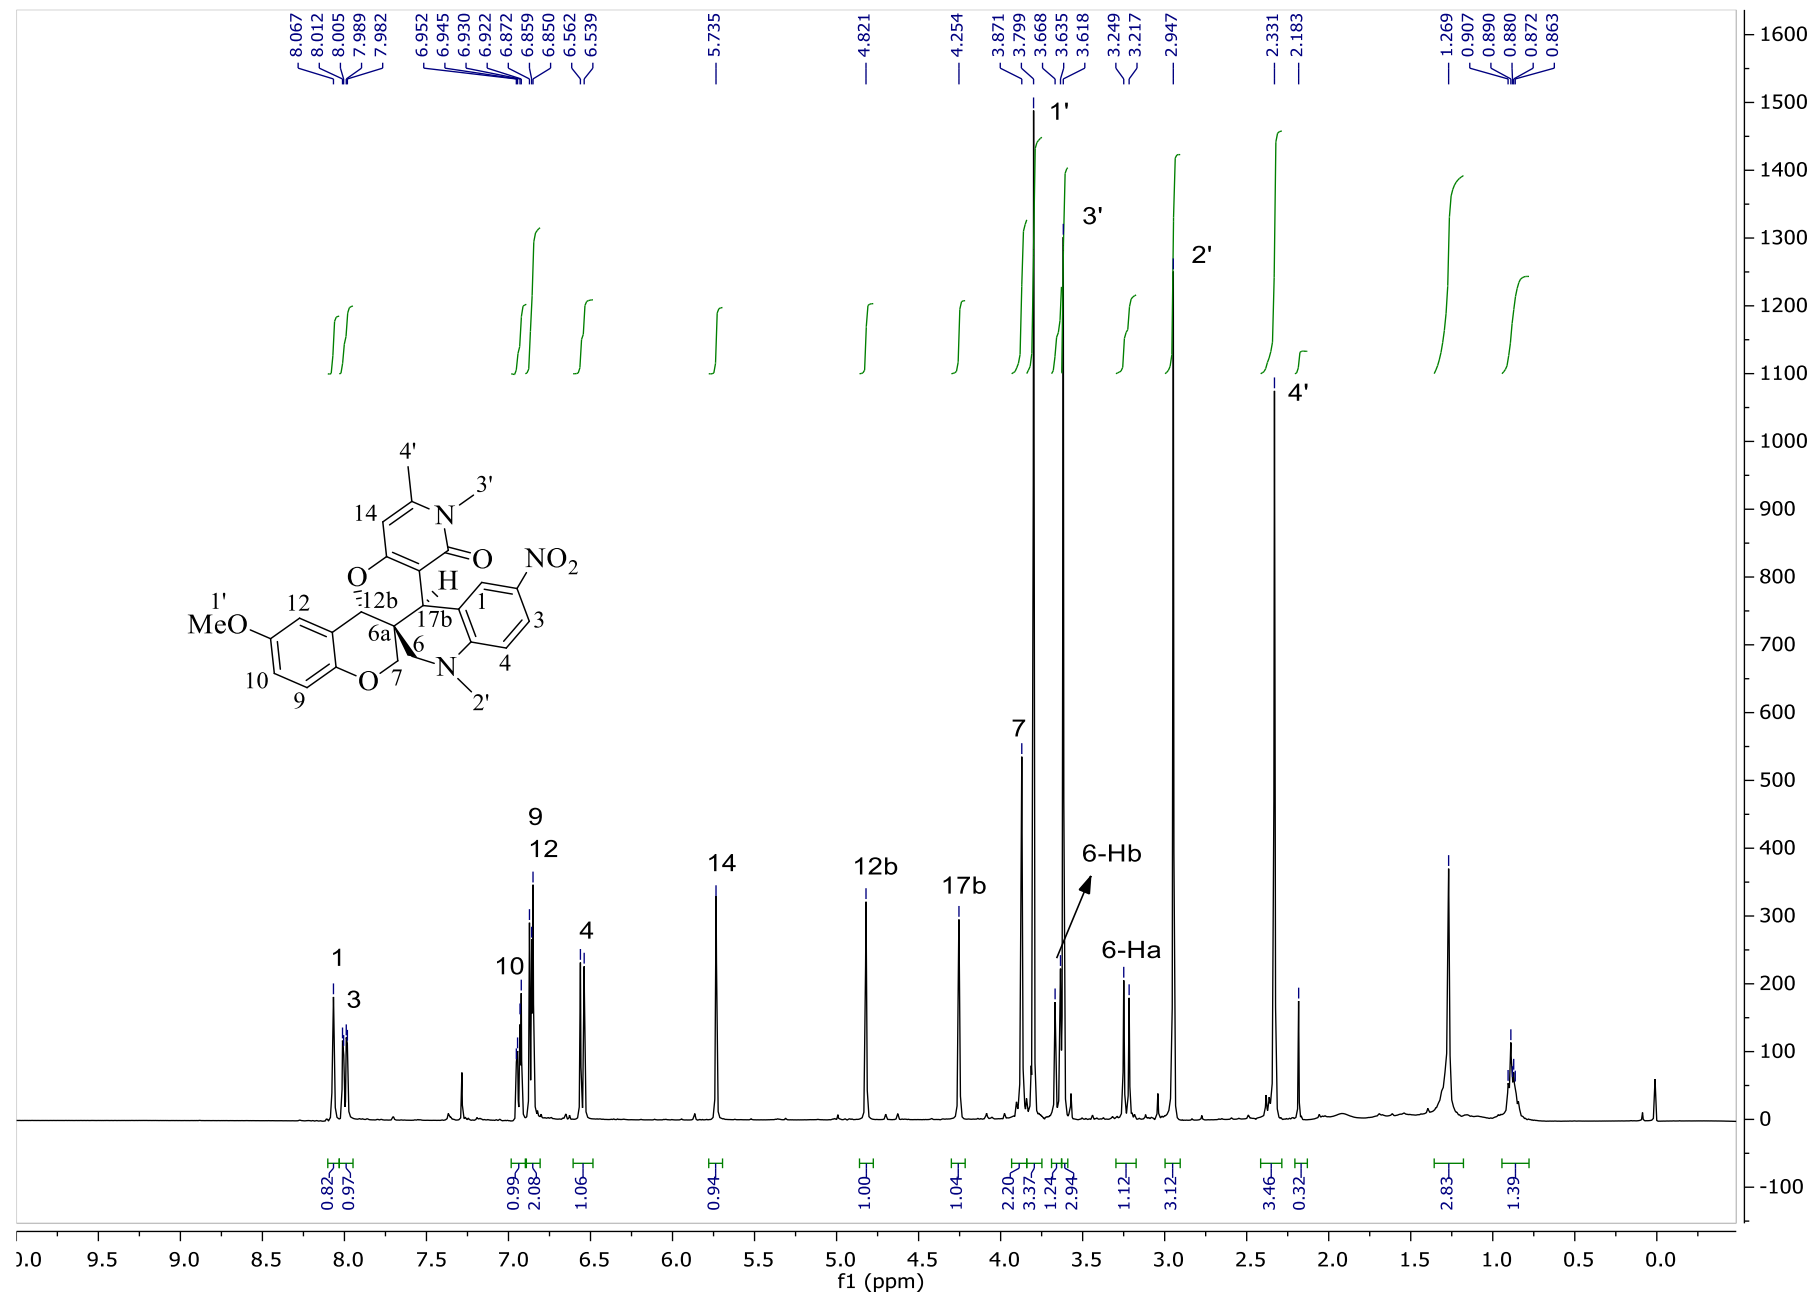

Figure S126. <sup>1</sup>H-NMR spectrum of *rac*-(6a*S*\*,12b*R*\*,17b*S*\*)-4af in CDCl<sub>3</sub> at 400 MHz.

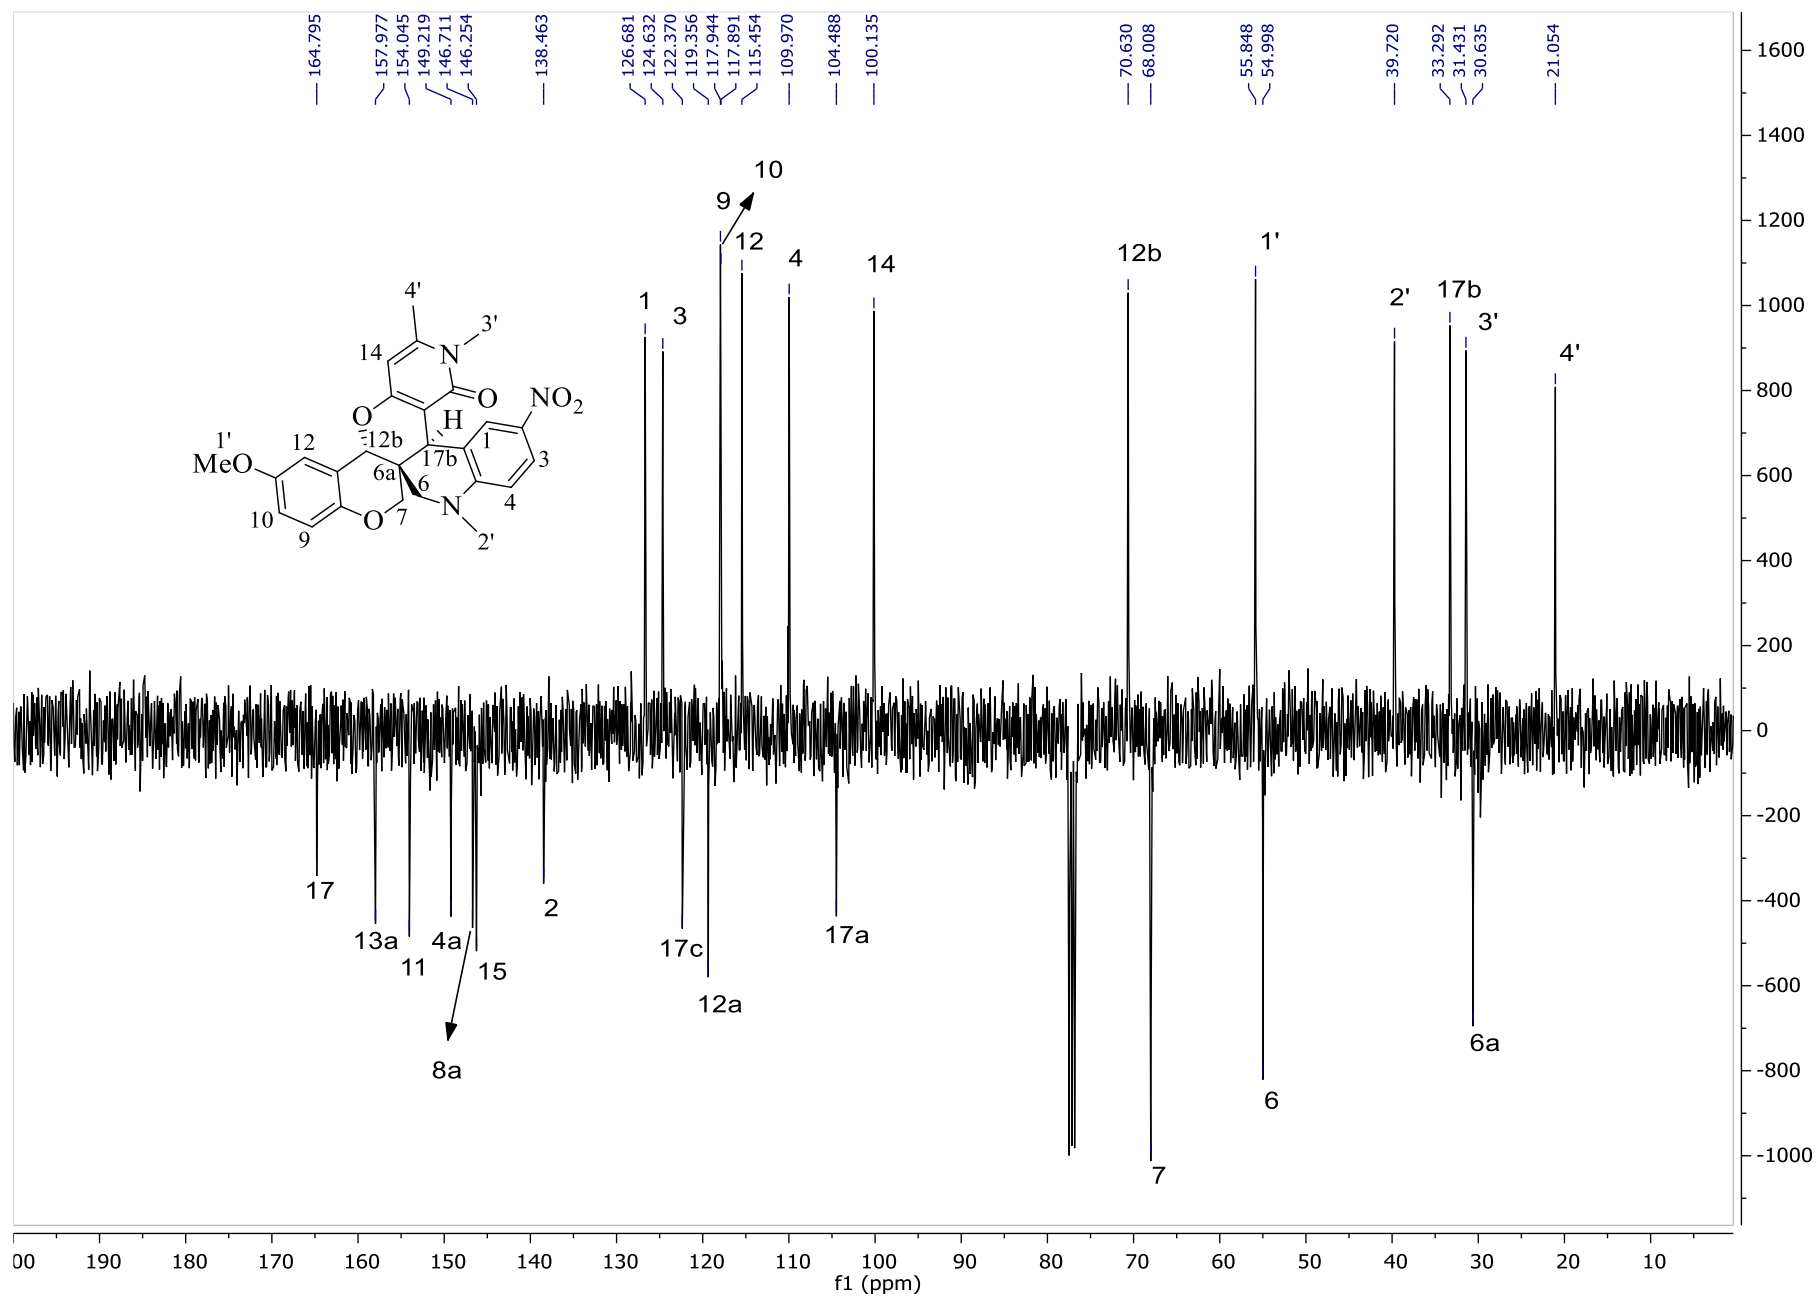

Figure S127.  $^{13}\text{C}$ -NMR spectrum of *rac*-(6a*S*\*,12b*R*\*,17b*S*\*)-4af in  $\text{CDCl}_3$  at 100 MHz.

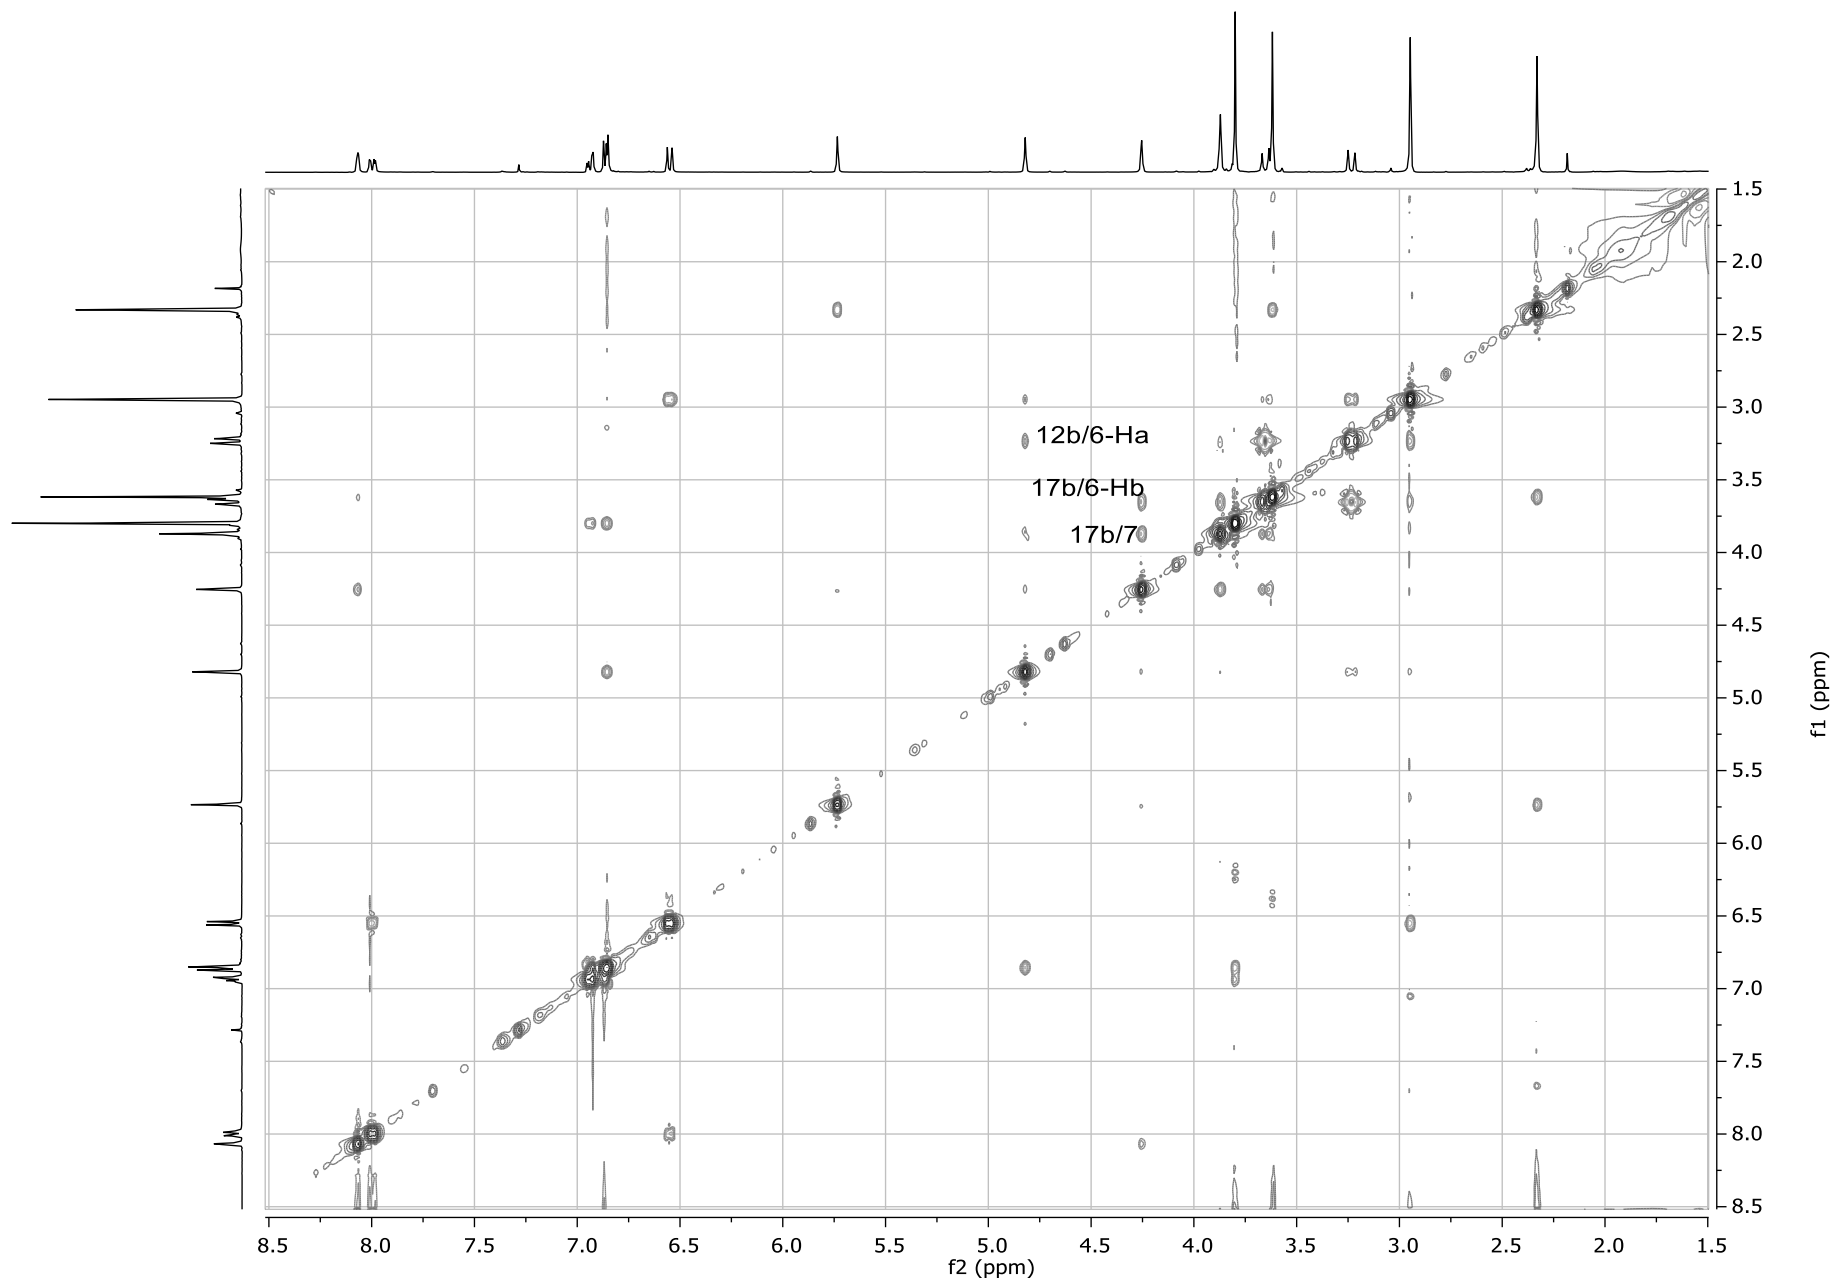

Figure S128. NOESY spectrum of *rac*-(6aS\*,12bR\*,17bS\*)-4af in CDCl<sub>3</sub> at 400 MHz.

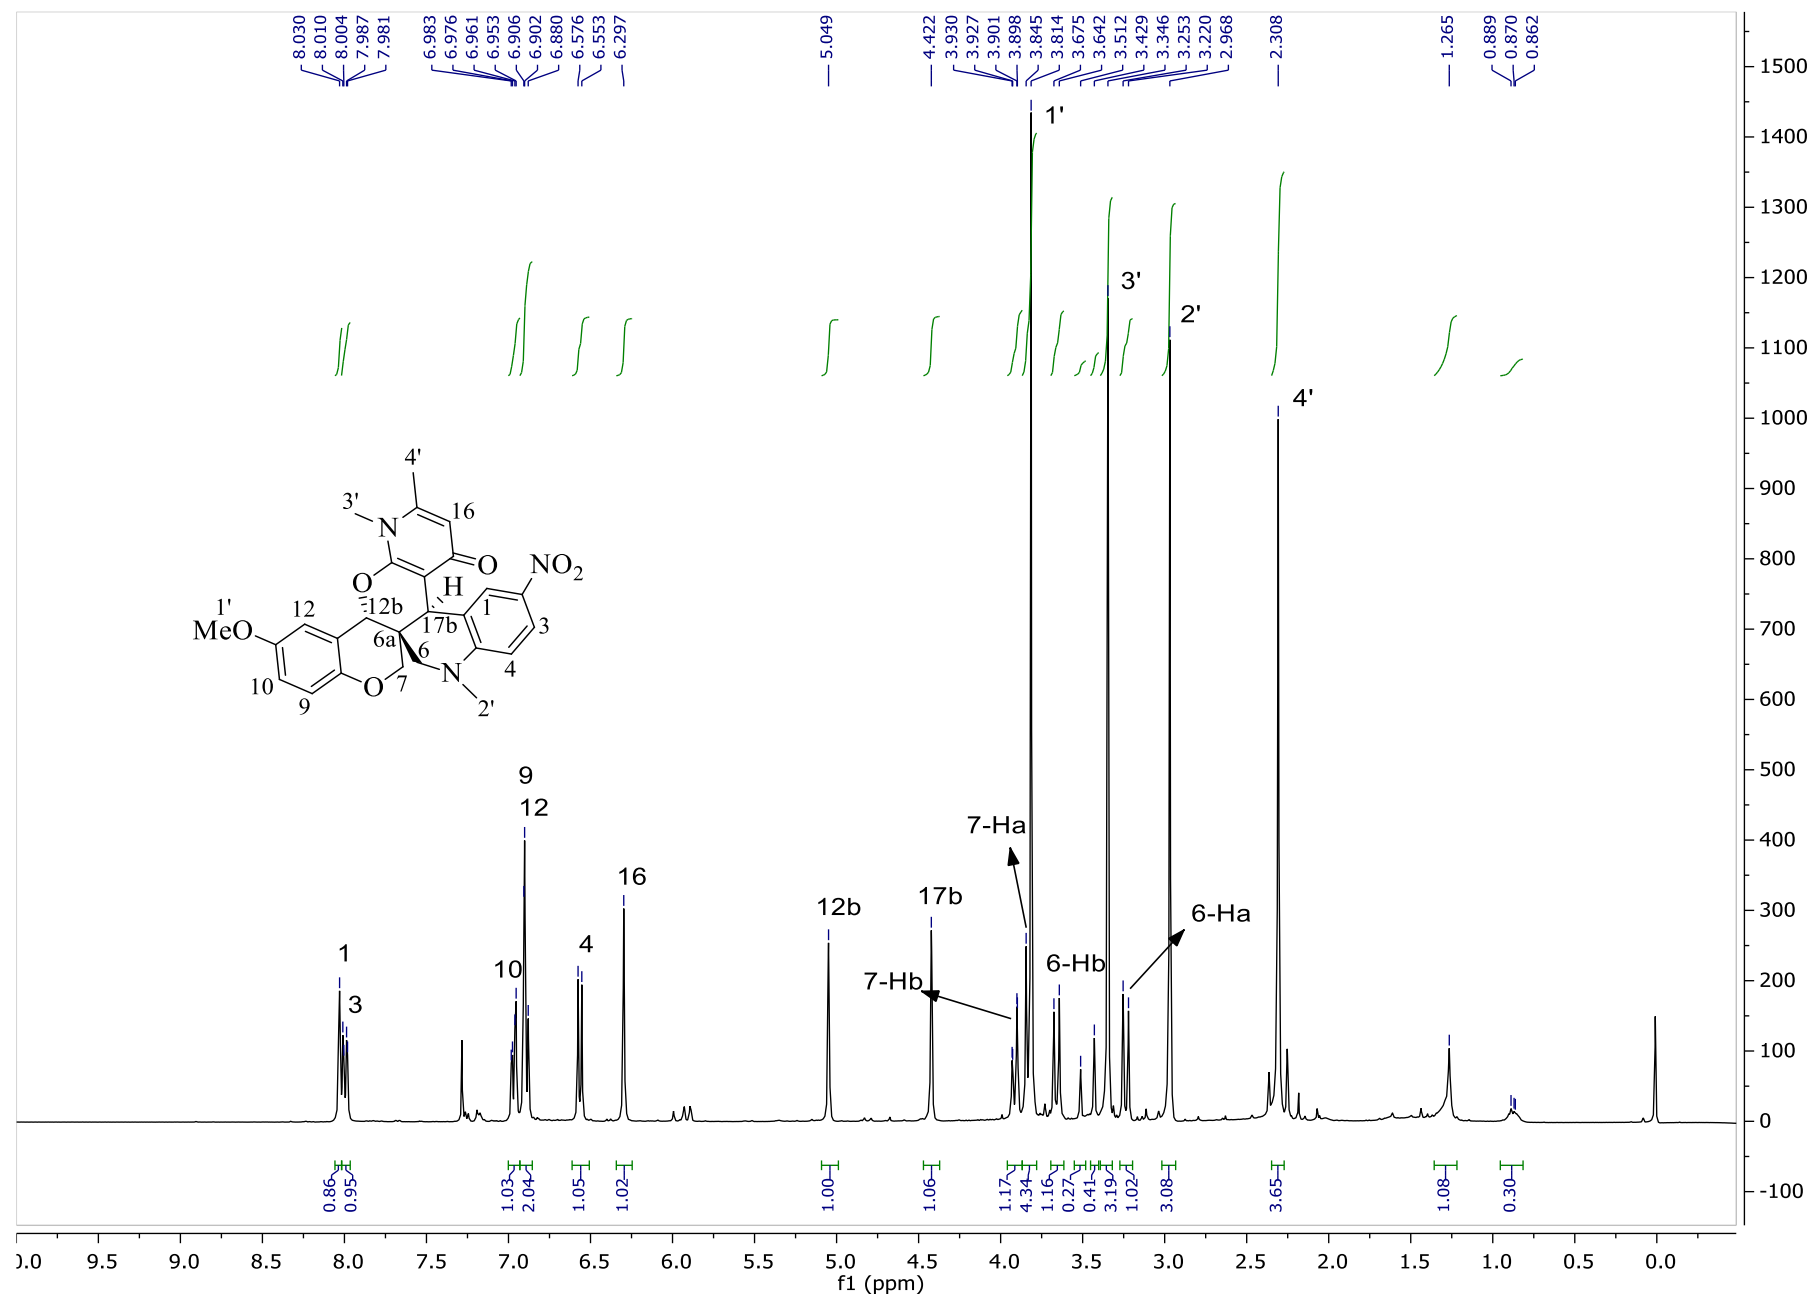

Figure S129. <sup>1</sup>H-NMR spectrum of *rac*-(6a*S*\*,12b*R*\*,17b*S*\*)-**6af** in CDCl<sub>3</sub> at 400 MHz.

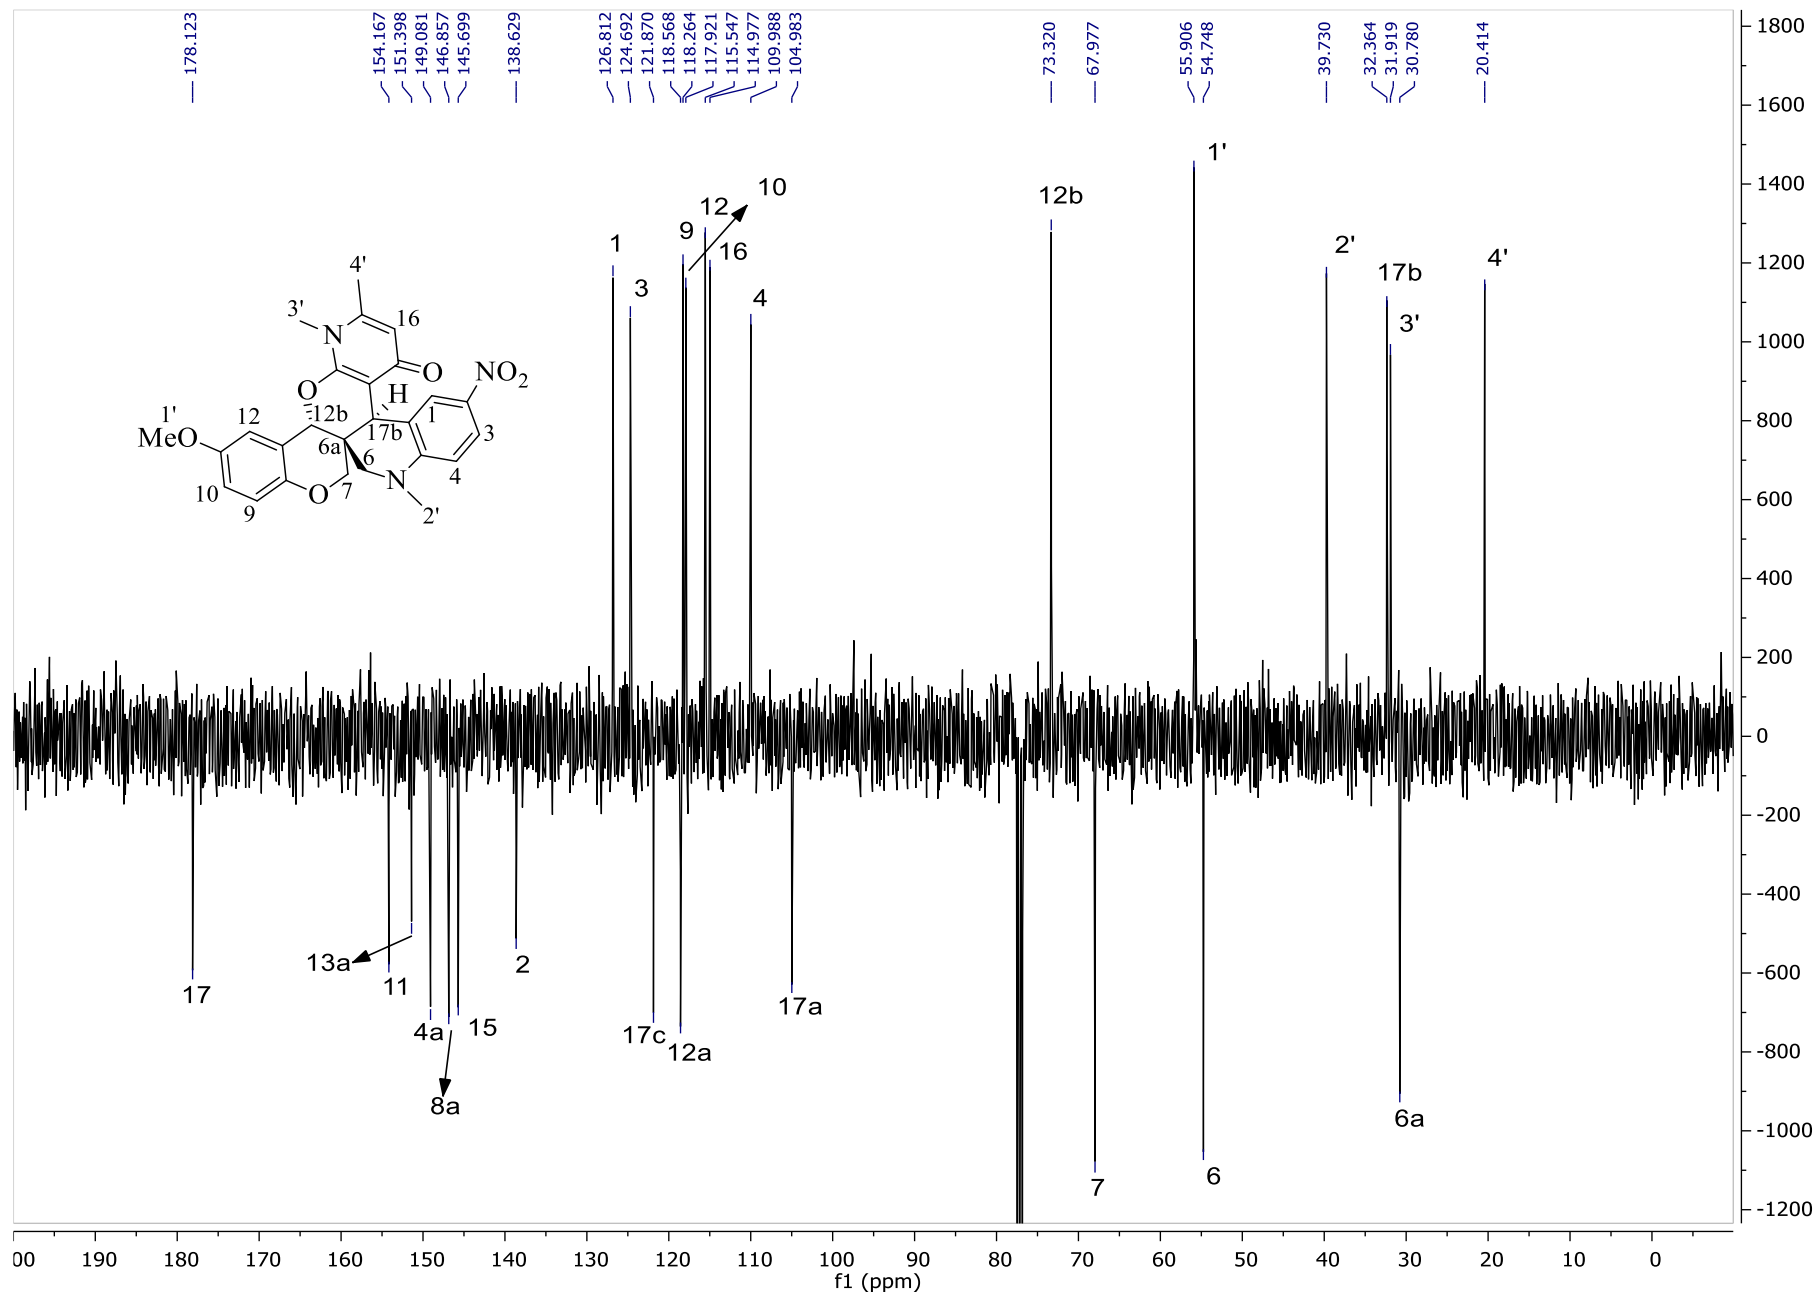

Figure S130.  $^{13}\text{C}$ -NMR spectrum of *rac*-(6a*S*\*,12b*R*\*,17b*S*\*)-6af in  $\text{CDCl}_3$  at 100 MHz.

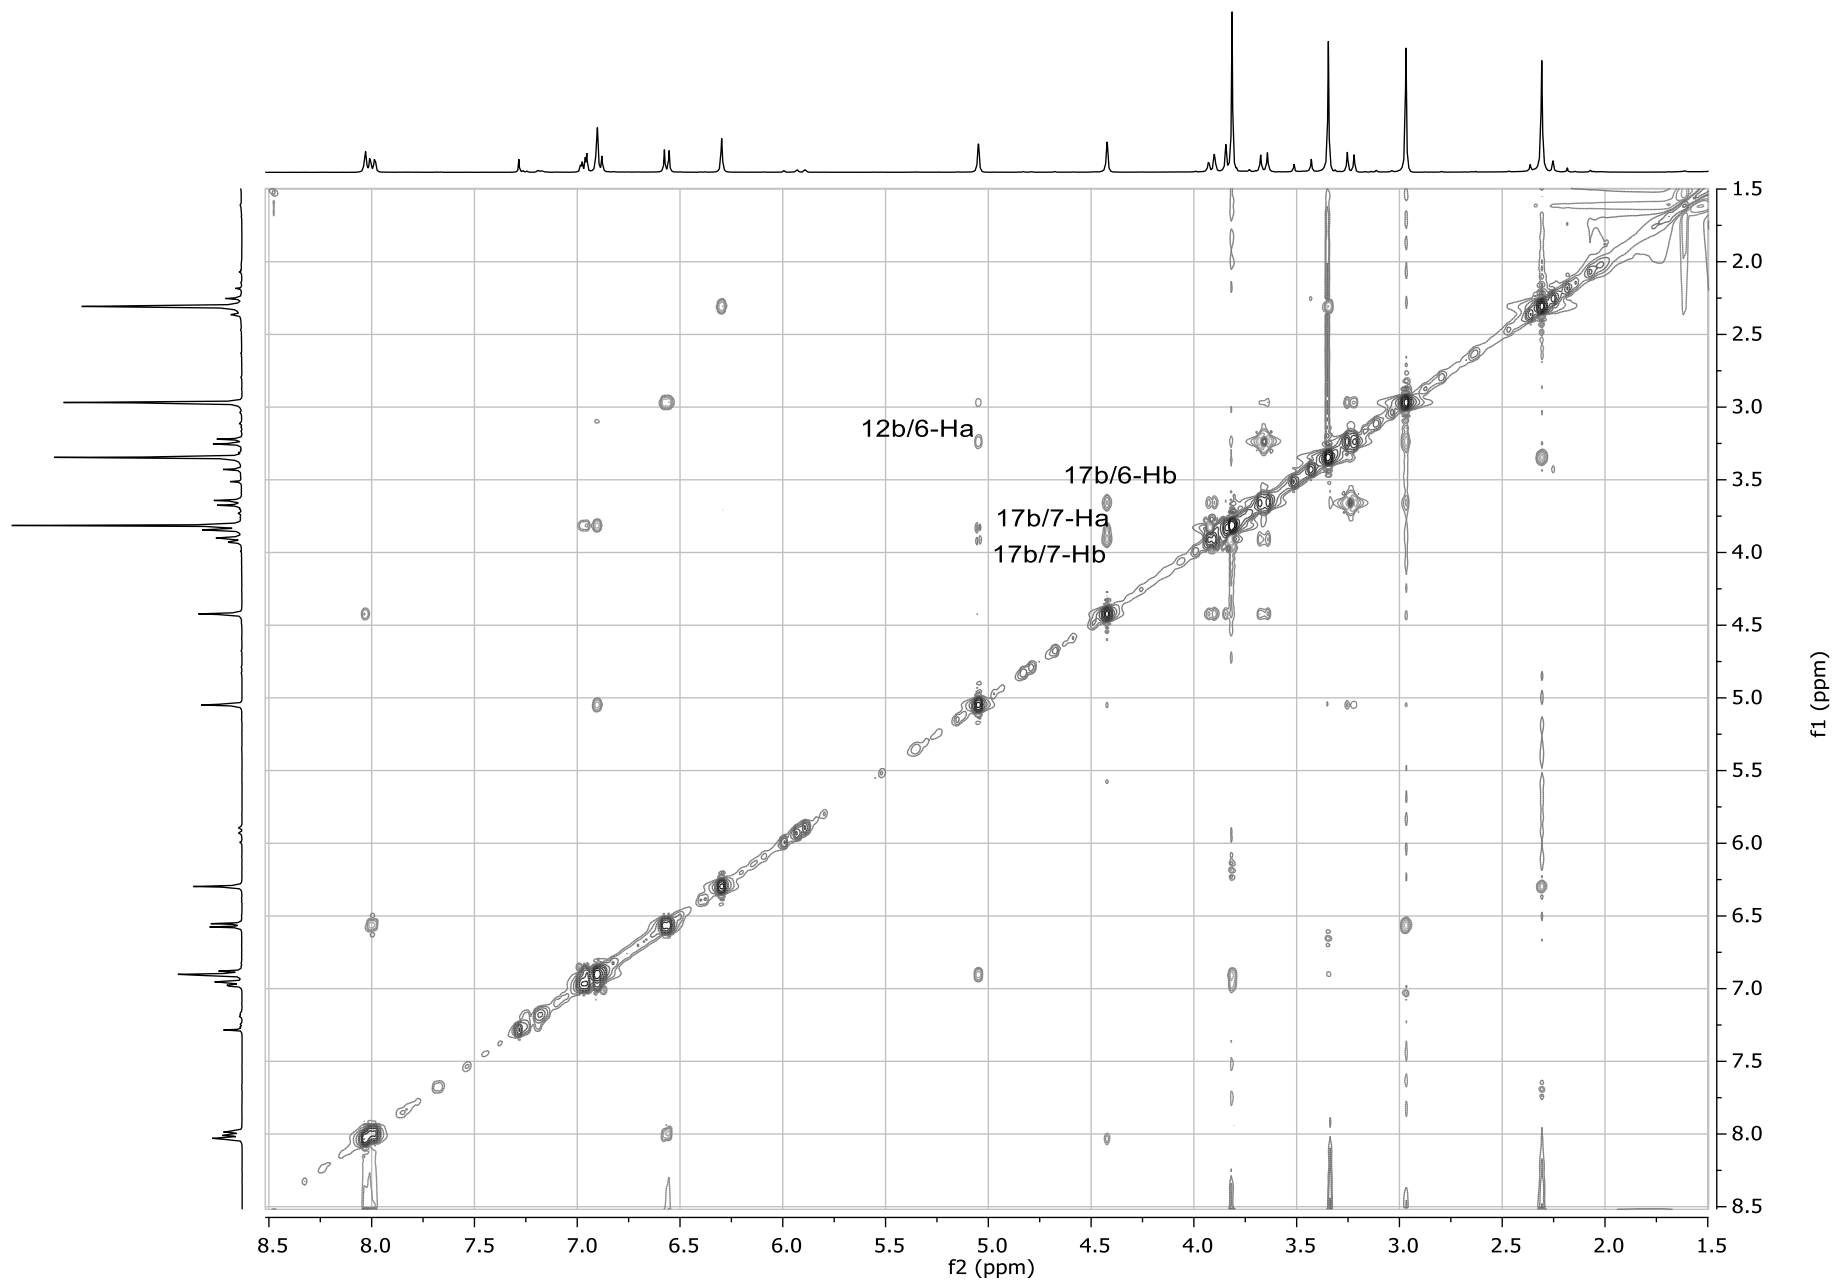

Figure S131. NOESY spectrum of *rac*-(6a*S*\*,12b*R*\*,17b*S*\*)-6af in CDCl<sub>3</sub> at 400 MHz.

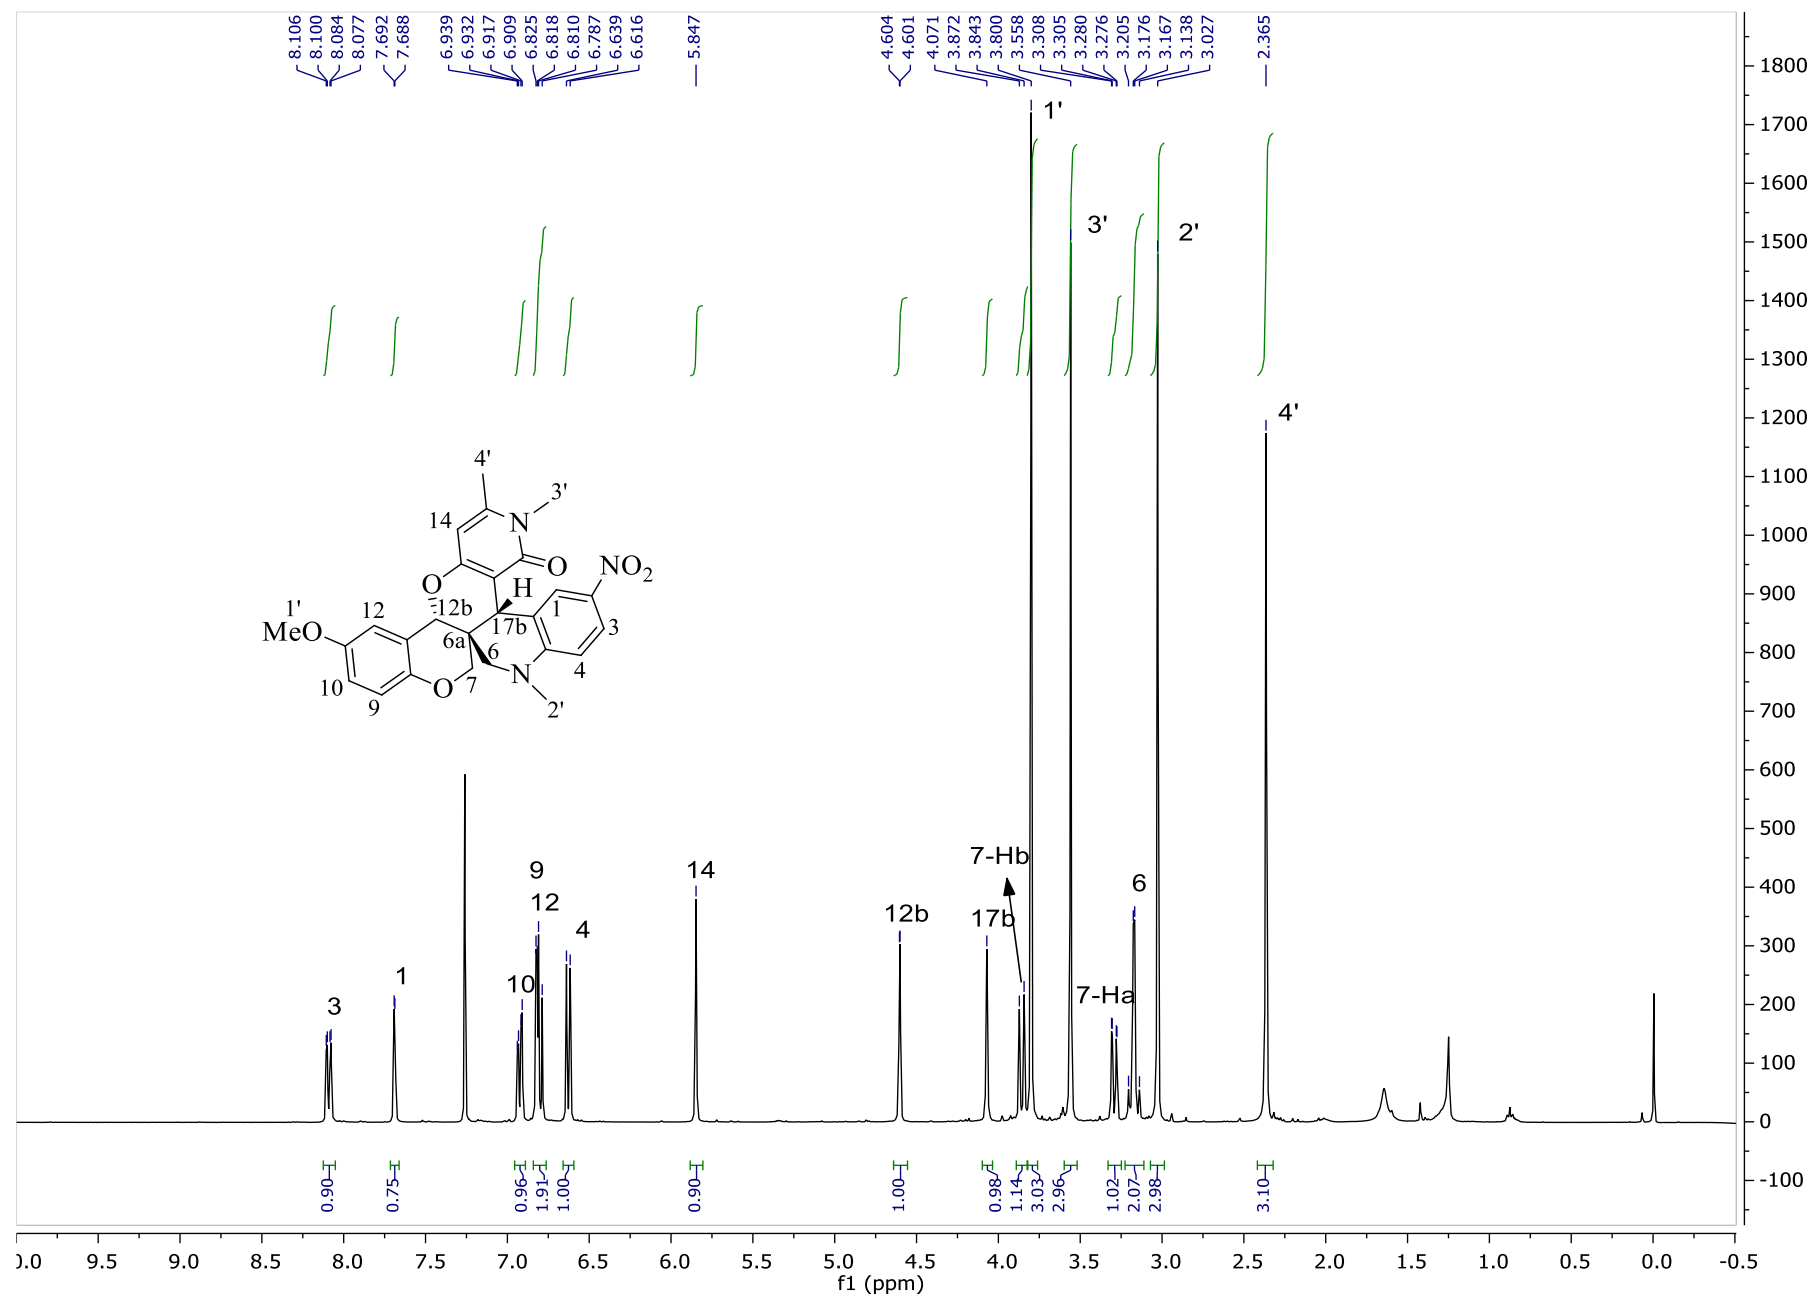

Figure S132. <sup>1</sup>H-NMR spectrum of *rac*-(6a*S*\*,12b*R*\*,17b*R*\*)-**5af** in CDCl<sub>3</sub> at 400 MHz.

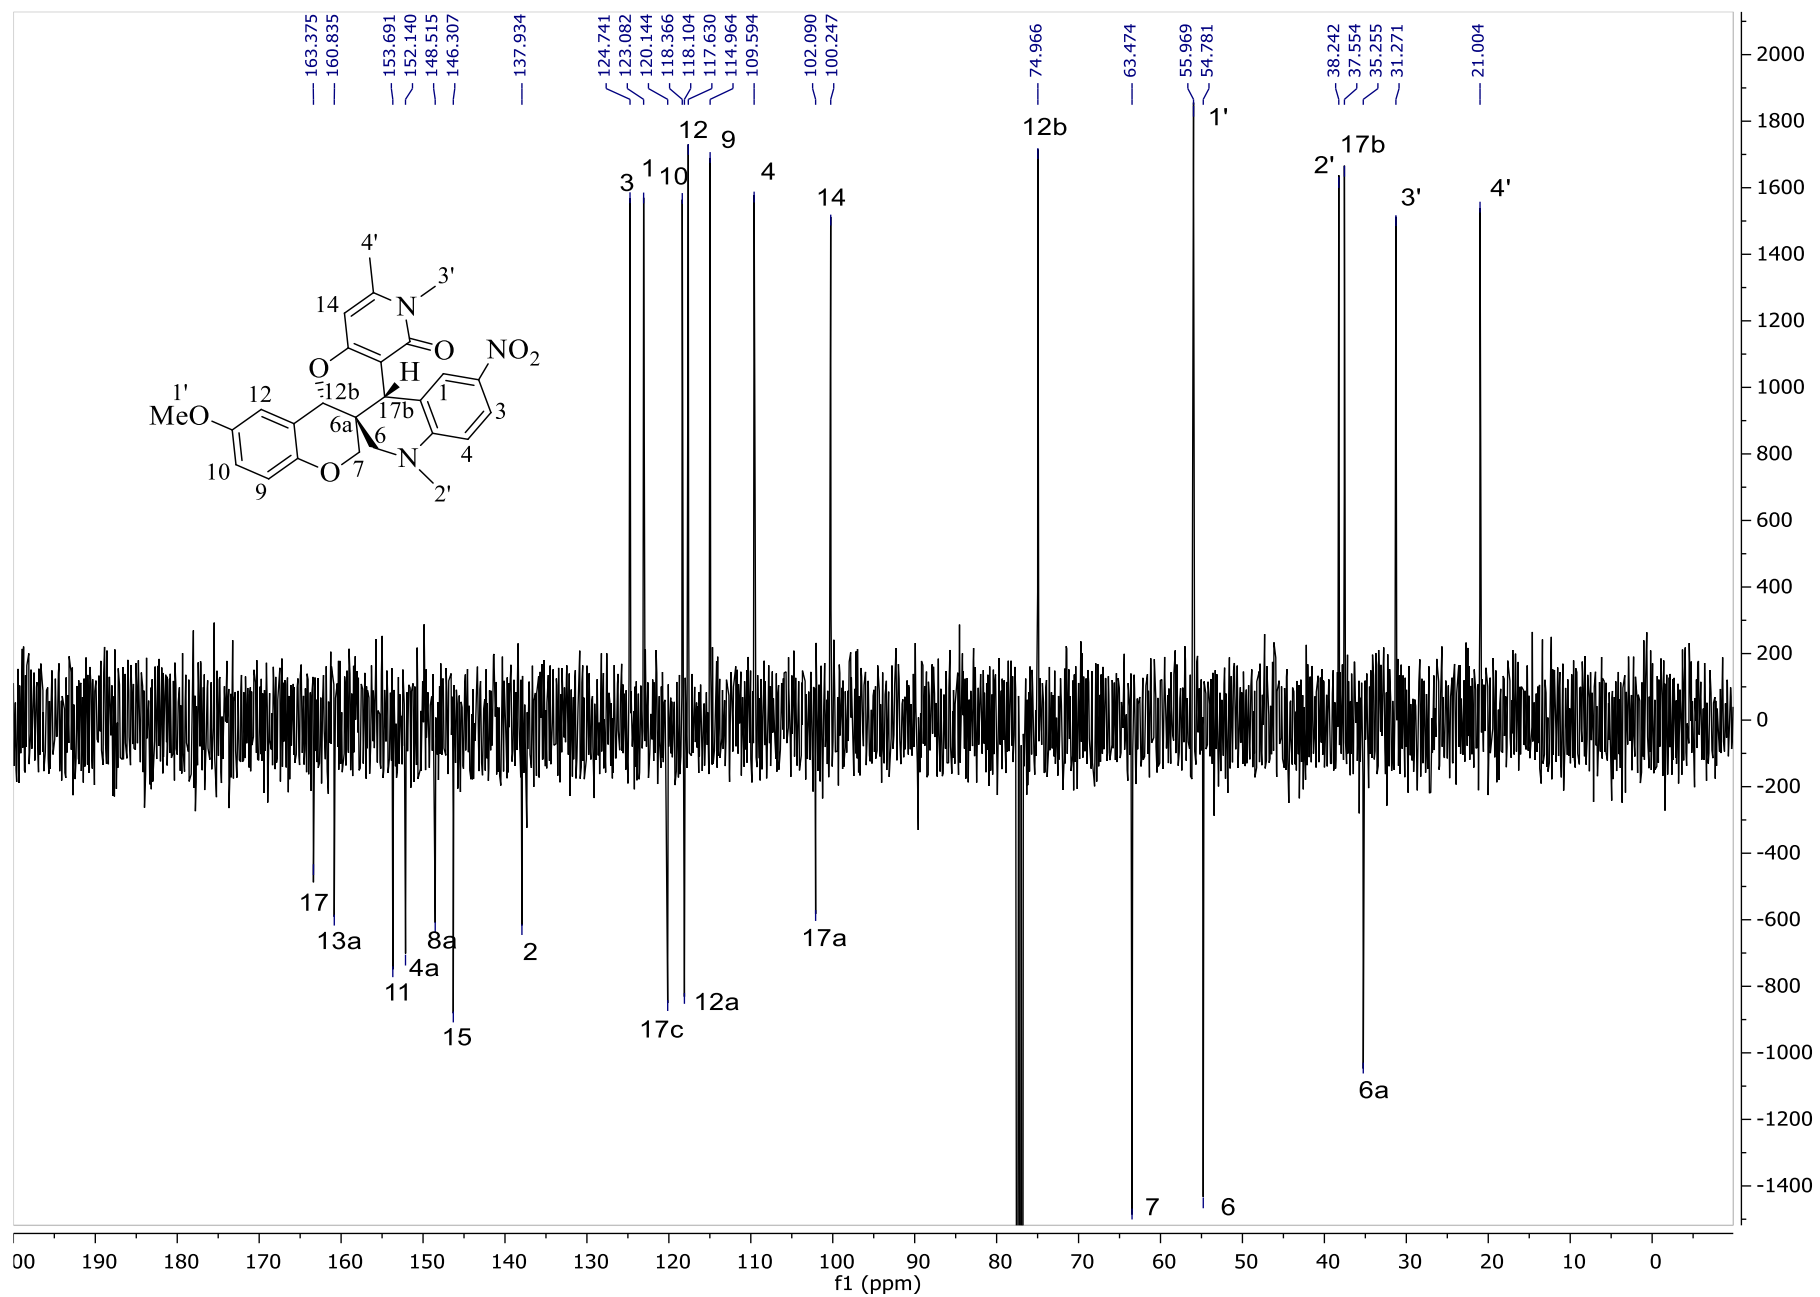

Figure S133.  $^{13}\text{C}$ -NMR spectrum of *rac*-(6a*S*\*,12b*R*\*,17b*R*\*)-5af in  $\text{CDCl}_3$  at 100 MHz.

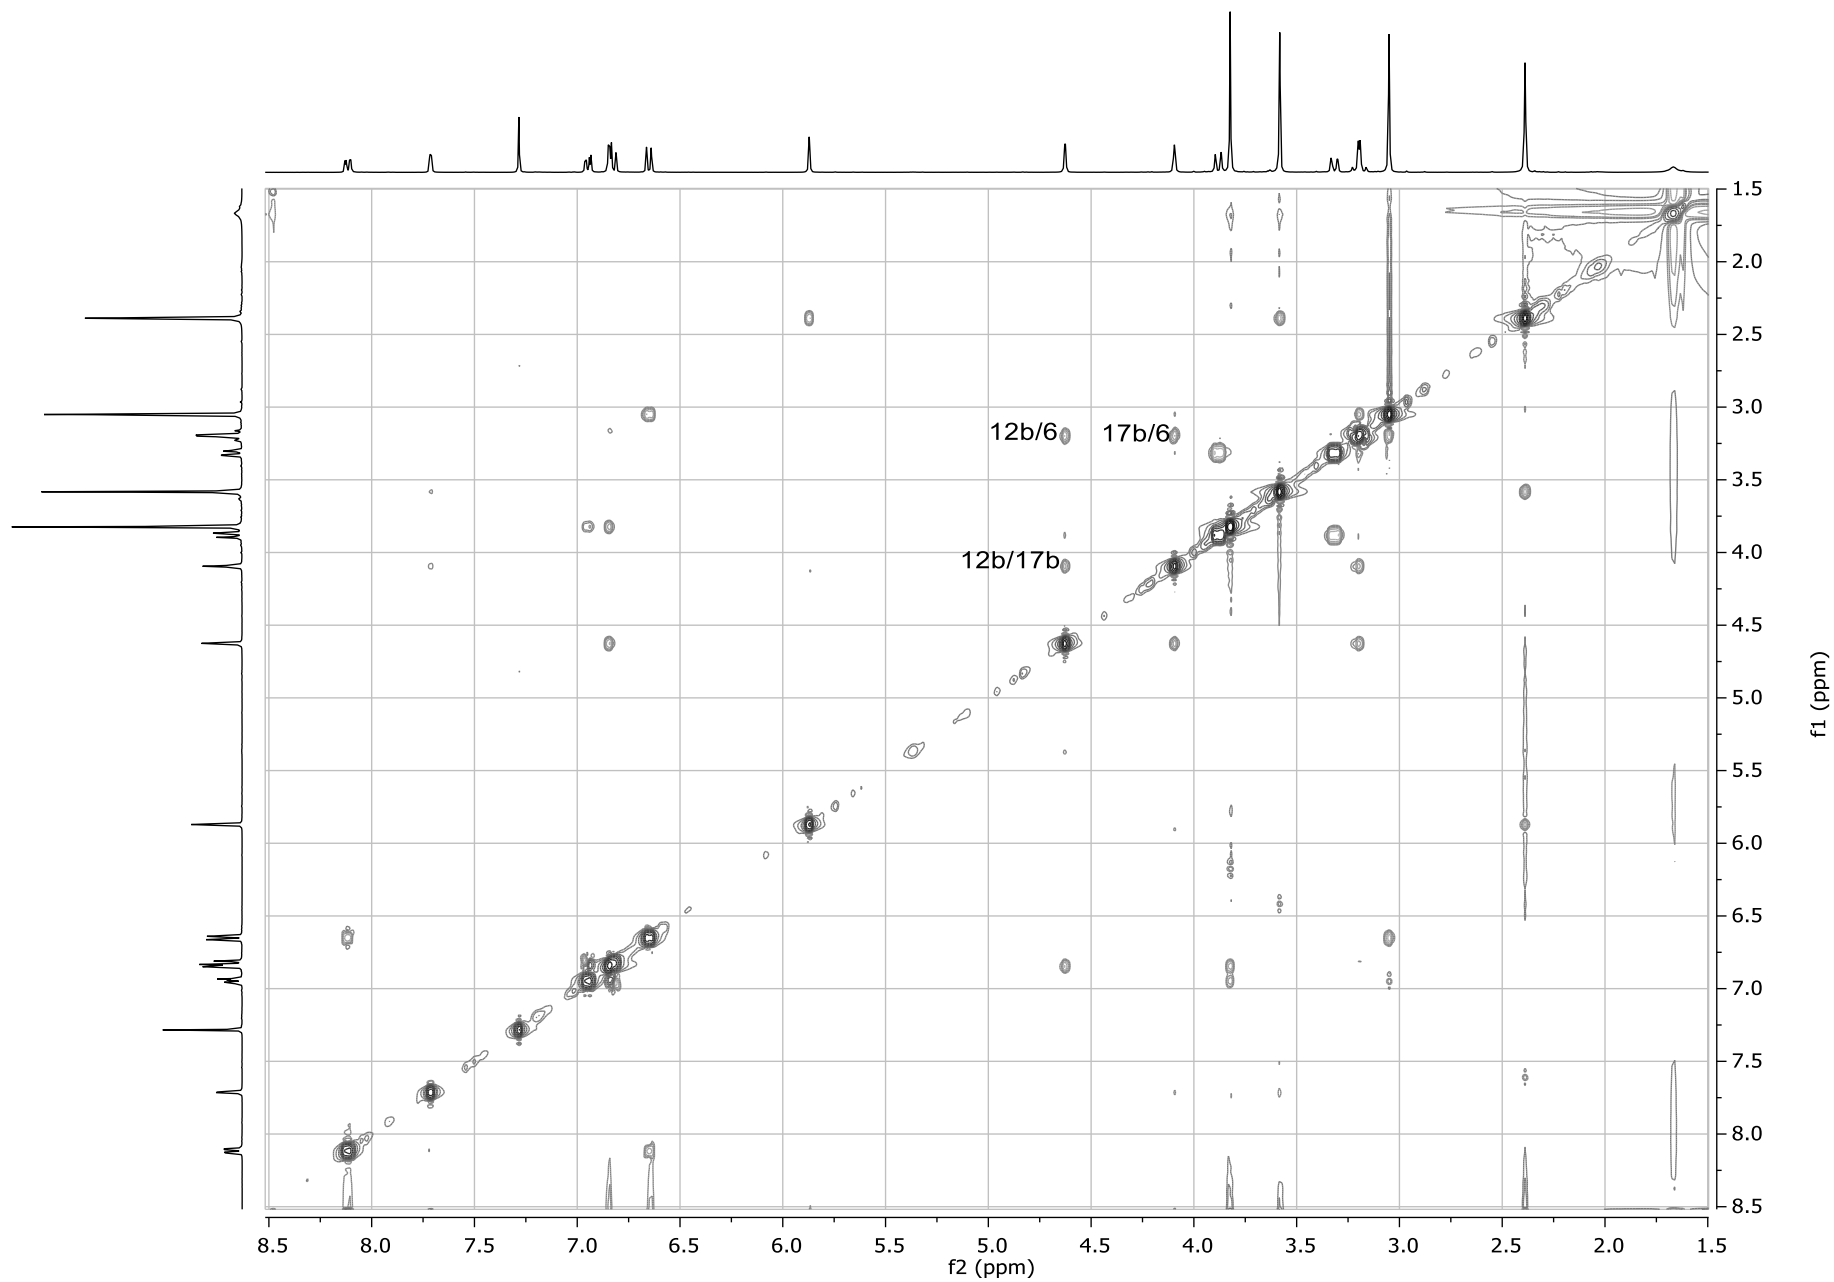

Figure S134. NOESY spectrum of *rac*-(6a*S*\*,12b*R*\*,17b*R*\*)-5af in CDCl<sub>3</sub> at 400 MHz.

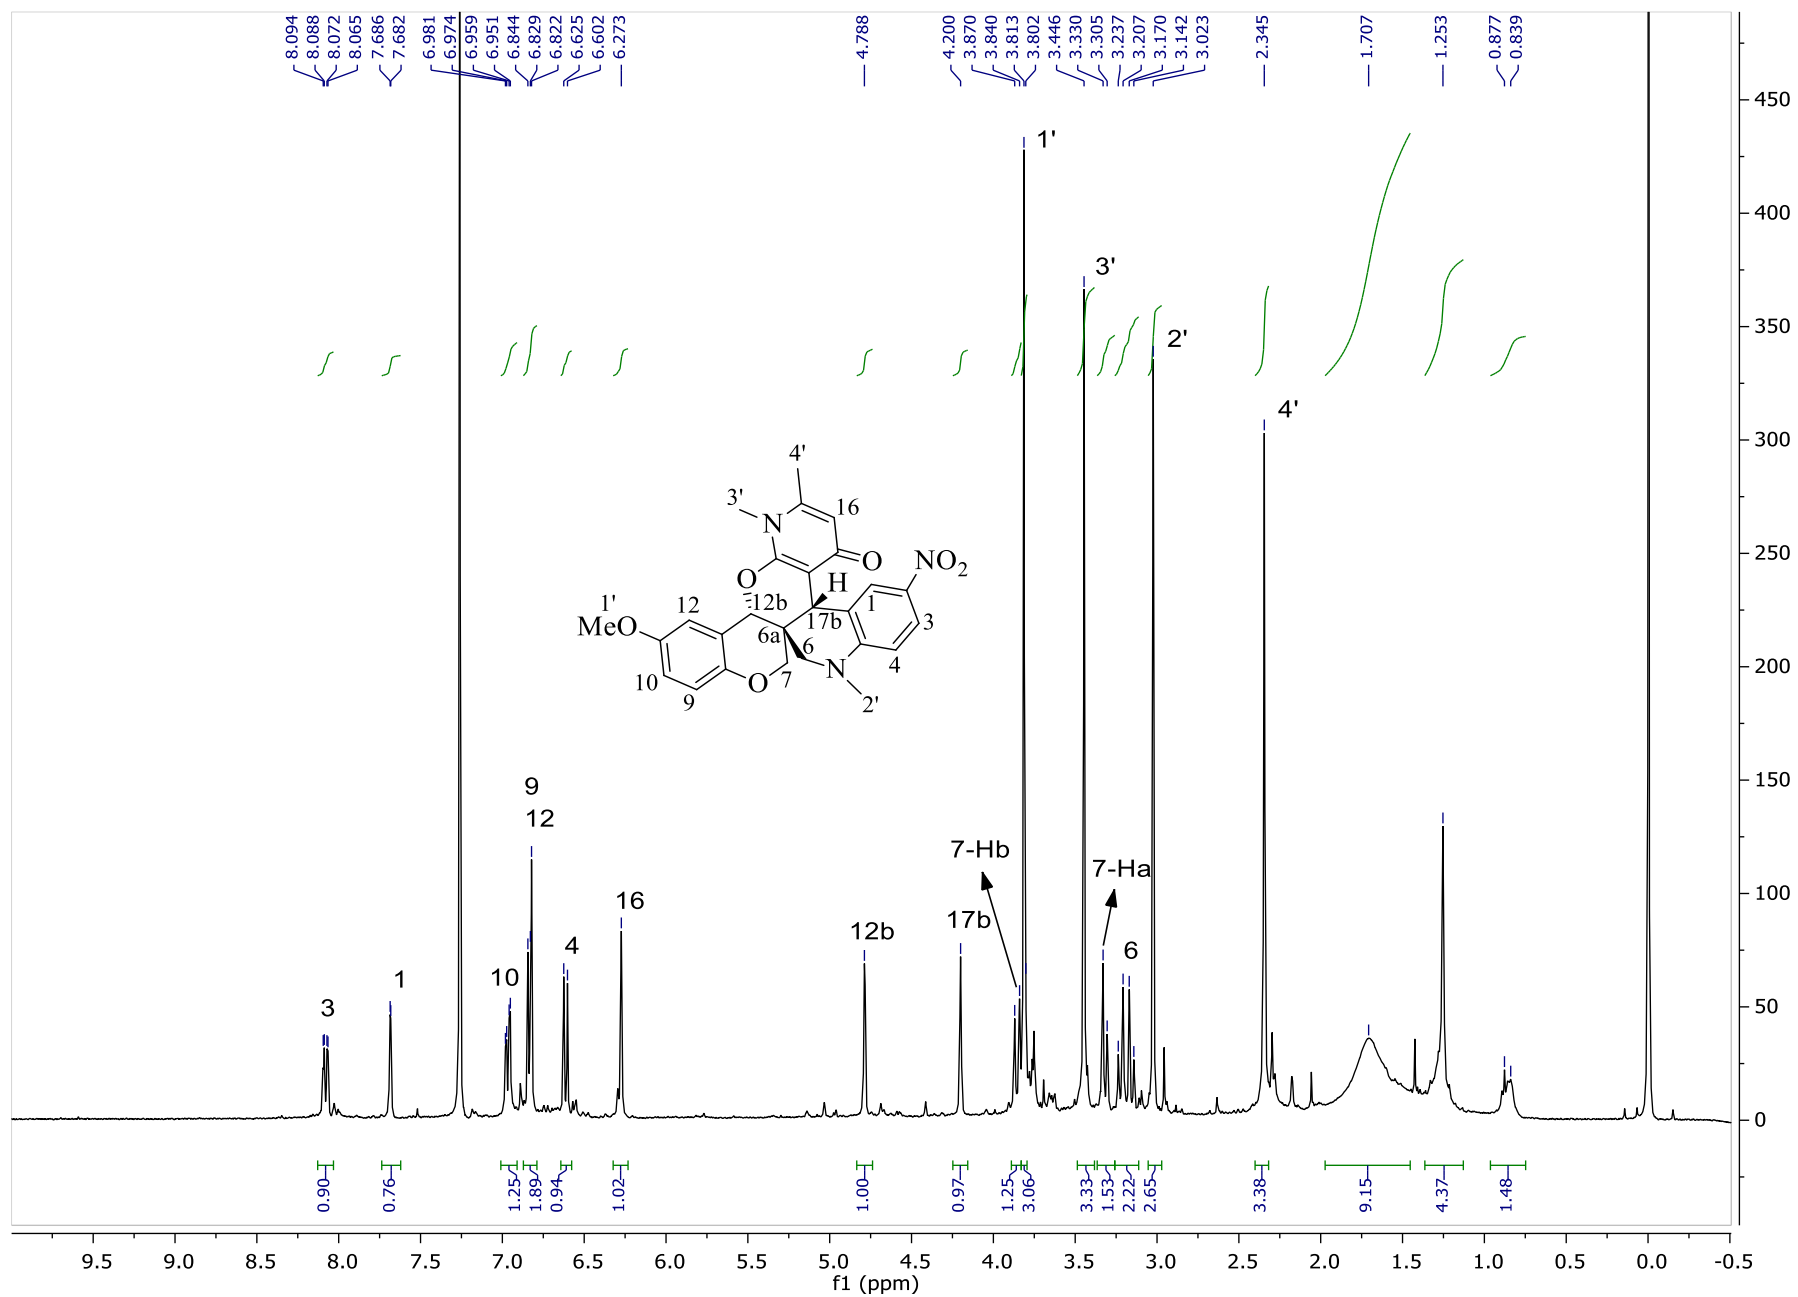

Figure S135. <sup>1</sup>H-NMR spectrum of *rac*-(6a*S*\*,12b*R*\*,17b*R*\*)-7af in CDCl<sub>3</sub> at 400 MHz.

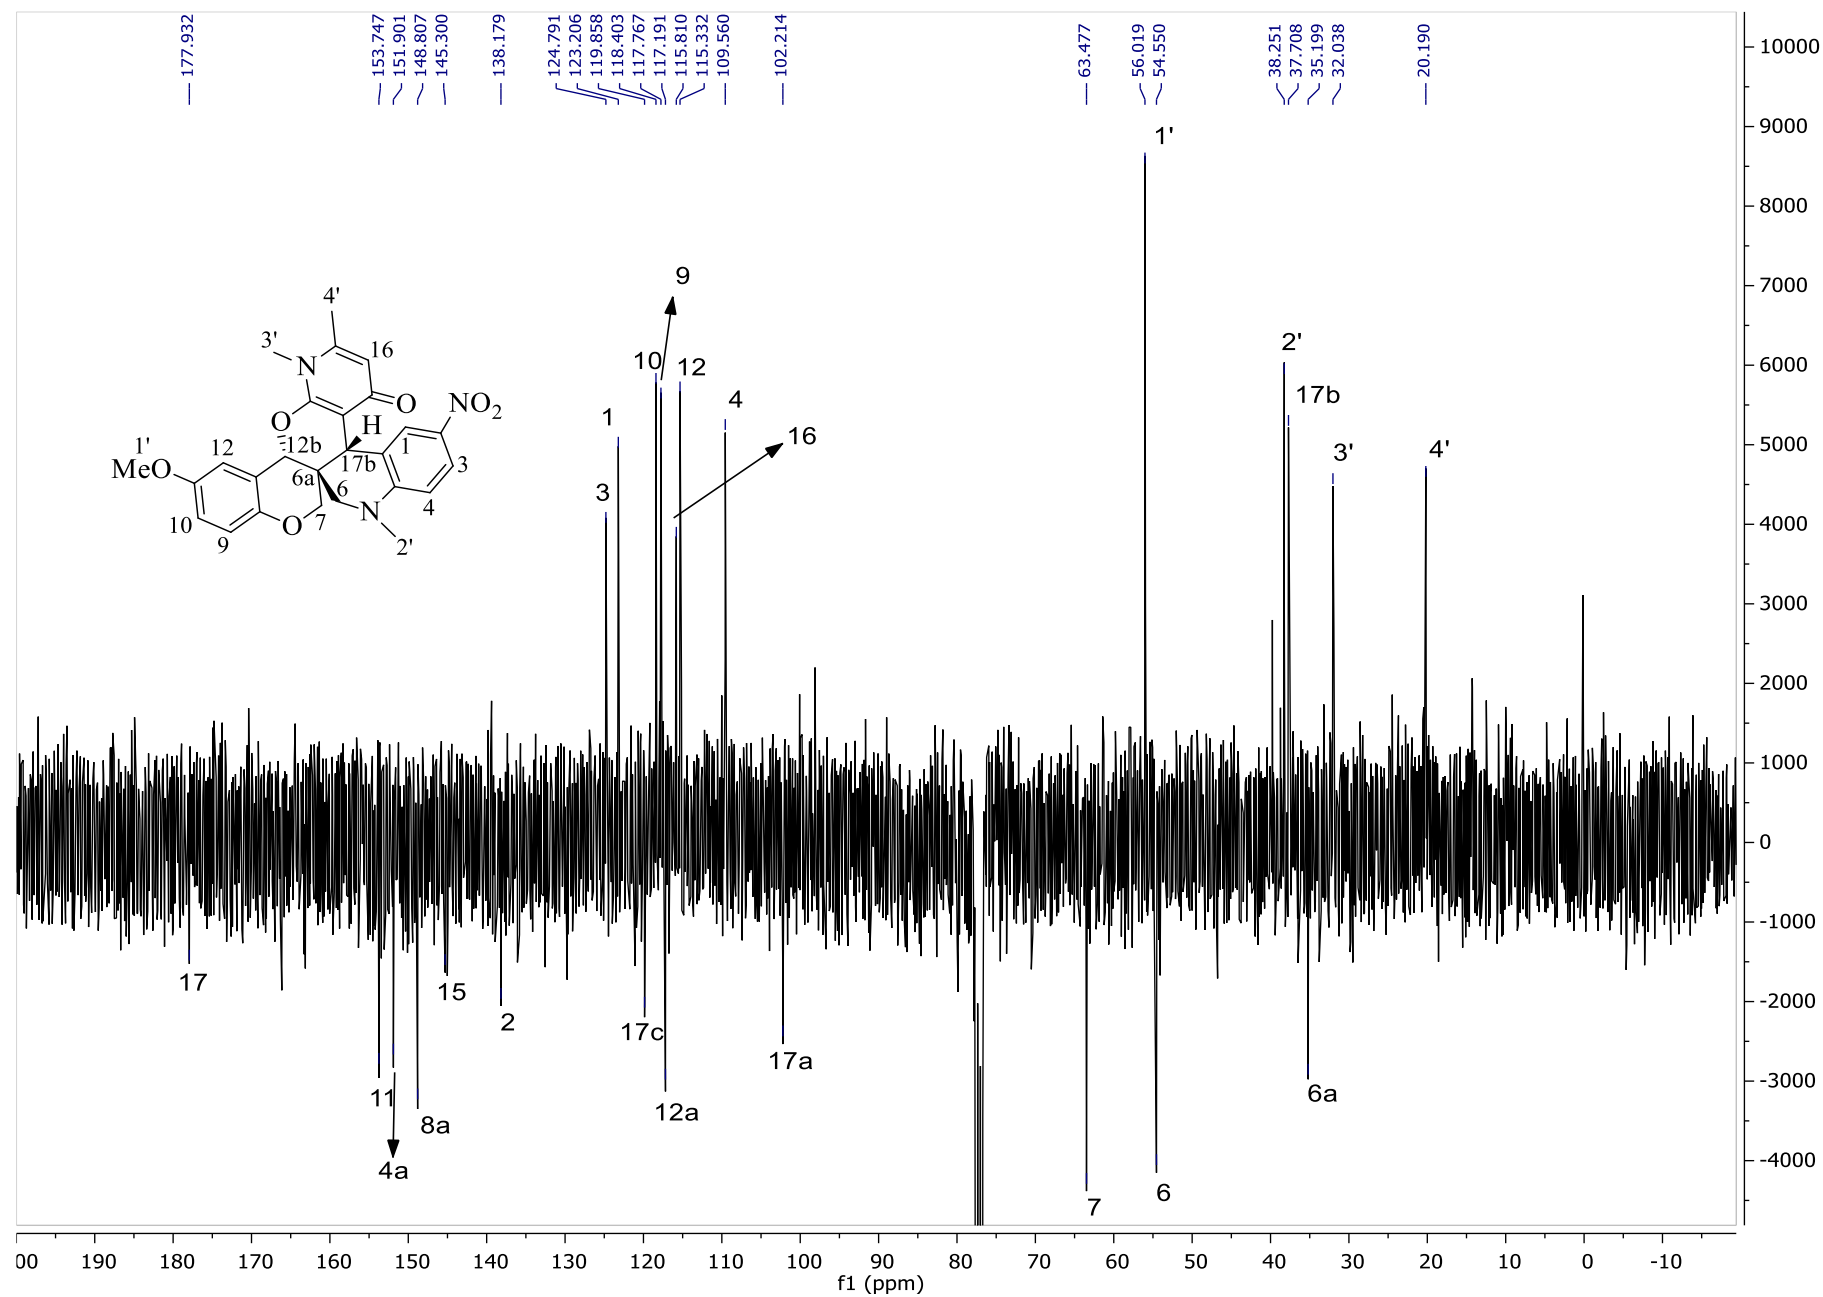

Figure S136.  $^{13}\text{C}$ -NMR spectrum of *rac*-(6a*S*\*,12b*R*\*,17b*R*\*)-7af in CDCl<sub>3</sub> at 90 MHz.

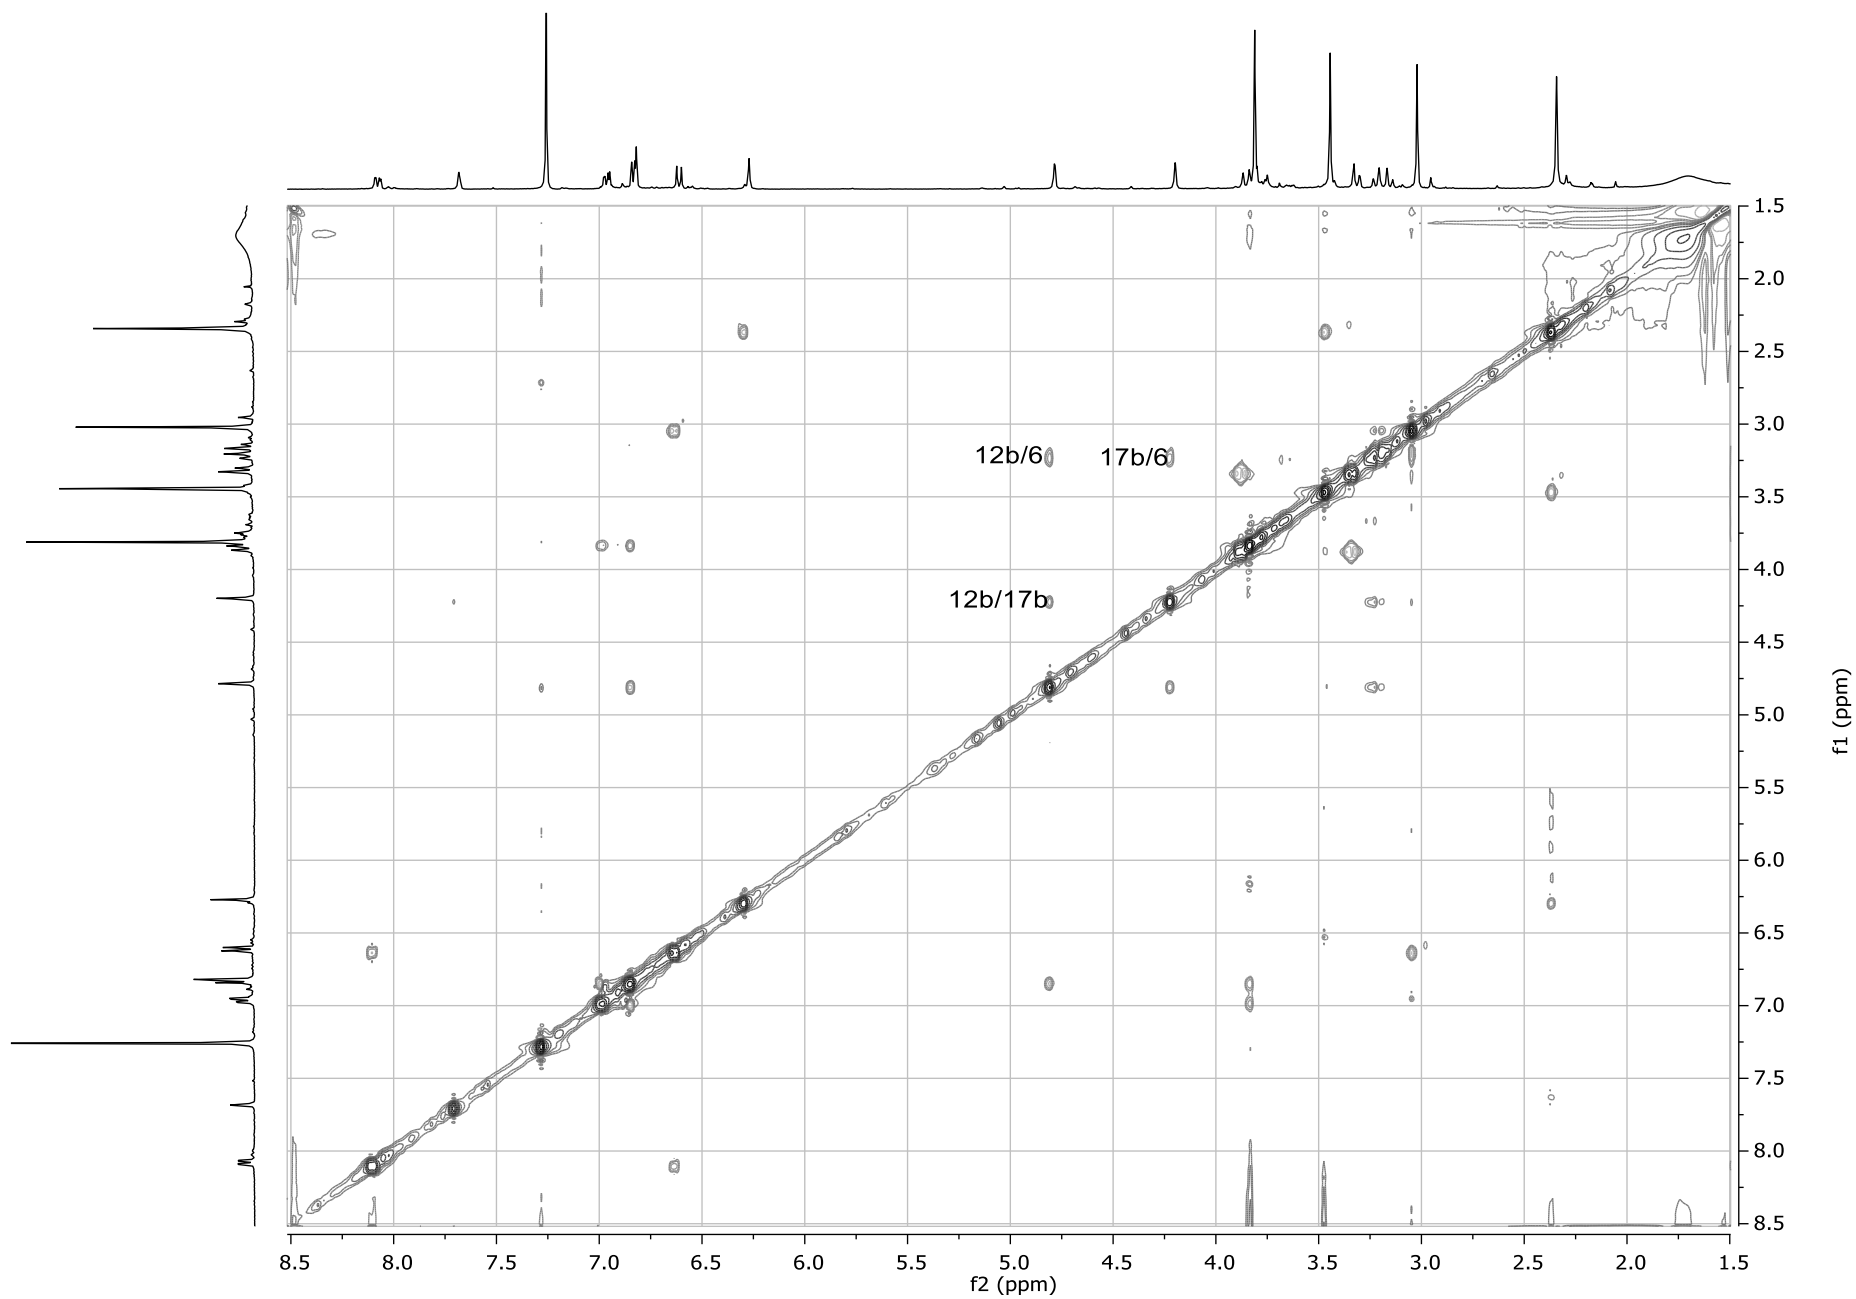

Figure S137. NOESY spectrum of *rac*-(6a*S*\*,12b*R*\*,17b*R*\*)-7af in CDCl<sub>3</sub> at 400 MHz.

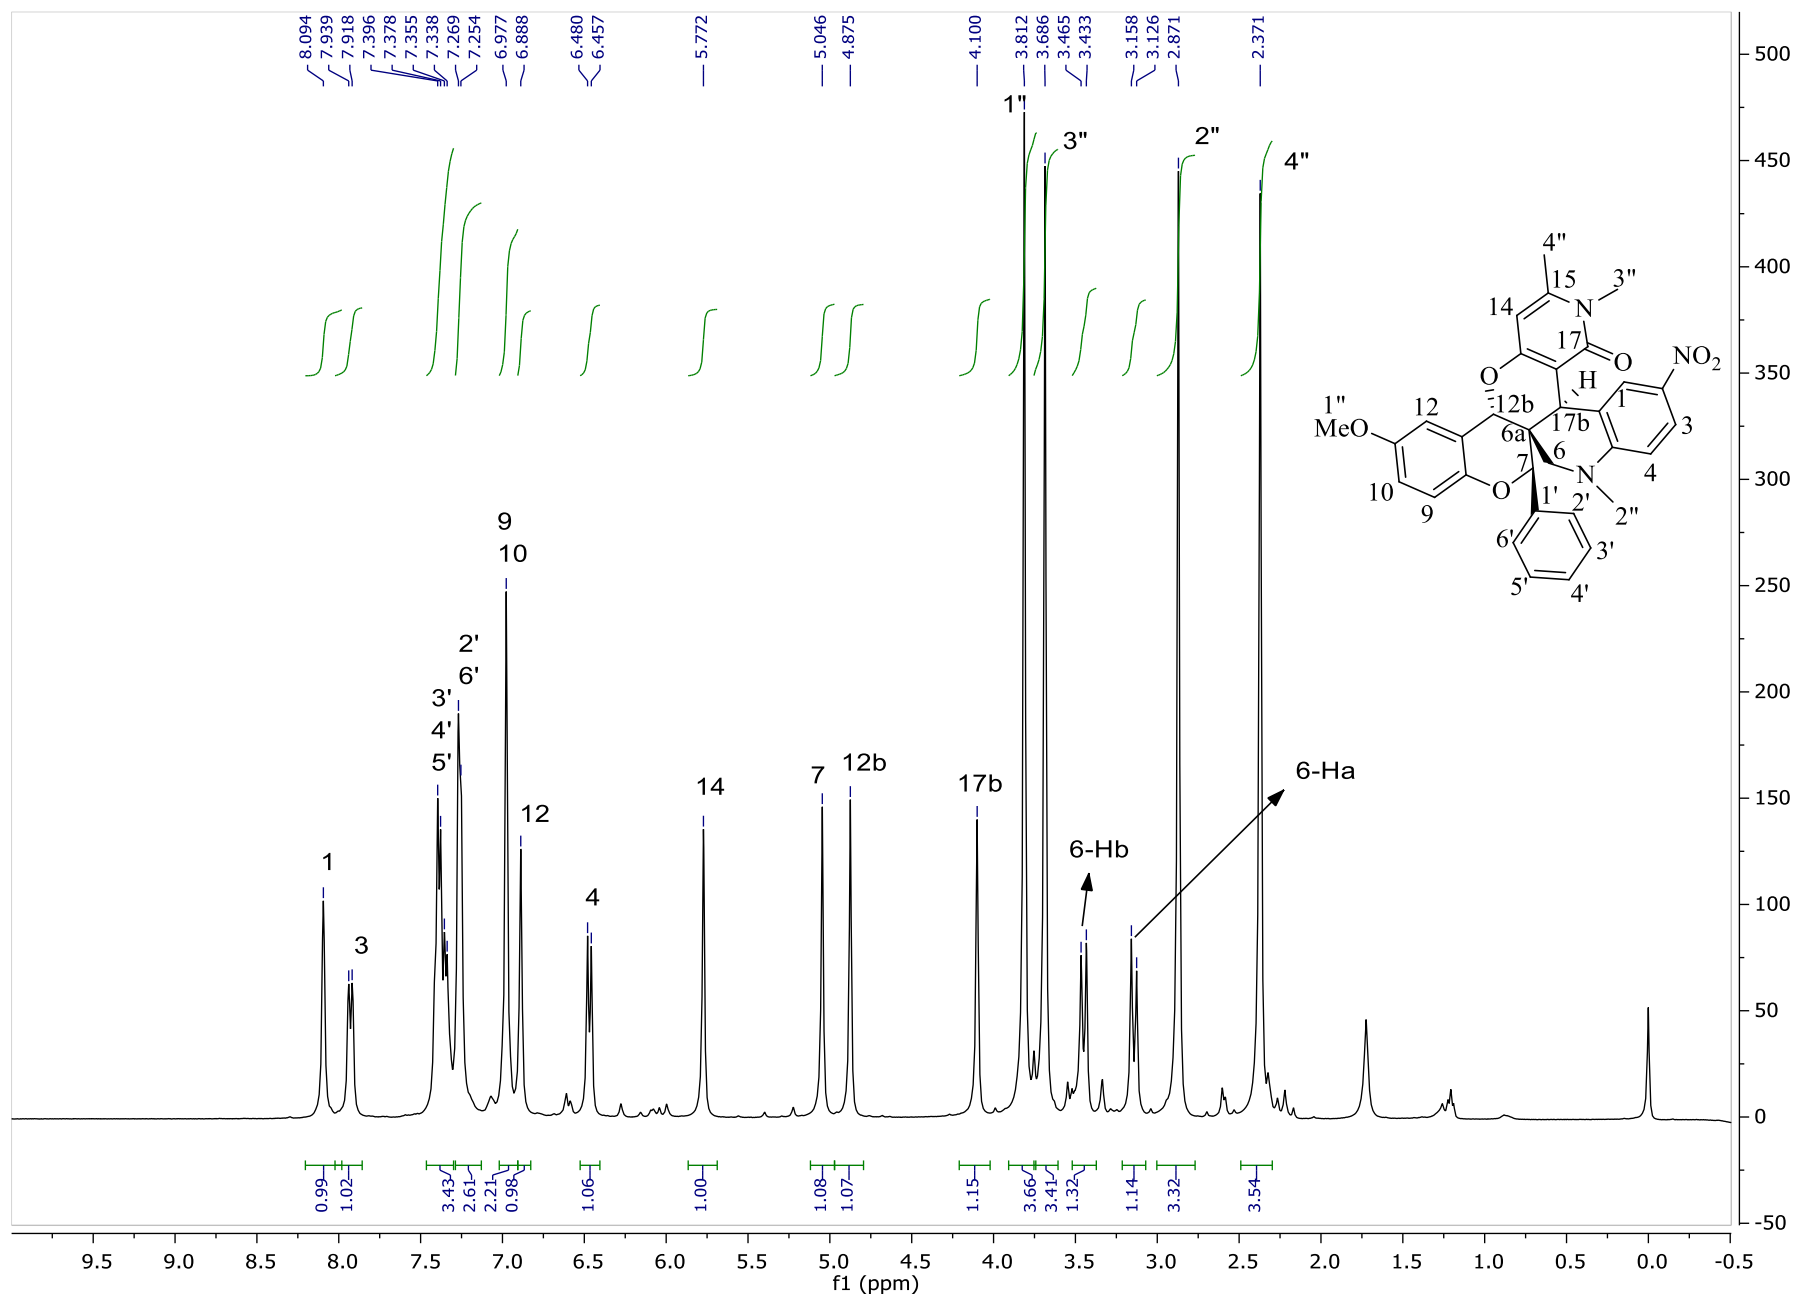

Figure S138. <sup>1</sup>H-NMR spectrum of *rac*-(6a*S*\*,7*R*\*,12b*R*\*,19b*S*\*)-4bf in CDCl<sub>3</sub> at 400 MHz.

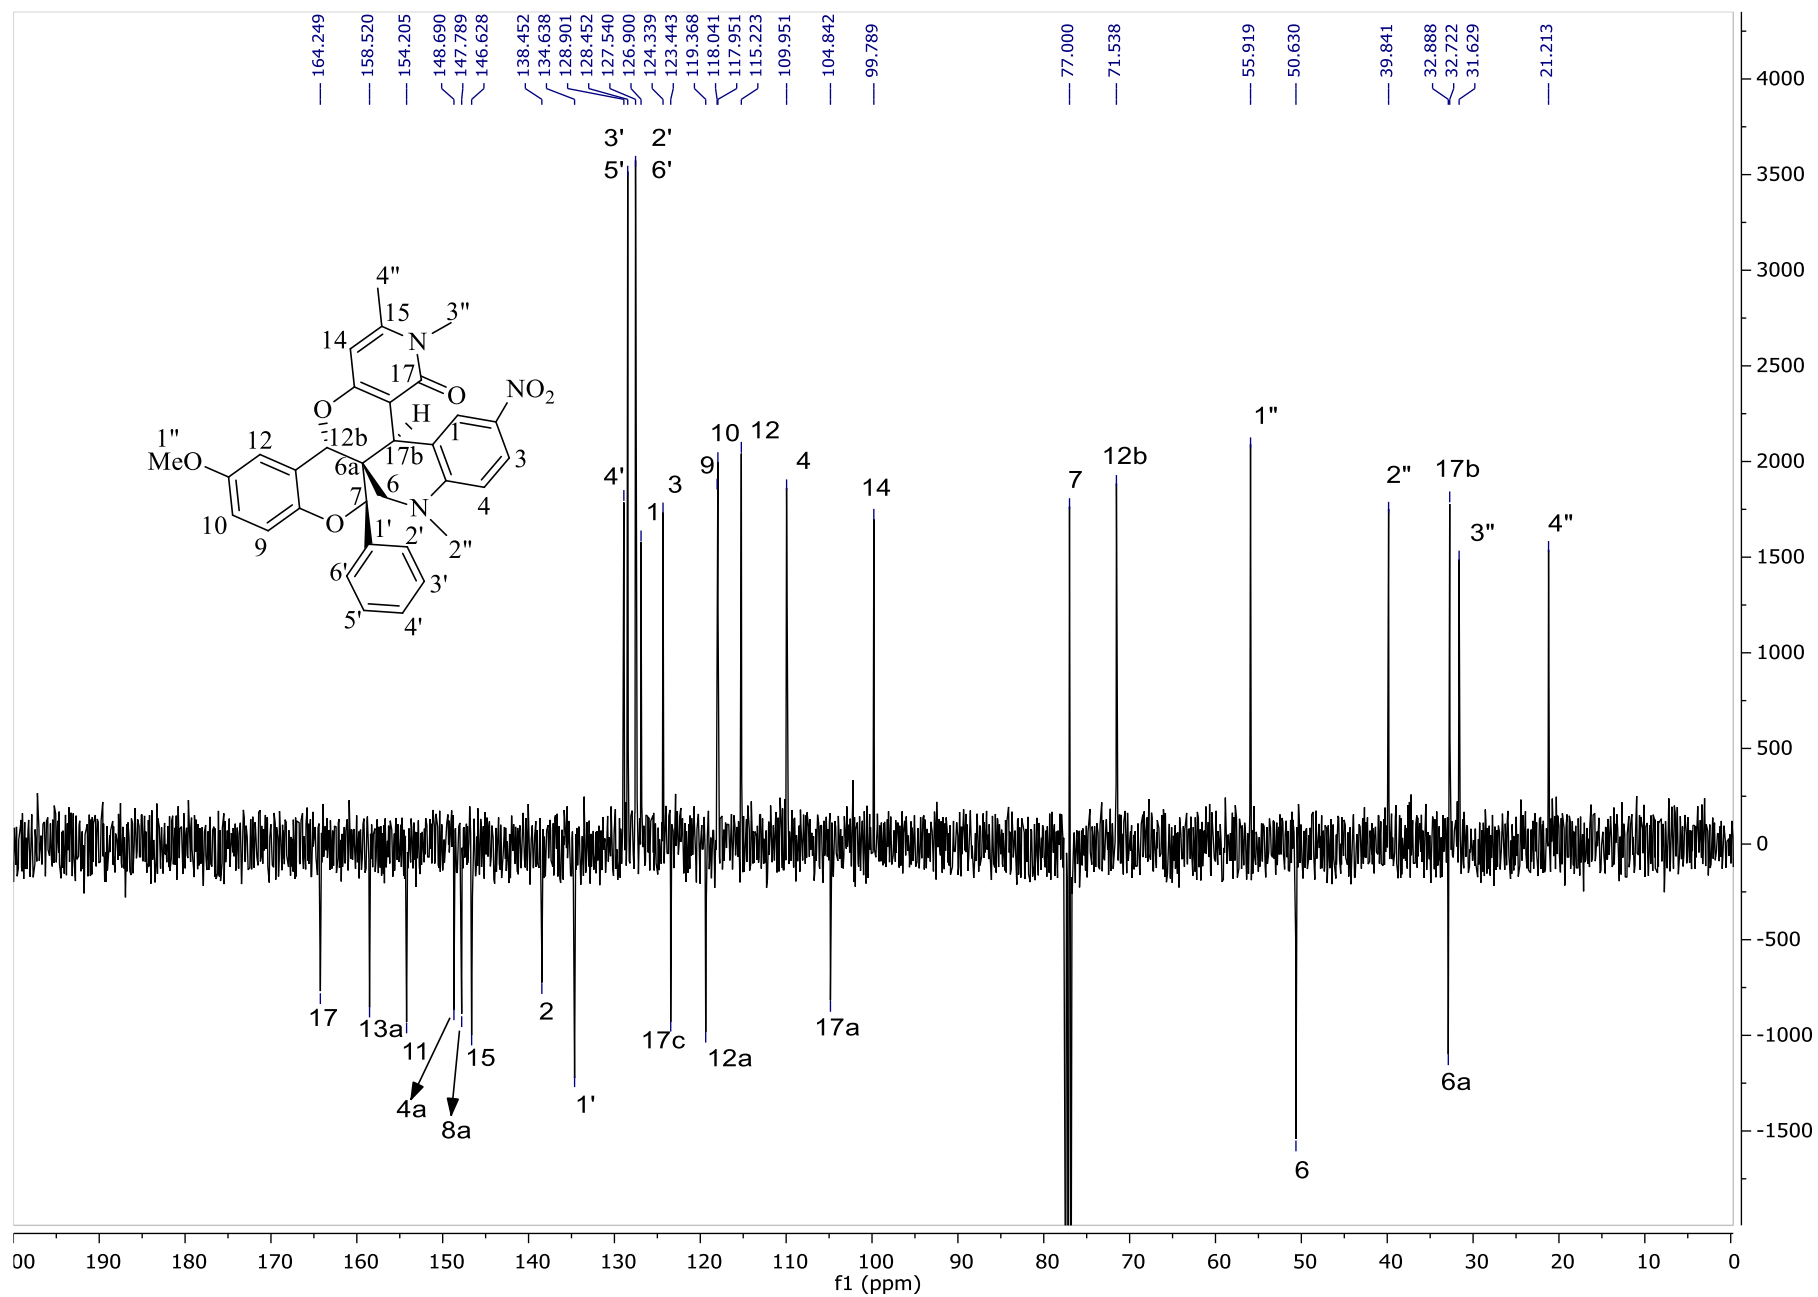

Figure S139.  $^{13}\text{C}$ -NMR spectrum of *rac*-(6a*S*\*,7*R*\*,12b*R*\*,19b*S*\*)-4bf in  $\text{CDCl}_3$  at 100 MHz.

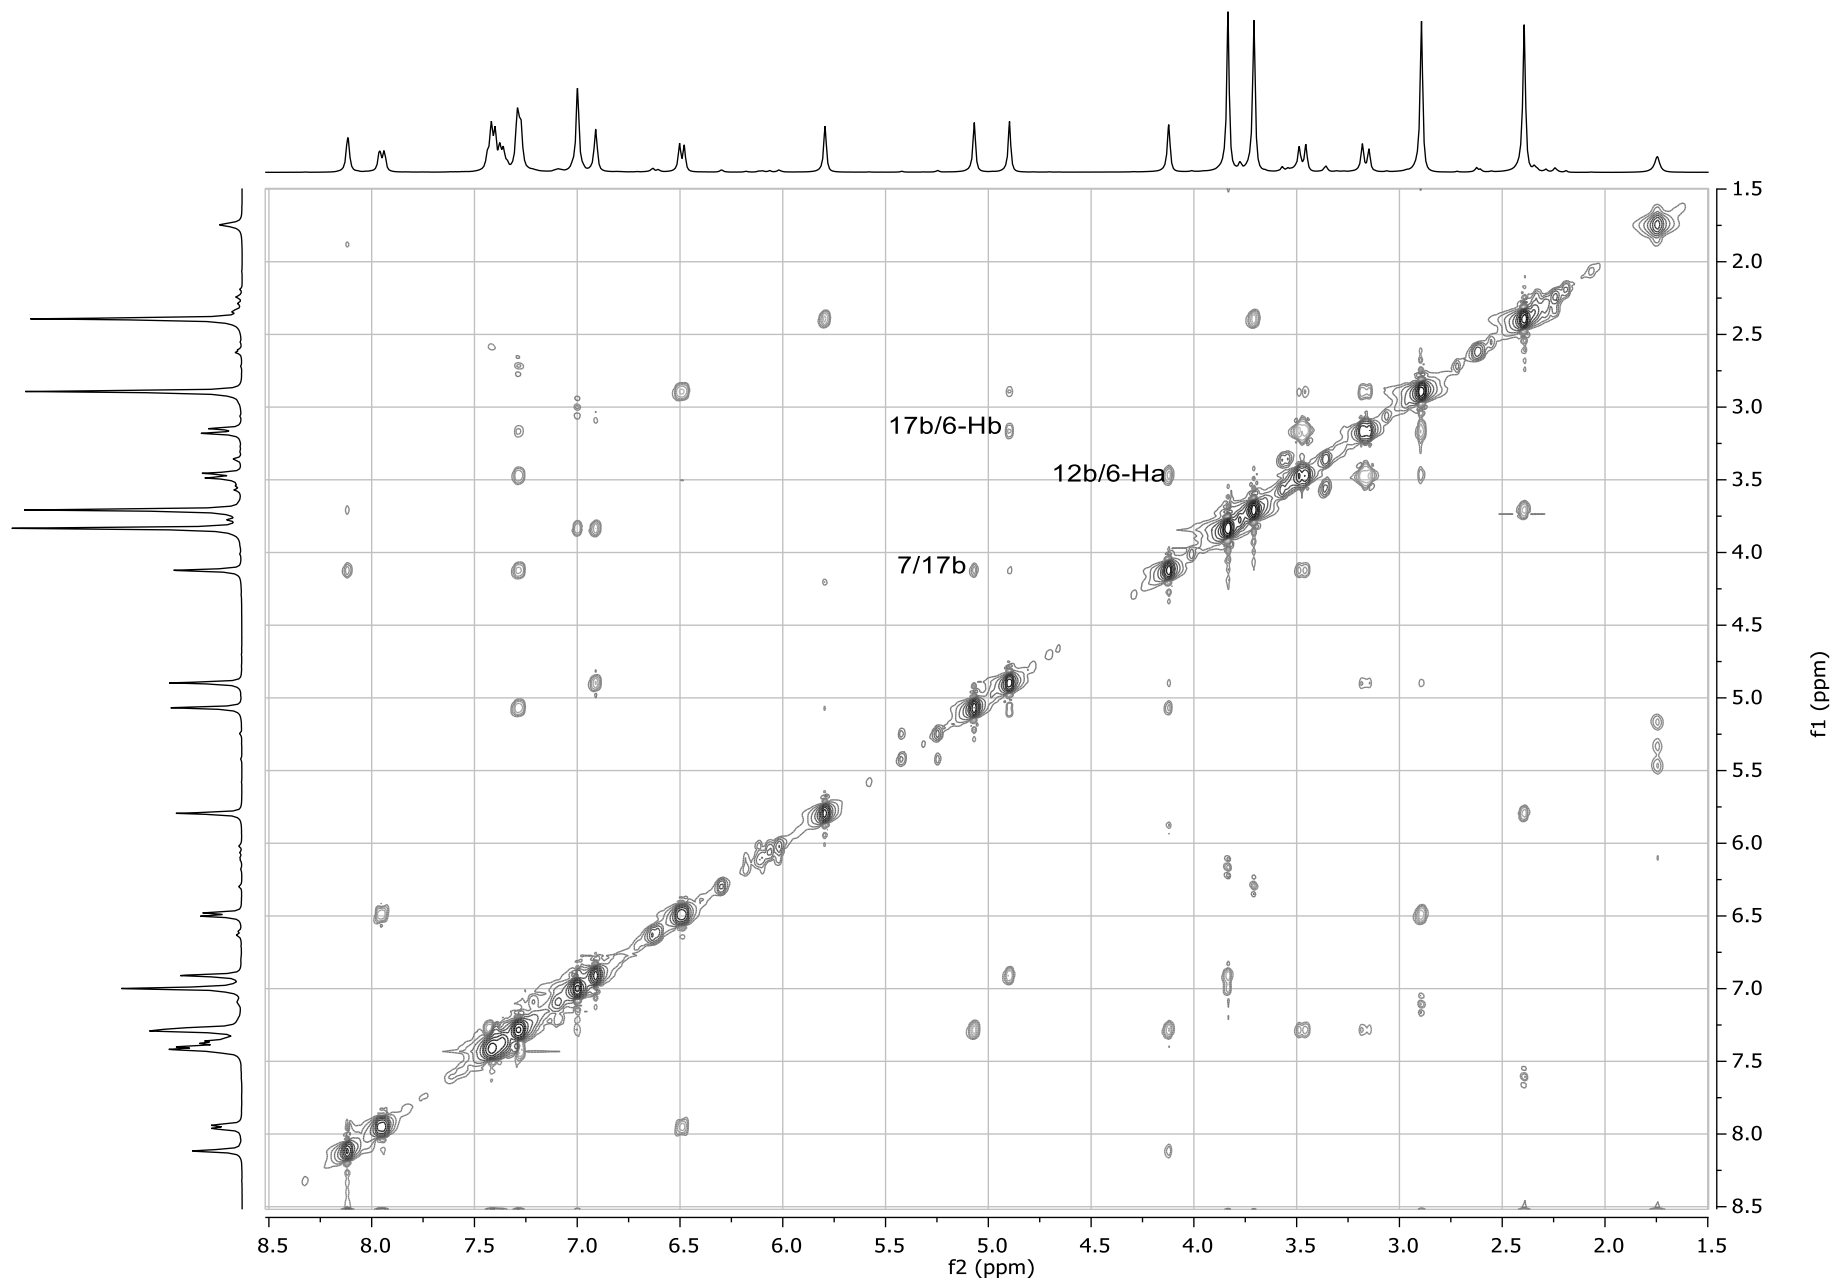

Figure S140. NOESY spectrum of *rac*-(6a*S*<sup>\*</sup>,7*R*<sup>\*</sup>,12b*R*<sup>\*</sup>,19b*S*<sup>\*</sup>)-**4bf** in CDCl<sub>3</sub> at 400 MHz.

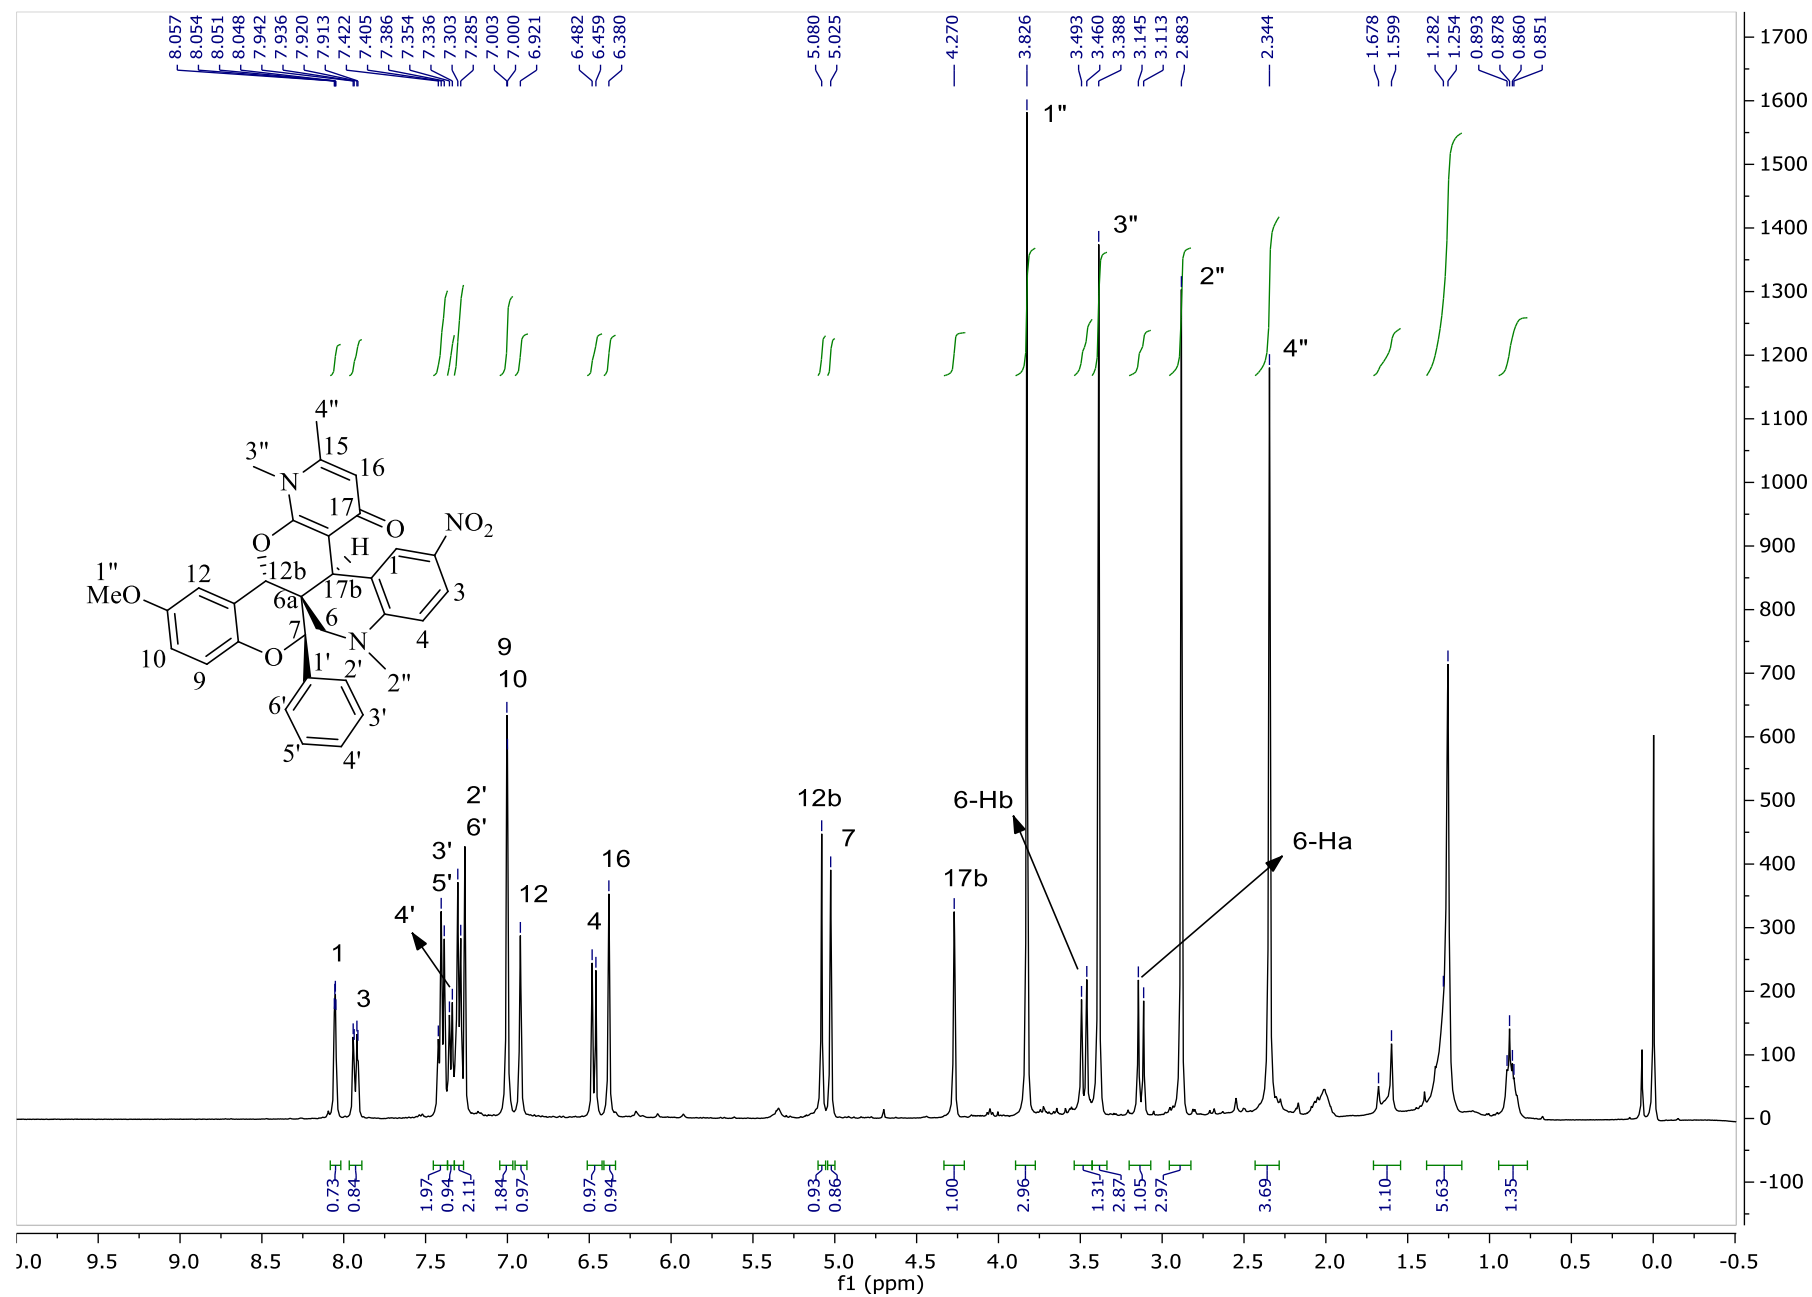

Figure S141. <sup>1</sup>H-NMR spectrum of *rac*-(6a*S*\*,7*R*\*,12b*R*\*,19b*S*\*)-**6bf** in CDCl<sub>3</sub> at 400 MHz.

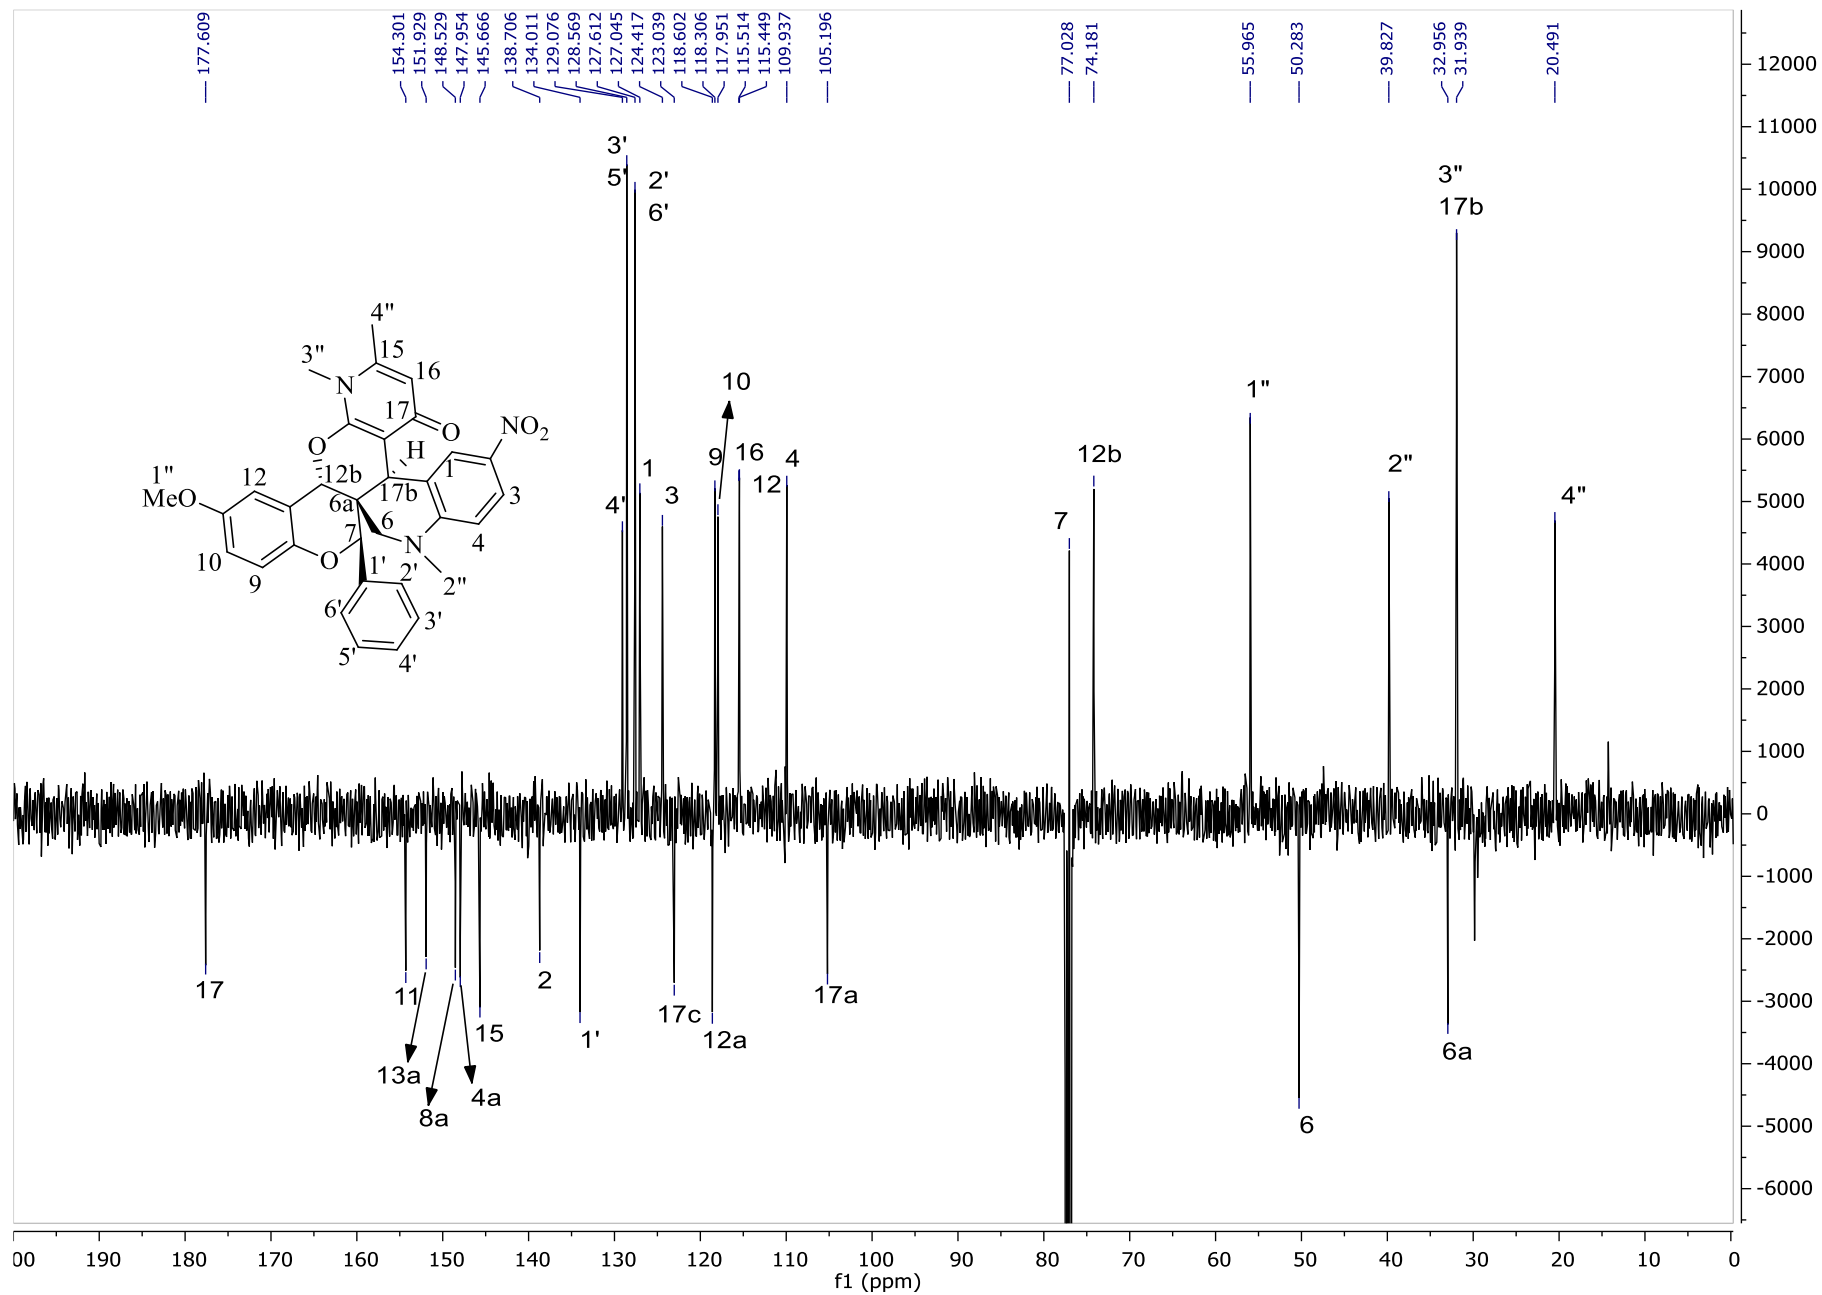

Figure S142.  $^{13}\text{C}$ -NMR spectrum of *rac*-(6a*S*\*,7*R*\*,12b*R*\*,19b*S*\*)-6bf in  $\text{CDCl}_3$  at 100 MHz.

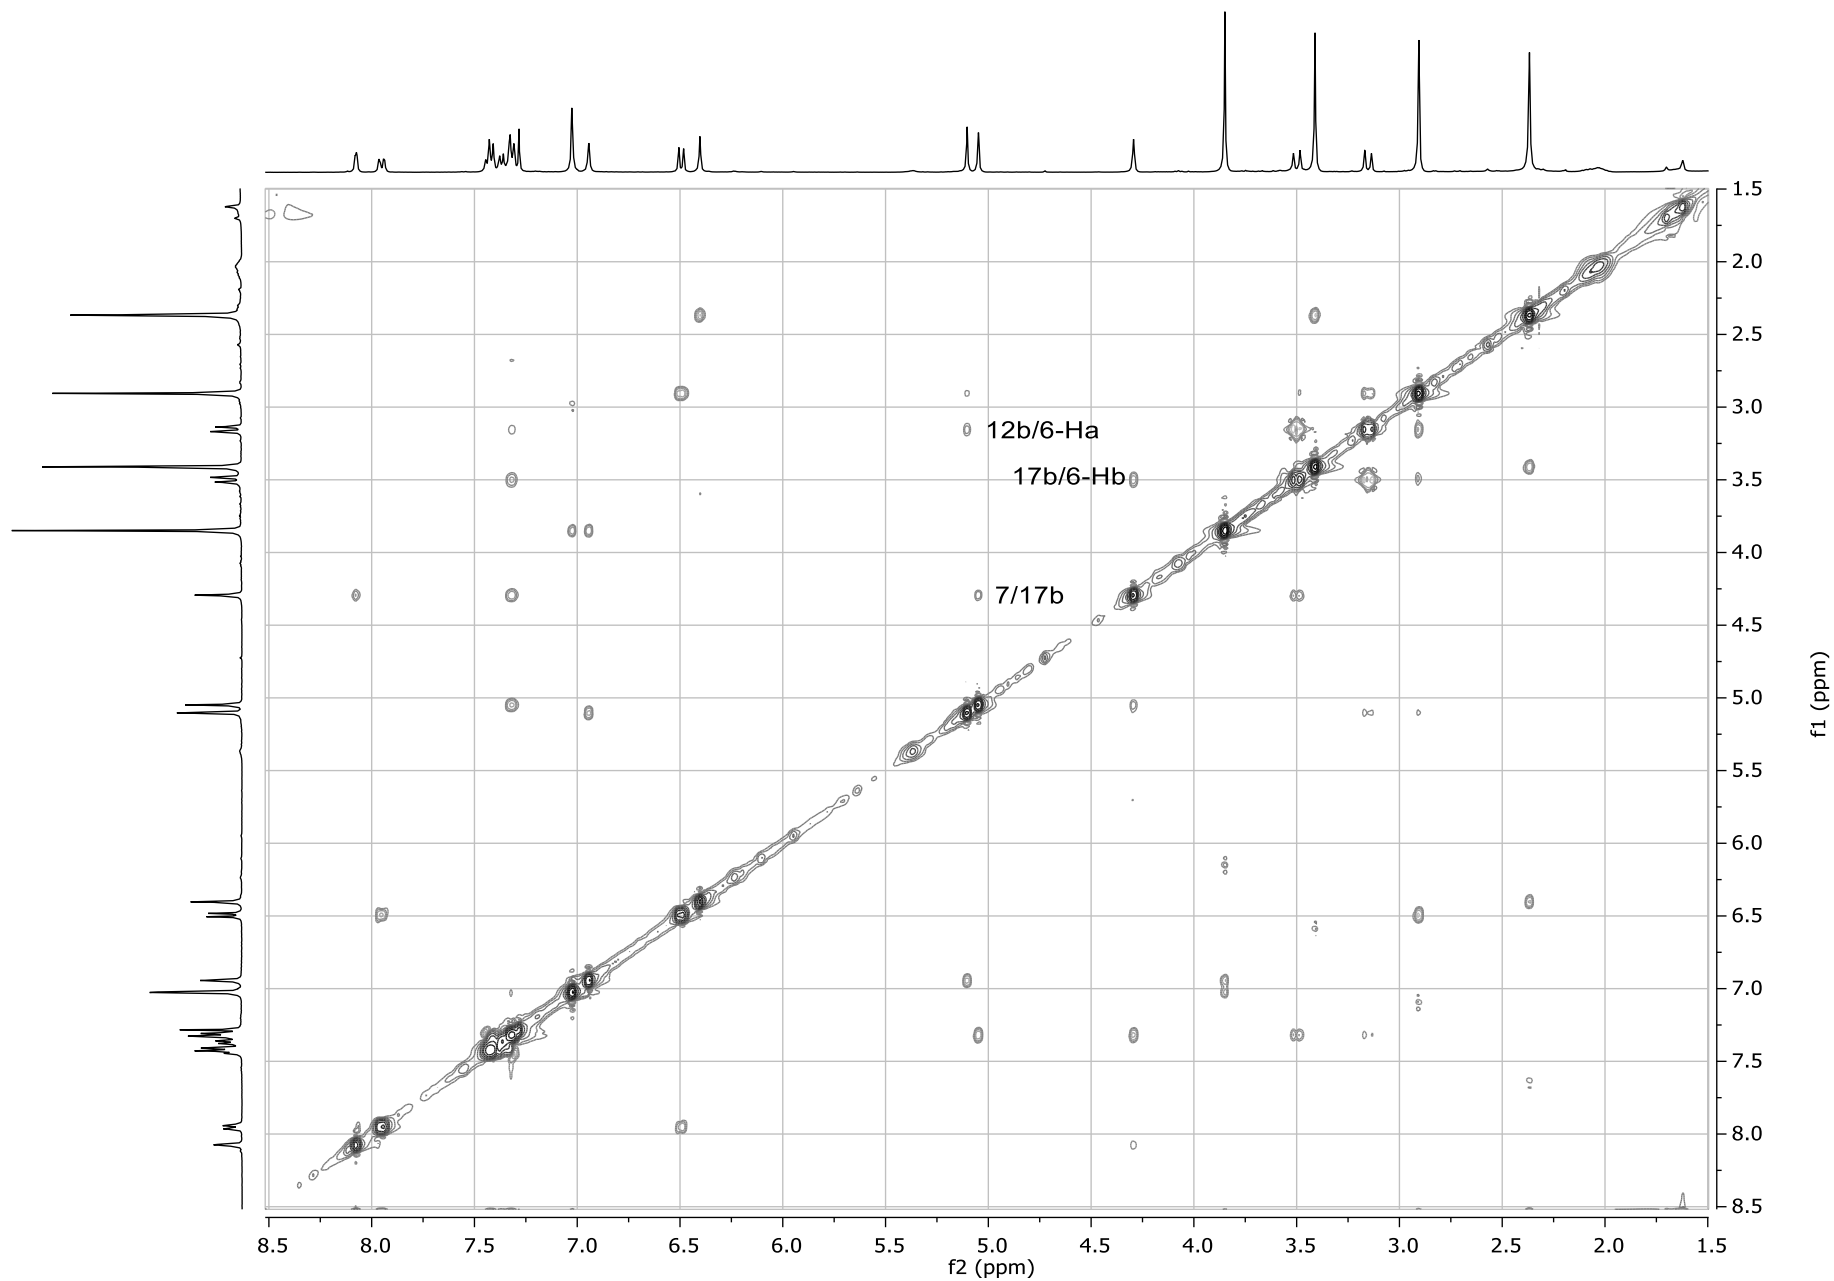

Figure S143. NOESY spectrum of *rac*-(6a*S*<sup>\*</sup>,7*R*<sup>\*</sup>,12b*R*<sup>\*</sup>,19b*S*<sup>\*</sup>)-**6bf** in CDCl<sub>3</sub> at 400 MHz.

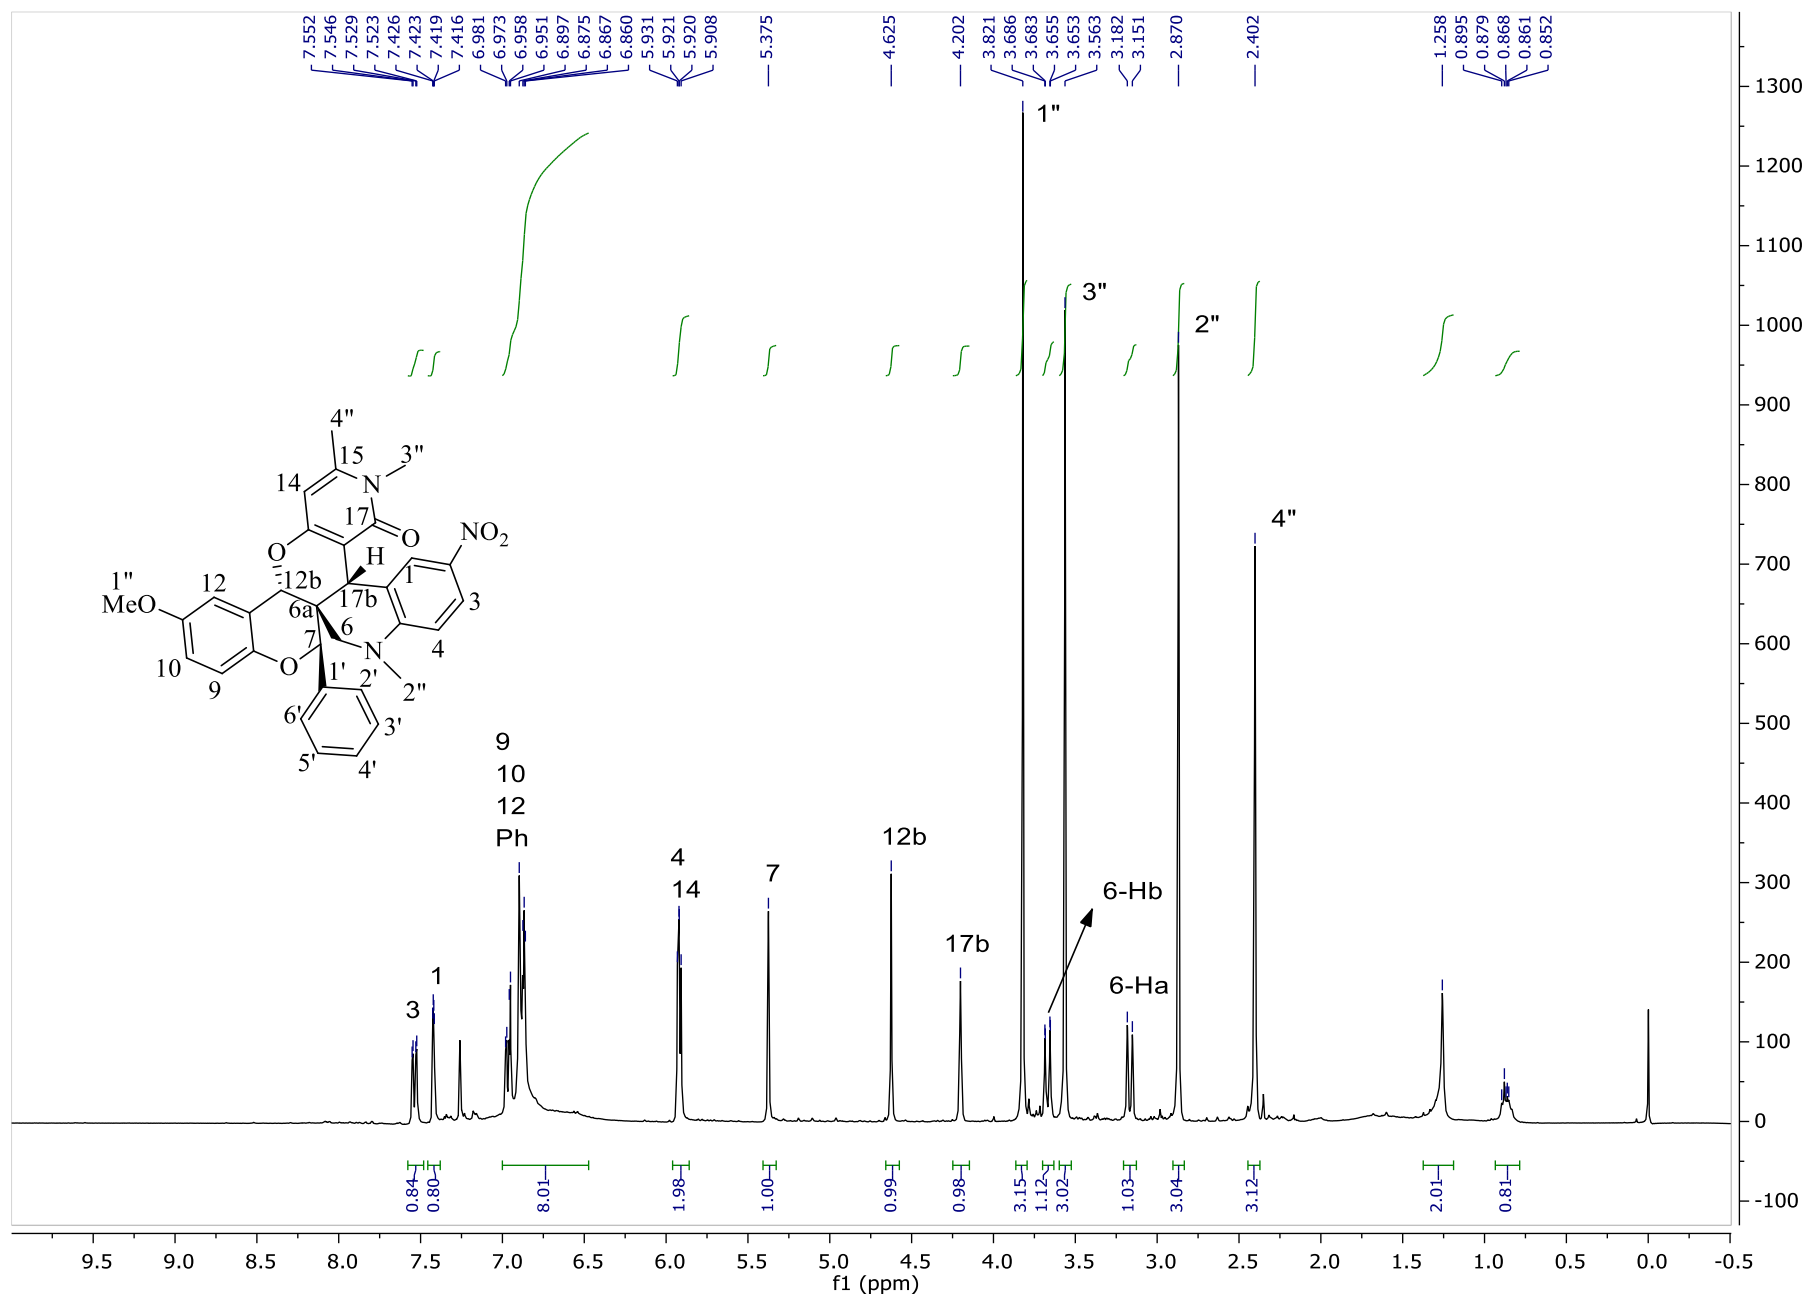

Figure S144.  $^1\text{H-NMR}$  spectrum of *rac*-(6a*S*\*,7*R*\*,12b*R*\*,19b*R*\*)-**5bf** in  $\text{CDCl}_3$  at 400 MHz.

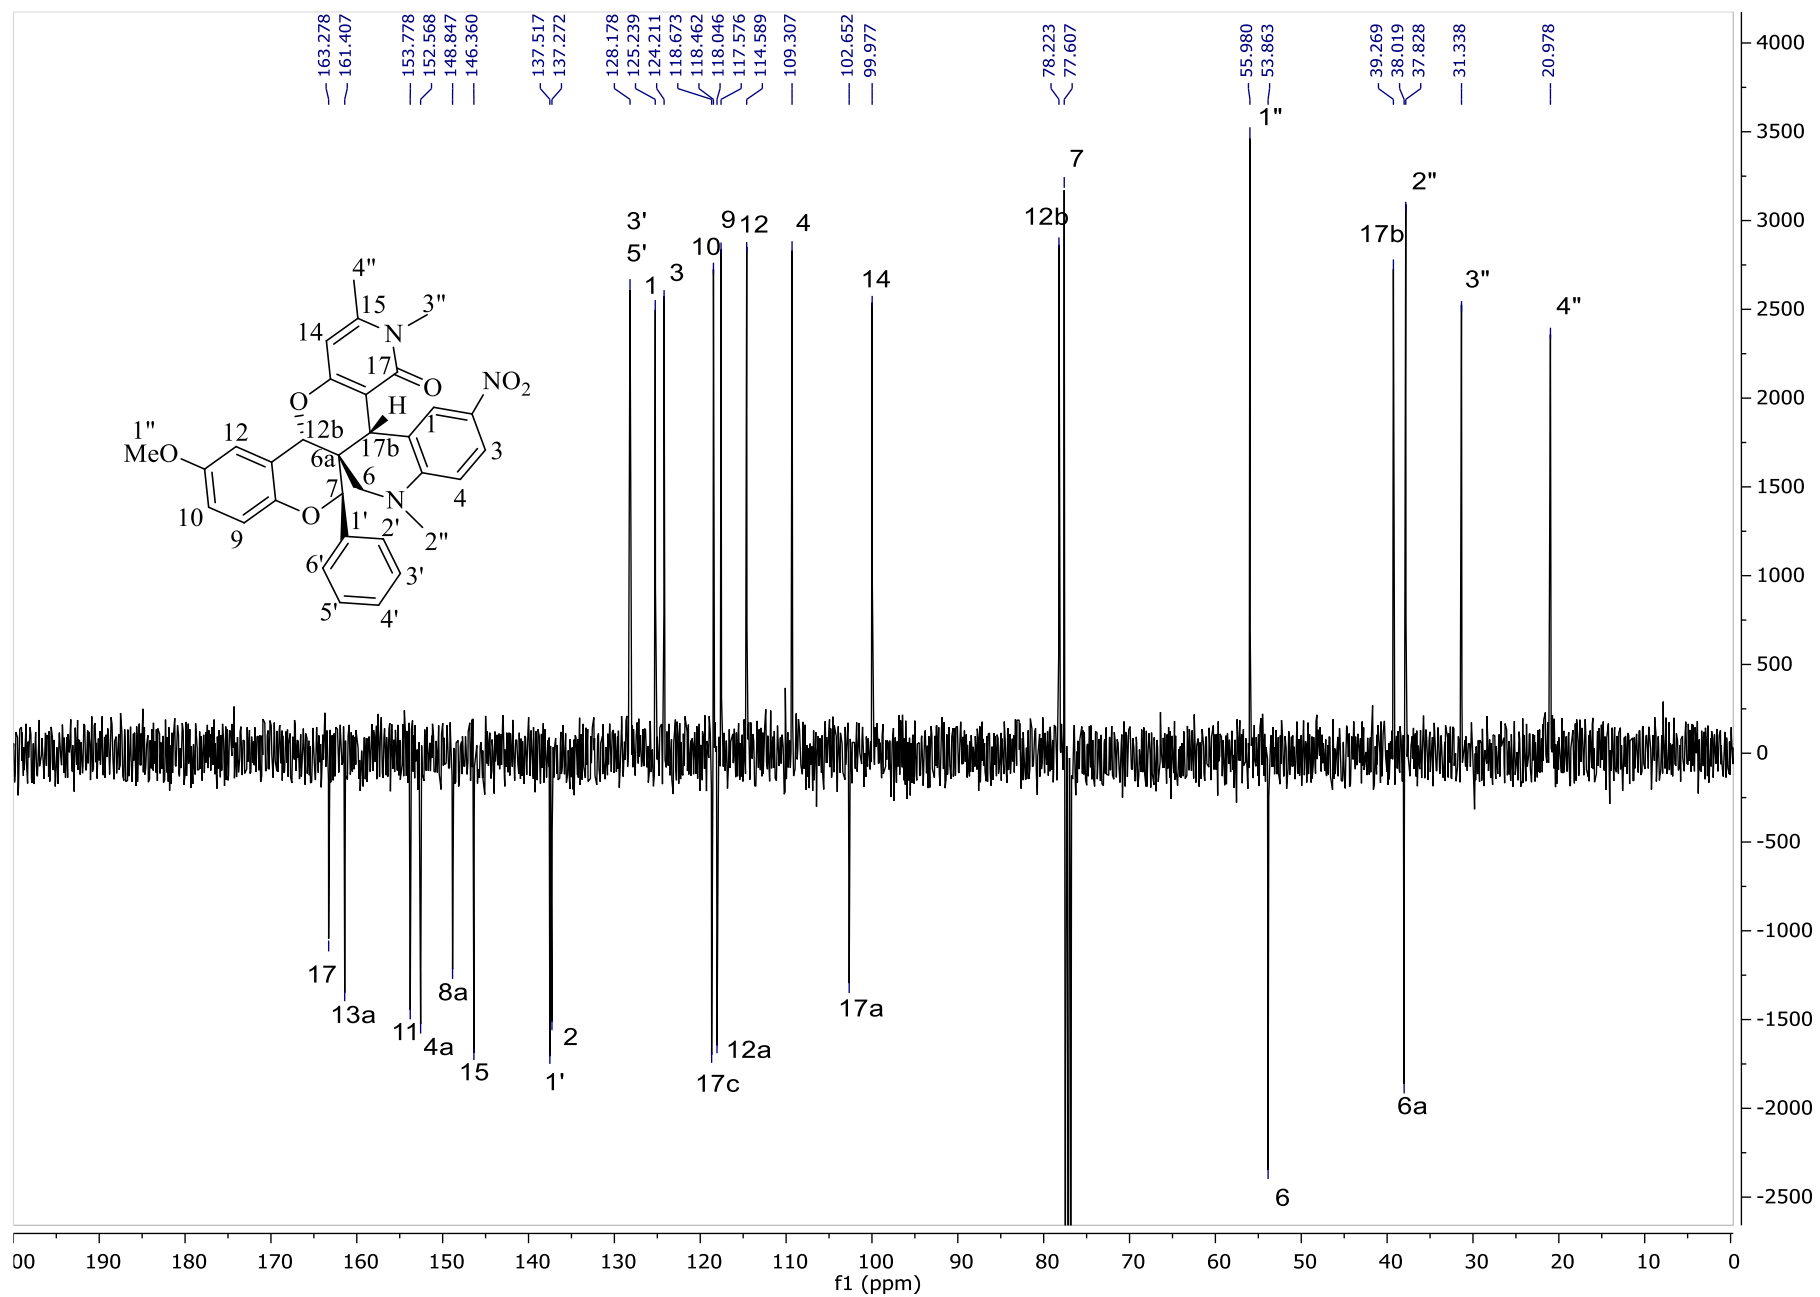

Figure S145. <sup>13</sup>C-NMR spectrum of *rac*-(6a*S*\*,7*R*\*,12b*R*\*,19b*R*\*)-**5bf** in CDCl<sub>3</sub> at 100 MHz.

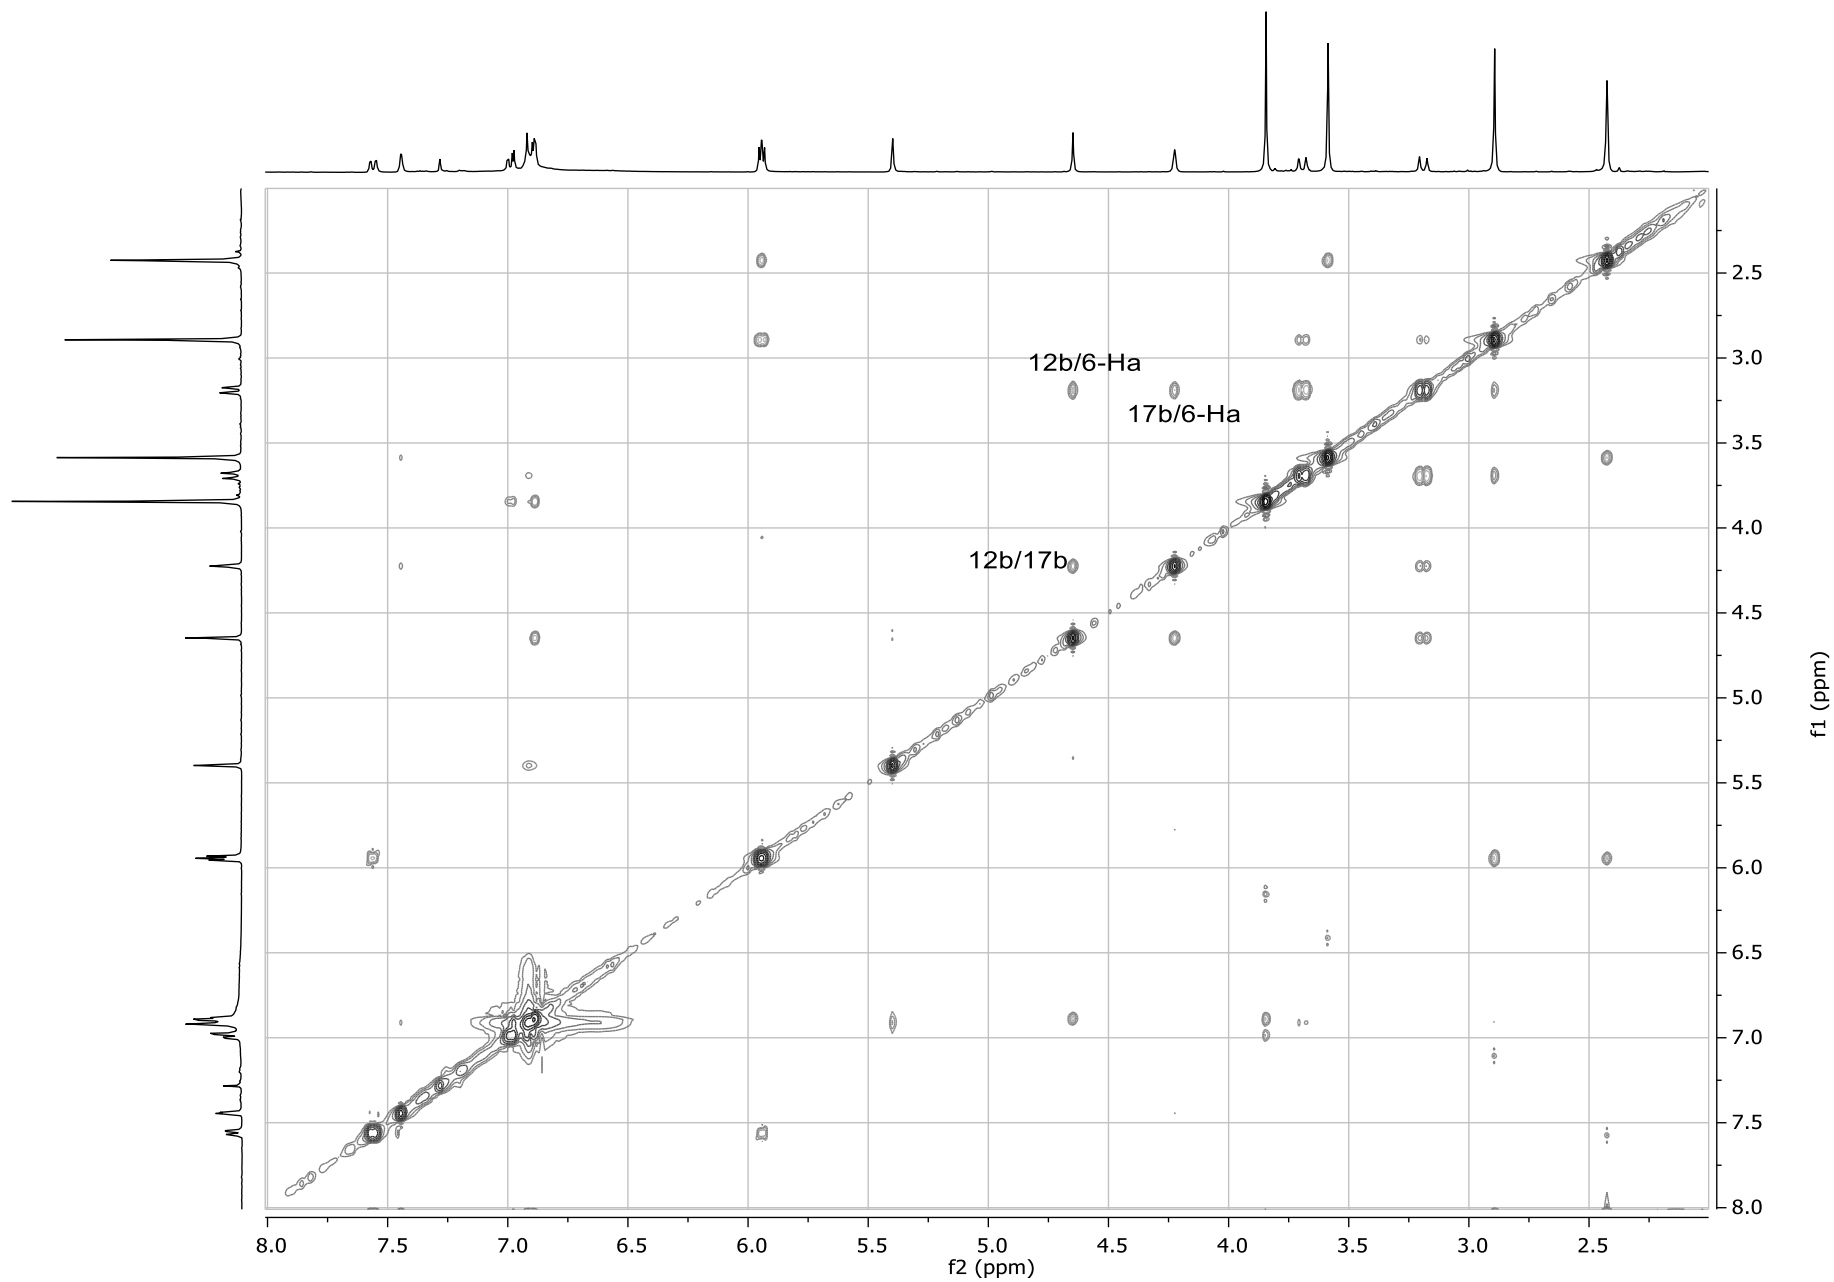

Figure S146. NOESY spectrum of *rac*-(6a*S*\*,7*R*\*,12b*R*\*,19b*R*\*)-**5bf** in CDCl<sub>3</sub> at 400 MHz.

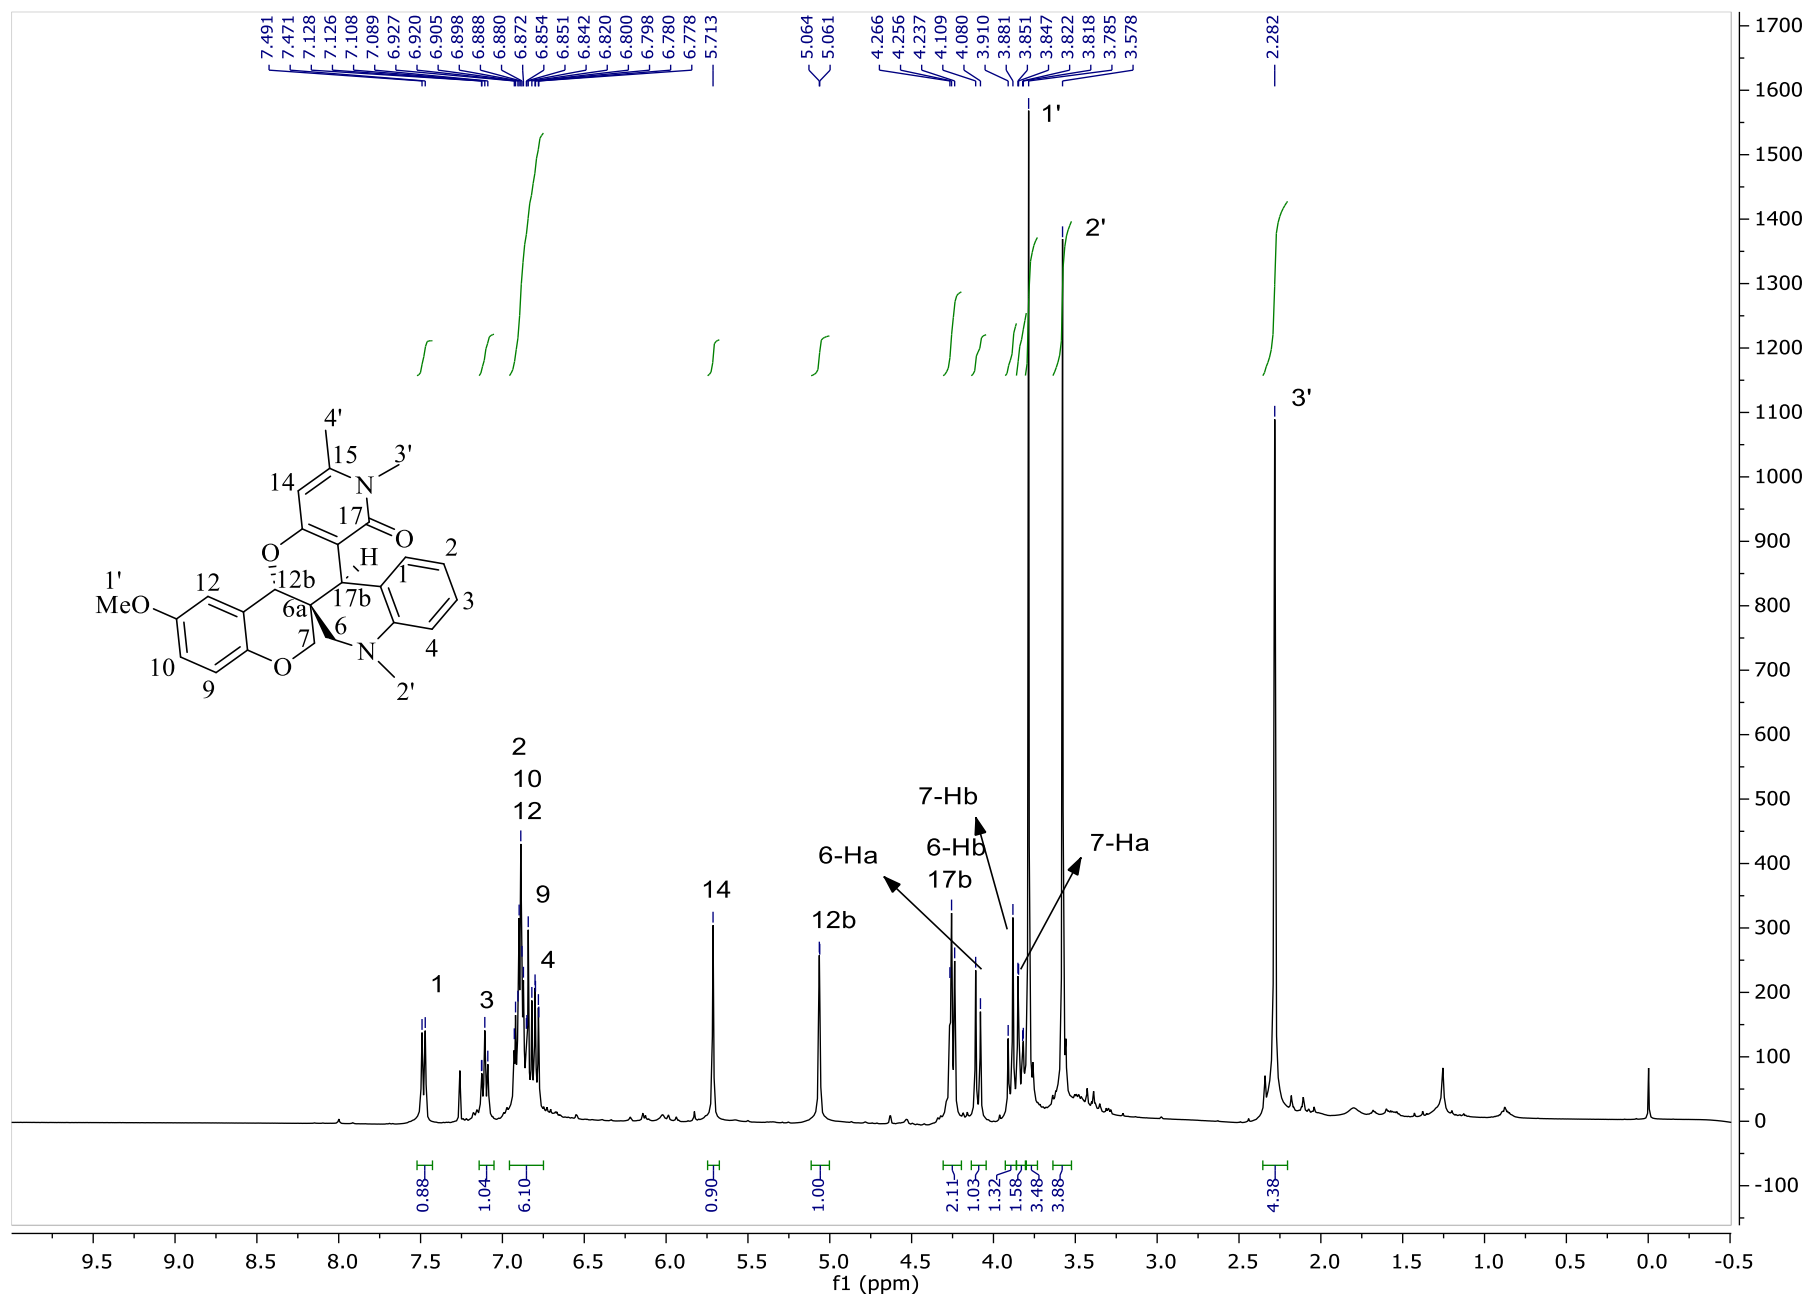

Figure S147. <sup>1</sup>H-NMR spectrum of *rac*-(6a*S*\*,12b*R*\*,17b*R*\*)-4cf in CDCl<sub>3</sub> at 400 MHz.

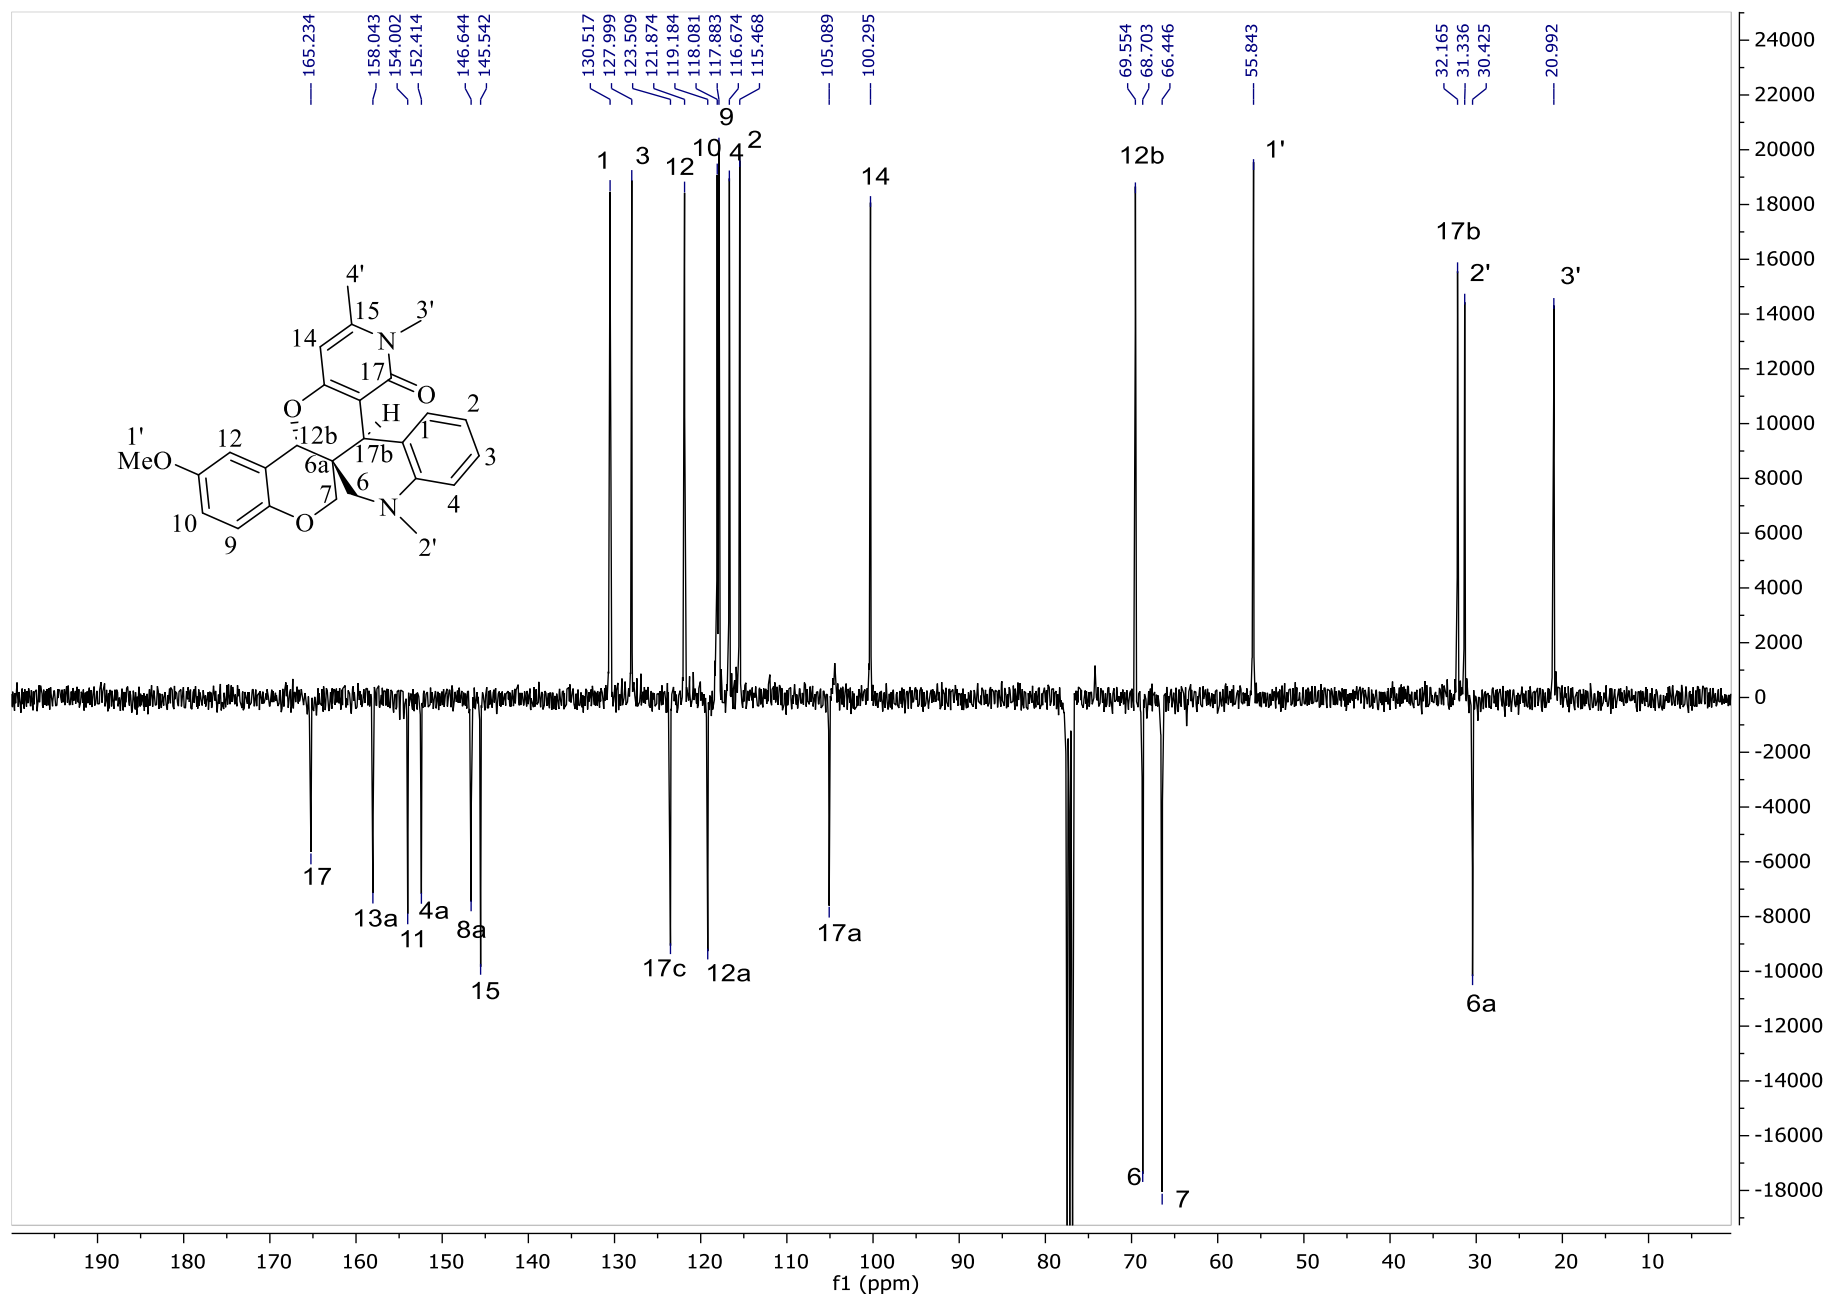

Figure S148. <sup>13</sup>C-NMR spectrum of *rac*-(6a*S*\*,12b*R*\*,17b*R*\*)-4cf in CDCl<sub>3</sub> at 100 MHz.



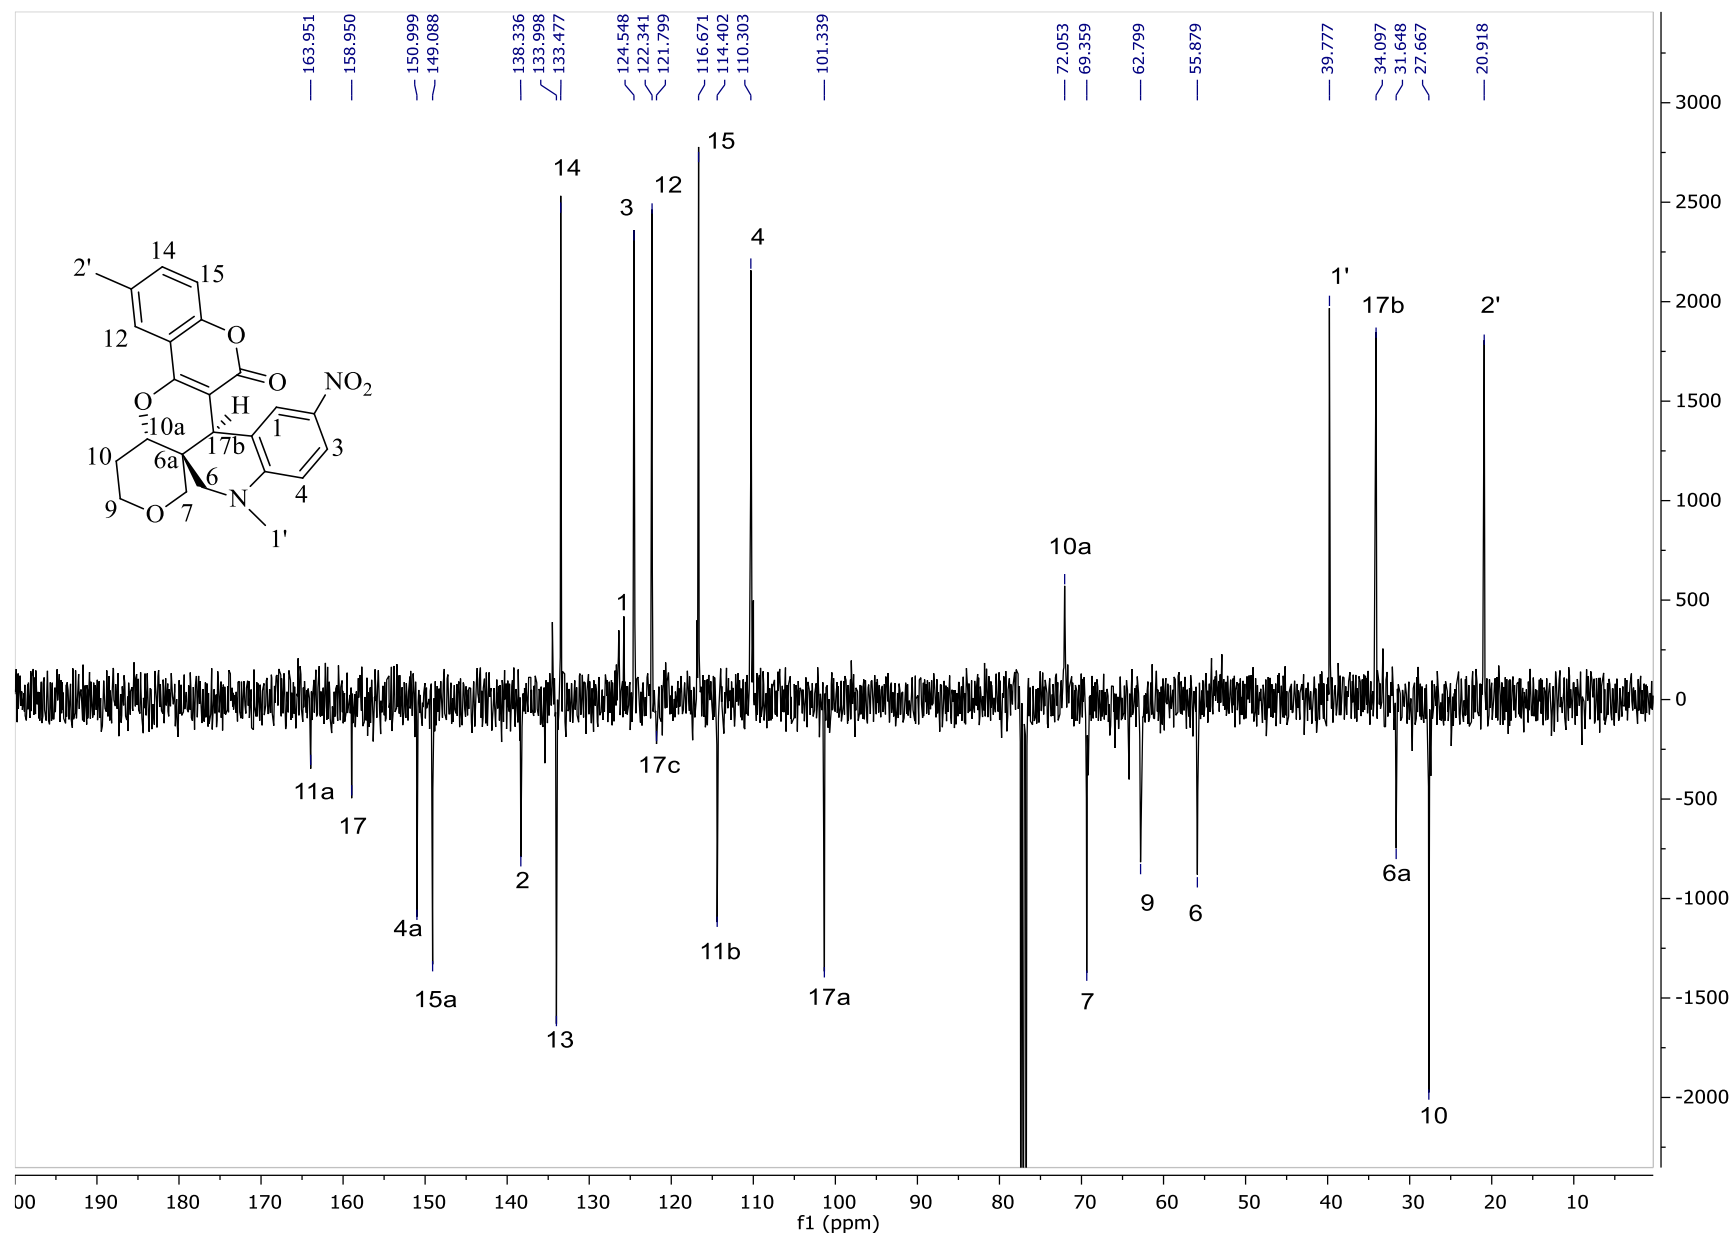

Figure S150. <sup>13</sup>C-NMR spectrum of *rac*-(6a*S*\*,10a*S*\*,15b*S*\*)-**10aa** in CDCl<sub>3</sub> at 100 MHz.

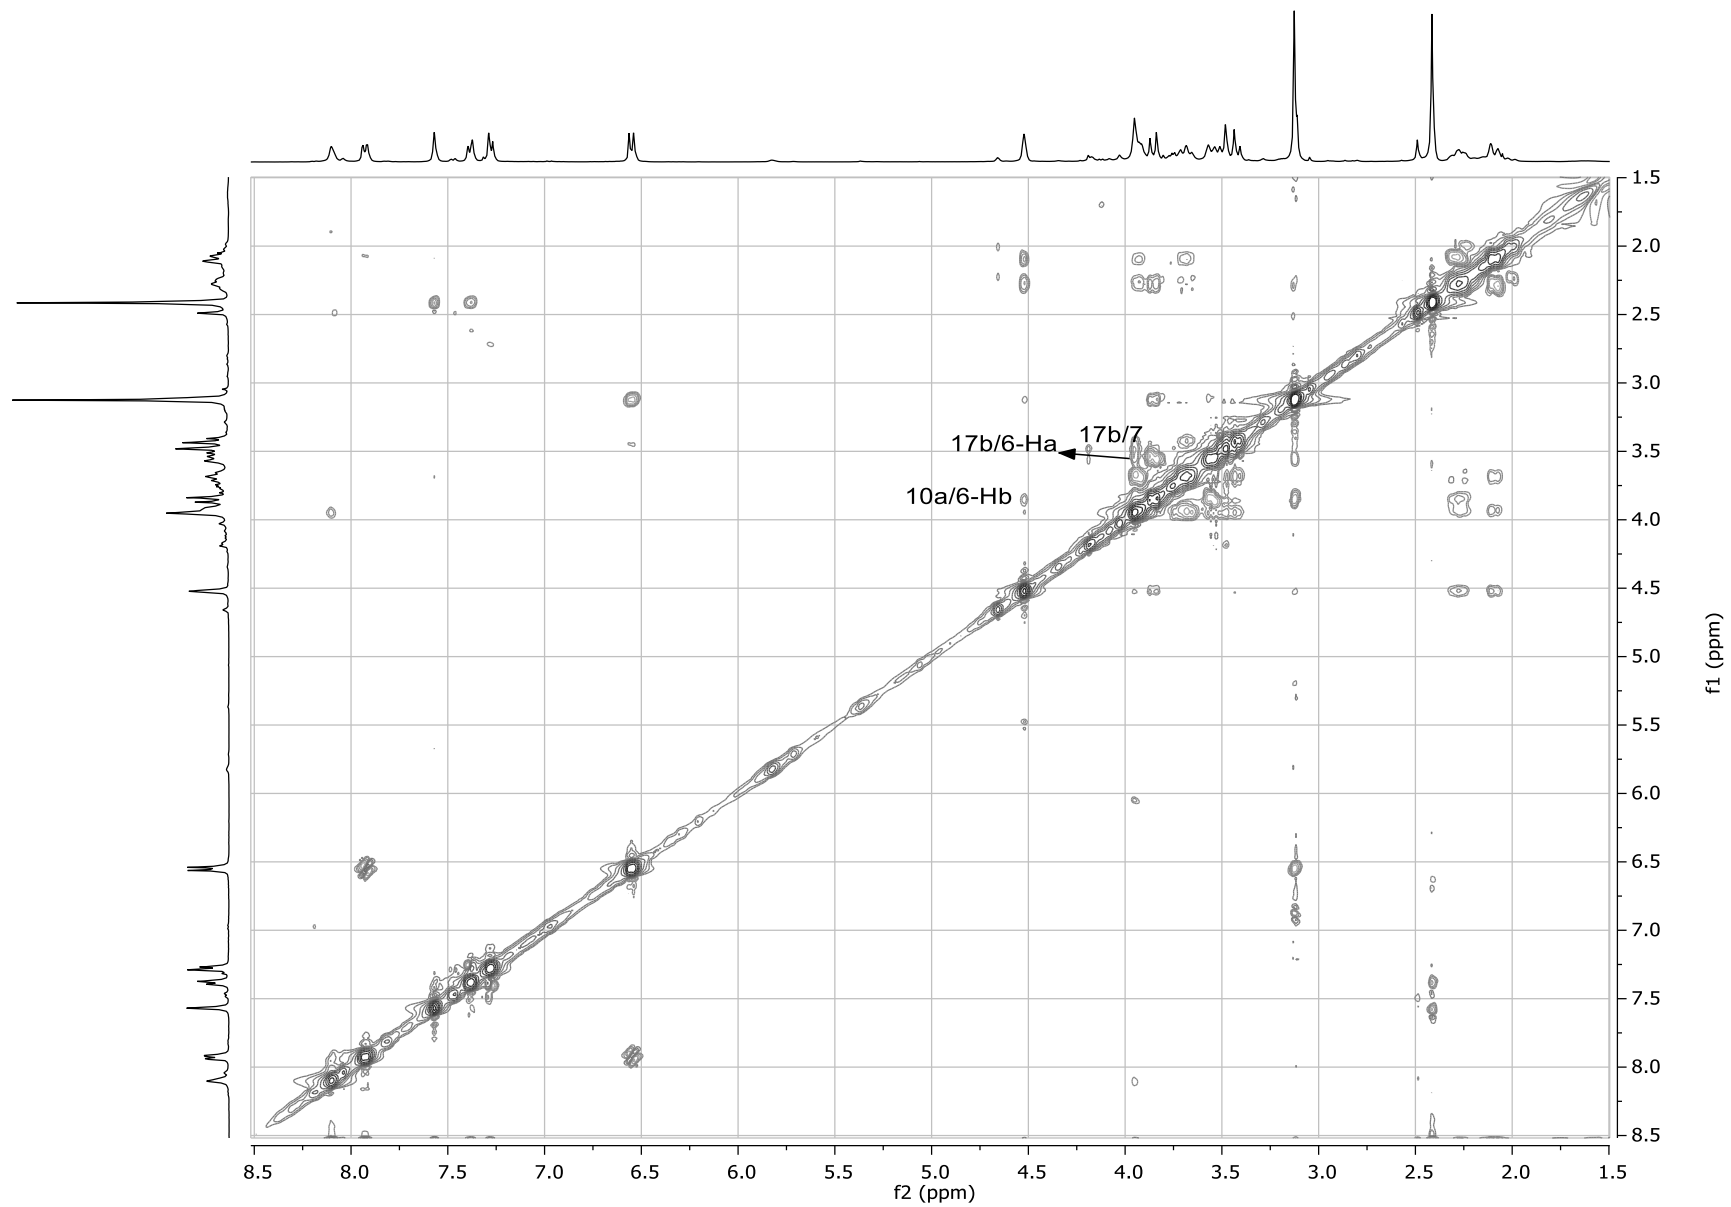

Figure S151. NOESY spectrum of *rac*-(6a*S*\*,10a*S*\*,15b*S*\*)-**10aa** in CDCl<sub>3</sub> at 400 MHz.

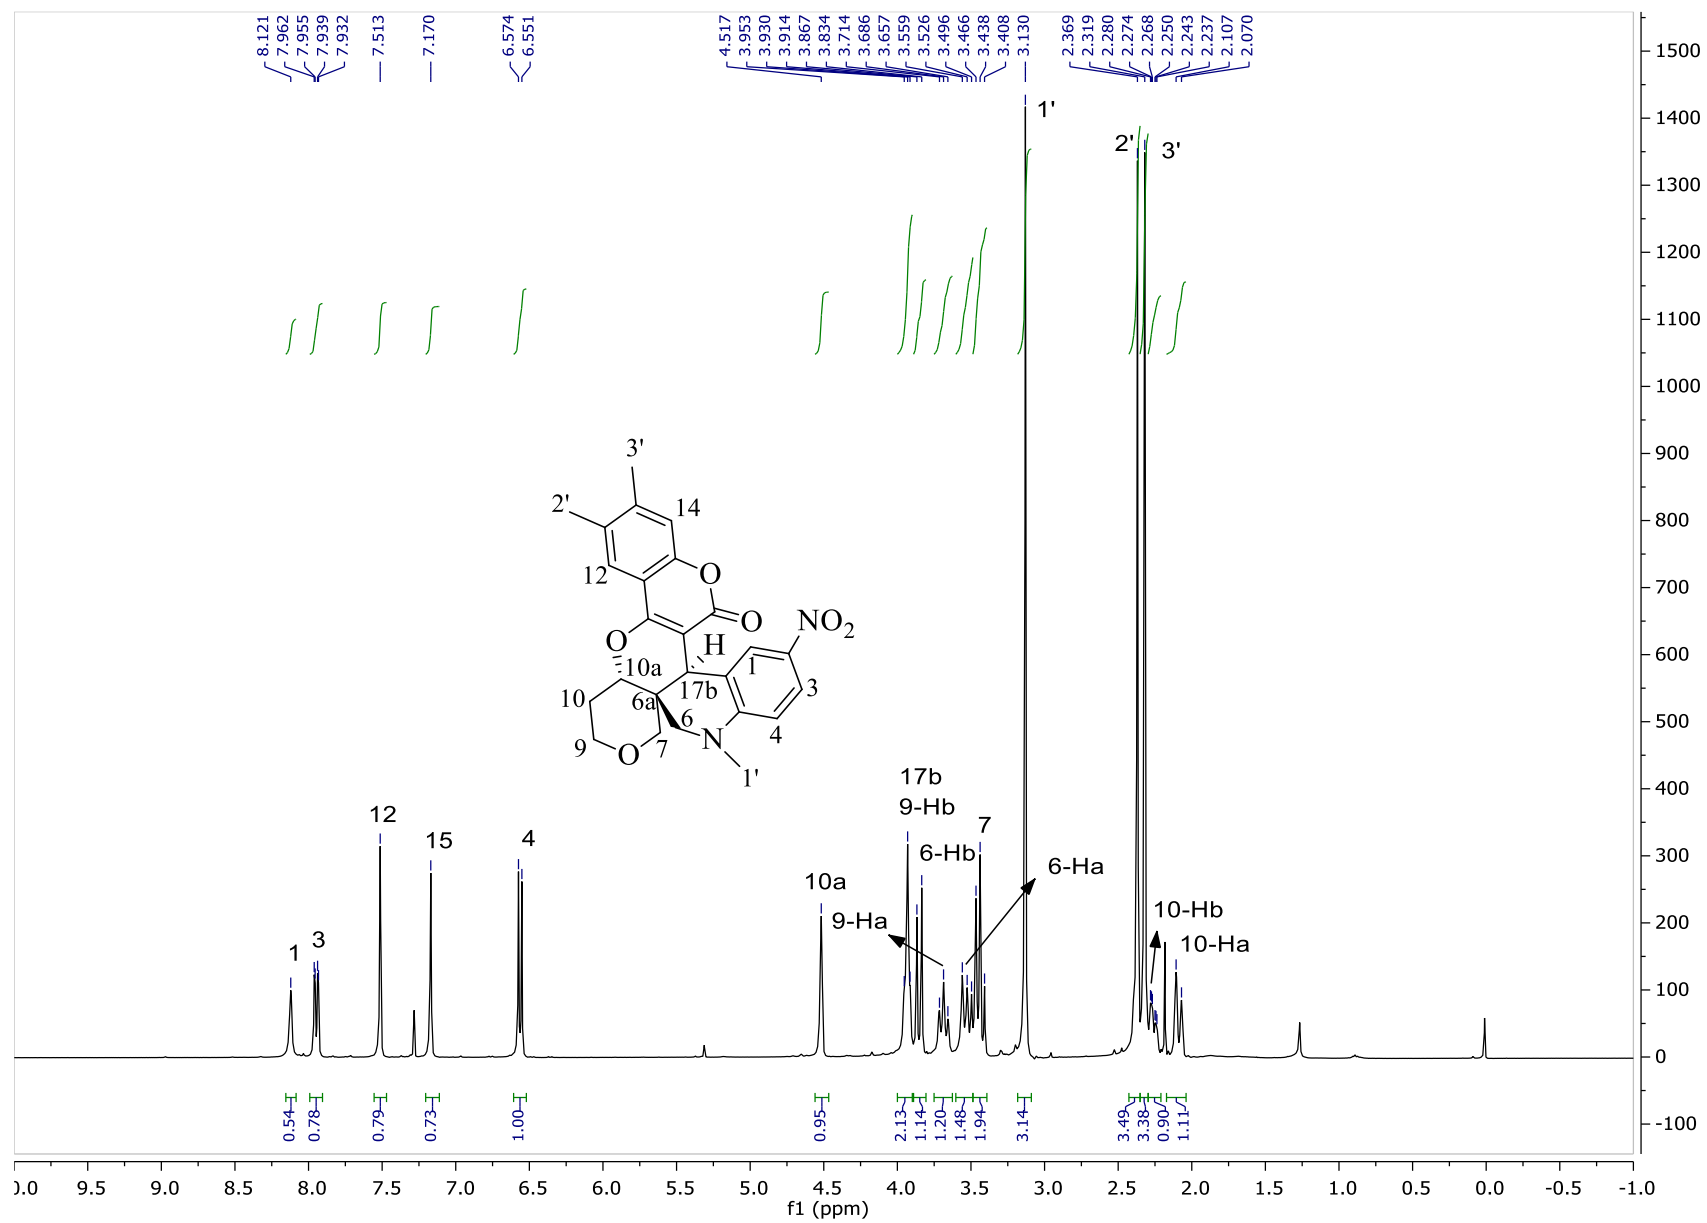

Figure S152. <sup>1</sup>H-NMR spectrum of *rac*-(6a*S*\*,10a*S*\*,15b*S*\*)-10ab in CDCl<sub>3</sub> at 400 MHz.

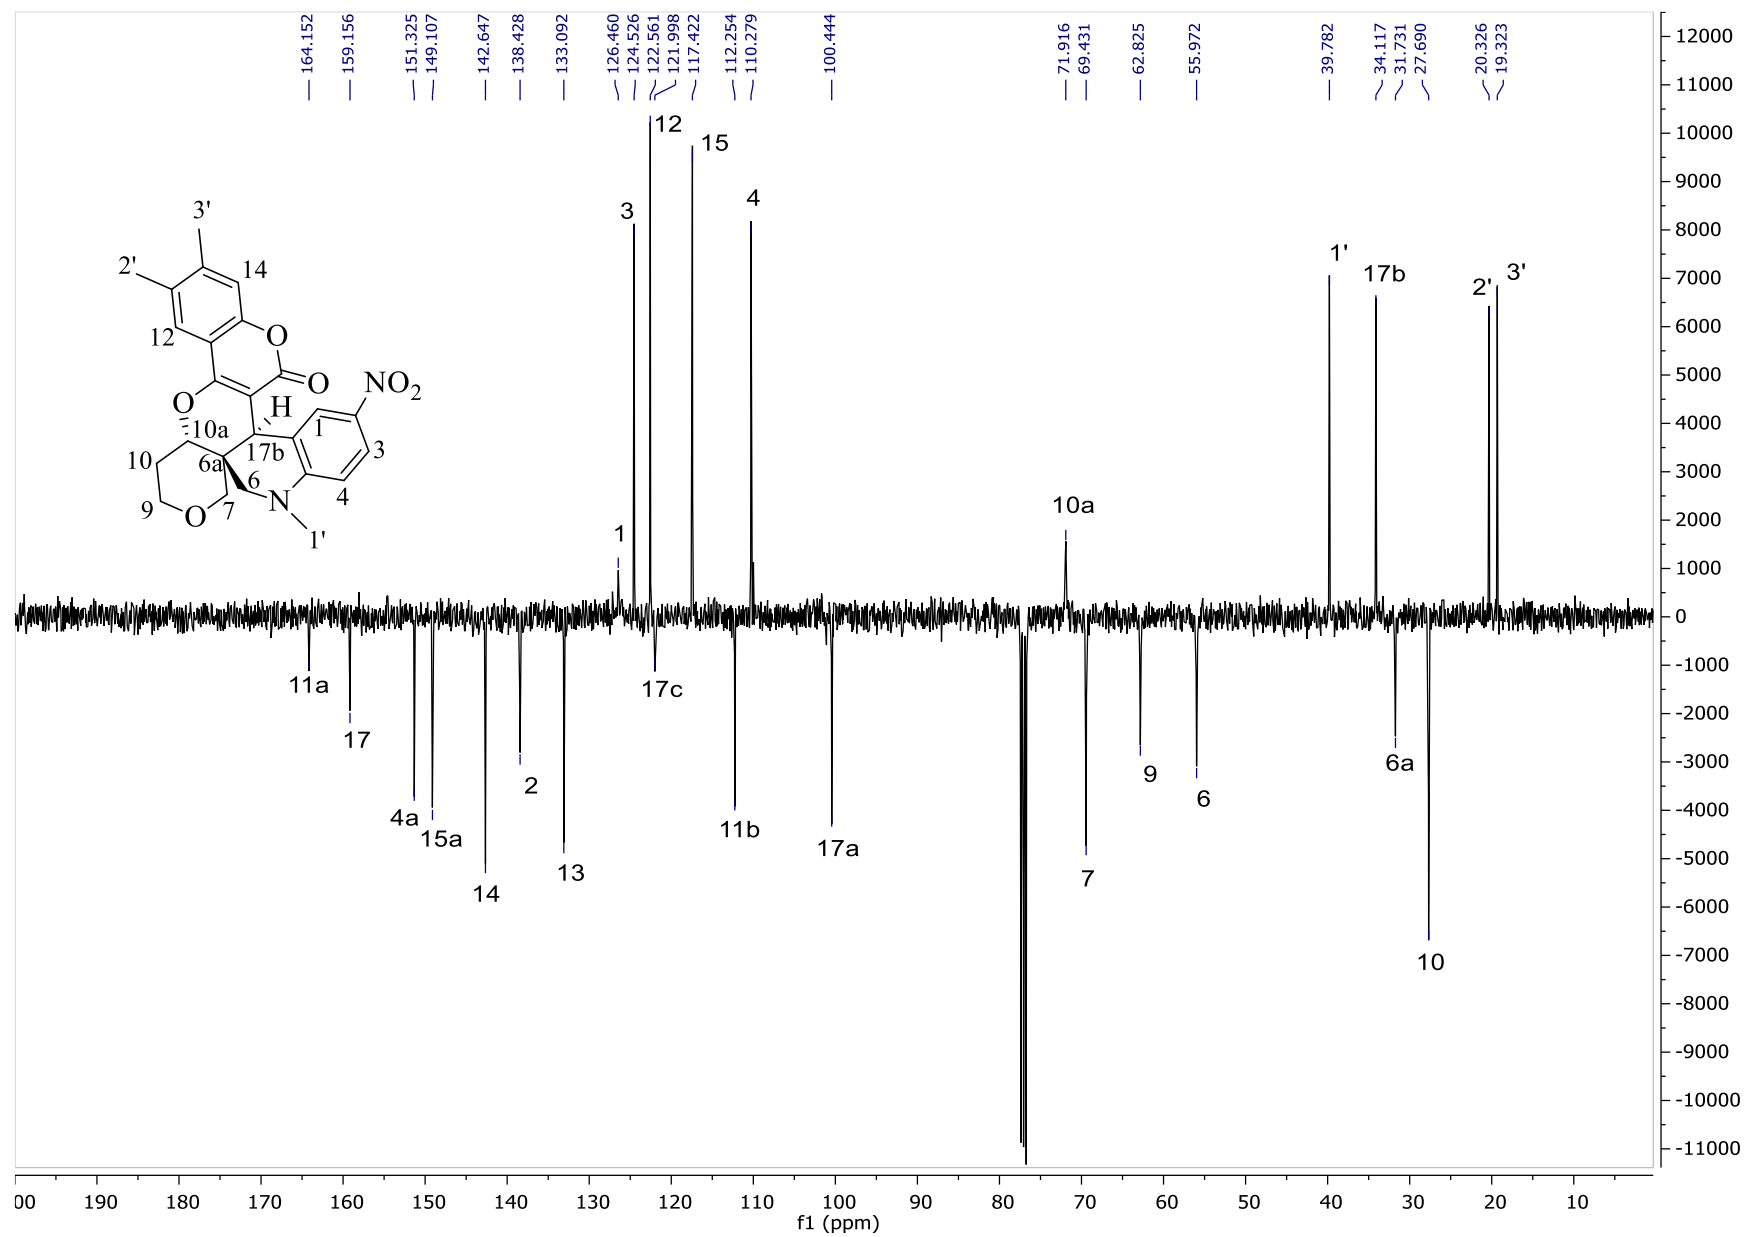

Figure S153. <sup>13</sup>C-NMR spectrum of *rac*-(6a*S*\*,10a*S*\*,15b*S*\*)-**10ab** in CDCl<sub>3</sub> at 100 MHz.

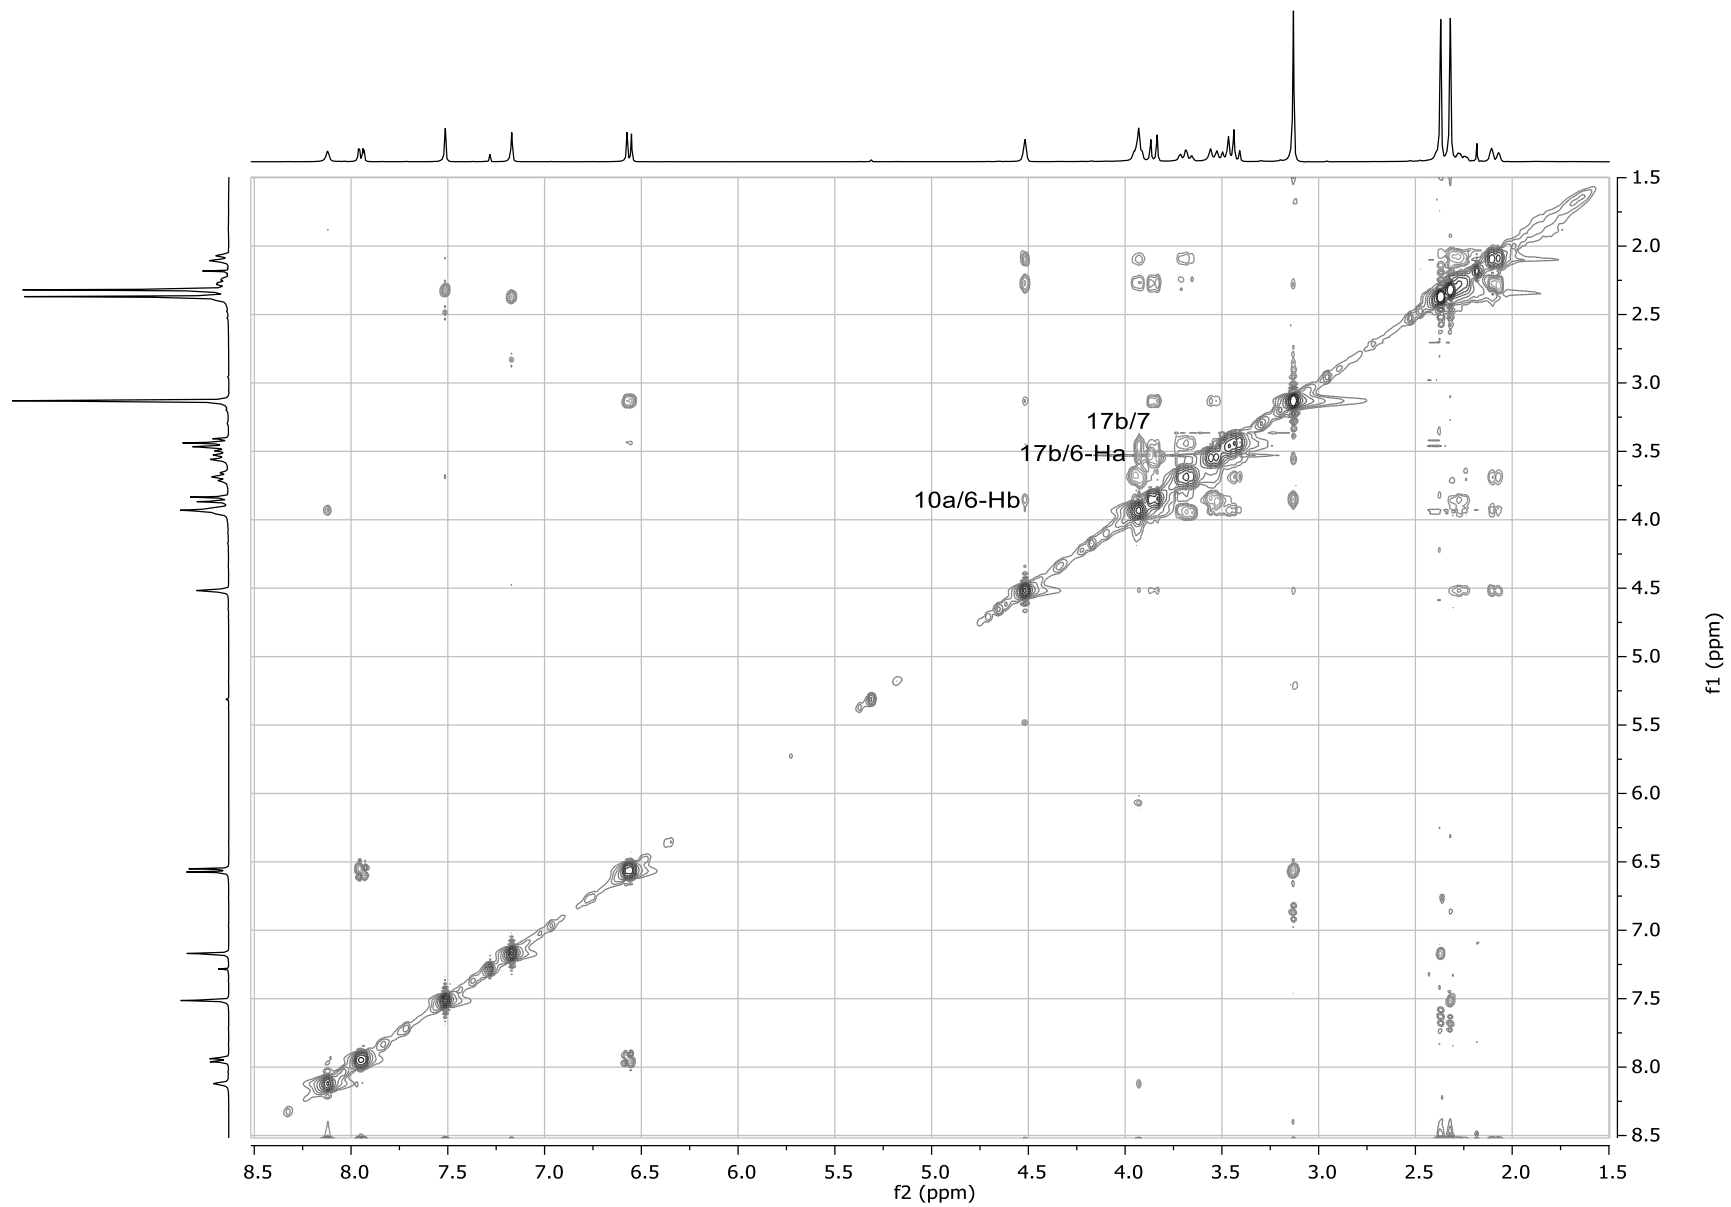

Figure S154. NOESY spectrum of *rac*-(6a*S*\*,10a*S*\*,15b*S*\*)-**10ab** in CDCl<sub>3</sub> at 400 MHz.



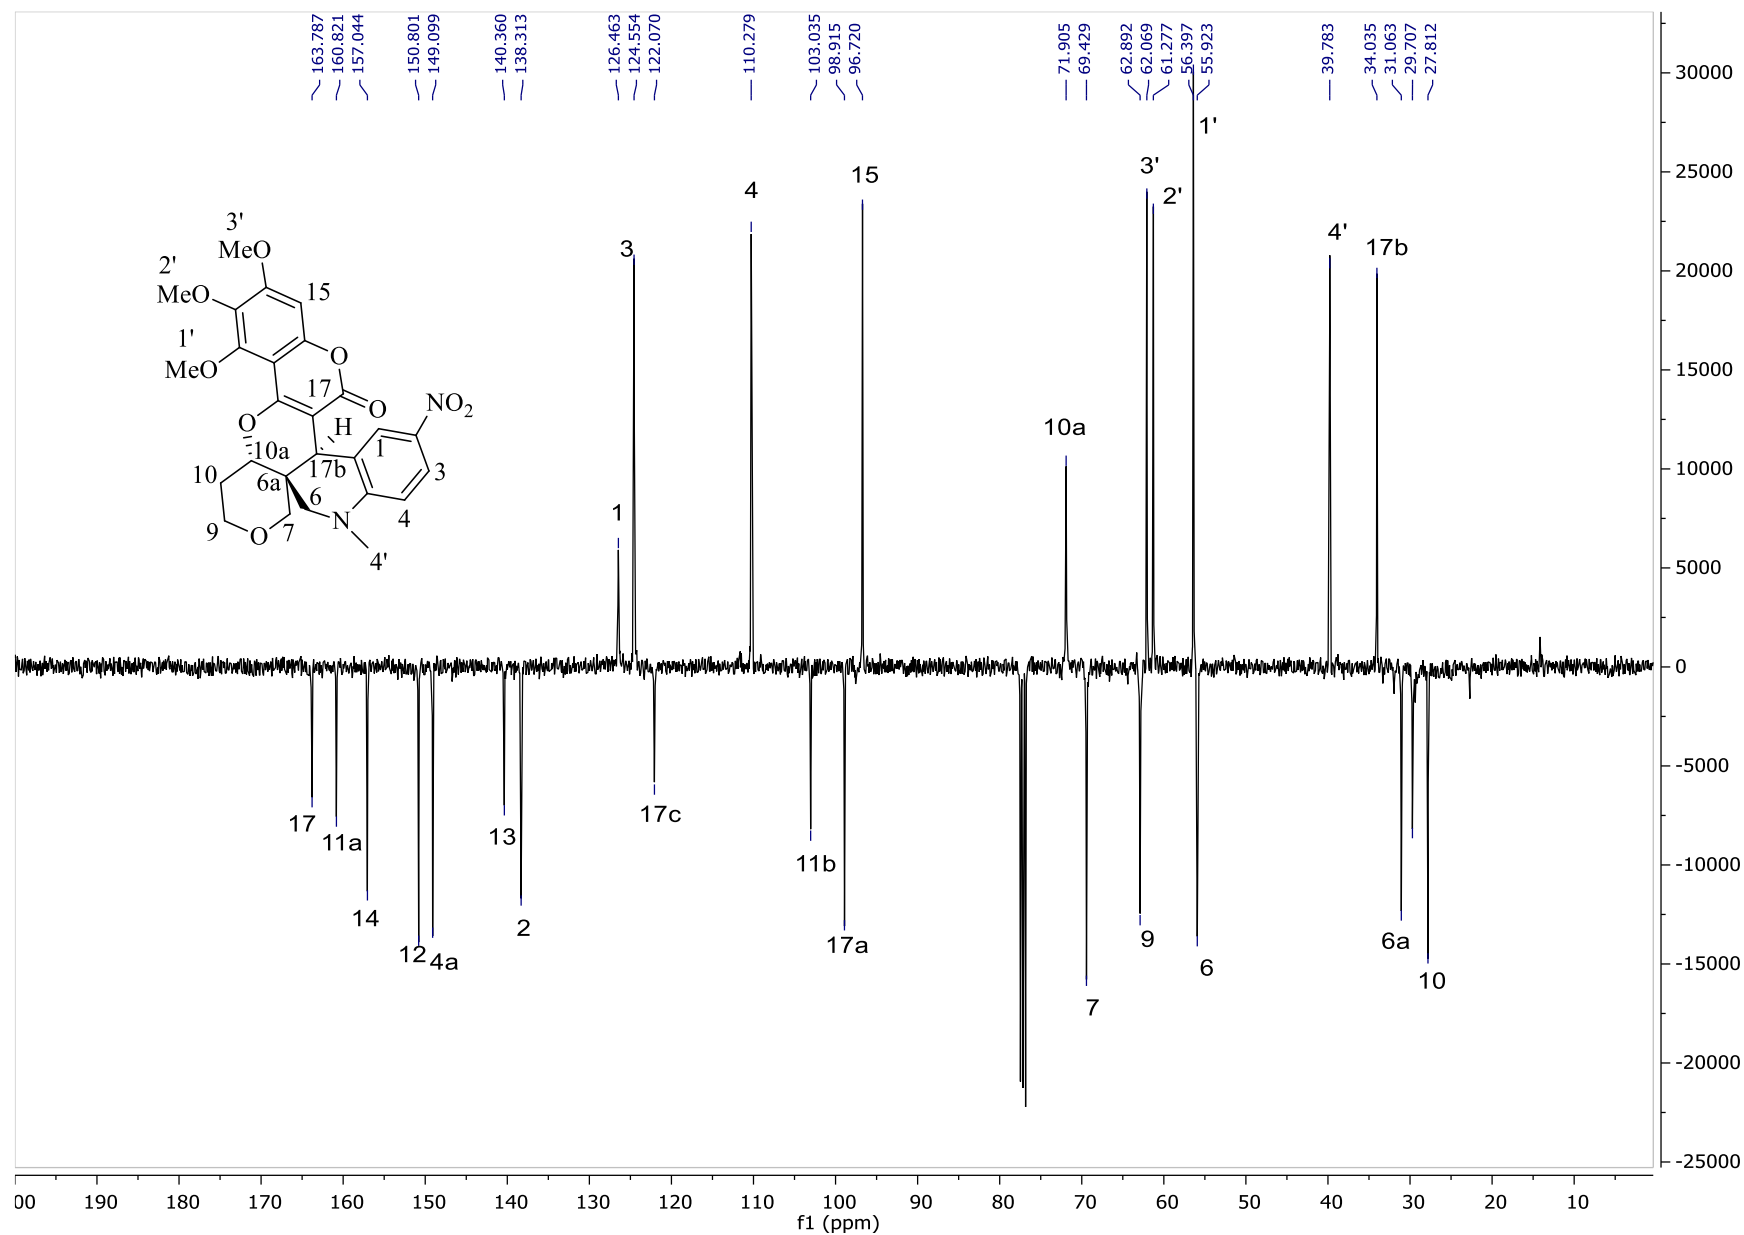

Figure S156.  $^{13}\text{C}$ -NMR spectrum of *rac*-(6a*S*\*,10a*S*\*,15b*S*\*)-10ac in  $\text{CDCl}_3$  at 100 MHz.

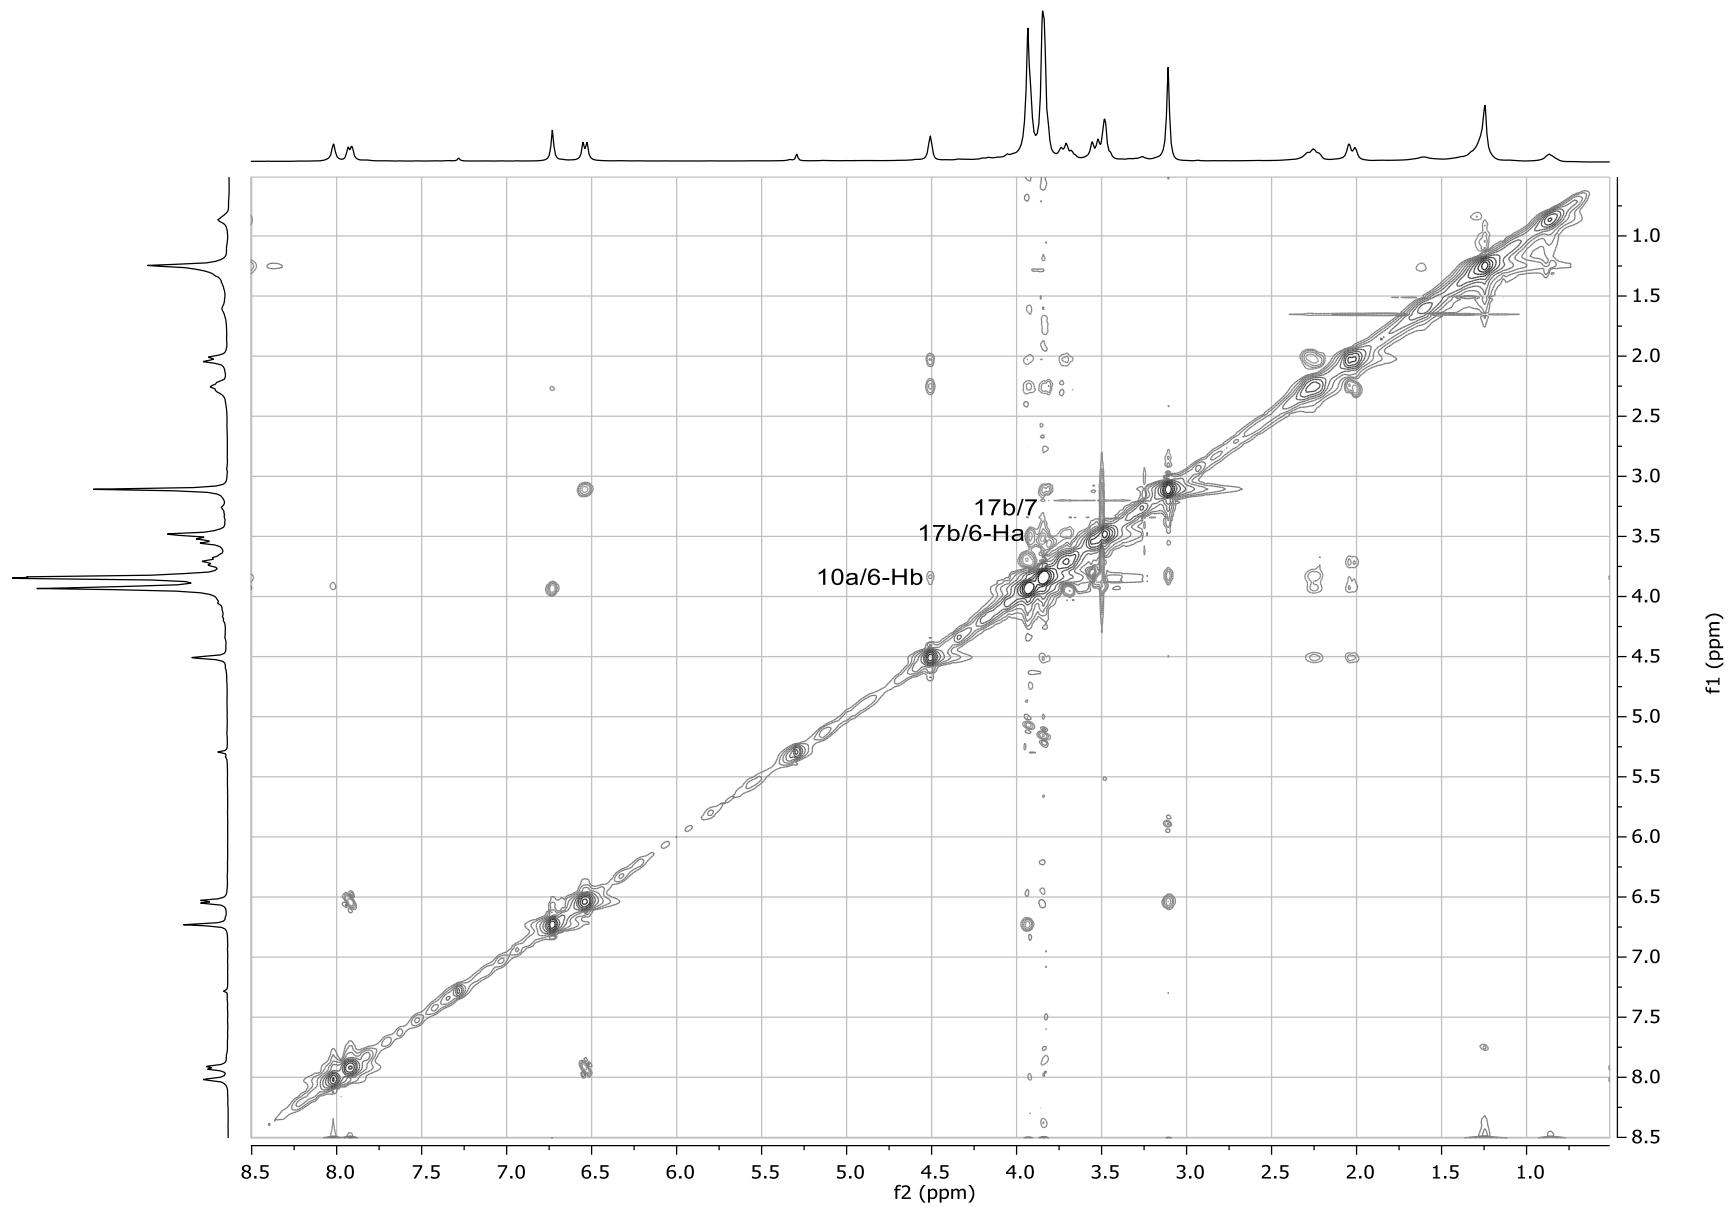

Figure S157. NOESY spectrum of *rac*-(6a*S*\*,10a*S*\*,15b*S*\*)-**10ac** in CDCl<sub>3</sub> at 400 MHz.



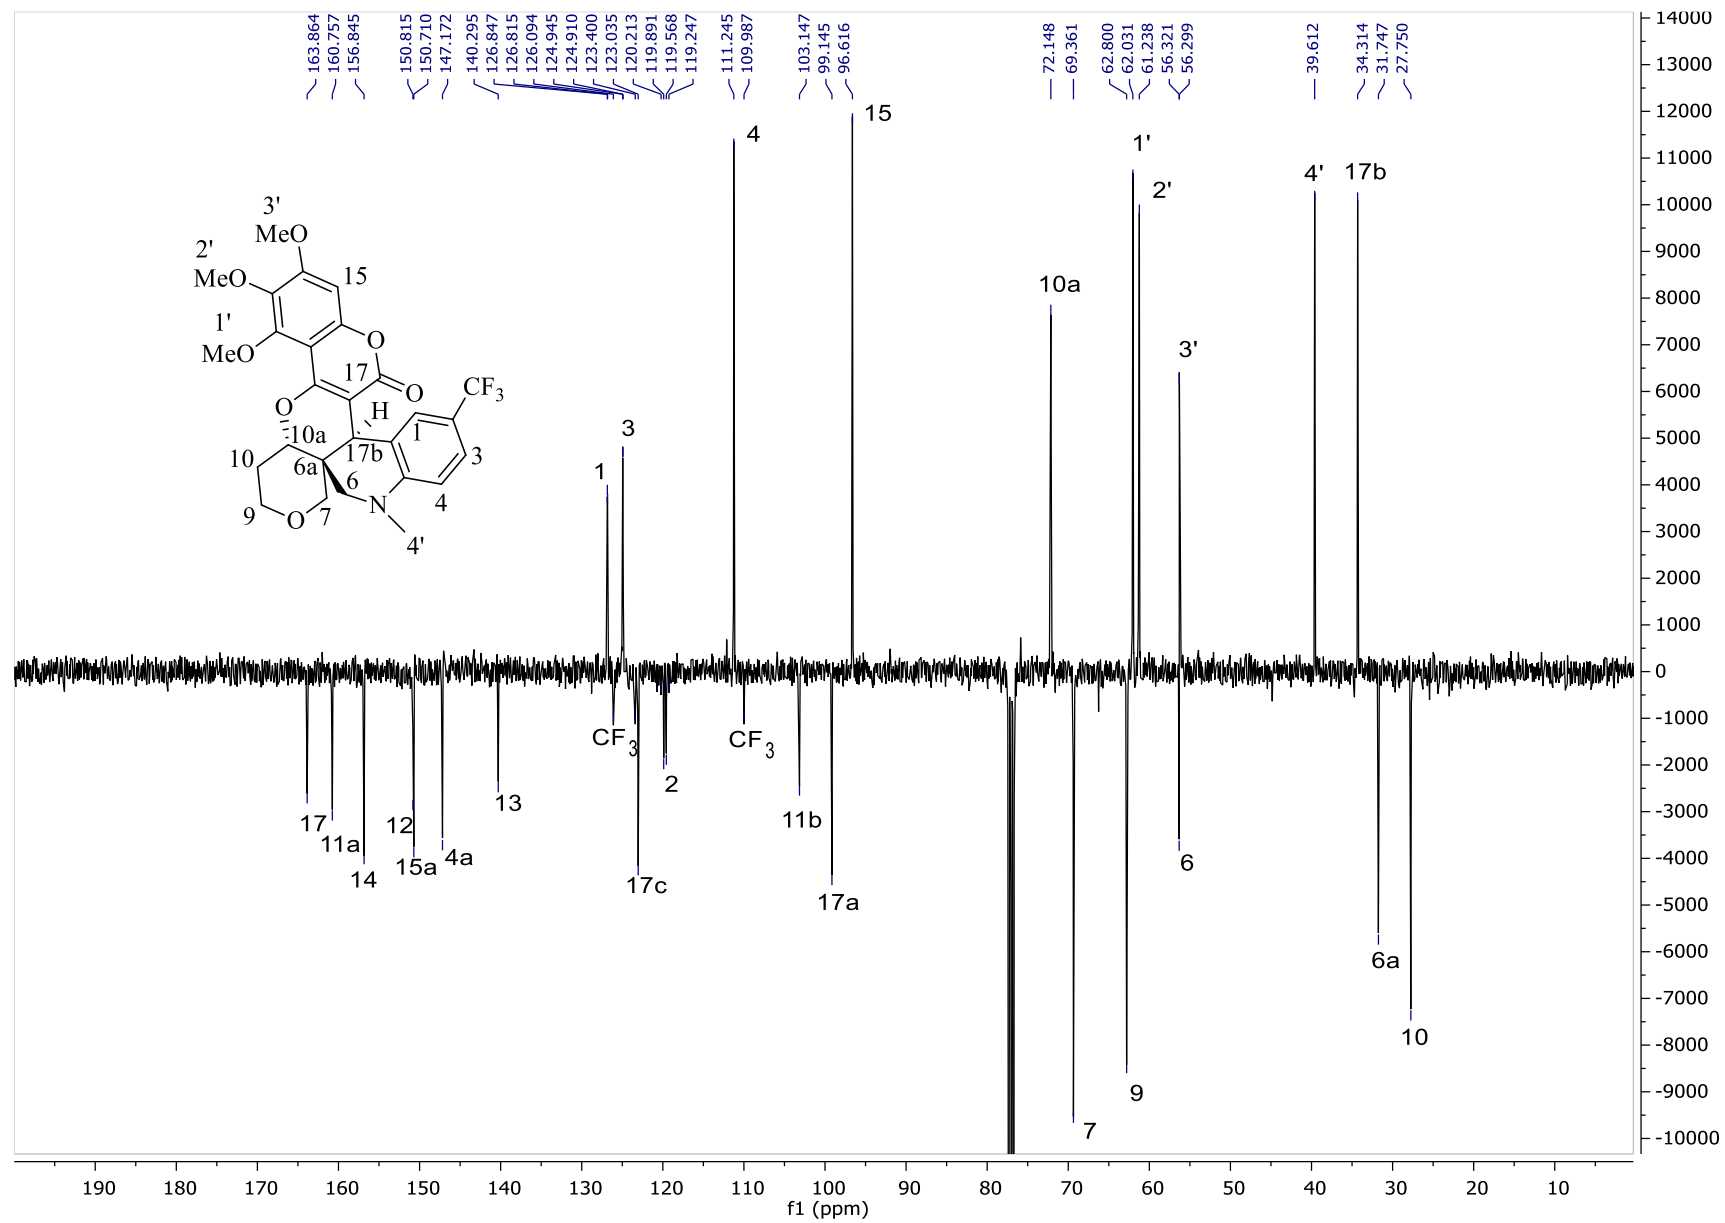

Figure S159. <sup>13</sup>C-NMR spectrum of *rac*-(6a*S*\*,10a*S*\*,15b*S*\*)-**10bc** in CDCl<sub>3</sub> at 100 MHz.

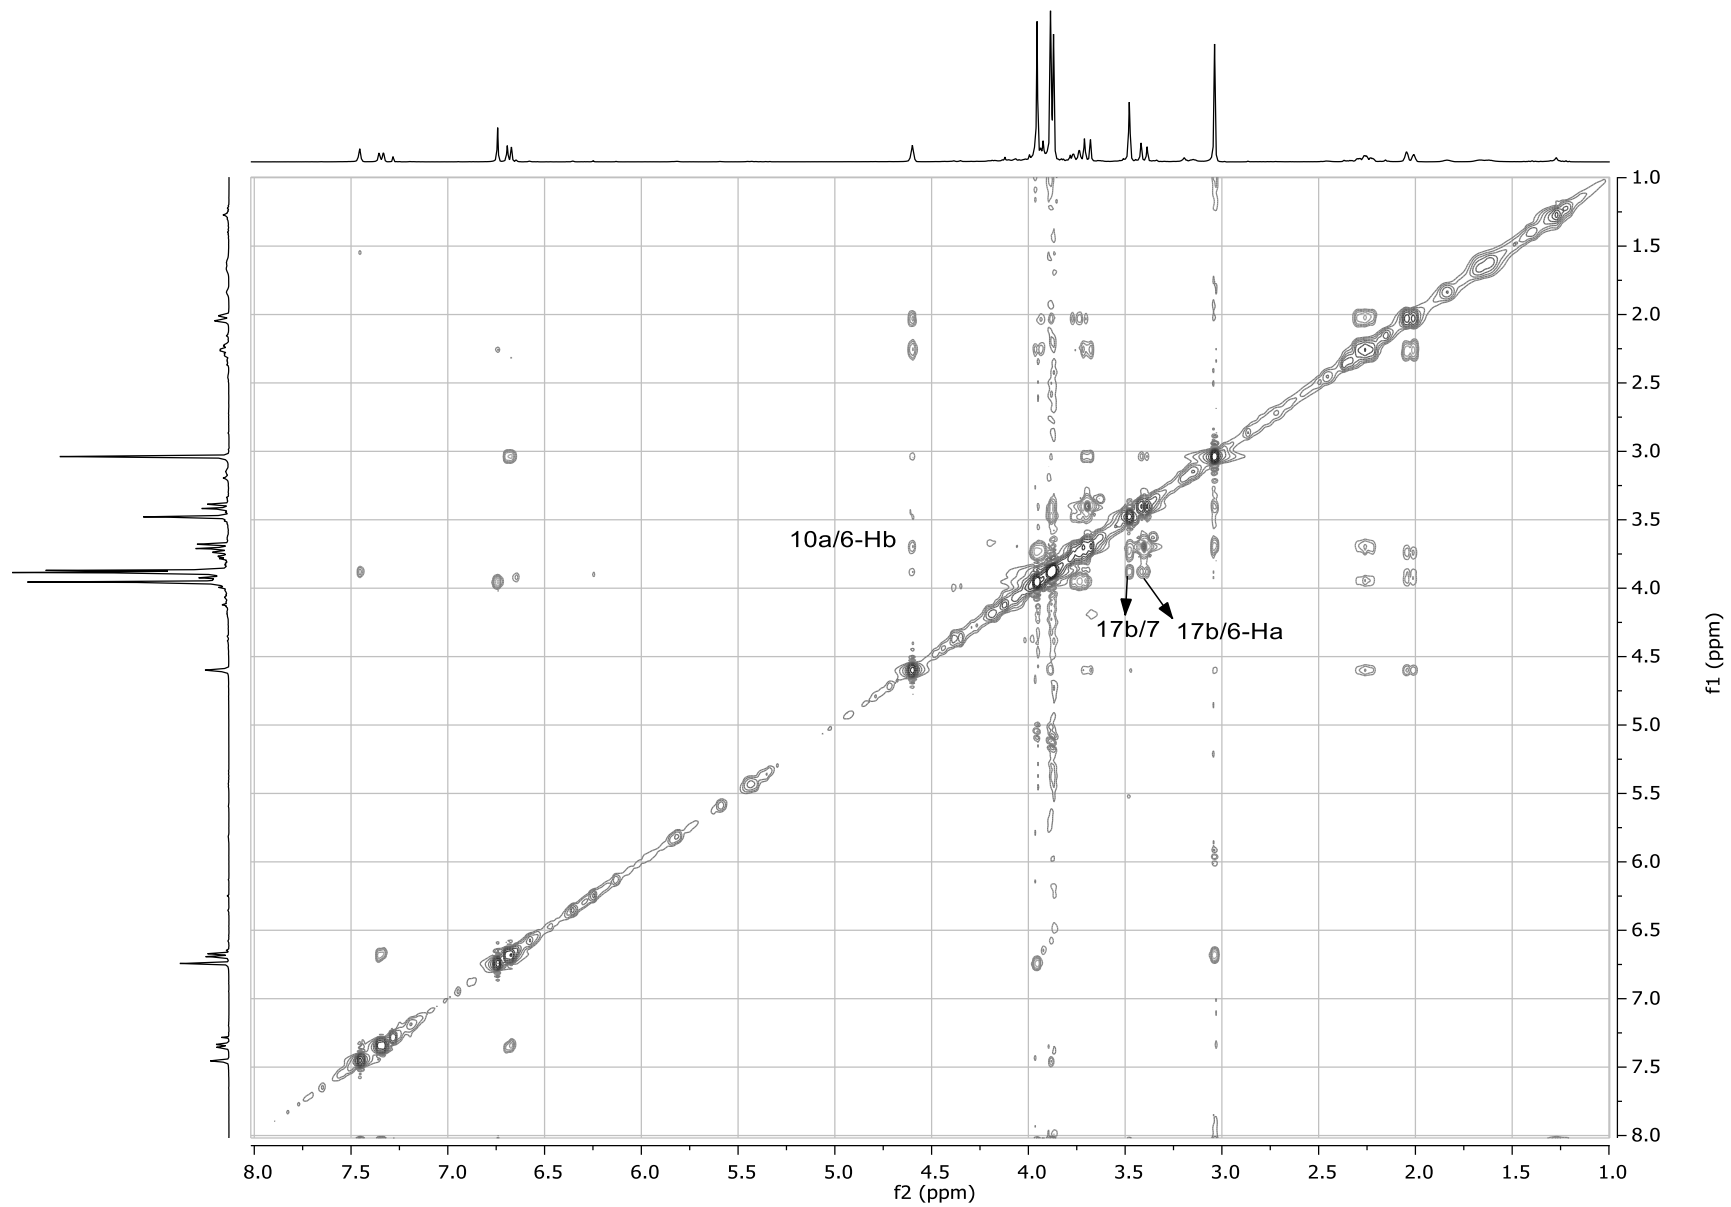

Figure S160. NOESY spectrum of *rac*-(6a*S*\*,10a*S*\*,15b*S*\*)-**10bc** in CDCl<sub>3</sub> at 400 MHz.

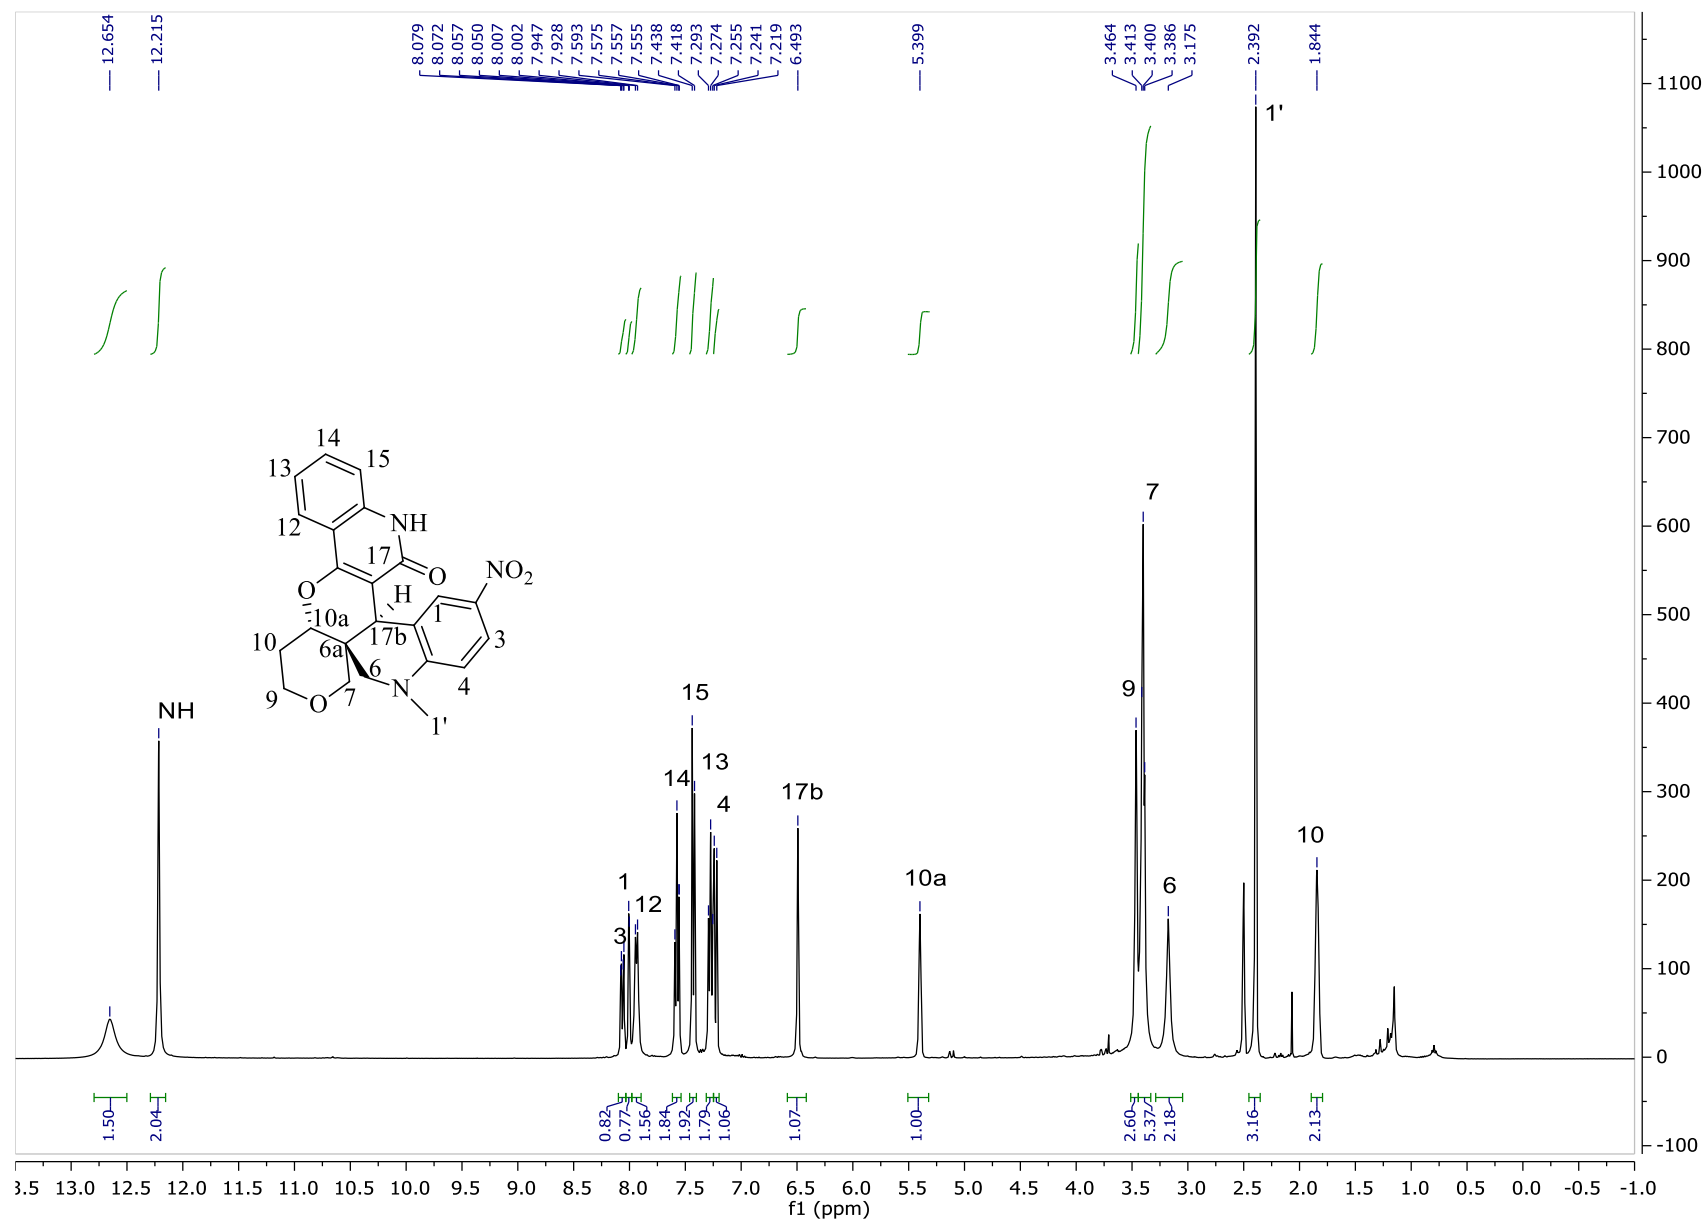

Figure S161. <sup>1</sup>H-NMR spectrum of *rac*-(6aS\*,10aS\*,15bS\*)-**10bd** in DMSO-*d*<sub>6</sub> at 400 MHz.

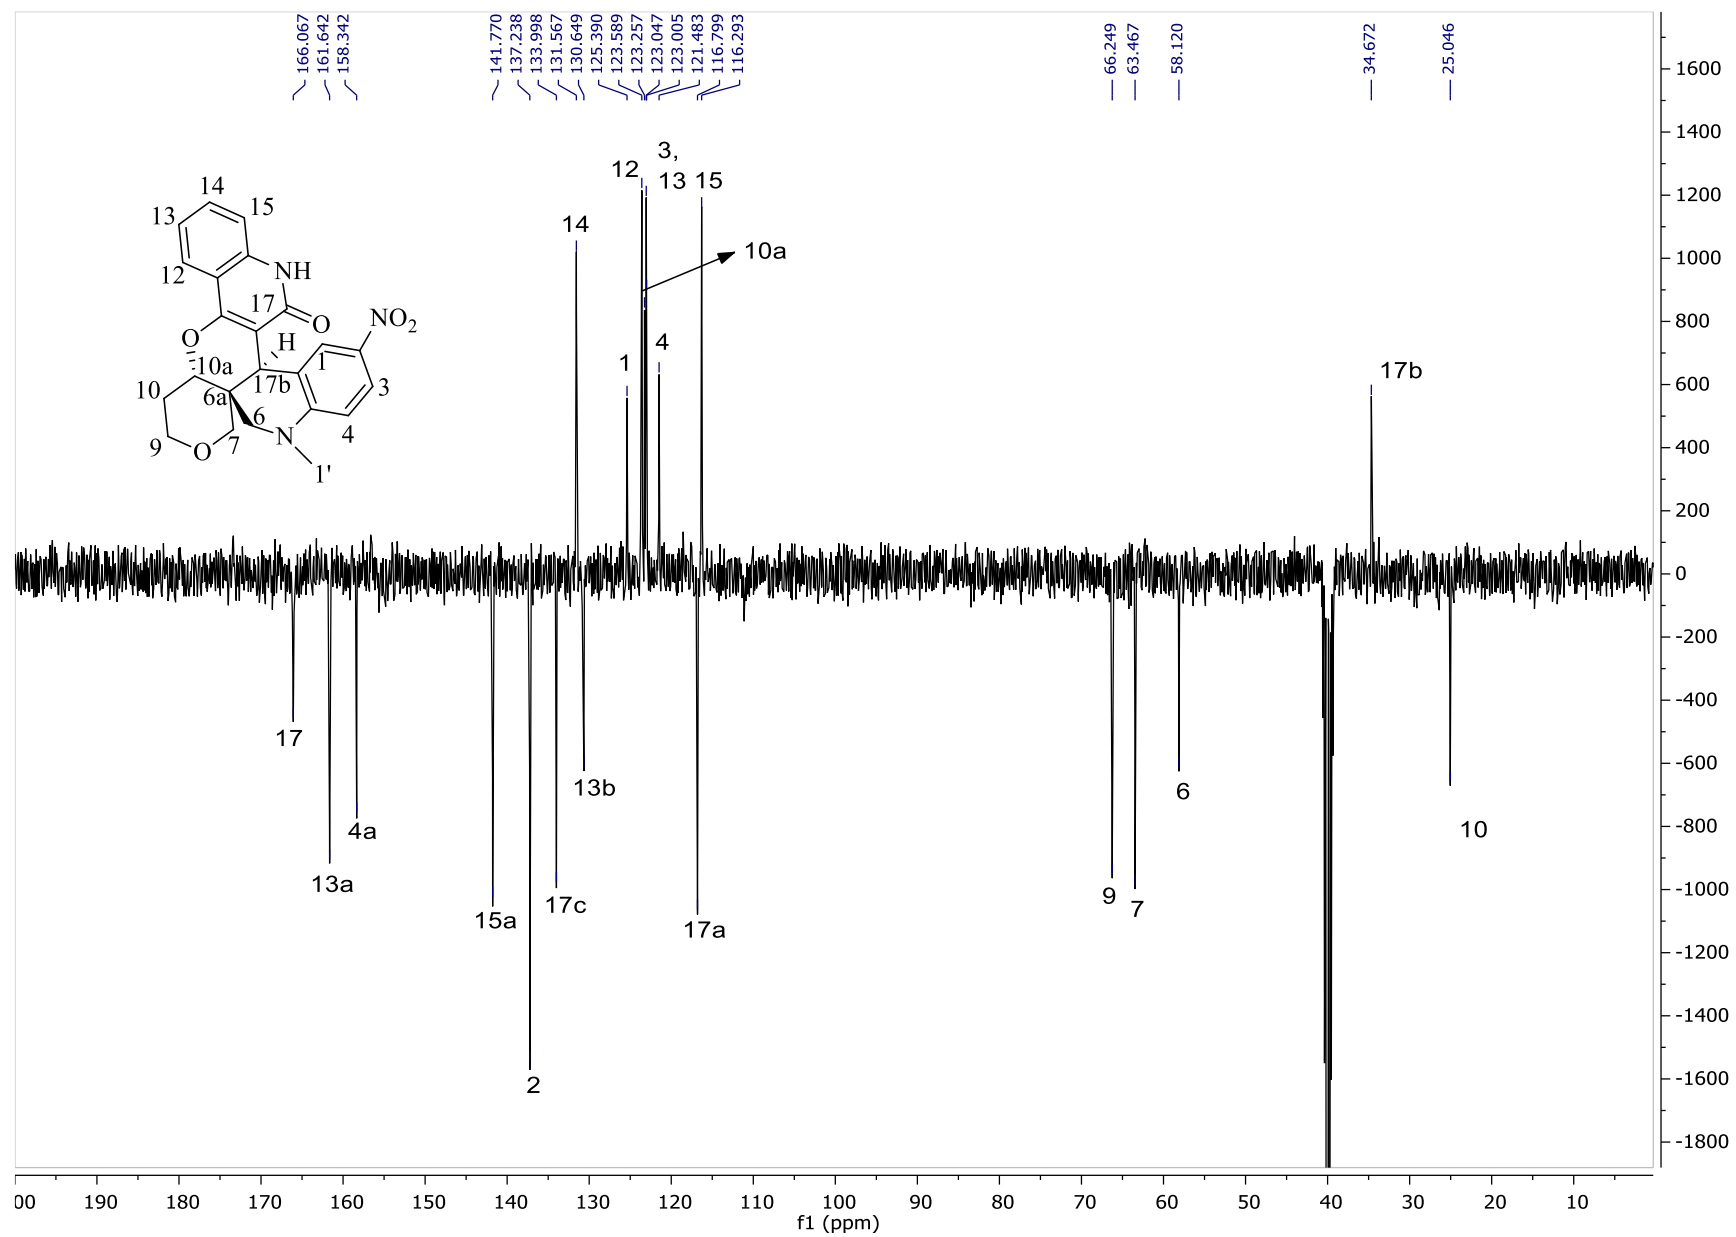

Figure S162. <sup>13</sup>C-NMR spectrum of *rac*-(6a*S*\*,10a*S*\*,15b*S*\*)-10bd in DMSO-*d*<sub>6</sub> at 100 MHz.

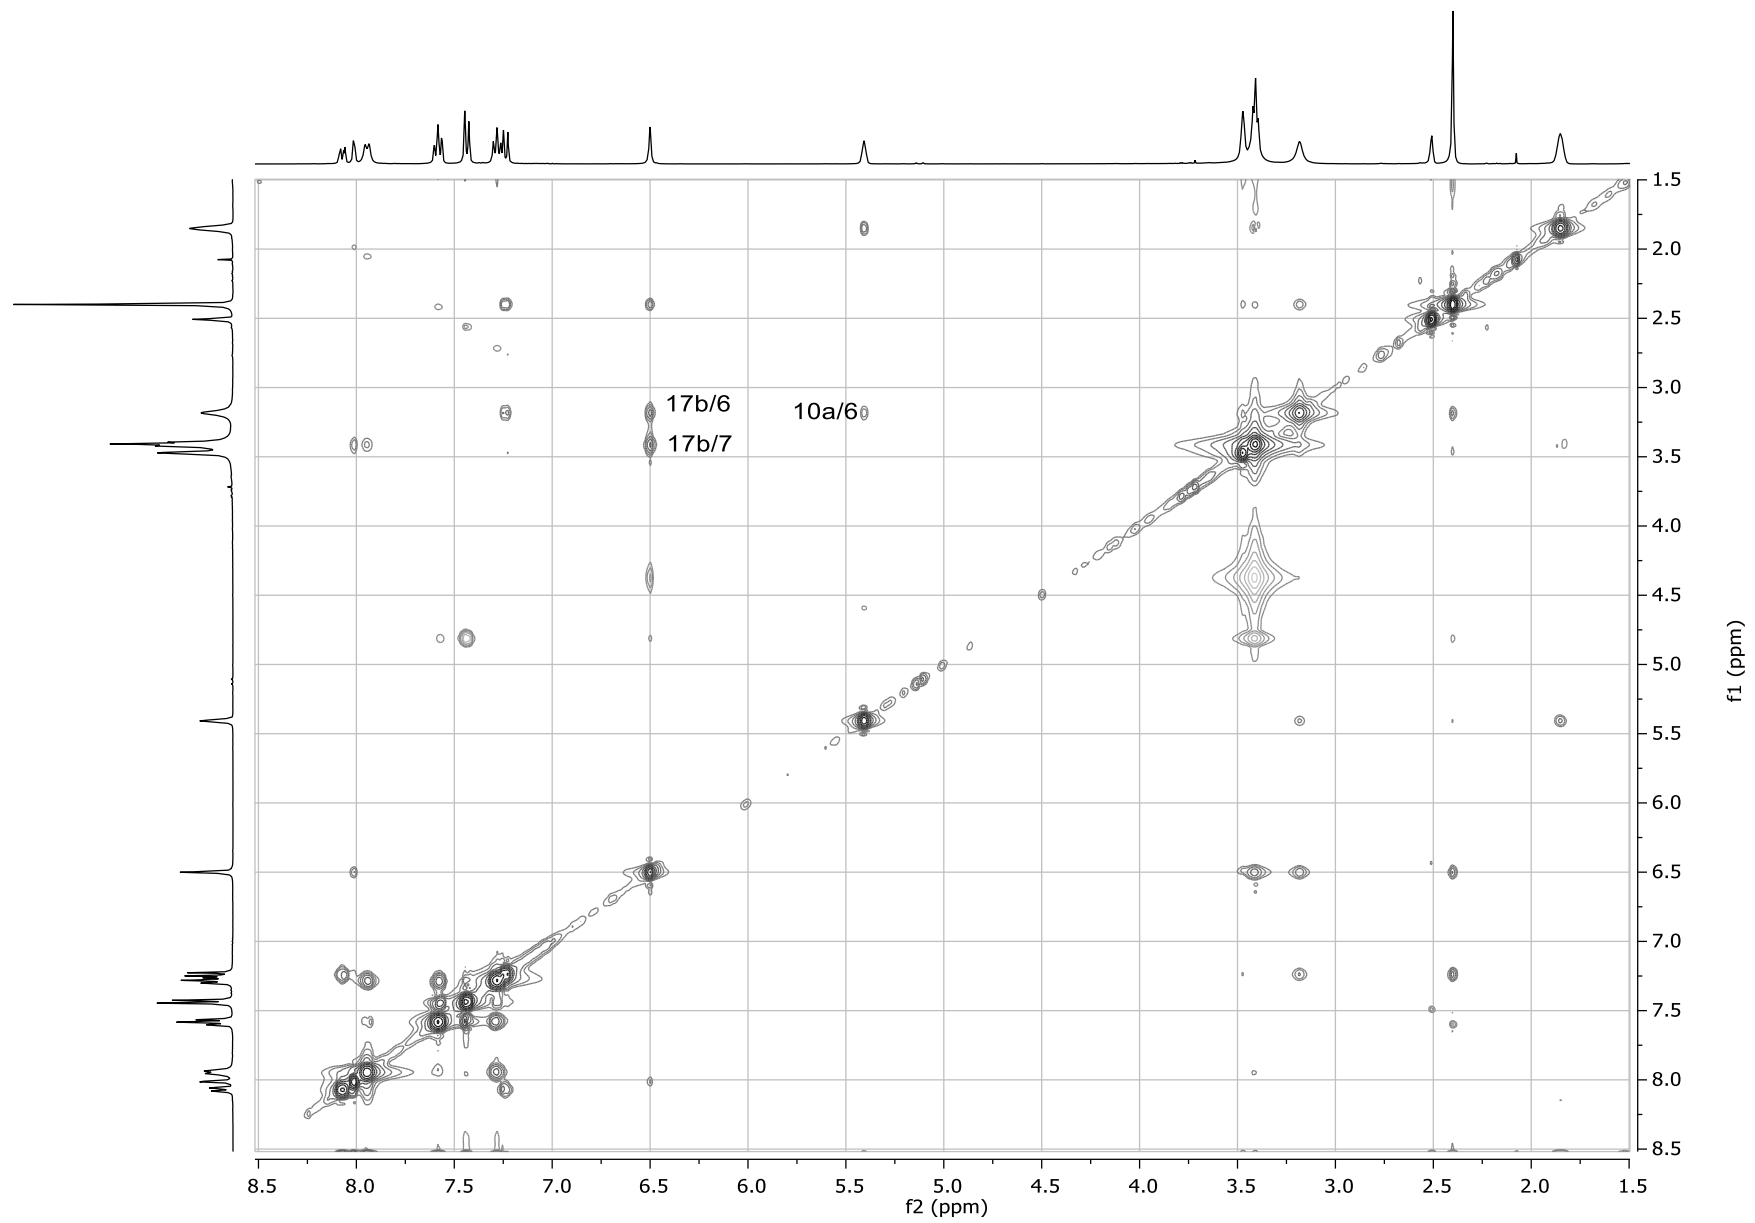

Figure S163. NOESY spectrum of *rac*-(6a*S*\*,10a*S*\*,15b*S*\*)-**10bd** in DMSO-*d*<sub>6</sub> at 400 MHz.

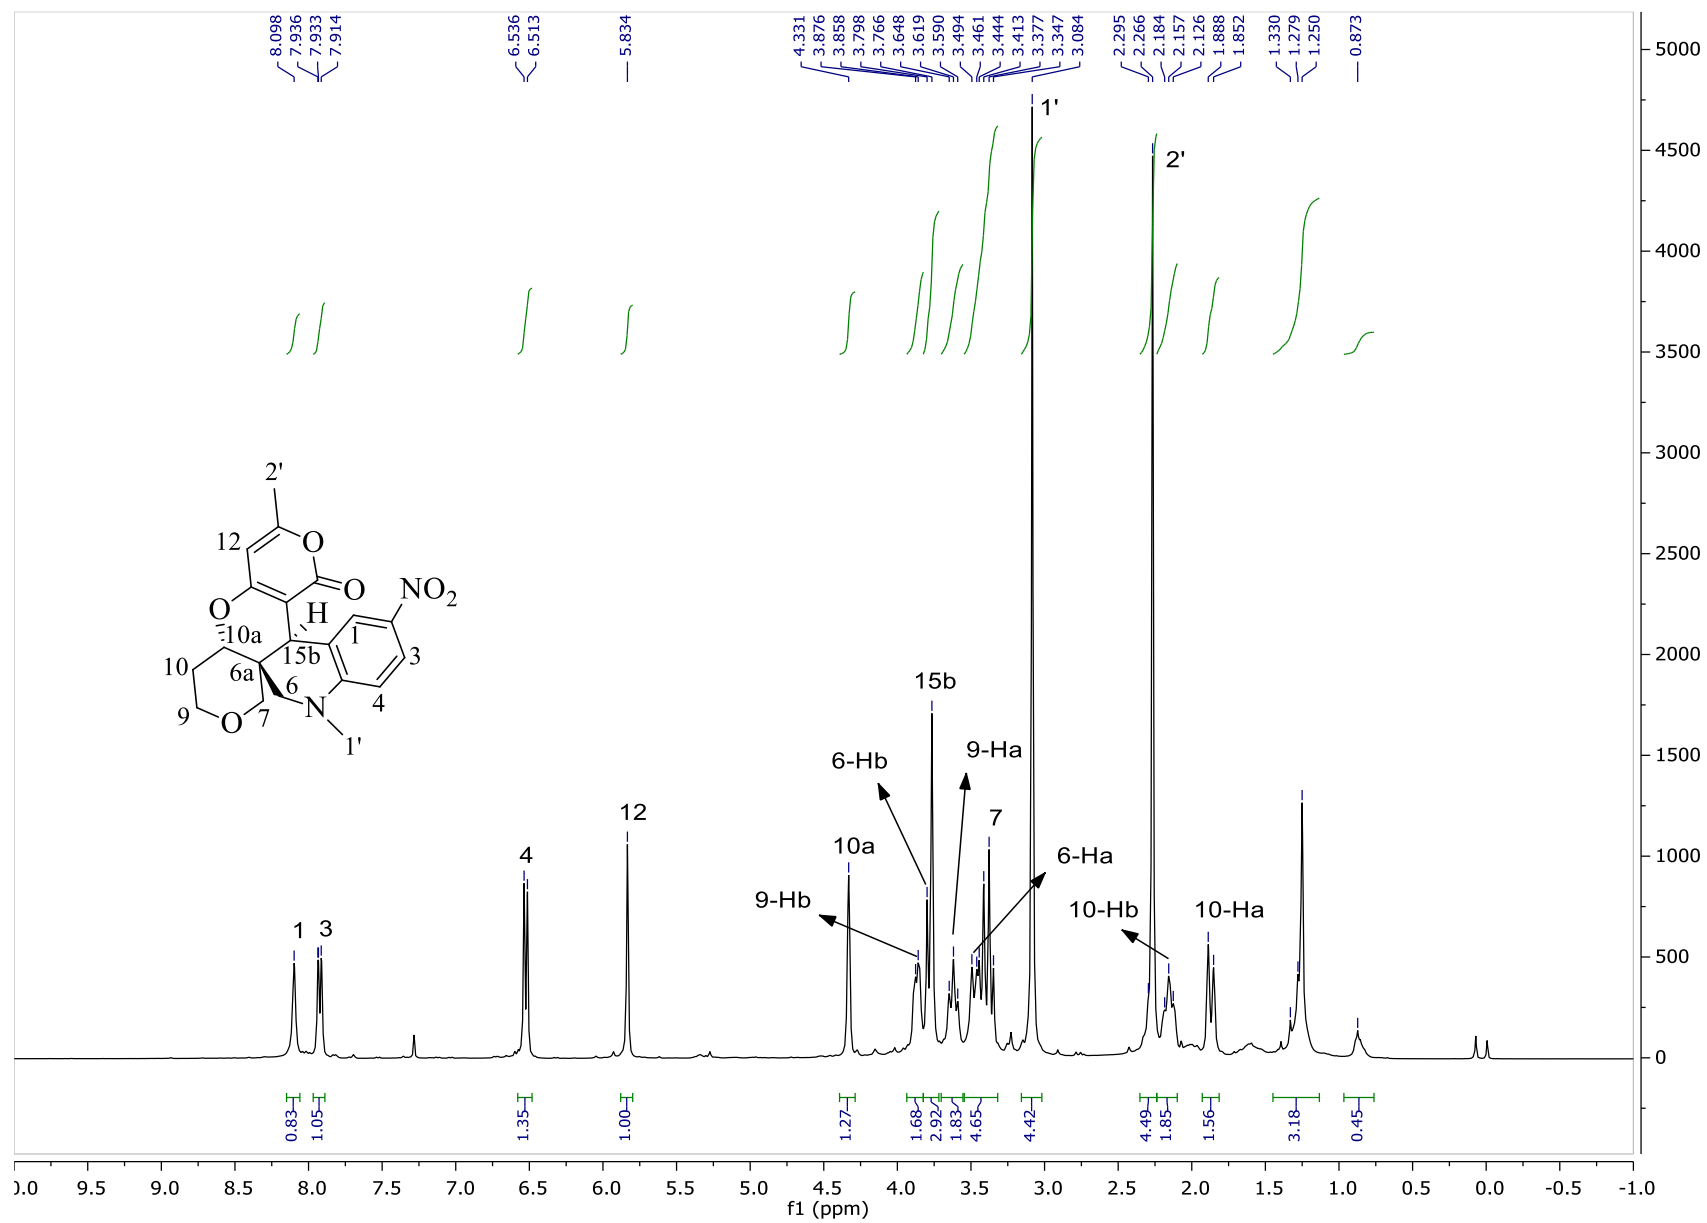

Figure S164. <sup>1</sup>H-NMR spectrum of *rac*-(6aS\*,10aS\*,15bS\*)-10ae in CDCl<sub>3</sub> at 400 MHz.

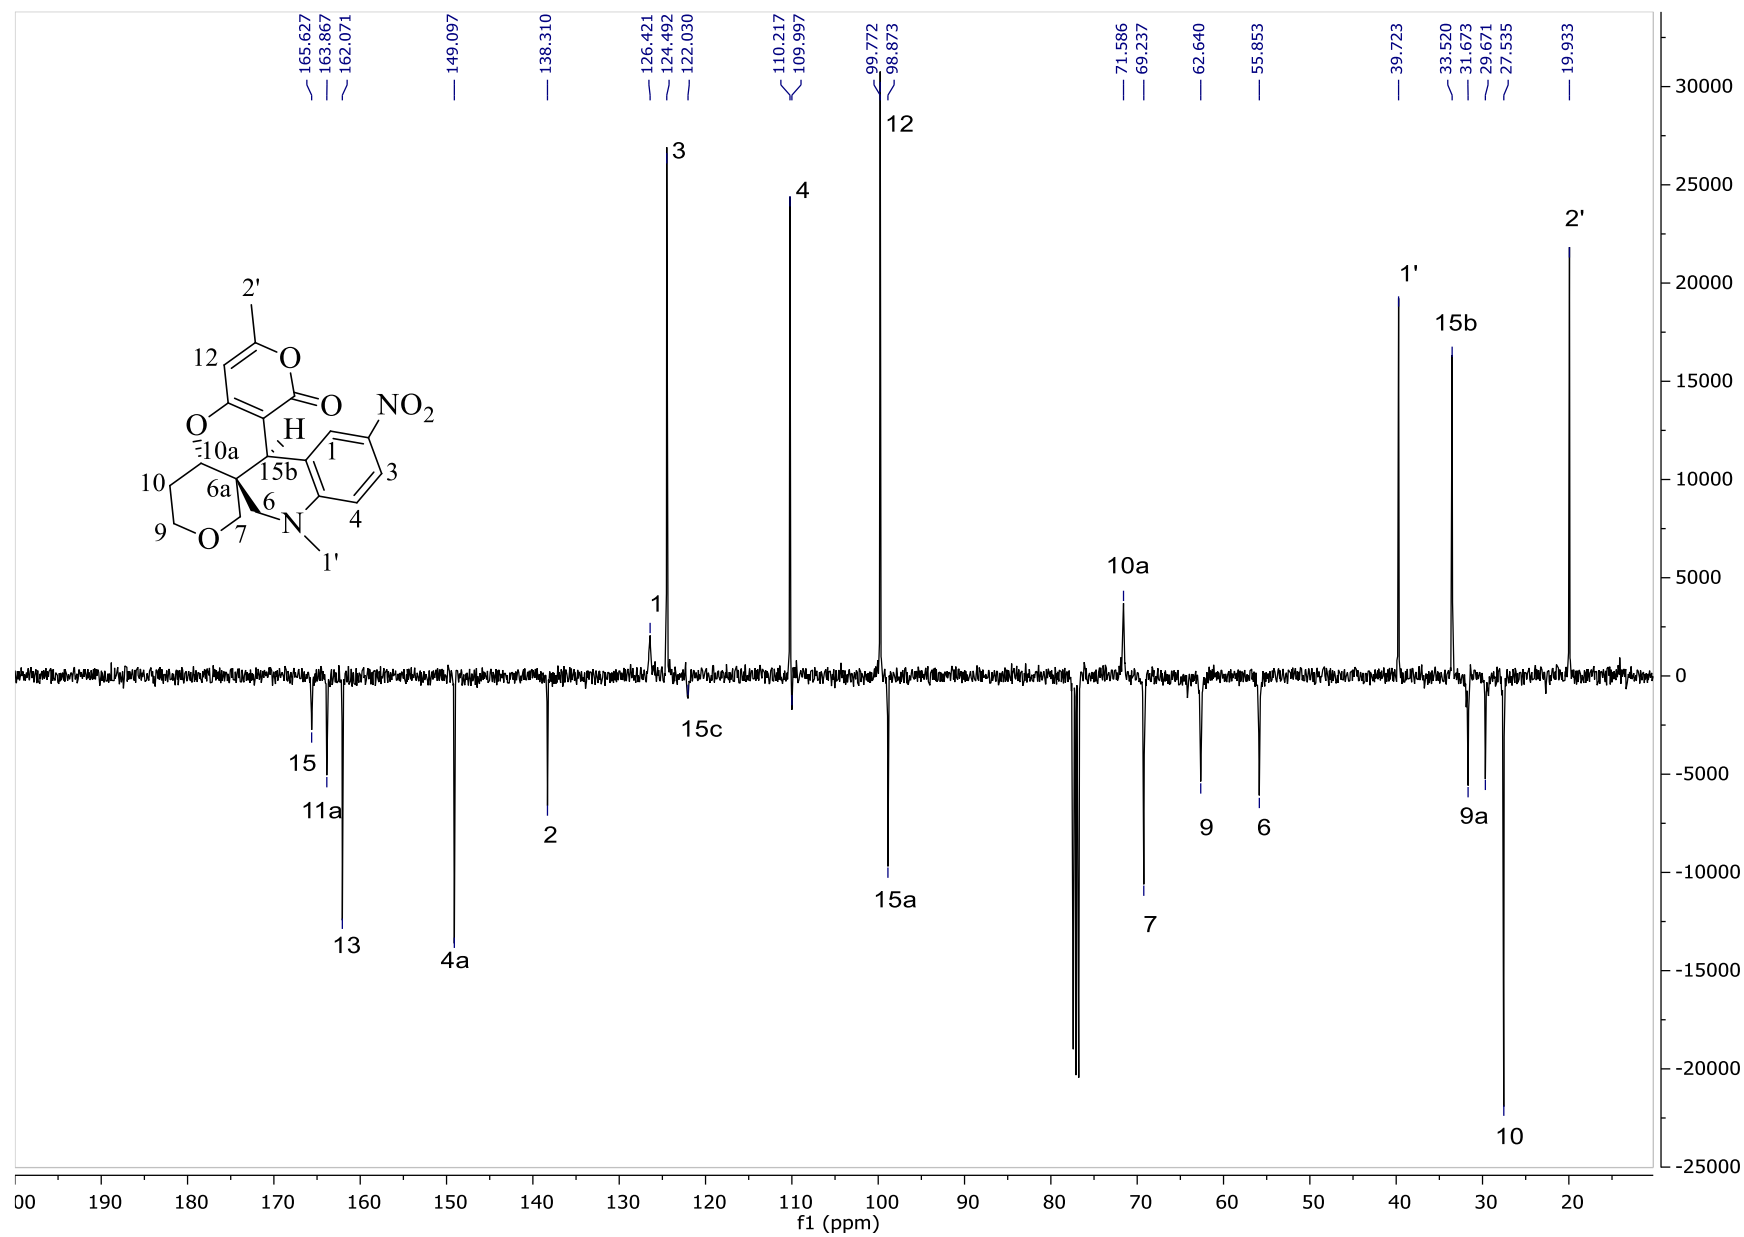

Figure S165. <sup>13</sup>C-NMR spectrum of *rac*-(6a*S*\*,10a*S*\*,15b*S*\*)-10ae in CDCl<sub>3</sub> at 100 MHz.

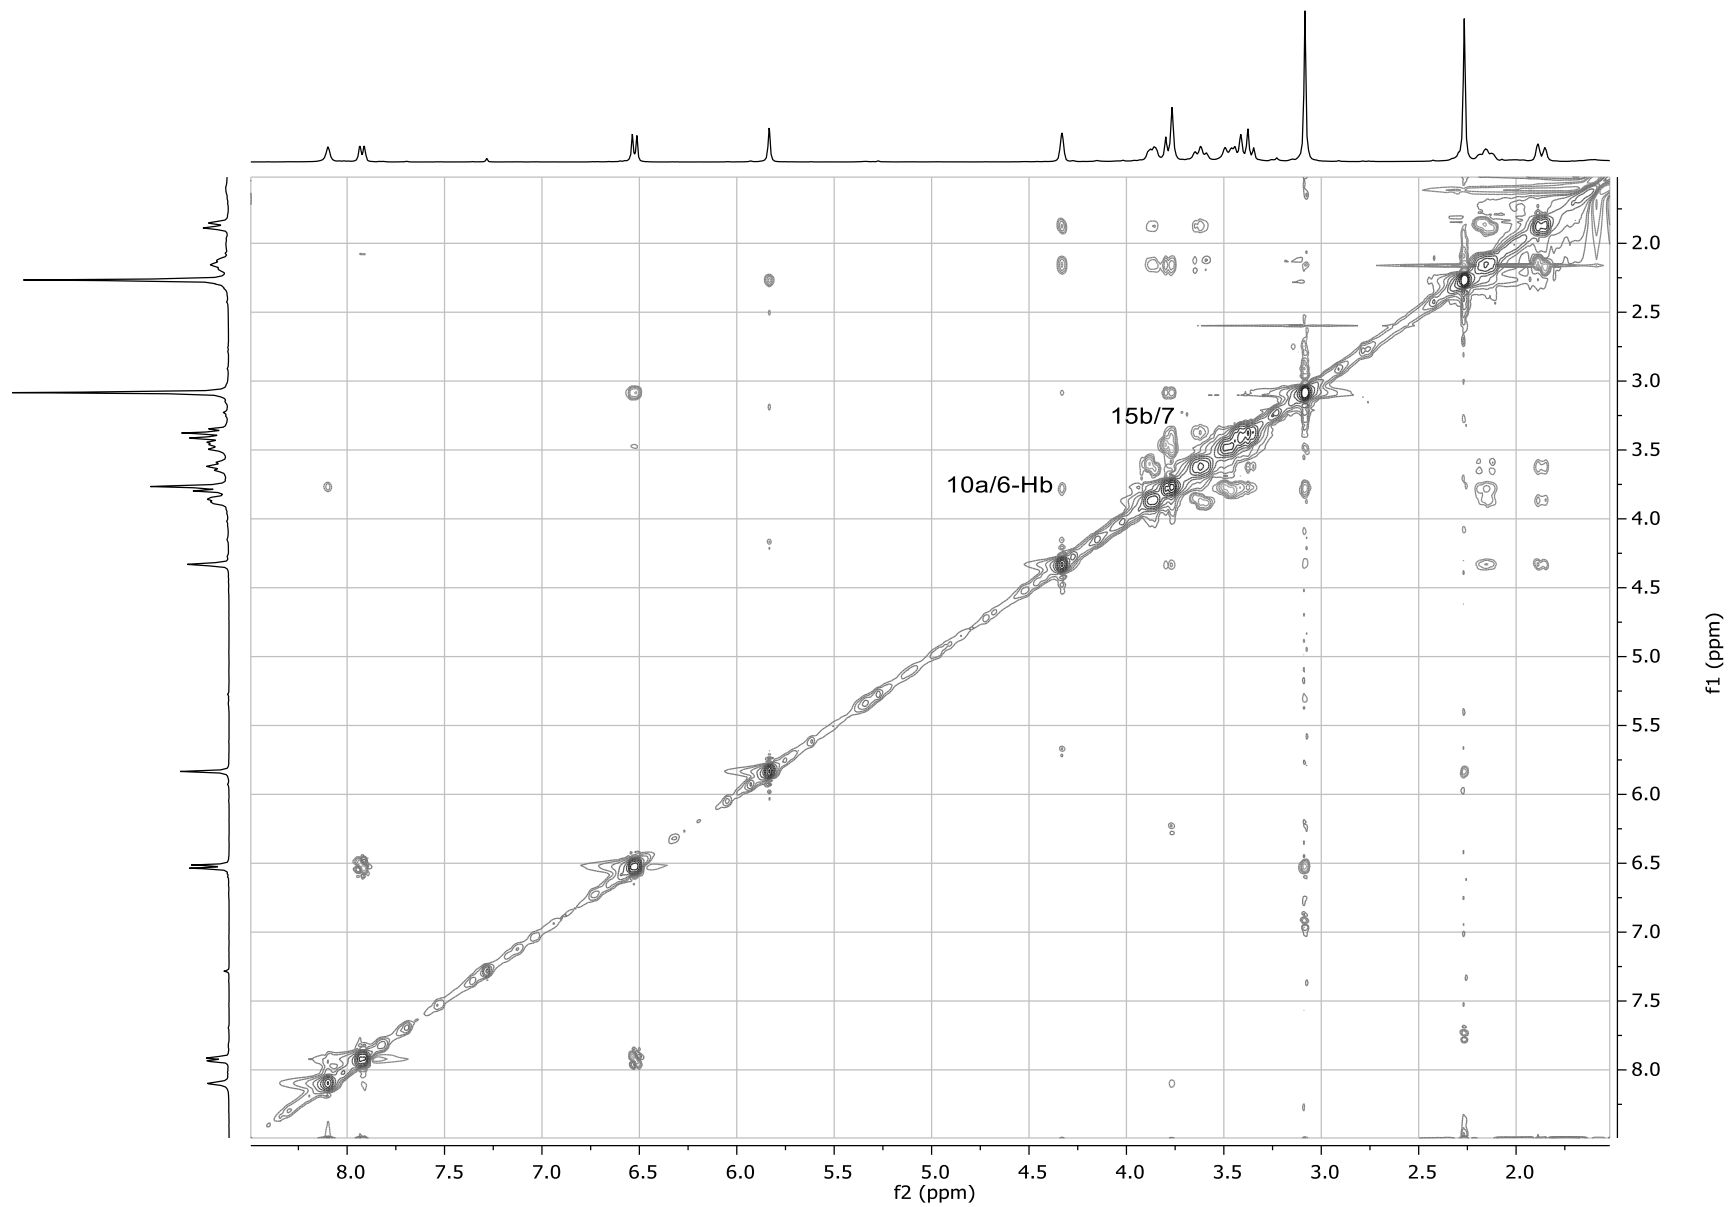

Figure S166. NOESY spectrum of *rac*-(6a*S*\*,10a*S*\*,15b*S*\*)-**10ae** in CDCl<sub>3</sub> at 400 MHz.

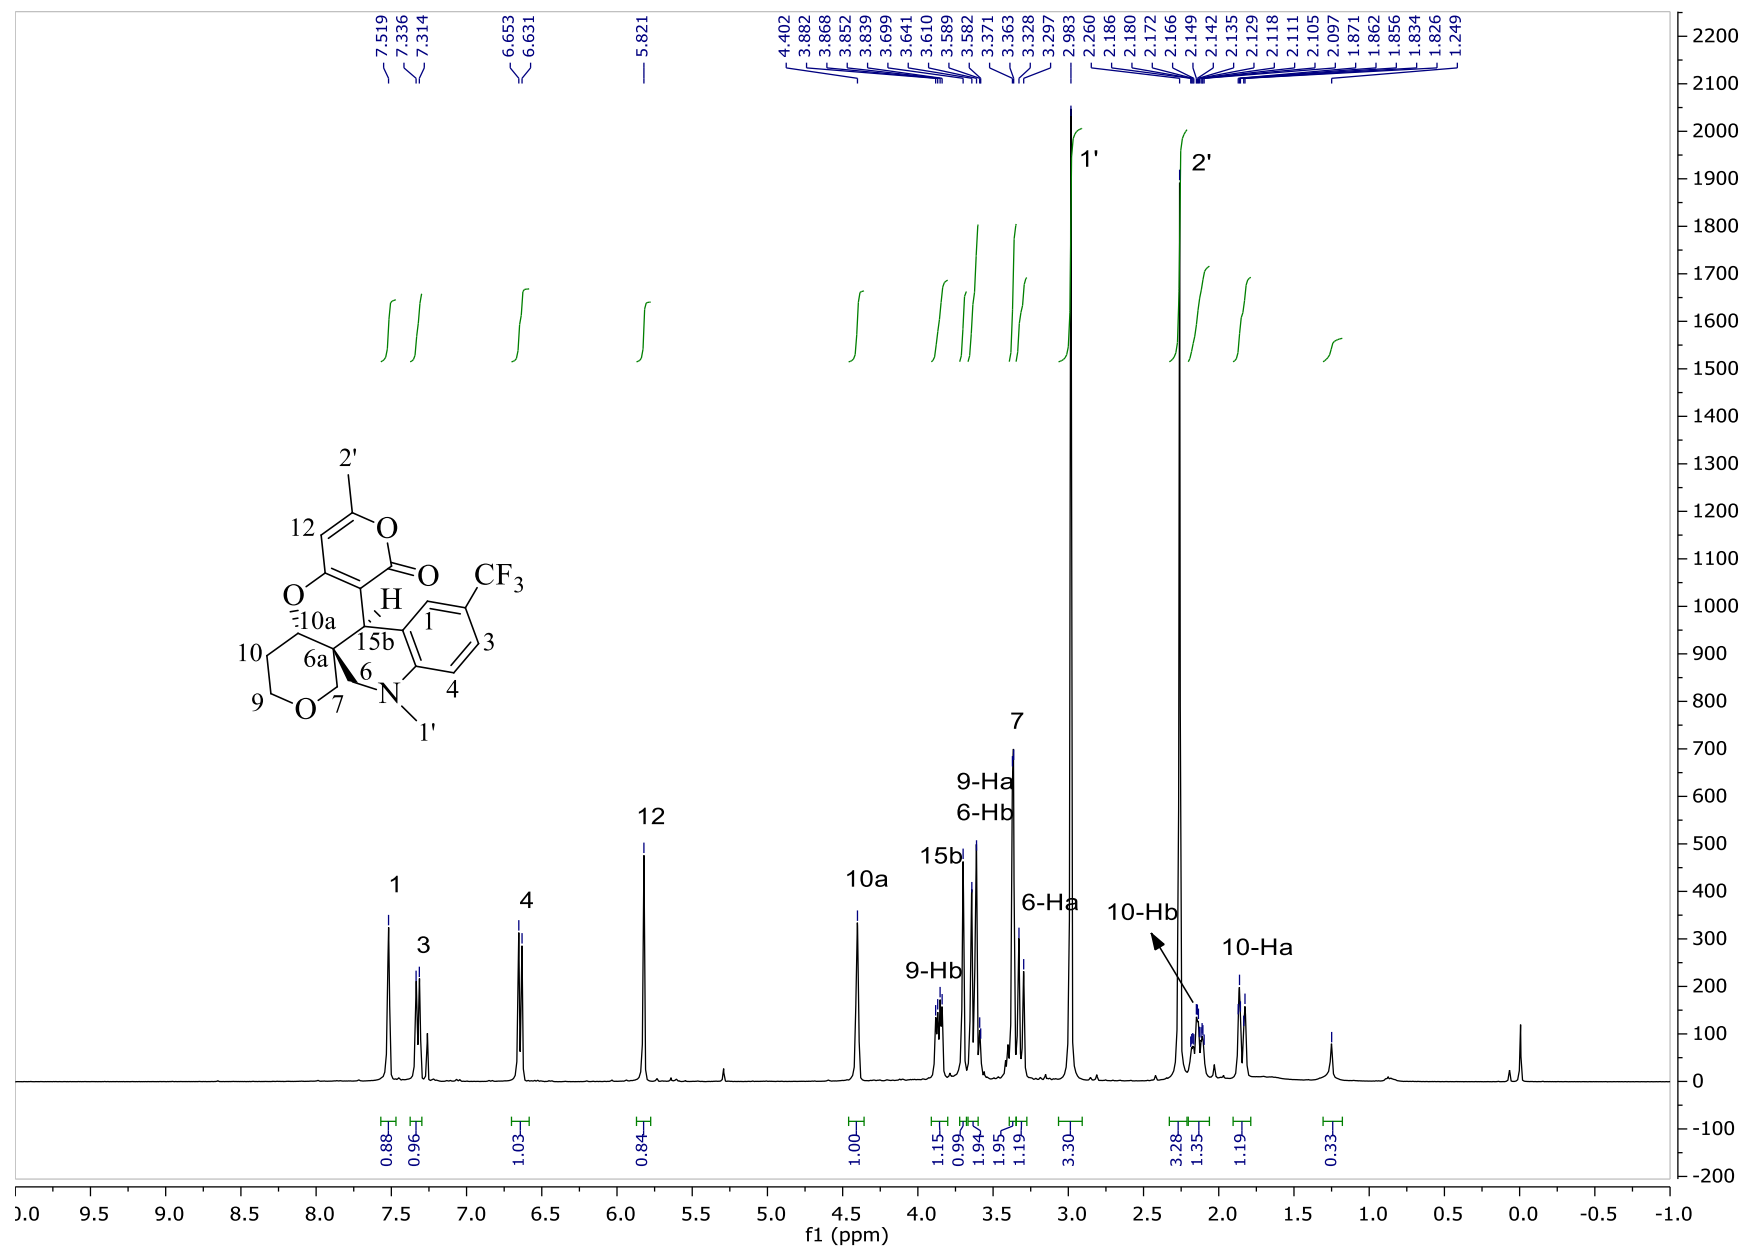

Figure S167. <sup>1</sup>H-NMR spectrum of *rac*-(6a*S*<sup>\*</sup>,10a*S*<sup>\*</sup>,15b*S*<sup>\*</sup>)-**10be** in CDCl<sub>3</sub> at 400 MHz.

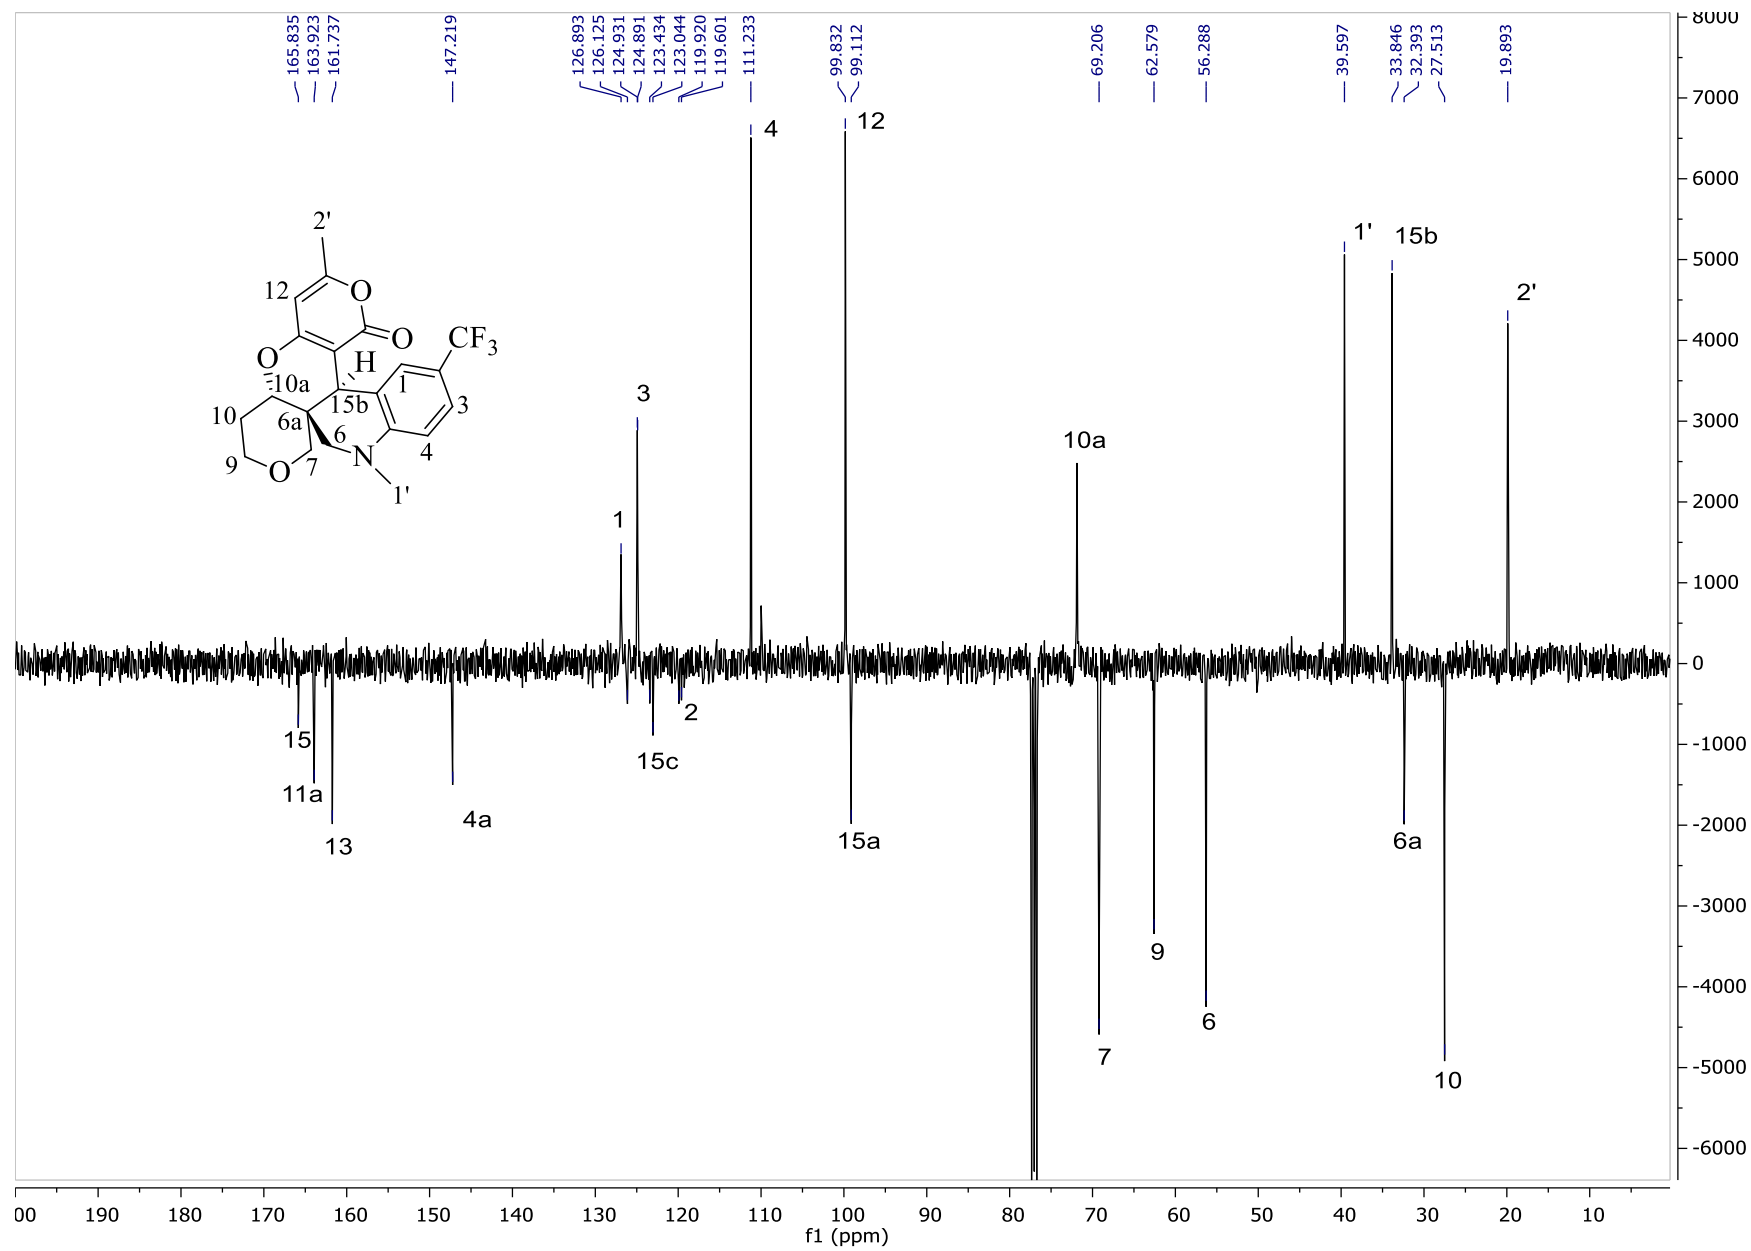

Figure S168.  $^{13}\text{C}$ -NMR spectrum of *rac*-(6a*S*\*,10a*S*\*,15b*S*\*)-10b*e* in  $\text{CDCl}_3$  at 100 MHz.

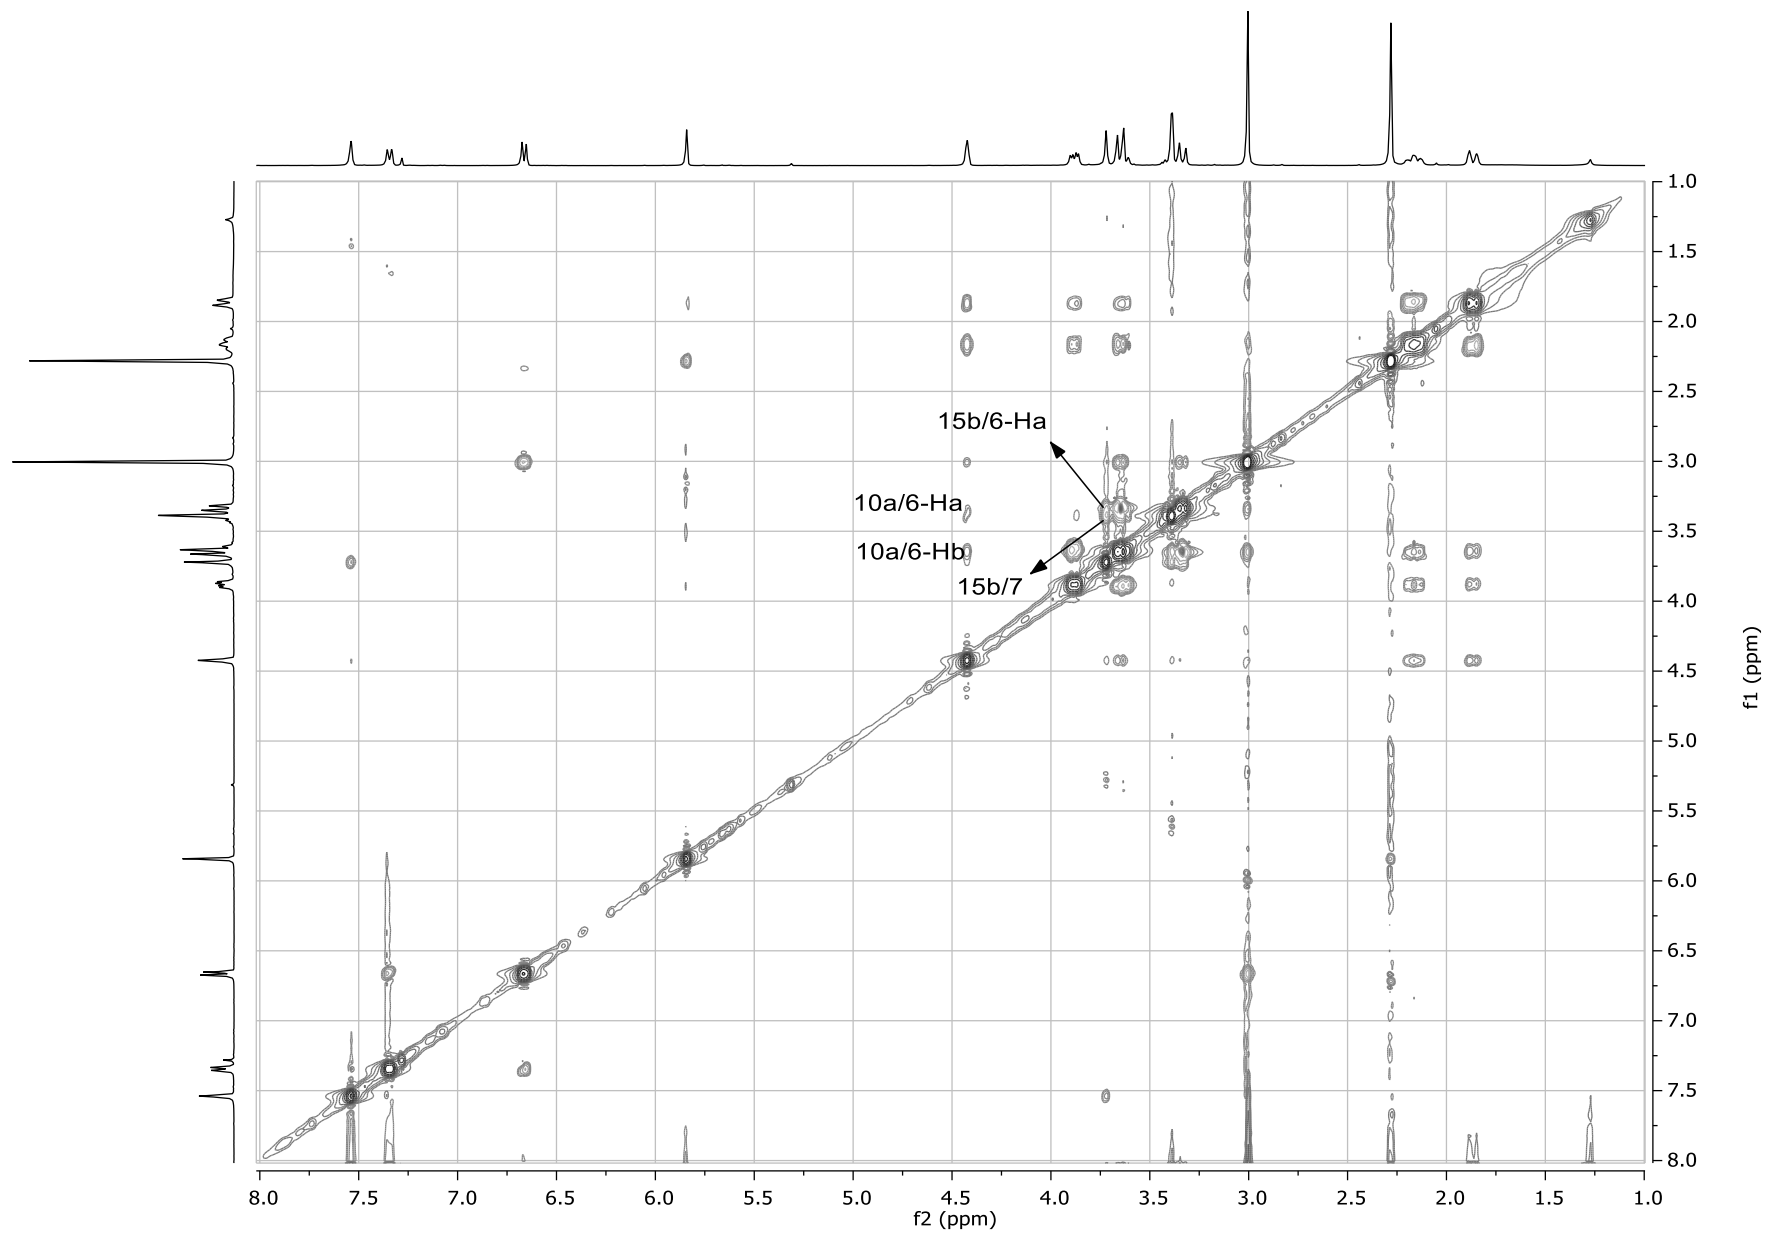

Figure S169. NOESY spectrum of *rac*-(6a*S*\*,10a*S*\*,15b*S*\*)-**10be** in CDCl<sub>3</sub> at 400 MHz.

### 3. ECD and HPLC-ECD spectra of condensed heterocycles

#### 3.1. ECD Spectra of **4ba-be**, **6ba-be** and **5ba-be**:

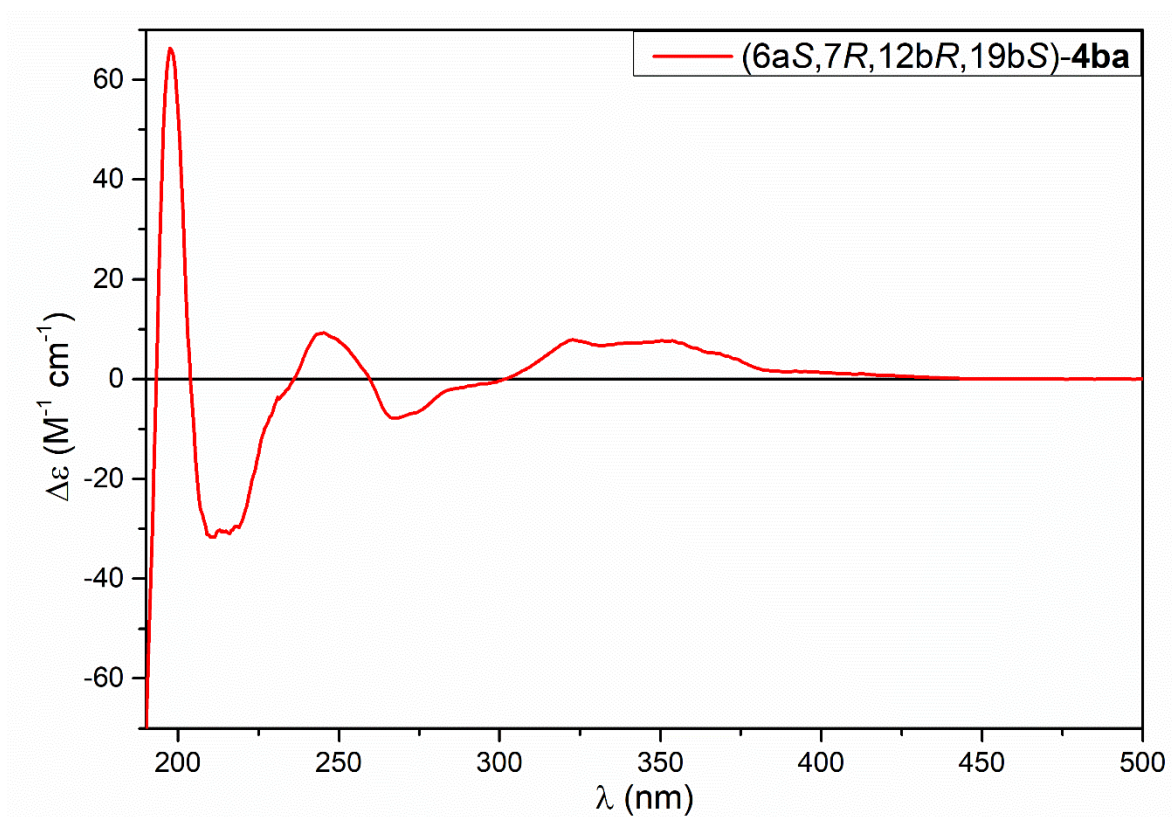

Figure S170. ECD spectrum of (6aS,7R,12bR,17bS)-**4ba** in MeCN.

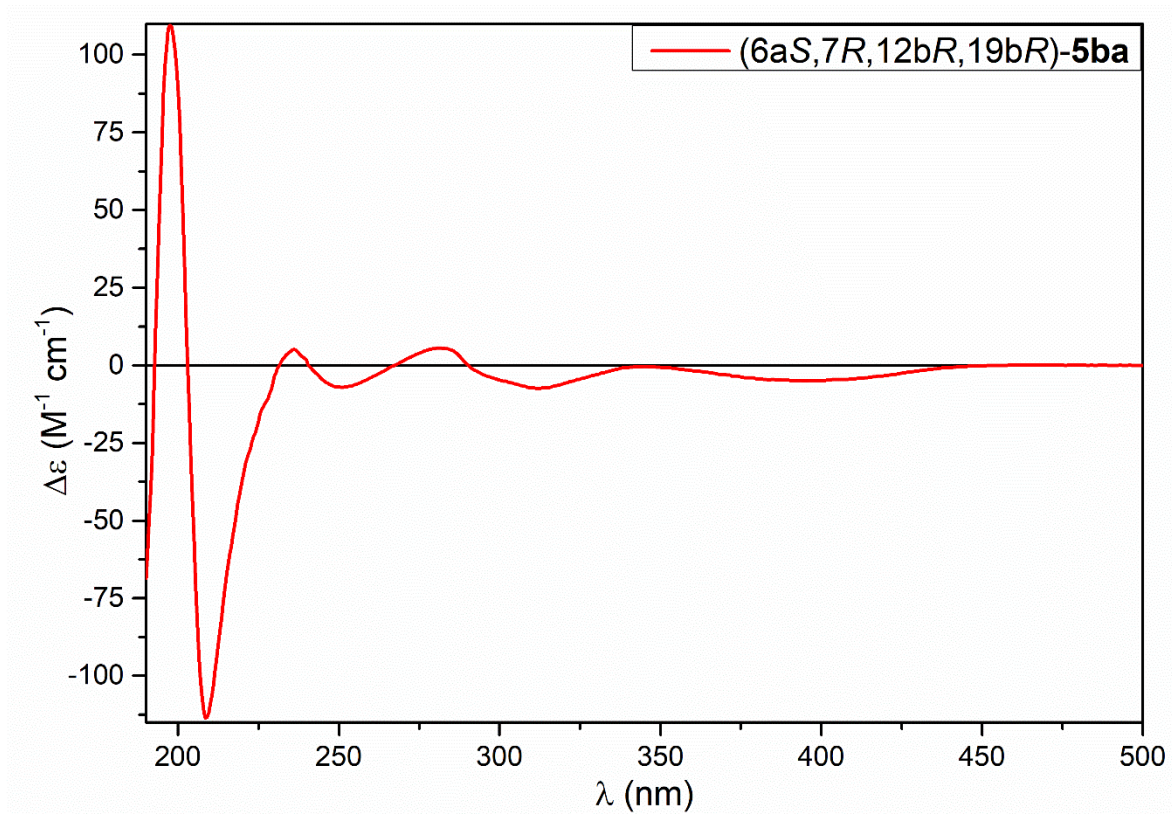

Figure S171. ECD spectrum of (6aS,7R,12bR,17bR)-**5ba** in MeCN.

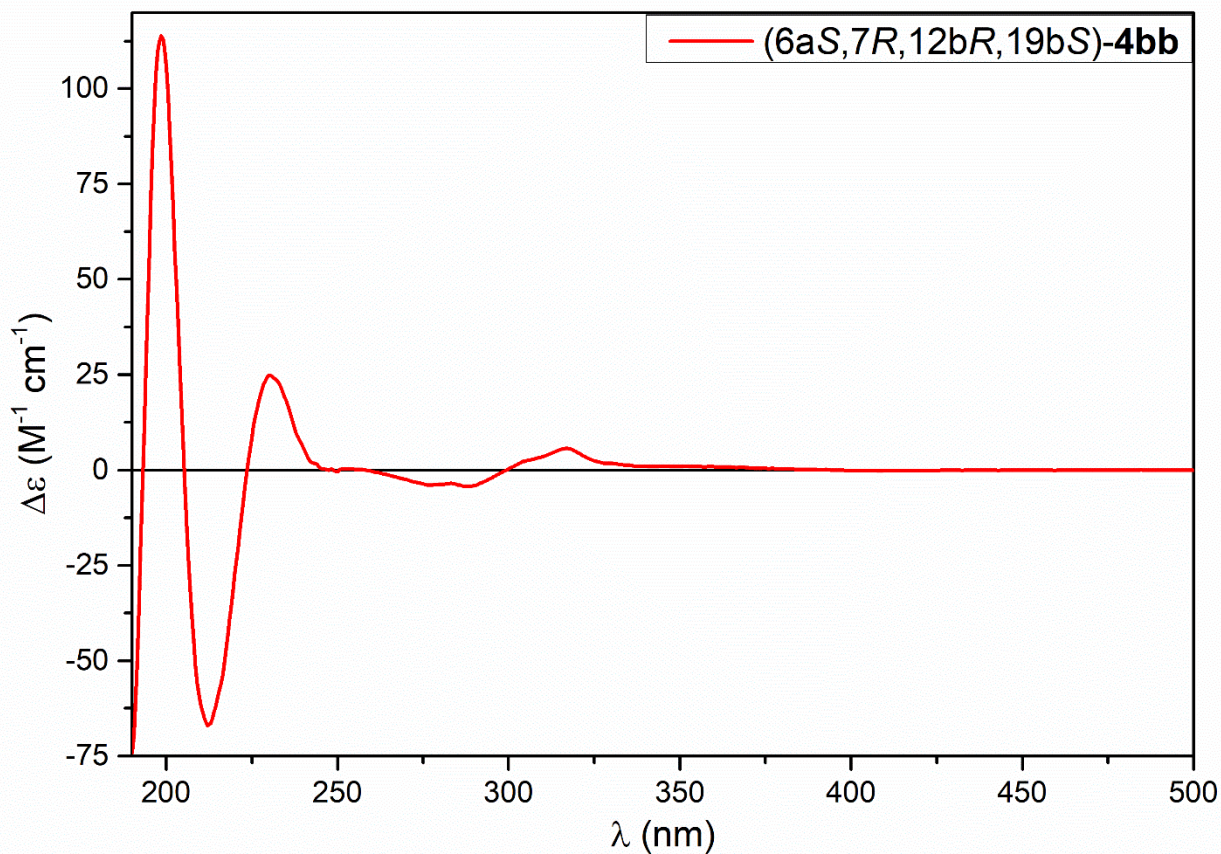

Figure S172. ECD spectrum of (6a*S*,7*R*,12*bR*,17*bS*)-**4bb** in MeCN.

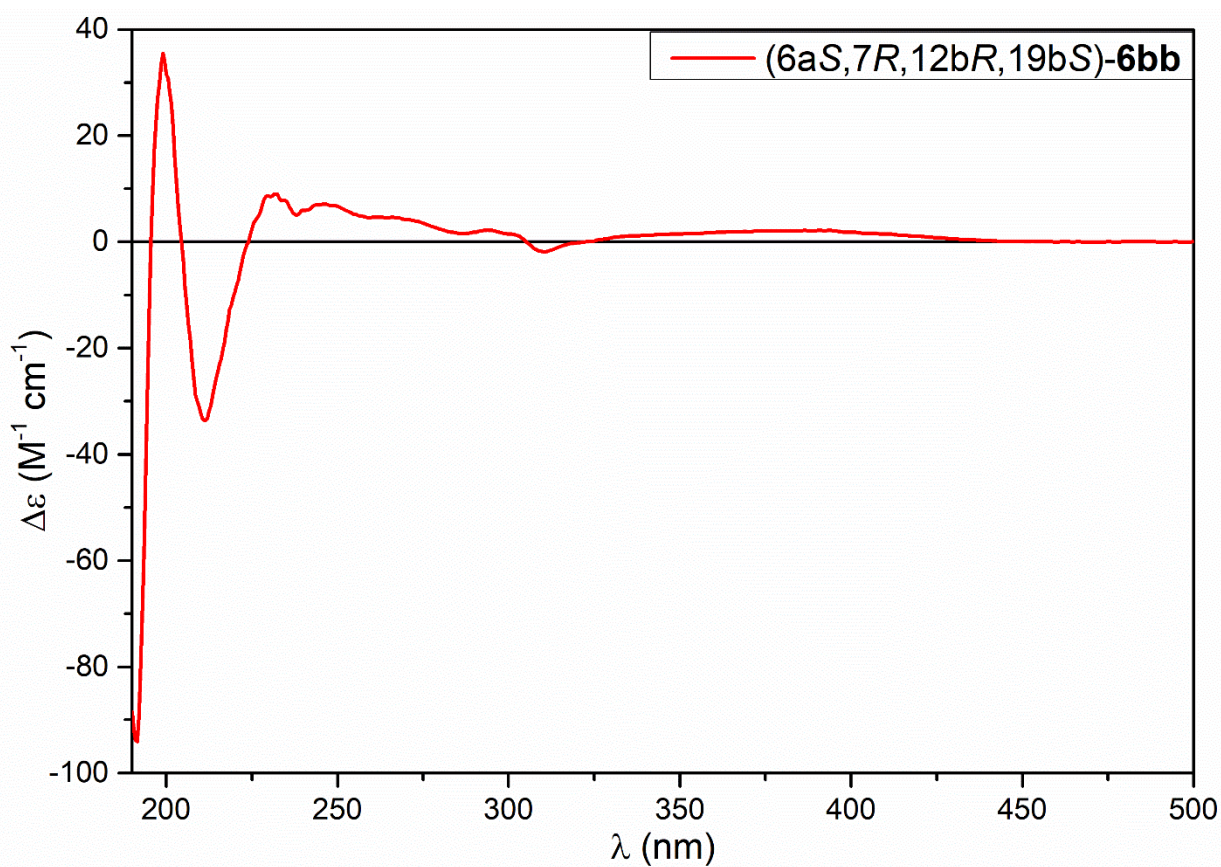

Figure S173. ECD spectrum of (6a*S*,7*R*,12*bR*,17*bS*)-**6bb** in MeCN.

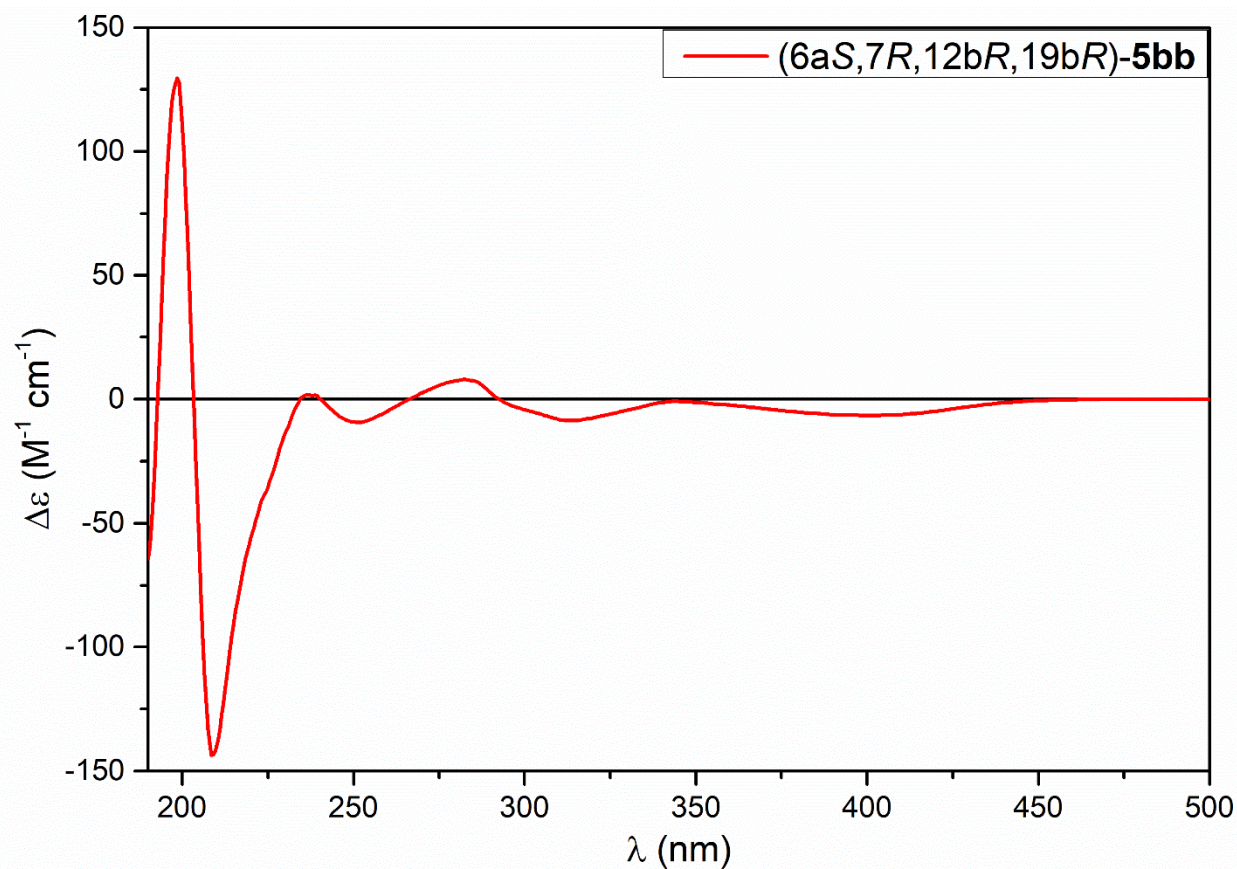

Figure S174. ECD spectrum of (6a*S*,7*R*,12*bR*,17*bR*)-**5bb** in MeCN.

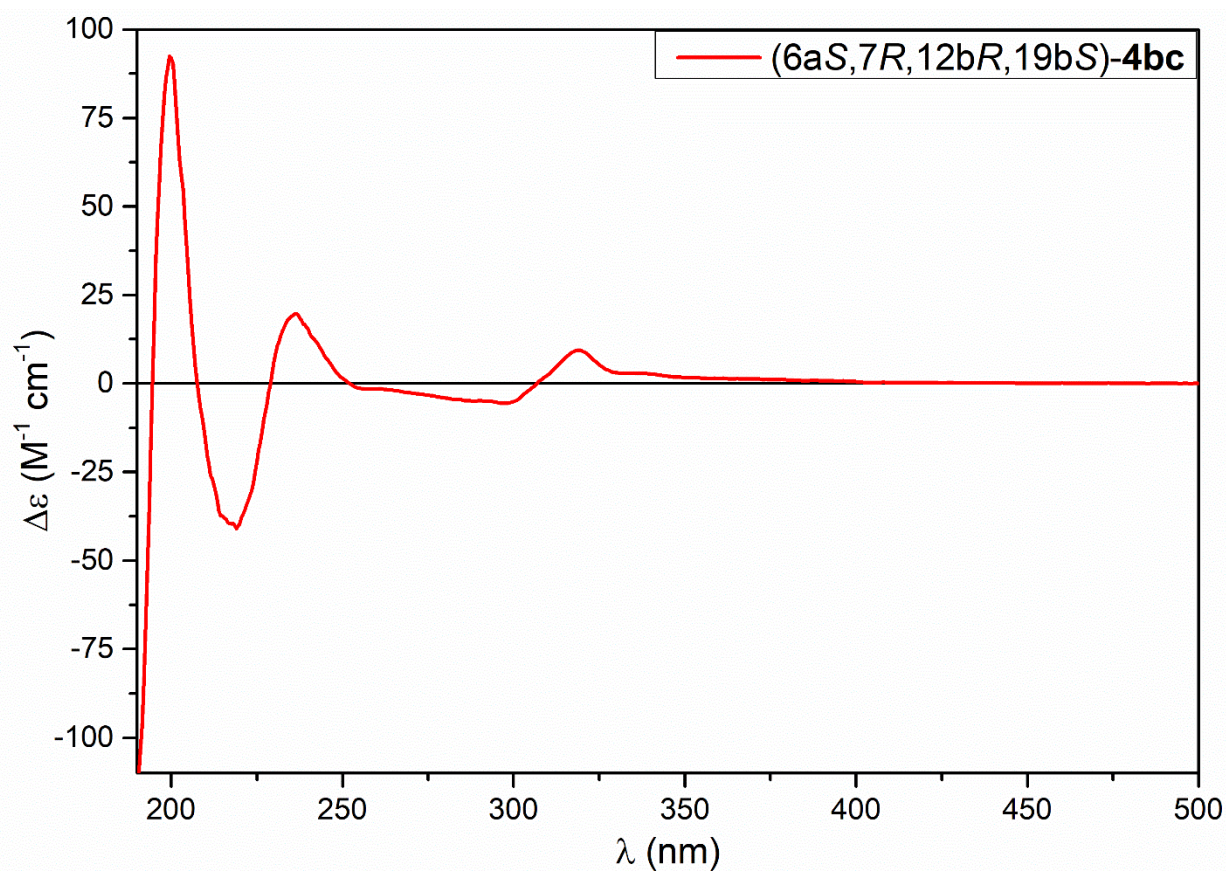

Figure S175. ECD spectrum of (6a*S*,7*R*,12*bR*,17*bS*)-**4bc** in MeCN.

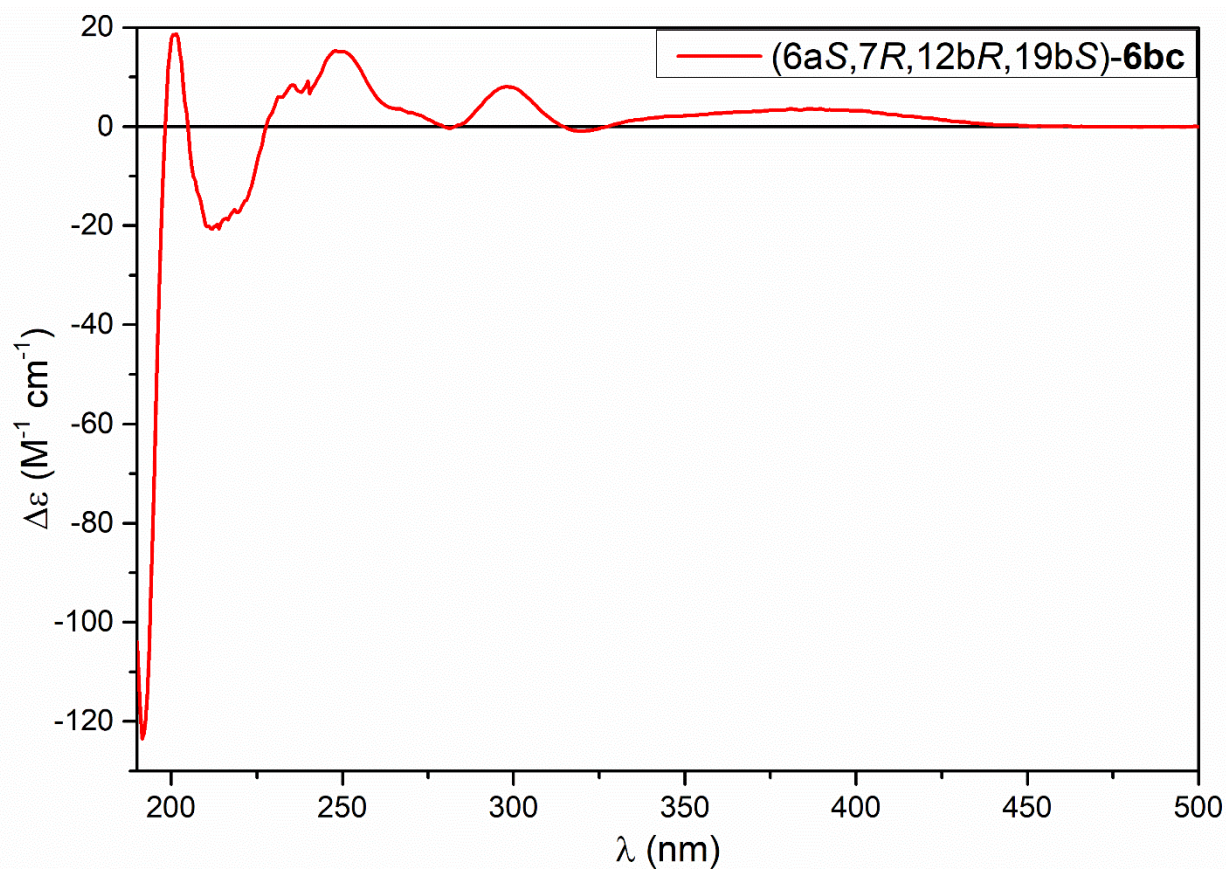

Figure S176. ECD spectrum of (6a*S*,7*R*,12*bR*,17*bS*)-**6bc** in MeCN.

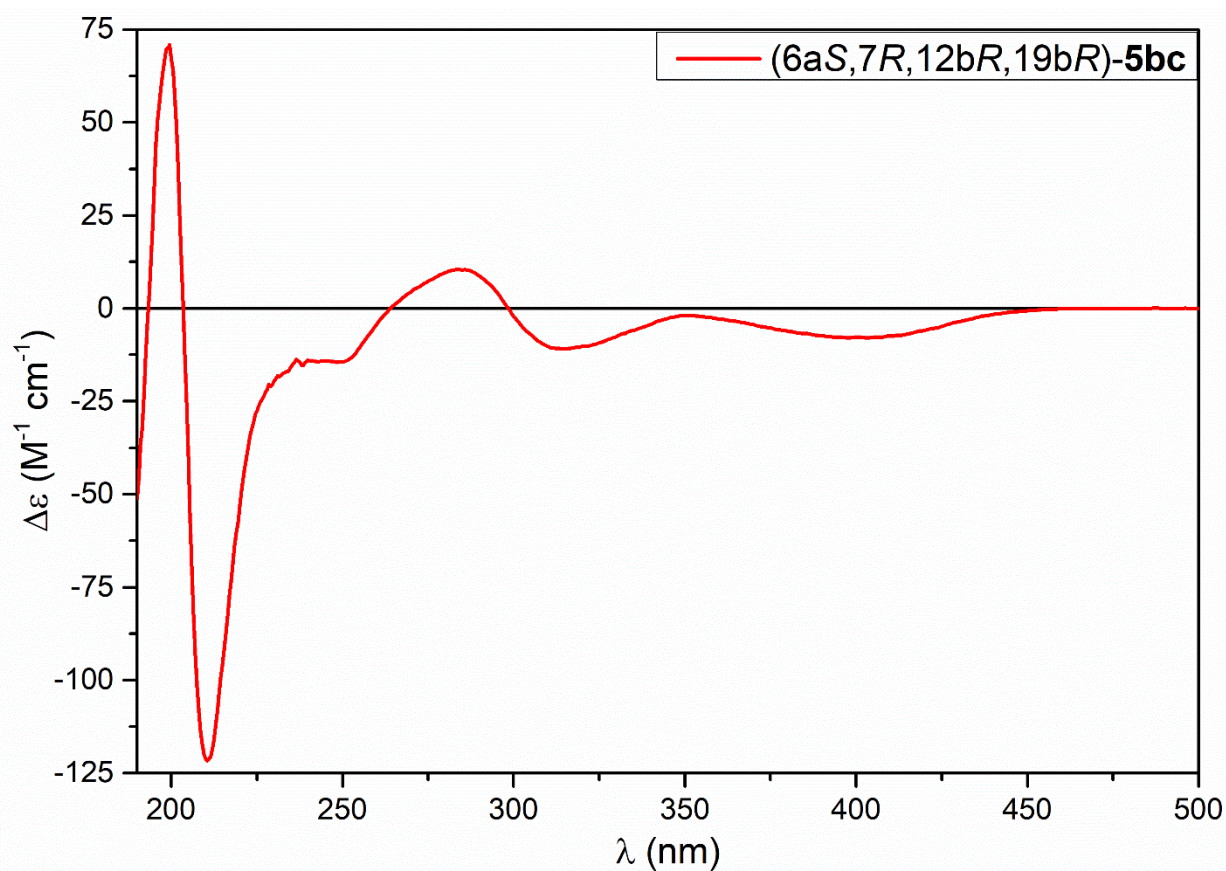

Figure S177. ECD spectrum of (6a*S*,7*R*,12*bR*,17*bR*)-**5bc** in MeCN.

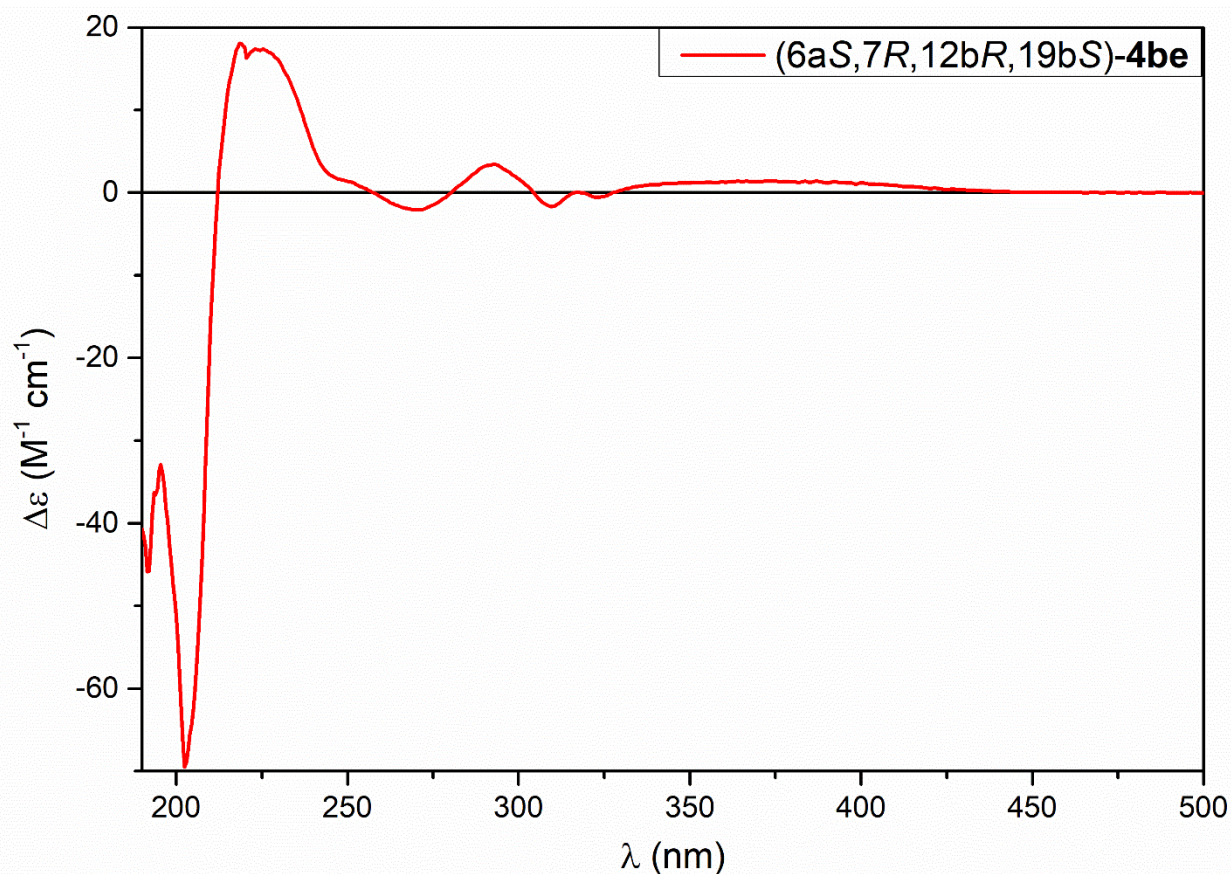

Figure S178. ECD spectrum of (6aS,7R,12bR,17bS)-4be in MeCN.

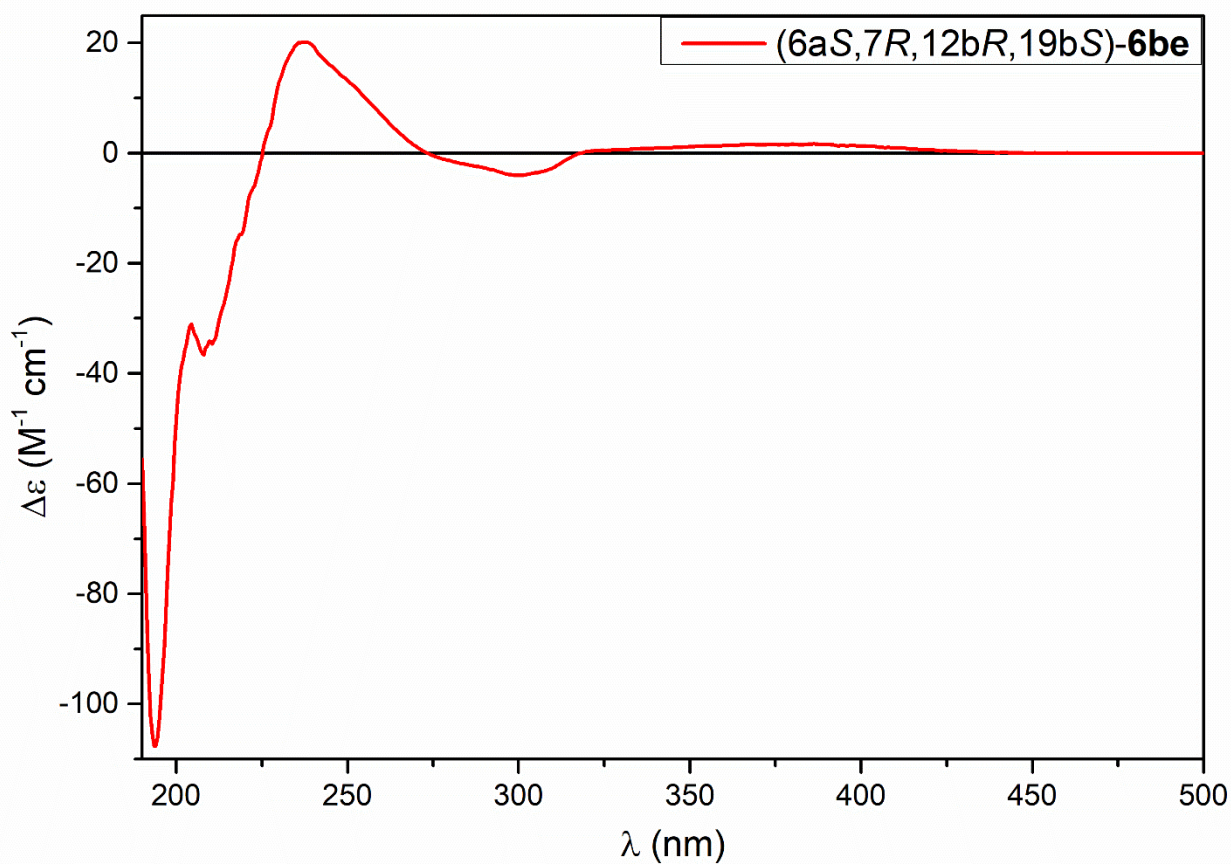

Figure S179. ECD spectrum of (6aS,7R,12bR,17bS)-6be in MeCN.

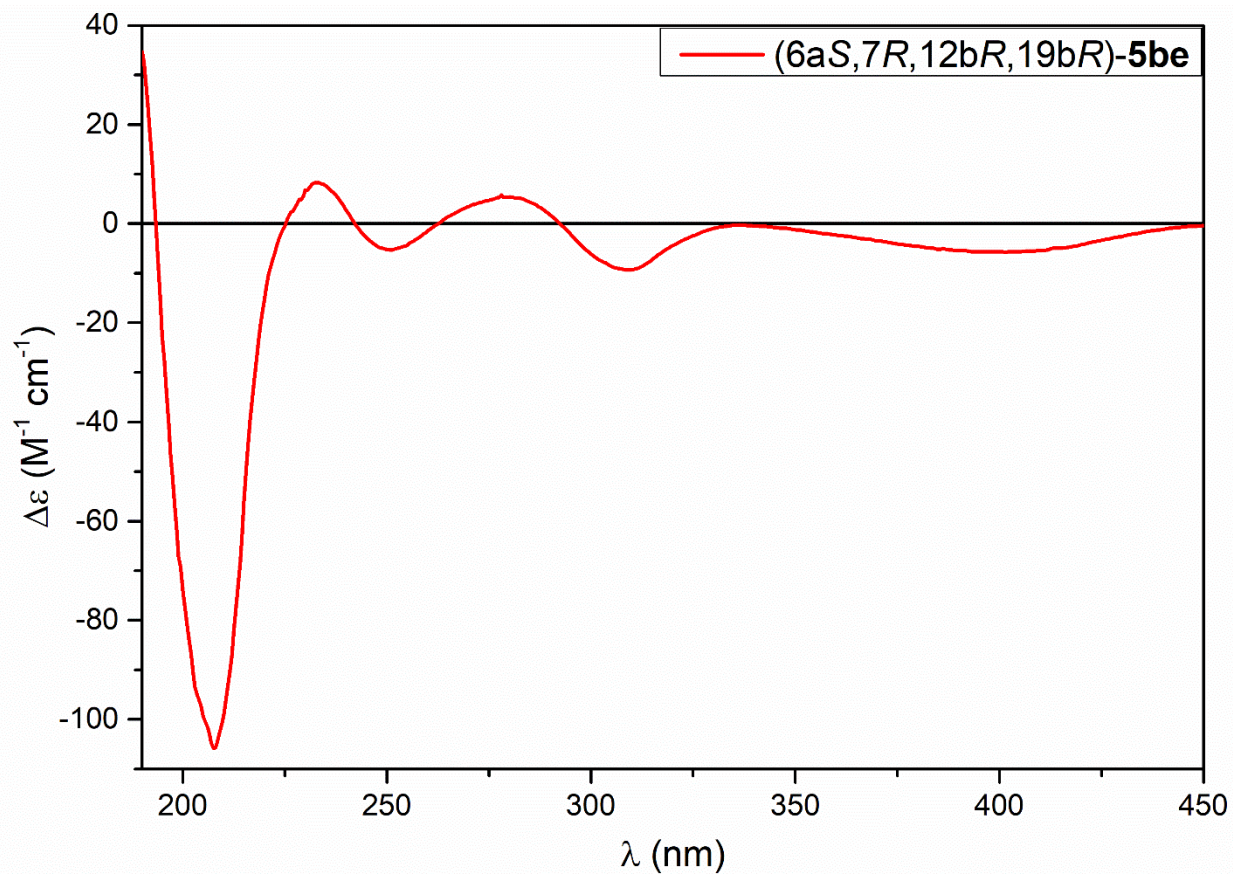

Figure S180. ECD spectrum of (6a*S*,7*R*,12*bR*,17*bR*)-**5be** in MeCN.

### 3.2.HPLC-ECD spectra of **4aa-ae**, **5aa-ae**, **6aa-ae** and **7aa-ae**

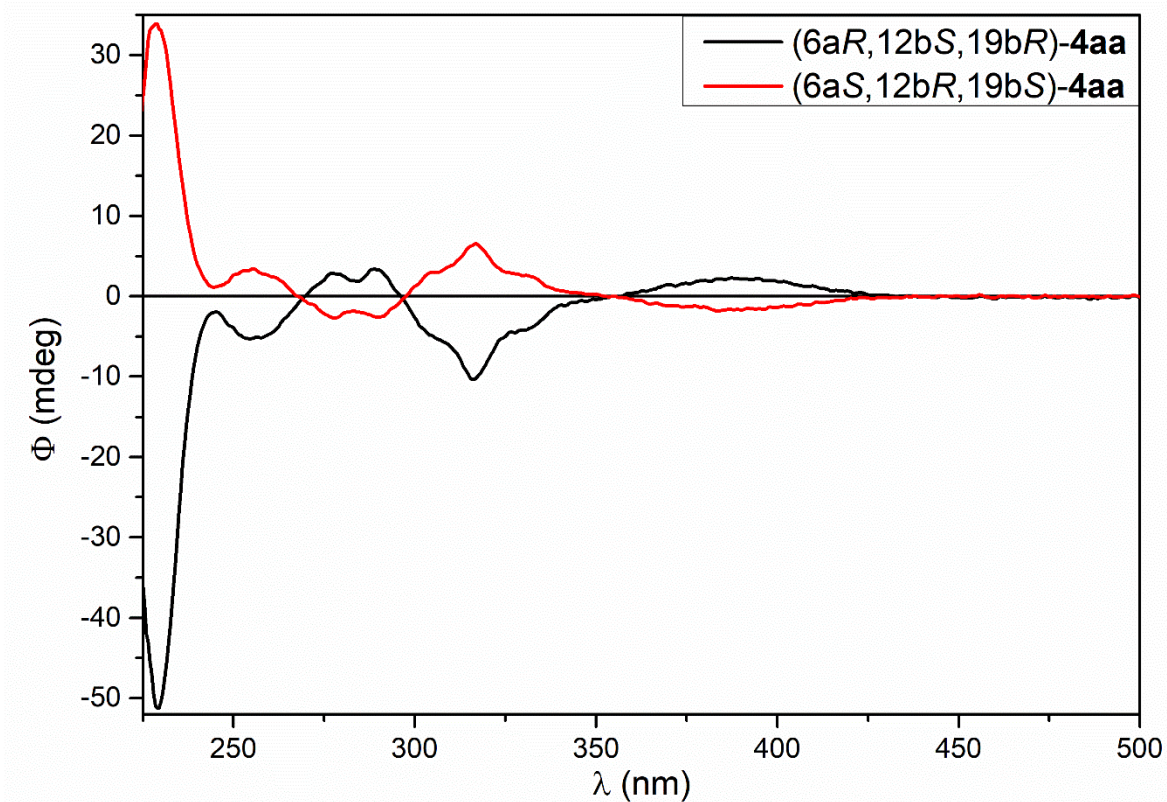

Figure S181. On-line HPLC-ECD spectra of (6aS,12bR,17bS)-**4aa** (red) and (6aR,12bS,17bR)-**4aa** (black) in hexane/dichloromethane/methanol 50:45:5.

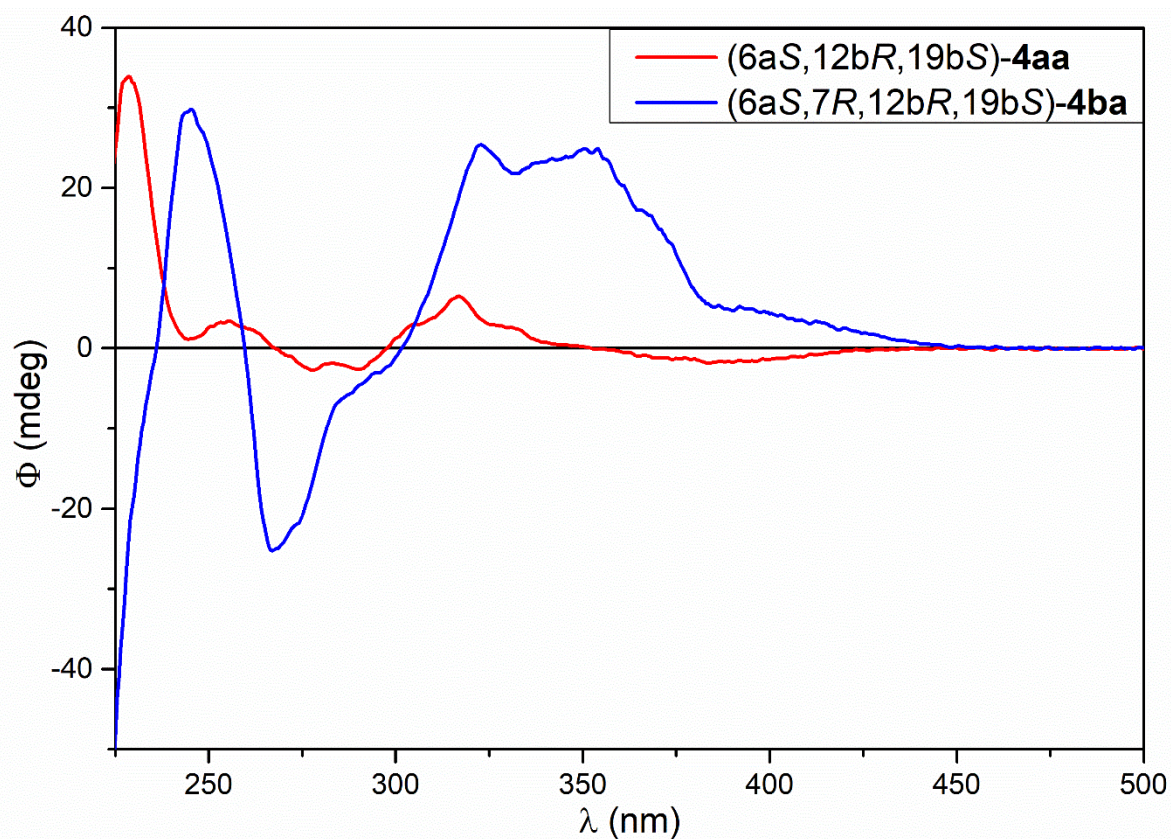

Figure S182. On-line HPLC-ECD spectrum of (6aS,12bR,17bS)-**4aa** (red) in hexane/dichloromethane/methanol 50:45:5 and ECD spectrum of (6aS,7R,12bR,17bS)-**4ba** (blue) in MeCN.

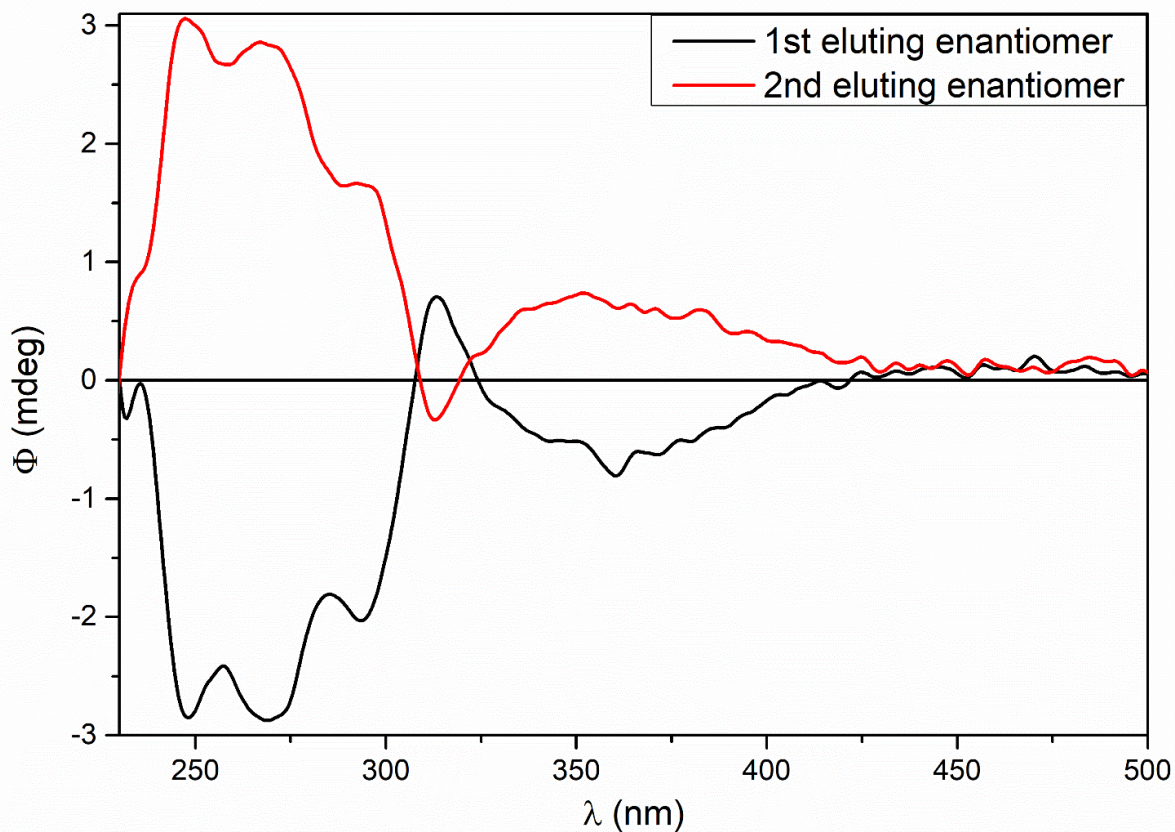

Figure S183. On-line HPLC-ECD spectra of first (black) and second (red) eluting enantiomer of *rac*-(6a*S*\*,12b*R*\*,17b*R*\*)-5aa in hexane/dichloromethane/methanol 30:63:7.

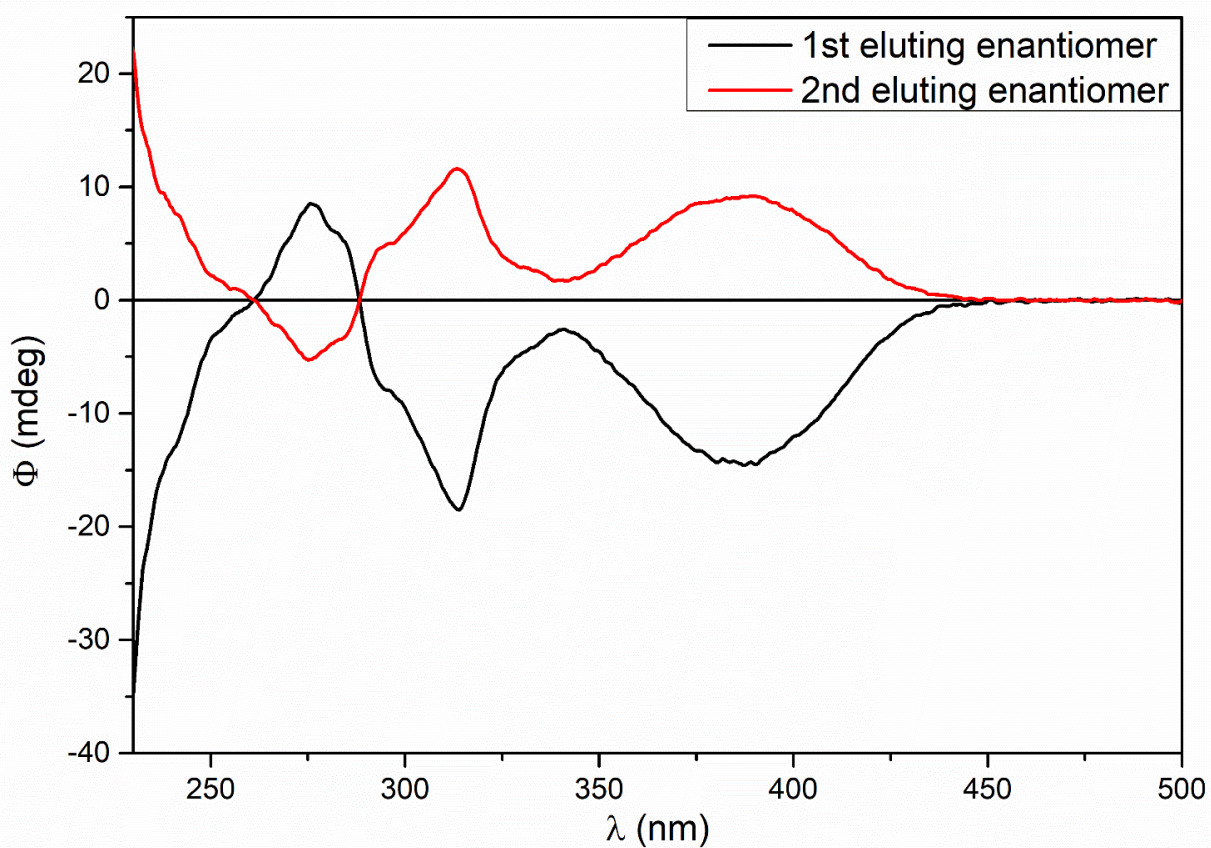

Figure S184. On-line HPLC-ECD spectra of first (black) and second (red) eluting enantiomer of *rac*-(6a*S*\*,12b*R*\*,17b*S*\*)-6aa in hexane/dichloromethane/methanol 30:63:7.

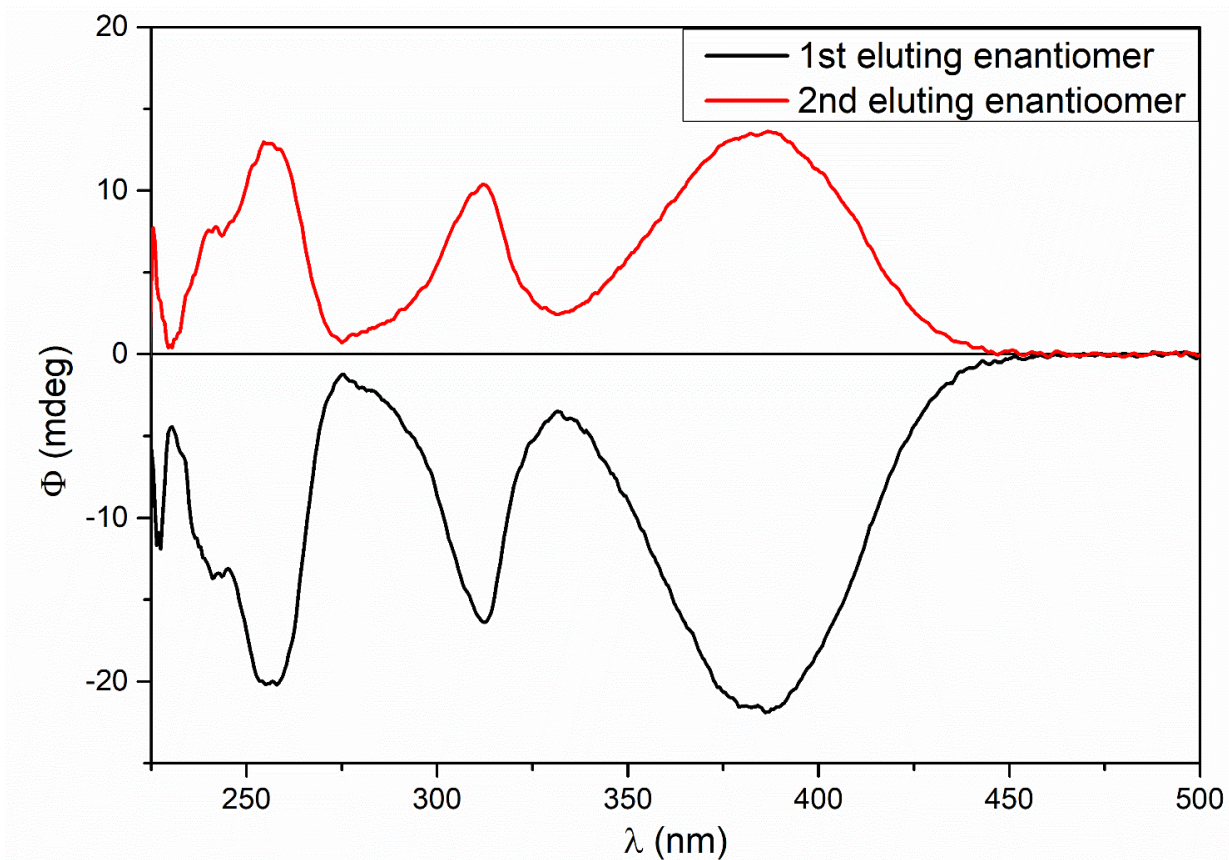

Figure S185. On-line HPLC-ECD spectra of first (black) and second (red) eluting enantiomer of *rac*-(6a*S*\*,12b*R*\*,17b*R*\*)-**7aa** in hexane/dichloromethane/methanol 30:63:7.

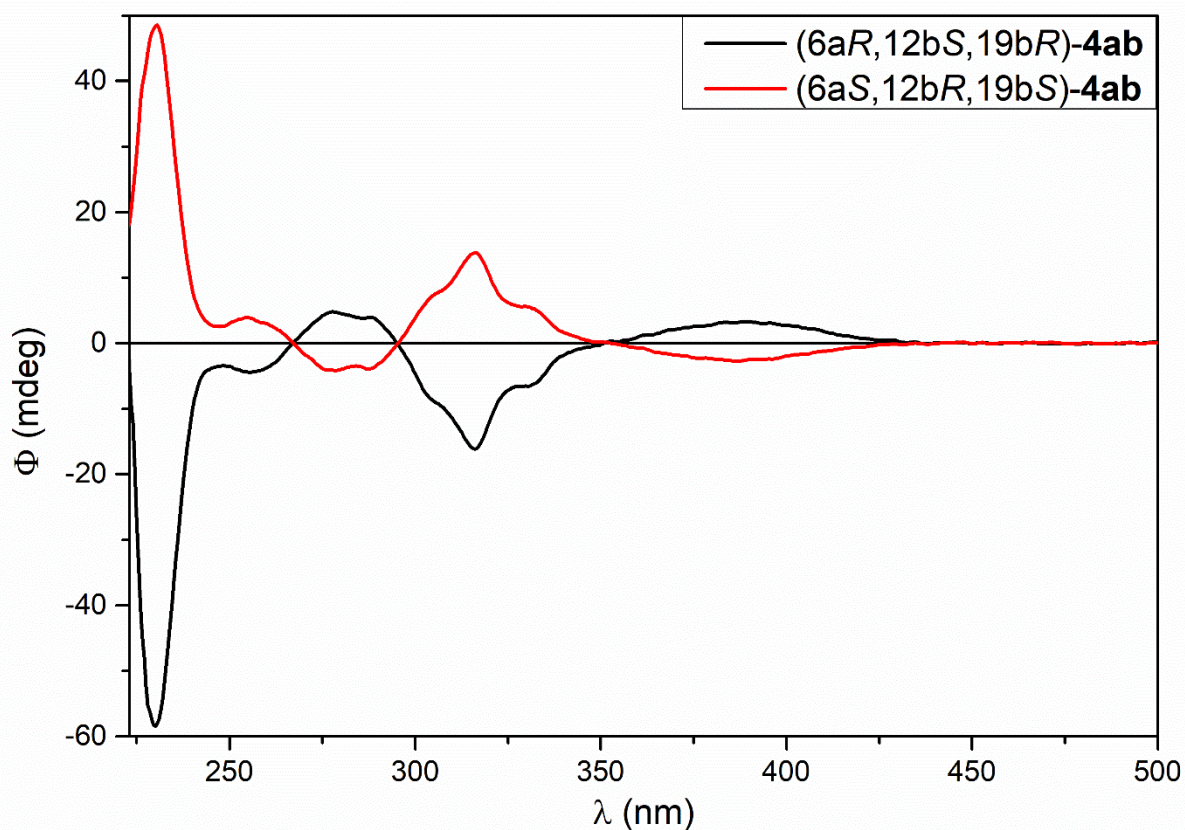

Figure S186. On-line HPLC-ECD spectra of (6a*S*,12b*R*,19b*S*)-**4ab** (red) and (6a*R*,12b*S*,19b*R*)-**4ab** (black) in hexane/dichloromethane/methanol 50:45:5.

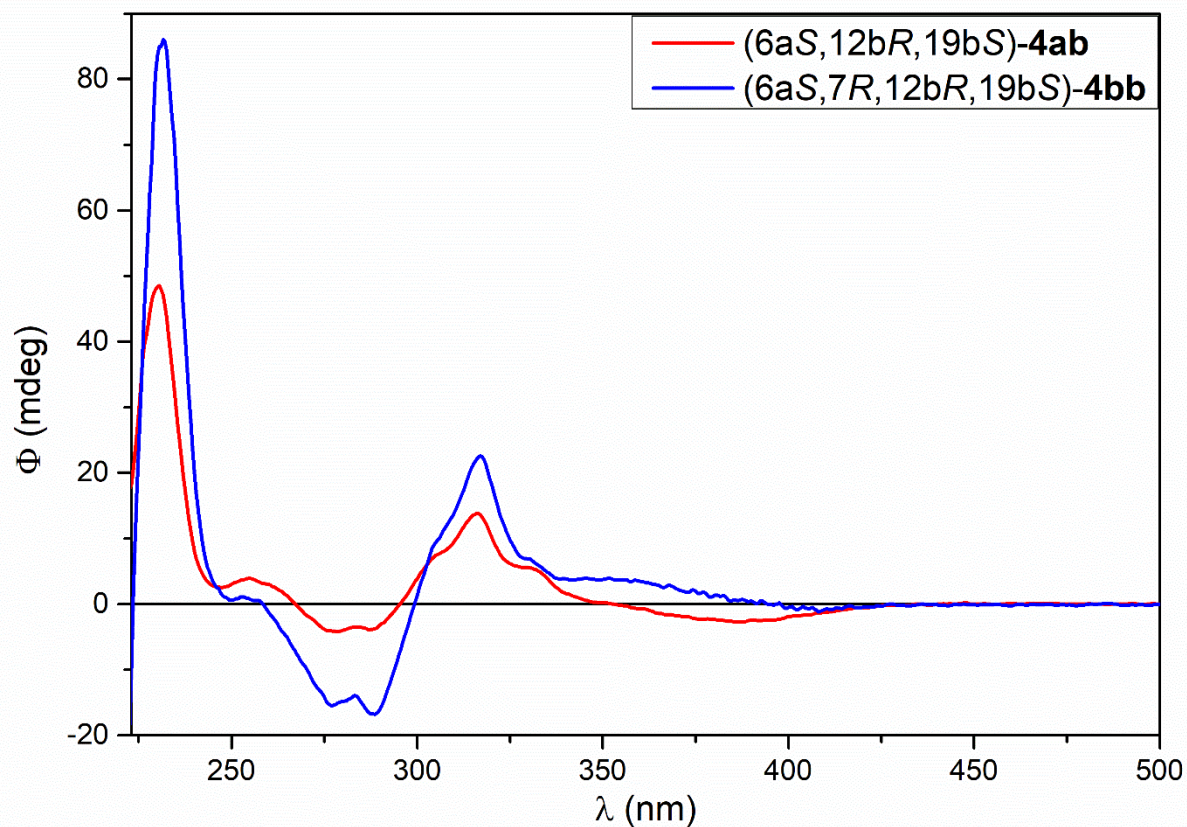

Figure S187. On-line HPLC-ECD spectrum of (6a*S*,12b*R*,17b*S*)-**4ab** (red) in hexane/dichloromethane/methanol 50:45:5 and ECD spectrum of (6a*S*,7*R*,12b*R*,17b*S*)-**4bb** (blue) in MeCN.

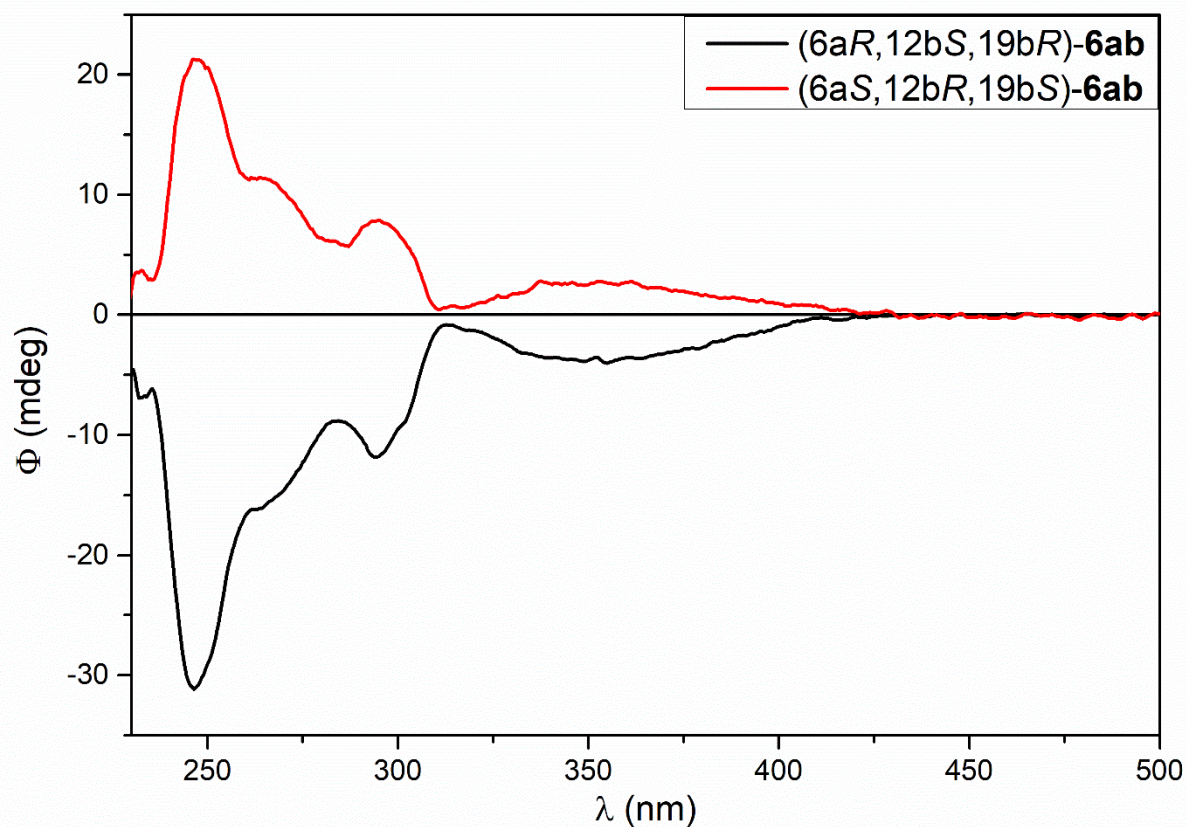

Figure S188. On-line HPLC-ECD spectra of (6a*S*,12b*R*,17b*S*)-**6ab** (red) and (6a*R*,12b*S*,17b*R*)-**6ab** (black) in hexane/dichloromethane/methanol 50:45:5.

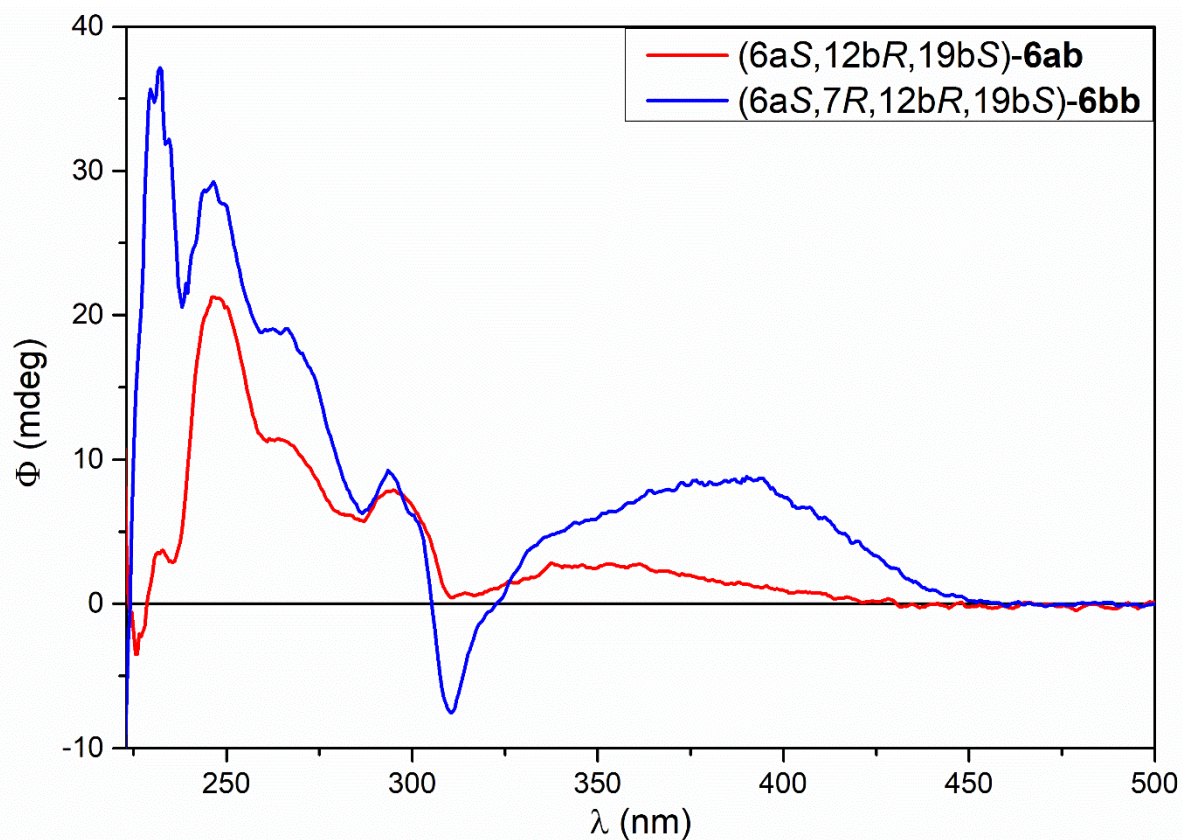

Figure S189. On-line HPLC-ECD spectrum of (6a*S*,12b*R*,17b*S*)-**6ab** (red) in hexane/dichloromethane/methanol 50:45:5 and ECD spectrum of (6a*S*,7*R*,12b*R*,17b*S*)-**6bb** (blue) in MeCN.

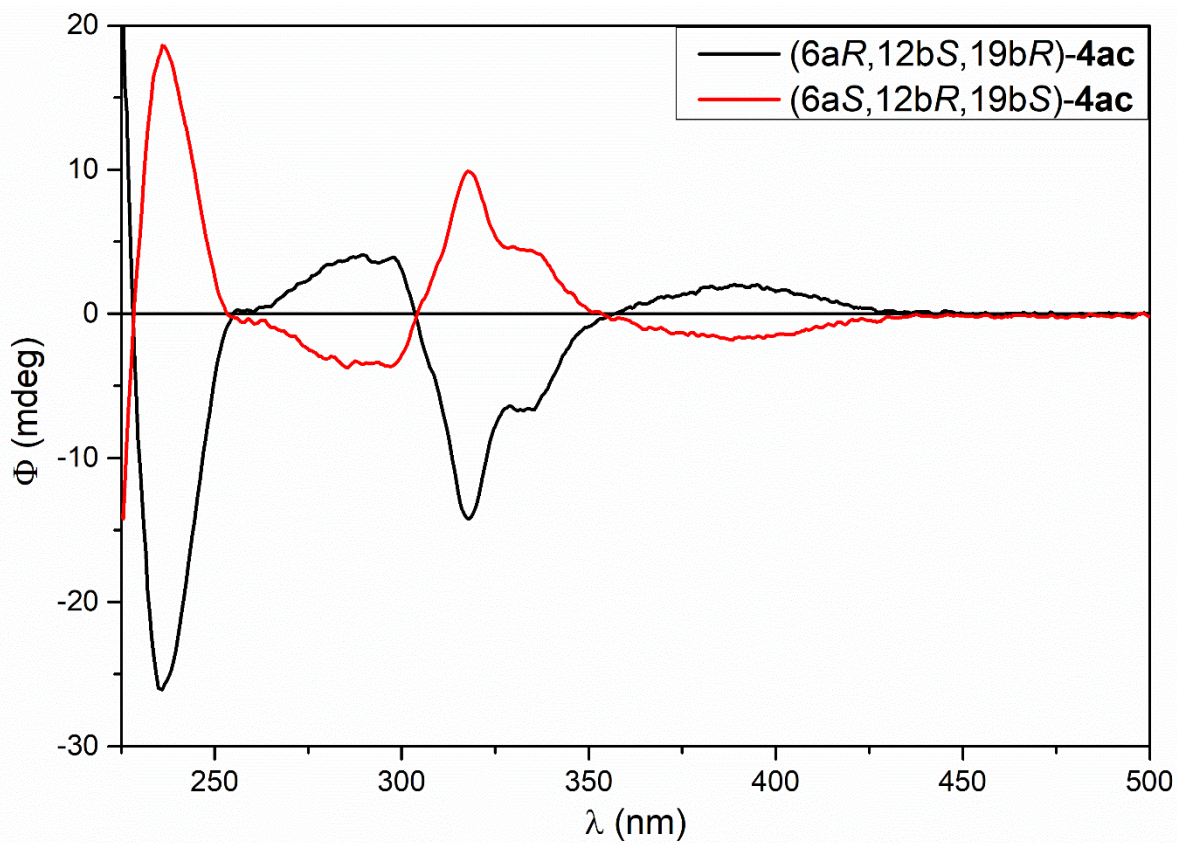

Figure S190. On-line HPLC-ECD spectra of (6a*S*,12b*R*,17b*S*)-**4ac** (red) and (6a*R*,12b*S*,17b*R*)-**4ac** (black) in hexane/dichloromethane/methanol 50:45:5.

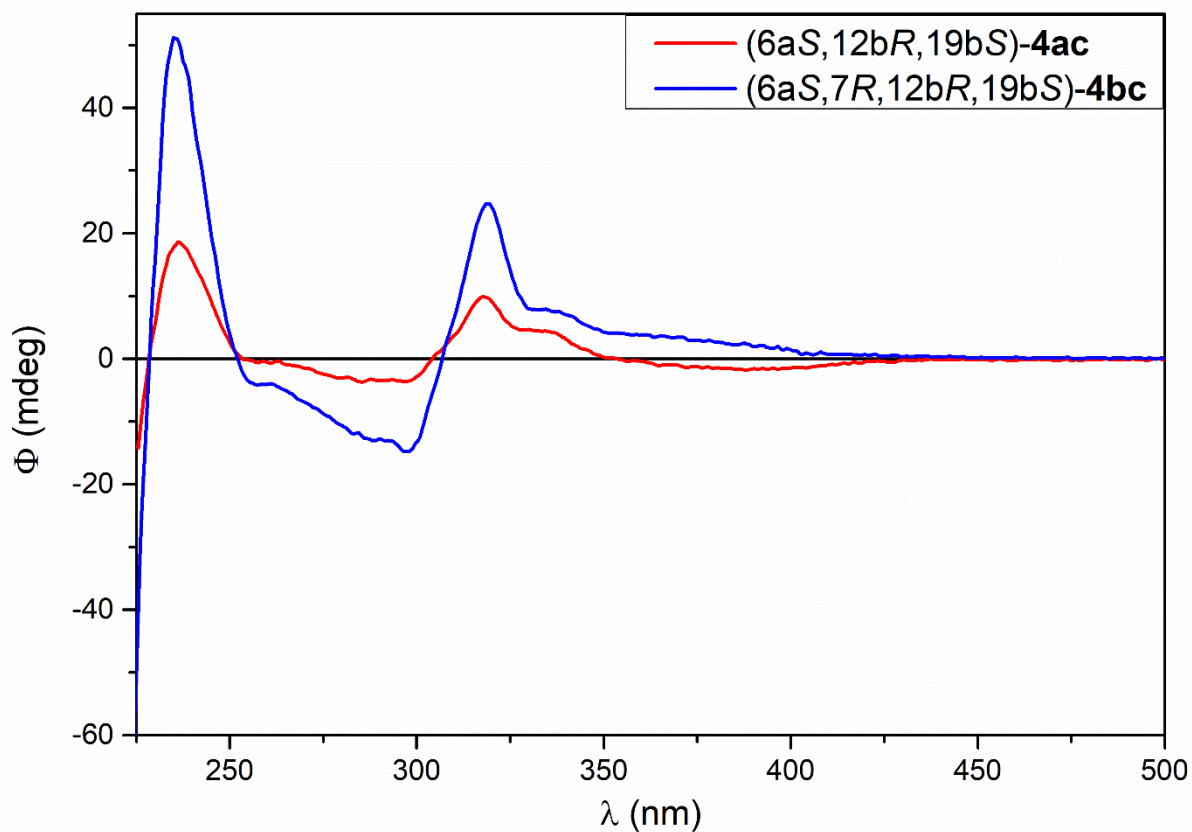

Figure S191. On-line HPLC-ECD spectrum of (6a*S*,12b*R*,17b*S*)-**4ac** (red) in hexane/dichloromethane/methanol 50:45:5 and ECD spectrum of (6a*S*,7*R*,12b*R*,17b*S*)-**4bc** (blue) in MeCN.

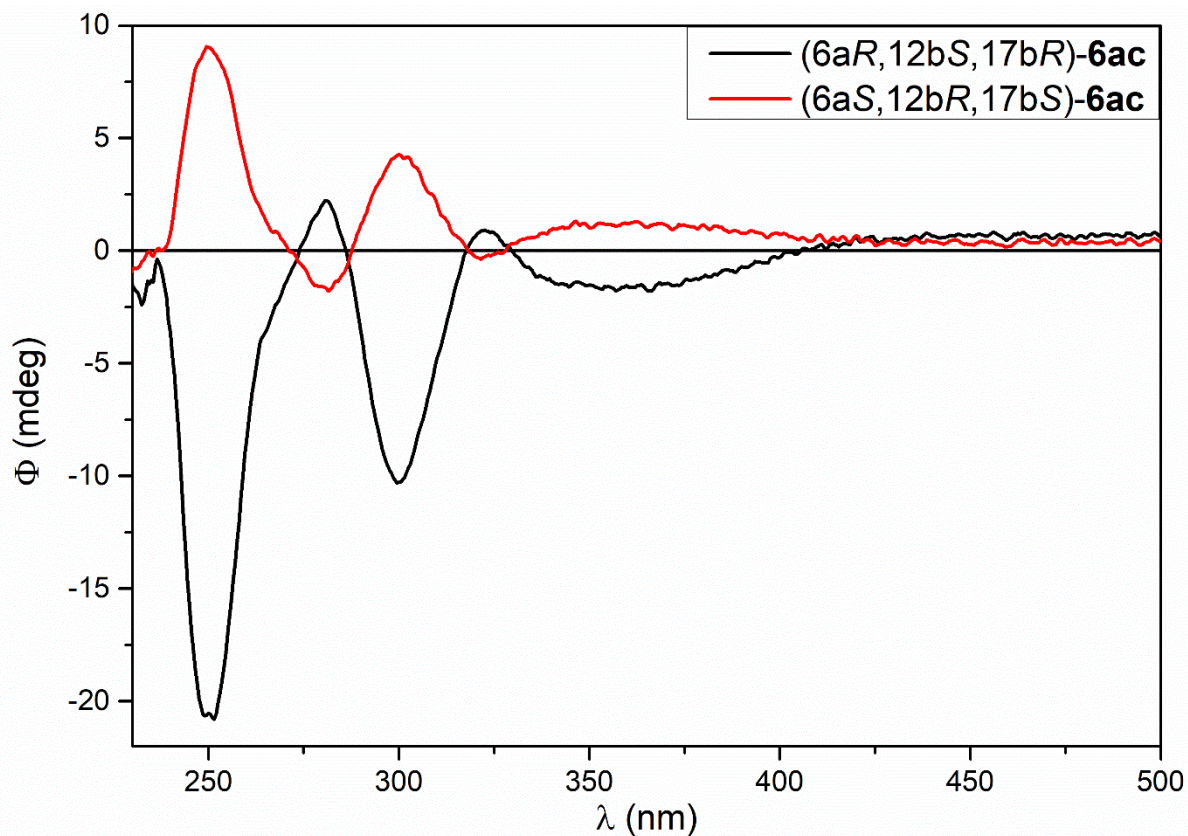

Figure S192. On-line HPLC-ECD spectra of (6a*S*,12b*R*,17b*S*)-**6ac** (red) and (6a*R*,12b*S*,17b*R*)-**6ac** (black) in hexane/dichloromethane/methanol 50:45:5.

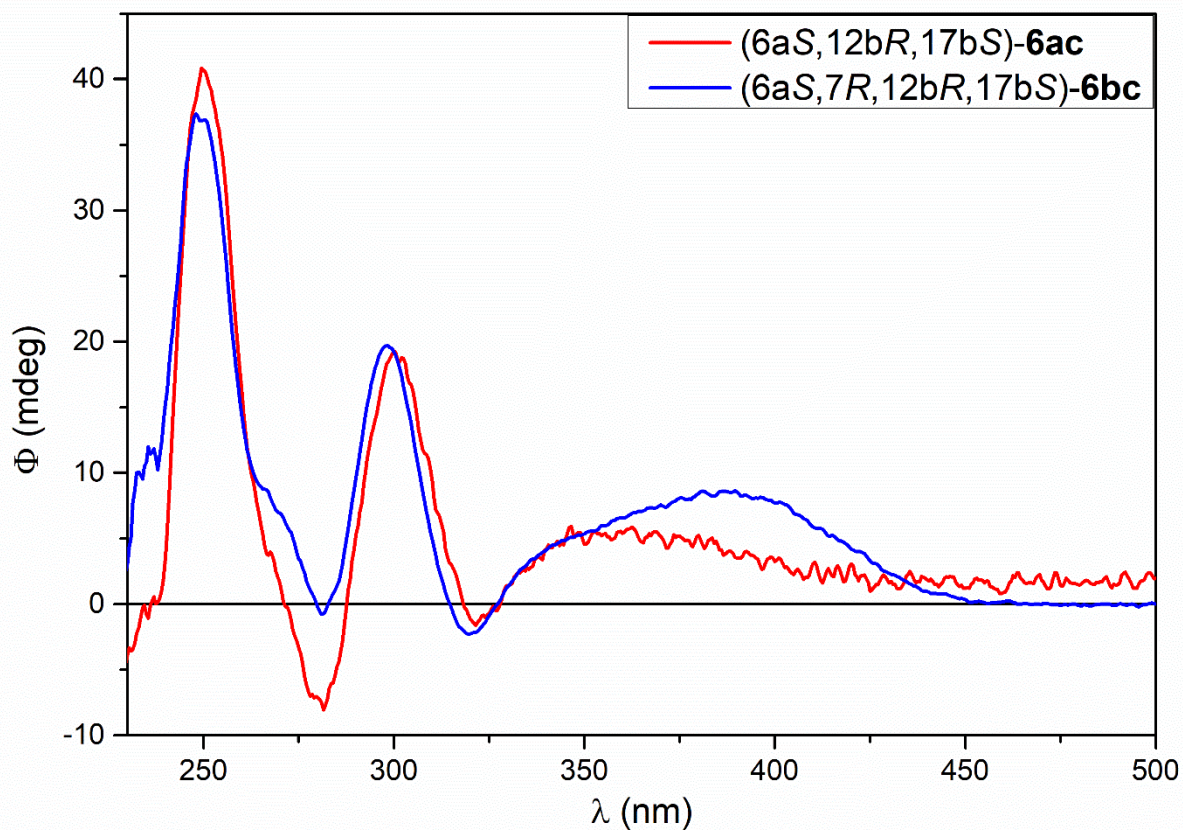

Figure S193. On-line HPLC-ECD spectrum of (6a*S*,12b*R*,17b*S*)-**6ac** (red) in hexane/dichloromethane/methanol 50:45:5 and ECD spectrum of (6a*S*,7*R*,12b*R*,17b*S*)-**6bc** (blue) in MeCN.

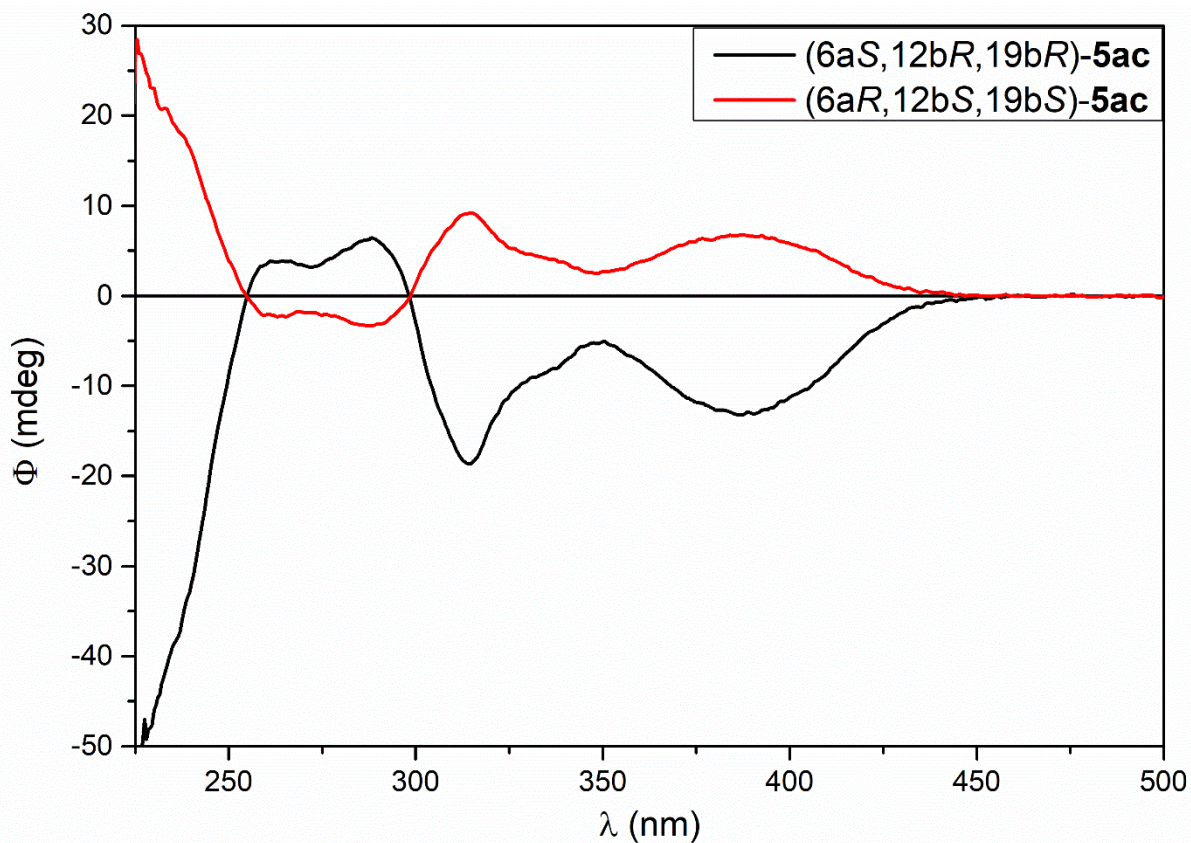

Figure S194. On-line HPLC-ECD spectra of (6a*S*,12b*R*,19b*R*)-**5ac** (black) and (6a*R*,12b*S*,19b*S*)-**5ac** (red) in hexane/dichloromethane/methanol 30:63:7.

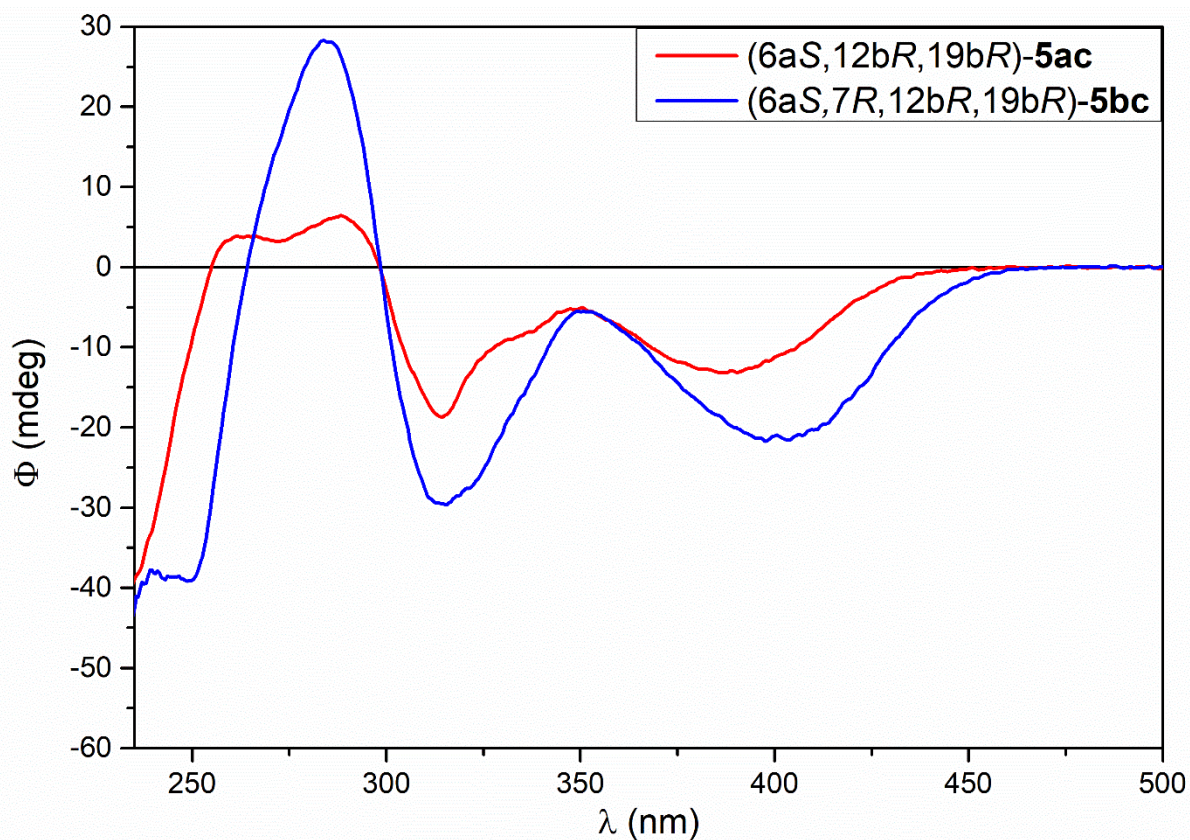

Figure S195. On-line HPLC-ECD spectrum of (6a*S*,12b*R*,17b*R*)-**5ac** (red) in hexane/dichloromethane/methanol 30:63:7 and ECD spectrum of (6a*S*,7*R*,12b*R*,17b*R*)-**5bc** (blue) in MeCN.

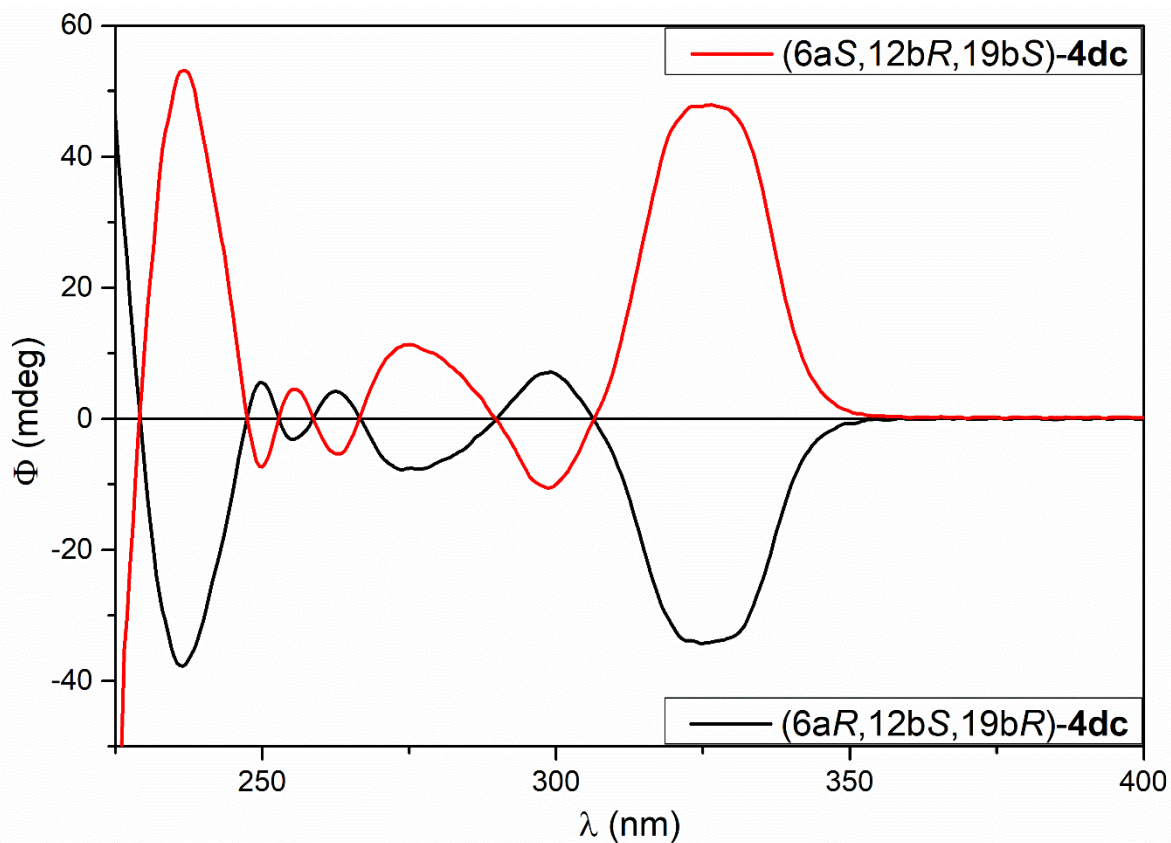

Figure S196. On-line HPLC-ECD spectra of (6a*S*,12b*R*,17b*S*)-**4dc** (red) and (6a*R*,12b*S*,17b*R*)-**4dc** (black) in hexane/dichloromethane/methanol 70:27:3.

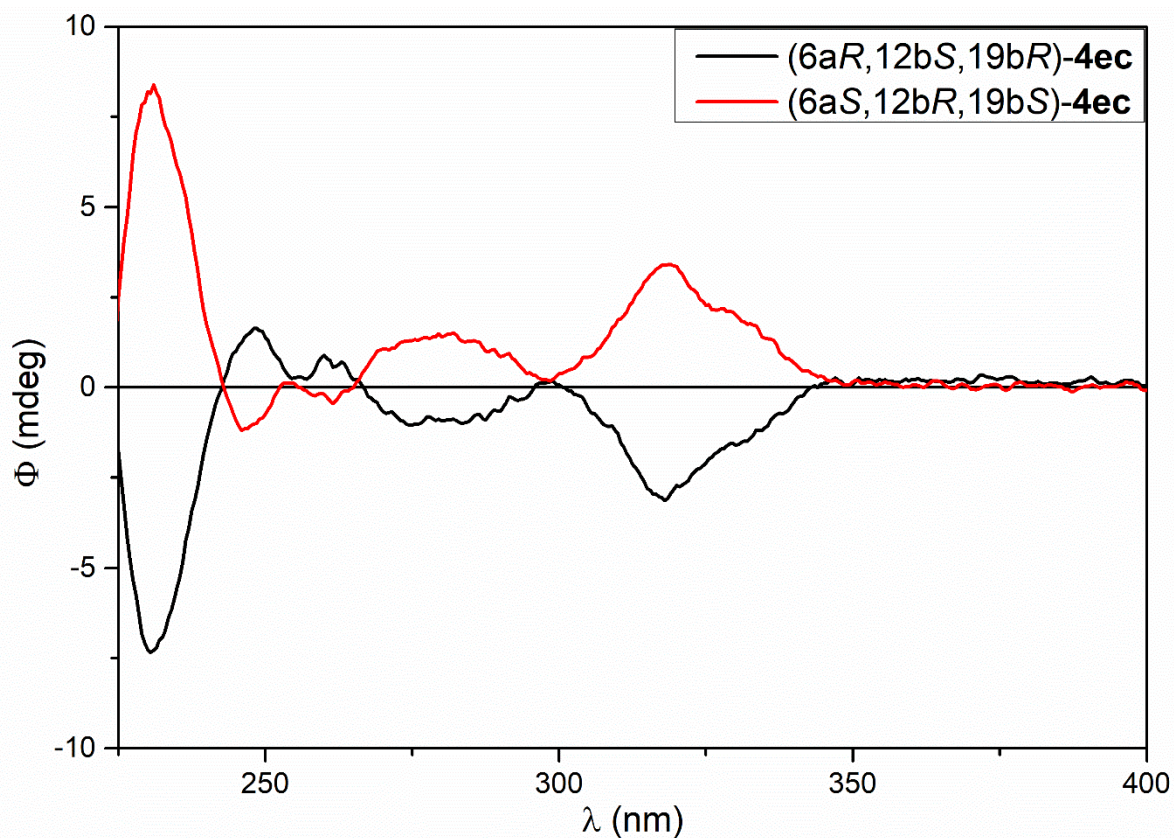

Figure S197. On-line HPLC-ECD spectra of (6a*S*,12b*R*,17b*S*)-**4ec** (red) and (6a*R*,12b*S*,17b*R*)-**4ec** (black) in hexane/dichloromethane/methanol 80:18:2.

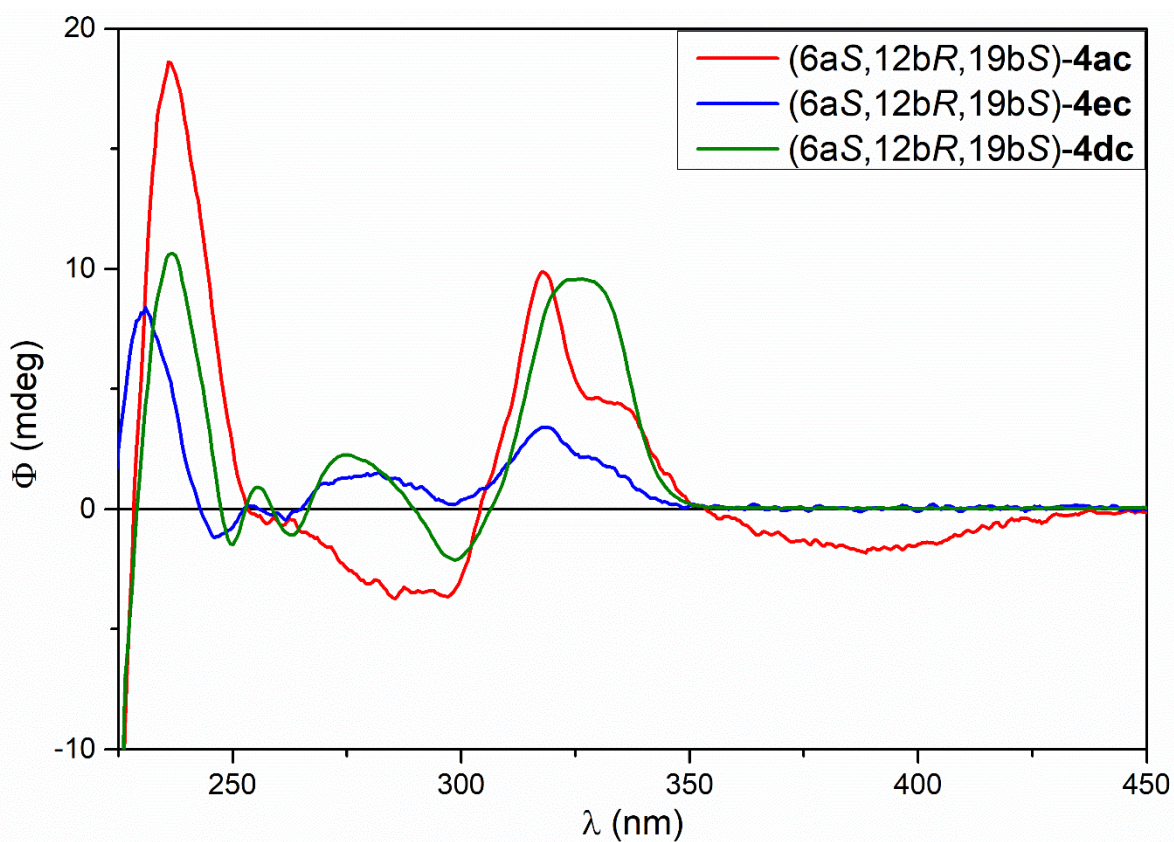

Figure S198. On-line HPLC-ECD spectra of (6a*S*,12b*R*,17b*S*)-**4ac** (red), (6a*R*,12b*S*,17b*R*)-**4ec** (blue) and (6a*R*,12b*S*,17b*R*)-**4dc** (green) (multiplied by 0.2).

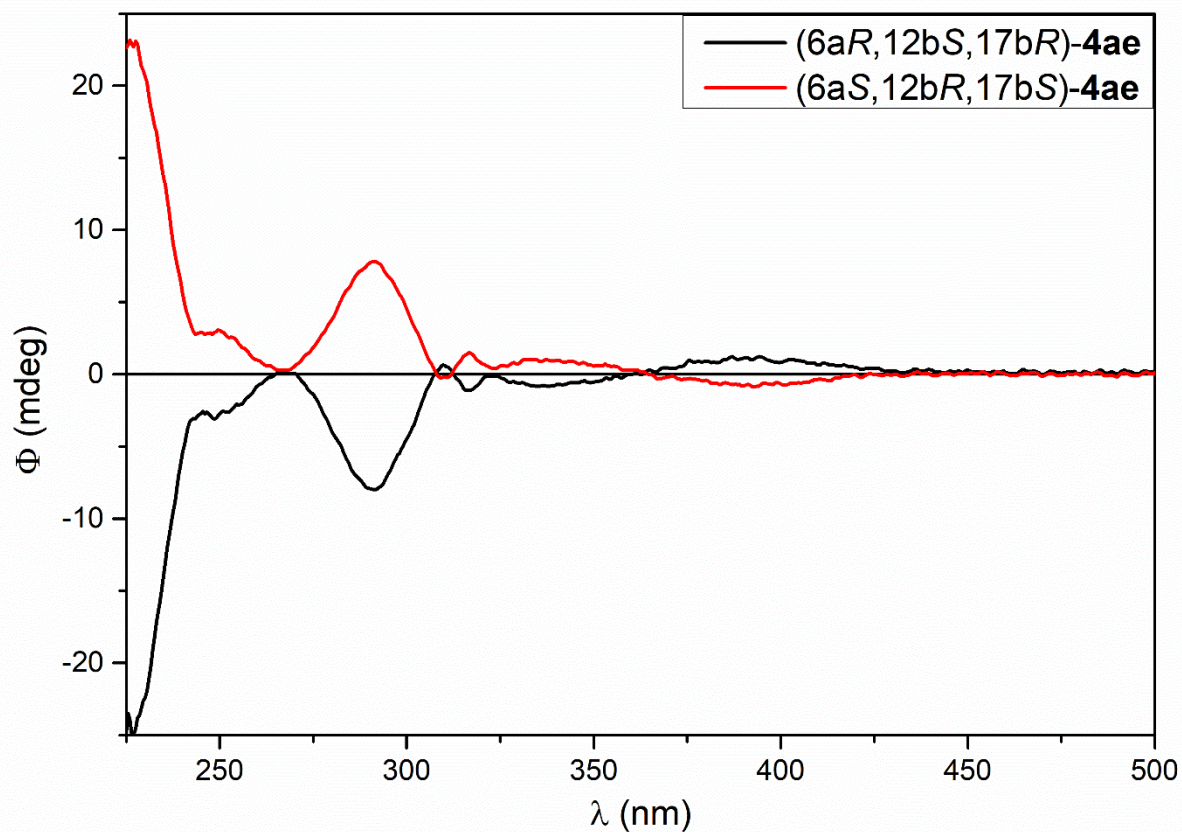

Figure S199. On-line HPLC-ECD spectra of (6a*S*,12b*R*,17b*S*)-**4ae** (black) and (6a*R*,12b*S*,17b*R*)-**4ae** (red) in hexane/dichloromethane/methanol 50:45:5.

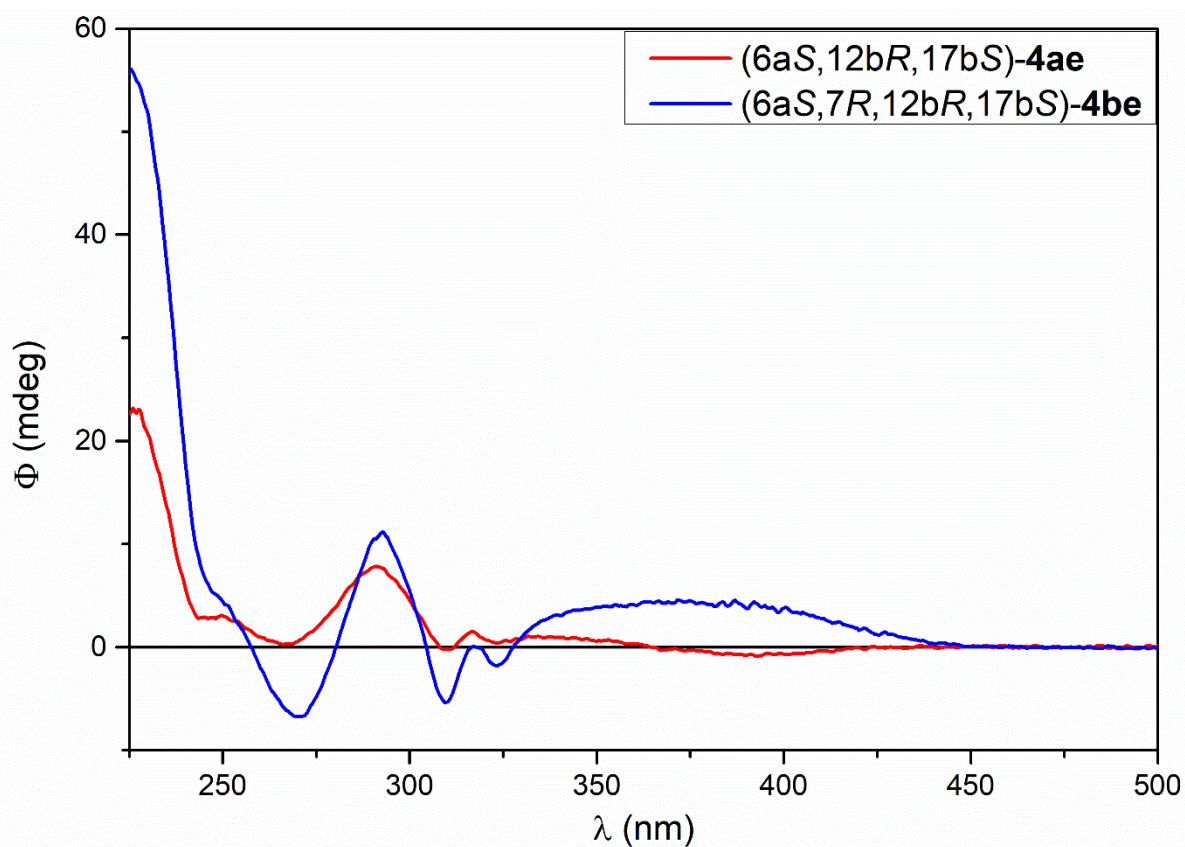

Figure S200. On-line HPLC-ECD spectrum of (6a*S*,12b*R*,17b*S*)-**4ae** (red) in hexane/dichloromethane/methanol 50:45:5 and ECD spectrum of (6a*S*,7*R*,12b*R*,17b*S*)-**4be** (blue) in MeCN.

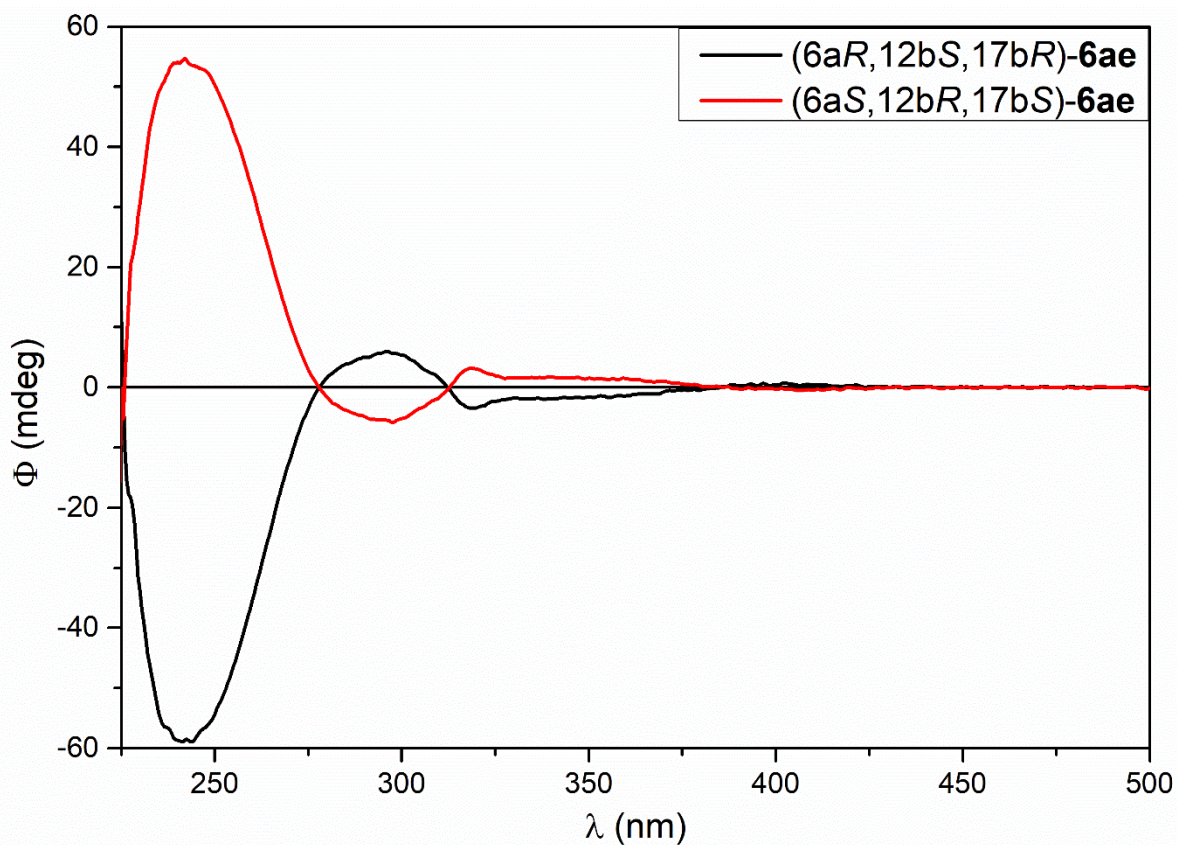

Figure S201. On-line HPLC-ECD spectra of (6a*S*,12b*R*,17b*S*)-**6ae** (red) and (6a*R*,12b*S*,17b*R*)-**6ae** (black) in hexane/dichloromethane/methanol 30:63:7.

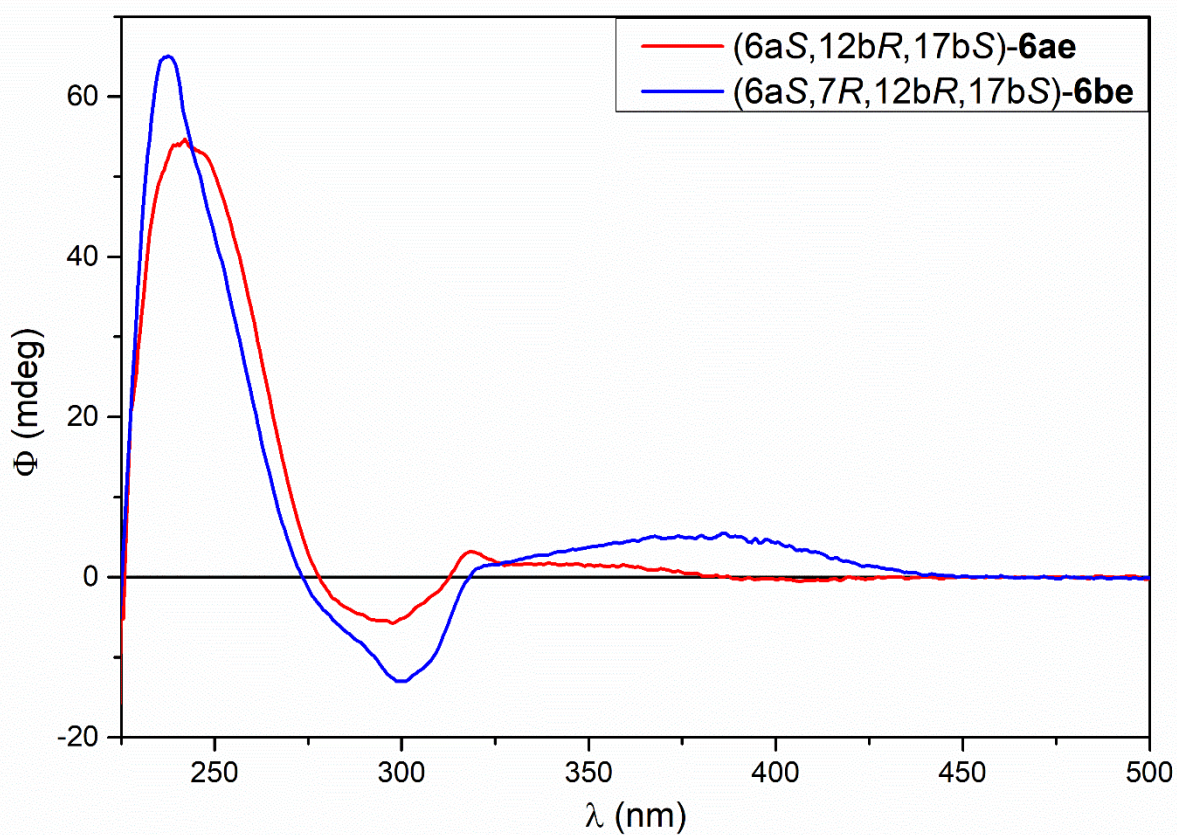

Figure S202. On-line HPLC-ECD spectrum of (6a*S*,12b*R*,17b*S*)-**6ae** (red) in hexane/dichloromethane/methanol 30:63:7 and ECD spectrum of (6a*S*,7*R*,12b*R*,17b*S*)-**6be** (blue) in MeCN.

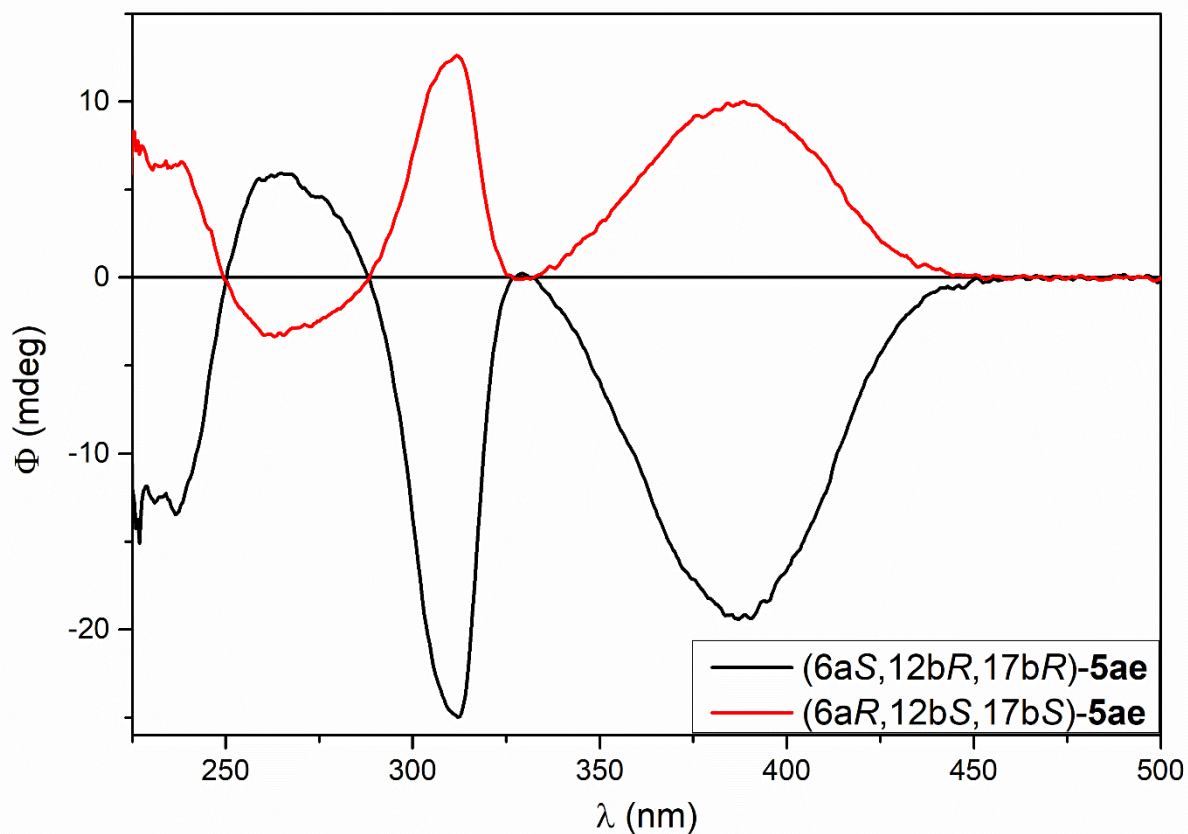

Figure S203. On-line HPLC-ECD spectra of (6a*S*,12b*R*,17b*R*)-**5ae** (black) and (6a*R*,12b*S*,17b*S*)-**5ae** (red) in hexane/dichloromethane/methanol 30:63:7.

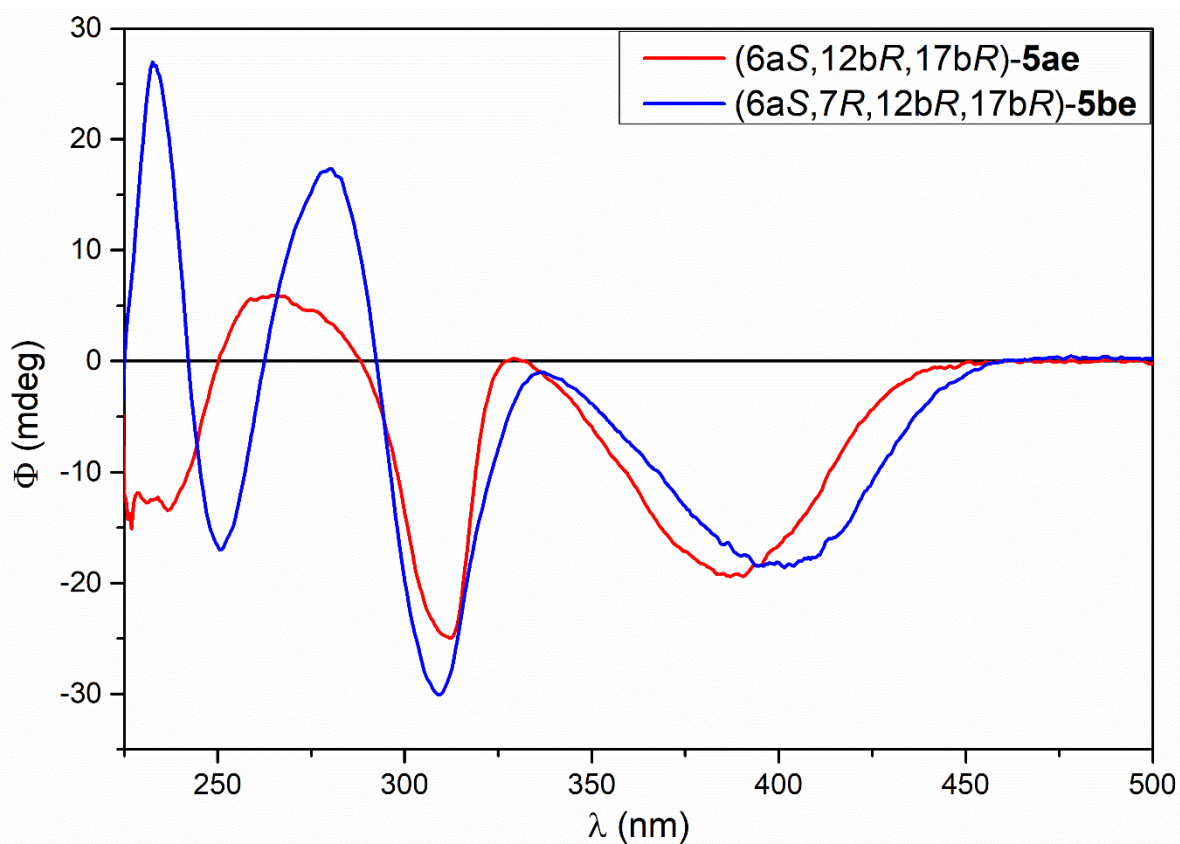

Figure S204. On-line HPLC-ECD spectrum of (6a*S*,12b*R*,17b*R*)-**5ae** (red) in hexane/dichloromethane/methanol 30:63:7 and ECD spectrum of (6a*S*,7*R*,12b*R*,17b*R*)-**5be** (blue) in MeCN.

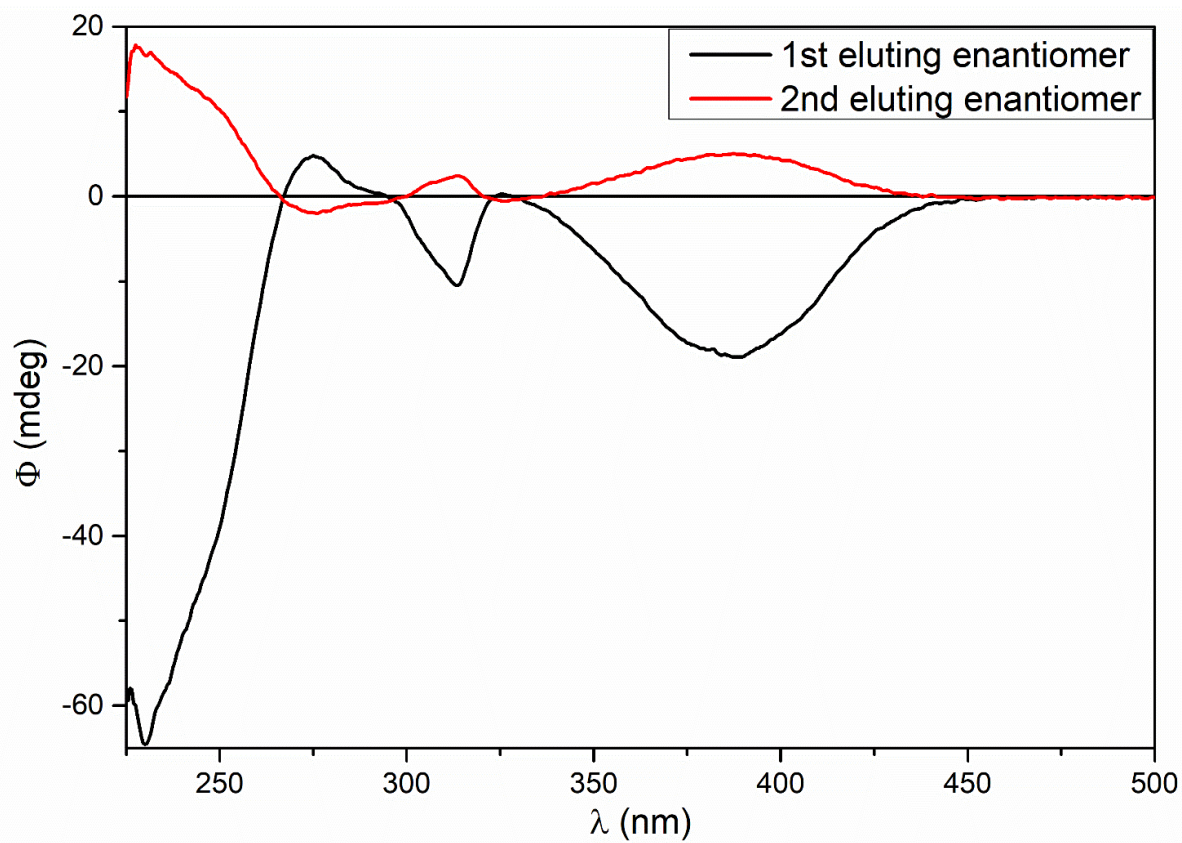

Figure S205. On-line HPLC-ECD spectra of first (black) and second (red) eluting enantiomer of *rac*-(6a*S*\*,12b*R*\*,17b*R*\*)-7ae in hexane/dichloromethane/methanol 30:63:7.

#### 4. *In vitro* antiproliferative activity of the products of the domino reactions against A2780 and WM35 human cancer cell lines

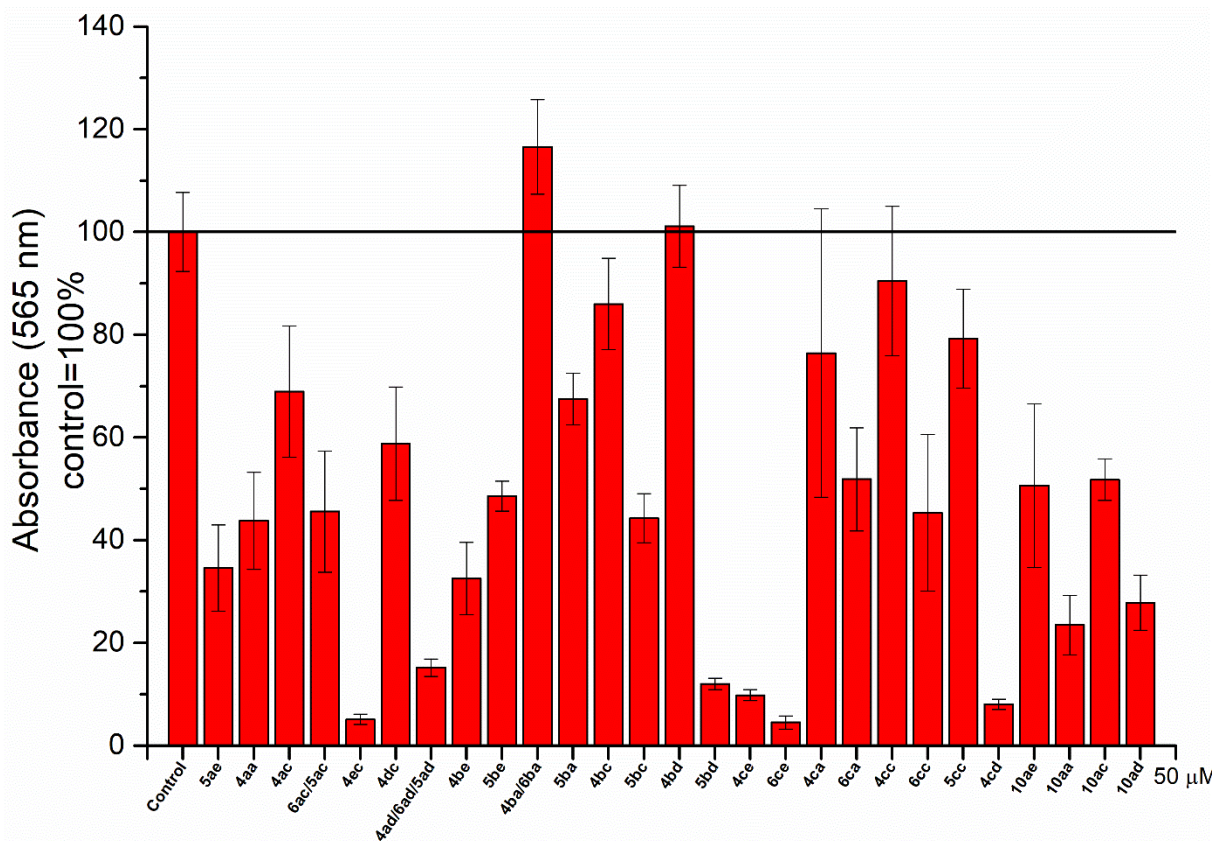

Figure S206. Effect of **4aa-10ad** (50  $\mu$ M) on the viable cell number of A2780 ovarian carcinoma cell line.

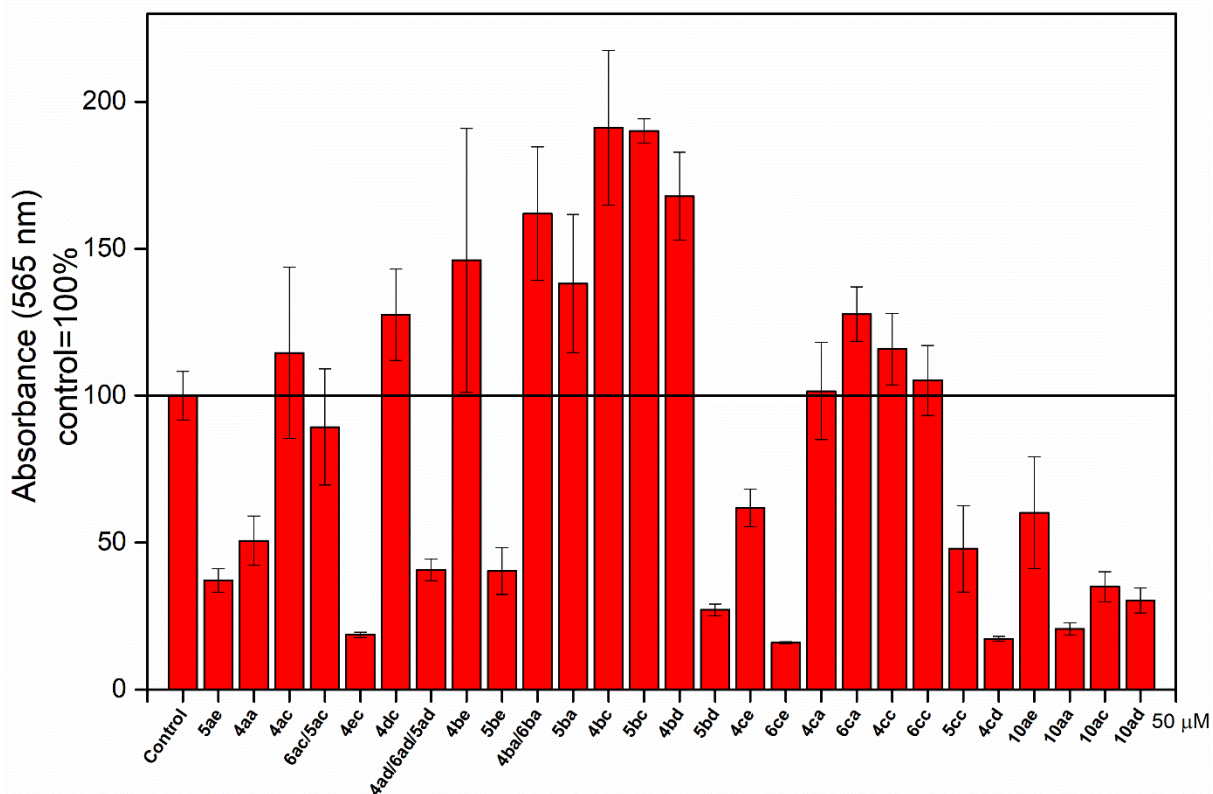

Figure S207. Effect of **4aa-10ad** (50  $\mu$ M) on the viable cell number of WM35 melanoma cell line.

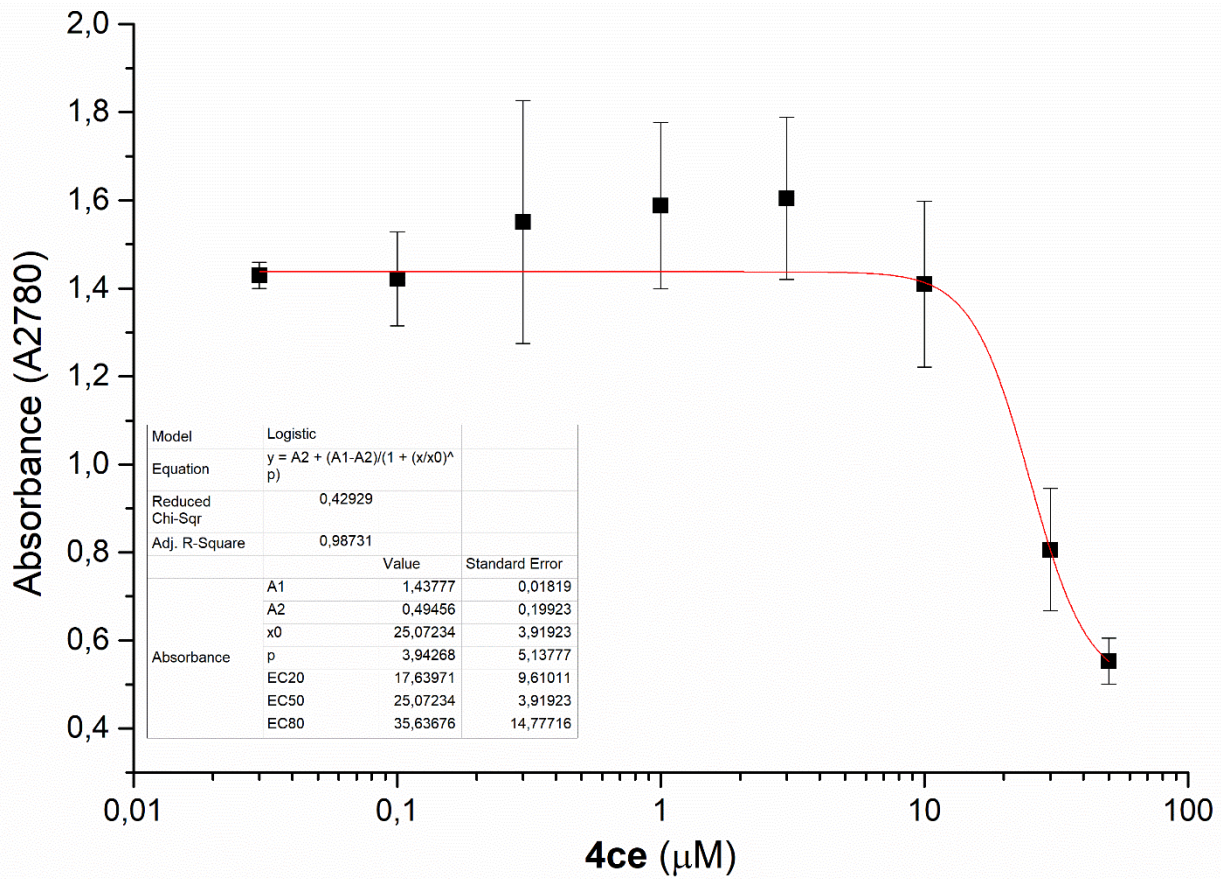

Figure S208. Concentration-dependent effect of *rac*-(6aS\*,12bR\*,17bR\*)-4ce on the viability of A2780 cells.

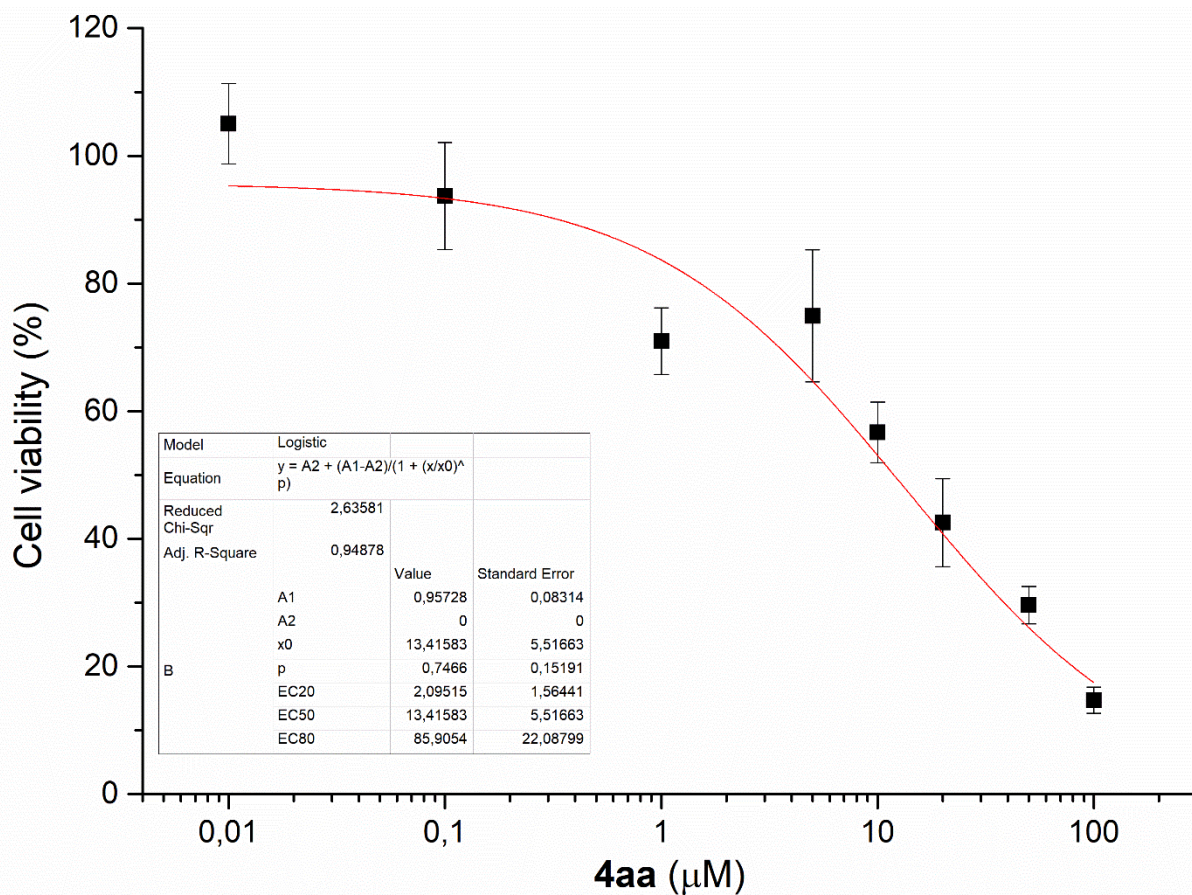

Figure S209. Concentration-dependent effect of *rac*-(6aS\*,12bR\*,19bS\*)-4aa on the viability of CaCo-2 cells.

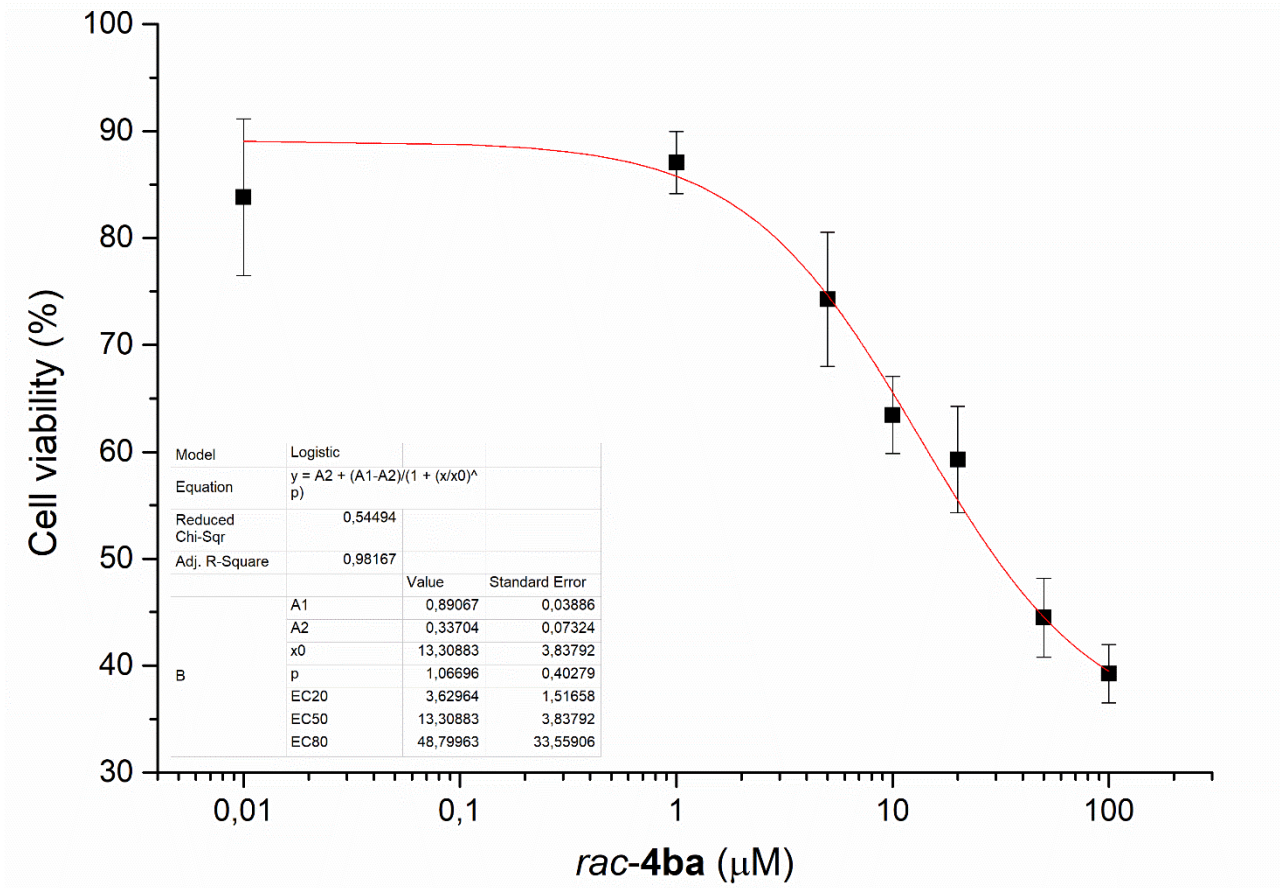

Figure S210. Concentration-dependent effect of *rac*-(6a*S*\*,7*R*\*,12b*R*\*,19b*S*\*)-4ba on the viability of CaCo-2 cells.

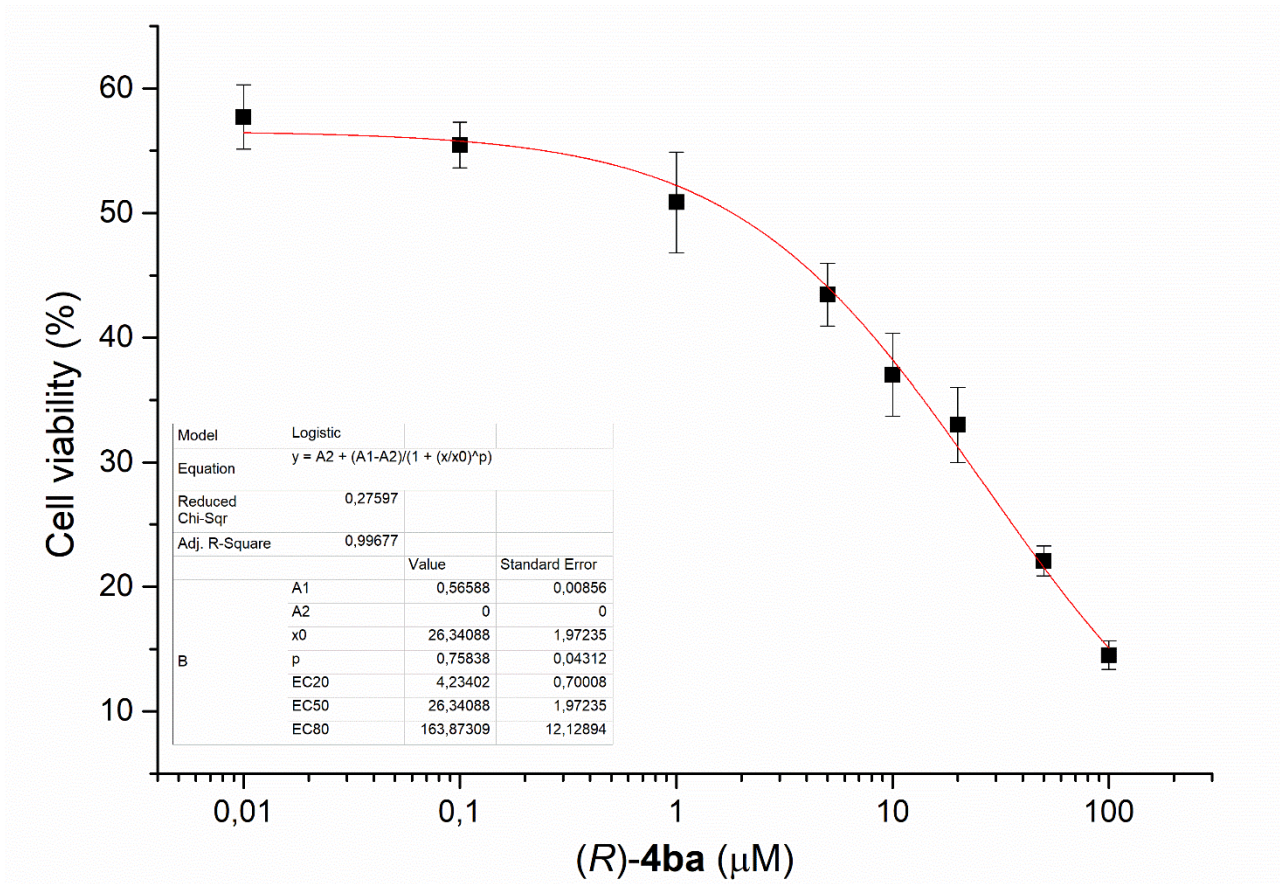

Figure S211. Concentration-dependent effect of (6a*S*,7*R*,12b*R*,19b*S*)-4ba on the viability of CaCo-2 cells.

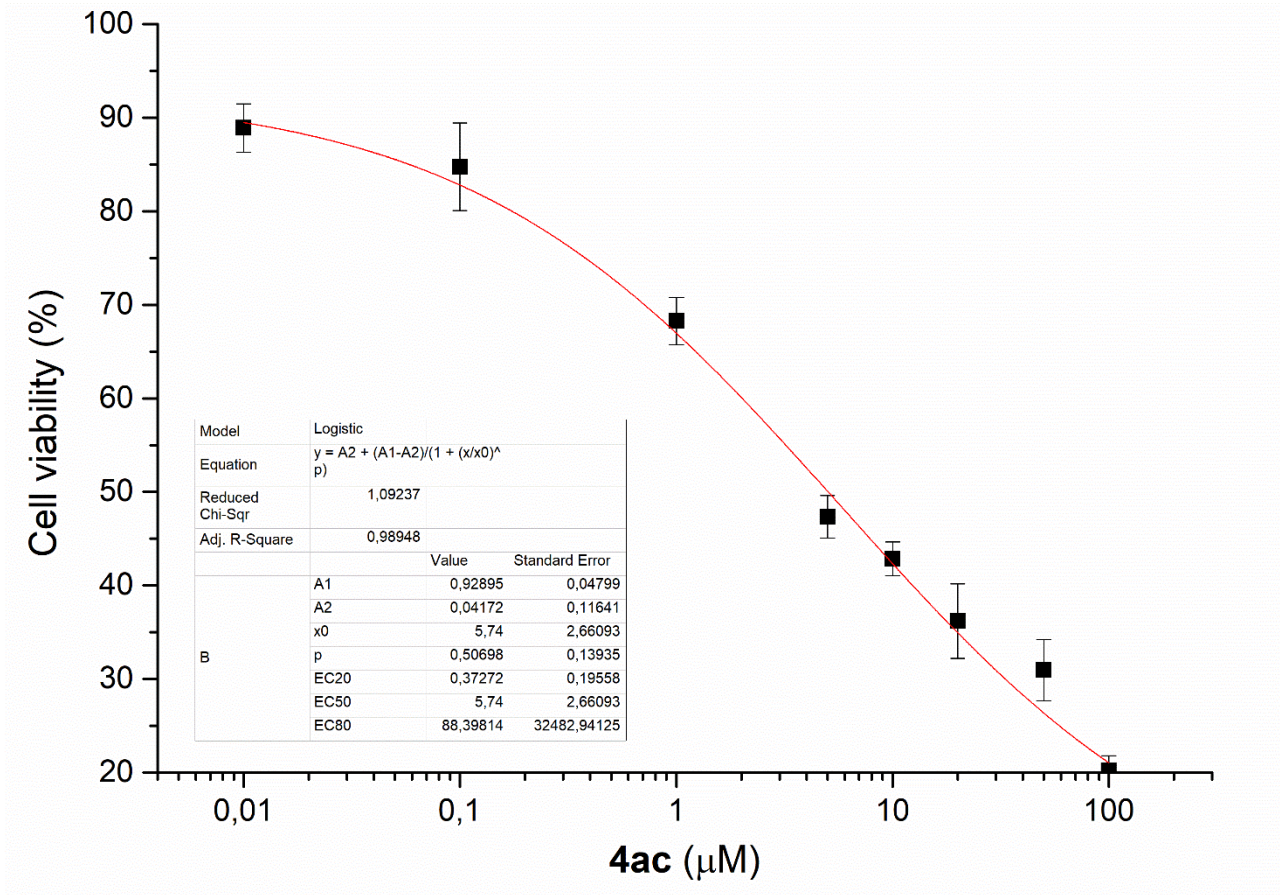

Figure S212. Concentration-dependent effect of *rac*-(6a*S*\*,12b*R*\*,19b*S*\*)-4ac on the viability of CaCo-2 cells.

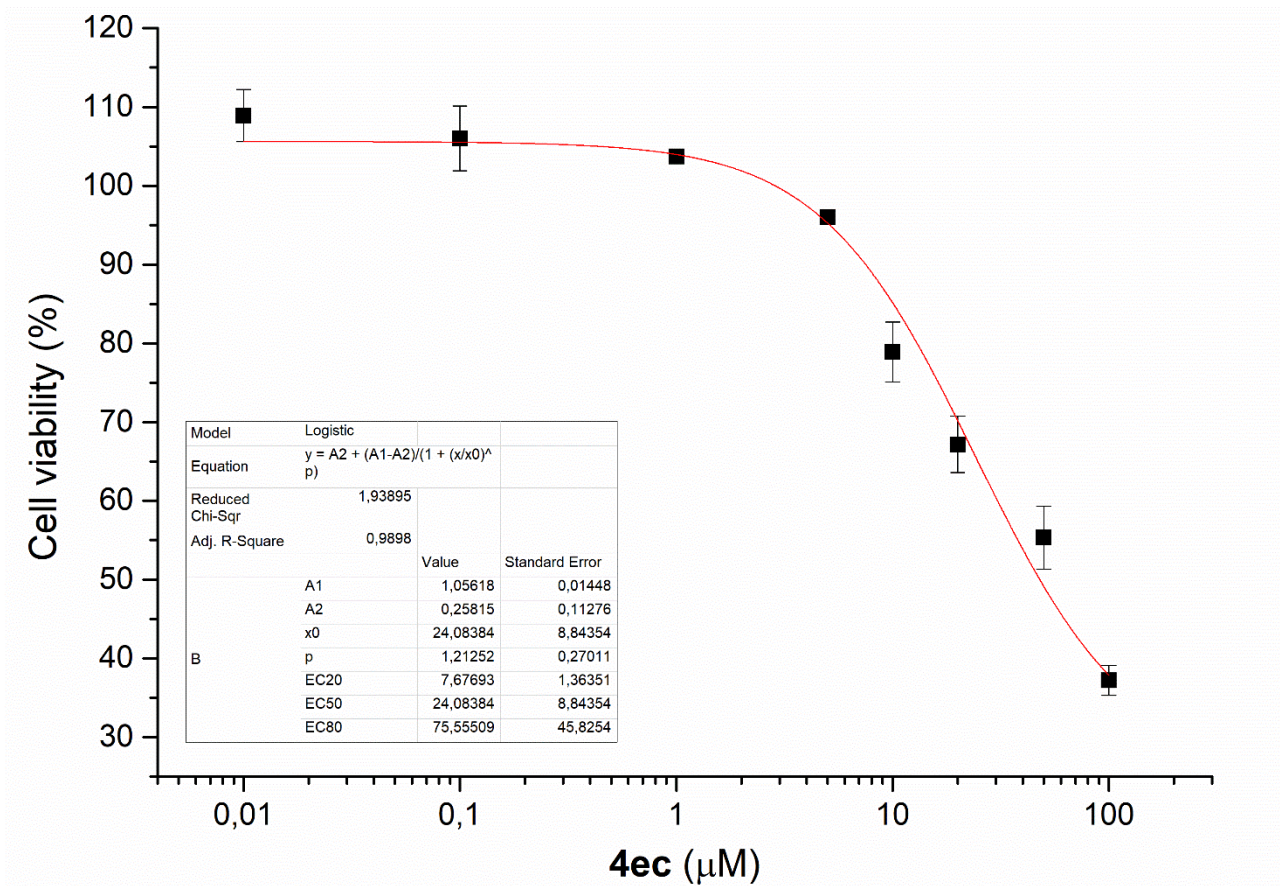

Figure S213. Concentration-dependent effect of *rac*-(6a*S*\*,12b*R*\*,19b*S*\*)-4ec on the viability of CaCo-2 cells.

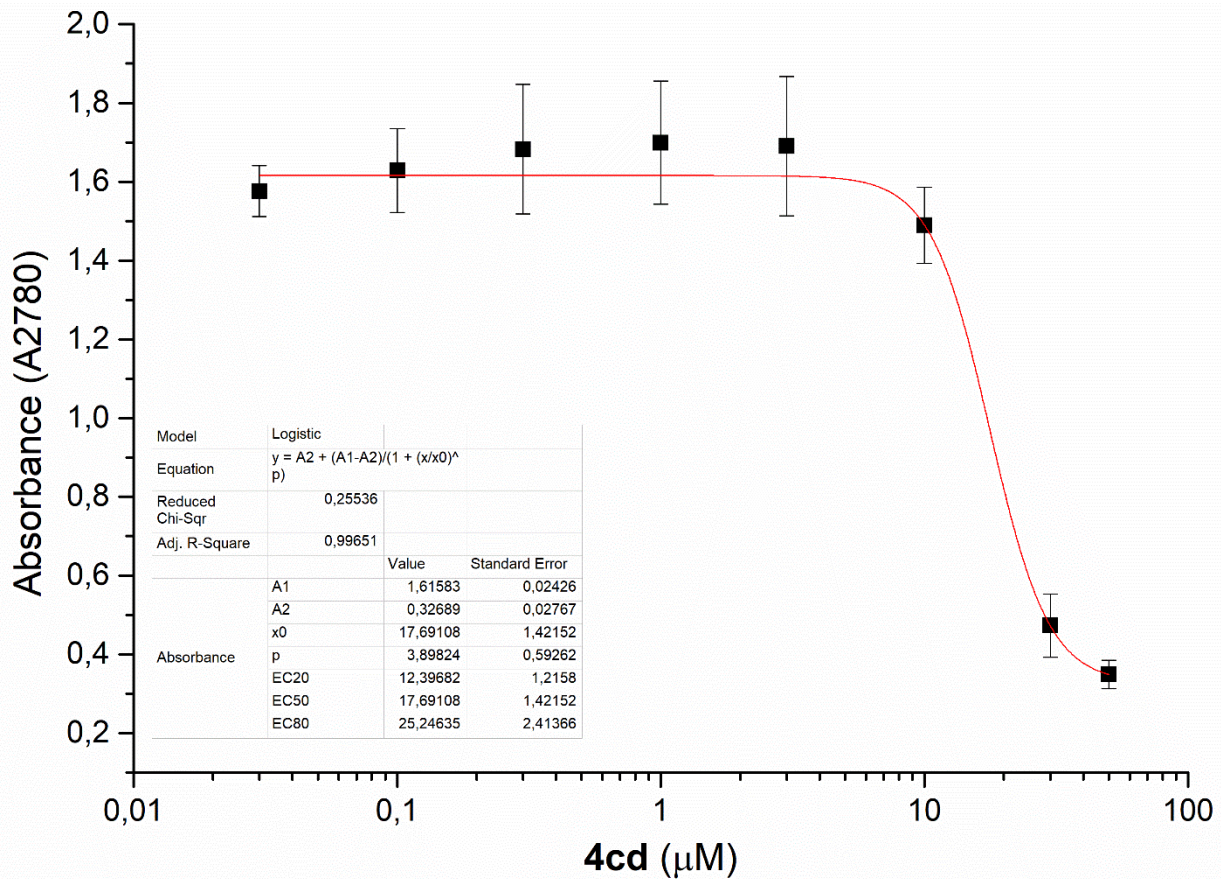

Figure S214. Concentration-dependent effect of *rac*-(6aS\*,12bR\*,19bR\*)-4cd on the viability of A2780 cells.

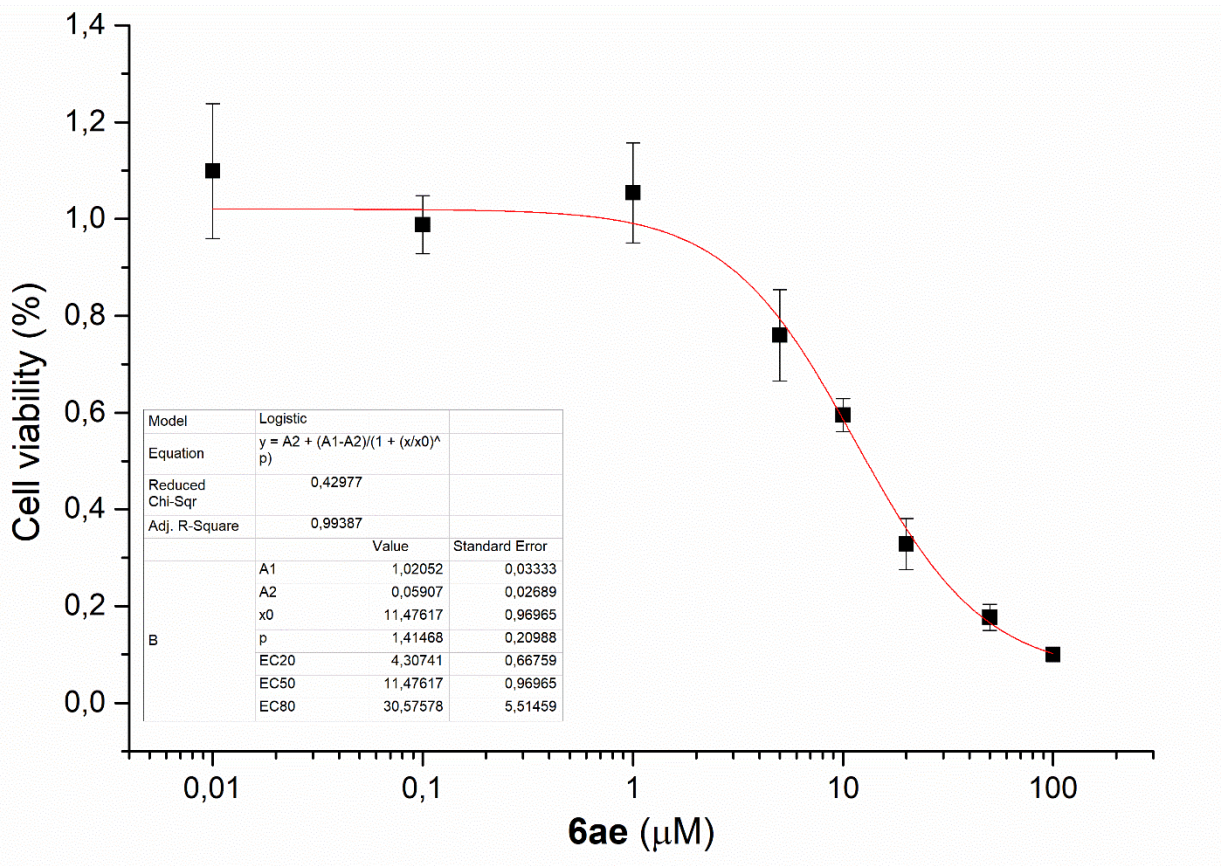

Figure S215. Concentration-dependent effect of *rac*-(6aS\*,12bR\*,17bS\*)-6ae on the viability of CaCo-2 cells.



## 5. X-Ray diffraction data

Table S1. Experimental details of single crystal X-ray diffraction study on *rac*-(6a*S*\*,12b*R*\*,19b*R*\*)-4cc.

|                                                                            |                                                                                         |
|----------------------------------------------------------------------------|-----------------------------------------------------------------------------------------|
| Crystal data                                                               |                                                                                         |
| Chemical formula                                                           | C <sub>30</sub> H <sub>26</sub> O <sub>9</sub>                                          |
| $M_r$                                                                      | 530.51                                                                                  |
| Crystal system, space group                                                | Monoclinic, <i>Pn</i>                                                                   |
| Temperature (K)                                                            | 295                                                                                     |
| $a, b, c$ (Å)                                                              | 12.3718 (6), 10.9412 (5), 18.5382 (8)                                                   |
| $\beta$ (°)                                                                | 92.390 (2)                                                                              |
| $V$ (Å <sup>3</sup> )                                                      | 2507.2 (2)                                                                              |
| $Z$                                                                        | 4                                                                                       |
| Radiation type                                                             | Mo $K\alpha$                                                                            |
| $\mu$ (mm <sup>-1</sup> )                                                  | 0.10                                                                                    |
| Crystal size (mm)                                                          | 0.35 × 0.25 × 0.17                                                                      |
| Data collection                                                            |                                                                                         |
| Diffractometer                                                             | Bruker D8 VENTURE                                                                       |
| Absorption correction                                                      | Multi-scan<br>SADABS2016/2 - Bruker AXS area detector scaling and absorption correction |
| $T_{\min}, T_{\max}$                                                       | 0.89, 0.98                                                                              |
| No. of measured, independent and observed [ $I > 2\sigma(I)$ ] reflections | 34424, 9394, 6156                                                                       |
| $R_{\text{int}}$                                                           | 0.053                                                                                   |
| $(\sin \theta/\lambda)_{\text{max}}$ (Å <sup>-1</sup> )                    | 0.610                                                                                   |
| Refinement                                                                 |                                                                                         |
| $R[F^2 > 2\sigma(F^2)], wR(F^2), S$                                        | 0.074, 0.216, 1.56                                                                      |
| No. of reflections                                                         | 9394                                                                                    |
| No. of parameters                                                          | 712                                                                                     |
| No. of restraints                                                          | 687                                                                                     |
| H-atom treatment                                                           | H-atom parameters constrained                                                           |
| $\Delta_{\text{max}}, \Delta_{\text{min}}$ (e Å <sup>-3</sup> )            | 0.66, -0.51                                                                             |
| Absolute structure                                                         | Refined as an inversion twin.                                                           |
| Absolute structure parameter                                               | 1 (4)                                                                                   |

Table S2. Geometric parameters (Å, °) for *rac*-(6a*S*\*,12b*R*\*,19b*R*\*)-4cc.

|           |            |           |            |
|-----------|------------|-----------|------------|
| C1—C19C   | 1.39 (2)   | C52—H52   | 0.9300     |
| C1—C2     | 1.39 (2)   | C53—C54   | 1.33 (3)   |
| C1—H1     | 0.9300     | C53—H53   | 0.9300     |
| C2—C3     | 1.36 (3)   | C54—C54A  | 1.40 (2)   |
| C2—H2     | 0.9300     | C54—H54   | 0.9300     |
| C3—C4     | 1.38 (3)   | C54A—O55  | 1.366 (19) |
| C3—H3     | 0.9300     | C54A—C69C | 1.37 (2)   |
| C4—C4A    | 1.38 (2)   | C56—O55   | 1.420 (17) |
| C4—H4     | 0.9300     | C56—C56A  | 1.52 (2)   |
| C4A—O5    | 1.368 (19) | C56—H56A  | 0.9700     |
| C4A—C19C  | 1.38 (2)   | C56—H56B  | 0.9700     |
| C6—O5     | 1.422 (17) | C57—O58   | 1.453 (17) |
| C6—C6A    | 1.52 (2)   | C57—C56A  | 1.52 (2)   |
| C6—H6A    | 0.9700     | C57—H57A  | 0.9700     |
| C6—H6B    | 0.9700     | C57—H57B  | 0.9700     |
| C7—O8     | 1.400 (17) | C56A—C62B | 1.53 (2)   |
| C7—C6A    | 1.530 (19) | C56A—C69B | 1.53 (2)   |
| C7—H7A    | 0.9700     | C59—C60   | 1.37 (2)   |
| C7—H7B    | 0.9700     | C59—C58A  | 1.402 (19) |
| C6A—C12B  | 1.50 (2)   | C59—H59   | 0.9300     |
| C6A—C19B  | 1.53 (2)   | C58A—C62A | 1.368 (18) |
| C9—C8A    | 1.354 (19) | C58A—O58  | 1.387 (17) |
| C9—C10    | 1.38 (2)   | C60—C61   | 1.38 (2)   |
| C9—H9     | 0.9300     | C60—H60   | 0.9300     |
| C8A—O8    | 1.372 (17) | C61—O62   | 1.391 (19) |
| C8A—C12A  | 1.414 (18) | C61—C62   | 1.39 (2)   |
| C10—C11   | 1.40 (2)   | C62—C62A  | 1.39 (2)   |
| C10—H10   | 0.9300     | C62—H62   | 0.9300     |
| C11—C12   | 1.353 (18) | C62A—C62B | 1.49 (2)   |
| C11—O20   | 1.368 (18) | C62B—O63  | 1.467 (16) |
| C12—C12A  | 1.399 (19) | C62B—H62B | 0.9800     |
| C12—H12   | 0.9300     | C64—C65   | 1.38 (2)   |
| C12A—C12B | 1.491 (19) | C64—C63B  | 1.44 (2)   |
| C12B—O13  | 1.459 (16) | C64—O72   | 1.436 (16) |
| C12B—H12B | 0.9800     | C63A—O63  | 1.350 (17) |
| C14—O22   | 1.290 (18) | C63A—C69A | 1.37 (2)   |
| C14—C15   | 1.38 (2)   | C63A—C63B | 1.41 (2)   |
| C14—C13B  | 1.41 (2)   | C63B—C67A | 1.38 (2)   |
| C13A—O13  | 1.336 (17) | C65—O74   | 1.374 (18) |

|            |            |               |            |
|------------|------------|---------------|------------|
| C13A—C19A  | 1.34 (2)   | C65—C66       | 1.42 (2)   |
| C13A—C13B  | 1.49 (2)   | C66—C67       | 1.34 (2)   |
| C13B—C17A  | 1.39 (2)   | C66—O76       | 1.363 (19) |
| C15—C16    | 1.38 (2)   | C67—C67A      | 1.39 (2)   |
| C15—O24    | 1.42 (2)   | C67—H67       | 0.9300     |
| C16—O26    | 1.371 (18) | C67A—O68      | 1.352 (17) |
| C16—C17    | 1.39 (2)   | C69—O78       | 1.210 (18) |
| C17—C17A   | 1.37 (2)   | C69—O68       | 1.397 (18) |
| C17—H17    | 0.9300     | C69—C69A      | 1.45 (2)   |
| C17A—O18   | 1.394 (17) | C69A—C69B     | 1.50 (2)   |
| C19—O28    | 1.212 (18) | C69B—C69C     | 1.54 (2)   |
| C19—O18    | 1.376 (18) | C69B—H69B     | 0.9800     |
| C19—C19A   | 1.42 (2)   | C71—O62       | 1.432 (19) |
| C19A—C19B  | 1.52 (2)   | C71—H71A      | 0.9600     |
| C19B—C19C  | 1.54 (2)   | C71—H71B      | 0.9600     |
| C19B—H19B  | 0.9800     | C71—H71C      | 0.9600     |
| C23—O22    | 1.08 (2)   | C73—O72       | 1.401 (15) |
| C23—H23A   | 0.9600     | C73—H73A      | 0.9600     |
| C23—H23B   | 0.9600     | C73—H73B      | 0.9600     |
| C23—H23C   | 0.9600     | C73—H73C      | 0.9600     |
| C25—O24    | 1.35 (2)   | C75—O74       | 1.42 (2)   |
| C25—H25A   | 0.9600     | C75—H75A      | 0.9600     |
| C25—H25B   | 0.9600     | C75—H75B      | 0.9600     |
| C25—H25C   | 0.9600     | C75—H75C      | 0.9600     |
| C27—O26    | 1.38 (2)   | C77—O76       | 1.46 (2)   |
| C27—H27A   | 0.9600     | C77—H77A      | 0.9600     |
| C27—H27B   | 0.9600     | C77—H77B      | 0.9600     |
| C27—H27C   | 0.9600     | C77—H77C      | 0.9600     |
| C51—C52    | 1.36 (2)   | C121—O20      | 1.405 (19) |
| C51—C69C   | 1.42 (2)   | C121—H12A     | 0.9600     |
| C51—H51    | 0.9300     | C121—H12C     | 0.9600     |
| C52—C53    | 1.40 (3)   | C121—H12D     | 0.9600     |
|            |            |               |            |
| C19C—C1—C2 | 120.5 (18) | C69C—C54A—C54 | 122.5 (16) |
| C19C—C1—H1 | 119.8000   | O55—C56—C56A  | 112.7 (12) |
| C2—C1—H1   | 119.8000   | O55—C56—H56A  | 109.0000   |
| C3—C2—C1   | 121.3 (17) | C56A—C56—H56A | 109.0000   |
| C3—C2—H2   | 119.3000   | O55—C56—H56B  | 109.0000   |
| C1—C2—H2   | 119.3000   | C56A—C56—H56B | 109.0000   |
| C2—C3—C4   | 118.4 (17) | H56A—C56—H56B | 107.8000   |

|               |            |                |            |
|---------------|------------|----------------|------------|
| C2—C3—H3      | 120.8000   | O58—C57—C56A   | 111.1 (12) |
| C4—C3—H3      | 120.8000   | O58—C57—H57A   | 109.4000   |
| C4A—C4—C3     | 120.7 (18) | C56A—C57—H57A  | 109.4000   |
| C4A—C4—H4     | 119.6000   | O58—C57—H57B   | 109.4000   |
| C3—C4—H4      | 119.6000   | C56A—C57—H57B  | 109.4000   |
| O5—C4A—C4     | 114.6 (16) | H57A—C57—H57B  | 108.0000   |
| O5—C4A—C19C   | 124.2 (13) | C57—C56A—C56   | 107.2 (11) |
| C4—C4A—C19C   | 121.2 (16) | C57—C56A—C62B  | 109.0 (12) |
| O5—C6—C6A     | 113.7 (12) | C56—C56A—C62B  | 109.8 (12) |
| O5—C6—H6A     | 108.8000   | C57—C56A—C69B  | 110.4 (12) |
| C6A—C6—H6A    | 108.8000   | C56—C56A—C69B  | 110.0 (12) |
| O5—C6—H6B     | 108.8000   | C62B—C56A—C69B | 110.3 (11) |
| C6A—C6—H6B    | 108.8000   | C60—C59—C58A   | 118.4 (12) |
| H6A—C6—H6B    | 107.7000   | C60—C59—H59    | 120.8000   |
| O8—C7—C6A     | 112.6 (12) | C58A—C59—H59   | 120.8000   |
| O8—C7—H7A     | 109.1000   | C62A—C58A—O58  | 123.7 (12) |
| C6A—C7—H7A    | 109.1000   | C62A—C58A—C59  | 120.8 (13) |
| O8—C7—H7B     | 109.1000   | O58—C58A—C59   | 115.4 (11) |
| C6A—C7—H7B    | 109.1000   | C59—C60—C61    | 121.6 (13) |
| H7A—C7—H7B    | 107.8000   | C59—C60—H60    | 119.2000   |
| C12B—C6A—C6   | 112.3 (12) | C61—C60—H60    | 119.2000   |
| C12B—C6A—C7   | 106.5 (12) | C60—C61—O62    | 115.3 (13) |
| C6—C6A—C7     | 108.6 (12) | C60—C61—C62    | 119.4 (14) |
| C12B—C6A—C19B | 110.1 (11) | O62—C61—C62    | 125.3 (13) |
| C6—C6A—C19B   | 106.7 (12) | C62A—C62—C61   | 119.5 (13) |
| C7—C6A—C19B   | 112.8 (12) | C62A—C62—H62   | 120.3000   |
| C8A—C9—C10    | 121.5 (13) | C61—C62—H62    | 120.3000   |
| C8A—C9—H9     | 119.3000   | C58A—C62A—C62  | 120.2 (13) |
| C10—C9—H9     | 119.3000   | C58A—C62A—C62B | 121.1 (13) |
| C9—C8A—O8     | 118.3 (12) | C62—C62A—C62B  | 118.7 (12) |
| C9—C8A—C12A   | 119.4 (13) | O63—C62B—C62A  | 106.1 (11) |
| O8—C8A—C12A   | 122.3 (12) | O63—C62B—C56A  | 111.8 (11) |
| C9—C10—C11    | 119.8 (13) | C62A—C62B—C56A | 110.6 (11) |
| C9—C10—H10    | 120.1000   | O63—C62B—H62B  | 109.4000   |
| C11—C10—H10   | 120.1000   | C62A—C62B—H62B | 109.4000   |
| C12—C11—O20   | 124.7 (12) | C56A—C62B—H62B | 109.4000   |
| C12—C11—C10   | 119.2 (13) | C65—C64—C63B   | 120.7 (13) |
| O20—C11—C10   | 116.1 (12) | C65—C64—O72    | 119.2 (12) |
| C11—C12—C12A  | 121.5 (12) | C63B—C64—O72   | 119.9 (12) |
| C11—C12—H12   | 119.3000   | O63—C63A—C69A  | 120.8 (13) |
| C12A—C12—H12  | 119.3000   | O63—C63A—C63B  | 116.8 (12) |

|                |            |                |            |
|----------------|------------|----------------|------------|
| C12—C12A—C8A   | 118.5 (12) | C69A—C63A—C63B | 122.4 (13) |
| C12—C12A—C12B  | 122.4 (11) | C67A—C63B—C63A | 117.0 (13) |
| C8A—C12A—C12B  | 119.1 (12) | C67A—C63B—C64  | 116.0 (13) |
| O13—C12B—C12A  | 104.7 (11) | C63A—C63B—C64  | 126.8 (13) |
| O13—C12B—C6A   | 114.1 (11) | O74—C65—C64    | 118.0 (14) |
| C12A—C12B—C6A  | 113.0 (11) | O74—C65—C66    | 121.8 (13) |
| O13—C12B—H12B  | 108.3000   | C64—C65—C66    | 120.1 (14) |
| C12A—C12B—H12B | 108.3000   | C67—C66—O76    | 127.0 (15) |
| C6A—C12B—H12B  | 108.3000   | C67—C66—C65    | 119.5 (14) |
| O22—C14—C15    | 119.3 (14) | O76—C66—C65    | 113.4 (15) |
| O22—C14—C13B   | 120.6 (14) | C66—C67—C67A   | 120.5 (15) |
| C15—C14—C13B   | 120.0 (13) | C66—C67—H67    | 119.7000   |
| O13—C13A—C19A  | 125.4 (13) | C67A—C67—H67   | 119.7000   |
| O13—C13A—C13B  | 114.5 (12) | O68—C67A—C63B  | 122.0 (13) |
| C19A—C13A—C13B | 120.0 (13) | O68—C67A—C67   | 115.0 (13) |
| C17A—C13B—C14  | 117.2 (14) | C63B—C67A—C67  | 123.0 (14) |
| C17A—C13B—C13A | 116.9 (13) | O78—C69—O68    | 117.8 (14) |
| C14—C13B—C13A  | 125.9 (12) | O78—C69—C69A   | 125.7 (15) |
| C14—C15—C16    | 120.6 (15) | O68—C69—C69A   | 116.5 (14) |
| C14—C15—O24    | 117.8 (15) | C63A—C69A—C69  | 119.3 (14) |
| C16—C15—O24    | 120.0 (14) | C63A—C69A—C69B | 123.1 (13) |
| O26—C16—C15    | 117.8 (15) | C69—C69A—C69B  | 117.4 (13) |
| O26—C16—C17    | 121.8 (15) | C69A—C69B—C56A | 110.1 (12) |
| C15—C16—C17    | 120.4 (14) | C69A—C69B—C69C | 113.5 (12) |
| C17A—C17—C16   | 117.9 (14) | C56A—C69B—C69C | 109.1 (12) |
| C17A—C17—H17   | 121.0000   | C69A—C69B—H69B | 108.0000   |
| C16—C17—H17    | 121.0000   | C56A—C69B—H69B | 108.0000   |
| C17—C17A—C13B  | 123.8 (14) | C69C—C69B—H69B | 108.0000   |
| C17—C17A—O18   | 115.1 (12) | C54A—C69C—C51  | 116.5 (13) |
| C13B—C17A—O18  | 121.1 (13) | C54A—C69C—C69B | 122.2 (13) |
| O28—C19—O18    | 114.3 (14) | C51—C69C—C69B  | 121.0 (14) |
| O28—C19—C19A   | 126.9 (15) | O62—C71—H71A   | 109.5000   |
| O18—C19—C19A   | 118.8 (14) | O62—C71—H71B   | 109.5000   |
| C13A—C19A—C19  | 121.5 (14) | H71A—C71—H71B  | 109.5000   |
| C13A—C19A—C19B | 120.0 (13) | O62—C71—H71C   | 109.5000   |
| C19—C19A—C19B  | 118.5 (13) | H71A—C71—H71C  | 109.5000   |
| C19A—C19B—C6A  | 109.6 (12) | H71B—C71—H71C  | 109.5000   |
| C19A—C19B—C19C | 112.7 (11) | O72—C73—H73A   | 109.5000   |
| C6A—C19B—C19C  | 110.2 (12) | O72—C73—H73B   | 109.5000   |
| C19A—C19B—H19B | 108.1000   | H73A—C73—H73B  | 109.5000   |
| C6A—C19B—H19B  | 108.1000   | O72—C73—H73C   | 109.5000   |

|                |            |                    |            |
|----------------|------------|--------------------|------------|
| C19C—C19B—H19B | 108.1000   | H73A—C73—H73C      | 109.5000   |
| C4A—C19C—C1    | 117.8 (14) | H73B—C73—H73C      | 109.5000   |
| C4A—C19C—C19B  | 120.3 (13) | O74—C75—H75A       | 109.5000   |
| C1—C19C—C19B   | 121.9 (14) | O74—C75—H75B       | 109.5000   |
| O22—C23—H23A   | 109.5000   | H75A—C75—H75B      | 109.5000   |
| O22—C23—H23B   | 109.5000   | O74—C75—H75C       | 109.5000   |
| H23A—C23—H23B  | 109.5000   | H75A—C75—H75C      | 109.5000   |
| O22—C23—H23C   | 109.5000   | H75B—C75—H75C      | 109.5000   |
| H23A—C23—H23C  | 109.5000   | O76—C77—H77A       | 109.5000   |
| H23B—C23—H23C  | 109.5000   | O76—C77—H77B       | 109.5000   |
| O24—C25—H25A   | 109.5000   | H77A—C77—H77B      | 109.5000   |
| O24—C25—H25B   | 109.5000   | O76—C77—H77C       | 109.5000   |
| H25A—C25—H25B  | 109.5000   | H77A—C77—H77C      | 109.5000   |
| O24—C25—H25C   | 109.5000   | H77B—C77—H77C      | 109.5000   |
| H25A—C25—H25C  | 109.5000   | O20—C121—H12A      | 109.5000   |
| H25B—C25—H25C  | 109.5000   | O20—C121—H12C      | 109.5000   |
| O26—C27—H27A   | 109.5000   | H12A—C121—H12C     | 109.5000   |
| O26—C27—H27B   | 109.5000   | O20—C121—H12D      | 109.5000   |
| H27A—C27—H27B  | 109.5000   | H12A—C121—H12D     | 109.5000   |
| O26—C27—H27C   | 109.5000   | H12C—C121—H12D     | 109.5000   |
| H27A—C27—H27C  | 109.5000   | C4A—O5—C6          | 114.4 (12) |
| H27B—C27—H27C  | 109.5000   | C8A—O8—C7          | 116.5 (10) |
| C52—C51—C69C   | 121.7 (18) | C13A—O13—C12B      | 118.7 (11) |
| C52—C51—H51    | 119.1000   | C19—O18—C17A       | 121.6 (11) |
| C69C—C51—H51   | 119.1000   | C11—O20—C121       | 118.6 (12) |
| C51—C52—C53    | 118.7 (18) | C23—O22—C14        | 146 (2)    |
| C51—C52—H52    | 120.7000   | C25—O24—C15        | 108.0 (16) |
| C53—C52—H52    | 120.7000   | C16—O26—C27        | 120.3 (14) |
| C54—C53—C52    | 121.9 (17) | C54A—O55—C56       | 117.8 (13) |
| C54—C53—H53    | 119.1000   | C58A—O58—C57       | 115.9 (10) |
| C52—C53—H53    | 119.1000   | C61—O62—C71        | 115.8 (12) |
| C53—C54—C54A   | 118.6 (19) | C63A—O63—C62B      | 121.7 (11) |
| C53—C54—H54    | 120.7000   | C67A—O68—C69       | 122.5 (12) |
| C54A—C54—H54   | 120.7000   | C73—O72—C64        | 114.1 (10) |
| O55—C54A—C69C  | 122.7 (13) | C65—O74—C75        | 119.7 (13) |
| O55—C54A—C54   | 114.8 (16) | C66—O76—C77        | 114.1 (14) |
|                |            |                    |            |
| C19C—C1—C2—C3  | 1 (3)      | C61—C62—C62A—C58A  | 1 (2)      |
| C1—C2—C3—C4    | 1 (3)      | C61—C62—C62A—C62B  | 179.3 (11) |
| C2—C3—C4—C4A   | -2 (3)     | C58A—C62A—C62B—O63 | 101.2 (14) |

|                     |             |                     |             |
|---------------------|-------------|---------------------|-------------|
| C3—C4—C4A—O5        | -176.1 (16) | C62—C62A—C62B—O63   | -77.1 (15)  |
| C3—C4—C4A—C19C      | 1 (3)       | C58A—C62A—C62B—C56A | -20.2 (17)  |
| O5—C6—C6A—C12B      | -56.9 (17)  | C62—C62A—C62B—C56A  | 161.4 (13)  |
| O5—C6—C6A—C7        | -174.3 (13) | C57—C56A—C62B—O63   | -69.8 (15)  |
| O5—C6—C6A—C19B      | 63.8 (15)   | C56—C56A—C62B—O63   | 173.0 (10)  |
| O8—C7—C6A—C12B      | -62.8 (15)  | C69B—C56A—C62B—O63  | 51.7 (15)   |
| O8—C7—C6A—C6        | 58.3 (16)   | C57—C56A—C62B—C62A  | 48.2 (15)   |
| O8—C7—C6A—C19B      | 176.4 (12)  | C56—C56A—C62B—C62A  | -69.0 (14)  |
| C10—C9—C8A—O8       | 178.2 (13)  | C69B—C56A—C62B—C62A | 169.6 (11)  |
| C10—C9—C8A—C12A     | 0 (2)       | O63—C63A—C63B—C67A  | -176.9 (13) |
| C8A—C9—C10—C11      | 1 (2)       | C69A—C63A—C63B—C67A | 4 (2)       |
| C9—C10—C11—C12      | -1.2 (19)   | O63—C63A—C63B—C64   | 6 (2)       |
| C9—C10—C11—O20      | 179.1 (13)  | C69A—C63A—C63B—C64  | -172.2 (14) |
| O20—C11—C12—C12A    | -179.9 (13) | C65—C64—C63B—C67A   | 4.8 (19)    |
| C10—C11—C12—C12A    | 0.5 (19)    | O72—C64—C63B—C67A   | -169.9 (11) |
| C11—C12—C12A—C8A    | 0 (2)       | C65—C64—C63B—C63A   | -178.6 (13) |
| C11—C12—C12A—C12B   | -178.9 (12) | O72—C64—C63B—C63A   | 7 (2)       |
| C9—C8A—C12A—C12     | -1 (2)      | C63B—C64—C65—O74    | -177.8 (12) |
| O8—C8A—C12A—C12     | -178.9 (13) | O72—C64—C65—O74     | -3.2 (18)   |
| C9—C8A—C12A—C12B    | 178.7 (13)  | C63B—C64—C65—C66    | -2 (2)      |
| O8—C8A—C12A—C12B    | 0.4 (19)    | O72—C64—C65—C66     | 172.4 (12)  |
| C12—C12A—C12B—O13   | -75.8 (15)  | O74—C65—C66—C67     | 173.1 (13)  |
| C8A—C12A—C12B—O13   | 104.9 (13)  | C64—C65—C66—C67     | -2 (2)      |
| C12—C12A—C12B—C6A   | 159.5 (13)  | O74—C65—C66—O76     | -5 (2)      |
| C8A—C12A—C12B—C6A   | -19.9 (17)  | C64—C65—C66—O76     | -179.9 (12) |
| C6—C6A—C12B—O13     | 169.7 (11)  | O76—C66—C67—C67A    | -178.6 (14) |
| C7—C6A—C12B—O13     | -71.7 (14)  | C65—C66—C67—C67A    | 4 (2)       |
| C19B—C6A—C12B—O13   | 50.9 (15)   | C63A—C63B—C67A—O68  | -2 (2)      |
| C6—C6A—C12B—C12A    | -70.9 (15)  | C64—C63B—C67A—O68   | 174.8 (12)  |
| C7—C6A—C12B—C12A    | 47.8 (15)   | C63A—C63B—C67A—C67  | -179.9 (13) |
| C19B—C6A—C12B—C12A  | 170.3 (11)  | C64—C63B—C67A—C67   | -3 (2)      |
| O22—C14—C13B—C17A   | -179.9 (18) | C66—C67—C67A—O68    | -179.4 (13) |
| C15—C14—C13B—C17A   | 0 (3)       | C66—C67—C67A—C63B   | -1 (2)      |
| O22—C14—C13B—C13A   | -1 (3)      | O63—C63A—C69A—C69   | 175.6 (13)  |
| C15—C14—C13B—C13A   | 178.6 (15)  | C63B—C63A—C69A—C69  | -6 (2)      |
| O13—C13A—C13B—C17A  | -177.3 (13) | O63—C63A—C69A—C69B  | 1 (2)       |
| C19A—C13A—C13B—C17A | -2 (2)      | C63B—C63A—C69A—C69B | 179.2 (13)  |
| O13—C13A—C13B—C14   | 4 (2)       | O78—C69—C69A—C63A   | -176.9 (15) |
| C19A—C13A—C13B—C14  | 179.2 (16)  | O68—C69—C69A—C63A   | 5 (2)       |
| O22—C14—C15—C16     | 179.1 (19)  | O78—C69—C69A—C69B   | -2 (2)      |
| C13B—C14—C15—C16    | 0 (3)       | O68—C69—C69A—C69B   | -180.0 (12) |

|                     |             |                     |             |
|---------------------|-------------|---------------------|-------------|
| O22—C14—C15—O24     | 14 (3)      | C63A—C69A—C69B—C56A | 23.5 (18)   |
| C13B—C14—C15—O24    | -165.8 (16) | C69—C69A—C69B—C56A  | -151.6 (13) |
| C14—C15—C16—O26     | -177.7 (16) | C63A—C69A—C69B—C69C | -99.1 (16)  |
| O24—C15—C16—O26     | -13 (3)     | C69—C69A—C69B—C69C  | 85.8 (16)   |
| C14—C15—C16—C17     | 1 (3)       | C57—C56A—C69B—C69A  | 72.5 (15)   |
| O24—C15—C16—C17     | 166.6 (14)  | C56—C56A—C69B—C69A  | -169.4 (11) |
| O26—C16—C17—C17A    | 177.5 (14)  | C62B—C56A—C69B—C69A | -48.1 (15)  |
| C15—C16—C17—C17A    | -2 (2)      | C57—C56A—C69B—C69C  | -162.3 (11) |
| C16—C17—C17A—C13B   | 1 (2)       | C56—C56A—C69B—C69C  | -44.2 (15)  |
| C16—C17—C17A—O18    | -178.9 (13) | C62B—C56A—C69B—C69C | 77.1 (14)   |
| C14—C13B—C17A—C17   | 0 (2)       | O55—C54A—C69C—C51   | 178.3 (14)  |
| C13A—C13B—C17A—C17  | -179.0 (13) | C54—C54A—C69C—C51   | 0 (2)       |
| C14—C13B—C17A—O18   | 179.9 (14)  | O55—C54A—C69C—C69B  | 4 (2)       |
| C13A—C13B—C17A—O18  | 1 (2)       | C54—C54A—C69C—C69B  | -175.0 (15) |
| O13—C13A—C19A—C19   | 175.8 (13)  | C52—C51—C69C—C54A   | 2 (2)       |
| C13B—C13A—C19A—C19  | 1 (2)       | C52—C51—C69C—C69B   | 177.0 (14)  |
| O13—C13A—C19A—C19B  | -5 (2)      | C69A—C69B—C69C—C54A | 138.7 (14)  |
| C13B—C13A—C19A—C19B | -179.6 (12) | C56A—C69B—C69C—C54A | 15.5 (19)   |
| O28—C19—C19A—C13A   | -177.4 (16) | C69A—C69B—C69C—C51  | -35.7 (19)  |
| O18—C19—C19A—C13A   | 1 (2)       | C56A—C69B—C69C—C51  | -158.8 (13) |
| O28—C19—C19A—C19B   | 3 (3)       | C4—C4A—O5—C6        | -167.7 (14) |
| O18—C19—C19A—C19B   | -178.5 (12) | C19C—C4A—O5—C6      | 16 (2)      |
| C13A—C19A—C19B—C6A  | 28.1 (18)   | C6A—C6—O5—C4A       | -47.4 (18)  |
| C19—C19A—C19B—C6A   | -152.3 (13) | C9—C8A—O8—C7        | 167.7 (13)  |
| C13A—C19A—C19B—C19C | -95.1 (16)  | C12A—C8A—O8—C7      | -14 (2)     |
| C19—C19A—C19B—C19C  | 84.6 (16)   | C6A—C7—O8—C8A       | 46.1 (18)   |
| C12B—C6A—C19B—C19A  | -49.4 (15)  | C19A—C13A—O13—C12B  | 4 (2)       |
| C6—C6A—C19B—C19A    | -171.5 (11) | C13B—C13A—O13—C12B  | 179.0 (11)  |
| C7—C6A—C19B—C19A    | 69.4 (15)   | C12A—C12B—O13—C13A  | -152.0 (12) |
| C12B—C6A—C19B—C19C  | 75.2 (14)   | C6A—C12B—O13—C13A   | -27.9 (16)  |
| C6—C6A—C19B—C19C    | -46.9 (15)  | O28—C19—O18—C17A    | 176.6 (13)  |
| C7—C6A—C19B—C19C    | -166.0 (12) | C19A—C19—O18—C17A   | -2 (2)      |
| O5—C4A—C19C—C1      | 177.7 (14)  | C17—C17A—O18—C19    | -179.1 (13) |
| C4—C4A—C19C—C1      | 1 (2)       | C13B—C17A—O18—C19   | 1 (2)       |
| O5—C4A—C19C—C19B    | -2 (2)      | C12—C11—O20—C121    | 14 (2)      |
| C4—C4A—C19C—C19B    | -179.0 (14) | C10—C11—O20—C121    | -166.2 (14) |
| C2—C1—C19C—C4A      | -2 (2)      | C15—C14—O22—C23     | 49 (5)      |
| C2—C1—C19C—C19B     | 178.3 (14)  | C13B—C14—O22—C23    | -131 (4)    |
| C19A—C19B—C19C—C4A  | 142.9 (14)  | C14—C15—O24—C25     | -119.1 (18) |
| C6A—C19B—C19C—C4A   | 20.1 (19)   | C16—C15—O24—C25     | 75 (2)      |
| C19A—C19B—C19C—C1   | -37.3 (19)  | C15—C16—O26—C27     | 177.0 (16)  |

|                    |             |                    |             |
|--------------------|-------------|--------------------|-------------|
| C6A—C19B—C19C—C1   | -160.0 (14) | C17—C16—O26—C27    | -2 (2)      |
| C69C—C51—C52—C53   | -3 (3)      | C69C—C54A—O55—C56  | 9 (2)       |
| C51—C52—C53—C54    | 1 (3)       | C54—C54A—O55—C56   | -172.0 (14) |
| C52—C53—C54—C54A   | 1 (3)       | C56A—C56—O55—C54A  | -40.9 (18)  |
| C53—C54—C54A—O55   | -179.9 (17) | C62A—C58A—O58—C57  | -13.6 (19)  |
| C53—C54—C54A—C69C  | -1 (3)      | C59—C58A—O58—C57   | 169.0 (11)  |
| O58—C57—C56A—C56   | 57.7 (16)   | C56A—C57—O58—C58A  | 43.4 (16)   |
| O58—C57—C56A—C62B  | -61.1 (15)  | C60—C61—O62—C71    | -167.0 (14) |
| O58—C57—C56A—C69B  | 177.5 (11)  | C62—C61—O62—C71    | 13 (2)      |
| O55—C56—C56A—C57   | 179.2 (13)  | C69A—C63A—O63—C62B | 2 (2)       |
| O55—C56—C56A—C62B  | -62.5 (16)  | C63B—C63A—O63—C62B | -176.5 (11) |
| O55—C56—C56A—C69B  | 59.2 (16)   | C62A—C62B—O63—C63A | -149.8 (12) |
| C60—C59—C58A—C62A  | 2 (2)       | C56A—C62B—O63—C63A | -29.1 (16)  |
| C60—C59—C58A—O58   | 179.9 (12)  | C63B—C67A—O68—C69  | 2 (2)       |
| C58A—C59—C60—C61   | -1 (2)      | C67—C67A—O68—C69   | 179.5 (13)  |
| C59—C60—C61—O62    | 179.1 (13)  | O78—C69—O68—C67A   | 178.7 (14)  |
| C59—C60—C61—C62    | -1 (2)      | C69A—C69—O68—C67A  | -3 (2)      |
| C60—C61—C62—C62A   | 1 (2)       | C65—C64—O72—C73    | 80.6 (15)   |
| O62—C61—C62—C62A   | -179.2 (13) | C63B—C64—O72—C73   | -104.7 (15) |
| O58—C58A—C62A—C62  | -179.9 (13) | C64—C65—O74—C75    | -117.2 (17) |
| C59—C58A—C62A—C62  | -3 (2)      | C66—C65—O74—C75    | 67 (2)      |
| O58—C58A—C62A—C62B | 2 (2)       | C67—C66—O76—C77    | -4 (2)      |
| C59—C58A—C62A—C62B | 179.0 (13)  | C65—C66—O76—C77    | 173.7 (14)  |

Table S3. Hydrogen-bond geometry (Å, °) for *rac*-(6a*S*\*,12b*R*\*,19b*R*\*)-4cc.

| <i>D</i> —H... <i>A</i>                 | <i>D</i> —H | H... <i>A</i> | <i>D</i> ... <i>A</i> | <i>D</i> —H... <i>A</i> |
|-----------------------------------------|-------------|---------------|-----------------------|-------------------------|
| C6—H6 <i>B</i> ...O78 <sup>i</sup>      | 0.97        | 2.55          | 3.398 (18)            | 146                     |
| C7—H7 <i>B</i> ...O78 <sup>i</sup>      | 0.97        | 2.61          | 3.451 (19)            | 145                     |
| C9—H9...O24 <sup>ii</sup>               | 0.93        | 2.51          | 3.423 (19)            | 169                     |
| C23—H23 <i>A</i> ...O55                 | 0.96        | 2.41          | 3.24 (3)              | 145                     |
| C56—H56 <i>B</i> ...O28 <sup>iii</sup>  | 0.97        | 2.52          | 3.410 (19)            | 153                     |
| C57—H57 <i>B</i> ...O28 <sup>iii</sup>  | 0.97        | 2.58          | 3.428 (19)            | 146                     |
| C59—H59...O74 <sup>ii</sup>             | 0.93        | 2.45          | 3.371 (18)            | 169                     |
| C71—H71 <i>A</i> ...O78 <sup>iv</sup>   | 0.96        | 2.59          | 3.29 (2)              | 130                     |
| C73—H73 <i>B</i> ...O74                 | 0.96        | 2.61          | 3.136 (19)            | 115                     |
| C75—H75 <i>A</i> ...O76                 | 0.96        | 2.36          | 2.95 (3)              | 119                     |
| C121—H12 <i>A</i> ...O28 <sup>iii</sup> | 0.96        | 2.60          | 3.28 (2)              | 128                     |

Symmetry codes: (i)  $x-1, y-1, z$ ; (ii)  $x, y-1, z$ ; (iii)  $x+1, y, z$ ; (iv)  $x-1, y, z$ .

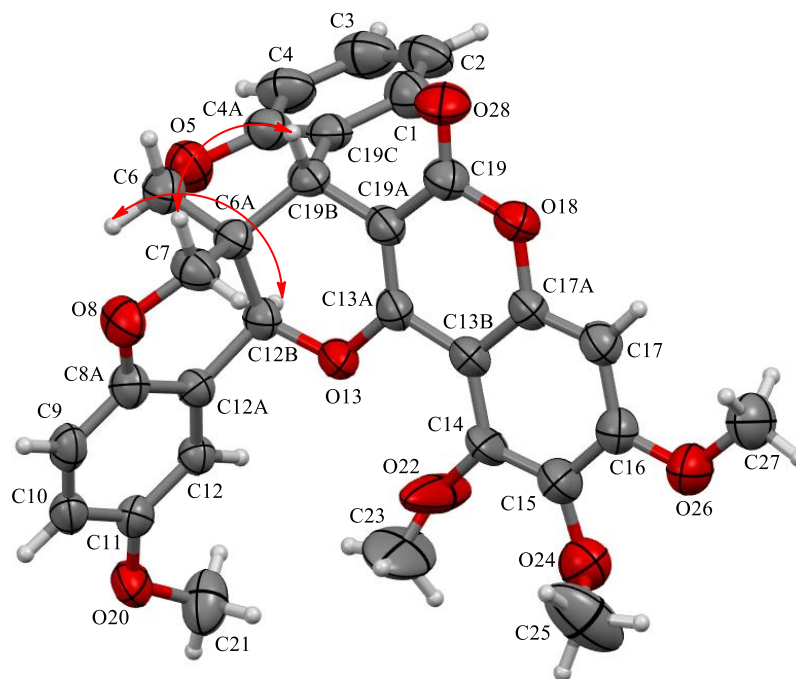

Figure S216. ORTEP view of *rac*-(6a*S*\*,12b*R*\*,19b*R*\*)-4cc with numbering scheme. Red curly arrows represent characteristic NOE correlations for the assignment of relative configuration.

Table S4. Experimental details of single crystal X-ray diffraction study on *rac*-(6a*S*\*,12b*R*\*,19b*R*\*)-6cc.

| Crystal data                                                               |                                                                                             |
|----------------------------------------------------------------------------|---------------------------------------------------------------------------------------------|
| Chemical formula                                                           | C <sub>30</sub> H <sub>26</sub> O <sub>9</sub>                                              |
| $M_r$                                                                      | 530.51                                                                                      |
| Crystal system, space group                                                | Monoclinic, $C2/c$                                                                          |
| Temperature (K)                                                            | 293                                                                                         |
| $a, b, c$ (Å)                                                              | 18.716 (4), 11.780 (3), 23.874 (6)                                                          |
| $\beta$ (°)                                                                | 106.521 (7)                                                                                 |
| $V$ (Å <sup>3</sup> )                                                      | 5046 (2)                                                                                    |
| $Z$                                                                        | 8                                                                                           |
| Radiation type                                                             | Mo $K\alpha$                                                                                |
| $\mu$ (mm <sup>-1</sup> )                                                  | 0.10                                                                                        |
| Crystal size (mm)                                                          | 0.26 × 0.15 × 0.05                                                                          |
| Data collection                                                            |                                                                                             |
| Diffractometer                                                             | Bruker D8 VENTURE                                                                           |
| Absorption correction                                                      | Multi-scan <i>SADABS2016/2</i> - Bruker AXS area detector scaling and absorption correction |
| $T_{\min}, T_{\max}$                                                       | 0.62, 0.99                                                                                  |
| No. of measured, independent and observed [ $I > 2\sigma(I)$ ] reflections | 45396, 4842, 2895                                                                           |

|                                                                            |                                                                                     |
|----------------------------------------------------------------------------|-------------------------------------------------------------------------------------|
| $R_{\text{int}}$                                                           | 0.190                                                                               |
| $(\sin \theta/\lambda)_{\text{max}}$ ( $\text{\AA}^{-1}$ )                 | 0.615                                                                               |
| Refinement                                                                 |                                                                                     |
| $R[F^2 > 2\sigma(F^2)], wR(F^2), S$                                        | 0.105, 0.278, 1.10                                                                  |
| No. of reflections                                                         | 4842                                                                                |
| No. of parameters                                                          | 357                                                                                 |
| H-atom treatment                                                           | H-atom parameters constrained                                                       |
|                                                                            | $w = 1/[\sigma^2(F_o^2) + (0.0919P)^2 + 21.912P]$<br>where $P = (F_o^2 + 2F_c^2)/3$ |
| $\Delta\rho_{\text{max}}, \Delta\rho_{\text{min}}$ ( $e \text{\AA}^{-3}$ ) | 0.66, -0.37                                                                         |

Table S5. Geometric parameters ( $\text{\AA}$ ,  $^\circ$ ) for *rac*-(6aS\*,12bR\*,19bR\*)-6cc.

| Bond length ( $\text{\AA}$ ) |           |           |           |
|------------------------------|-----------|-----------|-----------|
| C1—C2                        | 1.383 (8) | C13A—C19A | 1.350 (6) |
| C1—C19C                      | 1.398 (7) | C13A—O14  | 1.350 (5) |
| C1—H1                        | 0.9300    | C15—C14A  | 1.374 (7) |
| C2—C3                        | 1.380 (9) | C15—C16   | 1.376 (7) |
| C2—H2                        | 0.9300    | C15—H15   | 0.9300    |
| C3—C4                        | 1.370 (9) | C14A—O14  | 1.379 (6) |
| C3—H3                        | 0.9300    | C14A—C18A | 1.390 (6) |
| C4—C4A                       | 1.383 (7) | C16—O22   | 1.365 (6) |
| C4—H4                        | 0.9300    | C16—C17   | 1.398 (7) |
| C4A—O5                       | 1.376 (6) | C17—C18   | 1.389 (7) |
| C4A—C19C                     | 1.388 (7) | C17—O24   | 1.392 (7) |
| C6—O5                        | 1.435 (6) | C18—O26   | 1.376 (6) |
| C6—C6A                       | 1.514 (7) | C18—C18A  | 1.412 (7) |
| C6—H6A                       | 0.9700    | C19—O28   | 1.250 (5) |
| C6—H6B                       | 0.9700    | C19—C19A  | 1.438 (6) |
| C7—O8                        | 1.434 (6) | C19—C18A  | 1.463 (7) |
| C7—C6A                       | 1.513 (7) | C19A—C19B | 1.501 (6) |
| C7—H7A                       | 0.9700    | C19B—C19C | 1.527 (7) |
| C7—H7B                       | 0.9700    | C19B—H19B | 0.9800    |
| C6A—C19B                     | 1.532 (7) | C21—O20   | 1.409 (9) |
| C6A—C12B                     | 1.537 (6) | C21—H21A  | 0.9600    |
| C9—C10                       | 1.363 (8) | C21—H21B  | 0.9600    |
| C9—C8A                       | 1.372 (7) | C21—H21C  | 0.9600    |
| C9—H9                        | 0.9300    | C23—O22   | 1.430 (6) |

|                |           |                |           |
|----------------|-----------|----------------|-----------|
| C8A—O8         | 1.379 (6) | C23—H23A       | 0.9600    |
| C8A—C12A       | 1.390 (7) | C23—H23B       | 0.9600    |
| C10—C11        | 1.377 (8) | C23—H23C       | 0.9600    |
| C10—H10        | 0.9300    | C25—O24        | 1.295 (9) |
| C11—C12        | 1.369 (8) | C25—H25A       | 0.9600    |
| C11—O20        | 1.381 (7) | C25—H25B       | 0.9600    |
| C12—C12A       | 1.390 (7) | C25—H25C       | 0.9600    |
| C12—H12        | 0.9300    | C27—O26        | 1.418 (9) |
| C12A—C12B      | 1.491 (7) | C27—H27A       | 0.9600    |
| C12B—O13       | 1.475 (6) | C27—H27B       | 0.9600    |
| C12B—H12B      | 0.9800    | C27—H27C       | 0.9600    |
| C13A—O13       | 1.317 (5) |                |           |
| Bond angle (°) |           |                |           |
| C2—C1—C19C     | 121.5 (5) | C15—C14A—O14   | 113.9 (4) |
| C2—C1—H1       | 119.3000  | C15—C14A—C18A  | 124.3 (5) |
| C19C—C1—H1     | 119.3000  | O14—C14A—C18A  | 121.7 (4) |
| C3—C2—C1       | 119.8 (6) | O22—C16—C15    | 123.4 (5) |
| C3—C2—H2       | 120.1000  | O22—C16—C17    | 116.0 (5) |
| C1—C2—H2       | 120.1000  | C15—C16—C17    | 120.6 (5) |
| C4—C3—C2       | 119.8 (6) | C18—C17—O24    | 118.1 (5) |
| C4—C3—H3       | 120.1000  | C18—C17—C16    | 119.2 (5) |
| C2—C3—H3       | 120.1000  | O24—C17—C16    | 122.0 (5) |
| C3—C4—C4A      | 120.3 (6) | O26—C18—C17    | 118.2 (5) |
| C3—C4—H4       | 119.8000  | O26—C18—C18A   | 120.1 (4) |
| C4A—C4—H4      | 119.8000  | C17—C18—C18A   | 121.8 (4) |
| O5—C4A—C4      | 116.1 (5) | O28—C19—C19A   | 120.2 (4) |
| O5—C4A—C19C    | 122.5 (5) | O28—C19—C18A   | 123.4 (4) |
| C4—C4A—C19C    | 121.4 (5) | C19A—C19—C18A  | 116.3 (4) |
| O5—C6—C6A      | 112.3 (4) | C14A—C18A—C18  | 115.5 (4) |
| O5—C6—H6A      | 109.1000  | C14A—C18A—C19  | 119.0 (4) |
| C6A—C6—H6A     | 109.1000  | C18—C18A—C19   | 125.5 (4) |
| O5—C6—H6B      | 109.1000  | C13A—C19A—C19  | 119.3 (4) |
| C6A—C6—H6B     | 109.1000  | C13A—C19A—C19B | 118.1 (4) |
| H6A—C6—H6B     | 107.9000  | C19—C19A—C19B  | 122.6 (4) |
| O8—C7—C6A      | 112.4 (4) | C19A—C19B—C19C | 113.6 (4) |
| O8—C7—H7A      | 109.1000  | C19A—C19B—C6A  | 110.8 (4) |
| C6A—C7—H7A     | 109.1000  | C19C—C19B—C6A  | 110.8 (4) |
| O8—C7—H7B      | 109.1000  | C19A—C19B—H19B | 107.1000  |

|                |           |                |           |
|----------------|-----------|----------------|-----------|
| C6A—C7—H7B     | 109.1000  | C19C—C19B—H19B | 107.1000  |
| H7A—C7—H7B     | 107.9000  | C6A—C19B—H19B  | 107.1000  |
| C7—C6A—C6      | 109.0 (4) | C4A—C19C—C1    | 117.2 (5) |
| C7—C6A—C19B    | 110.8 (4) | C4A—C19C—C19B  | 121.7 (5) |
| C6—C6A—C19B    | 108.6 (4) | C1—C19C—C19B   | 121.1 (4) |
| C7—C6A—C12B    | 108.1 (4) | O20—C21—H21A   | 109.5000  |
| C6—C6A—C12B    | 108.9 (4) | O20—C21—H21B   | 109.5000  |
| C19B—C6A—C12B  | 111.4 (4) | H21A—C21—H21B  | 109.5000  |
| C10—C9—C8A     | 121.2 (5) | O20—C21—H21C   | 109.5000  |
| C10—C9—H9      | 119.4000  | H21A—C21—H21C  | 109.5000  |
| C8A—C9—H9      | 119.4000  | H21B—C21—H21C  | 109.5000  |
| C9—C8A—O8      | 117.5 (5) | O22—C23—H23A   | 109.5000  |
| C9—C8A—C12A    | 120.3 (5) | O22—C23—H23B   | 109.5000  |
| O8—C8A—C12A    | 122.2 (5) | H23A—C23—H23B  | 109.5000  |
| C9—C10—C11     | 119.7 (6) | O22—C23—H23C   | 109.5000  |
| C9—C10—H10     | 120.1000  | H23A—C23—H23C  | 109.5000  |
| C11—C10—H10    | 120.1000  | H23B—C23—H23C  | 109.5000  |
| C12—C11—C10    | 119.3 (5) | O24—C25—H25A   | 109.5000  |
| C12—C11—O20    | 115.7 (5) | O24—C25—H25B   | 109.5000  |
| C10—C11—O20    | 124.9 (6) | H25A—C25—H25B  | 109.5000  |
| C11—C12—C12A   | 121.9 (5) | O24—C25—H25C   | 109.5000  |
| C11—C12—H12    | 119.0000  | H25A—C25—H25C  | 109.5000  |
| C12A—C12—H12   | 119.0000  | H25B—C25—H25C  | 109.5000  |
| C12—C12A—C8A   | 117.5 (5) | O26—C27—H27A   | 109.5000  |
| C12—C12A—C12B  | 121.0 (4) | O26—C27—H27B   | 109.5000  |
| C8A—C12A—C12B  | 121.3 (4) | H27A—C27—H27B  | 109.5000  |
| O13—C12B—C12A  | 104.8 (4) | O26—C27—H27C   | 109.5000  |
| O13—C12B—C6A   | 113.5 (4) | H27A—C27—H27C  | 109.5000  |
| C12A—C12B—C6A  | 112.7 (4) | H27B—C27—H27C  | 109.5000  |
| O13—C12B—H12B  | 108.6000  | C4A—O5—C6      | 114.8 (4) |
| C12A—C12B—H12B | 108.6000  | C8A—O8—C7      | 114.6 (4) |
| C6A—C12B—H12B  | 108.6000  | C13A—O13—C12B  | 119.2 (4) |
| O13—C13A—C19A  | 127.9 (4) | C13A—O14—C14A  | 118.5 (3) |
| O13—C13A—O14   | 107.5 (4) | C11—O20—C21    | 117.9 (6) |
| C19A—C13A—O14  | 124.6 (4) | C16—O22—C23    | 117.7 (4) |
| C14A—C15—C16   | 118.5 (5) | C25—O24—C17    | 119.4 (7) |
| C14A—C15—H15   | 120.8000  | C18—O26—C27    | 114.8 (5) |
| C16—C15—H15    | 120.8000  |                |           |

| Torsional angle (°) |            |                     |            |
|---------------------|------------|---------------------|------------|
| C19C—C1—C2—C3       | 0.6 (8)    | O28—C19—C18A—C14A   | -175.0 (5) |
| C1—C2—C3—C4         | -0.9 (9)   | C19A—C19—C18A—C14A  | 4.6 (7)    |
| C2—C3—C4—C4A        | 0.1 (9)    | O28—C19—C18A—C18    | 7.7 (8)    |
| C3—C4—C4A—O5        | 178.6 (5)  | C19A—C19—C18A—C18   | -172.6 (5) |
| C3—C4—C4A—C19C      | 0.9 (8)    | O13—C13A—C19A—C19   | -174.8 (5) |
| O8—C7—C6A—C6        | -57.6 (5)  | O14—C13A—C19A—C19   | 3.8 (7)    |
| O8—C7—C6A—C19B      | -177.0 (4) | O13—C13A—C19A—C19B  | 2.6 (7)    |
| O8—C7—C6A—C12B      | 60.7 (5)   | O14—C13A—C19A—C19B  | -178.7 (4) |
| O5—C6—C6A—C7        | 176.5 (4)  | O28—C19—C19A—C13A   | 172.2 (5)  |
| O5—C6—C6A—C19B      | -62.7 (5)  | C18A—C19—C19A—C13A  | -7.5 (7)   |
| O5—C6—C6A—C12B      | 58.7 (5)   | O28—C19—C19A—C19B   | -5.2 (7)   |
| C10—C9—C8A—O8       | 179.9 (6)  | C18A—C19—C19A—C19B  | 175.1 (4)  |
| C10—C9—C8A—C12A     | -1.6 (9)   | C13A—C19A—C19B—C19C | 95.7 (5)   |
| C8A—C9—C10—C11      | -0.1 (10)  | C19—C19A—C19B—C19C  | -86.9 (5)  |
| C9—C10—C11—C12      | 1.4 (10)   | C13A—C19A—C19B—C6A  | -29.7 (6)  |
| C9—C10—C11—O20      | -177.3 (6) | C19—C19A—C19B—C6A   | 147.8 (4)  |
| C10—C11—C12—C12A    | -1.1 (9)   | C7—C6A—C19B—C19A    | -71.5 (5)  |
| O20—C11—C12—C12A    | 177.7 (5)  | C6—C6A—C19B—C19A    | 168.8 (4)  |
| C11—C12—C12A—C8A    | -0.5 (8)   | C12B—C6A—C19B—C19A  | 48.9 (5)   |
| C11—C12—C12A—C12B   | -175.5 (5) | C7—C6A—C19B—C19C    | 161.6 (4)  |
| C9—C8A—C12A—C12     | 1.8 (8)    | C6—C6A—C19B—C19C    | 41.9 (5)   |
| O8—C8A—C12A—C12     | -179.8 (5) | C12B—C6A—C19B—C19C  | -78.0 (5)  |
| C9—C8A—C12A—C12B    | 176.8 (5)  | O5—C4A—C19C—C1      | -178.7 (4) |
| O8—C8A—C12A—C12B    | -4.8 (8)   | C4—C4A—C19C—C1      | -1.2 (7)   |
| C12—C12A—C12B—O13   | 66.1 (5)   | O5—C4A—C19C—C19B    | -0.3 (7)   |
| C8A—C12A—C12B—O13   | -108.7 (5) | C4—C4A—C19C—C19B    | 177.2 (4)  |
| C12—C12A—C12B—C6A   | -170.0 (4) | C2—C1—C19C—C4A      | 0.4 (7)    |
| C8A—C12A—C12B—C6A   | 15.2 (6)   | C2—C1—C19C—C19B     | -178.0 (5) |
| C7—C6A—C12B—O13     | 78.0 (5)   | C19A—C19B—C19C—C4A  | -138.5 (4) |
| C6—C6A—C12B—O13     | -163.7 (4) | C6A—C19B—C19C—C4A   | -13.1 (6)  |
| C19B—C6A—C12B—O13   | -43.9 (5)  | C19A—C19B—C19C—C1   | 39.9 (6)   |
| C7—C6A—C12B—C12A    | -40.9 (5)  | C6A—C19B—C19C—C1    | 165.2 (4)  |
| C6—C6A—C12B—C12A    | 77.4 (5)   | C4—C4A—O5—C6        | 164.1 (4)  |
| C19B—C6A—C12B—C12A  | -162.8 (4) | C19C—C4A—O5—C6      | -18.2 (6)  |
| C16—C15—C14A—O14    | -178.8 (4) | C6A—C6—O5—C4A       | 50.4 (5)   |
| C16—C15—C14A—C18A   | 2.3 (8)    | C9—C8A—O8—C7        | -158.6 (5) |
| C14A—C15—C16—O22    | 178.9 (5)  | C12A—C8A—O8—C7      | 23.0 (7)   |

|                   |            |                    |            |
|-------------------|------------|--------------------|------------|
| C14A—C15—C16—C17  | -0.1 (8)   | C6A—C7—O8—C8A      | -52.0 (6)  |
| O22—C16—C17—C18   | 178.3 (5)  | C19A—C13A—O13—C12B | 3.8 (7)    |
| C15—C16—C17—C18   | -2.7 (9)   | O14—C13A—O13—C12B  | -175.1 (4) |
| O22—C16—C17—O24   | -11.0 (9)  | C12A—C12B—O13—C13A | 141.3 (4)  |
| C15—C16—C17—O24   | 168.0 (6)  | C6A—C12B—O13—C13A  | 18.0 (6)   |
| O24—C17—C18—O26   | 13.8 (9)   | O13—C13A—O14—C14A  | -177.9 (4) |
| C16—C17—C18—O26   | -175.1 (5) | C19A—C13A—O14—C14A | 3.1 (7)    |
| O24—C17—C18—C18A  | -167.6 (6) | C15—C14A—O14—C13A  | 175.0 (4)  |
| C16—C17—C18—C18A  | 3.4 (9)    | C18A—C14A—O14—C13A | -6.1 (7)   |
| C15—C14A—C18A—C18 | -1.6 (8)   | C12—C11—O20—C21    | -169.1 (7) |
| O14—C14A—C18A—C18 | 179.6 (4)  | C10—C11—O20—C21    | 9.7 (11)   |
| C15—C14A—C18A—C19 | -179.1 (5) | C15—C16—O22—C23    | 1.0 (8)    |
| O14—C14A—C18A—C19 | 2.1 (7)    | C17—C16—O22—C23    | -180.0 (5) |
| O26—C18—C18A—C14A | 177.2 (5)  | C18—C17—O24—C25    | -121.6 (8) |
| C17—C18—C18A—C14A | -1.3 (8)   | C16—C17—O24—C25    | 67.6 (9)   |
| O26—C18—C18A—C19  | -5.5 (8)   | C17—C18—O26—C27    | -92.1 (7)  |
| C17—C18—C18A—C19  | 176.0 (5)  | C18A—C18—O26—C27   | 89.3 (7)   |

Table S6. Hydrogen-bond geometry (Å, °) for *rac*-(6a*S*\*,12b*R*\*,19b*R*\*)-6cc.

| <i>D</i> —H... <i>A</i>                          | <i>D</i> —H | H... <i>A</i> | <i>D</i> ... <i>A</i> | <i>D</i> —H... <i>A</i> |
|--------------------------------------------------|-------------|---------------|-----------------------|-------------------------|
| C7—H7A...O28 <sup>i</sup>                        | 0.97        | 2.29          | 3.190 (6)             | 154                     |
| C9—H9...O8 <sup>ii</sup>                         | 0.93        | 2.52          | 3.424 (7)             | 163                     |
| C12 <i>B</i> —H12 <i>B</i> ...O14 <sup>iii</sup> | 0.98        | 2.53          | 3.436 (6)             | 153                     |

Symmetry codes: (i)  $-x+1, -y, -z+1$ ; (ii)  $-x+1, y, -z+1/2$ ; (iii)  $-x+3/2, -y+1/2, -z+1$ .

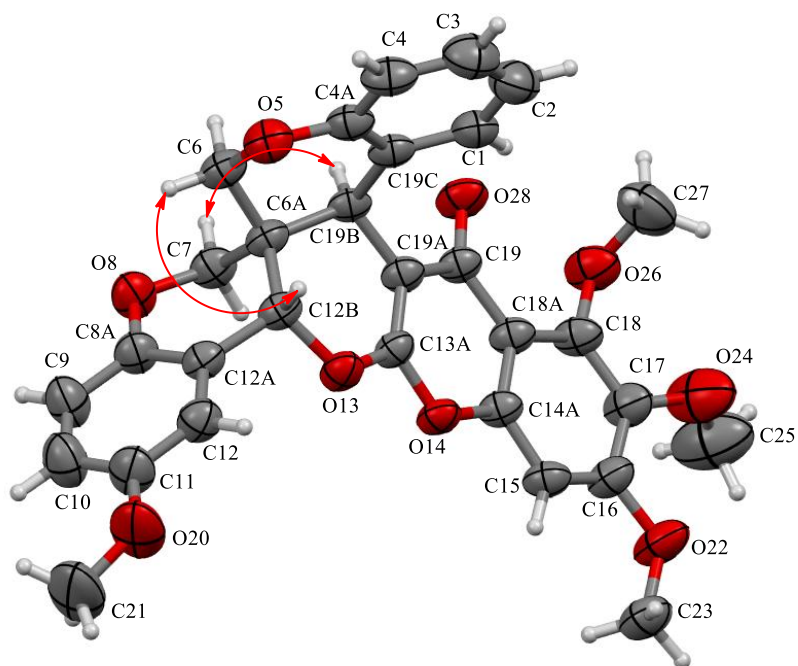

Figure S217. ORTEP view of *rac*-(6a*S*\*,12b*R*\*,19b*R*\*)-**6cc** with numbering scheme. Red curly arrows represent characteristic NOE correlations for the assignment of relative configuration.

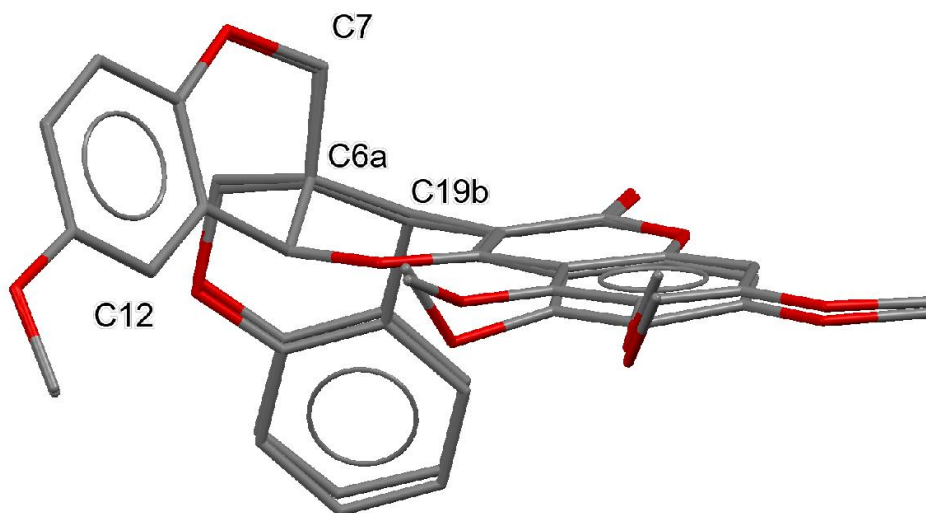

Figure S218. Overlay of the two molecules in the structure of **6cc** showing the conformational differences. Hydrogen atoms are omitted for clarity.

1. S. Balázs Király, L. Tóth, T. Kovács, A. Bényei, E. Lisztes, B. István Tóth, T. Bíró, A. Kiss-Szikszai, K. E. Kövér, A. Mándi and T. Kurtán, *Adv. Synth. Catal.*, 2023, 365, 3301-3319.
2. S. B. Király, A. Bényei, E. Lisztes, T. Bíró, B. I. Tóth and T. Kurtán, *Eur. J. Org. Chem.*, 2021, 2021, 6161-6170.
